# Supplementary material for: Physically Plausible Scenario Generation via \ Geo-Enhanced LLMs for Disaster Training
Source: Research Square preprint supplement (doi:10.21203/rs.3.rs-7715103/v1), 2025-10-07
Supplement: Supplementary file 1 [file 550495098b40f0383f2be199.xlsx]

## Sheet: 枚方市楠葉花園町4
評価	備考	シナリオID	災害の中心からの距離[m]	イベント発生時刻	付与内容	情報源	状況付与内容	補足情報	地形情報や想定想定される被害の特徴	訓練効果・狙い	判断ポイント	期待される対応行動	想定される課題	水位状況	被害の種類	詳細な被害状況	想定される対策	類似の過去事例(あれば記載)	直近のリスク	二次的なリスク
		1-1	0	発災から1分	道路の冠水	警察(110番)	ドライバーからの通報で、県道○号線の○○付近（住所：枚方市楠葉花園町4、UTM座標：〇〇〇〇〇〇）で淀川の増水により道路が冠水し始めている。現場は車両通行可能だが、今後通行不可となる恐れがある。警察官が現場で交通規制中。	警察としては他の対応もあり、交通規制を早期に道路管理者へ引き継ぎたい。	標高約10m、傾斜が非常に緩やかな低地。淀川沿いで氾濫流の影響を強く受けやすい。周辺に迂回路が少ない。	住民への周知、現地規制の引継調整（県管理道路の場合は振興局に通知）	淀川沿いの低地部で、迂回路のない地域に設定。初動での交通規制・住民周知の重要性を強調。	現地の冠水状況の確認、交通規制の実施、道路管理者への連絡、住民・ドライバーへの広報。必要に応じて避難指示の検討。	急速な水位上昇による通行不能化、情報伝達の遅れ、住民・ドライバーの避難の遅れ、道路管理者との連携不備	3.0m以上5.0m未満の浸水が想定される（24時間以上72時間未満継続）	交通インフラ被害（道路冠水・通行止め）	道路が冠水し始め、車両の通行が困難となる恐れ。今後、冠水範囲が拡大し、地域全体の交通が遮断される可能性がある。	早期の交通規制、住民への情報発信、冠水箇所のバリケード設置。避難経路の確保・周知、道路管理者との連携強化。	平成30年7月豪雨（西日本豪雨）で淀川流域の低地部で同様の道路冠水・交通遮断が発生。	['急激な浸水による車両の立ち往生', '住民の避難遅延']	['二次的な孤立地域の発生', '冠水箇所での感電や転倒事故']
		1-2	0	発災から6分	住宅地内への浸水拡大	住民	○○付近（住所：枚方市楠葉花園町4、UTM座標：〇〇〇〇〇〇）の自宅敷地内に水が流れ込んできており、玄関前まで水が迫っている。今後、家屋への浸水が心配との通報。	警察には連絡済み。消防にはまだ連絡していない。道路名を聞かれた場合：「路線番号はわかりませんが、淀川沿いの住宅地です。」	標高約10m、極めて緩やかな傾斜の低地で淀川氾濫流が直接流入しやすい。周辺の道路冠水に続き、住宅地内にも水が流れ込みやすい地形。	住民への浸水リスクの周知、早期避難の判断訓練、現地状況の迅速な把握と初動対応	淀川沿いの低地部で、道路冠水から住宅敷地への浸水拡大段階。住民からの直接的な被害通報により、避難判断や情報発信の初動を訓練。	現地の浸水状況の確認、住民への迅速な避難勧告や指示の発令、消防・警察との連携強化、危険区域の周知、避難所の開設準備。	情報伝達の遅れによる住民の避難遅延、高齢者や要支援者の避難確保、夜間や悪天候時の避難誘導、浸水拡大ペースの予測困難	3.0m以上5.0m未満の浸水が住宅敷地に拡大中（24時間以上72時間未満継続予想）	生活インフラ・住宅被害（住宅敷地浸水）	住宅地の敷地や玄関先まで水が到達し、家屋への床下・床上浸水リスクが急速に高まっている。住民の避難が遅れると人的被害や孤立の恐れもある。	住民への早期避難勧告・指示、避難所の迅速な開設・周知、要支援者リストの活用による個別支援、消防・警察・道路管理者との連携強化、現場巡回	平成30年7月豪雨（西日本豪雨）で淀川流域の低地住宅地で同様に敷地・家屋への急速な浸水拡大事例あり。	['住宅への床下・床上浸水', '住民の避難遅延による人的被害']	['地域の一時的孤立化', '電気設備やガス機器の浸水による感電・火災']
		1-3	0	発災から11分	住宅への床下浸水と避難判断の通報	住民	○○付近（住所：枚方市楠葉花園町4、UTM座標：〇〇〇〇〇〇）の自宅で、玄関から水が屋内へ流れ込み始め、床下まで水が到達した。家族で2階へ避難を開始したが、今後の対応について不安があるため通報。	警察には連絡済み。消防にも連絡する予定。道路名を聞かれた場合：「路線番号はわかりませんが、淀川沿いの住宅地です。」	標高約10m、極めて緩やかな傾斜の低地。淀川氾濫流が直接流入しやすく、住宅地内での排水困難。周辺には迂回路や高台が少ない。	住民の避難判断・避難行動の訓練、床下浸水状況での初動対応、消防・警察・自治体間の連携強化	道路・敷地冠水から住宅床下への浸水段階へ進行。避難のタイミングや、住民自らの垂直避難の判断・支援要請が訓練ポイント。	現地の床下浸水状況の即時確認、住民への避難指示や勧告の発令、消防・警察・自治体の連携による垂直避難・安全確保の支援、避難所の開設と案内、要配慮者の個別支援、危険区域の周知と立入制限。	住民の避難判断の遅れ、夜間や悪天候時の避難誘導の困難さ、高齢者・要配慮者の避難支援、床下浸水から床上浸水への急速な進行、消防・警察の現場到着遅延	3.0m以上5.0m未満の浸水が住宅床下に到達（24時間以上72時間未満継続予想）	住宅被害（床下浸水）・避難行動	住宅床下まで水が到達し、今後床上浸水に進む恐れが高い。住民が2階への垂直避難を開始しつつも、今後の安全や避難のタイミングに不安を感じている。家財の一部損傷や電気設備の浸水リスクも顕在化。	住民への迅速な避難指示・勧告、避難所開設・案内、要支援者リストによる個別支援、現地巡回と安否確認、消防・警察・自治体連携による垂直避難支援、電気・ガスの安全確認と遮断、危険区域の立入制限	平成30年7月豪雨（西日本豪雨）で淀川流域の低地住宅地にて同様の床下浸水・避難事例多数。	['住宅の床上浸水進行', '住民の避難遅延による人的被害', '電気設備の浸水による感電']	['地域の一時的孤立化', '高齢者・要支援者の避難困難', '浸水拡大による救急・消防車両の進入困難']
		1-4	0	発災から16分	住宅への床上浸水と住民孤立の通報	住民	○○付近（住所：枚方市楠葉花園町4、UTM座標：〇〇〇〇〇〇）の自宅で、1階の床上まで水が上がり、家族で2階に避難している。周囲の道路はすでに水没し、外への避難ができない状況。救助を要請したい。	警察・消防にはすでに連絡済み。道路名を聞かれた場合：「路線番号はわかりませんが、淀川沿いの住宅地です。」	標高約10m、非常に緩やかな傾斜の低地。淀川氾濫流が直接流入しやすく、住宅地全体で排水困難。周辺に高台や迂回路がほぼなく、孤立化リスクが非常に高い。	住民の孤立・床上浸水時の救助要請対応、垂直避難・救助判断訓練、現場情報の即時把握と優先順位付け	床下浸水から床上浸水へと進行し、住民が自力避難困難な孤立状態。救助要請の初動対応や救助手段の選定（ボート・ヘリ等）、要配慮者支援の優先順位判断が訓練ポイント。	現地の床上浸水・孤立状況の即時確認、住民への安否確認と救助計画の立案、消防・警察・自治体による救助隊派遣、ボートやヘリ等の救助手段の検討、避難所の案内と受入準備、要支援者リストによる優先支援、危険区域の立入制限と周辺住民への情報発信。	救助隊の現場到着遅延、浸水範囲拡大による救助困難化、夜間・悪天候時の救助活動の危険、孤立住民の健康悪化やパニック、救助要請の優先順位付けの難しさ、通信手段の途絶	3.0m以上5.0m未満の浸水が1階床上に到達（24時間以上72時間未満継続予想）	住宅被害（床上浸水）・住民孤立	住宅1階まで水が上がり、住民は2階や屋根などに垂直避難。周囲の道路や敷地は完全に水没し、外部への避難・救助が困難。高齢者や要配慮者がいる場合は生命の危険も高まる。	早期の避難指示・勧告、要支援者リストによる個別支援、現場巡回と安否確認、ボート・ヘリ等の救助手段の事前準備、電気・ガスの遮断、危険区域の立入制限、避難所の早期開設と受入体制強化	平成30年7月豪雨（西日本豪雨）で淀川流域の低地住宅地にて同様の床上浸水・孤立事例多数。岡山県真備町や広島県三原市などで救助活動が難航した記録あり。	['住宅の床上浸水による住民の孤立・生命危険', '電気設備の浸水による感電・火災', '救助遅延による健康被害']	['地域の長期的孤立化', '感染症・衛生環境の悪化', '救助活動中の二次災害（流れの強い水中での事故）']
		1-5	0	発災から22分	1階屋内への急激な浸水拡大と屋根上避難の発生	消防	○○付近（住所：枚方市楠葉花園町4、UTM座標：〇〇〇〇〇〇）の住宅地で、1階屋内全体が浸水し、複数の住民が2階や屋根上へ避難しているとの現場報告。消防隊が現地に到着したが、周囲の道路は完全に水没し、地上からの接近が困難。ボートによる救助活動を検討中。	現場付近の住民からも救助要請が複数入っている。警察・自治体とも情報共有済み。道路名を聞かれた場合：「路線番号はわかりませんが、淀川沿いの住宅地です。」	標高約10m、極めて緩やかな傾斜の低地。淀川氾濫流が直接流入しやすく、住宅地全体で排水困難。周辺に高台や迂回路がほぼなく、孤立化リスクが非常に高い。	床上浸水・住民孤立発生時の救助活動判断、ボートやヘリ等の救助手段の選定、現場情報の即時把握と救助優先順位付け訓練	床上浸水が急速に拡大し、複数世帯で2階や屋根上への避難が必要となった段階。消防隊による現地確認と地上救助の困難化、ボート・ヘリ運用など多様な救助手段の検討が訓練ポイント。	現地の床上浸水・孤立状況の即時把握、住民への安否確認と救助計画の立案、ボートやヘリ等の救助手段の準備・出動判断、要配慮者リストによる優先支援、避難所の受入体制強化、危険区域の立入制限、関係機関との連携強化。	救助隊の現場到着遅延、浸水範囲拡大による救助活動困難化、屋根上避難者の健康悪化やパニック、夜間・悪天候時の救助活動の危険、通信手段の途絶、救助要請の優先順位付けの難しさ	3.0m以上5.0m未満の浸水が1階屋内全体に拡大（24時間以上72時間未満継続予想）	住宅被害（床上浸水・屋根上避難）・住民孤立	住宅1階全体が浸水し、住民は2階や屋根上に避難。周囲の道路や敷地は完全に水没し、地上からの避難・救助が困難。複数世帯で救助要請が発生し、要配慮者や高齢者の健康リスクも高まる。	早期の避難指示・勧告、要支援者リストによる個別支援、現場巡回と安否確認、ボート・ヘリ等の救助手段の事前準備と迅速な出動、電気・ガスの遮断、危険区域の立入制限、避難所の受入体制強化、関係機関との情報共有	平成30年7月豪雨（西日本豪雨）で淀川流域の低地住宅地にて同様の床上浸水・屋根上避難・孤立事例多数。岡山県真備町や広島県三原市などで救助活動が難航した記録あり。	['住宅の床上浸水による住民の孤立・生命危険', '屋根上避難者の健康悪化・転落リスク', '電気設備の浸水による感電・火災']	['地域の長期的孤立化', '感染症・衛生環境の悪化', '救助活動中の二次災害（流れの強い水中での事故）']
		1-6	0	発災から27分	屋根上避難住民からの直接通報と救助要請	住民	○○付近（住所：枚方市楠葉花園町4、UTM座標：〇〇〇〇〇〇）の自宅で、1階が完全に水没し、家族4人が屋根の上で救助を待っている。周囲は水流が速く、地上からの避難は不可能。高齢者が1名おり、体力の低下が心配。	消防・警察には既に通報済み。道路名を聞かれた場合：「路線番号はわかりませんが、淀川沿いの住宅地です。」	標高約10m、極めて緩やかな傾斜の低地。淀川氾濫流が直接流入しやすく、住宅地全体で排水困難。周辺に高台や迂回路がほぼなく、孤立化リスクが非常に高い。	屋根上避難住民からの救助要請への即応、優先度判断、現場状況の即時把握と救助手段（ボート・ヘリ等）の選定訓練	床上浸水・屋根上避難が多数発生し、住民からの直接救助要請がある段階。救助要請の優先順位や救助手段の判断、多様な関係機関との連携が訓練ポイント。	現地の屋根上避難・孤立状況の即時把握、住民への安否確認と救助計画の立案、ボートやヘリ等の救助手段の準備・出動判断、要配慮者リストによる優先支援、避難所の受入体制強化、危険区域の立入制限、関係機関との連携強化。	救助隊の現場到着遅延、屋根上避難者の健康悪化やパニック、浸水範囲拡大による救助活動困難化、夜間・悪天候時の救助活動の危険、通信手段の途絶、救助要請の優先順位付けの難しさ	3.0m以上5.0m未満の浸水が1階屋内全体・屋根上に拡大（24時間以上72時間未満継続予想）	住宅被害（床上浸水・屋根上避難）・住民孤立・救助要請	住宅1階全体が浸水し、住民は2階や屋根上に避難。周囲の道路や敷地は完全に水没し、地上からの避難・救助が困難。複数世帯で救助要請が発生し、要配慮者や高齢者の健康リスクも高まる。	早期の避難指示・勧告、要支援者リストによる個別支援、現場巡回と安否確認、ボート・ヘリ等の救助手段の事前準備と迅速な出動、電気・ガスの遮断、危険区域の立入制限、避難所の受入体制強化、関係機関との情報共有	平成30年7月豪雨（西日本豪雨）で淀川流域の低地住宅地にて同様の床上浸水・屋根上避難・孤立事例多数。岡山県真備町や広島県三原市などで救助活動が難航した記録あり。	['住宅の床上浸水による住民の孤立・生命危険', '屋根上避難者の健康悪化・転落リスク', '電気設備の浸水による感電・火災']	['地域の長期的孤立化', '感染症・衛生環境の悪化', '救助活動中の二次災害（流れの強い水中での事故）']
		1-7	0	発災から33分	屋根上避難住民からの救助優先順位通報と現地状況の追加把握	消防	○○付近（住所：枚方市楠葉花園町4、UTM座標：〇〇〇〇〇〇）の住宅地で、複数世帯が屋根上および2階に避難している。現場到着した消防隊員より、屋根上に避難中の住民のうち、高齢者2名が脱水症状を訴えているとの報告あり。水流がさらに強まっており、地上救助は困難。ボートによる救助開始準備を進めているが、ヘリ要請の検討も必要と判断。	現場周辺より複数の救助要請が継続して入っている。道路名を聞かれた場合：「路線番号は不明ですが、淀川沿いの住宅地です」。警察・自治体とも情報共有済み。	標高約10m、極めて緩やかな傾斜の低地で淀川氾濫流が直接流入しやすく、住宅地全体で排水困難。高台や迂回路がほぼなく、孤立化リスクが非常に高い。	現地の救助優先順位判断、複数要救助者対応、要配慮者（高齢者・体調不良者）への優先救助訓練、救助手段の多様化（ボート・ヘリ等）判断訓練	複数の屋根上避難・孤立住民に対して、現場消防隊が具体的な健康状態・優先度を把握し、救助対応の優先順位付けや手段選定を行う段階。関係機関間の連携・調整と現場情報の即時共有が訓練ポイント。	現場からの詳細情報収集、要配慮者（高齢者・体調不良者）の優先救助計画立案、ボート・ヘリ等の救助手段の迅速な準備・出動判断、住民・関係機関への情報発信、避難所の受入体制強化、危険区域の立入制限、関係機関（警察・消防・自衛隊・自治体）との連携強化。	救助隊の現場到着遅延、要救助者の健康状態悪化、屋根上避難者のパニックや転落リスク、救助要請の優先順位付けの難しさ、通信手段の途絶、救助活動中の二次災害（強い流れによる事故や救助者の安全確保）	3.0m以上5.0m未満の浸水が1階全体・屋根上に拡大（24時間以上72時間未満継続予想）	住宅被害（床上浸水・屋根上避難）・住民孤立・要配慮者健康悪化	住宅1階全体が浸水し、複数世帯で2階や屋根上に避難。高齢者や体調不良者が発生し、救助要請の優先順位判断が必要。周囲道路は完全に水没し、地上救助は極めて困難。ボート・ヘリ等多様な救助手段の準備が進められている。	早期の避難指示・勧告、要支援者リストによる個別支援、現場巡回と安否確認、ボート・ヘリ等の救助手段の迅速な出動、要配慮者の優先救助、電気・ガスの遮断、危険区域の立入制限、避難所の受入体制強化、関係機関との情報共有	平成30年7月豪雨（西日本豪雨）で淀川流域の低地住宅地にて同様の床上浸水・屋根上避難・孤立事例多数。岡山県真備町や広島県三原市などで救助活動が難航した記録あり。	['住宅の床上浸水による住民の孤立・生命危険', '高齢者・体調不良者の健康悪化・脱水リスク', '屋根上避難者の転落・事故リスク', '電気設備の浸水による感電・火災']	['地域の長期的孤立化', '感染症・衛生環境の悪化', '救助活動中の二次災害（流れの強い水中での事故）']
		1-8	0	発災から38分	屋根上避難住民の救助活動本格化と現場安全確保要請	消防	○○付近（住所：枚方市楠葉花園町4、UTM座標：〇〇〇〇〇〇）の住宅地で、屋根上や2階に避難している住民の救助活動を現地消防隊が開始。水流が非常に強く、救助ボートの進入中に流木や瓦礫が多く確認されており、救助活動時の安全確保が急務となっている。現場では、複数の住民が手を振って救助を求めているが、一部住民は移動が困難な状況。	現場隊員からの追加要請で、警察による周辺道路の立入規制と、追加の救助ボート・人員の派遣が必要。道路名を聞かれた場合：「路線番号は不明ですが、淀川沿いの住宅地です」。	標高約10m、極めて緩やかな傾斜の低地。淀川氾濫流が直接流入しやすく、住宅地全体で排水困難。周辺に高台や迂回路がほぼなく、孤立化リスクが非常に高い。	現場安全管理と救助活動の両立、複数要救助者への優先順位判断、関係機関連携訓練、現場状況変化への即応力強化	屋根上・2階避難住民救助の本格化段階。流木・瓦礫等による救助活動の危険性増大、現場安全確保のための警察・消防・自治体の連携、追加資機材・人員要請判断が訓練ポイント。	現場の安全確保（流木・瓦礫除去、立入規制）、救助活動の継続・優先順位付け、追加ボート・人員の派遣、住民への状況説明と安心確保、要配慮者の優先救助、関係機関（警察・消防・自衛隊・自治体）との連携強化。	救助活動中の二次災害（流木衝突・転落事故）、救助隊員の安全確保、現場への追加資機材・人員到着の遅延、住民の不安増大、救助要請の優先順位付けの難しさ、通信手段の途絶	3.0m以上5.0m未満の浸水が住宅1階全体・屋根上に継続（24時間以上72時間未満継続予想）	住宅被害（床上浸水・屋根上避難）・住民孤立・救助活動中の現場安全リスク	住宅1階全体が浸水し、住民は2階や屋根上に避難。複数世帯で救助要請が続発。現場は流木や瓦礫の漂流が多く、救助ボートの進入時に衝突・転覆等の危険が高まっている。住民の中には体調不良や移動困難者も含まれ、救助活動の優先順位付けと現場安全管理が重要。	早期避難指示・勧告、要支援者リストによる個別支援、現場安全確保（立入規制・流木除去）、追加資機材・人員の迅速派遣、ボート・ヘリ等の救助手段の多様化、危険区域の立入制限、避難所の受入体制強化、関係機関との情報共有・連携	平成30年7月豪雨（西日本豪雨）で淀川流域の低地住宅地にて同様の床上浸水・屋根上避難・孤立事例多数。岡山県真備町等で救助活動中の流木衝突事故や現場隊員の安全確保が課題となった。	['住宅の床上浸水による住民の孤立・生命危険', '流木・瓦礫による救助活動中の隊員・住民の負傷', '屋根上避難者の健康悪化・転落リスク', '電気設備の浸水による感電・火災']	['地域の長期的孤立化', '感染症・衛生環境の悪化', '救助活動中の二次災害（流れの強い水中での事故・資機材損壊）']
		1-9	0	発災から43分	救助活動中の二次災害発生（救助ボートの転覆）	消防	○○付近（住所：枚方市楠葉花園町4、UTM座標：〇〇〇〇〇〇）の住宅地で、屋根上避難住民の救助活動中、救助ボートが流木に衝突し転覆。乗船していた消防隊員2名と救助中だった住民1名が水中に投げ出された。現場では直ちに他の救助隊が対応中だが、流れが速く安全確保が困難な状況。	現場付近では流木や瓦礫が多く、救助活動の継続に危険が伴う。警察・自治体には既に情報共有済み。道路名を聞かれた場合：「路線番号は不明ですが、淀川沿いの住宅地です」。	標高約10m、極めて緩やかな傾斜の低地。淀川氾濫流が直接流入しやすく、住宅地全体で排水困難。流木・瓦礫の漂流が多発しやすい地形。	救助活動中の二次災害発生時の即応訓練、隊員・住民の安全確保、現場指揮系統の確認、追加救助隊派遣判断の訓練	屋根上避難住民救助の最中に、救助隊自身が流木衝突で被災。現場の安全管理・指揮命令系統・追加救助体制の判断が訓練のポイント。	現場の安全確保と状況把握、転覆者の迅速な救助・救命処置、救助活動の一時中断・再評価、追加救助隊や資機材の派遣判断、現場指揮系統の再確認、住民・関係機関への情報発信、他現場への波及リスクの評価。	救助隊員・住民の安全確保の困難さ、二次災害発生時の現場混乱、救助計画の再構築、追加資機材・人員の到着遅延、住民・現場隊員の心理的不安、他救助現場への影響	3.0m以上5.0m未満の浸水が住宅1階全体・屋根上に継続（24時間以上72時間未満継続予想）	救助活動中の二次災害・人的被害・救助活動遅延	屋根上避難住民の救助活動中、流木の衝突により救助ボートが転覆。消防隊員2名と救助中の住民1名が水中に投げ出され、現場は一時混乱。追加の救助活動と現場安全確保が最優先課題となる。	流木・瓦礫の事前除去、救助資機材の点検・増強、安全帯・救命胴衣の徹底、現場指揮系統の明確化、現場状況に応じた救助計画の柔軟な見直し、追加救助隊・資機材の迅速派遣、住民・隊員への安全教育	平成30年7月豪雨（西日本豪雨）岡山県真備町で救助活動中のボートが流木に衝突し転覆、隊員や住民が一時行方不明となった事例あり。	['救助隊員・住民の溺水・負傷', '現場救助活動の一時停止・遅延', '住民・隊員の心理的不安増大']	['他救助現場への影響・人員不足', '救助活動中の更なる二次災害（感電・転落等）', '地域の孤立長期化']
		1-10	0	発災から48分	救助活動の一時中断と現場安全再評価	消防	○○付近（住所：枚方市楠葉花園町4、UTM座標：〇〇〇〇〇〇）の住宅地で、屋根上や2階に避難している住民への救助活動中、現場指揮隊より『流木の増加と水流の激化により、救助ボートの追加出動が危険と判断し活動を一時中断。現場の安全状況を再評価し、必要に応じて追加の救助隊・資機材の派遣を要請したい』との連絡。	現場では複数の住民が依然として屋根上・2階で救助を待っている。警察・自治体には既に情報共有済み。道路名を聞かれた場合：「路線番号は不明ですが、淀川沿いの住宅地です」。	標高約10m、極めて緩やかな傾斜の低地。淀川氾濫流が直接流入しやすく、住宅地全体で排水困難。流木・瓦礫の漂流が多発しやすい。	救助活動中の現場安全再評価、追加資機材・人員要請判断、現場の安全確保と継続的救助活動の両立訓練	救助活動中の二次災害発生を受け、現場指揮隊が安全を最優先して一時活動を中断。現場安全確保と住民救助のバランス、追加救助隊派遣の判断が訓練ポイント。	現場の安全状況再評価、救助活動の一時中断・再開判断、追加救助隊・資機材の派遣要請、現場指揮系統の明確化、住民・関係機関への情報共有、救助要請住民の優先順位付け、警察・自衛隊等との連携強化。	救助活動中の二次災害リスク増大、現場隊員・住民の安全確保、追加資機材・人員到着の遅延、現場混乱・指揮系統の乱れ、住民の不安増大、通信手段の一時途絶	3.0m以上5.0m未満の浸水が住宅1階全体・屋根上に継続（24時間以上72時間未満継続予想）	住宅被害（床上浸水・屋根上避難）・住民孤立・救助活動遅延	住宅1階全体が浸水し、住民は2階や屋根上に避難。救助活動中の二次災害発生により、現場の安全確保を優先して一時活動が中断。追加の救助隊・資機材派遣が必要な状況。住民の中には体調不良や移動困難者も含まれる。	現場安全確保（立入規制・流木除去）、追加資機材・人員の迅速派遣、現場指揮系統の明確化、ボート・ヘリ等の救助手段の多様化、住民への状況説明と安心確保、危険区域の立入制限、関係機関との情報共有・連携	平成30年7月豪雨（西日本豪雨）で淀川流域の低地住宅地にて同様の床上浸水・屋根上避難・孤立事例多数。岡山県真備町等で救助活動中の流木衝突事故や現場隊員の安全確保が課題となった。	['住宅の床上浸水による住民の孤立・生命危険', '流木・瓦礫による救助活動中の隊員・住民の負傷', '屋根上避難者の健康悪化・転落リスク', '救助活動の一時中断・遅延']	['地域の長期的孤立化', '感染症・衛生環境の悪化', '救助活動中のさらなる二次災害（流れの強い水中での事故・資機材損壊）']
		1-11	0	発災から53分	追加救助隊・資機材要請および現場指揮本部の設置	消防	○○付近（住所：枚方市楠葉花園町4、UTM座標：〇〇〇〇〇〇）の住宅地にて、現場指揮隊から『救助活動の再開にあたり、追加の救助ボート・救命胴衣・救助用ロープなど資機材の派遣と、現場に臨時指揮本部を設置したい』との要請。状況は依然として厳しく、屋根上や2階で救助を待つ住民が複数名確認されている。	現場は流木・瓦礫の漂流が多く、追加の救助隊・資機材が到着するまで救助活動は一部制限。警察・自治体・自衛隊との連携も必要。道路名を聞かれた場合：「路線番号は不明ですが、淀川沿いの住宅地です」。	標高約10m、極めて緩やかな傾斜の低地。淀川氾濫流が直接流入しやすく、住宅地全体で排水困難。流木・瓦礫の漂流が多発しやすい。	現場指揮本部の設置による指揮・調整体制強化、追加資機材・人員要請判断、現場安全確保と住民救助の両立訓練	現場安全再評価後、追加資機材・人員要請と現場指揮本部設置による指揮命令系統の強化。関係機関連携・現場状況変化への即応力強化が訓練ポイント。	現場指揮本部の設置と指揮系統の明確化、追加救助隊・資機材の迅速な派遣要請、現場安全状況の継続的評価、住民・関係機関への情報共有、救助要請住民の優先順位付け、警察・自衛隊等との連携強化。	追加資機材・人員到着までの救助活動制限、現場指揮系統の混乱防止、関係機関連携の遅れ、住民・隊員の安全確保、通信手段の維持	3.0m以上5.0m未満の浸水が住宅1階全体・屋根上に継続（24時間以上72時間未満継続予想）	住宅被害（床上浸水・屋根上避難）・住民孤立・救助活動再開準備	住宅1階全体が浸水し、住民は2階や屋根上に避難。救助活動は現場安全確保のため一時中断中だが、追加救助隊・資機材の到着と現場指揮本部設置により、救助活動再開の準備が進められている。住民の中には体調不良や移動困難者も含まれる。	現場安全確保（立入規制・流木除去）、追加資機材・人員の迅速派遣、現場指揮本部設置による指揮系統強化、救助手段の多様化、住民への状況説明と安心確保、危険区域の立入制限、関係機関との情報共有・連携	平成30年7月豪雨（西日本豪雨）で淀川流域の低地住宅地にて同様の床上浸水・屋根上避難・孤立事例多数。岡山県真備町等で救助活動中の流木衝突事故や現場隊員の安全確保が課題となった。	['住宅の床上浸水による住民の孤立・生命危険', '流木・瓦礫による救助活動中の隊員・住民の負傷', '屋根上避難者の健康悪化・転落リスク', '救助活動の一時中断・遅延']	['地域の長期的孤立化', '感染症・衛生環境の悪化', '救助活動中のさらなる二次災害（流れの強い水中での事故・資機材損壊）']
		1-12	0	発災から58分	救助活動再開と住民への現場状況説明	消防	○○付近（住所：枚方市楠葉花園町4、UTM座標：〇〇〇〇〇〇）の住宅地で、追加の救助ボート・資機材が到着し、現場指揮本部の指示のもと救助活動が再開された。現場では複数の住民が屋根上や2階で待機しており、現場隊員より住民への状況説明と安心確保のための声掛けを実施中。	現場は流木・瓦礫の漂流が続いており、救助活動は安全確認を徹底しながら段階的に実施。警察・自衛隊とも連携中。道路名を聞かれた場合：「路線番号は不明ですが、淀川沿いの住宅地です」。	標高約10m、極めて緩やかな傾斜の低地。淀川氾濫流が直接流入しやすく、住宅地全体で排水困難。周辺に高台や迂回路がほぼなく、孤立化リスクが非常に高い。	現場指揮本部主導による救助活動再開、住民への状況説明・安心確保、関係機関との連携強化訓練	現場安全対策を講じたうえでの救助活動再開段階。追加資機材・人員投入後、指揮命令系統のもとで住民救助を効率的に進める。住民への状況説明や安心確保のコミュニケーションも重視。	現場指揮本部の指示に基づく救助活動の再開、住民への状況説明・声掛け、要配慮者の優先救助、現場安全確認の継続、関係機関（警察・自衛隊・自治体）との連携強化、救助活動の進捗報告。	流木・瓦礫による救助活動の危険、住民の不安増大、追加資機材の運用調整、現場指揮系統の混乱防止、通信手段維持の困難	3.0m以上5.0m未満の浸水が住宅1階全体・屋根上に継続（24時間以上72時間未満継続予想）	住宅被害（床上浸水・屋根上避難）・住民孤立・救助活動再開	住宅1階全体が浸水し、住民は2階や屋根上に避難。現場指揮本部の設置・追加資機材の到着により、救助活動が再開。住民の中には体調不良や移動困難者も含まれ、現場では住民への状況説明や安心確保のための声掛けが行われている。	現場安全確保（立入規制・流木除去）、追加資機材・人員の迅速運用、現場指揮本部による指揮系統強化、住民への状況説明・安心確保、要配慮者の優先救助、危険区域の立入制限、関係機関との情報共有・連携	平成30年7月豪雨（西日本豪雨）で淀川流域の低地住宅地にて同様の床上浸水・屋根上避難・孤立事例多数。岡山県真備町等で救助活動再開時の現場安全管理や住民対応が課題となった。	['住宅の床上浸水による住民の孤立・生命危険', '流木・瓦礫による救助活動中の隊員・住民の負傷', '屋根上避難者の健康悪化・転落リスク', '救助活動中の現場混乱・指揮系統の乱れ']	['地域の長期的孤立化', '感染症・衛生環境の悪化', '救助活動中のさらなる二次災害（流れの強い水中での事故・資機材損壊）']
		1-13	0	発災から61分	追加救助隊による住民救出と現場医療対応開始	消防	○○付近（住所：枚方市楠葉花園町4、UTM座標：〇〇〇〇〇〇）の住宅地で、追加の救助ボート・資機材が到着し、現場指揮本部の指示のもと複数の住民の救出が順次進行中。救出された住民のなかには体調不良や低体温症の兆候が見られ、現場で応急手当班による医療対応が開始された。	救出住民の中に高齢者や持病持ちが複数名含まれている。警察・自衛隊・医療機関とも情報共有済み。道路名を聞かれた場合：「路線番号は不明ですが、淀川沿いの住宅地です」。	標高約10m、極めて緩やかな傾斜の低地。淀川氾濫流が直接流入しやすく、住宅地全体で排水困難。高台や迂回路がほぼなく、孤立化リスクが非常に高い。	救助活動の実施・現場医療対応の訓練、要配慮者の救命優先・現場連携の強化、住民の安心確保と救助後の対応力向上	救助活動再開後の住民救出と、現場応急手当の実動訓練。高齢者・要配慮者への医療対応、関係機関連携、救助後の住民ケアなど総合的な現場対応が訓練ポイント。	救助活動の継続・進捗管理、救出住民の健康状態確認と応急手当、要配慮者の医療機関搬送判断、現場安全確認、警察・自衛隊・医療機関との連携、住民への状況説明・安心確保、救助活動の記録・報告。	救助住民の健康悪化や搬送遅延、現場医療資機材の不足、救助活動中の安全確保、住民のパニックや不安拡大、通信手段の維持、関係機関連携の遅れ	3.0m以上5.0m未満の浸水が住宅1階全体・屋根上に継続（24時間以上72時間未満継続予想）	住宅被害（床上浸水・屋根上避難）・住民孤立・救助活動・現場医療対応	住宅1階全体が浸水し、住民は2階や屋根上に避難。救助活動再開後、順次住民が救出されているが、長時間の孤立や浸水による体調不良・低体温症・持病悪化等が複数例発生。現場で応急手当や医療搬送が必要となっている。	早期避難指示・勧告、要支援者リストによる個別支援、現場応急手当班の配置、医療機関との連携体制強化、救助活動中の安全管理、住民への状況説明・安心確保、関係機関との情報共有・連携	平成30年7月豪雨（西日本豪雨）岡山県真備町で床上浸水・屋根上避難・孤立住民の救助後、現場での応急手当や医療搬送が多数発生した事例あり。	['住宅の床上浸水による住民の孤立・生命危険', '救助住民の体調悪化・低体温症・持病の急変', '救助活動中の隊員・住民の負傷']	['感染症・衛生環境の悪化', '救助活動中のさらなる二次災害（流木衝突・感電等）', '医療搬送の遅延による健康被害']
		1-14	0	発災から67分	現場救助活動の最終段階と住民の広域搬送開始	消防	○○付近（住所：枚方市楠葉花園町4、UTM座標：〇〇〇〇〇〇）の住宅地で、救助活動が最終段階に入り、応急手当を受けた住民のうち、体調不良や持病の悪化が認められる複数名について、現場から医療機関への広域搬送が開始された。搬送には救急車および必要に応じてドクターヘリの活用も検討されている。	搬送対象住民には高齢者・持病持ち・低体温症の方が含まれる。現場救護所から医療機関までの搬送ルート確保が課題。警察・自衛隊・医療機関と連携中。道路名を聞かれた場合：「路線番号は不明ですが、淀川沿いの住宅地です」。	標高約10m、極めて緩やかな傾斜の低地で淀川氾濫流が直接流入しやすい。住宅地全体で排水困難・孤立化リスクが非常に高い。高台や迂回路がほぼなく、救助・搬送経路の確保が課題となる。	広域搬送体制の訓練、医療機関との連携、搬送優先順位判断、現場～搬送先間の情報伝達・調整の実践	現場応急手当後の住民広域搬送段階。救助活動の終息に向けて、医療機関との連携・搬送ルート確保・搬送優先順位判断・現場～搬送先間の情報共有が訓練のポイント。	搬送対象者の優先順位付け、救急車・ドクターヘリ等の搬送手段調整、搬送ルートの安全確認、現場から医療機関への情報連携、住民・家族への説明、搬送記録の作成、関係機関との連携強化。	搬送対象者多数による優先順位判断の難しさ、搬送ルートの冠水・障害物による遅延、救急車・ヘリの運用調整、医療機関の受入体制調整、住民・家族の不安増大、現場と搬送先間の情報伝達遅延	3.0m以上5.0m未満の浸水が住宅1階全体・屋根上に継続（24時間以上72時間未満継続予想）	住宅被害（床上浸水・屋根上避難）・住民孤立・救助活動・広域医療搬送	住宅1階全体が浸水し、住民は2階や屋根上に避難。救助活動再開後、順次住民が救出され、現場応急手当班による医療対応が行われているが、体調不良や持病悪化、低体温症等で医療機関への広域搬送が必要な住民が多数発生。救急車・ドクターヘリ等による搬送が順次行われている。	早期避難指示・勧告、要支援者リストによる個別支援、現場応急手当班・医療機関との連携体制強化、搬送ルートの事前確保・安全確認、搬送優先順位判断基準の整備、住民・家族への説明体制強化、関係機関との情報共有・連携	平成30年7月豪雨（西日本豪雨）岡山県真備町で床上浸水・屋根上避難・孤立住民の救助後、現場からの広域医療搬送が多数発生し、搬送ルートの冠水・渋滞・現場～搬送先間の連携が課題となった事例あり。	['住宅の床上浸水による住民の孤立・生命危険', '救助住民の体調悪化・低体温症・持病の急変', '搬送中の体調急変・搬送遅延']	['感染症・衛生環境の悪化', '搬送ルートの冠水・障害物による遅延', '医療機関の受入超過・連携遅延']
		1-15	0	発災から75分	現場救助活動の終息・住民安否確認と現地撤収準備	消防	○○付近（住所：枚方市楠葉花園町4、UTM座標：〇〇〇〇〇〇）の住宅地で、救助活動がほぼ完了し、現場指揮本部より『現地に残る住民の安否確認と、救助隊・資機材の安全な撤収準備を開始する』との通達。現場では一部住民の所在確認が続いているが、多数の住民は既に搬送・避難済み。	安否不明住民の中には連絡が取れない方が数名含まれる。警察・自衛隊・医療機関と引き続き連携。道路名を聞かれた場合：「路線番号は不明ですが、淀川沿いの住宅地です」。	標高約10m、極めて緩やかな傾斜の低地。淀川氾濫流が直接流入しやすく、住宅地全体で排水困難。高台や迂回路がほぼなく、孤立化リスクが非常に高い。	救助活動終息段階での住民安否確認・行方不明者捜索、現場撤収判断、関係機関連携体制の確認訓練	救助活動の終息に伴い、全住民の安否確認・行方不明者捜索、現場隊員・資機材の安全な撤収を段階的に進める。現場指揮本部・関係機関の連携・情報共有が重要な訓練ポイント。	残る住民の安否確認、行方不明者の捜索・情報収集、現場資機材の撤収準備、関係機関との撤収調整、住民・家族への状況説明、撤収後の現場安全管理（立入規制等）、活動記録・報告作成。	安否不明住民の捜索難航、現場撤収中の安全確保、資機材損耗・紛失、住民・家族の不安増大、現場と本部間の情報伝達遅延	3.0m以上5.0m未満の浸水が住宅1階全体・屋根上に継続（24時間以上72時間未満継続予想）	住宅被害（床上浸水・屋根上避難）・住民孤立・救助活動終息・安否確認	住宅1階全体が長時間浸水し、住民は2階や屋根上に避難していた。救助活動・広域搬送がほぼ完了し、現場では安否不明住民の捜索と残留者の確認、撤収準備が進行中。現場の安全管理と情報共有が重要。	早期避難指示・勧告、要支援者リストによる個別支援、現場応急手当班・医療機関との連携体制強化、撤収時の安全管理、安否確認・行方不明者捜索の徹底、住民・家族への説明体制強化、関係機関との情報共有・連携	平成30年7月豪雨（西日本豪雨）岡山県真備町で床上浸水・屋根上避難・孤立住民の救助活動終息後、安否確認・撤収段階での捜索・情報共有・住民対応が重要課題となった事例あり。	['安否不明住民の生命危険', '撤収作業中の隊員・住民の安全リスク', '現場撤収遅延・資機材損耗']	['感染症・衛生環境の悪化', '住民・家族の不安増大', '現場と本部間の情報伝達遅延']
		1-16	0	発災から76分	現場撤収・記録整理と住民・家族への最終説明	消防	○○付近（住所：枚方市楠葉花園町4、UTM座標：〇〇〇〇〇〇）の住宅地で、救助活動・安否確認が完了し、現場指揮本部より『救助隊・資機材の撤収作業を本格開始。現場活動記録と住民・家族への最終状況説明を実施する』との通達。	現地では撤収作業中も住民や家族から状況確認の問い合わせが続いている。警察・自衛隊・医療機関と連携し、最終的な住民名簿・安否リストを整理中。道路名を聞かれた場合：「路線番号は不明ですが、淀川沿いの住宅地です」。	標高約10m、極めて緩やかな傾斜の低地。淀川氾濫流が直接流入しやすく、住宅地全体で排水困難。高台や迂回路がほぼなく、孤立化リスクが非常に高い。	救助活動終息後の撤収・記録整理、住民・家族への説明体制、現場の安全管理・情報共有の確認訓練	救助活動が完全に終息し、撤収・記録整理・住民対応の最終段階。住民・家族への説明や現場安全管理、関係機関連携の確認が訓練ポイント。	撤収作業の安全管理、資機材の点検・整理、住民・家族への最終説明・状況報告、安否確認リストの確定・共有、現場の立入規制・安全措置、活動記録・報告書の作成、関係機関との最終調整。	撤収作業中の事故・負傷、資機材の紛失・損傷、住民・家族への説明対応の遅延、安否確認リストの整合性確保、現場と本部間の情報伝達遅延	3.0m以上5.0m未満の浸水が住宅1階全体・屋根上に継続（24時間以上72時間未満継続予想）	住宅被害（床上浸水・屋根上避難）・住民孤立・救助活動終息・撤収・記録整理	住宅1階全体が長時間浸水し、住民は2階や屋根上に避難していた。救助活動・広域搬送・安否確認が完了し、現場では資機材撤収・記録整理・住民対応が進行中。現場の安全管理と住民・家族への説明が中心課題。	撤収時の安全管理、活動記録の正確な作成、住民・家族への説明体制強化、安否確認リストの整合性確保、関係機関との情報共有・連携、現場の立入規制・安全措置	平成30年7月豪雨（西日本豪雨）岡山県真備町で床上浸水・屋根上避難・孤立住民の救助活動終息後、撤収・記録整理・住民対応が重要課題となった事例あり。	['撤収作業中の隊員・住民の安全リスク', '資機材の紛失・損傷', '住民・家族への説明対応の遅延']	['感染症・衛生環境の悪化', '住民・家族の不安増大', '現場と本部間の情報伝達遅延']
		1-17	0	発災から84分	現場活動の最終確認・関係機関との撤収調整	消防	○○付近（住所：枚方市楠葉花園町4、UTM座標：〇〇〇〇〇〇）の住宅地で、現場指揮本部より『撤収作業の最終段階に入り、警察・自衛隊・医療機関など関係機関と撤収タイミングや現場管理の引き継ぎについて調整を開始する』との通達。現地では活動記録・安否確認リスト・資機材点検の最終確認が進行中。	現場撤収・記録整理中も住民や家族から状況確認の問い合わせが継続。道路名を聞かれた場合：「路線番号は不明ですが、淀川沿いの住宅地です」。	標高約10m、極めて緩やかな傾斜の低地。淀川氾濫流が直接流入しやすく、住宅地全体で排水困難。高台や迂回路がほぼなく、孤立化リスクが非常に高い。	救助活動終息後の現場撤収・記録整理・関係機関との調整、住民・家族への最終説明体制の確認訓練	現場活動がほぼ完了し、撤収に向けた最終調整・関係機関との引継ぎ・住民説明を実施する段階。現場管理や情報伝達の正確性、関係機関連携の確認が訓練ポイント。	撤収作業の安全管理・最終点検、資機材の整理・搬出、活動記録・安否確認リストの確定、警察・自衛隊・医療機関との撤収・現場管理の調整、住民・家族への最終説明・状況報告、現場立入規制の再確認、活動報告書の作成と本部への提出。	撤収作業中の事故・負傷、資機材の紛失・損傷、関係機関との調整遅延、住民・家族への説明対応の遅れ、安否確認リストや活動記録の整合性確保、現場と本部間の情報伝達遅延	3.0m以上5.0m未満の浸水が住宅1階全体・屋根上に継続（24時間以上72時間未満継続予想）	住宅被害（床上浸水・屋根上避難）・住民孤立・救助活動終息・撤収・記録整理・関係機関連携	住宅1階全体が長時間浸水し、住民は2階や屋根上に避難していた。救助活動・広域搬送・安否確認が完了し、現場では資機材撤収・記録整理・住民対応が進行中。関係機関との撤収調整・現場管理引き継ぎも必要。	撤収時の安全管理、活動記録の正確な作成、住民・家族への説明体制強化、安否確認リストの整合性確保、関係機関との情報共有・連携、現場の立入規制・安全措置、現場管理の適切な引き継ぎ	平成30年7月豪雨（西日本豪雨）岡山県真備町で床上浸水・屋根上避難・孤立住民の救助活動終息後、撤収・記録整理・住民対応・関係機関連携が重要課題となった事例あり。	['撤収作業中の隊員・住民の安全リスク', '資機材の紛失・損傷', '住民・家族への説明対応の遅延', '関係機関との調整遅延']	['感染症・衛生環境の悪化', '住民・家族の不安増大', '現場と本部間の情報伝達遅延']
		1-18	0	発災から89分	撤収作業完了報告と現場閉鎖の通達	消防	○○付近（住所：枚方市楠葉花園町4、UTM座標：〇〇〇〇〇〇）の住宅地で、現場指揮本部より『全ての救助・安否確認・資機材撤収作業が完了し、現場は閉鎖。以降は必要な関係機関への現場管理の引継ぎと、住民・家族への最終状況報告を実施する』との通達。	現地では撤収後も住民や家族からの問い合わせが断続的に続いているため、引き続き問い合わせ窓口を設置。警察・自衛隊・医療機関と最終的な現場管理の引継ぎ調整を行う。道路名を聞かれた場合：「路線番号は不明ですが、淀川沿いの住宅地です」。	標高約10m、極めて緩やかな傾斜の低地で淀川氾濫流が直接流入しやすく、住宅地全体で排水困難。高台や迂回路がほぼなく、孤立化リスクが非常に高い。	救助・撤収作業の完全終息と現場閉鎖、現場管理の円滑な引継ぎ、住民・家族への最終説明体制の確認訓練	全作業完了後の現場閉鎖・管理引継ぎ。住民・家族への説明、問い合わせ対応、関係機関間の連携・情報共有の最終確認が訓練ポイント。	現場閉鎖の宣言、現場管理の関係機関（警察・自衛隊等）への正式な引継ぎ、問い合わせ窓口の設置・運用、住民・家族への最終状況説明、活動記録・報告書の本部提出、現場立入規制の維持。	現場閉鎖後の住民・家族からの問い合わせ対応遅延、現場管理引継ぎの不備、資機材や記録の紛失、現場立入規制の徹底不足、関係機関間の情報伝達の行き違い	3.0m以上5.0m未満の浸水が住宅1階全体・屋根上に継続（24時間以上72時間未満継続予想）	住宅被害（床上浸水・屋根上避難）・住民孤立・救助活動終息・撤収・現場閉鎖	住宅1階全体が長時間浸水し、住民は2階や屋根上に避難していた。救助・搬送・安否確認・撤収作業が全て完了し、現場は閉鎖。今後は現場管理の関係機関への引継ぎと住民・家族への最終説明が必要。	撤収時の安全管理、現場管理の正式な引継ぎ体制、住民・家族への説明体制強化、問い合わせ窓口の設置、活動記録の正確な提出、現場立入規制の徹底、関係機関との情報共有	平成30年7月豪雨（西日本豪雨）岡山県真備町で床上浸水・屋根上避難・孤立住民の救助活動終息後、現場閉鎖・管理引継ぎ・住民対応が重要課題となった事例あり。	['現場閉鎖後の管理不備による安全リスク', '住民・家族への説明対応の遅延', '現場立入規制の徹底不足']	['感染症・衛生環境の悪化', '住民・家族の不安増大', '現場と本部間の情報伝達遅延']
		1-19	0	発災から91分	現場閉鎖後の住民・家族からの追加問い合わせと最終対応	住民	○○付近（住所：枚方市楠葉花園町4、UTM座標：〇〇〇〇〇〇）に住む家族が、現場閉鎖後も安否や現場状況について問い合わせの電話をしている。『避難した家族がどこにいるか分からない』『現場の安全状況や立入可能か教えてほしい』などの質問が寄せられている。	現場管理は消防から警察・自治体に引き継がれている。問い合わせ窓口は市役所災害対策本部に設置中。避難所や安否確認リストの情報は本部で一元管理。	標高約10m、極めて緩やかな傾斜の低地で淀川氾濫流が直接流入しやすく、住宅地全体で排水困難。高台や迂回路がほぼなく、孤立化リスクが非常に高い。	現場閉鎖後の住民・家族対応、問い合わせ窓口運用訓練、情報共有体制の確認	救助・撤収作業が全て完了し現場閉鎖後、住民や家族から問い合わせが継続的に発生する状況を想定。問い合わせ窓口の設置・運用や、安否確認リスト・避難所情報の一元管理・情報伝達が訓練のポイント。	問い合わせ窓口での丁寧な対応、安否確認リストや避難所情報の確認・案内、現場立入規制や安全状況の説明、問い合わせ内容の記録、必要に応じて関係機関への連絡・調整。	問い合わせ件数の増加による対応遅延、情報伝達の行き違い、現場閉鎖後の立入希望者対応、安否確認リストの整合性維持、住民・家族の不安や混乱の拡大	3.0m以上5.0m未満の浸水が住宅1階全体・屋根上に継続（24時間以上72時間未満継続予想）	住宅被害（床上浸水・屋根上避難）・住民孤立・現場閉鎖後の住民対応	住宅1階全体が長時間浸水し、住民は2階や屋根上に避難していた。救助・搬送・安否確認・撤収作業が全て完了し現場は閉鎖されたが、住民や家族からの安否や現場状況に関する問い合わせが続いている。現場管理は関係機関へ引継ぎ済み。	撤収後の問い合わせ窓口設置・運用、安否確認リスト・避難所情報の一元管理、現場立入規制の徹底、住民・家族への丁寧な説明体制、関係機関との情報共有、活動記録・問い合わせ記録の整備	平成30年7月豪雨（西日本豪雨）岡山県真備町などで、救助活動終息・現場閉鎖後も住民や家族からの問い合わせが殺到し、安否確認・情報提供体制の整備が課題となった事例あり。	['現場閉鎖後の管理不備による安全リスク', '住民・家族への説明対応の遅延', '安否確認リストの整合性不備']	['住民・家族の不安増大', '現場立入規制の徹底不足', '現場と本部間の情報伝達遅延']
		1-20	0	発災から96分	現場閉鎖後の避難所運営・住民名簿整理と再安否確認	自治体職員	○○付近（住所：枚方市楠葉花園町4、UTM座標：〇〇〇〇〇〇）の避難所運営担当から、現場閉鎖後も避難所に新たな住民が追加来所しており、安否確認リストと避難所名簿の照合を進めている。家族や親族からの問い合わせも続いており、避難所での再安否確認と名簿整理を急いでいる。	避難所には高齢者や要配慮者も多く、健康状態の確認も並行して実施中。現場管理は既に警察・自治体に引き継ぎ済み。	標高約10m、極めて緩やかな傾斜の低地で淀川氾濫流が直接流入しやすく、住宅地全体で排水困難。高台や迂回路がほぼなく、孤立化リスクが非常に高い。	現場閉鎖後の避難所運営体制、住民名簿整理、安否確認の再徹底、住民・家族への説明・安心確保の訓練	現場閉鎖後、避難所での住民受入・名簿整理・安否確認が継続。問い合わせ対応や名簿の整合性、住民・家族への説明体制の強化が訓練ポイント。	避難所名簿と安否確認リストの照合、追加来所住民の受入・健康確認、問い合わせ窓口との連携、住民・家族への状況説明、名簿不一致時の追加確認・調整、関係機関との情報共有。	名簿と安否確認リストの不一致・照合遅延、追加来所住民の把握遅れ、問い合わせ件数の増加による対応遅延、住民・家族の不安拡大、健康状態の急変対応	3.0m以上5.0m未満の浸水が住宅1階全体・屋根上に継続（24時間以上72時間未満継続予想）	住宅被害（床上浸水・屋根上避難）・住民孤立・避難所運営・安否確認	住宅1階全体が長時間浸水し、住民は2階や屋根上に避難していた。救助・撤収・現場閉鎖後も、避難所には新たな住民が追加来所しており、名簿・安否確認リストの照合や健康状態確認が必要。家族・親族からの問い合わせも続いている。	避難所運営の強化、名簿・安否確認リストの一元管理、健康状態の定期確認、問い合わせ窓口の運用強化、関係機関との情報共有・連携	平成30年7月豪雨（西日本豪雨）岡山県真備町などで、救助活動・現場閉鎖後も避難所への新規来所や名簿・安否確認の照合遅れ、問い合わせ対応が課題となった事例あり。	['名簿・安否確認リストの不一致による住民の取り残し', '避難所内での健康状態急変', '問い合わせ対応の遅延']	['住民・家族の不安増大', '感染症・衛生環境の悪化', '情報伝達の行き違いによる混乱']
		1-21	0	発災から101分	避難所での健康状態急変・医療搬送要請	避難所職員	○○付近（住所：枚方市楠葉花園町4、UTM座標：〇〇〇〇〇〇）の避難所で、避難中の高齢女性1名が体調不良（呼吸苦・発熱）を訴え、医療搬送が必要と判断された。避難所内には他にも体調不安を訴える住民が数名いる。	家族は同避難所に同伴している。既往歴として心疾患あり。救急要請済み。	標高約10m、極めて緩やかな傾斜の低地で、淀川氾濫流が直接流入しやすい。住宅地全体で排水困難。高台や迂回路がほぼなく、孤立化リスクが非常に高い。	避難所運営時の健康急変対応、医療搬送要請、避難所内での健康観察・感染症対策訓練	避難所運営の中での健康急変事案発生。高齢者・要配慮者の健康管理、医療機関との連携、感染症対策・避難所内動線確保が訓練ポイント。	避難所内での健康状態確認・記録、救急隊への迅速な連絡・誘導、感染症対策の徹底（隔離・マスク着用等）、他住民への状況説明、医療機関との連携、搬送後の名簿・安否確認リストの更新。	避難所内での感染拡大リスク、健康急変者の複数発生による対応遅延、夜間や混雑時の医療搬送困難、名簿管理の遅れ、住民の不安増大	3.0m以上5.0m未満の浸水が住宅1階全体・屋根上に継続（24時間以上72時間未満継続予想）	避難所運営・健康被害・医療搬送	避難所での長時間滞在により高齢者等の健康被害（体調不良・感染症疑い）が発生。医療搬送が必要な住民が出る一方、避難所内での健康観察や感染症対策が急務となっている。	避難所での定期健康観察・体調管理、感染症対策（消毒・隔離・換気）、要配慮者リストの活用、医療機関との連携体制強化、救急要請時の動線確保・名簿更新	平成30年7月豪雨（西日本豪雨）岡山県真備町などで、避難所内での高齢者の健康急変や感染症拡大が複数発生。医療搬送・健康管理体制の課題が指摘された。	['避難所内での健康急変・重症化', '感染症の集団発生', '医療搬送遅延']	['避難所内のパニック・不安拡大', '名簿管理・安否確認の遅延', '医療機関の受入超過']
		1-22	0	発災から109分	避難所内での感染症疑いによる隔離対応および追加搬送要請	避難所職員	○○付近（住所：枚方市楠葉花園町4、UTM座標：〇〇〇〇〇〇）の避難所で、避難中の高齢男性1名に発熱・咳・倦怠感の症状がみられた。前回の体調不良者搬送を受けて、他にも体調不安を訴える住民が増加しているため、感染症対策のための隔離スペース設置と、追加の医療搬送要請を行いたい。	同居家族は同じ避難所内にいるが、濃厚接触者として同時に隔離対応が必要。既往歴として糖尿病あり。救急要請済み。	標高約10m、極めて緩やかな傾斜の低地で、淀川氾濫流が直接流入しやすく、住宅地全体で排水困難。高台や迂回路がほぼなく、孤立化リスクが非常に高い。	避難所運営時の感染症疑い事案対応、隔離措置の運用訓練、追加医療搬送要請、住民・家族への説明と感染拡大防止の徹底	避難所運営中に複数の体調不良者が発生し、感染症疑いによる隔離・搬送・情報共有が必要となる状況。動線確保や住民説明、名簿の更新、医療機関との調整が訓練のポイント。	発熱・咳等の症状者および濃厚接触者の隔離スペースへの移動、避難所内の動線分離、追加の救急隊・医療機関への連絡・調整、他住民への状況説明と感染症対策（マスク・消毒・換気）、名簿・安否リストの更新、関係機関への情報共有	避難所内での感染拡大リスク、隔離スペースの確保困難、体調不良者増加時の医療搬送遅延、住民・家族の不安拡大、名簿管理の遅れ、夜間や混雑時の動線確保困難	3.0m以上5.0m未満の浸水が住宅1階全体・屋根上に継続（24時間以上72時間未満継続予想）	避難所運営・感染症疑い・医療搬送	避難所での長時間滞在・密集状態により、複数の体調不良者（発熱・咳・倦怠感など）が発生。感染症疑いで隔離措置と追加医療搬送が必要となり、避難所運営・名簿管理・住民説明・感染拡大防止が急務となっている。	避難所での定期健康観察・体調管理、感染症対策（消毒・隔離・換気）、要配慮者リストの活用、医療機関との連携体制強化、救急要請時の動線確保・名簿更新、住民への丁寧な説明・安心確保	平成30年7月豪雨（西日本豪雨）岡山県真備町などで、避難所内での感染症疑い・健康急変事案が複数発生し、隔離措置や医療搬送・名簿管理体制の課題が指摘された。	['避難所内での感染症拡大', '健康急変者の重症化・医療搬送遅延', '名簿管理・安否確認の遅延']	['避難所内のパニック・不安拡大', '感染症の集団発生による避難所閉鎖リスク', '医療機関の受入超過・連携遅延']
		1-23	0	発災から112分	避難所内での感染症疑い者の搬送後フォローと住民説明・生活環境改善要請	避難所職員	○○付近（住所：枚方市楠葉花園町4、UTM座標：〇〇〇〇〇〇）の避難所で、感染症疑いの体調不良者の搬送後、同じスペースにいた住民から『不安が大きい』『換気が十分でなく息苦しい』『消毒液やマスクが足りない』との声が相次いでいる。避難所内の生活環境改善と、今後の感染症対策の徹底を求める要望が寄せられている。	避難所内には高齢者や小児も多く、体調不良を訴える住民が断続的に発生している。自治体の衛生担当や医療機関と連携し、物資補給や環境改善を要請中。	標高約10m、極めて緩やかな傾斜の低地で、淀川氾濫流が直接流入しやすく、住宅地全体で排水困難。高台や迂回路がほぼなく、孤立化リスクが非常に高い。	避難所運営における住民説明・安心確保、感染症対策の徹底、生活環境改善要請など多様な住民対応を訓練する。	感染症疑い者の発生・搬送後、避難所内の不安増大や生活環境への要望が増加。住民説明・感染症対策・衛生環境改善・物資補給要請など、総合的な避難所運営が訓練ポイント。	避難所内の換気・消毒・マスク等衛生資材の配布、住民への状況説明と安心確保、感染症対策の継続徹底、体調不良者の継続的健康観察、物資補給・医療機関との連携強化、名簿・安否確認リストの更新。	衛生資材やマスクの不足、避難所内の換気・動線確保困難、住民の不安増大による混乱、体調不良者の増加時の対応遅延、夜間や混雑時の管理困難、名簿管理・情報共有の遅れ	3.0m以上5.0m未満の浸水が住宅1階全体・屋根上に継続（24時間以上72時間未満継続予想）	避難所運営・感染症対策・生活環境不良	避難所での長時間滞在・密集状態により感染症疑い者が発生。搬送後も住民の不安や生活環境への要望が相次ぎ、衛生資材や換気の不足が顕在化。避難所運営・名簿管理・住民説明・感染拡大防止が急務となっている。	避難所での定期健康観察・体調管理、感染症対策（消毒・隔離・換気）、要配慮者リストの活用、医療機関との連携体制強化、衛生資材・物資の迅速補給、住民説明・安心確保の体制強化	平成30年7月豪雨（西日本豪雨）岡山県真備町などで、避難所内での感染症疑い・健康急変事案が多発し、衛生資材不足や住民説明体制の課題が指摘された。	['避難所内での感染症拡大', '健康急変者の重症化・医療搬送遅延', '名簿管理・安否確認の遅延', '住民の不安・混乱拡大']	['避難所内のパニック・不安拡大', '感染症の集団発生による避難所閉鎖リスク', '医療機関の受入超過・連携遅延', '衛生資材不足による二次的健康被害']
		1-24	0	発災から118分	避難所内での体調不良者の急増と集団健康観察体制の強化要請	避難所職員	○○付近（住所：枚方市楠葉花園町4、UTM座標：〇〇〇〇〇〇）の避難所で、複数の住民が発熱や咳、倦怠感、軽い下痢など体調不良を訴えている。これまでの感染症疑い者搬送の影響もあり、住民全体の健康状態に不安が広がっている。集団での健康観察と医療スタッフの増員派遣を要請したい。	避難所には高齢者・小児・持病持ちが多く、既に複数名が個別に医療搬送されている。現時点で重症者はいないが、症状訴えが急増している。自治体・医療機関には連絡済み。	標高約10m、極めて緩やかな傾斜の低地で、淀川氾濫流が直接流入しやすい。避難所も低地部に立地しており、長時間の避難生活によるストレス・健康リスクが高まる。	避難所運営時の集団健康観察・感染症対策体制強化訓練、要配慮者管理、医療体制の迅速な増強判断、住民説明・安心確保の強化	避難所内で体調不良者が連鎖的に増加。集団健康観察・感染症対策体制の強化、医療スタッフ増員要請、住民説明・安心確保、名簿管理の徹底が訓練ポイント。	全避難者への健康状態チェック（問診・体温測定）、症状者の隔離・動線分離、医療スタッフ・保健師の追加派遣要請、住民への状況説明・感染症対策の再徹底（マスク・手指消毒・換気）、名簿・安否確認リストの更新、自治体・医療機関との連携強化。	短時間で体調不良者が増加した際の隔離スペース・医療資材不足、避難所内でのパニックや不安拡大、名簿管理・健康観察の遅れ、夜間や混雑時の動線確保困難、感染症対策徹底の徹底困難	3.0m以上5.0m未満の浸水が住宅1階全体・屋根上に継続（24時間以上72時間未満継続予想）	避難所運営・健康被害・感染症対策	避難所での長時間滞在・密集状態により、体調不良を訴える住民が急増。感染症疑い者の個別搬送後も不安が拡大し、集団健康観察体制の強化と医療資材・人員の増強が急務となっている。	定期的な健康観察・体調管理、感染症対策（隔離・消毒・換気・動線分離）、医療スタッフ・保健師の増員、衛生資材の迅速補給、住民説明・安心確保の体制強化、名簿管理・情報共有の徹底	平成30年7月豪雨（西日本豪雨）岡山県真備町などで、避難所内での感染症疑い・健康急変事案が多発し、衛生資材・医療人員不足や住民説明体制の課題が指摘された。	['避難所内での健康急変・感染症拡大', '体調不良者の重症化・医療搬送遅延', '名簿管理・安否確認の遅延', '住民の不安・混乱拡大']	['避難所内のパニック・不安拡大', '感染症の集団発生による避難所閉鎖リスク', '医療機関の受入超過・連携遅延', '衛生資材不足による二次的健康被害']
		1-25	0	発災から122分	避難所内での医療スタッフ到着と健康観察体制の拡充	自治体職員	○○付近（住所：枚方市楠葉花園町4、UTM座標：〇〇〇〇〇〇）の避難所に、自治体の要請で医療スタッフ（保健師・看護師等）が追加到着。現場では体調不良を訴える住民が複数名おり、全避難者を対象に健康状態のチェック（問診・体温測定）を順次実施している。	避難所には高齢者・小児・持病持ちが多く、既に複数名が医療搬送済み。医療スタッフの増員は自治体・医療機関連携による派遣。	標高約10m、極めて緩やかな傾斜の低地で淀川氾濫流が直接流入しやすい。避難所も低地部に立地しており、長時間の避難生活によるストレス・健康リスクが高まる。	避難所運営時の医療体制増強、集団健康観察・感染症対策の体制強化、要配慮者の重点管理、住民への安心確保を訓練する。	避難所内で体調不良者が連鎖的に増加し、自治体要請で医療スタッフを追加派遣。全避難者の健康観察体制を強化し、感染症疑い者の早期発見・隔離、住民説明・安心確保、名簿管理の徹底が訓練ポイント。	医療スタッフによる全避難者への健康チェック、症状者の隔離・動線分離、健康観察記録の作成、要配慮者リストの活用、住民への状況説明・感染症対策の再徹底、名簿・安否確認リストの更新、自治体・医療機関との情報共有。	短時間での全避難者健康チェックの実施困難、隔離スペースや医療資材不足、住民の不安増大による混乱、夜間や混雑時の動線確保困難、名簿管理・健康観察記録の遅れ	3.0m以上5.0m未満の浸水が住宅1階全体・屋根上に継続（24時間以上72時間未満継続予想）	避難所運営・健康被害・感染症対策	避難所での長時間滞在・密集状態により、体調不良を訴える住民が急増。医療スタッフの増員により全避難者の健康観察体制を強化。感染症疑い者の隔離や住民説明も重要となり、名簿管理・健康観察記録の徹底が急務。	定期的な健康観察・体調管理、感染症対策（隔離・消毒・換気・動線分離）、医療スタッフ・保健師の増員、衛生資材の迅速補給、住民説明・安心確保の体制強化、名簿管理・情報共有の徹底	平成30年7月豪雨（西日本豪雨）岡山県真備町などで、避難所内での感染症疑い・健康急変事案が多発し、衛生資材・医療人員不足や住民説明体制の課題が指摘された。	['避難所内での健康急変・感染症拡大', '体調不良者の重症化・医療搬送遅延', '名簿管理・安否確認の遅延', '住民の不安・混乱拡大']	['避難所内のパニック・不安拡大', '感染症の集団発生による避難所閉鎖リスク', '医療機関の受入超過・連携遅延', '衛生資材不足による二次的健康被害']
		1-26	0	発災から128分	避難所内での健康観察記録の集計・感染症拡大防止の追加徹底	自治体職員	○○付近（住所：枚方市楠葉花園町4、UTM座標：〇〇〇〇〇〇）の避難所で、追加派遣の医療スタッフによる全避難者の健康状態チェックが一巡し、問診・体温測定等の記録集計を開始。感染症疑い者は隔離スペースで経過観察中。避難所全体でマスク・消毒・換気等の感染症対策の再徹底を住民にアナウンスしている。	健康観察記録は自治体本部と医療機関に逐次報告。避難所内の動線分離や換気、衛生資材の配布も強化中。新たな重症者や医療搬送要請は現時点で発生していない。	標高約10m、極めて緩やかな傾斜の低地で淀川氾濫流が直接流入しやすい。避難所も低地部に立地し、長時間の避難生活によるストレス・健康リスクが高まる。	避難所運営における健康管理体制の実効性確認、感染症拡大防止策の徹底、記録管理・情報共有訓練、住民安心確保の強化	全避難者の健康状態を記録・集計し、感染症疑い者の隔離・動線管理・衛生対策を徹底。記録の正確な管理と住民説明、感染症拡大防止策の徹底が訓練ポイント。	健康観察記録の集計・報告、感染症対策の再徹底（マスク・消毒・換気）、隔離スペースの管理、住民への状況説明・安心確保、名簿・安否確認リストの更新、自治体・医療機関との情報共有	健康観察記録の正確な集計・管理、衛生資材の不足、住民の不安や混乱、感染症対策の徹底困難、夜間や混雑時の管理調整、名簿管理・健康観察記録の遅れ	3.0m以上5.0m未満の浸水が住宅1階全体・屋根上に継続（24時間以上72時間未満継続予想）	避難所運営・健康被害・感染症対策	避難所での長時間滞在・密集状態により体調不良を訴える住民が急増。医療スタッフの増員で全避難者の健康観察体制を強化し、感染症疑い者の隔離や住民説明も重要。記録集計・名簿管理・感染症対策の徹底が急務。	定期的な健康観察・体調管理、感染症対策（隔離・消毒・換気・動線分離）、医療スタッフ・保健師の増員、衛生資材の迅速補給、住民説明・安心確保の体制強化、名簿管理・情報共有の徹底	平成30年7月豪雨（西日本豪雨）岡山県真備町などで、避難所内での感染症疑い・健康急変事案が多発し、衛生資材・医療人員不足や住民説明体制の課題が指摘された。	['避難所内での健康急変・感染症拡大', '体調不良者の重症化・医療搬送遅延', '名簿管理・安否確認の遅延', '住民の不安・混乱拡大']	['避難所内のパニック・不安拡大', '感染症の集団発生による避難所閉鎖リスク', '医療機関の受入超過・連携遅延', '衛生資材不足による二次的健康被害']
		1-27	0	発災から131分	避難所内での追加体調不良者発生・夜間対応要請	避難所職員	○○付近（住所：枚方市楠葉花園町4、UTM座標：〇〇〇〇〇〇）の避難所で、夜間に入り新たに発熱・頭痛・咳を訴える住民が2名発生。既存の隔離スペースは満床となり、夜間の医療スタッフ対応や追加隔離スペースの確保が必要との連絡が入った。	新たな体調不良者は高齢者1名と小児1名。夜間のため医療機関への搬送は翌朝以降を検討中。家族は同避難所内に同伴。自治体本部・医療機関には連絡済み。	標高約10m、極めて緩やかな傾斜の低地で淀川氾濫流が直接流入しやすい。避難所も低地部に立地し、長時間の避難生活によるストレス・健康リスクが高まる。	避難所運営時の夜間体調急変対応、追加隔離スペースの運用判断、夜間の医療体制・住民説明・安心確保の訓練	夜間に新規体調不良者が発生し、既存隔離スペースが満床。追加スペースの確保、夜間の医療スタッフ対応、住民説明・安心確保、記録管理が訓練ポイント。	夜間の体調不良者への応急対応、追加隔離スペースの迅速な設置、医療スタッフの夜間対応体制確保、症状者の経過観察記録、住民・家族への状況説明と安心確保、名簿・健康観察記録の更新、自治体・医療機関との情報共有。	夜間の人員・医療資材不足、隔離スペースの確保困難、住民・家族の不安拡大、体調不良者の重症化リスク、記録管理や名簿更新の遅延、他住民への感染拡大防止の徹底困難	3.0m以上5.0m未満の浸水が住宅1階全体・屋根上に継続（24時間以上72時間未満継続予想）	避難所運営・健康被害・感染症対策・夜間対応	避難所での長時間滞在・密集状態により体調不良者がさらに増加。既存の隔離スペースが満床となり、夜間の追加隔離や医療スタッフの対応体制が急務。住民・家族の不安や混乱も拡大しやすい状況。	夜間も含めた定期的な健康観察・体調管理、感染症対策（隔離・消毒・換気・動線分離）、医療スタッフ・保健師の夜間シフト体制、衛生資材の十分な備蓄・迅速補給、住民説明・安心確保の体制強化、名簿・健康観察記録の徹底	平成30年7月豪雨（西日本豪雨）岡山県真備町などで、避難所内での感染症疑い・健康急変事案が多発し、夜間の医療体制や衛生資材不足、住民説明体制の課題が指摘された。	['避難所内での健康急変・感染症拡大', '体調不良者の重症化・医療搬送遅延', '名簿管理・安否確認の遅延', '住民の不安・混乱拡大']	['避難所内のパニック・不安拡大', '感染症の集団発生による避難所閉鎖リスク', '医療機関の受入超過・連携遅延', '衛生資材不足による二次的健康被害']
		1-28	0	発災から138分	避難所内での夜間追加体調不良者発生と隔離体制の限界	避難所職員	○○付近（住所：枚方市楠葉花園町4、UTM座標：〇〇〇〇〇〇）の避難所で、夜間巡回中に発熱・咳・倦怠感を訴える住民がさらに1名発生。既存の隔離スペースはすでに満室であり、追加の隔離場所が確保できず、医療スタッフも夜間体制が限界に近づいている。	新たな体調不良者は成人男性。家族は同避難所に同伴しているが、夜間のため医療機関搬送は翌朝以降を検討中。自治体本部・医療機関には追加連絡済み。	標高約10m、極めて緩やかな傾斜の低地で淀川氾濫流が直接流入しやすい。避難所も低地部に立地し、長時間の避難生活によるストレス・健康リスクが高まる。	避難所運営時の夜間体調急変・隔離体制の限界対応、追加スペース確保・住民説明・医療スタッフ夜間運用の判断訓練	夜間に体調不良者が連続発生し、隔離スペース・医療スタッフとも限界。追加隔離スペースの設営判断、夜間の医療体制維持、住民説明・不安対応、記録管理が訓練ポイント。	夜間の体調不良者への応急対応、追加隔離スペースの即時設営検討、医療スタッフの夜間対応体制調整、症状者の経過観察記録、住民・家族への状況説明と不安対応、名簿・健康観察記録の更新、自治体・医療機関との情報共有。	隔離スペースの物理的限界、夜間の人員・医療資材不足、体調不良者の重症化リスク、住民・家族の不安拡大、夜間の記録管理や名簿更新の遅延、感染拡大防止の徹底困難	3.0m以上5.0m未満の浸水が住宅1階全体・屋根上に継続（24時間以上72時間未満継続予想）	避難所運営・健康被害・感染症対策・夜間対応	避難所での長時間滞在・密集状態により、夜間に体調不良者が追加発生。既存の隔離スペースが満床となり、追加隔離や夜間の医療スタッフ対応体制が急務。住民・家族の不安や混乱も拡大しやすい状況。	夜間も含めた定期的な健康観察・体調管理、感染症対策（隔離・消毒・換気・動線分離）、医療スタッフ・保健師の夜間シフト体制、衛生資材の十分な備蓄・迅速補給、住民説明・安心確保の体制強化、名簿・健康観察記録の徹底	平成30年7月豪雨（西日本豪雨）岡山県真備町などで、避難所内での感染症疑い・健康急変事案が多発し、夜間の医療体制や衛生資材不足、住民説明体制の課題が指摘された。	['避難所内での健康急変・感染症拡大', '体調不良者の重症化・医療搬送遅延', '名簿管理・安否確認の遅延', '住民の不安・混乱拡大']	['避難所内のパニック・不安拡大', '感染症の集団発生による避難所閉鎖リスク', '医療機関の受入超過・連携遅延', '衛生資材不足による二次的健康被害']
		1-29	0	発災から143分	避難所内での夜間複数体調不良者発生・追加隔離スペースの即時設営対応	避難所職員	○○付近（住所：枚方市楠葉花園町4、UTM座標：〇〇〇〇〇〇）の避難所で、夜間巡回中に新たに発熱や咳、倦怠感を訴える住民が2名追加発生。既存の隔離スペースは満床であり、職員による即時の追加隔離スペース（教室や会議室等の転用）の設営を決定。夜間のため医療機関搬送は翌朝以降を前提に、症状者の経過観察と家族の動線分離を実施中。	新たな体調不良者は高齢者1名と成人女性1名。家族は同避難所内に同伴。自治体本部・医療機関には追加連絡済み。夜間のため医療スタッフの対応体制も逼迫。	標高約10m、極めて緩やかな傾斜の低地で淀川氾濫流が直接流入しやすい。避難所も低地部に立地し、長時間の避難生活によるストレス・健康リスクが高まる。	避難所運営時の夜間体調急変・隔離スペースの拡張対応、追加スペース設営判断、住民説明・医療スタッフ夜間運用・感染症対策の現場判断力強化	夜間に体調不良者が連続発生し、隔離スペース・医療スタッフとも限界。教室や会議室等を転用した追加隔離スペースの即時設営判断、夜間体制の維持、住民説明・不安対応、記録管理が訓練ポイント。	夜間の体調不良者への応急対応、追加隔離スペースの即時設営、医療スタッフの夜間対応体制調整、症状者の経過観察記録、住民・家族への状況説明と不安対応、名簿・健康観察記録の更新、自治体・医療機関との情報共有。	隔離スペースの物理的限界、夜間の人員・医療資材不足、体調不良者の重症化リスク、住民・家族の不安拡大、夜間の記録管理や名簿更新の遅延、感染拡大防止の徹底困難	3.0m以上5.0m未満の浸水が住宅1階全体・屋根上に継続（24時間以上72時間未満継続予想）	避難所運営・健康被害・感染症対策・夜間対応	避難所での長時間滞在・密集状態により、夜間に体調不良者がさらに追加発生。既存の隔離スペースが満床となり、教室や会議室等を転用した追加隔離スペースの設営が急務。住民・家族の不安や混乱も拡大しやすい状況で、夜間の医療スタッフ体制も逼迫している。	夜間も含めた定期的な健康観察・体調管理、感染症対策（隔離・消毒・換気・動線分離）、医療スタッフ・保健師の夜間シフト体制、衛生資材の十分な備蓄・迅速補給、住民説明・安心確保の体制強化、名簿・健康観察記録の徹底、追加スペース転用の事前マニュアル整備	平成30年7月豪雨（西日本豪雨）岡山県真備町などで、避難所内での感染症疑い・健康急変事案が多発し、夜間の医療体制や衛生資材不足、住民説明体制の課題が指摘された。	['避難所内での健康急変・感染症拡大', '体調不良者の重症化・医療搬送遅延', '名簿管理・安否確認の遅延', '住民の不安・混乱拡大']	['避難所内のパニック・不安拡大', '感染症の集団発生による避難所閉鎖リスク', '医療機関の受入超過・連携遅延', '衛生資材不足による二次的健康被害']
		1-30	0	発災から146分	避難所内での夜間体調不良者続発・医療スタッフ緊急増員要請	避難所職員	○○付近（住所：枚方市楠葉花園町4、UTM座標：〇〇〇〇〇〇）の避難所で、夜間巡回中に新たに発熱や頭痛、咳を訴える住民がさらに2名発生。既存の追加隔離スペースも満床となり、避難所内の医療スタッフ体制が限界に達したため、自治体本部に対し緊急で追加の医療スタッフ（看護師・保健師等）の派遣を要請した。	新たな体調不良者は小児1名と成人女性1名。夜間のため医療機関への搬送は翌朝以降を検討中。家族は同避難所内に同伴。自治体本部・医療機関には追加連絡済み。	標高約10m、極めて緩やかな傾斜の低地で淀川氾濫流が直接流入しやすい。避難所も低地部に立地し、長時間の避難生活によるストレス・健康リスクが高まる。	夜間の避難所運営における体調急変・感染症疑い時の医療スタッフ増員要請、限界体制下での現場判断・住民説明・不安対応の訓練	夜間に体調不良者が連続発生し、隔離スペース・医療スタッフともに限界。医療スタッフの緊急増員要請、住民説明・不安対応、夜間体制維持、記録管理が訓練ポイント。	夜間の体調不良者への応急対応、自治体本部への医療スタッフ増員要請、症状者の経過観察記録、住民・家族への状況説明と不安対応、名簿・健康観察記録の更新、追加隔離スペースの再検討、自治体・医療機関との情報共有。	隔離スペース・医療資材の物理的限界、夜間の人員・医療資材不足、体調不良者の重症化リスク、住民・家族の不安拡大、夜間の記録管理や名簿更新の遅延、感染拡大防止の徹底困難	3.0m以上5.0m未満の浸水が住宅1階全体・屋根上に継続（24時間以上72時間未満継続予想）	避難所運営・健康被害・感染症対策・夜間対応	避難所での長時間滞在・密集状態により、夜間に体調不良者がさらに追加発生。既存の隔離スペースが満床となり、医療スタッフ体制も限界。自治体本部へ緊急増員要請を行う事態となり、住民・家族の不安や混乱も拡大しやすい状況。	夜間も含めた定期的な健康観察・体調管理、感染症対策（隔離・消毒・換気・動線分離）、医療スタッフ・保健師の夜間シフト体制、衛生資材の十分な備蓄・迅速補給、住民説明・安心確保の体制強化、名簿・健康観察記録の徹底、追加スペース転用の事前マニュアル整備	平成30年7月豪雨（西日本豪雨）岡山県真備町などで、避難所内での感染症疑い・健康急変事案が多発し、夜間の医療体制や衛生資材不足、住民説明体制の課題が指摘された。	['避難所内での健康急変・感染症拡大', '体調不良者の重症化・医療搬送遅延', '名簿管理・安否確認の遅延', '住民の不安・混乱拡大']	['避難所内のパニック・不安拡大', '感染症の集団発生による避難所閉鎖リスク', '医療機関の受入超過・連携遅延', '衛生資材不足による二次的健康被害']
		1-31	0	発災から151分	避難所内での夜間体調不良者追加発生・隔離スペースの再拡張要請	避難所職員	○○付近（住所：枚方市楠葉花園町4、UTM座標：〇〇〇〇〇〇）の避難所で、夜間見回り中にさらに2名（成人男性1名・高齢女性1名）が発熱・咳・全身倦怠感を訴えた。これまで設営した隔離スペースも満床となり、職員による更なる追加隔離スペース（体育館倉庫や廊下の一部区画等の転用）の設営を現場判断で決定。夜間のため医療機関搬送は翌朝以降を想定し、症状者の経過観察と家族の動線分離を実施している。	新たな体調不良者は成人男性と高齢女性。家族は同避難所内に同伴。自治体本部・医療機関には追加連絡済み。夜間のため医療スタッフの対応体制も引き続き逼迫。	標高約10m、極めて緩やかな傾斜の低地で淀川氾濫流が直接流入しやすい。避難所も低地部に立地し、長時間の避難生活によるストレス・健康リスクが高まる。	避難所運営時の夜間体調急変・隔離スペース再拡張対応、現場判断力・住民説明・感染症対策の現場運用訓練	夜間に体調不良者が連続発生し、既存隔離スペース・医療スタッフともに限界。体育館倉庫や廊下区画等を転用した更なる追加隔離スペース設営、夜間体制の維持、住民説明・不安対応、名簿・健康観察記録の徹底が訓練ポイント。	夜間の体調不良者への応急対応、追加隔離スペース（倉庫・廊下等）の即時設営、医療スタッフの夜間対応体制調整、症状者の経過観察記録、住民・家族への状況説明と不安対応、名簿・健康観察記録の更新、自治体・医療機関との情報共有。	隔離スペースの物理的限界に伴う収容困難、夜間の人員・医療資材不足、体調不良者の重症化リスク、住民・家族の不安拡大、夜間の記録管理や名簿更新の遅延、感染拡大防止の徹底困難	3.0m以上5.0m未満の浸水が住宅1階全体・屋根上に継続（24時間以上72時間未満継続予想）	避難所運営・健康被害・感染症対策・夜間対応	避難所での長時間滞在・密集状態により、夜間に体調不良者がさらに追加発生。既存・追加の隔離スペースが満床となり、体育館倉庫や廊下区画等を転用した更なる追加隔離スペースの設営が急務。住民・家族の不安や混乱も拡大しやすい状況で、夜間の医療スタッフ体制も逼迫している。	夜間も含めた定期的な健康観察・体調管理、感染症対策（隔離・消毒・換気・動線分離）、医療スタッフの夜間シフト体制、衛生資材の十分な備蓄・迅速補給、住民説明・安心確保の体制強化、名簿・健康観察記録の徹底、追加スペース転用の事前マニュアル整備	平成30年7月豪雨（西日本豪雨）岡山県真備町などで、避難所内での感染症疑い・健康急変事案が多発し、夜間の医療体制や衛生資材不足、住民説明体制の課題が指摘された。	['避難所内での健康急変・感染症拡大', '体調不良者の重症化・医療搬送遅延', '名簿管理・安否確認の遅延', '住民の不安・混乱拡大']	['避難所内のパニック・不安拡大', '感染症の集団発生による避難所閉鎖リスク', '医療機関の受入超過・連携遅延', '衛生資材不足による二次的健康被害']
		1-32	0	発災から158分	避難所内での夜間体調不良者多発・追加隔離スペースの限界突破と緊急対応会議の開催要請	避難所職員	○○付近（住所：枚方市楠葉花園町4、UTM座標：〇〇〇〇〇〇）の避難所で、夜間巡回中にさらに2名（成人女性1名・小児1名）が発熱・咳・全身倦怠感を訴えた。これまで設営した隔離スペースや廊下・倉庫等の転用スペースも全て満床となり、職員間で現場の感染症対応体制・医療スタッフ・衛生資材の限界について緊急会議を開催する必要が生じている。	新たな体調不良者は成人女性と小児。家族は同避難所内に同伴。夜間のため医療機関搬送は翌朝以降を想定。自治体本部・医療機関には追加連絡済み。住民からは『これ以上の感染拡大が心配』『夜間でも何らかの追加対応を』との強い要望が出ている。	標高約10m、極めて緩やかな傾斜の低地で淀川氾濫流が直接流入しやすい。避難所も低地部に立地し、長時間の避難生活によるストレス・健康リスクが高まる。	避難所運営時の夜間体調急変・隔離スペース限界突破時の緊急現場会議・意思決定訓練、住民説明・感染症対策・医療スタッフ夜間運用・現場判断力強化	避難所での体調不良者が連続発生し、全ての隔離スペースが満床。現場医療体制・衛生資材・人員が限界に達した段階で、職員間の緊急対応会議を開催し、方針決定・自治体本部との連携・住民説明等を総合的に判断する訓練。	夜間の体調不良者への応急対応、既存隔離スペースの再確認、緊急現場会議の開催（医療スタッフ・自治体職員・避難所責任者）、自治体本部への追加支援要請、住民・家族への状況説明と不安対応、感染症対策の再徹底、名簿・健康観察記録の更新、翌朝以降の医療搬送計画策定、自治体・医療機関との情報共有。	隔離スペース・医療資材の物理的限界、夜間の人員・医療スタッフ不足、体調不良者の重症化リスク、住民・家族の不安拡大、現場判断の遅れや混乱、名簿・健康観察記録の遅延、感染拡大防止の徹底困難	3.0m以上5.0m未満の浸水が住宅1階全体・屋根上に継続（24時間以上72時間未満継続予想）	避難所運営・健康被害・感染症対策・夜間対応・現場判断	避難所での長時間滞在・密集状態により、夜間に体調不良者がさらに追加発生。既存・追加の隔離スペースが全て満床となり、現場の医療体制・衛生資材・人員が限界に達したことで、職員間で緊急会議を開催し、今後の感染症対策・住民説明・自治体本部への支援要請など総合的な現場判断が必要となっている。	夜間も含めた定期的な健康観察・体調管理、感染症対策（隔離・消毒・換気・動線分離）、医療スタッフ・保健師の夜間シフト体制、衛生資材の十分な備蓄・迅速補給、住民説明・安心確保の体制強化、名簿・健康観察記録の徹底、現場緊急会議マニュアルの整備、自治体・医療機関との連携強化	平成30年7月豪雨（西日本豪雨）岡山県真備町などで、避難所内での感染症疑い・健康急変事案が多発し、夜間の医療体制や衛生資材不足、住民説明体制の課題、現場判断の遅れが指摘された。	['避難所内での健康急変・感染症拡大', '体調不良者の重症化・医療搬送遅延', '名簿管理・安否確認の遅延', '住民の不安・混乱拡大', '現場判断の遅れによる対応遅延']	['避難所内のパニック・不安拡大', '感染症の集団発生による避難所閉鎖リスク', '医療機関の受入超過・連携遅延', '衛生資材不足による二次的健康被害']
		1-33	0	発災から162分	避難所内での夜間体調不良者の継続発生・自治体本部への追加支援要請	避難所職員	○○付近（住所：枚方市楠葉花園町4、UTM座標：〇〇〇〇〇〇）の避難所で、夜間巡回中に新たに2名（成人男性1名・高齢女性1名）が発熱・咳・全身倦怠感を訴えた。隔離スペースは全て満床となっており、現場での対応が限界に近づいているため、自治体本部に対し緊急で追加の医療スタッフ・衛生資材・簡易隔離テントの派遣を要請した。	新たな体調不良者の家族は同避難所内に同伴。夜間のため医療機関搬送は翌朝以降を想定。住民からは『感染拡大が心配』『夜間でも追加対応を』との要望が続いている。	標高約10m、極めて緩やかな傾斜の低地で淀川氾濫流が直接流入しやすい。避難所も低地部に立地し、長時間の避難生活によるストレス・健康リスクが高まる。	避難所運営時の夜間体調急変・隔離スペース限界突破時の自治体本部への追加支援要請、現場判断力・住民説明・感染症対策の現場運用訓練	夜間に体調不良者がさらに追加発生し、全ての隔離スペースが満床。現場の医療体制・衛生資材・人員が限界に達した段階で、自治体本部への追加支援要請を迅速に行う判断力と、住民説明・感染症対策徹底が訓練ポイント。	夜間の体調不良者への応急対応、自治体本部への医療スタッフ・衛生資材・隔離テント等の追加派遣要請、症状者の経過観察記録、住民・家族への状況説明と不安対応、名簿・健康観察記録の更新、翌朝以降の医療搬送計画策定、自治体・医療機関との情報共有。	隔離スペースや医療資材の物理的限界、夜間の人員・医療スタッフ不足、体調不良者の重症化リスク、住民・家族の不安拡大、現場判断の遅れや混乱、名簿・健康観察記録の遅延、感染拡大防止の徹底困難	3.0m以上5.0m未満の浸水が住宅1階全体・屋根上に継続（24時間以上72時間未満継続予想）	避難所運営・健康被害・感染症対策・夜間対応・自治体本部連携	避難所での長時間滞在・密集状態により、夜間に体調不良者がさらに追加発生。既存・追加の隔離スペースが全て満床となり、現場の医療体制・衛生資材・人員が限界に達したことで、自治体本部への追加支援要請を実施。住民・家族の不安や混乱も拡大しやすい状況。	夜間も含めた定期的な健康観察・体調管理、感染症対策（隔離・消毒・換気・動線分離）、医療スタッフ・保健師の夜間シフト体制、衛生資材の十分な備蓄・迅速補給、住民説明・安心確保の体制強化、名簿・健康観察記録の徹底、自治体本部との連携と追加支援要請マニュアルの整備	平成30年7月豪雨（西日本豪雨）岡山県真備町などで、避難所内での感染症疑い・健康急変事案が多発し、夜間の医療体制や衛生資材不足、住民説明体制の課題、現場判断の遅れが指摘された。	['避難所内での健康急変・感染症拡大', '体調不良者の重症化・医療搬送遅延', '名簿管理・安否確認の遅延', '住民の不安・混乱拡大', '現場判断の遅れによる対応遅延']	['避難所内のパニック・不安拡大', '感染症の集団発生による避難所閉鎖リスク', '医療機関の受入超過・連携遅延', '衛生資材不足による二次的健康被害']
		1-34	0	発災から167分	避難所内での夜間体調不良者追加発生・現場体制の一時的な安定化（続報）	避難所職員	○○付近（住所：枚方市楠葉花園町4、UTM座標：〇〇〇〇〇〇）の避難所で、夜間巡回中に新たな体調不良者（発熱・咳・倦怠感を訴える成人女性1名）が発生。既存および追加の隔離スペースは満床だが、現時点で他の避難者の急激な体調悪化や集団発症はなく、職員・医療スタッフは経過観察と記録管理を強化しつつ、夜間体制を維持している。	新規体調不良者の家族は同避難所内に同伴。夜間のため医療機関搬送は翌朝以降を予定。自治体本部・医療機関には追加報告済み。住民からは『不安があるが今は落ち着いている』との声も出ている。	標高約10m、極めて緩やかな傾斜の低地で淀川氾濫流が直接流入しやすい。避難所も低地部に立地し、長時間の避難生活によるストレス・健康リスクが高まる。	夜間の避難所運営における追加体調不良者発生時の現場体制維持・記録管理・住民説明の訓練。自治体本部・医療機関との情報共有と現場安定化の確認。	隔離スペース満床状態で追加体調不良者が発生したが、現場体制は一時的に安定。夜間の医療体制維持、記録管理、住民説明・不安対応、翌朝以降の追加対応計画が訓練ポイント。	新規体調不良者への応急対応と経過観察、追加隔離スペース設営の検討継続、健康観察記録・名簿管理の徹底、住民・家族への状況説明と安心確保、自治体本部・医療機関への逐次報告、翌朝以降の医療搬送・体制強化計画の準備。	隔離スペースの物理的限界、夜間の人員・医療資材不足、住民・家族の不安継続、体調不良者の重症化リスク、記録管理や名簿更新の遅延、感染拡大防止の徹底困難	3.0m以上5.0m未満の浸水が住宅1階全体・屋根上に継続（24時間以上72時間未満継続予想）	避難所運営・健康被害・感染症対策・夜間対応	避難所での長時間滞在・密集状態により、夜間に体調不良者が連続発生。隔離スペース・医療スタッフともに限界状態だが、現場体制は一時的に安定。住民・家族の不安や混乱は継続しており、今後の追加発症や感染拡大リスクも残存。	夜間も含めた定期的な健康観察・体調管理、感染症対策（隔離・消毒・換気・動線分離）、医療スタッフの夜間シフト体制、衛生資材の十分な備蓄・迅速補給、住民説明・安心確保の体制強化、名簿・健康観察記録の徹底、翌朝以降の追加対応計画	平成30年7月豪雨（西日本豪雨）岡山県真備町などで、避難所内での感染症疑い・健康急変事案が多発し、夜間の医療体制や衛生資材不足、住民説明体制の課題が指摘された。	['避難所内での健康急変・感染症拡大', '体調不良者の重症化・医療搬送遅延', '名簿管理・安否確認の遅延', '住民の不安・混乱拡大']	['避難所内のパニック・不安拡大', '感染症の集団発生による避難所閉鎖リスク', '医療機関の受入超過・連携遅延', '衛生資材不足による二次的健康被害']
		1-35	0	発災から172分	避難所内での夜間体調不良者の新規発生・住民説明の強化要請	避難所職員	○○付近（住所：枚方市楠葉花園町4、UTM座標：〇〇〇〇〇〇）の避難所で、夜間巡回中に新たな体調不良者（発熱・咳・倦怠感を訴える成人男性1名）が発生。既存の隔離スペースは満床であり、現在は経過観察を行いながら、他の避難者との動線分離を実施している。	新規体調不良者の家族は同避難所内に同伴。夜間のため医療機関搬送は翌朝以降を予定。自治体本部・医療機関には追加報告済み。住民からは『感染拡大が心配』『経過説明をもっと聞きたい』との声も増えている。	標高約10m、極めて緩やかな傾斜の低地で淀川氾濫流が直接流入しやすい。避難所も低地部に立地し、長時間の避難生活によるストレス・健康リスクが高まる。	夜間の避難所運営における体調不良者発生時の現場体制維持、住民説明・安心確保、感染症対策・記録管理の強化訓練。	隔離スペース満床状態が継続し、追加体調不良者が発生。住民説明・不安対応、現場体制維持、感染症対策・記録管理の徹底、翌朝以降の医療搬送計画が訓練ポイント。	新規体調不良者への応急対応と経過観察、動線分離の徹底、健康観察記録・名簿管理の強化、住民・家族への状況説明と安心確保、自治体本部・医療機関への逐次報告、翌朝以降の医療搬送・体制強化計画の準備。	隔離スペースの物理的限界、夜間の人員・医療資材不足、住民・家族の不安増大、体調不良者の重症化リスク、記録管理や名簿更新の遅延、感染拡大防止の徹底困難	3.0m以上5.0m未満の浸水が住宅1階全体・屋根上に継続（24時間以上72時間未満継続予想）	避難所運営・健康被害・感染症対策・夜間対応	避難所での長時間滞在・密集状態により、夜間に体調不良者が引き続き追加発生。既存の隔離スペースがすでに満床で、動線分離や経過観察で対応中。住民・家族の不安や説明要望が高まっており、現場体制維持と記録管理が重要となっている。	夜間も含めた定期的な健康観察・体調管理、感染症対策（隔離・消毒・換気・動線分離）、医療スタッフの夜間シフト体制、衛生資材の十分な備蓄・迅速補給、住民説明・安心確保の体制強化、名簿・健康観察記録の徹底、翌朝以降の追加対応計画。	平成30年7月豪雨（西日本豪雨）岡山県真備町などで、避難所内での感染症疑い・健康急変事案が多発し、夜間の医療体制や衛生資材不足、住民説明体制の課題が指摘された。	['避難所内での健康急変・感染症拡大', '体調不良者の重症化・医療搬送遅延', '名簿管理・安否確認の遅延', '住民の不安・混乱拡大']	['避難所内のパニック・不安拡大', '感染症の集団発生による避難所閉鎖リスク', '医療機関の受入超過・連携遅延', '衛生資材不足による二次的健康被害']
		1-36	0	発災から179分	避難所内での夜間体調不良者の追加発生・経過観察体制の継続	避難所職員	○○付近（住所：枚方市楠葉花園町4、UTM座標：〇〇〇〇〇〇）の避難所で、夜間巡回中に新たな体調不良者（発熱・咳・倦怠感を訴える高齢女性1名）が発生。既存の隔離スペースは満床であり、応急対応後は経過観察と家族・他避難者との動線分離で対応している。	新規体調不良者の家族は同避難所内に同伴。夜間のため医療機関搬送は翌朝以降を予定。自治体本部・医療機関には追加報告済み。住民からは『感染拡大が心配』『経過説明をもっと聞きたい』との声が引き続き寄せられている。	標高約10m、極めて緩やかな傾斜の低地で淀川氾濫流が直接流入しやすい。避難所も低地部に立地し、長時間の避難生活によるストレス・健康リスクが高まる。	夜間の避難所運営における体調不良者追加発生時の現場体制維持、住民説明・安心確保、感染症対策・記録管理の強化訓練。	隔離スペース満床状態が継続し、夜間に追加体調不良者が発生。住民説明・不安対応、現場体制維持、感染症対策・記録管理の徹底、翌朝以降の医療搬送計画が訓練ポイント。	新規体調不良者への応急対応と経過観察、動線分離の徹底、健康観察記録・名簿管理の強化、住民・家族への状況説明と安心確保、自治体本部・医療機関への逐次報告、翌朝以降の医療搬送・体制強化計画の準備。	隔離スペースの物理的限界、夜間の人員・医療資材不足、住民・家族の不安増大、体調不良者の重症化リスク、記録管理や名簿更新の遅延、感染拡大防止の徹底困難	3.0m以上5.0m未満の浸水が住宅1階全体・屋根上に継続（24時間以上72時間未満継続予想）	避難所運営・健康被害・感染症対策・夜間対応	避難所での長時間滞在・密集状態により、夜間に体調不良者が追加発生。既存の隔離スペースが満床で、動線分離や経過観察で対応中。住民・家族の不安や説明要望が高まっており、現場体制維持と記録管理が重要となっている。	夜間も含めた定期的な健康観察・体調管理、感染症対策（隔離・消毒・換気・動線分離）、医療スタッフの夜間シフト体制、衛生資材の十分な備蓄・迅速補給、住民説明・安心確保の体制強化、名簿・健康観察記録の徹底、翌朝以降の追加対応計画。	平成30年7月豪雨（西日本豪雨）岡山県真備町などで、避難所内での感染症疑い・健康急変事案が多発し、夜間の医療体制や衛生資材不足、住民説明体制の課題が指摘された。	['避難所内での健康急変・感染症拡大', '体調不良者の重症化・医療搬送遅延', '名簿管理・安否確認の遅延', '住民の不安・混乱拡大']	['避難所内のパニック・不安拡大', '感染症の集団発生による避難所閉鎖リスク', '医療機関の受入超過・連携遅延', '衛生資材不足による二次的健康被害']
		1-37	0	発災から182分	避難所内での夜間体調不良者の新規発生・現場体制の経過観察と住民説明強化（続報）	避難所職員	○○付近（住所：枚方市楠葉花園町4、UTM座標：〇〇〇〇〇〇）の避難所で、夜間巡回中に新たな体調不良者（発熱・咳・全身倦怠感を訴える小児1名）が発生。隔離スペースは満床のため、応急対応後は家族とともに動線分離し、経過観察を継続している。	新規体調不良者の家族は同避難所内に同伴。夜間のため医療機関搬送は翌朝以降を予定。自治体本部・医療機関への追加報告済み。住民からは『不安はあるが、職員の説明で落ち着いている』との声も出ている。	標高約10m、極めて緩やかな傾斜の低地で淀川氾濫流が直接流入しやすい。避難所も低地部に立地し、長時間の避難生活によるストレス・健康リスクが高まる。	夜間の避難所運営で体調不良者が継続発生する状況下における現場体制の維持、住民説明・安心確保、感染症対策・経過観察・記録管理の強化訓練。	隔離スペース満床が継続し、追加体調不良者が発生。住民説明・不安対応、現場体制維持、感染症対策・記録管理の徹底、翌朝以降の医療搬送計画が訓練ポイント。	新規体調不良者への応急対応と経過観察、動線分離の徹底、健康観察記録・名簿管理の強化、住民・家族への状況説明と安心確保、自治体本部・医療機関への逐次報告、翌朝以降の医療搬送・体制強化計画の準備。	隔離スペースの物理的限界、夜間の人員・医療資材不足、住民・家族の不安増大、体調不良者の重症化リスク、記録管理や名簿更新の遅延、感染拡大防止の徹底困難	3.0m以上5.0m未満の浸水が住宅1階全体・屋根上に継続（24時間以上72時間未満継続予想）	避難所運営・健康被害・感染症対策・夜間対応	避難所での長時間滞在・密集状態により、夜間に体調不良者（小児）が追加発生。既存の隔離スペースが満床で、動線分離や経過観察で対応中。住民・家族の不安や説明要望が高まっており、現場体制維持と記録管理が重要となっている。	夜間も含めた定期的な健康観察・体調管理、感染症対策（隔離・消毒・換気・動線分離）、医療スタッフの夜間シフト体制、衛生資材の十分な備蓄・迅速補給、住民説明・安心確保の体制強化、名簿・健康観察記録の徹底、翌朝以降の追加対応計画。	平成30年7月豪雨（西日本豪雨）岡山県真備町などで、避難所内での感染症疑い・健康急変事案が多発し、夜間の医療体制や衛生資材不足、住民説明体制の課題が指摘された。	['避難所内での健康急変・感染症拡大', '体調不良者の重症化・医療搬送遅延', '名簿管理・安否確認の遅延', '住民の不安・混乱拡大']	['避難所内のパニック・不安拡大', '感染症の集団発生による避難所閉鎖リスク', '医療機関の受入超過・連携遅延', '衛生資材不足による二次的健康被害']

## Sheet: 枚方市楠葉並木一丁目25
評価	備考	シナリオID	災害の中心からの距離[m]	イベント発生時刻	付与内容	情報源	状況付与内容	補足情報	地形情報や想定想定される被害の特徴	訓練効果・狙い	判断ポイント	期待される対応行動	想定される課題	水位状況	被害の種類	詳細な被害状況	想定される対策	類似の過去事例(あれば記載)	直近のリスク	二次的なリスク
		1-1	405.363	発災から4分	歩道の冠水	住民	○○付近（住所：枚方市楠葉並木一丁目25、UTM座標：〇〇〇〇〇〇）の歩道が水で覆われ、通行が難しくなってきている。自転車で通勤中の住民から『足元が見えず危ないので、何らかの対応をお願いしたい』との通報。	警察には連絡済み、道路名を聞かれた場合：「路線番号はわかりませんが、楠葉花園町から楠葉並木をつなぐ道です。」	標高10.6m前後、非常に緩やかな傾斜（平均0.4%）で、淀川堤防に近接する低地。水が一時的に溜まりやすく、歩道・側溝から溢水しやすい。	住民への周知、歩行者・自転車利用者の安全確保、現地状況の早期把握	淀川沿いの低地で、道路より一段低い歩道が冠水しやすい地域。車道の被害より一歩遅れて発生する歩道被害に着目。	現地の冠水状況の確認、歩行者・自転車の通行規制、迂回路案内、住民への情報発信、道路管理者・警察との連携。	歩行者・自転車の通行規制の徹底、通勤・通学時間帯での混乱、情報伝達の遅れ、車道への冠水拡大への迅速な対応	0.5m以上1.0m未満の冠水が歩道周辺に発生	生活インフラ被害（歩道冠水・安全リスク）	歩道の冠水により歩行者や自転車利用者の通行が危険となり、転倒・感電リスクが高まる。車道にも冠水が拡大する恐れ。	歩道・側溝の排水確認、歩行者・自転車の通行規制、現場バリケード設置、住民への避難・安全喚起。	平成30年7月豪雨時、淀川流域の歩道や側道で同様の冠水・転倒事故が発生。	['歩行者・自転車の転倒事故', '側溝やマンホールの蓋外れによる落下']	['車道への冠水拡大', '救急・消防車両の通行障害']
		1-2	405.363	発災から8分	車道の冠水による通行規制	警察(110番)	○○付近（住所：枚方市楠葉並木一丁目25、UTM座標：〇〇〇〇〇〇）の車道が冠水し始め、車両の通行が難しくなってきている。現場の警察官から『路面の大部分が水で覆われ、通行中の車両が徐行を余儀なくされている。今後、通行止めの必要があるため道路管理者への早期引継ぎを希望』との連絡。	歩道の冠水については既に住民から通報あり。道路名を聞かれた場合：「路線番号はわかりませんが、楠葉花園町から楠葉並木をつなぐ幹線道路です。」	標高10.6m前後、平均傾斜0.4%の極めて緩やかな低地で、淀川堤防に近接。歩道冠水に続き、車道も排水能力を超えた冠水が発生しやすい。	住民・ドライバーへの周知、現地交通規制の迅速な実施、道路管理者・警察間の連携訓練	歩道冠水から車道冠水への拡大段階。低地部特有の排水困難な道路で、車両通行規制の初動判断・連携が訓練ポイント。	現地の冠水状況詳細確認、通行規制の即時実施・バリケード設置、住民・ドライバーへの情報発信、道路管理者・警察・消防との連携強化、迂回路案内の検討	通勤・通学時間帯での交通混乱、冠水拡大ペースの把握と規制タイミングの判断、歩行者・自転車の安全確保、情報伝達の遅れによる二次被害	1.0m以上1.5m未満の冠水が車道に拡大	交通インフラ被害（車道冠水・通行規制）	車道の広範囲が冠水し、通行中の車両が徐行・立ち往生。今後は通行止めが必要となり、交通混乱や救急・消防車両の進入困難リスクも高まる。	現地冠水状況の常時監視、迅速な通行規制・バリケード設置、住民・ドライバーへの情報発信、道路管理者・警察・消防との連携強化、必要に応じて避難指示や迂回路案内。	平成30年7月豪雨時、淀川流域の主要道路で冠水による通行止め・車両立ち往生事例多数。	['車両の立ち往生・水没事故', '通行規制遅延による二次被害']	['救急・消防車両の進入困難', '冠水区域内の孤立化']
		1-3	405.363	発災から13分	住宅敷地への浸水拡大と住民からの避難判断相談	住民	○○付近（住所：枚方市楠葉並木一丁目25、UTM座標：〇〇〇〇〇〇）の自宅敷地内で、駐車場や玄関先まで水が入り始めた。家屋への浸水が心配になり、避難すべきかどうか相談したいとの通報。	警察には既に連絡済み。消防にはまだ連絡していない。道路名を聞かれた場合：「路線番号はわかりませんが、楠葉花園町から楠葉並木をつなぐ住宅地です。」	標高約10.6m、平均傾斜0.4%の極めて緩やかな低地。淀川堤防に近接し氾濫水が流入しやすい。排水能力を超えると歩道・車道から住宅敷地へと浸水が波及しやすい地形。	住民の避難判断・初動避難行動の訓練、浸水拡大時の住民支援・情報発信、行政・消防・警察の連携強化	歩道・車道冠水から敷地内への浸水段階へ進行。住民が早期に避難判断を下せるか、また避難支援・情報提供体制が機能するかが訓練のポイント。	現地の浸水状況の即時確認、住民への避難勧告または指示の発令、要配慮者リストの確認と個別支援、消防・警察・自治体の連携による避難誘導、避難所の案内と開設準備、危険区域のバリケード設置や立入制限、現場情報の継続収集	住民の避難判断の遅れ、夜間や悪天候時の避難誘導の困難さ、高齢者・要配慮者の避難支援の手薄化、床下・床上浸水への急速な進行、現場巡回や安否確認の遅延	1.5m以上2.0m未満の冠水が敷地・玄関先まで拡大	生活インフラ・住宅被害（敷地・玄関先浸水）	住宅敷地や玄関先まで水が流入し、今後床下・床上浸水に進行するリスクが高まっている。住民の避難判断が遅れると人的被害や孤立リスクも増大。家財や車両への被害、電気設備の浸水リスクも顕在化。	住民への早期避難勧告・指示、避難所の迅速な開設・案内、要支援者リストの活用による個別支援、現場巡回とバリケード設置、排水路の詰まり除去、消防・警察・自治体の連携強化	平成30年7月豪雨（西日本豪雨）で淀川流域の住宅地にて同様の敷地・玄関先への浸水拡大事例多数。	['住宅への床下・床上浸水進行', '住民の避難遅延による人的被害', '電気設備・車両の浸水による感電・損傷']	['地域の一時的孤立化', '高齢者・要支援者の避難困難', '浸水拡大による救急・消防車両の進入困難']
		1-4	405.363	発災から18分	住宅1階への床下浸水と初期的な孤立の発生	消防	○○付近（住所：枚方市楠葉並木一丁目25、UTM座標：〇〇〇〇〇〇）の住宅地で1階床下まで水が到達し始め、『周囲の道路も冠水が進み、外への避難が困難になってきた』との現場報告。消防隊員が現地確認のうえ、住民に垂直避難を呼びかけている。	現場の住民からも複数の避難相談通報あり。警察・自治体とも情報共有済み。道路名を聞かれた場合：「路線番号はわかりませんが、楠葉花園町に近い住宅地です。」	標高約10.6m、平均傾斜0.4%の極めて緩やかな低地。淀川堤防に近く、氾濫水が流入しやすい。住宅地全体で排水能力を超えた浸水が波及しやすい地形。	床下浸水・孤立発生時の初動対応訓練、住民への垂直避難・安否確認、消防・警察・自治体の連携強化	歩道・車道・敷地への浸水から住宅1階床下への進行段階。住民の孤立リスクが顕在化し、現場での垂直避難支援や安否確認、救助要請判断が訓練ポイント。	現地の床下浸水・孤立状況の即時確認、住民への垂直避難勧告、安否確認の徹底、要配慮者リストの確認と個別支援、消防・警察・自治体の連携による救助計画立案、危険区域の立入制限、避難所の案内と受入準備、現場情報の継続収集	孤立住民の把握遅れ、夜間や悪天候時の救助困難、要配慮者の救助優先順位付け、現場への救助隊到着遅延、通信手段の途絶や情報伝達の遅れ	2.0m以上2.5m未満の浸水が住宅1階床下に到達	住宅被害（床下浸水）・住民の初期的孤立	住宅1階床下まで浸水し、今後床上浸水や完全孤立に進行するリスクが高い。周囲の道路も水没し始め、外部への避難が困難となりつつある。高齢者や要配慮者の安否確認・救助の優先順位付けが必要。	住民への垂直避難勧告・指示、避難所の早期開設と案内、要支援者リストの活用による個別支援、現場巡回と安否確認、消防・警察・自治体の連携による救助体制の強化、電気・ガスの遮断、危険区域の立入制限	平成30年7月豪雨（西日本豪雨）で淀川流域の住宅地にて同様の床下浸水・孤立事例多数。岡山県真備町などで救助活動が難航した記録あり。	['住宅の床上浸水進行', '住民の孤立・避難遅延による人的被害', '電気設備・車両の浸水による感電・損傷']	['地域の一時的孤立化', '高齢者・要支援者の避難困難', '浸水拡大による救急・消防車両の進入困難']
		1-5	405.363	発災から23分	住宅1階床上への浸水と住民からの救助要請	住民	○○付近（住所：枚方市楠葉並木一丁目25、UTM座標：〇〇〇〇〇〇）の自宅で、1階の床上まで水が上がり始め、家族全員が2階に避難した。周囲の道路はすでに水没し、外への避難ができない状況。高齢の家族もおり、救助を要請したい。	消防・警察にはすでに連絡済み。道路名を聞かれた場合：「路線番号はわかりませんが、楠葉花園町に近い住宅地です。」	標高約10.6m、平均傾斜0.4%の極めて緩やかな低地。淀川堤防に近く、氾濫水が流入しやすい。住宅地全体で排水能力を超えた浸水が波及しやすい地形。	床上浸水・住民孤立時の救助要請対応、垂直避難・救助判断訓練、現場情報の即時把握と優先順位付け	床下浸水から床上浸水へ進行し、住民が自力避難困難な孤立状態。現場からの救助要請対応や救助手段（ボート・ヘリ等）の選定、要配慮者支援の優先順位判断が訓練ポイント。	現地の床上浸水・孤立状況の即時確認、住民への安否確認と救助計画の立案、消防・警察・自治体による救助隊派遣、ボートやヘリ等の救助手段の検討、避難所の案内と受入準備、要支援者リストによる優先支援、危険区域の立入制限と周辺住民への情報発信。	救助隊の現場到着遅延、浸水範囲拡大による救助困難化、夜間・悪天候時の救助活動の危険、孤立住民の健康悪化やパニック、救助要請の優先順位付けの難しさ、通信手段の途絶	2.5m以上3.0m未満の浸水が住宅1階床上に到達	住宅被害（床上浸水）・住民孤立	住宅1階まで水が上がり、住民は2階や屋根などに垂直避難。周囲の道路や敷地は完全に水没し、外部への避難・救助が困難。高齢者や要配慮者がいる場合は生命の危険も高まる。	早期の避難指示・勧告、要支援者リストによる個別支援、現場巡回と安否確認、ボート・ヘリ等の救助手段の事前準備、電気・ガスの遮断、危険区域の立入制限、避難所の早期開設と受入体制強化	平成30年7月豪雨（西日本豪雨）で淀川流域の低地住宅地にて同様の床上浸水・孤立事例多数。岡山県真備町や広島県三原市などで救助活動が難航した記録あり。	['住宅の床上浸水による住民の孤立・生命危険', '高齢者・要配慮者の健康悪化', '電気設備の浸水による感電・火災']	['地域の長期的孤立化', '感染症・衛生環境の悪化', '救助活動中の二次災害（流れの強い水中での事故）']
		1-6	405.363	発災から29分	2階・屋根上避難住民からの直接通報と救助要請	住民	○○付近（住所：枚方市楠葉並木一丁目25、UTM座標：〇〇〇〇〇〇）の自宅で、1階が完全に水没し、家族4人が2階および屋根の上で救助を待っている。高齢者1名が体調不良を訴えている。周囲は水流が速く、地上からの避難は不可能。	消防・警察には既に通報済み。道路名を聞かれた場合：「路線番号はわかりませんが、楠葉花園町に近い住宅地です。」	標高約10.6m、平均傾斜0.4%の極めて緩やかな低地。淀川堤防に近接し、氾濫流が直接流入しやすい。住宅地全体で排水困難・孤立化リスクが非常に高い。	屋根上・2階避難住民からの救助要請への即応、優先度判断、現場状況の即時把握と救助手段（ボート・ヘリ等）の選定訓練	床上浸水・屋根上避難が発生し、住民からの直接救助要請がある段階。救助要請の優先順位や救助手段の判断、多様な関係機関との連携が訓練ポイント。	現地の屋根上・2階避難・孤立状況の即時把握、住民への安否確認と救助計画の立案、ボートやヘリ等の救助手段の準備・出動判断、要配慮者リストによる優先支援、避難所の受入体制強化、危険区域の立入制限、関係機関との連携強化。	救助隊の現場到着遅延、屋根上避難者の健康悪化やパニック、浸水範囲拡大による救助活動困難化、夜間・悪天候時の救助活動の危険、通信手段の途絶、救助要請の優先順位付けの難しさ	3.0m前後の浸水が住宅1階全体に達し、2階・屋根上避難が必要な状況	住宅被害（床上浸水・屋根上避難）・住民孤立・救助要請	住宅1階が完全に浸水し、住民は2階や屋根上に避難。周囲の道路や敷地は完全に水没し、地上からの避難・救助が困難。高齢者を含む住民から直接救助要請が発生。体調不良者もおり、迅速な対応が求められる。	早期の避難指示・勧告、要支援者リストによる個別支援、現場巡回と安否確認、ボート・ヘリ等の救助手段の事前準備と迅速な出動、電気・ガスの遮断、危険区域の立入制限、避難所の受入体制強化、関係機関との情報共有	平成30年7月豪雨（西日本豪雨）で淀川流域の低地住宅地にて同様の床上浸水・屋根上避難・孤立事例多数。岡山県真備町や広島県三原市などで救助活動が難航した記録あり。	['住宅の床上浸水による住民の孤立・生命危険', '屋根上避難者の健康悪化・転落リスク', '電気設備の浸水による感電・火災']	['地域の長期的孤立化', '感染症・衛生環境の悪化', '救助活動中の二次災害（流れの強い水中での事故）']
		1-7	405.363	発災から32分	屋根上・2階避難住民の救助要請続報（体調急変者発生）	消防	○○付近（住所：枚方市楠葉並木一丁目25、UTM座標：〇〇〇〇〇〇）にて、屋根上および2階で避難していた住民のうち、2名が体調不良を訴え、うち1名は意識がもうろうとし始めているとの現場消防隊からの報告。現地は依然として水流が強く、地上救助は困難。ボートによる救助準備を進めているが、ヘリによる救助の検討も必要と判断。	現地周辺から複数の救助要請が継続して入っており、警察・自治体とも情報共有済み。道路名を聞かれた場合：「路線番号は不明ですが、淀川沿いの住宅地です」。	標高約10.6m、極めて緩やかな傾斜（0.4%）の低地。淀川堤防に近接し、氾濫水が直接流入しやすい。住宅地全体で排水困難・孤立化リスクが非常に高い。	救助要請住民の健康状態急変時対応、要配慮者への優先救助判断、ボート・ヘリ等複数救助手段の選定、関係機関連携の即時強化	屋根上・2階避難住民の中から体調急変者が発生した段階。救助優先順位の再検討や、救助手段の多様化（ヘリ要請含む）が訓練のポイント。現場消防・警察・自治体・自衛隊等との連携・情報共有の即時性が問われる。	現場からの詳細な健康状態・人数把握、要配慮者（高齢者・体調不良者）の優先救助計画立案、ボート・ヘリ等の救助手段の迅速な準備・出動判断、住民・関係機関への情報発信、避難所の受入体制強化、危険区域の立入制限、関係機関（警察・消防・自衛隊・自治体）との連携強化	救助隊の現場到着遅延、要救助者の健康状態急変・生命危険、屋根上避難者のパニックや転落リスク、救助要請の優先順位付けの難しさ、通信手段の途絶、救助活動中の二次災害（強い流れによる事故や救助者の安全確保）	3.0m前後の浸水が住宅1階全体、2階・屋根上避難が継続	住宅被害（床上浸水・屋根上避難）・住民孤立・要配慮者健康悪化	住宅1階が完全に浸水し、住民は2階や屋根上に避難。体調急変者が発生し、迅速な救助が必要。周囲の道路や敷地は完全に水没し、地上からの救助は非常に困難。複数世帯で救助要請が続発。	早期の避難指示・勧告、要支援者リストによる個別支援、現場巡回と安否確認、ボート・ヘリ等の救助手段の迅速な出動、要配慮者の優先救助、電気・ガスの遮断、危険区域の立入制限、避難所の受入体制強化、関係機関との情報共有	平成30年7月豪雨（西日本豪雨）で淀川流域の低地住宅地にて同様の床上浸水・屋根上避難・孤立事例多数。岡山県真備町や広島県三原市などで救助活動が難航した記録あり。	['住宅の床上浸水による住民の孤立・生命危険', '高齢者・体調不良者の健康悪化・脱水リスク', '屋根上避難者の転落・事故リスク', '電気設備の浸水による感電・火災']	['地域の長期的孤立化', '感染症・衛生環境の悪化', '救助活動中の二次災害（流れの強い水中での事故）']
		1-8	405.363	発災から36分	屋根上・2階避難住民の救助活動本格化と現場安全確保要請	消防	○○付近（住所：枚方市楠葉並木一丁目25、UTM座標：〇〇〇〇〇〇）の住宅地で、屋根上や2階に避難している住民の救助活動を現地消防隊が開始。水流が強く、救助ボートの進入時に流木や瓦礫が多く確認されている。複数の住民が手を振って救助を求めているが、一部住民は移動困難な状況。	現場隊員からの追加要請で、警察による周辺道路の立入規制と、追加の救助ボート・人員の派遣が必要。道路名を聞かれた場合：「路線番号は不明ですが、淀川沿いの住宅地です」。	標高約10.6m、極めて緩やかな傾斜（0.4%）の低地。淀川堤防に近接し、氾濫水が直接流入しやすい。住宅地全体で排水困難・孤立化リスクが非常に高い。	現場安全管理と救助活動の両立、複数要救助者への優先順位判断、関係機関連携訓練、現場状況変化への即応力強化	屋根上・2階避難住民救助の本格化段階。流木・瓦礫等による救助活動の危険性増大、現場安全確保のための警察・消防・自治体の連携、追加資機材・人員要請判断が訓練ポイント。	現場の安全確保（流木・瓦礫除去、立入規制）、救助活動の継続・優先順位付け、追加ボート・人員の派遣、住民への状況説明と安心確保、要配慮者の優先救助、関係機関（警察・消防・自衛隊・自治体）との連携強化。	救助活動中の二次災害（流木衝突・転落事故）、救助隊員の安全確保、現場への追加資機材・人員到着の遅延、住民の不安増大、救助要請の優先順位付けの難しさ、通信手段の途絶	3.0m前後の浸水が住宅1階全体、2階・屋根上避難が継続	住宅被害（床上浸水・屋根上避難）・住民孤立・救助活動中の現場安全リスク	住宅1階全体が浸水し、住民は2階や屋根上に避難。複数世帯で救助要請が続発。現場は流木や瓦礫の漂流が多く、救助ボートの進入時に衝突・転覆等の危険が高まっている。住民の中には体調不良や移動困難者も含まれ、救助活動の優先順位付けと現場安全管理が重要。	早期避難指示・勧告、要支援者リストによる個別支援、現場安全確保（立入規制・流木除去）、追加資機材・人員の迅速派遣、ボート・ヘリ等の救助手段の多様化、危険区域の立入制限、避難所の受入体制強化、関係機関との情報共有・連携	平成30年7月豪雨（西日本豪雨）で淀川流域の低地住宅地にて同様の床上浸水・屋根上避難・孤立事例多数。岡山県真備町等で救助活動中の流木衝突事故や現場隊員の安全確保が課題となった。	['住宅の床上浸水による住民の孤立・生命危険', '流木・瓦礫による救助活動中の隊員・住民の負傷', '屋根上避難者の健康悪化・転落リスク', '電気設備の浸水による感電・火災']	['地域の長期的孤立化', '感染症・衛生環境の悪化', '救助活動中の二次災害（流れの強い水中での事故・資機材損壊）']
		1-9	405.363	発災から41分	救助活動中の現場指揮再調整・追加救助隊要請	消防	○○付近（住所：枚方市楠葉並木一丁目25、UTM座標：〇〇〇〇〇〇）の住宅地で、屋根上や2階に避難している住民への救助活動を続行中。現場では流木や瓦礫の増加により、進入していた救助ボートの一部が一時的に活動を中断せざるを得ない状況となった。現場指揮隊より『安全確保のため一部隊を一時退避させ、追加の救助ボート・資機材・人員の派遣を要請したい』との連絡。	現場では複数の住民が依然として屋根上・2階で救助を待っている。周辺道路は全域冠水し、陸路での接近は困難。道路名を聞かれた場合：「路線番号は不明ですが、淀川沿いの住宅地です」。	標高約10.6m、極めて緩やかな傾斜（0.4%）の低地。淀川堤防に近接し、氾濫水が直接流入しやすい。住宅地全体で排水困難・孤立化リスクが非常に高い。流木や瓦礫の漂流も多発しやすい地形。	救助活動中の現場指揮再調整、追加資機材・人員要請判断、現場の安全確保と継続的救助活動の両立訓練	流木・瓦礫の増加により救助活動の危険性がさらに高まった状況で、現場指揮系統の再調整や追加救助隊派遣の判断が訓練ポイント。現場安全確保と住民救助のバランスが問われる。	現場の安全状況再評価、救助活動の一時中断・再開判断、追加救助隊・資機材の派遣要請、現場指揮系統の明確化、住民・関係機関への情報共有、救助要請住民の優先順位付け、警察・自衛隊等との連携強化	救助活動中の二次災害（流木衝突・転覆事故）リスク増大、現場隊員・住民の安全確保、追加資機材・人員到着の遅延、現場混乱・指揮系統の乱れ、住民の不安増大、通信手段の一時途絶	3.0m前後の浸水が住宅1階全体、2階・屋根上避難が継続	住宅被害（床上浸水・屋根上避難）・住民孤立・救助活動中の現場安全リスク・救助活動遅延	住宅1階全体が浸水し、住民は2階や屋根上に避難。救助活動中に流木・瓦礫の増加で救助隊の安全確保が困難となり、一部活動を中断。追加の救助隊・資機材が必要な状況。住民の中には体調不良や移動困難者も含まれる。	現場安全確保（立入規制・流木除去）、追加資機材・人員の迅速派遣、現場指揮系統の明確化、ボート・ヘリ等の救助手段の多様化、住民への状況説明と安心確保、危険区域の立入制限、関係機関との情報共有・連携	平成30年7月豪雨（西日本豪雨）で淀川流域の低地住宅地にて同様の床上浸水・屋根上避難・孤立事例多数。岡山県真備町等で救助活動中の流木衝突事故や現場隊員の安全確保が課題となった。	['住宅の床上浸水による住民の孤立・生命危険', '流木・瓦礫による救助活動中の隊員・住民の負傷', '屋根上避難者の健康悪化・転落リスク', '救助活動の一時中断・遅延']	['地域の長期的孤立化', '感染症・衛生環境の悪化', '救助活動中の二次災害（流れの強い水中での事故・資機材損壊）']
		1-10	405.363	発災から49分	救助活動の一時中断と現場安全再評価	消防	○○付近（住所：枚方市楠葉並木一丁目25、UTM座標：〇〇〇〇〇〇）の住宅地で、屋根上や2階に避難している住民への救助活動中、現場指揮隊より『流木や瓦礫の増加、水流の激化により救助ボートの追加出動が危険と判断し、一時的に活動を中断。現場の安全状況を再評価し、必要に応じて追加の救助隊・資機材の派遣を要請したい』との連絡。	現場では複数の住民が依然として屋根上・2階で救助を待っている。警察・自治体には既に情報共有済み。道路名を聞かれた場合：「路線番号は不明ですが、淀川沿いの住宅地です」。	標高約10.6m、極めて緩やかな傾斜（0.4%）の低地。淀川堤防に近接し、氾濫水が直接流入しやすい。住宅地全体で排水困難・孤立化リスクが非常に高い。流木や瓦礫の漂流も多発しやすい地形。	救助活動中の現場安全再評価、追加資機材・人員要請判断、現場の安全確保と継続的救助活動の両立訓練	救助活動中の二次災害発生リスクを受け、現場指揮隊が安全を最優先して一時活動を中断。現場安全確保と住民救助のバランス、追加救助隊派遣の判断が訓練ポイント。	現場の安全状況再評価、救助活動の一時中断・再開判断、追加救助隊・資機材の派遣要請、現場指揮系統の明確化、住民・関係機関への情報共有、救助要請住民の優先順位付け、警察・自衛隊等との連携強化。	救助活動中の二次災害リスク増大、現場隊員・住民の安全確保、追加資機材・人員到着の遅延、現場混乱・指揮系統の乱れ、住民の不安増大、通信手段の一時途絶	3.0m前後の浸水が住宅1階全体、2階・屋根上避難が継続（24時間以上継続予想）	住宅被害（床上浸水・屋根上避難）・住民孤立・救助活動遅延	住宅1階全体が浸水し、住民は2階や屋根上に避難。救助活動中に流木・瓦礫の増加で救助隊の安全確保が困難となり、一部活動を中断。追加の救助隊・資機材が必要な状況。住民の中には体調不良や移動困難者も含まれる。	現場安全確保（立入規制・流木除去）、追加資機材・人員の迅速派遣、現場指揮系統の明確化、ボート・ヘリ等の救助手段の多様化、住民への状況説明と安心確保、危険区域の立入制限、関係機関との情報共有・連携	平成30年7月豪雨（西日本豪雨）で淀川流域の低地住宅地にて同様の床上浸水・屋根上避難・孤立事例多数。岡山県真備町等で救助活動中の流木衝突事故や現場隊員の安全確保が課題となった。	['住宅の床上浸水による住民の孤立・生命危険', '流木・瓦礫による救助活動中の隊員・住民の負傷', '屋根上避難者の健康悪化・転落リスク', '救助活動の一時中断・遅延']	['地域の長期的孤立化', '感染症・衛生環境の悪化', '救助活動中の二次災害（流れの強い水中での事故・資機材損壊）']
		1-11	405.363	発災から53分	追加救助隊・資機材要請および現場指揮本部の設置	消防	○○付近（住所：枚方市楠葉並木一丁目25、UTM座標：〇〇〇〇〇〇）の住宅地にて、現場指揮隊から『救助活動の再開にあたり、追加の救助ボート・救命胴衣・救助用ロープなど資機材の派遣と、現場に臨時指揮本部を設置したい』との要請。状況は依然として厳しく、屋根上や2階で救助を待つ住民が複数名確認されている。	現場は流木・瓦礫の漂流が多く、追加の救助隊・資機材が到着するまで救助活動は一部制限。警察・自治体・自衛隊との連携も必要。道路名を聞かれた場合：「路線番号は不明ですが、淀川沿いの住宅地です」。	標高約10.6m、極めて緩やかな傾斜（0.4%）の低地。淀川堤防に近接し、氾濫水が直接流入しやすい。住宅地全体で排水困難・孤立化リスクが非常に高い。流木や瓦礫の漂流も多発しやすい地形。	現場指揮本部の設置による指揮・調整体制強化、追加資機材・人員要請判断、現場安全確保と住民救助の両立訓練	現場安全再評価後、追加資機材・人員要請と現場指揮本部設置による指揮命令系統の強化。関係機関連携・現場状況変化への即応力強化が訓練ポイント。	現場指揮本部の設置と指揮系統の明確化、追加救助隊・資機材の迅速な派遣要請、現場安全状況の継続的評価、住民・関係機関への情報共有、救助要請住民の優先順位付け、警察・自衛隊等との連携強化。	追加資機材・人員到着までの救助活動制限、現場指揮系統の混乱防止、関係機関連携の遅れ、住民・隊員の安全確保、通信手段の維持	3.0m前後の浸水が住宅1階全体・屋根上避難が継続（24時間以上継続予想）	住宅被害（床上浸水・屋根上避難）・住民孤立・救助活動再開準備	住宅1階全体が浸水し、住民は2階や屋根上に避難。救助活動は現場安全確保のため一時中断中だが、追加救助隊・資機材の到着と現場指揮本部設置により、救助活動再開の準備が進められている。住民の中には体調不良や移動困難者も含まれる。	現場安全確保（立入規制・流木除去）、追加資機材・人員の迅速派遣、現場指揮本部設置による指揮系統強化、救助手段の多様化、住民への状況説明と安心確保、危険区域の立入制限、関係機関との情報共有・連携	平成30年7月豪雨（西日本豪雨）で淀川流域の低地住宅地にて同様の床上浸水・屋根上避難・孤立事例多数。岡山県真備町等で救助活動中の流木衝突事故や現場隊員の安全確保が課題となった。	['住宅の床上浸水による住民の孤立・生命危険', '流木・瓦礫による救助活動中の隊員・住民の負傷', '屋根上避難者の健康悪化・転落リスク', '救助活動の一時中断・遅延']	['地域の長期的孤立化', '感染症・衛生環境の悪化', '救助活動中の二次災害（流れの強い水中での事故・資機材損壊）']
		1-12	405.363	発災から58分	救助活動再開と住民への現場状況説明	消防	○○付近（住所：枚方市楠葉並木一丁目25、UTM座標：〇〇〇〇〇〇）の住宅地で、追加の救助ボート・資機材が到着し、現場指揮本部の指示のもと救助活動が再開された。現場では複数の住民が屋根上や2階で待機しており、現場隊員より住民への状況説明と安心確保のための声掛けを実施中。	現場は流木・瓦礫の漂流が続いており、救助活動は安全確認を徹底しながら段階的に実施。警察・自衛隊とも連携中。道路名を聞かれた場合：「路線番号は不明ですが、淀川沿いの住宅地です」。	標高約10.6m、極めて緩やかな傾斜（0.4%）の低地。淀川堤防に近接し、氾濫水が直接流入しやすい。住宅地全体で排水困難・孤立化リスクが非常に高い。流木や瓦礫の漂流も多発しやすい地形。	現場指揮本部主導による救助活動再開、住民への状況説明・安心確保、関係機関との連携強化訓練	現場安全対策を講じたうえでの救助活動再開段階。追加資機材・人員投入後、指揮命令系統のもとで住民救助を効率的に進める。住民への状況説明や安心確保のコミュニケーションも重視。	現場指揮本部の指示に基づく救助活動の再開、住民への状況説明・声掛け、要配慮者の優先救助、現場安全確認の継続、関係機関（警察・自衛隊・自治体）との連携強化、救助活動の進捗報告。	流木・瓦礫による救助活動の危険、住民の不安増大、追加資機材の運用調整、現場指揮系統の混乱防止、通信手段維持の困難	3.0m前後の浸水が住宅1階全体・屋根上避難が継続（24時間以上継続予想）	住宅被害（床上浸水・屋根上避難）・住民孤立・救助活動再開	住宅1階全体が浸水し、住民は2階や屋根上に避難。現場指揮本部の設置・追加資機材の到着により、救助活動が再開。住民の中には体調不良や移動困難者も含まれ、現場では住民への状況説明や安心確保のための声掛けが行われている。	現場安全確保（立入規制・流木除去）、追加資機材・人員の迅速運用、現場指揮本部による指揮系統強化、住民への状況説明・安心確保、要配慮者の優先救助、危険区域の立入制限、関係機関との情報共有・連携	平成30年7月豪雨（西日本豪雨）で淀川流域の低地住宅地にて同様の床上浸水・屋根上避難・孤立事例多数。岡山県真備町等で救助活動再開時の現場安全管理や住民対応が課題となった。	['住宅の床上浸水による住民の孤立・生命危険', '流木・瓦礫による救助活動中の隊員・住民の負傷', '屋根上避難者の健康悪化・転落リスク', '救助活動中の現場混乱・指揮系統の乱れ']	['地域の長期的孤立化', '感染症・衛生環境の悪化', '救助活動中のさらなる二次災害（流れの強い水中での事故・資機材損壊）']
		1-13	405.363	発災から63分	住民救助の継続と現場医療対応開始	消防	○○付近（住所：枚方市楠葉並木一丁目25、UTM座標：〇〇〇〇〇〇）の住宅地で、追加の救助ボート・資機材が到着し、現場指揮本部の指示のもと複数の住民の救助活動が継続中。救出された住民の一部に体調不良（低体温症や脱水症状等）が見られ、現場で応急手当班による医療対応が開始された。	救助対象住民には高齢者や持病持ちが含まれている。医療機関・警察・自衛隊とも情報共有済み。道路名を聞かれた場合：「路線番号は不明ですが、淀川沿いの住宅地です」。	標高約10.6m、極めて緩やかな傾斜（0.4%）の低地。淀川堤防に近接し、氾濫水が直接流入しやすい。住宅地全体で排水困難・孤立化リスクが非常に高い。流木や瓦礫の漂流も多発しやすい地形。	住民救助活動の実動訓練と現場応急医療対応、要配慮者の救命優先、関係機関連携の強化、救助後の住民ケア体制の確認	救助活動再開後、住民の救出が順次進行し、救助後の現場応急手当や医療搬送判断が必要となる段階。高齢者・要配慮者への現場医療対応や、救助活動と医療体制の連携強化が訓練のポイント。	救助活動の継続・進捗管理、救出住民の健康状態確認と応急手当、要配慮者の医療機関搬送判断、現場安全確認、警察・自衛隊・医療機関との連携、住民への状況説明・安心確保、救助活動記録・報告	救助住民の健康悪化や搬送遅延、現場医療資機材の不足、救助活動中の安全確保、住民のパニックや不安拡大、通信手段の維持、関係機関連携の遅れ	3.0m前後の浸水が住宅1階全体・屋根上避難が継続（24時間以上継続予想）	住宅被害（床上浸水・屋根上避難）・住民孤立・救助活動・現場医療対応	住宅1階全体が浸水し、住民は2階や屋根上に避難。救助活動再開後、順次住民が救出されているが、長時間の孤立や浸水による体調不良（低体温症・脱水・持病悪化）が複数発生。現場での応急手当や医療搬送が必要となっている。	早期避難指示・勧告、要支援者リストによる個別支援、現場応急手当班の配置、医療機関との連携体制強化、救助活動中の安全管理、住民への状況説明・安心確保、関係機関との情報共有・連携	平成30年7月豪雨（西日本豪雨）岡山県真備町で床上浸水・屋根上避難・孤立住民の救助後、現場での応急手当や医療搬送が多数発生した事例あり。	['住宅の床上浸水による住民の孤立・生命危険', '救助住民の体調悪化・低体温症・持病の急変', '救助活動中の隊員・住民の負傷']	['感染症・衛生環境の悪化', '救助活動中のさらなる二次災害（流木衝突・感電等）', '医療搬送の遅延による健康被害']
		1-14	405.363	発災から69分	現場救助活動の最終段階と住民の医療機関搬送調整	消防	○○付近（住所：枚方市楠葉並木一丁目25、UTM座標：〇〇〇〇〇〇）の住宅地で、救助活動が最終段階に入り、応急手当を受けた住民のうち体調不良や持病の悪化が認められる複数名について、現場から医療機関への搬送調整が始まった。搬送には救急車および必要に応じてドクターヘリの活用も検討されている。	搬送対象住民には高齢者・持病持ち・低体温症の方が含まれる。現場救護所から医療機関までの搬送ルート確保が課題。警察・自衛隊・医療機関と連携中。道路名を聞かれた場合：「路線番号は不明ですが、淀川沿いの住宅地です」。	標高約10.6m、極めて緩やかな傾斜（0.4%）の低地。淀川氾濫流が直接流入しやすく、住宅地全体で排水困難・孤立化リスクが非常に高い。高台や迂回路がほぼなく、救助・搬送経路の確保が課題となる。	広域搬送体制の訓練、医療機関との連携、搬送優先順位判断、現場～搬送先間の情報伝達・調整の実践	現場応急手当後の住民広域搬送段階。救助活動の終息に向けて、医療機関との連携・搬送ルート確保・搬送優先順位判断・現場～搬送先間の情報共有が訓練のポイント。	搬送対象者の優先順位付け、救急車・ドクターヘリ等の搬送手段調整、搬送ルートの安全確認、現場から医療機関への情報連携、住民・家族への説明、搬送記録の作成、関係機関との連携強化。	搬送対象者多数による優先順位判断の難しさ、搬送ルートの冠水・障害物による遅延、救急車・ヘリの運用調整、医療機関の受入体制調整、住民・家族の不安増大、現場と搬送先間の情報伝達遅延	3.0m前後の浸水が住宅1階全体・屋根上避難が継続（24時間以上継続予想）	住宅被害（床上浸水・屋根上避難）・住民孤立・救助活動・広域医療搬送	住宅1階全体が浸水し、住民は2階や屋根上に避難。救助活動再開後、順次住民が救出され、現場応急手当班による医療対応が行われているが、体調不良や持病悪化、低体温症等で医療機関への広域搬送が必要な住民が多数発生。救急車・ドクターヘリ等による搬送が順次行われている。	早期避難指示・勧告、要支援者リストによる個別支援、現場応急手当班・医療機関との連携体制強化、搬送ルートの事前確保・安全確認、搬送優先順位判断基準の整備、住民・家族への説明体制強化、関係機関との情報共有・連携	平成30年7月豪雨（西日本豪雨）岡山県真備町で床上浸水・屋根上避難・孤立住民の救助後、現場からの広域医療搬送が多数発生し、搬送ルートの冠水・渋滞・現場～搬送先間の連携が課題となった事例あり。	['住宅の床上浸水による住民の孤立・生命危険', '救助住民の体調悪化・低体温症・持病の急変', '搬送中の体調急変・搬送遅延']	['感染症・衛生環境の悪化', '搬送ルートの冠水・障害物による遅延', '医療機関の受入超過・連携遅延']
		1-15	405.363	発災から73分	救助活動終息に向けた現場撤収準備と残留住民の安否確認	消防	○○付近（住所：枚方市楠葉並木一丁目25、UTM座標：〇〇〇〇〇〇）の住宅地で、救助活動がほぼ完了し、現場指揮本部から『現地に残る住民の安否確認と、救助隊・資機材の安全な撤収準備を開始する』との通達。現場では一部住民の所在確認が続いているが、多数の住民は既に搬送・避難済み。	安否不明住民の中には連絡が取れない方が数名含まれる。警察・自衛隊・医療機関と引き続き連携。道路名を聞かれた場合：「路線番号は不明ですが、淀川沿いの住宅地です」。	標高約10.6m、極めて緩やかな傾斜（0.4%）の低地。淀川氾濫流が直接流入しやすく、住宅地全体で排水困難・孤立化リスクが非常に高い。高台や迂回路がほぼなく、救助・撤収経路の確保が課題となる。	救助活動終息段階での住民安否確認・行方不明者捜索、現場撤収判断、関係機関連携体制の確認訓練	救助活動の終息に伴い、全住民の安否確認・行方不明者捜索、現場隊員・資機材の安全な撤収を段階的に進める。現場指揮本部・関係機関の連携・情報共有が重要な訓練ポイント。	残る住民の安否確認、行方不明者の捜索・情報収集、現場資機材の撤収準備、関係機関との撤収調整、住民・家族への状況説明、撤収後の現場安全管理（立入規制等）、活動記録・報告作成。	安否不明住民の捜索難航、現場撤収中の安全確保、資機材損耗・紛失、住民・家族の不安増大、現場と本部間の情報伝達遅延	3.0m前後の浸水が住宅1階全体・屋根上避難が継続（24時間以上継続予想）	住宅被害（床上浸水・屋根上避難）・住民孤立・救助活動終息・安否確認・現場撤収	住宅1階全体が長時間浸水し、住民は2階や屋根上に避難していた。救助活動・広域搬送がほぼ完了し、現場では安否不明住民の捜索と残留者の確認、撤収準備が進行中。現場の安全管理と情報共有が重要。	早期避難指示・勧告、要支援者リストによる個別支援、現場応急手当班・医療機関との連携体制強化、撤収時の安全管理、安否確認・行方不明者捜索の徹底、住民・家族への説明体制強化、関係機関との情報共有・連携	平成30年7月豪雨（西日本豪雨）岡山県真備町で床上浸水・屋根上避難・孤立住民の救助活動終息後、安否確認・撤収段階での捜索・情報共有・住民対応が重要課題となった事例あり。	['安否不明住民の生命危険', '撤収作業中の隊員・住民の安全リスク', '現場撤収遅延・資機材損耗']	['感染症・衛生環境の悪化', '住民・家族の不安増大', '現場と本部間の情報伝達遅延']
		1-16	405.363	発災から77分	救助活動の撤収・活動記録整理と住民・家族への最終状況説明	消防	○○付近（住所：枚方市楠葉並木一丁目25、UTM座標：〇〇〇〇〇〇）の住宅地で、救助活動および安否確認がほぼ完了。現場指揮本部より『救助隊・資機材の撤収作業を本格開始し、活動記録の整理と住民・家族への最終状況説明を実施する』との通達。	撤収作業中も住民や家族から状況確認の問い合わせが続いている。警察・自衛隊・医療機関と連携し、最終的な住民名簿・安否リストを整理中。道路名を聞かれた場合：「路線番号は不明ですが、淀川沿いの住宅地です」。	標高約10.6m、極めて緩やかな傾斜（0.4%）の低地。淀川氾濫流が直接流入しやすく、住宅地全体で排水困難・孤立化リスクが非常に高い。高台や迂回路がほぼなく、救助・撤収経路の確保が課題となる。	救助活動終息後の撤収・記録整理、住民・家族への説明体制、現場の安全管理・情報共有の確認訓練	救助活動が完全に終息し、撤収・記録整理・住民対応の最終段階。住民・家族への説明や現場安全管理、関係機関連携の確認が訓練ポイント。	撤収作業の安全管理、資機材の点検・整理、住民・家族への最終説明・状況報告、安否確認リストの確定・共有、現場の立入規制・安全措置、活動記録・報告書の作成、関係機関との最終調整。	撤収作業中の事故・負傷、資機材の紛失・損傷、住民・家族への説明対応の遅延、安否確認リストの整合性確保、現場と本部間の情報伝達遅延	3.0m前後の浸水が住宅1階全体・屋根上避難が継続（24時間以上継続予想）	住宅被害（床上浸水・屋根上避難）・住民孤立・救助活動終息・撤収・記録整理	住宅1階全体が長時間浸水し、住民は2階や屋根上に避難していた。救助活動・広域搬送・安否確認が完了し、現場では資機材撤収・記録整理・住民対応が進行中。現場の安全管理と住民・家族への説明が中心課題。	撤収時の安全管理、活動記録の正確な作成、住民・家族への説明体制強化、安否確認リストの整合性確保、関係機関との情報共有・連携、現場の立入規制・安全措置	平成30年7月豪雨（西日本豪雨）岡山県真備町で床上浸水・屋根上避難・孤立住民の救助活動終息後、撤収・記録整理・住民対応が重要課題となった事例あり。	['撤収作業中の隊員・住民の安全リスク', '資機材の紛失・損傷', '住民・家族への説明対応の遅延']	['感染症・衛生環境の悪化', '住民・家族の不安増大', '現場と本部間の情報伝達遅延']
		1-17	405.363	発災から84分	現場活動の最終確認・資機材撤収の最終段階	消防	○○付近（住所：枚方市楠葉並木一丁目25、UTM座標：〇〇〇〇〇〇）の住宅地で、現場指揮本部より『救助活動・安否確認が完了し、資機材の撤収・活動記録の最終確認を実施する』との通達。現場では住民・家族への最終状況説明や、警察・自衛隊・医療機関など関係機関との撤収タイミングの調整も進行中。	撤収作業はほぼ完了しつつあるが、住民や家族から状況確認の問い合わせが続いている。警察・自衛隊・医療機関と連携し、最終的な住民名簿・安否リストを整理中。道路名を聞かれた場合：「路線番号は不明ですが、淀川沿いの住宅地です」。	標高約10.6m、極めて緩やかな傾斜（0.4%）の低地。淀川氾濫流が直接流入しやすく、住宅地全体で排水困難・孤立化リスクが非常に高い。高台や迂回路がほぼなく、救助・撤収経路の確保が課題となる。	救助活動終息後の撤収・記録整理・関係機関との調整、住民・家族への最終説明体制の確認訓練	現場活動がほぼ完了し、撤収に向けた最終調整・関係機関との引き継ぎ・住民説明を実施する段階。現場管理や情報伝達の正確性、関係機関連携の確認が訓練ポイント。	撤収作業の安全管理・最終点検、資機材の整理・搬出、活動記録・安否確認リストの確定、警察・自衛隊・医療機関との撤収・現場管理の調整、住民・家族への最終説明・状況報告、現場立入規制の再確認、活動報告書の作成と本部への提出。	撤収作業中の事故・負傷、資機材の紛失・損傷、関係機関との調整遅延、住民・家族への説明対応の遅れ、安否確認リストや活動記録の整合性確保、現場と本部間の情報伝達遅延	3.0m前後の浸水が住宅1階全体・屋根上避難が継続（24時間以上継続予想）	住宅被害（床上浸水・屋根上避難）・住民孤立・救助活動終息・撤収・記録整理	住宅1階全体が長時間浸水し、住民は2階や屋根上に避難していた。救助活動・広域搬送・安否確認が完了し、現場では資機材撤収・記録整理・住民対応が進行中。現場の安全管理と住民・家族への説明が中心課題。	撤収時の安全管理、活動記録の正確な作成、住民・家族への説明体制強化、安否確認リストの整合性確保、関係機関との情報共有・連携、現場の立入規制・安全措置	平成30年7月豪雨（西日本豪雨）岡山県真備町で床上浸水・屋根上避難・孤立住民の救助活動終息後、撤収・記録整理・住民対応が重要課題となった事例あり。	['撤収作業中の隊員・住民の安全リスク', '資機材の紛失・損傷', '住民・家族への説明対応の遅延']	['感染症・衛生環境の悪化', '住民・家族の不安増大', '現場と本部間の情報伝達遅延']
		1-18	405.363	発災から87分	現場活動の完全終了・現場閉鎖と関係機関への引継ぎ	消防	○○付近（住所：枚方市楠葉並木一丁目25、UTM座標：〇〇〇〇〇〇）の住宅地で、現場指揮本部より『すべての救助・安否確認・資機材撤収作業が完了し、現場は閉鎖。今後は関係機関への現場管理の引継ぎと、住民・家族への最終状況説明を実施する』との通達。	撤収後も住民や家族からの問い合わせが断続的に続いているため、問い合わせ窓口を継続設置。警察・自衛隊・医療機関と最終的な現場管理の引継ぎ調整を行う。道路名を聞かれた場合：「路線番号は不明ですが、淀川沿いの住宅地です」。	標高約10.6m、極めて緩やかな傾斜（0.4%）の低地。淀川氾濫流が直接流入しやすく、住宅地全体で排水困難。高台や迂回路がほぼなく、孤立化リスクが非常に高い。	救助・撤収作業の完全終息と現場閉鎖、現場管理の円滑な引継ぎ、住民・家族への最終説明体制訓練	全作業完了後の現場閉鎖・管理引継ぎ。住民・家族への説明、問い合わせ対応、関係機関間の連携・情報共有の最終確認が訓練ポイント。	現場閉鎖の宣言、現場管理の関係機関（警察・自衛隊等）への正式な引継ぎ、問い合わせ窓口の設置・運用、住民・家族への最終状況説明、活動記録・報告書の本部提出、現場立入規制の維持。	現場閉鎖後の住民・家族からの問い合わせ対応遅延、現場管理引継ぎの不備、資機材や記録の紛失、現場立入規制の徹底不足、関係機関間の情報伝達の行き違い	3.0m前後の浸水が住宅1階全体・屋根上避難が継続（24時間以上継続予想）	住宅被害（床上浸水・屋根上避難）・住民孤立・救助活動終息・撤収・現場閉鎖	住宅1階全体が長時間浸水し、住民は2階や屋根上に避難していた。救助・搬送・安否確認・撤収作業が全て完了し、現場は閉鎖。今後は現場管理の関係機関への引継ぎと住民・家族への最終説明が必要。	撤収時の安全管理、現場管理の正式な引継ぎ体制、住民・家族への説明体制強化、問い合わせ窓口の設置、活動記録の正確な提出、現場立入規制の徹底、関係機関との情報共有	平成30年7月豪雨（西日本豪雨）岡山県真備町で床上浸水・屋根上避難・孤立住民の救助活動終息後、現場閉鎖・管理引継ぎ・住民対応が重要課題となった事例あり。	['現場閉鎖後の管理不備による安全リスク', '住民・家族への説明対応の遅延', '現場立入規制の徹底不足']	['感染症・衛生環境の悪化', '住民・家族の不安増大', '現場と本部間の情報伝達遅延']
		1-19	405.363	発災から93分	現場閉鎖後の住民・家族からの問い合わせと最終対応	住民	○○付近（住所：枚方市楠葉並木一丁目25、UTM座標：〇〇〇〇〇〇）に住む家族や親族から、『避難した家族の所在が分からない』『現場の安全状況や立入可能か教えてほしい』などの問い合わせが災害対策本部や現場管理窓口に寄せられている。	現場管理は消防から警察・自治体に引き継がれており、問い合わせ窓口は市役所災害対策本部で継続運用中。避難所や安否確認リストは本部で一元管理。現場の立入は規制中。	標高約10.6m、極めて緩やかな傾斜（0.4%）の低地。淀川氾濫流が直接流入しやすく、住宅地全体で排水困難。高台や迂回路がほぼなく、孤立化リスクが非常に高い。	現場閉鎖後の住民・家族対応、問い合わせ窓口運用訓練、安否確認リスト・避難所情報の一元管理・情報伝達体制の確認	救助・撤収作業が全て完了し現場閉鎖後、住民や家族から問い合わせが継続的に発生する状況を想定。問い合わせ窓口の設置・運用や、安否確認リスト・避難所情報の一元管理・情報伝達が訓練のポイント。	問い合わせ窓口での丁寧な対応、安否確認リストや避難所情報の確認・案内、現場立入規制や安全状況の説明、問い合わせ内容の記録、必要に応じて関係機関への連絡・調整。	問い合わせ件数の増加による対応遅延、情報伝達の行き違い、現場閉鎖後の立入希望者対応、安否確認リストの整合性維持、住民・家族の不安や混乱の拡大	3.0m前後の浸水が住宅1階全体・屋根上避難が継続（24時間以上継続予想）	住宅被害（床上浸水・屋根上避難）・住民孤立・現場閉鎖後の住民対応	住宅1階全体が長時間浸水し、住民は2階や屋根上に避難していた。救助・搬送・安否確認・撤収作業が全て完了し現場は閉鎖されたが、住民や家族からの安否や現場状況に関する問い合わせが続いている。現場管理は関係機関へ引継ぎ済み。	撤収後の問い合わせ窓口設置・運用、安否確認リスト・避難所情報の一元管理、現場立入規制の徹底、住民・家族への丁寧な説明体制、関係機関との情報共有、活動記録・問い合わせ記録の整備	平成30年7月豪雨（西日本豪雨）岡山県真備町などで、救助活動終息・現場閉鎖後も住民や家族からの問い合わせが殺到し、安否確認・情報提供体制の整備が課題となった事例あり。	['現場閉鎖後の管理不備による安全リスク', '住民・家族への説明対応の遅延', '安否確認リストの整合性不備']	['住民・家族の不安増大', '現場立入規制の徹底不足', '現場と本部間の情報伝達遅延']
		1-20	405.363	発災から97分	現場閉鎖後の避難所・安否確認窓口への住民・家族からの問い合わせ続発	住民	○○付近（住所：枚方市楠葉並木一丁目25、UTM座標：〇〇〇〇〇〇）の家族や親族から、『避難した家族の安否や居場所が分からない』『避難所で会えない』『現場の安全状況や立入可能か教えてほしい』などの問い合わせが災害対策本部や避難所運営窓口に相次いで寄せられている。	現場管理は消防から警察・自治体に既に引き継ぎ済み。問い合わせ窓口は市役所災害対策本部で継続運用中。避難所や安否確認リストは本部で一元管理。現場の立入は引き続き規制中。	標高約10.6m、極めて緩やかな傾斜（0.4%）の低地。淀川氾濫流が直接流入しやすく、住宅地全体で排水困難。高台や迂回路がほぼなく、孤立化リスクが非常に高い。	現場閉鎖後の住民・家族対応、問い合わせ窓口運用訓練、安否確認リスト・避難所情報の一元管理・情報伝達体制の確認	救助・撤収作業が全て完了し現場閉鎖後、住民や家族から問い合わせが継続的に発生する状況。問い合わせ窓口の設置・運用や、安否確認リスト・避難所情報の一元管理・情報伝達が訓練のポイント。	問い合わせ窓口での丁寧な対応、安否確認リストや避難所情報の確認・案内、現場立入規制や安全状況の説明、問い合わせ内容の記録、必要に応じて関係機関への連絡・調整。	問い合わせ件数の増加による対応遅延、情報伝達の行き違い、現場閉鎖後の立入希望者対応、安否確認リストの整合性維持、住民・家族の不安や混乱の拡大	3.0m前後の浸水が住宅1階全体・屋根上避難が継続（24時間以上継続予想）	住宅被害（床上浸水・屋根上避難）・住民孤立・現場閉鎖後の住民対応	住宅1階全体が長時間浸水し、住民は2階や屋根上に避難していた。救助・搬送・安否確認・撤収作業が全て完了し現場は閉鎖されたが、住民や家族からの安否や現場状況に関する問い合わせが続いている。現場管理は関係機関へ引継ぎ済み。	撤収後の問い合わせ窓口設置・運用、安否確認リスト・避難所情報の一元管理、現場立入規制の徹底、住民・家族への丁寧な説明体制、関係機関との情報共有、活動記録・問い合わせ記録の整備	平成30年7月豪雨（西日本豪雨）岡山県真備町などで、救助活動終息・現場閉鎖後も住民や家族からの問い合わせが殺到し、安否確認・情報提供体制の整備が課題となった事例あり。	['現場閉鎖後の管理不備による安全リスク', '住民・家族への説明対応の遅延', '安否確認リストの整合性不備']	['住民・家族の不安増大', '現場立入規制の徹底不足', '現場と本部間の情報伝達遅延']
		1-21	405.363	発災から103分	現場閉鎖後の安否確認リスト・避難所情報の再照合および問い合わせ対応	自治体職員	○○付近（住所：枚方市楠葉並木一丁目25、UTM座標：〇〇〇〇〇〇）の現場閉鎖後、災害対策本部や問い合わせ窓口に『避難した家族の安否や居場所が分からない』『避難所で会えない』などの問い合わせが引き続き寄せられている。安否確認リストや避難所名簿との照合・再整理を進めている。	現場管理は既に消防から警察・自治体に引き継がれており、問い合わせ窓口は市役所災害対策本部で継続運用中。避難所や安否確認リストは本部で一元管理。現場の立入は引き続き規制中。新たな避難所来所住民の情報もあり。	標高約10.6m、極めて緩やかな傾斜（0.4%）の低地。淀川氾濫流が直接流入しやすく、住宅地全体で排水困難。高台や迂回路がほぼなく、孤立化リスクが非常に高い。	現場閉鎖後の住民・家族対応、問い合わせ窓口体制の運用訓練、避難所名簿・安否確認リストの整合・再整理、住民・家族への説明体制強化	救助・撤収・現場閉鎖後も住民や家族からの問い合わせが継続。問い合わせ窓口の運用、名簿・安否確認リストの一元管理・整合性確保、住民・家族への説明・安心確保が訓練のポイント。	問い合わせ窓口での丁寧な対応、安否確認リストや避難所情報の照合・案内、現場立入規制や安全状況の説明、問い合わせ内容の記録、名簿不一致時の追加確認・調整、必要に応じて関係機関への連絡・調整。	問い合わせ件数の増加による対応遅延、名簿と安否確認リストの不一致・照合遅延、情報伝達の行き違い、現場閉鎖後の立入希望者対応、住民・家族の不安や混乱の拡大	3.0m前後の浸水が住宅1階全体・屋根上避難が継続（24時間以上継続予想）	住宅被害（床上浸水・屋根上避難）・住民孤立・現場閉鎖後の住民対応	住宅1階全体が長時間浸水し、住民は2階や屋根上に避難していた。救助・搬送・安否確認・撤収作業が全て完了し現場は閉鎖されたが、住民や家族からの安否や現場状況に関する問い合わせが続いている。避難所への新規来所住民もあり、名簿・安否確認リストの照合が必要。	撤収後の問い合わせ窓口設置・運用、安否確認リスト・避難所情報の一元管理、現場立入規制の徹底、住民・家族への丁寧な説明体制、名簿・リストの整合性確保、関係機関との情報共有、活動記録・問い合わせ記録の整備	平成30年7月豪雨（西日本豪雨）岡山県真備町などで、救助活動終息・現場閉鎖後も住民や家族からの問い合わせが殺到し、安否確認・情報提供体制の整備が課題となった事例あり。	['現場閉鎖後の管理不備による安全リスク', '住民・家族への説明対応の遅延', '名簿・安否確認リストの整合性不備']	['住民・家族の不安増大', '現場立入規制の徹底不足', '現場と本部間の情報伝達遅延']
		1-22	405.363	発災から109分	現場閉鎖後の問い合わせ内容の追加整理と避難所情報の再確認（続報）	自治体職員	○○付近（住所：枚方市楠葉並木一丁目25、UTM座標：〇〇〇〇〇〇）の現場閉鎖後、災害対策本部や問い合わせ窓口に引き続き『避難した家族の安否や居場所が分からない』『避難所で会えない』『新たに避難所に到着した住民の情報がある』などの問い合わせ・追加情報が寄せられている。避難所名簿・安否確認リストとの照合・再整理を継続中。	現場管理は既に消防から警察・自治体に引き継がれており、問い合わせ窓口は市役所災害対策本部で継続運用中。現場の立入は引き続き規制中。避難所には新たな住民の追加来所情報もあり。避難所間の移動や名簿記載漏れも確認されている。	標高約10.6m、極めて緩やかな傾斜（0.4%）の低地。淀川氾濫流が直接流入しやすく、住宅地全体で排水困難。高台や迂回路がほぼなく、孤立化リスクが非常に高い。	現場閉鎖後の住民・家族対応、問い合わせ窓口運用訓練、避難所名簿・安否確認リストの整合・再整理、住民・家族への説明体制強化	救助・撤収・現場閉鎖後も住民や家族からの問い合わせが継続。問い合わせ窓口の運用、名簿・安否確認リストの一元管理・整合性確保、住民・家族への説明・安心確保、避難所間移動や新規来所情報の追加整理が訓練のポイント。	問い合わせ窓口での丁寧な対応、安否確認リストや避難所情報の照合・案内、現場立入規制や安全状況の説明、問い合わせ内容の記録、名簿不一致時の追加確認・調整、避難所間の情報共有、必要に応じて関係機関への連絡・調整。	問い合わせ件数の増加による対応遅延、名簿と安否確認リストの不一致・照合遅延、避難所間の情報共有不足、情報伝達の行き違い、現場閉鎖後の立入希望者対応、住民・家族の不安や混乱の拡大	3.0m前後の浸水が住宅1階全体・屋根上避難が継続（24時間以上継続予想）	住宅被害（床上浸水・屋根上避難）・住民孤立・現場閉鎖後の住民対応	住宅1階全体が長時間浸水し、住民は2階や屋根上に避難していた。救助・搬送・安否確認・撤収作業が全て完了し現場は閉鎖されたが、住民や家族からの安否や現場状況に関する問い合わせが続いている。避難所への新規来所住民もあり、名簿・安否確認リストの照合が必要。避難所間の移動や名簿記載漏れも発生している。	撤収後の問い合わせ窓口設置・運用、安否確認リスト・避難所情報の一元管理、現場立入規制の徹底、住民・家族への丁寧な説明体制、名簿・リストの整合性確保、避難所間の情報共有体制強化、関係機関との情報共有、活動記録・問い合わせ記録の整備	平成30年7月豪雨（西日本豪雨）岡山県真備町などで、救助活動終息・現場閉鎖後も住民や家族からの問い合わせが殺到し、安否確認・情報提供体制の整備や避難所間の情報共有が課題となった事例あり。	['現場閉鎖後の管理不備による安全リスク', '住民・家族への説明対応の遅延', '名簿・安否確認リストの整合性不備', '避難所間の情報共有不足']	['住民・家族の不安増大', '現場立入規制の徹底不足', '現場と本部間の情報伝達遅延']
		1-23	405.363	発災から115分	現場閉鎖後の問い合わせ内容の追加整理・避難所情報の再照合（続報）	自治体職員	○○付近（住所：枚方市楠葉並木一丁目25、UTM座標：〇〇〇〇〇〇）の現場閉鎖後、災害対策本部や問い合わせ窓口に引き続き『避難した家族の安否や居場所が分からない』『避難所で会えない』『避難所に新たに到着した住民の情報がある』等の問い合わせや追加情報が寄せられている。避難所名簿や安否確認リストとの照合・再整理を続行中。	現場管理は既に消防から警察・自治体に引き継がれている。問い合わせ窓口は市役所災害対策本部で運用中。避難所には新たな住民の追加来所情報もあり、避難所間の移動や名簿記載漏れも散見されている。	標高約10.6m、極めて緩やかな傾斜（0.4%）の低地。淀川氾濫流が直接流入しやすく、住宅地全体で排水困難。高台や迂回路がほぼなく、孤立化リスクが非常に高い。	現場閉鎖後の住民・家族対応、問い合わせ窓口運用訓練、避難所名簿・安否確認リストの整合・再整理、住民・家族への説明体制強化	救助・撤収・現場閉鎖後も住民や家族からの問い合わせが継続。問い合わせ窓口の運用、名簿・安否確認リストの一元管理・整合性確保、住民・家族への説明・安心確保、避難所間移動や新規来所情報の追加整理が訓練のポイント。	問い合わせ窓口での丁寧な対応、安否確認リストや避難所情報の照合・案内、現場立入規制や安全状況の説明、問い合わせ内容の記録、名簿不一致時の追加確認・調整、避難所間の情報共有、必要に応じて関係機関への連絡・調整。	問い合わせ件数の増加による対応遅延、名簿と安否確認リストの不一致・照合遅延、避難所間の情報共有不足、情報伝達の行き違い、現場閉鎖後の立入希望者対応、住民・家族の不安や混乱の拡大	3.0m前後の浸水が住宅1階全体・屋根上避難が継続（24時間以上継続予想）	住宅被害（床上浸水・屋根上避難）・住民孤立・現場閉鎖後の住民対応	住宅1階全体が長時間浸水し、住民は2階や屋根上に避難していた。救助・搬送・安否確認・撤収作業が全て完了し現場は閉鎖されたが、住民や家族からの安否や現場状況に関する問い合わせが続いている。避難所への新規来所住民もあり、名簿・安否確認リストの照合が必要。避難所間の移動や名簿記載漏れも発生している。	撤収後の問い合わせ窓口設置・運用、安否確認リスト・避難所情報の一元管理、現場立入規制の徹底、住民・家族への丁寧な説明体制、名簿・リストの整合性確保、避難所間の情報共有体制強化、関係機関との情報共有、活動記録・問い合わせ記録の整備	平成30年7月豪雨（西日本豪雨）岡山県真備町などで、救助活動終息・現場閉鎖後も住民や家族からの問い合わせが殺到し、安否確認・情報提供体制の整備や避難所間の情報共有が課題となった事例あり。	['現場閉鎖後の管理不備による安全リスク', '住民・家族への説明対応の遅延', '名簿・安否確認リストの整合性不備', '避難所間の情報共有不足']	['住民・家族の不安増大', '現場立入規制の徹底不足', '現場と本部間の情報伝達遅延']
		1-24	405.363	発災から119分	現場閉鎖後の問い合わせ内容の最終整理と避難所情報の再照合（続報）	自治体職員	○○付近（住所：枚方市楠葉並木一丁目25、UTM座標：〇〇〇〇〇〇）の現場閉鎖後、災害対策本部や問い合わせ窓口に引き続き『避難した家族の安否や居場所が分からない』『避難所で会えない』『避難所に新たに到着した住民の情報がある』等の問い合わせや追加情報が寄せられている。避難所名簿や安否確認リストとの照合・再整理を続行中。	現場管理は既に消防から警察・自治体に引き継がれている。問い合わせ窓口は市役所災害対策本部で運用中。避難所には新たな住民の追加来所情報もあり、避難所間の移動や名簿記載漏れも散見されている。	標高約10.6m、極めて緩やかな傾斜（0.4%）の低地。淀川氾濫流が直接流入しやすく、住宅地全体で排水困難。高台や迂回路がほぼなく、孤立化リスクが非常に高い。	現場閉鎖後の住民・家族対応、問い合わせ窓口運用訓練、避難所名簿・安否確認リストの整合・再整理、住民・家族への説明体制強化	救助・撤収・現場閉鎖後も住民や家族からの問い合わせが継続。問い合わせ窓口の運用、名簿・安否確認リストの一元管理・整合性確保、住民・家族への説明・安心確保、避難所間移動や新規来所情報の追加整理が訓練のポイント。	問い合わせ窓口での丁寧な対応、安否確認リストや避難所情報の照合・案内、現場立入規制や安全状況の説明、問い合わせ内容の記録、名簿不一致時の追加確認・調整、避難所間の情報共有、必要に応じて関係機関への連絡・調整。	問い合わせ件数の増加による対応遅延、名簿と安否確認リストの不一致・照合遅延、避難所間の情報共有不足、情報伝達の行き違い、現場閉鎖後の立入希望者対応、住民・家族の不安や混乱の拡大	3.0m前後の浸水が住宅1階全体・屋根上避難が継続（24時間以上継続予想）	住宅被害（床上浸水・屋根上避難）・住民孤立・現場閉鎖後の住民対応	住宅1階全体が長時間浸水し、住民は2階や屋根上に避難していた。救助・搬送・安否確認・撤収作業が全て完了し現場は閉鎖されたが、住民や家族からの安否や現場状況に関する問い合わせが続いている。避難所への新規来所住民もあり、名簿・安否確認リストの照合が必要。避難所間の移動や名簿記載漏れも発生している。	撤収後の問い合わせ窓口設置・運用、安否確認リスト・避難所情報の一元管理、現場立入規制の徹底、住民・家族への丁寧な説明体制、名簿・リストの整合性確保、避難所間の情報共有体制強化、関係機関との情報共有、活動記録・問い合わせ記録の整備	平成30年7月豪雨（西日本豪雨）岡山県真備町などで、救助活動終息・現場閉鎖後も住民や家族からの問い合わせが殺到し、安否確認・情報提供体制の整備や避難所間の情報共有が課題となった事例あり。	['現場閉鎖後の管理不備による安全リスク', '住民・家族への説明対応の遅延', '名簿・安否確認リストの整合性不備', '避難所間の情報共有不足']	['住民・家族の不安増大', '現場立入規制の徹底不足', '現場と本部間の情報伝達遅延']
		1-25	405.363	発災から124分	現場閉鎖後の問い合わせ内容の最終整理と避難所情報の再照合（追加対応）	自治体職員	○○付近（住所：枚方市楠葉並木一丁目25、UTM座標：〇〇〇〇〇〇）の現場閉鎖後、災害対策本部や問い合わせ窓口に引き続き『避難した家族の安否や居場所が分からない』『避難所で会えない』『新たに避難所に到着した住民の情報がある』『健康状態が不安な高齢者が避難所にいる』等の問い合わせや追加情報が寄せられている。避難所名簿や安否確認リストとの照合・再整理と、健康観察の追加対応を続行中。	現場管理は既に消防から警察・自治体に引き継がれている。問い合わせ窓口は市役所災害対策本部で運用中。避難所には新たな住民の追加来所情報や健康観察要請もあり、避難所間の移動や名簿記載漏れも散見される。健康観察は医療スタッフ増員で対応中。	標高約10.6m、極めて緩やかな傾斜（0.4%）の低地。淀川氾濫流が直接流入しやすく、住宅地全体で排水困難。高台や迂回路がほぼなく、孤立化リスクが非常に高い。	現場閉鎖後の住民・家族対応、問い合わせ窓口運用訓練、避難所名簿・安否確認リストの整合・再整理、住民・家族への説明体制強化、健康観察体制の拡充	救助・撤収・現場閉鎖後も住民や家族からの問い合わせが継続。問い合わせ窓口の運用、名簿・安否確認リストの一元管理・整合性確保、住民・家族への説明・安心確保、避難所間移動や新規来所情報の追加整理、避難所での健康観察体制強化が訓練のポイント。	問い合わせ窓口での丁寧な対応、安否確認リストや避難所情報の照合・案内、現場立入規制や安全状況の説明、問い合わせ内容の記録、名簿不一致時の追加確認・調整、避難所間の情報共有、健康観察の実施と記録、必要に応じて関係機関への連絡・調整。	問い合わせ件数の増加による対応遅延、名簿と安否確認リストの不一致・照合遅延、避難所間の情報共有不足、健康観察の人員・資材不足、情報伝達の行き違い、現場閉鎖後の立入希望者対応、住民・家族の不安や混乱の拡大	3.0m前後の浸水が住宅1階全体・屋根上避難が継続（24時間以上継続予想）	住宅被害（床上浸水・屋根上避難）・住民孤立・現場閉鎖後の住民対応・避難所健康観察	住宅1階全体が長時間浸水し、住民は2階や屋根上に避難していた。救助・搬送・安否確認・撤収作業が全て完了し現場は閉鎖されたが、住民や家族からの安否や現場状況に関する問い合わせが続いている。避難所への新規来所住民もあり、名簿・安否確認リストの照合が必要。避難所では医療スタッフ増員による健康観察体制強化も進行中。避難所間の移動や名簿記載漏れも発生している。	撤収後の問い合わせ窓口設置・運用、安否確認リスト・避難所情報の一元管理、現場立入規制の徹底、住民・家族への丁寧な説明体制、名簿・リストの整合性確保、避難所間の情報共有体制強化、健康観察・医療スタッフの増員、関係機関との情報共有、活動記録・問い合わせ記録の整備	平成30年7月豪雨（西日本豪雨）岡山県真備町などで、救助活動終息・現場閉鎖後も住民や家族からの問い合わせが殺到し、安否確認・情報提供体制や避難所内の健康観察体制の整備が課題となった事例あり。	['現場閉鎖後の管理不備による安全リスク', '住民・家族への説明対応の遅延', '名簿・安否確認リストの整合性不備', '避難所間の情報共有不足', '避難所での健康急変・感染症拡大']	['住民・家族の不安増大', '現場立入規制の徹底不足', '現場と本部間の情報伝達遅延', '避難所内でのパニック・混乱拡大', '医療資材・人員の不足による二次的健康被害']
		1-26	405.363	発災から126分	現場閉鎖後の問い合わせ内容の最終整理・避難所健康観察体制の再点検	自治体職員	○○付近（住所：枚方市楠葉並木一丁目25、UTM座標：〇〇〇〇〇〇）の現場閉鎖後、災害対策本部や問い合わせ窓口に引き続き『避難した家族の安否や居場所が分からない』『避難所で会えない』『避難所に新たに到着した住民の情報がある』『健康状態が不安な高齢者が避難所にいる』等の問い合わせや追加情報が寄せられている。避難所名簿や安否確認リストとの照合・再整理、健康観察体制の再点検を続行中。	避難所には新たな住民の追加来所情報や健康観察要請もあり、避難所間の移動や名簿記載漏れも散見される。健康観察は医療スタッフ増員で対応中。感染症の疑いがある場合は隔離スペースを設置している。	標高約10.6m、極めて緩やかな傾斜（0.4%）の低地。淀川氾濫流が直接流入しやすく、住宅地全体で排水困難。高台や迂回路がほぼなく、孤立化リスクが非常に高い。	現場閉鎖後の住民・家族対応、問い合わせ窓口運用訓練、避難所名簿・安否確認リストの整合・再整理、健康観察体制の拡充、住民・家族への説明体制強化	救助・撤収・現場閉鎖後も住民や家族からの問い合わせが継続。問い合わせ窓口の運用、名簿・安否確認リストの一元管理・整合性確保、避難所健康観察体制強化、避難所間移動や新規来所情報の追加整理が訓練ポイント。感染症疑い時の隔離・衛生管理も重要。	問い合わせ窓口での丁寧な対応、安否確認リストや避難所情報の照合・案内、避難所健康観察の再点検と記録、感染症疑い者の隔離措置、現場立入規制や安全状況の説明、名簿不一致時の追加確認・調整、避難所間の情報共有、必要に応じて関係機関への連絡・調整	問い合わせ件数の増加による対応遅延、名簿と安否確認リストの不一致・照合遅延、避難所間の情報共有不足、健康観察の人員・資材不足、感染症対策の徹底困難、情報伝達の行き違い、現場閉鎖後の立入希望者対応、住民・家族の不安や混乱の拡大	3.0m前後の浸水が住宅1階全体・屋根上避難が継続（24時間以上継続予想）	住宅被害（床上浸水・屋根上避難）・住民孤立・現場閉鎖後の住民対応・避難所健康観察	住宅1階全体が長時間浸水し、住民は2階や屋根上に避難していた。救助・搬送・安否確認・撤収作業が全て完了し現場は閉鎖されたが、住民や家族からの安否や現場状況に関する問い合わせが続いている。避難所への新規来所住民もあり、名簿・安否確認リストの照合が必要。避難所では医療スタッフ増員による健康観察体制強化も進行中。感染症疑い時の隔離スペース設置・衛生管理も実施中。	問い合わせ窓口設置・運用、安否確認リスト・避難所情報の一元管理、現場立入規制の徹底、住民・家族への丁寧な説明体制、名簿・リストの整合性確保、避難所間の情報共有体制強化、健康観察・医療スタッフの増員、感染症対策（隔離・消毒・換気）、関係機関との情報共有、活動記録・問い合わせ記録の整備	平成30年7月豪雨（西日本豪雨）岡山県真備町などで、救助活動終息・現場閉鎖後も住民や家族からの問い合わせが殺到し、安否確認・情報提供体制や避難所内の健康観察体制の整備が課題となった事例あり。感染症疑い者の隔離・衛生管理の遅れが混乱を招いた例も報告されている。	['現場閉鎖後の管理不備による安全リスク', '住民・家族への説明対応の遅延', '名簿・安否確認リストの整合性不備', '避難所間の情報共有不足', '避難所での健康急変・感染症拡大']	['住民・家族の不安増大', '現場立入規制の徹底不足', '現場と本部間の情報伝達遅延', '避難所内でのパニック・混乱拡大', '医療資材・人員の不足による二次的健康被害']
		1-27	405.363	発災から131分	避難所内での夜間体調不良者発生・追加健康観察要請	避難所職員	○○付近（住所：枚方市楠葉並木一丁目25、UTM座標：〇〇〇〇〇〇）の避難所で、夜間に入り発熱や咳、頭痛を訴える住民が新たに1名発生。既存の健康観察体制で即時対応したが、追加の健康観察と隔離スペースの確保が必要との報告が入った。	体調不良者は高齢者1名。夜間のため医療機関への搬送は翌朝以降を検討中。家族は同避難所内に同伴している。自治体本部・医療機関には連絡済み。	標高約10.6m、極めて緩やかな傾斜（0.4%）の低地。淀川氾濫流が直接流入しやすく、住宅地・避難所全体で長時間の排水困難・孤立化リスクが非常に高い。避難所も低地部に立地し、長時間の避難生活による健康リスクが高まる。	避難所運営時の夜間体調急変対応、隔離スペースの運用判断、夜間の医療体制・住民説明・安心確保の訓練	夜間に新規体調不良者が発生し、追加健康観察や隔離スペースの確保が必要な状況。夜間の医療スタッフ対応、住民説明・安心確保、記録管理が訓練ポイント。	夜間の体調不良者への応急対応、隔離スペースの迅速な設置、医療スタッフの夜間対応体制確保、症状者の経過観察記録、住民・家族への状況説明と安心確保、健康観察記録の更新、自治体・医療機関との情報共有。	夜間の人員・医療資材不足、隔離スペースの確保困難、住民・家族の不安拡大、体調不良者の重症化リスク、記録管理や名簿更新の遅延、他住民への感染拡大防止の徹底困難	3.0m前後の浸水が住宅1階全体・屋根上避難が継続（24時間以上継続予想）	避難所運営・健康被害・感染症対策・夜間対応	避難所での長時間滞在・密集状態により体調不良者が新たに発生。既存の隔離スペースが満床となった場合、追加隔離や夜間の医療スタッフ対応体制が急務。住民・家族の不安や混乱も拡大しやすい状況。	夜間も含めた定期的な健康観察・体調管理、感染症対策（隔離・消毒・換気・動線分離）、医療スタッフ・保健師の夜間シフト体制、衛生資材の十分な備蓄・迅速補給、住民説明・安心確保の体制強化、名簿・健康観察記録の徹底	平成30年7月豪雨（西日本豪雨）岡山県真備町などで、避難所内での感染症疑い・健康急変事案が多発し、夜間の医療体制や衛生資材不足、住民説明体制の課題が指摘された。	['避難所内での健康急変・感染症拡大', '体調不良者の重症化・医療搬送遅延', '名簿管理・健康観察の遅延', '住民の不安・混乱拡大']	['避難所内のパニック・不安拡大', '感染症の集団発生による避難所閉鎖リスク', '医療機関の受入超過・連携遅延', '衛生資材不足による二次的健康被害']
		1-28	405.363	発災から136分	避難所内での夜間追加体調不良者発生と隔離・医療体制の逼迫	避難所職員	○○付近（住所：枚方市楠葉並木一丁目25、UTM座標：〇〇〇〇〇〇）の避難所で、夜間の健康観察巡回中に新たに発熱・咳を訴える住民がさらに1名発生。既存の隔離スペースは既に使用中であり、追加の隔離場所や医療スタッフの夜間対応体制が限界に近づいている。	新たな体調不良者は成人女性。家族は同避難所内に同伴しているが、夜間のため医療機関への搬送は翌朝以降を検討。自治体本部・医療機関には追加連絡済み。	標高約10.6m、極めて緩やかな傾斜（0.4%）の低地。淀川氾濫流が直接流入しやすく、住宅地・避難所全体で長時間の排水困難・孤立化リスクが非常に高い。避難所も低地部に立地し、長時間の避難生活による健康リスクが高まる。	避難所運営時の夜間体調急変・隔離体制の限界対応、追加スペース確保・住民説明・医療スタッフ夜間運用の判断訓練	夜間に体調不良者が連続発生し、隔離スペース・医療スタッフとも限界。追加隔離スペースの設営判断、夜間の医療体制維持、住民説明・不安対応、記録管理が訓練ポイント。	夜間の体調不良者への応急対応、追加隔離スペースの即時設営検討、医療スタッフの夜間対応体制調整、症状者の経過観察記録、住民・家族への状況説明と不安対応、名簿・健康観察記録の更新、自治体・医療機関との情報共有。	隔離スペースの物理的限界、夜間の人員・医療資材不足、体調不良者の重症化リスク、住民・家族の不安拡大、夜間の記録管理や名簿更新の遅延、感染拡大防止の徹底困難	3.0m前後の浸水が住宅1階全体・屋根上避難が継続（24時間以上継続予想）	避難所運営・健康被害・感染症対策・夜間対応	避難所での長時間滞在・密集状態により体調不良者が新たに発生。既存の隔離スペースが満床となり、追加隔離や夜間の医療スタッフ対応体制が急務。住民・家族の不安や混乱も拡大しやすい状況。	夜間も含めた定期的な健康観察・体調管理、感染症対策（隔離・消毒・換気・動線分離）、医療スタッフ・保健師の夜間シフト体制、衛生資材の十分な備蓄・迅速補給、住民説明・安心確保の体制強化、名簿・健康観察記録の徹底	平成30年7月豪雨（西日本豪雨）岡山県真備町などで、避難所内での感染症疑い・健康急変事案が多発し、夜間の医療体制や衛生資材不足、住民説明体制の課題が指摘された。	['避難所内での健康急変・感染症拡大', '体調不良者の重症化・医療搬送遅延', '名簿管理・健康観察の遅延', '住民の不安・混乱拡大']	['避難所内のパニック・不安拡大', '感染症の集団発生による避難所閉鎖リスク', '医療機関の受入超過・連携遅延', '衛生資材不足による二次的健康被害']
		1-29	405.363	発災から141分	避難所内での夜間体調不良者増加・隔離スペース拡張判断	避難所職員	○○付近（住所：枚方市楠葉並木一丁目25、UTM座標：〇〇〇〇〇〇）の避難所で、夜間健康観察中に新たに発熱・咳・倦怠感を訴える住民がもう1名発生。既存の隔離スペースは満床となっており、追加隔離スペースの設営を検討中。夜間のため医療機関搬送は翌朝以降を予定し、経過観察と家族の動線分離を実施している。	新たな体調不良者は高齢男性1名。家族は同避難所内に同伴。自治体本部・医療機関には追加連絡済み。夜間のため医療スタッフの対応体制も逼迫。	標高約10.6m、極めて緩やかな傾斜（0.4%）の低地。淀川氾濫流が直接流入しやすく、住宅地・避難所全体で長時間の排水困難・孤立化リスクが非常に高い。避難所も低地部に立地し、長時間の避難生活による健康リスクが高まる。	夜間の避難所運営における体調急変・感染症疑い時の隔離スペース拡張判断、医療スタッフ夜間運用・住民説明・不安対応の訓練	夜間に体調不良者が連続発生し、隔離スペース・医療スタッフとも限界。教室や会議室等を転用した追加隔離スペースの設営判断、夜間体制の維持、住民説明・不安対応、記録管理が訓練ポイント。	夜間の体調不良者への応急対応、追加隔離スペースの即時設営検討、医療スタッフの夜間対応体制調整、症状者の経過観察記録、住民・家族への状況説明と不安対応、名簿・健康観察記録の更新、自治体・医療機関との情報共有	隔離スペースの物理的限界、夜間の人員・医療資材不足、体調不良者の重症化リスク、住民・家族の不安拡大、夜間の記録管理や名簿更新の遅延、感染拡大防止の徹底困難	3.0m前後の浸水が住宅1階全体・屋根上避難が継続（24時間以上継続予想）	避難所運営・健康被害・感染症対策・夜間対応	避難所での長時間滞在・密集状態により夜間に体調不良者がさらに発生。既存の隔離スペースが満床となり、教室や会議室等を転用した追加隔離スペースの設営が急務。住民・家族の不安や混乱も拡大しやすい状況で、夜間の医療スタッフ体制も逼迫している。	夜間も含めた定期的な健康観察・体調管理、感染症対策（隔離・消毒・換気・動線分離）、医療スタッフ・保健師の夜間シフト体制、衛生資材の十分な備蓄・迅速補給、住民説明・安心確保の体制強化、名簿・健康観察記録の徹底、追加スペース転用の事前マニュアル整備	平成30年7月豪雨（西日本豪雨）岡山県真備町などで、避難所内での感染症疑い・健康急変事案が多発し、夜間の医療体制や衛生資材不足、住民説明体制の課題が指摘された。	['避難所内での健康急変・感染症拡大', '体調不良者の重症化・医療搬送遅延', '名簿管理・健康観察の遅延', '住民の不安・混乱拡大']	['避難所内のパニック・不安拡大', '感染症の集団発生による避難所閉鎖リスク', '医療機関の受入超過・連携遅延', '衛生資材不足による二次的健康被害']
		1-30	405.363	発災から146分	避難所内での夜間体調不良者追加発生・医療スタッフ対応限界への警戒	避難所職員	○○付近（住所：枚方市楠葉並木一丁目25、UTM座標：〇〇〇〇〇〇）の避難所で、夜間健康観察中にさらに1名（成人男性）が発熱・咳・頭痛を訴えた。既存の隔離スペースは満床であり、追加の隔離スペース設営を現場で検討している。夜間のため医療機関への搬送は翌朝以降を予定し、症状の経過観察と家族の動線分離を実施中。	体調不良者は成人男性1名。家族は同避難所内に同伴。自治体本部・医療機関には追加連絡済み。夜間のため医療スタッフの対応体制が限界に近い状況。	標高約10.6m、極めて緩やかな傾斜（0.4%）の低地。淀川氾濫流が直接流入しやすく、住宅地・避難所全体で長時間の排水困難・孤立化リスクが非常に高い。避難所も低地部に立地し、長時間の避難生活による健康リスクが高まる。	避難所運営時の夜間体調急変・感染症疑い時の隔離スペース拡張判断、医療スタッフ夜間運用・住民説明・不安対応の訓練	夜間に体調不良者が連続発生し、隔離スペース・医療スタッフともに限界。追加隔離スペースの設営判断、夜間体制の維持、住民説明・不安対応、記録管理が訓練ポイント。	夜間の体調不良者への応急対応、追加隔離スペースの即時設営検討、医療スタッフの夜間対応体制調整、症状者の経過観察記録、住民・家族への状況説明と不安対応、名簿・健康観察記録の更新、自治体・医療機関との情報共有	隔離スペースの物理的限界、夜間の人員・医療資材不足、体調不良者の重症化リスク、住民・家族の不安拡大、夜間の記録管理や名簿更新の遅延、感染拡大防止の徹底困難	3.0m前後の浸水が住宅1階全体・屋根上避難が継続（24時間以上継続予想）	避難所運営・健康被害・感染症対策・夜間対応	避難所での長時間滞在・密集状態により夜間に体調不良者がさらに発生。既存の隔離スペースが満床となり、教室や会議室等を転用した追加隔離スペースの設営が急務。住民・家族の不安や混乱も拡大しやすい状況で、夜間の医療スタッフ体制も逼迫している。	夜間も含めた定期的な健康観察・体調管理、感染症対策（隔離・消毒・換気・動線分離）、医療スタッフ・保健師の夜間シフト体制、衛生資材の十分な備蓄・迅速補給、住民説明・安心確保の体制強化、名簿・健康観察記録の徹底、追加スペース転用の事前マニュアル整備	平成30年7月豪雨（西日本豪雨）岡山県真備町などで、避難所内での感染症疑い・健康急変事案が多発し、夜間の医療体制や衛生資材不足、住民説明体制の課題が指摘された。	['避難所内での健康急変・感染症拡大', '体調不良者の重症化・医療搬送遅延', '名簿管理・健康観察の遅延', '住民の不安・混乱拡大']	['避難所内のパニック・不安拡大', '感染症の集団発生による避難所閉鎖リスク', '医療機関の受入超過・連携遅延', '衛生資材不足による二次的健康被害']
		1-31	405.363	発災から151分	避難所内での夜間体調不良者追加発生・隔離スペースの再拡張要請	避難所職員	○○付近（住所：枚方市楠葉並木一丁目25、UTM座標：〇〇〇〇〇〇）の避難所で、夜間巡回中にさらに2名（高齢男性1名・成人女性1名）が発熱・咳・全身倦怠感を訴えた。これまで設営した隔離スペースも満床となり、職員による更なる追加隔離スペース（体育館倉庫や廊下の一部区画等の転用）の設営を現場判断で決定。夜間のため医療機関搬送は翌朝以降を想定し、症状者の経過観察と家族の動線分離を実施している。	新たな体調不良者は高齢男性1名と成人女性1名。家族は同避難所内に同伴。自治体本部・医療機関には追加連絡済み。夜間のため医療スタッフの対応体制も引き続き逼迫。	標高約10.6m、極めて緩やかな傾斜（0.4%）の低地。淀川氾濫流が直接流入しやすく、住宅地・避難所全体で長時間の排水困難・孤立化リスクが非常に高い。避難所も低地部に立地し、長時間の避難生活による健康リスクが高まる。	避難所運営時の夜間体調急変・隔離スペース再拡張対応、現場判断力・住民説明・感染症対策の現場運用訓練	夜間に体調不良者が連続発生し、既存隔離スペース・医療スタッフともに限界。体育館倉庫や廊下区画等を転用した更なる追加隔離スペース設営、夜間体制の維持、住民説明・不安対応、名簿・健康観察記録の徹底が訓練ポイント。	夜間の体調不良者への応急対応、追加隔離スペース（倉庫・廊下等）の即時設営、医療スタッフの夜間対応体制調整、症状者の経過観察記録、住民・家族への状況説明と不安対応、名簿・健康観察記録の更新、自治体・医療機関との情報共有。	隔離スペースの物理的限界に伴う収容困難、夜間の人員・医療資材不足、体調不良者の重症化リスク、住民・家族の不安拡大、夜間の記録管理や名簿更新の遅延、感染拡大防止の徹底困難	3.0m前後の浸水が住宅1階全体・屋根上避難が継続（24時間以上継続予想）	避難所運営・健康被害・感染症対策・夜間対応	避難所での長時間滞在・密集状態により、夜間に体調不良者がさらに追加発生。既存・追加の隔離スペースが満床となり、体育館倉庫や廊下区画等を転用した更なる追加隔離スペースの設営が急務。住民・家族の不安や混乱も拡大しやすい状況で、夜間の医療スタッフ体制も逼迫している。	夜間も含めた定期的な健康観察・体調管理、感染症対策（隔離・消毒・換気・動線分離）、医療スタッフ・保健師の夜間シフト体制、衛生資材の十分な備蓄・迅速補給、住民説明・安心確保の体制強化、名簿・健康観察記録の徹底、追加スペース転用の事前マニュアル整備	平成30年7月豪雨（西日本豪雨）岡山県真備町などで、避難所内での感染症疑い・健康急変事案が多発し、夜間の医療体制や衛生資材不足、住民説明体制の課題が指摘された。	['避難所内での健康急変・感染症拡大', '体調不良者の重症化・医療搬送遅延', '名簿管理・安否確認の遅延', '住民の不安・混乱拡大']	['避難所内のパニック・不安拡大', '感染症の集団発生による避難所閉鎖リスク', '医療機関の受入超過・連携遅延', '衛生資材不足による二次的健康被害']
		1-32	405.363	発災から157分	避難所内での夜間体調不良者多発・追加隔離スペースの限界突破と緊急対応会議の開催要請	避難所職員	○○付近（住所：枚方市楠葉並木一丁目25、UTM座標：〇〇〇〇〇〇）の避難所で、夜間巡回中にさらに2名（成人女性1名・小児1名）が発熱・咳・全身倦怠感を訴えた。これまで設営した隔離スペースや廊下・倉庫等の転用スペースも全て満床となり、職員間で現場の感染症対応体制・医療スタッフ・衛生資材の限界について緊急会議を開催する必要が生じている。	新たな体調不良者は成人女性と小児。家族は同避難所内に同伴。夜間のため医療機関搬送は翌朝以降を想定。自治体本部・医療機関には追加連絡済み。住民からは『これ以上の感染拡大が心配』『夜間でも何らかの追加対応を』との強い要望が出ている。	標高約10.6m、極めて緩やかな傾斜（0.4%）の低地。淀川氾濫流が直接流入しやすく、住宅地・避難所全体で長時間の排水困難・孤立化リスクが非常に高い。避難所も低地部に立地し、長時間の避難生活による健康リスクが高まる。	避難所運営時の夜間体調急変・隔離スペース限界突破時の緊急現場会議・意思決定訓練、住民説明・感染症対策・医療スタッフ夜間運用・現場判断力強化	避難所での体調不良者が連続発生し、全ての隔離スペースが満床。現場医療体制・衛生資材・人員が限界に達した段階で、職員間の緊急対応会議を開催し、今後の感染症対策・住民説明・自治体本部への支援要請など総合的な現場判断が必要となる。	夜間の体調不良者への応急対応、既存隔離スペースの再確認、緊急現場会議の開催（医療スタッフ・自治体職員・避難所責任者）、自治体本部への追加支援要請、住民・家族への状況説明と不安対応、感染症対策の再徹底、名簿・健康観察記録の更新、翌朝以降の医療搬送計画策定、自治体・医療機関との情報共有。	隔離スペース・医療資材の物理的限界、夜間の人員・医療スタッフ不足、体調不良者の重症化リスク、住民・家族の不安拡大、現場判断の遅れや混乱、名簿・健康観察記録の遅延、感染拡大防止の徹底困難	3.0m前後の浸水が住宅1階全体・屋根上避難が継続（24時間以上継続予想）	避難所運営・健康被害・感染症対策・夜間対応・現場判断	避難所での長時間滞在・密集状態により、夜間に体調不良者がさらに追加発生。既存・追加の隔離スペースが全て満床となり、現場の医療体制・衛生資材・人員が限界に達したことで、職員間で緊急会議を開催し、今後の感染症対策・住民説明・自治体本部への支援要請など総合的な現場判断が必要となっている。	夜間も含めた定期的な健康観察・体調管理、感染症対策（隔離・消毒・換気・動線分離）、医療スタッフ・保健師の夜間シフト体制、衛生資材の十分な備蓄・迅速補給、住民説明・安心確保の体制強化、名簿・健康観察記録の徹底、現場緊急会議マニュアルの整備、自治体・医療機関との連携強化	平成30年7月豪雨（西日本豪雨）岡山県真備町などで、避難所内での感染症疑い・健康急変事案が多発し、夜間の医療体制や衛生資材不足、住民説明体制の課題、現場判断の遅れが指摘された。	['避難所内での健康急変・感染症拡大', '体調不良者の重症化・医療搬送遅延', '名簿管理・安否確認の遅延', '住民の不安・混乱拡大', '現場判断の遅れによる対応遅延']	['避難所内のパニック・不安拡大', '感染症の集団発生による避難所閉鎖リスク', '医療機関の受入超過・連携遅延', '衛生資材不足による二次的健康被害']
		1-33	405.363	発災から162分	避難所内での夜間体調不良者の継続発生・現場から自治体本部への追加支援要請	避難所職員	○○付近（住所：枚方市楠葉並木一丁目25、UTM座標：〇〇〇〇〇〇）の避難所で、夜間巡回中に新たに2名（成人男性1名・高齢女性1名）が発熱・咳・全身倦怠感を訴えた。隔離スペースは全て満床となっており、現場での対応が限界に近づいているため、自治体本部に対し緊急で追加の医療スタッフ・衛生資材・簡易隔離テントの派遣を要請した。	新たな体調不良者の家族は同避難所内に同伴。夜間のため医療機関搬送は翌朝以降を想定。住民からは『感染拡大が心配』『夜間でも追加対応を』との要望が続いている。	標高約10.6m、極めて緩やかな傾斜（0.4%）の低地。淀川氾濫流が直接流入しやすく、住宅地・避難所全体で長時間の排水困難・孤立化リスクが非常に高い。避難所も低地部に立地し、長時間の避難生活による健康リスクが高まる。	避難所運営時の夜間体調急変・隔離スペース限界突破時の自治体本部への追加支援要請、現場判断力・住民説明・感染症対策の現場運用訓練	夜間に体調不良者がさらに追加発生し、全ての隔離スペースが満床。現場の医療体制・衛生資材・人員が限界に達した段階で、自治体本部への追加支援要請を迅速に行う判断力と、住民説明・感染症対策徹底が訓練ポイント。	夜間の体調不良者への応急対応、自治体本部への医療スタッフ・衛生資材・隔離テント等の追加派遣要請、症状者の経過観察記録、住民・家族への状況説明と不安対応、名簿・健康観察記録の更新、翌朝以降の医療搬送計画策定、自治体・医療機関との情報共有。	隔離スペースや医療資材の物理的限界、夜間の人員・医療スタッフ不足、体調不良者の重症化リスク、住民・家族の不安拡大、現場判断の遅れや混乱、名簿・健康観察記録の遅延、感染拡大防止の徹底困難	3.0m前後の浸水が住宅1階全体・屋根上避難が継続（24時間以上継続予想）	避難所運営・健康被害・感染症対策・夜間対応・自治体本部連携	避難所での長時間滞在・密集状態により、夜間に体調不良者がさらに追加発生。既存・追加の隔離スペースが全て満床となり、現場の医療体制・衛生資材・人員が限界に達したことで、自治体本部への追加支援要請を実施。住民・家族の不安や混乱も拡大しやすい状況。	夜間も含めた定期的な健康観察・体調管理、感染症対策（隔離・消毒・換気・動線分離）、医療スタッフ・保健師の夜間シフト体制、衛生資材の十分な備蓄・迅速補給、住民説明・安心確保の体制強化、名簿・健康観察記録の徹底、自治体本部との連携と追加支援要請マニュアルの整備	平成30年7月豪雨（西日本豪雨）岡山県真備町などで、避難所内での感染症疑い・健康急変事案が多発し、夜間の医療体制や衛生資材不足、住民説明体制の課題、現場判断の遅れが指摘された。	['避難所内での健康急変・感染症拡大', '体調不良者の重症化・医療搬送遅延', '名簿管理・安否確認の遅延', '住民の不安・混乱拡大', '現場判断の遅れによる対応遅延']	['避難所内のパニック・不安拡大', '感染症の集団発生による避難所閉鎖リスク', '医療機関の受入超過・連携遅延', '衛生資材不足による二次的健康被害']
		1-34	405.363	発災から167分	避難所内での夜間体調不良者追加発生・現場体制の一時的な安定化（続報）	避難所職員	○○付近（住所：枚方市楠葉並木一丁目25、UTM座標：〇〇〇〇〇〇）の避難所で、夜間巡回中に新たな体調不良者（発熱・咳・倦怠感を訴える成人女性1名）が発生。既存および追加の隔離スペースは満床だが、現時点で他の避難者の急激な体調悪化や集団発症はなく、職員・医療スタッフは経過観察と記録管理を強化しつつ、夜間体制を維持している。	新規体調不良者の家族は同避難所内に同伴。夜間のため医療機関搬送は翌朝以降を予定。自治体本部・医療機関には追加報告済み。住民からは『不安があるが今は落ち着いている』との声も出ている。	標高約10.6m、極めて緩やかな傾斜（0.4%）の低地。淀川氾濫流が直接流入しやすく、住宅地・避難所全体で長時間の排水困難・孤立化リスクが非常に高い。避難所も低地部に立地し、長時間の避難生活による健康リスクが高まる。	夜間の避難所運営における追加体調不良者発生時の現場体制維持・記録管理・住民説明の訓練。自治体本部・医療機関との情報共有と現場安定化の確認。	隔離スペース満床状態で追加体調不良者が発生したが、現場体制は一時的に安定。夜間の医療体制維持、記録管理、住民説明・不安対応、翌朝以降の追加対応計画が訓練ポイント。	新規体調不良者への応急対応と経過観察、追加隔離スペース設営の検討継続、健康観察記録・名簿管理の徹底、住民・家族への状況説明と安心確保、自治体本部・医療機関への逐次報告、翌朝以降の追加対応計画の準備。	隔離スペースの物理的限界、夜間の人員・医療資材不足、住民・家族の不安継続、体調不良者の重症化リスク、記録管理や名簿更新の遅延、感染拡大防止の徹底困難	3.0m前後の浸水が住宅1階全体・屋根上避難が継続（24時間以上継続予想）	避難所運営・健康被害・感染症対策・夜間対応	避難所での長時間滞在・密集状態により、夜間に体調不良者が連続発生。隔離スペース・医療スタッフともに限界状態だが、現場体制は一時的に安定。住民・家族の不安や混乱は継続しており、今後の追加発症や感染拡大リスクも残存。	夜間も含めた定期的な健康観察・体調管理、感染症対策（隔離・消毒・換気・動線分離）、医療スタッフの夜間シフト体制、衛生資材の十分な備蓄・迅速補給、住民説明・安心確保の体制強化、名簿・健康観察記録の徹底、翌朝以降の追加対応計画	平成30年7月豪雨（西日本豪雨）岡山県真備町などで、避難所内での感染症疑い・健康急変事案が多発し、夜間の医療体制や衛生資材不足、住民説明体制の課題が指摘された。	['避難所内での健康急変・感染症拡大', '体調不良者の重症化・医療搬送遅延', '名簿管理・安否確認の遅延', '住民の不安・混乱拡大']	['避難所内のパニック・不安拡大', '感染症の集団発生による避難所閉鎖リスク', '医療機関の受入超過・連携遅延', '衛生資材不足による二次的健康被害']
		1-35	405.363	発災から172分	避難所内での夜間体調不良者の新規発生・住民説明の強化要請	避難所職員	○○付近（住所：枚方市楠葉並木一丁目25、UTM座標：〇〇〇〇〇〇）の避難所で、夜間巡回中に新たな体調不良者（発熱・咳・倦怠感を訴える成人男性1名）が発生。既存の隔離スペースは満床であり、現在は経過観察を行いながら、他の避難者との動線分離を実施している。	新規体調不良者の家族は同避難所内に同伴。夜間のため医療機関搬送は翌朝以降を予定。自治体本部・医療機関には追加報告済み。住民からは『感染拡大が心配』『経過説明をもっと聞きたい』との声も増えている。	標高約10.6m、極めて緩やかな傾斜（0.4%）の低地。淀川氾濫流が直接流入しやすく、住宅地・避難所全体で長時間の排水困難・孤立化リスクが非常に高い。避難所も低地部に立地し、長時間の避難生活による健康リスクが高まる。	夜間の避難所運営における体調不良者発生時の現場体制維持、住民説明・安心確保、感染症対策・記録管理の強化訓練。	隔離スペース満床状態が継続し、追加体調不良者が発生。住民説明・不安対応、現場体制維持、感染症対策・記録管理の徹底、翌朝以降の医療搬送計画が訓練ポイント。	新規体調不良者への応急対応と経過観察、動線分離の徹底、健康観察記録・名簿管理の強化、住民・家族への状況説明と安心確保、自治体本部・医療機関への逐次報告、翌朝以降の追加対応計画の準備。	隔離スペースの物理的限界、夜間の人員・医療資材不足、住民・家族の不安増大、体調不良者の重症化リスク、記録管理や名簿更新の遅延、感染拡大防止の徹底困難	3.0m前後の浸水が住宅1階全体・屋根上避難が継続（24時間以上継続予想）	避難所運営・健康被害・感染症対策・夜間対応	避難所での長時間滞在・密集状態により、夜間に体調不良者が引き続き追加発生。既存の隔離スペースがすでに満床で、動線分離や経過観察で対応中。住民・家族の不安や説明要望が高まっており、現場体制維持と記録管理が重要となっている。	夜間も含めた定期的な健康観察・体調管理、感染症対策（隔離・消毒・換気・動線分離）、医療スタッフの夜間シフト体制、衛生資材の十分な備蓄・迅速補給、住民説明・安心確保の体制強化、名簿・健康観察記録の徹底、翌朝以降の追加対応計画。	平成30年7月豪雨（西日本豪雨）岡山県真備町などで、避難所内での感染症疑い・健康急変事案が多発し、夜間の医療体制や衛生資材不足、住民説明体制の課題が指摘された。	['避難所内での健康急変・感染症拡大', '体調不良者の重症化・医療搬送遅延', '名簿管理・安否確認の遅延', '住民の不安・混乱拡大']	['避難所内のパニック・不安拡大', '感染症の集団発生による避難所閉鎖リスク', '医療機関の受入超過・連携遅延', '衛生資材不足による二次的健康被害']
		1-36	405.363	発災から177分	避難所内での夜間体調不良者の追加発生・現場体制の一時的な安定化（続報）	避難所職員	○○付近（住所：枚方市楠葉並木一丁目25、UTM座標：〇〇〇〇〇〇）の避難所で、夜間巡回中に新たな体調不良者（発熱・咳・倦怠感を訴える高齢女性1名）が発生。既存の隔離スペースは満床であり、応急対応後は経過観察と家族・他避難者との動線分離で対応している。	新規体調不良者の家族は同避難所内に同伴。夜間のため医療機関搬送は翌朝以降を予定。自治体本部・医療機関には追加報告済み。住民からは『感染拡大が心配』『経過説明をもっと聞きたい』との声が引き続き寄せられている。	標高約10.6m、極めて緩やかな傾斜（0.4%）の低地。淀川氾濫流が直接流入しやすく、住宅地・避難所全体で長時間の排水困難・孤立化リスクが非常に高い。避難所も低地部に立地し、長時間の避難生活による健康リスクが高まる。	夜間の避難所運営における体調不良者追加発生時の現場体制維持、住民説明・安心確保、感染症対策・記録管理の強化訓練。	隔離スペース満床状態が継続し、夜間に追加体調不良者が発生。住民説明・不安対応、現場体制維持、感染症対策・記録管理の徹底、翌朝以降の医療搬送計画が訓練ポイント。	新規体調不良者への応急対応と経過観察、動線分離の徹底、健康観察記録・名簿管理の強化、住民・家族への状況説明と安心確保、自治体本部・医療機関への逐次報告、翌朝以降の医療搬送・体制強化計画の準備。	隔離スペースの物理的限界、夜間の人員・医療資材不足、住民・家族の不安増大、体調不良者の重症化リスク、記録管理や名簿更新の遅延、感染拡大防止の徹底困難	3.0m前後の浸水が住宅1階全体・屋根上避難が継続（24時間以上継続予想）	避難所運営・健康被害・感染症対策・夜間対応	避難所での長時間滞在・密集状態により、夜間に体調不良者が追加発生。既存の隔離スペースが満床で、動線分離や経過観察で対応中。住民・家族の不安や説明要望が高まっており、現場体制維持と記録管理が重要となっている。	夜間も含めた定期的な健康観察・体調管理、感染症対策（隔離・消毒・換気・動線分離）、医療スタッフの夜間シフト体制、衛生資材の十分な備蓄・迅速補給、住民説明・安心確保の体制強化、名簿・健康観察記録の徹底、翌朝以降の追加対応計画。	平成30年7月豪雨（西日本豪雨）岡山県真備町などで、避難所内での感染症疑い・健康急変事案が多発し、夜間の医療体制や衛生資材不足、住民説明体制の課題が指摘された。	['避難所内での健康急変・感染症拡大', '体調不良者の重症化・医療搬送遅延', '名簿管理・安否確認の遅延', '住民の不安・混乱拡大']	['避難所内のパニック・不安拡大', '感染症の集団発生による避難所閉鎖リスク', '医療機関の受入超過・連携遅延', '衛生資材不足による二次的健康被害']
		1-37	405.363	発災から182分	避難所内での夜間体調不良者の新規発生・現場体制の経過観察と住民説明強化（続報）	避難所職員	○○付近（住所：枚方市楠葉並木一丁目25、UTM座標：〇〇〇〇〇〇）の避難所で、夜間巡回中に新たな体調不良者（発熱・咳・全身倦怠感を訴える成人女性1名）が発生。隔離スペースは満床のため、応急対応後は家族とともに動線分離し、経過観察を継続している。	新規体調不良者の家族は同避難所内に同伴。夜間のため医療機関搬送は翌朝以降を予定。自治体本部・医療機関への追加報告済み。住民からは『不安はあるが、職員の説明で落ち着いている』との声も出ている。	標高約10.6m、極めて緩やかな傾斜（0.4%）の低地。淀川氾濫流が直接流入しやすく、住宅地・避難所全体で長時間の排水困難・孤立化リスクが非常に高い。避難所も低地部に立地し、長時間の避難生活による健康リスクが高まる。	夜間の避難所運営で体調不良者が継続発生する状況下における現場体制の維持、住民説明・安心確保、感染症対策・経過観察・記録管理の強化訓練。	隔離スペース満床が継続し、追加体調不良者が発生。住民説明・不安対応、現場体制維持、感染症対策・記録管理の徹底、翌朝以降の医療搬送計画が訓練ポイント。	新規体調不良者への応急対応と経過観察、動線分離の徹底、健康観察記録・名簿管理の強化、住民・家族への状況説明と安心確保、自治体本部・医療機関への逐次報告、翌朝以降の医療搬送・体制強化計画の準備。	隔離スペースの物理的限界、夜間の人員・医療資材不足、住民・家族の不安増大、体調不良者の重症化リスク、記録管理や名簿更新の遅延、感染拡大防止の徹底困難	3.0m前後の浸水が住宅1階全体・屋根上避難が継続（24時間以上継続予想）	避難所運営・健康被害・感染症対策・夜間対応	避難所での長時間滞在・密集状態により、夜間に体調不良者が追加発生。隔離スペースは既に満床で、動線分離や経過観察で対応中。住民・家族の不安や説明要望が高まっており、現場体制維持と記録管理が重要となっている。	夜間も含めた定期的な健康観察・体調管理、感染症対策（隔離・消毒・換気・動線分離）、医療スタッフの夜間シフト体制、衛生資材の十分な備蓄・迅速補給、住民説明・安心確保の体制強化、名簿・健康観察記録の徹底、翌朝以降の追加対応計画。	平成30年7月豪雨（西日本豪雨）岡山県真備町などで、避難所内での感染症疑い・健康急変事案が多発し、夜間の医療体制や衛生資材不足、住民説明体制の課題が指摘された。	['避難所内での健康急変・感染症拡大', '体調不良者の重症化・医療搬送遅延', '名簿管理・安否確認の遅延', '住民の不安・混乱拡大']	['避難所内のパニック・不安拡大', '感染症の集団発生による避難所閉鎖リスク', '医療機関の受入超過・連携遅延', '衛生資材不足による二次的健康被害']

## Sheet: 枚方市船橋本町一丁目874
評価	備考	シナリオID	災害の中心からの距離[m]	イベント発生時刻	付与内容	情報源	状況付与内容	補足情報	地形情報や想定想定される被害の特徴	訓練効果・狙い	判断ポイント	期待される対応行動	想定される課題	水位状況	被害の種類	詳細な被害状況	想定される対策	類似の過去事例(あれば記載)	直近のリスク	二次的なリスク
		1-1	507.983	発災から5分	住宅地内道路の冠水	住民	○○付近（住所：枚方市船橋本町一丁目874、UTM座標：〇〇〇〇〇〇）の住宅地内道路が水で覆われ、通行が困難になりつつある。自宅前の道路がすでに5cmほど冠水しており、今後の状況が心配との通報。	警察には連絡済み。道路名を聞かれた場合：「路線番号はわかりませんが、○○小学校の裏の住宅街です。」	標高12.5m前後、極めて緩やかな傾斜（平均0.6%）。淀川の氾濫時には低地部に水が滞留しやすく、側溝や排水路の能力を超えて冠水しやすい。	住民への周知と安全確保、現地状況の迅速な把握と初動対応の訓練	淀川流域の低地部で、車道・歩道に続き住宅街の道路にも冠水が波及するタイミング。住民目線での被害情報の把握と、初動の周知・対応訓練。	現地の冠水状況の確認、住民への避難・安全喚起、必要に応じて通行規制やバリケード設置。道路管理者・警察・消防との連携。	情報伝達の遅れによる住民の避難遅延、住宅街特有の細街路での通行規制の難しさ、冠水拡大による救急・消防車両の進入困難	0.5m以上1.0m未満の冠水が住宅地内道路に発生	生活インフラ被害（住宅地内道路冠水）	住宅地内の道路が冠水し、歩行者や車両の通行が困難に。今後浸水範囲が拡大すれば、住宅への浸水や孤立リスクも高まる。	現地確認と住民への迅速な情報発信、排水路・側溝の確認と詰まり除去、必要に応じて避難指示やバリケード設置、関係機関との連携強化。	平成30年7月豪雨（西日本豪雨）で淀川流域の住宅地にて同様の冠水・生活道路の通行障害が発生した事例あり。	['住宅地内の通行障害による住民の避難遅延', '歩行者・自転車の転倒事故']	['住宅への浸水拡大', '救急・消防車両の進入困難', '地域の一時的孤立化']
		1-2	507.983	発災から7分	住宅地内道路の冠水拡大と一部住宅敷地への浸水開始	住民	○○付近（住所：枚方市船橋本町一丁目874、UTM座標：〇〇〇〇〇〇）の住宅地で、道路冠水がさらに進み、玄関先や駐車場まで水が入り始めたとの通報。『自宅前の道路は10cmほど冠水し、敷地内にも水が流れ込んできている。今後、家屋への浸水が心配で避難の判断に迷っている』との内容。	警察には連絡済み。消防にはまだ連絡していない。道路名を聞かれた場合：「路線番号はわかりませんが、○○小学校の裏手の住宅街です。」	標高12.5m前後、平均傾斜0.6%の極めて緩やかな低地。淀川氾濫時は排水が追いつかず、側溝・排水路の能力を超えて冠水が住宅敷地にも波及しやすい地形。	住民への浸水リスクの再周知、早期避難の判断訓練、現地状況の迅速な把握と関係機関連携の強化	淀川氾濫による低地部での冠水拡大段階。道路冠水から住宅敷地への浸水が始まるタイミングで、住民の避難判断や初動対応力を確認する訓練。	現地浸水状況の即時確認、住民への避難勧告または指示の発令、要配慮者への個別支援、消防・警察・道路管理者との連携強化、避難所開設準備と情報発信、危険区域のバリケード設置や立入制限。	情報伝達の遅れによる避難の遅延、高齢者・要支援者の避難誘導の困難さ、夜間や悪天候時の現場巡回・安全確保、浸水拡大ペースの予測困難、救急・消防車両の進入困難	1.0m以上1.5m未満の冠水が住宅地内道路および一部住宅敷地に拡大中	生活インフラ・住宅被害（住宅敷地への浸水拡大）	住宅地の道路冠水がさらに広がり、一部住宅の敷地や駐車場への浸水が始まった。今後、家屋への床下・床上浸水リスクが高まる。住民の避難が遅れると人的被害や孤立リスクも増大。	住民への早期避難勧告・指示、避難所の迅速な開設・周知、要支援者リストの活用による個別支援、消防・警察・道路管理者との連携強化、現場巡回とバリケード設置、排水路の詰まり除去	平成30年7月豪雨（西日本豪雨）で淀川流域の住宅地にて同様の冠水・敷地への浸水拡大事例あり。	['住宅への床下・床上浸水', '住民の避難遅延による人的被害']	['地域の一時的孤立化', '電気設備やガス機器の浸水による感電・火災', '救急・消防車両の進入困難']
		1-3	507.983	発災から14分	住宅への床下浸水と避難判断相談	住民	○○付近（住所：枚方市船橋本町一丁目874、UTM座標：〇〇〇〇〇〇）の自宅で、玄関から水が屋内に流れ込み始め、床下まで水が到達した。『1階の床下に水が入り、家財への影響が心配。家族で2階に避難したが、今後どうすればよいか不安』との通報。	警察には既に連絡済み。消防にはまだ連絡していない。道路名を聞かれた場合：「路線番号はわかりませんが、○○小学校の裏の住宅街です。」	標高12.5m前後、極めて緩やかな傾斜（平均0.6%）。淀川氾濫時には低地部に水が滞留しやすく、住宅への浸水が拡大しやすい地形。	住民の避難判断・初動避難行動の訓練、床下浸水時の安全確保・行政連携の確認	道路・敷地冠水から住宅床下への浸水段階へ進行。住民による垂直避難や、避難指示のタイミング判断、消防・警察・自治体の連携が訓練ポイント。	現地の床下浸水状況の即時確認、住民への避難指示や勧告の発令、消防・警察・自治体の連携による垂直避難支援、避難所の案内と開設、要配慮者リストの確認と個別支援、危険区域の周知と立入制限。	住民の避難判断の遅れ、高齢者や要支援者の避難支援、床下浸水から床上浸水への急速な進行、夜間や悪天候時の避難誘導、消防・警察の現場到着遅延	1.5m以上2.0m未満の浸水が住宅床下に到達	住宅被害（床下浸水）・避難行動	住宅床下まで水が到達し、今後床上浸水へ進行する恐れが高い。住民が2階への垂直避難を開始。家財や電気設備の一部損傷リスクも顕在化。避難の遅れや孤立リスクが高まる。	住民への迅速な避難指示・勧告、避難所開設・案内、要支援者リストによる個別支援、現地巡回と安否確認、消防・警察・自治体連携による垂直避難支援、電気・ガスの安全確認と遮断、危険区域の立入制限	平成30年7月豪雨（西日本豪雨）で淀川流域の住宅地にて同様の床下浸水・避難事例多数。	['住宅の床上浸水進行', '住民の避難遅延による人的被害', '電気設備の浸水による感電']	['地域の一時的孤立化', '高齢者・要支援者の避難困難', '浸水拡大による救急・消防車両の進入困難']
		1-4	507.983	発災から19分	住宅1階への床上浸水と住民の孤立状態発生	住民	○○付近（住所：枚方市船橋本町一丁目874、UTM座標：〇〇〇〇〇〇）の自宅で、1階床上まで水が上がり、家族全員で2階に避難している。周囲の道路はすでに水没し、外への避難ができない状況。救助を要請したい。	警察・消防には既に連絡済み。道路名を聞かれた場合：「路線番号はわかりませんが、○○小学校の裏手の住宅街です。」	標高12.5m前後、極めて緩やかな傾斜（平均0.6%）。淀川氾濫時には低地部に水が滞留しやすく、住宅地全体で排水困難。高台や迂回路がほぼなく、孤立化リスクが高い。	床上浸水・住民孤立時の救助要請対応、垂直避難・救助判断訓練、現場情報の即時把握と優先順位付け	床下浸水から床上浸水へ進行し、住民が自力避難困難な孤立状態。現場からの救助要請対応や救助手段（ボート・ヘリ等）の選定、要配慮者支援の優先順位判断が訓練ポイント。	現地の床上浸水・孤立状況の即時確認、住民への安否確認と救助計画の立案、消防・警察・自治体による救助隊派遣、ボートやヘリ等の救助手段の検討、避難所の案内と受入準備、要支援者リストによる優先支援、危険区域の立入制限と周辺住民への情報発信。	救助隊の現場到着遅延、浸水範囲拡大による救助困難化、夜間・悪天候時の救助活動の危険、孤立住民の健康悪化やパニック、救助要請の優先順位付けの難しさ、通信手段の途絶	2.0m以上2.5m未満の浸水が住宅1階床上に到達（24時間未満継続予想）	住宅被害（床上浸水）・住民孤立	住宅1階まで水が上がり、住民は2階や屋根などに垂直避難。周囲の道路や敷地は完全に水没し、外部への避難・救助が困難。高齢者や要配慮者がいる場合は生命の危険も高まる。	早期の避難指示・勧告、要支援者リストによる個別支援、現場巡回と安否確認、ボート・ヘリ等の救助手段の事前準備、電気・ガスの遮断、危険区域の立入制限、避難所の早期開設と受入体制強化	平成30年7月豪雨（西日本豪雨）で淀川流域の低地住宅地にて同様の床上浸水・孤立事例多数。岡山県真備町や広島県三原市などで救助活動が難航した記録あり。	['住宅の床上浸水による住民の孤立・生命危険', '電気設備の浸水による感電・火災', '救助遅延による健康被害']	['地域の長期的孤立化', '感染症・衛生環境の悪化', '救助活動中の二次災害（流れの強い水中での事故）']
		1-5	507.983	発災から25分	住宅2階・屋根上への垂直避難と複数住民からの救助要請	消防	○○付近（住所：枚方市船橋本町一丁目874、UTM座標：〇〇〇〇〇〇）の住宅地で、1階が完全に浸水し、複数の住民が2階や屋根上へ避難しているとの現場報告。消防隊が現地に到着したが、周囲の道路は完全に水没し、地上からの接近と救助が困難。ボートによる救助活動を検討中。	現場付近の住民からも複数の救助要請が入っている。警察・自治体とも情報共有済み。道路名を聞かれた場合：「路線番号はわかりませんが、○○小学校裏手の住宅街です。」	標高12.5m前後、極めて緩やかな傾斜（平均0.6%）。淀川氾濫流が低地部に広がりやすく、住宅地全体で排水困難。高台や迂回路がほぼなく、孤立化リスクが高い。	床上浸水・住民孤立発生時の救助活動判断、ボートやヘリ等の救助手段の選定、現場情報の即時把握と救助優先順位付け訓練	床上浸水が進行し、複数世帯で2階や屋根上への避難が必要となった段階。消防隊による現地確認と地上救助の困難化、ボート・ヘリ運用など多様な救助手段の検討が訓練ポイント。	現地の床上浸水・孤立状況の即時把握、住民への安否確認と救助計画の立案、ボートやヘリ等の救助手段の準備・出動判断、要配慮者リストによる優先支援、避難所の受入体制強化、危険区域の立入制限、関係機関との連携強化。	救助隊の現場到着遅延、浸水範囲拡大による救助活動困難化、屋根上避難者の健康悪化やパニック、夜間・悪天候時の救助活動の危険、通信手段の途絶、救助要請の優先順位付けの難しさ	2.5m以上3.0m未満の浸水が住宅1階全体に拡大（24時間未満継続予想）	住宅被害（床上浸水・屋根上避難）・住民孤立	住宅1階が完全に浸水し、住民は2階や屋根上に避難。周囲の道路や敷地は完全に水没し、外部への避難・救助が困難。複数世帯で救助要請が発生し、要配慮者や高齢者の健康リスクも高まる。	早期の避難指示・勧告、要支援者リストによる個別支援、現場巡回と安否確認、ボート・ヘリ等の救助手段の事前準備と迅速な出動、電気・ガスの遮断、危険区域の立入制限、避難所の受入体制強化、関係機関との情報共有	平成30年7月豪雨（西日本豪雨）で淀川流域の低地住宅地にて同様の床上浸水・屋根上避難・孤立事例多数。岡山県真備町や広島県三原市などで救助活動が難航した記録あり。	['住宅の床上浸水による住民の孤立・生命危険', '屋根上避難者の健康悪化・転落リスク', '電気設備の浸水による感電・火災']	['地域の長期的孤立化', '感染症・衛生環境の悪化', '救助活動中の二次災害（流れの強い水中での事故）']
		1-6	507.983	発災から30分	屋根上避難住民からの直接通報と救助要請（健康悪化者あり）	住民	○○付近（住所：枚方市船橋本町一丁目874、UTM座標：〇〇〇〇〇〇）の自宅で、1階が完全に水没し、家族4人が屋根の上で救助を待っている。高齢者1名が体調不良を訴えており、意識がもうろうとしている。周囲は水流が速く、地上からの避難は不可能。	消防・警察には既に通報済み。道路名を聞かれた場合：「路線番号はわかりませんが、○○小学校裏手の住宅地です。」	標高12.5m前後、極めて緩やかな傾斜（平均0.6%）。淀川氾濫流が低地部に広がりやすく、住宅地全体で排水困難。高台や迂回路がほぼなく、孤立化リスクが高い。	屋根上避難住民からの救助要請への即応、要配慮者（健康悪化者）への優先対応判断、現場状況の即時把握と救助手段（ボート・ヘリ等）の選定訓練	床上浸水・屋根上避難が多数発生し、住民からの直接救助要請がある段階。救助要請の優先順位や救助手段の判断、多様な関係機関との連携が訓練ポイント。特に体調不良者がいる場合の優先順位付け。	現地の屋根上避難・孤立状況の即時把握、住民への安否確認と救助計画の立案、ボートやヘリ等の救助手段の準備・出動判断、体調不良者への優先救助、要配慮者リストによる優先支援、避難所の受入体制強化、危険区域の立入制限、関係機関との連携強化。	救助隊の現場到着遅延、屋根上避難者の健康悪化やパニック、浸水範囲拡大による救助活動困難化、夜間・悪天候時の救助活動の危険、通信手段の途絶、救助要請の優先順位付けの難しさ、体調不良者の緊急対応	2.5m以上3.0m未満の浸水が住宅1階全体に拡大、屋根上避難が必要な状況（24時間未満継続予想）	住宅被害（床上浸水・屋根上避難）・住民孤立・救助要請	住宅1階が完全に浸水し、住民は2階や屋根上に避難。周囲の道路や敷地は完全に水没し、外部への避難・救助が困難。高齢者を含む住民から直接救助要請が発生し、体調不良者もおり、迅速な対応が求められる。	早期の避難指示・勧告、要支援者リストによる個別支援、現場巡回と安否確認、ボート・ヘリ等の救助手段の事前準備と迅速な出動、体調不良者の優先救助、電気・ガスの遮断、危険区域の立入制限、避難所の受入体制強化、関係機関との情報共有	平成30年7月豪雨（西日本豪雨）で淀川流域の低地住宅地にて同様の床上浸水・屋根上避難・孤立事例多数。岡山県真備町や広島県三原市などで救助活動が難航した記録あり。	['住宅の床上浸水による住民の孤立・生命危険', '屋根上避難者の健康悪化・転落リスク', '体調不良者の容体急変', '電気設備の浸水による感電・火災']	['地域の長期的孤立化', '感染症・衛生環境の悪化', '救助活動中の二次災害（流れの強い水中での事故）']
		1-7	507.983	発災から33分	屋根上・2階避難住民の救助要請続報（体調急変者の容体悪化）	消防	○○付近（住所：枚方市船橋本町一丁目874、UTM座標：〇〇〇〇〇〇）の住宅地で、屋根上および2階に避難している住民のうち、体調不良を訴えていた高齢者1名が意識を失ったとの現場消防隊からの報告。現地は水流が非常に強く、地上からの救助は依然として困難。ボートによる救助準備を進めているが、ヘリによる救助要請も検討が必要と判断。	現地周辺から複数の救助要請が継続して入っており、警察・自治体とも情報共有済み。道路名を聞かれた場合：「路線番号はわかりませんが、○○小学校裏手の住宅街です。」	標高12.5m前後、極めて緩やかな傾斜（平均0.6%）の低地。淀川氾濫流が住宅地全体に広がりやすく、排水困難。高台や迂回路がなく、孤立化リスクが高い。	体調急変者への最優先救助判断、複数要救助者への救助手段（ボート・ヘリ等）の迅速な選定、関係機関連携の即時強化、優先順位付け訓練	屋根上・2階避難住民の中から容体急変者が発生し、迅速な救助が必要となる段階。救助優先順位の再検討や、救助手段の多様化（ヘリ要請含む）が訓練のポイント。現場消防・警察・自治体・自衛隊等との連携・情報共有の即時性が問われる。	現場からの詳細な健康状態・人数把握、要配慮者（高齢者・体調不良者）の優先救助計画立案、ボート・ヘリ等の救助手段の迅速な準備・出動判断、住民・関係機関への情報発信、避難所の受入体制強化、危険区域の立入制限、関係機関（警察・消防・自衛隊・自治体）との連携強化	救助隊の現場到着遅延、要救助者の健康状態急変・生命危険、屋根上避難者のパニックや転落リスク、救助要請の優先順位付けの難しさ、通信手段の途絶、救助活動中の二次災害（強い流れによる事故や救助者の安全確保）	2.5m以上3.0m未満の浸水が住宅1階全体および周辺道路に継続（24時間未満継続予想）	住宅被害（床上浸水・屋根上避難）・住民孤立・要配慮者健康悪化	住宅1階が完全に浸水し、住民は2階や屋根上に避難。体調急変者が発生し、迅速な救助が必要。周囲の道路や敷地は完全に水没し、地上からの救助は非常に困難。複数世帯で救助要請が続発。	早期の避難指示・勧告、要支援者リストによる個別支援、現場巡回と安否確認、ボート・ヘリ等の救助手段の迅速な出動、要配慮者の優先救助、電気・ガスの遮断、危険区域の立入制限、避難所の受入体制強化、関係機関との情報共有	平成30年7月豪雨（西日本豪雨）で淀川流域の低地住宅地にて同様の床上浸水・屋根上避難・孤立事例多数。岡山県真備町や広島県三原市などで救助活動が難航した記録あり。	['住宅の床上浸水による住民の孤立・生命危険', '体調急変者の生命リスク', '屋根上避難者の健康悪化・転落リスク', '電気設備の浸水による感電・火災']	['地域の長期的孤立化', '感染症・衛生環境の悪化', '救助活動中の二次災害（流れの強い水中での事故）']
		1-8	507.983	発災から37分	屋根上・2階避難住民の救助活動本格化と現場安全確保要請	消防	○○付近（住所：枚方市船橋本町一丁目874、UTM座標：〇〇〇〇〇〇）の住宅地で、屋根上や2階に避難している住民の救助活動を現地消防隊が開始。水流が強く、救助ボートの進入時に流木や瓦礫が多く確認されている。複数の住民が手を振って救助を求めているが、一部住民は移動困難な状況。	現場隊員からの追加要請で、警察による周辺道路の立入規制と、追加の救助ボート・人員の派遣が必要。道路名を聞かれた場合：「路線番号は不明ですが、○○小学校裏手の住宅地です」。	標高12.5m前後、極めて緩やかな傾斜（平均0.6%）の低地。淀川氾濫流が住宅地全体に広がりやすく、排水困難。高台や迂回路がなく、孤立化リスクが高い。	現場安全管理と救助活動の両立、複数要救助者への優先順位判断、関係機関連携訓練、現場状況変化への即応力強化	屋根上・2階避難住民救助の本格化段階。流木・瓦礫等による救助活動の危険性増大、現場安全確保のための警察・消防・自治体の連携、追加資機材・人員要請判断が訓練ポイント。	現場の安全確保（流木・瓦礫除去、立入規制）、救助活動の継続・優先順位付け、追加ボート・人員の派遣、住民への状況説明と安心確保、要配慮者の優先救助、関係機関（警察・消防・自衛隊・自治体）との連携強化。	救助活動中の二次災害（流木衝突・転落事故）、救助隊員の安全確保、現場への追加資機材・人員到着の遅延、住民の不安増大、救助要請の優先順位付けの難しさ、通信手段の途絶	2.5m以上3.0m未満の浸水が住宅1階全体および周辺道路に継続（24時間未満継続予想）	住宅被害（床上浸水・屋根上避難）・住民孤立・救助活動中の現場安全リスク	住宅1階全体が浸水し、住民は2階や屋根上に避難。複数世帯で救助要請が続発。現場は流木や瓦礫の漂流が多く、救助ボートの進入時に衝突・転覆等の危険が高まっている。住民の中には体調不良や移動困難者も含まれ、救助活動の優先順位付けと現場安全管理が重要。	早期避難指示・勧告、要支援者リストによる個別支援、現場安全確保（立入規制・流木除去）、追加資機材・人員の迅速派遣、ボート・ヘリ等の救助手段の多様化、危険区域の立入制限、避難所の受入体制強化、関係機関との情報共有・連携	平成30年7月豪雨（西日本豪雨）で淀川流域の低地住宅地にて同様の床上浸水・屋根上避難・孤立事例多数。岡山県真備町等で救助活動中の流木衝突事故や現場隊員の安全確保が課題となった。	['住宅の床上浸水による住民の孤立・生命危険', '流木・瓦礫による救助活動中の隊員・住民の負傷', '屋根上避難者の健康悪化・転落リスク', '電気設備の浸水による感電・火災']	['地域の長期的孤立化', '感染症・衛生環境の悪化', '救助活動中の二次災害（流れの強い水中での事故・資機材損壊）']
		1-9	507.983	発災から41分	救助活動中の現場指揮再調整・追加救助隊要請	消防	○○付近（住所：枚方市船橋本町一丁目874、UTM座標：〇〇〇〇〇〇）の住宅地で、屋根上や2階に避難している住民への救助活動を続行中。現場では流木や瓦礫の増加により、進入していた救助ボートの一部が一時的に活動を中断せざるを得ない状況となった。現場指揮隊より『安全確保のため一部隊を一時退避させ、追加の救助ボート・資機材・人員の派遣を要請したい』との連絡。	現場では複数の住民が依然として屋根上・2階で救助を待っている。周辺道路は全域冠水し、陸路での接近は困難。道路名を聞かれた場合：「路線番号は不明ですが、○○小学校裏手の住宅地です」。	標高12.5m前後、極めて緩やかな傾斜（平均0.6%）の低地。淀川氾濫流が住宅地全体に広がりやすく、排水困難。高台や迂回路がなく、孤立化リスクが高い。	救助活動中の現場指揮再調整、追加資機材・人員要請判断、現場の安全確保と継続的救助活動の両立訓練	流木・瓦礫の増加により救助活動の危険性がさらに高まった状況で、現場指揮系統の再調整や追加救助隊派遣の判断が訓練ポイント。現場安全確保と住民救助のバランスが問われる。	現場の安全状況再評価、救助活動の一時中断・再開判断、追加救助隊・資機材の派遣要請、現場指揮系統の明確化、住民・関係機関への情報共有、救助要請住民の優先順位付け、警察・自衛隊等との連携強化	救助活動中の二次災害（流木衝突・転覆事故）リスク増大、現場隊員・住民の安全確保、追加資機材・人員到着の遅延、現場混乱・指揮系統の乱れ、住民の不安増大、通信手段の一時途絶	2.5m以上3.0m未満の浸水が住宅1階全体および周辺道路に継続（24時間未満継続予想）	住宅被害（床上浸水・屋根上避難）・住民孤立・救助活動中の現場安全リスク・救助活動遅延	住宅1階全体が浸水し、住民は2階や屋根上に避難。救助活動中に流木・瓦礫の増加で救助隊の安全確保が困難となり、一部活動を中断。追加の救助隊・資機材が必要な状況。住民の中には体調不良や移動困難者も含まれる。	現場安全確保（立入規制・流木除去）、追加資機材・人員の迅速派遣、現場指揮系統の明確化、ボート・ヘリ等の救助手段の多様化、住民への状況説明と安心確保、危険区域の立入制限、関係機関との情報共有・連携	平成30年7月豪雨（西日本豪雨）で淀川流域の低地住宅地にて同様の床上浸水・屋根上避難・孤立事例多数。岡山県真備町等で救助活動中の流木衝突事故や現場隊員の安全確保が課題となった。	['住宅の床上浸水による住民の孤立・生命危険', '流木・瓦礫による救助活動中の隊員・住民の負傷', '屋根上避難者の健康悪化・転落リスク', '救助活動の一時中断・遅延']	['地域の長期的孤立化', '感染症・衛生環境の悪化', '救助活動中の二次災害（流れの強い水中での事故・資機材損壊）']
		1-10	507.983	発災から49分	救助活動の一時中断と現場安全再評価	消防	○○付近（住所：枚方市船橋本町一丁目874、UTM座標：〇〇〇〇〇〇）の住宅地で、屋根上や2階に避難している住民への救助活動中、現場指揮隊より『流木や瓦礫の増加、水流の激化により救助ボートの追加出動が危険と判断し、一時的に活動を中断。現場の安全状況を再評価し、必要に応じて追加の救助隊・資機材の派遣を要請したい』との連絡。	現場では複数の住民が依然として屋根上・2階で救助を待っている。警察・自治体には既に情報共有済み。道路名を聞かれた場合：「路線番号は不明ですが、○○小学校裏手の住宅地です。」	標高12.5m前後、極めて緩やかな傾斜（平均0.6%）の低地。淀川氾濫流が住宅地全体に広がりやすく、排水困難。高台や迂回路がなく、孤立化リスクが高い。	救助活動中の現場安全再評価、追加資機材・人員要請判断、現場の安全確保と継続的救助活動の両立訓練	救助活動中の二次災害リスクを受け、現場指揮隊が安全を最優先して一時活動を中断。現場安全確保と住民救助のバランス、追加救助隊派遣の判断が訓練ポイント。	現場の安全状況再評価、救助活動の一時中断・再開判断、追加救助隊・資機材の派遣要請、現場指揮系統の明確化、住民・関係機関への情報共有、救助要請住民の優先順位付け、警察・自衛隊等との連携強化。	救助活動中の二次災害リスク増大、現場隊員・住民の安全確保、追加資機材・人員到着の遅延、現場混乱・指揮系統の乱れ、住民の不安増大、通信手段の一時途絶	2.5m以上3.0m未満の浸水が住宅1階全体および周辺道路に継続（24時間未満継続予想）	住宅被害（床上浸水・屋根上避難）・住民孤立・救助活動遅延	住宅1階全体が浸水し、住民は2階や屋根上に避難。救助活動中に流木・瓦礫の増加で救助隊の安全確保が困難となり、一部活動を中断。追加の救助隊・資機材が必要な状況。住民の中には体調不良や移動困難者も含まれる。	現場安全確保（立入規制・流木除去）、追加資機材・人員の迅速派遣、現場指揮系統の明確化、ボート・ヘリ等の救助手段の多様化、住民への状況説明と安心確保、危険区域の立入制限、関係機関との情報共有・連携	平成30年7月豪雨（西日本豪雨）で淀川流域の低地住宅地にて同様の床上浸水・屋根上避難・孤立事例多数。岡山県真備町等で救助活動中の流木衝突事故や現場隊員の安全確保が課題となった。	['住宅の床上浸水による住民の孤立・生命危険', '流木・瓦礫による救助活動中の隊員・住民の負傷', '屋根上避難者の健康悪化・転落リスク', '救助活動の一時中断・遅延']	['地域の長期的孤立化', '感染症・衛生環境の悪化', '救助活動中の二次災害（流れの強い水中での事故・資機材損壊）']
		1-11	507.983	発災から53分	救助活動再開に向けた追加資機材・人員派遣要請と現場指揮本部設置準備	消防	○○付近（住所：枚方市船橋本町一丁目874、UTM座標：〇〇〇〇〇〇）の住宅地で、現場指揮隊より『救助活動の再開にあたり、追加の救助ボート・救命胴衣・救助用ロープなど資機材の派遣と、現場に臨時指揮本部を設置したい』との要請。状況は依然として厳しく、屋根上や2階で救助を待つ住民が複数名確認されている。	現場は流木・瓦礫の漂流が多く、追加の救助隊・資機材が到着するまで救助活動は一部制限。警察・自治体・自衛隊との連携も必要。道路名を聞かれた場合：「路線番号は不明ですが、○○小学校裏手の住宅地です」。	標高12.5m前後、極めて緩やかな傾斜（平均0.6%）の低地。淀川氾濫流が住宅地全体に広がりやすく、排水困難。高台や迂回路がなく、孤立化リスクが高い。	現場指揮本部の設置による指揮・調整体制強化、追加資機材・人員要請判断、現場安全確保と住民救助の両立訓練	現場安全再評価後、追加資機材・人員要請と現場指揮本部設置による指揮命令系統の強化。関係機関連携・現場状況変化への即応力強化が訓練ポイント。	現場指揮本部の設置と指揮系統の明確化、追加救助隊・資機材の迅速な派遣要請、現場安全状況の継続的評価、住民・関係機関への情報共有、救助要請住民の優先順位付け、警察・自衛隊等との連携強化。	追加資機材・人員到着までの救助活動制限、現場指揮系統の混乱防止、関係機関連携の遅れ、住民・隊員の安全確保、通信手段の維持	2.5m以上3.0m未満の浸水が住宅1階全体および周辺道路に継続（24時間未満継続予想）	住宅被害（床上浸水・屋根上避難）・住民孤立・救助活動再開準備	住宅1階全体が浸水し、住民は2階や屋根上に避難。救助活動は現場安全確保のため一時中断中だが、追加救助隊・資機材の到着と現場指揮本部設置により、救助活動再開の準備が進められている。住民の中には体調不良や移動困難者も含まれる。	現場安全確保（立入規制・流木除去）、追加資機材・人員の迅速派遣、現場指揮本部設置による指揮系統強化、救助手段の多様化、住民への状況説明と安心確保、危険区域の立入制限、関係機関との情報共有・連携	平成30年7月豪雨（西日本豪雨）で淀川流域の低地住宅地にて同様の床上浸水・屋根上避難・孤立事例多数。岡山県真備町等で救助活動中の流木衝突事故や現場隊員の安全確保が課題となった。	['住宅の床上浸水による住民の孤立・生命危険', '流木・瓦礫による救助活動中の隊員・住民の負傷', '屋根上避難者の健康悪化・転落リスク', '救助活動の一時中断・遅延']	['地域の長期的孤立化', '感染症・衛生環境の悪化', '救助活動中の二次災害（流れの強い水中での事故・資機材損壊）']
		1-12	507.983	発災から56分	救助活動再開と住民への現場状況説明	消防	○○付近（住所：枚方市船橋本町一丁目874、UTM座標：〇〇〇〇〇〇）の住宅地で、追加の救助ボートや救助用資機材が到着し、現場指揮本部の指示のもとで救助活動が再開された。現場では複数の住民が屋根上や2階で救助を待機しており、現場隊員が住民に現状や今後の救助方針について説明・声掛けを実施中。	現場は流木や瓦礫の漂流が続き、救助活動は安全確認を徹底しながら段階的に再開。警察・自衛隊とも連携中。道路名を聞かれた場合：「路線番号は不明ですが、○○小学校裏手の住宅地です」。	標高約12.5m、極めて緩やかな傾斜（平均0.6%）の低地。淀川氾濫流が住宅地全体に広がりやすく、排水困難。高台や迂回路がなく、孤立化リスクが高い。	現場指揮本部主導による救助活動再開、住民への状況説明・安心確保、関係機関との連携強化訓練	現場安全対策を講じたうえでの救助活動再開段階。追加資機材・人員投入後、指揮命令系統のもとで住民救助を効率的に進める。住民への状況説明や安心確保のコミュニケーションも重視。	現場指揮本部の指示に基づく救助活動の再開、住民への状況説明・声掛け、要配慮者の優先救助、現場安全確認の継続、関係機関（警察・自衛隊・自治体）との連携強化、救助活動の進捗報告。	流木・瓦礫による救助活動の危険、住民の不安増大、追加資機材の運用調整、現場指揮系統の混乱防止、通信手段維持の困難	2.5m以上3.0m未満の浸水が住宅1階全体・屋根上避難が継続（24時間未満継続予想）	住宅被害（床上浸水・屋根上避難）・住民孤立・救助活動再開	住宅1階全体が浸水し、住民は2階や屋根上に避難。現場指揮本部の設置・追加資機材の到着により、救助活動が再開。住民の中には体調不良や移動困難者も含まれ、現場では住民への状況説明や安心確保のための声掛けが行われている。	現場安全確保（立入規制・流木除去）、追加資機材・人員の迅速運用、現場指揮本部による指揮系統強化、住民への状況説明・安心確保、要配慮者の優先救助、危険区域の立入制限、関係機関との情報共有・連携	平成30年7月豪雨（西日本豪雨）で淀川流域の低地住宅地にて同様の床上浸水・屋根上避難・孤立事例多数。岡山県真備町等で救助活動再開時の現場安全管理や住民対応が課題となった。	['住宅の床上浸水による住民の孤立・生命危険', '流木・瓦礫による救助活動中の隊員・住民の負傷', '屋根上避難者の健康悪化・転落リスク', '救助活動中の現場混乱・指揮系統の乱れ']	['地域の長期的孤立化', '感染症・衛生環境の悪化', '救助活動中のさらなる二次災害（流れの強い水中での事故・資機材損壊）']
		1-13	507.983	発災から63分	住民救助の継続と現場応急医療対応開始	消防	○○付近（住所：枚方市船橋本町一丁目874、UTM座標：〇〇〇〇〇〇）の住宅地で、救助活動が継続中。救助ボートで救出された住民の一部に体調不良（低体温症や脱水症状等）が見られ、現場で応急手当班による医療対応が開始された。	救助対象住民には高齢者や持病持ちが含まれている。警察・自衛隊・医療機関とも情報共有済み。道路名を聞かれた場合：「路線番号は不明ですが、○○小学校裏手の住宅地です」。	標高約12.5m、極めて緩やかな傾斜（平均0.6%）の低地。淀川氾濫流が住宅地全体に広がりやすく、排水困難。高台や迂回路がなく、孤立化リスクが高い。	住民救助活動の実動訓練と現場応急医療対応、要配慮者の救命優先、関係機関連携の強化、救助後の住民ケア体制の確認	救助活動再開後、住民の救出が順次進行し、救助後の現場応急手当や医療搬送判断が必要となる段階。高齢者・要配慮者への現場医療対応や、救助活動と医療体制の連携強化が訓練のポイント。	救助活動の継続・進捗管理、救出住民の健康状態確認と応急手当、要配慮者の医療機関搬送判断、現場安全確認、警察・自衛隊・医療機関との連携、住民への状況説明・安心確保、救助活動記録・報告	救助住民の健康悪化や搬送遅延、現場医療資機材の不足、救助活動中の安全確保、住民のパニックや不安拡大、通信手段の維持、関係機関連携の遅れ	2.5m以上3.0m未満の浸水が住宅1階全体・屋根上避難が継続（24時間未満継続予想）	住宅被害（床上浸水・屋根上避難）・住民孤立・救助活動・現場医療対応	住宅1階全体が浸水し、住民は2階や屋根上に避難。救助活動再開後、順次住民が救出されているが、長時間の孤立や浸水による体調不良（低体温症・脱水・持病悪化）が複数発生。現場での応急手当や医療搬送が必要となっている。	早期避難指示・勧告、要支援者リストによる個別支援、現場応急手当班の配置、医療機関との連携体制強化、救助活動中の安全管理、住民への状況説明・安心確保、関係機関との情報共有・連携	平成30年7月豪雨（西日本豪雨）岡山県真備町で床上浸水・屋根上避難・孤立住民の救助後、現場での応急手当や医療搬送が多数発生した事例あり。	['住宅の床上浸水による住民の孤立・生命危険', '救助住民の体調悪化・低体温症・持病の急変', '救助活動中の隊員・住民の負傷']	['感染症・衛生環境の悪化', '救助活動中のさらなる二次災害（流木衝突・感電等）', '医療搬送の遅延による健康被害']
		1-14	507.983	発災から66分	救助住民の医療機関搬送調整と住民・家族への情報発信	消防	○○付近（住所：枚方市船橋本町一丁目874、UTM座標：〇〇〇〇〇〇）の救護所で、救助された住民のうち体調不良や持病悪化が認められる複数名について、現場から医療機関への搬送調整が始まった。家族や近隣住民からも安否確認や搬送状況の問い合わせが相次いでいる。	搬送対象住民には高齢者・持病持ち・低体温症の方が含まれる。現場救護所から医療機関までの搬送ルート確保が課題。警察・自衛隊・医療機関と連携中。道路名を聞かれた場合：「路線番号は不明ですが、○○小学校裏手の住宅地です」。	標高約12.5m、極めて緩やかな傾斜（平均0.6%）の低地。淀川氾濫流が住宅地全体に広がりやすく、排水困難。高台や迂回路がなく、孤立化リスクが高い。	広域搬送体制の訓練、医療機関との連携、搬送優先順位判断、現場～搬送先間の情報伝達・調整の実践、住民・家族への情報発信体制の確認	現場応急手当後の住民広域搬送段階。救助活動の終息に向けて、医療機関との連携・搬送ルート確保・搬送優先順位判断・現場～搬送先間の情報共有、住民・家族への説明体制強化が訓練のポイント。	搬送対象者の優先順位付け、救急車・ドクターヘリ等の搬送手段調整、搬送ルートの安全確認、現場から医療機関への情報連携、住民・家族への説明、搬送記録の作成、関係機関との連携強化。	搬送対象者多数による優先順位判断の難しさ、搬送ルートの冠水・障害物による遅延、救急車・ヘリの運用調整、医療機関の受入体制調整、住民・家族の不安増大、現場と搬送先間の情報伝達遅延	2.5m以上3.0m未満の浸水が住宅1階全体・屋根上避難が継続（24時間未満継続予想）	住宅被害（床上浸水・屋根上避難）・住民孤立・救助活動・広域医療搬送	住宅1階全体が浸水し、住民は2階や屋根上に避難。救助活動再開後、順次住民が救出され、現場応急手当班による医療対応が行われているが、体調不良や持病悪化、低体温症等で医療機関への広域搬送が必要な住民が複数発生。家族・近隣からの安否確認や搬送状況の問い合わせも増加している。	早期避難指示・勧告、要支援者リストによる個別支援、現場応急手当班・医療機関との連携体制強化、搬送ルートの事前確保・安全確認、搬送優先順位判断基準の整備、住民・家族への説明体制強化、関係機関との情報共有・連携	平成30年7月豪雨（西日本豪雨）岡山県真備町で床上浸水・屋根上避難・孤立住民の救助後、現場からの広域医療搬送が多数発生し、搬送ルートの冠水・渋滞・現場～搬送先間の連携が課題となった事例あり。	['住宅の床上浸水による住民の孤立・生命危険', '救助住民の体調悪化・低体温症・持病の急変', '搬送中の体調急変・搬送遅延']	['感染症・衛生環境の悪化', '搬送ルートの冠水・障害物による遅延', '医療機関の受入超過・連携遅延']
		1-15	507.983	発災から72分	救助活動終息に向けた現場撤収準備と残留住民の安否確認	消防	○○付近（住所：枚方市船橋本町一丁目874、UTM座標：〇〇〇〇〇〇）の住宅地で、救助活動がほぼ完了し、現場指揮本部から『現地に残る住民の安否確認と、救助隊・資機材の安全な撤収準備を開始する』との通達。現場では一部住民の所在確認が続いているが、多数の住民は既に搬送・避難済み。	安否不明住民の中には連絡が取れない方が数名含まれる。警察・自衛隊・医療機関と引き続き連携。道路名を聞かれた場合：「路線番号は不明ですが、○○小学校裏手の住宅地です」。	標高約12.5m、極めて緩やかな傾斜（平均0.6%）の低地。淀川氾濫流が住宅地全体に広がりやすく、排水困難。高台や迂回路がなく、孤立化リスクが高い。	救助活動終息段階での住民安否確認・行方不明者捜索、現場撤収判断、関係機関連携体制の確認訓練	救助活動の終息に伴い、全住民の安否確認・行方不明者捜索、現場隊員・資機材の安全な撤収を段階的に進める。現場指揮本部・関係機関の連携・情報共有が重要な訓練ポイント。	残る住民の安否確認、行方不明者の捜索・情報収集、現場資機材の撤収準備、関係機関との撤収調整、住民・家族への状況説明、撤収後の現場安全管理（立入規制等）、活動記録・報告作成。	安否不明住民の捜索難航、現場撤収中の安全確保、資機材損耗・紛失、住民・家族の不安増大、現場と本部間の情報伝達遅延	2.5m以上3.0m未満の浸水が住宅1階全体・屋根上避難が継続（24時間未満継続予想）	住宅被害（床上浸水・屋根上避難）・住民孤立・救助活動終息・安否確認・現場撤収	住宅1階全体が長時間浸水し、住民は2階や屋根上に避難していた。救助活動・広域搬送がほぼ完了し、現場では安否不明住民の捜索と残留者の確認、撤収準備が進行中。現場の安全管理と情報共有が重要。	早期避難指示・勧告、要支援者リストによる個別支援、現場応急手当班・医療機関との連携体制強化、撤収時の安全管理、安否確認・行方不明者捜索の徹底、住民・家族への説明体制強化、関係機関との情報共有・連携	平成30年7月豪雨（西日本豪雨）岡山県真備町で床上浸水・屋根上避難・孤立住民の救助活動終息後、安否確認・撤収段階での捜索・情報共有・住民対応が重要課題となった事例あり。	['安否不明住民の生命危険', '撤収作業中の隊員・住民の安全リスク', '現場撤収遅延・資機材損耗']	['感染症・衛生環境の悪化', '住民・家族の不安増大', '現場と本部間の情報伝達遅延']
		1-16	507.983	発災から80分	現場撤収・活動記録整理と住民・家族への最終状況説明	消防	○○付近（住所：枚方市船橋本町一丁目874、UTM座標：〇〇〇〇〇〇）の住宅地で、救助活動・安否確認が完了し、現場指揮本部より『救助隊・資機材の撤収作業を本格開始。現場活動記録と住民・家族への最終状況説明を実施する』との通達。	撤収作業中も住民や家族から状況確認の問い合わせが続いている。警察・自衛隊・医療機関と連携し、最終的な住民名簿・安否リストを整理中。道路名を聞かれた場合：「路線番号は不明ですが、○○小学校裏手の住宅地です」。	標高約12.5m、極めて緩やかな傾斜（平均0.6%）の低地で、淀川氾濫流が住宅地全体に広がりやすい。高台や迂回路がなく孤立化リスクが高い。	救助活動終息後の撤収・記録整理、住民・家族への説明体制、現場の安全管理・情報共有の確認訓練	救助活動が完全に終息し、撤収・記録整理・住民対応の最終段階。住民・家族への説明や現場安全管理、関係機関連携の確認が訓練ポイント。	撤収作業の安全管理、資機材の点検・整理、住民・家族への最終説明・状況報告、安否確認リストの確定・共有、現場の立入規制・安全措置、活動記録・報告書の作成、関係機関との最終調整。	撤収作業中の事故・負傷、資機材の紛失・損傷、住民・家族への説明対応の遅延、安否確認リストの整合性確保、現場と本部間の情報伝達遅延	2.5m以上3.0m未満の浸水が住宅1階全体・屋根上避難が継続（24時間未満継続予想）	住宅被害（床上浸水・屋根上避難）・住民孤立・救助活動終息・撤収・記録整理	住宅1階全体が長時間浸水し、住民は2階や屋根上に避難していた。救助活動・広域搬送・安否確認が完了し、現場では資機材撤収・記録整理・住民対応が進行中。現場の安全管理と住民・家族への説明が中心課題。	撤収時の安全管理、活動記録の正確な作成、住民・家族への説明体制強化、安否確認リストの整合性確保、関係機関との情報共有・連携、現場の立入規制・安全措置	平成30年7月豪雨（西日本豪雨）岡山県真備町で床上浸水・屋根上避難・孤立住民の救助活動終息後、撤収・記録整理・住民対応が重要課題となった事例あり。	['撤収作業中の隊員・住民の安全リスク', '資機材の紛失・損傷', '住民・家族への説明対応の遅延']	['感染症・衛生環境の悪化', '住民・家族の不安増大', '現場と本部間の情報伝達遅延']
		1-17	507.983	発災から83分	撤収作業の最終段階と安否確認リスト・記録の最終整理	消防	○○付近（住所：枚方市船橋本町一丁目874、UTM座標：〇〇〇〇〇〇）の現場で、救助隊・資機材の撤収が最終段階に入り、現場指揮本部より『安否確認リスト・活動記録の最終整理と本部への提出、現場立入規制の再確認を実施する』との通達。	撤収作業はほぼ完了しているが、住民や家族からの状況確認問い合わせが継続。警察・自衛隊・医療機関と連携し、住民名簿・安否リストの最終確定を進行中。道路名を聞かれた場合：「路線番号は不明ですが、○○小学校裏手の住宅地です」。	標高約12.5m、極めて緩やかな傾斜（平均0.6%）の低地で、淀川氾濫流が住宅地全体に広がりやすい。高台や迂回路がなく孤立化リスクが高い。	撤収段階での記録整理・安否確認体制の最終確認、住民・家族への説明体制、現場管理・情報共有の徹底訓練	現場活動が完全に終息し、撤収・記録整理・安否確認の最終段階。現場管理や住民・家族への説明、関係機関連携・情報伝達の正確性が訓練ポイント。	安否確認リスト・活動記録の確定・本部提出、現場立入規制の再確認、資機材の最終点検・搬出、住民・家族への最終説明・状況報告、関係機関との撤収・現場管理の調整、活動報告書の作成。	撤収作業中の事故・負傷、資機材の紛失・損傷、住民・家族への説明対応の遅延、安否確認リストや活動記録の整合性確保、関係機関との調整遅延、現場と本部間の情報伝達遅延	2.5m以上3.0m未満の浸水が住宅1階全体・屋根上避難が継続（24時間未満継続予想）	住宅被害（床上浸水・屋根上避難）・住民孤立・救助活動終息・撤収・記録整理	住宅1階全体が長時間浸水し、住民は2階や屋根上に避難していた。救助活動・広域搬送・安否確認が完了し、現場では資機材撤収・記録整理・住民対応が進行中。現場の安全管理と住民・家族への説明が中心課題。	撤収時の安全管理、活動記録の正確な作成、住民・家族への説明体制強化、安否確認リストの整合性確保、関係機関との情報共有・連携、現場の立入規制・安全措置	平成30年7月豪雨（西日本豪雨）岡山県真備町で床上浸水・屋根上避難・孤立住民の救助活動終息後、撤収・記録整理・住民対応が重要課題となった事例あり。	['撤収作業中の隊員・住民の安全リスク', '資機材の紛失・損傷', '住民・家族への説明対応の遅延']	['感染症・衛生環境の悪化', '住民・家族の不安増大', '現場と本部間の情報伝達遅延']
		1-18	507.983	発災から88分	現場閉鎖・管理引継ぎと問い合わせ対応窓口の設置	消防	○○付近（住所：枚方市船橋本町一丁目874、UTM座標：〇〇〇〇〇〇）の住宅地で、現場指揮本部より『全ての救助・安否確認・資機材撤収作業が完了し、現場は正式に閉鎖。今後は関係機関への現場管理の引継ぎと、住民・家族への最終状況説明および問い合わせ対応を実施する』との通達。	現地では撤収後も住民や家族からの問い合わせが断続的に続いているため、問い合わせ窓口を設置。警察・自衛隊・医療機関と最終的な現場管理の引継ぎ調整を行う。道路名を聞かれた場合：「路線番号は不明ですが、○○小学校裏手の住宅地です」。	標高約12.5m、極めて緩やかな傾斜（平均0.6%）の低地で、淀川氾濫流が住宅地全体に広がりやすい。高台や迂回路がなく孤立化リスクが高い。	救助・撤収作業の完全終息と現場閉鎖、現場管理の円滑な引継ぎ、住民・家族への最終説明体制の確認訓練	全作業完了後の現場閉鎖・管理引継ぎ。住民・家族への説明、問い合わせ対応、関係機関間の連携・情報共有の最終確認が訓練ポイント。	現場閉鎖の宣言、現場管理の関係機関（警察・自衛隊等）への正式な引継ぎ、問い合わせ窓口の設置・運用、住民・家族への最終状況説明、活動記録・報告書の本部提出、現場立入規制の維持。	現場閉鎖後の住民・家族からの問い合わせ対応遅延、現場管理引継ぎの不備、資機材や記録の紛失、現場立入規制の徹底不足、関係機関間の情報伝達の行き違い	2.5m以上3.0m未満の浸水が住宅1階全体・屋根上避難が継続（24時間未満継続予想）	住宅被害（床上浸水・屋根上避難）・住民孤立・救助活動終息・撤収・現場閉鎖	住宅1階全体が長時間浸水し、住民は2階や屋根上に避難していた。救助・搬送・安否確認・撤収作業が全て完了し、現場は閉鎖。今後は現場管理の関係機関への引継ぎと住民・家族への最終説明が必要。	撤収時の安全管理、現場管理の正式な引継ぎ体制、住民・家族への説明体制強化、問い合わせ窓口の設置、活動記録の正確な提出、現場立入規制の徹底、関係機関との情報共有	平成30年7月豪雨（西日本豪雨）岡山県真備町で床上浸水・屋根上避難・孤立住民の救助活動終息後、現場閉鎖・管理引継ぎ・住民対応が重要課題となった事例あり。	['現場閉鎖後の管理不備による安全リスク', '住民・家族への説明対応の遅延', '現場立入規制の徹底不足']	['感染症・衛生環境の悪化', '住民・家族の不安増大', '現場と本部間の情報伝達遅延']
		1-19	507.983	発災から93分	現場閉鎖後の住民・家族からの追加問い合わせと最終対応	住民	○○付近（住所：枚方市船橋本町一丁目874、UTM座標：〇〇〇〇〇〇）に住む家族や親族から、『救助された家族の所在が分からない』『現場の安全状況や立入可能か教えてほしい』などの問い合わせが災害対策本部や現場管理窓口に寄せられている。	現場管理は消防から警察・自治体に引き継がれており、問い合わせ窓口は市役所災害対策本部で継続運用中。避難所や安否確認リストは本部で一元管理。現場の立入は規制中。	標高約12.5m、極めて緩やかな傾斜（平均0.6%）の低地で、淀川氾濫流が住宅地全体に広がりやすい。高台や迂回路がなく孤立化リスクが高い。	現場閉鎖後の住民・家族対応、問い合わせ窓口運用訓練、安否確認リスト・避難所情報の一元管理・情報伝達体制の確認	救助・撤収作業が全て完了し現場閉鎖後、住民や家族から問い合わせが継続的に発生する状況を想定。問い合わせ窓口の設置・運用や、安否確認リスト・避難所情報の一元管理・情報伝達が訓練のポイント。	問い合わせ窓口での丁寧な対応、安否確認リストや避難所情報の確認・案内、現場立入規制や安全状況の説明、問い合わせ内容の記録、必要に応じて関係機関への連絡・調整。	問い合わせ件数の増加による対応遅延、情報伝達の行き違い、現場閉鎖後の立入希望者対応、安否確認リストの整合性維持、住民・家族の不安や混乱の拡大	2.5m以上3.0m未満の浸水が住宅1階全体・屋根上避難が継続（24時間未満継続予想）	住宅被害（床上浸水・屋根上避難）・住民孤立・現場閉鎖後の住民対応	住宅1階全体が長時間浸水し、住民は2階や屋根上に避難していた。救助・搬送・安否確認・撤収作業が全て完了し現場は閉鎖されたが、住民や家族からの安否や現場状況に関する問い合わせが続いている。現場管理は関係機関へ引継ぎ済み。	撤収後の問い合わせ窓口設置・運用、安否確認リスト・避難所情報の一元管理、現場立入規制の徹底、住民・家族への丁寧な説明体制、関係機関との情報共有、活動記録・問い合わせ記録の整備	平成30年7月豪雨（西日本豪雨）岡山県真備町などで、救助活動終息・現場閉鎖後も住民や家族からの問い合わせが殺到し、安否確認・情報提供体制の整備が課題となった事例あり。	['現場閉鎖後の管理不備による安全リスク', '住民・家族への説明対応の遅延', '安否確認リストの整合性不備']	['住民・家族の不安増大', '現場立入規制の徹底不足', '現場と本部間の情報伝達遅延']
		1-20	507.983	発災から98分	現場閉鎖後の追加問い合わせおよび最終状況整理	自治体職員	○○付近（住所：枚方市船橋本町一丁目874、UTM座標：〇〇〇〇〇〇）の現場閉鎖後、災害対策本部や問い合わせ窓口に『救助された家族の安否や搬送先、避難所での所在が分からない』『現場の立入可能時期や安全状況を知りたい』といった問い合わせが継続的に寄せられている。安否確認リストや避難所名簿との照合・整理が必要な状況。	現場管理は既に消防から警察・自治体に引き継がれており、問い合わせ窓口は市役所災害対策本部で運用中。避難所や安否確認リストは本部で一元管理。現場の立入は引き続き規制中。避難所には新たな住民の追加来所情報もあり。	標高約12.5m、極めて緩やかな傾斜（平均0.6%）の低地で、淀川氾濫流が住宅地全体に広がりやすい。高台や迂回路がなく孤立化リスクが高い。	現場閉鎖後の住民・家族対応、問い合わせ窓口体制の運用訓練、避難所名簿・安否確認リストの整合・再整理、住民・家族への説明体制強化	救助・撤収・現場閉鎖後も住民や家族からの問い合わせが継続。問い合わせ窓口の運用、名簿・安否確認リストの一元管理・整合性確保、住民・家族への説明・安心確保が訓練のポイント。	問い合わせ窓口での丁寧な対応、安否確認リストや避難所情報の照合・案内、現場立入規制や安全状況の説明、問い合わせ内容の記録、名簿不一致時の追加確認・調整、必要に応じて関係機関への連絡・調整。	問い合わせ件数の増加による対応遅延、名簿と安否確認リストの不一致・照合遅延、情報伝達の行き違い、現場閉鎖後の立入希望者対応、住民・家族の不安や混乱の拡大	2.5m以上3.0m未満の浸水が住宅1階全体・屋根上避難が継続（24時間未満継続予想）	住宅被害（床上浸水・屋根上避難）・住民孤立・現場閉鎖後の住民・家族対応	住宅1階全体が長時間浸水し、住民は2階や屋根上に避難していた。救助・搬送・安否確認・撤収作業が全て完了し現場は閉鎖されたが、住民や家族からの安否や現場状況に関する問い合わせが続いている。避難所への新規来所住民もあり、名簿・安否確認リストの照合が必要。	撤収後の問い合わせ窓口設置・運用、安否確認リスト・避難所情報の一元管理、現場立入規制の徹底、住民・家族への丁寧な説明体制、名簿・リストの整合性確保、関係機関との情報共有、活動記録・問い合わせ記録の整備	平成30年7月豪雨（西日本豪雨）岡山県真備町などで、救助活動終息・現場閉鎖後も住民や家族からの問い合わせが殺到し、安否確認・情報提供体制の整備が課題となった事例あり。	['現場閉鎖後の管理不備による安全リスク', '住民・家族への説明対応の遅延', '名簿・安否確認リストの整合性不備']	['住民・家族の不安増大', '現場立入規制の徹底不足', '現場と本部間の情報伝達遅延']
		1-21	507.983	発災から101分	現場閉鎖後の安否確認リスト・避難所情報の再照合および問い合わせ対応	自治体職員	○○付近（住所：枚方市船橋本町一丁目874、UTM座標：〇〇〇〇〇〇）の現場閉鎖後、災害対策本部や問い合わせ窓口に『避難した家族の安否や居場所が分からない』『避難所で会えない』などの問い合わせが引き続き寄せられている。安否確認リストや避難所名簿との照合・再整理を進めている。	現場管理は既に消防から警察・自治体に引き継がれており、問い合わせ窓口は市役所災害対策本部で継続運用中。避難所や安否確認リストは本部で一元管理。現場の立入は引き続き規制中。新たな避難所来所住民の情報もあり。	標高約12.5m、極めて緩やかな傾斜（平均0.6%）の低地で、淀川氾濫流が住宅地全体に広がりやすい。高台や迂回路がなく孤立化リスクが高い。	現場閉鎖後の住民・家族対応、問い合わせ窓口体制の運用訓練、避難所名簿・安否確認リストの整合・再整理、住民・家族への説明体制強化	救助・撤収・現場閉鎖後も住民や家族からの問い合わせが継続。問い合わせ窓口の運用、名簿・安否確認リストの一元管理・整合性確保、住民・家族への説明・安心確保が訓練のポイント。	問い合わせ窓口での丁寧な対応、安否確認リストや避難所情報の照合・案内、現場立入規制や安全状況の説明、問い合わせ内容の記録、名簿不一致時の追加確認・調整、必要に応じて関係機関への連絡・調整。	問い合わせ件数の増加による対応遅延、名簿と安否確認リストの不一致・照合遅延、情報伝達の行き違い、現場閉鎖後の立入希望者対応、住民・家族の不安や混乱の拡大	2.5m以上3.0m未満の浸水が住宅1階全体・屋根上避難が継続（24時間未満継続予想）	住宅被害（床上浸水・屋根上避難）・住民孤立・現場閉鎖後の住民対応	住宅1階全体が長時間浸水し、住民は2階や屋根上に避難していた。救助・搬送・安否確認・撤収作業が全て完了し現場は閉鎖されたが、住民や家族からの安否や現場状況に関する問い合わせが続いている。避難所への新規来所住民もあり、名簿・安否確認リストの照合が必要。	撤収後の問い合わせ窓口設置・運用、安否確認リスト・避難所情報の一元管理、現場立入規制の徹底、住民・家族への丁寧な説明体制、名簿・リストの整合性確保、関係機関との情報共有、活動記録・問い合わせ記録の整備	平成30年7月豪雨（西日本豪雨）岡山県真備町などで、救助活動終息・現場閉鎖後も住民や家族からの問い合わせが殺到し、安否確認・情報提供体制の整備が課題となった事例あり。	['現場閉鎖後の管理不備による安全リスク', '住民・家族への説明対応の遅延', '名簿・安否確認リストの整合性不備']	['住民・家族の不安増大', '現場立入規制の徹底不足', '現場と本部間の情報伝達遅延']
		1-22	507.983	発災から106分	現場閉鎖後の問い合わせ内容の追加整理と避難所情報の再確認（続報）	自治体職員	○○付近（住所：枚方市船橋本町一丁目874、UTM座標：〇〇〇〇〇〇）の現場閉鎖後、災害対策本部や問い合わせ窓口に引き続き『避難した家族の安否や居場所が分からない』『避難所で会えない』『新たに避難所に到着した住民の情報がある』などの問い合わせ・追加情報が寄せられている。避難所名簿・安否確認リストとの照合・再整理を継続中。	現場管理は既に消防から警察・自治体に引き継がれており、問い合わせ窓口は市役所災害対策本部で継続運用中。現場の立入は引き続き規制中。避難所には新たな住民の追加来所情報もあり。避難所間の移動や名簿記載漏れも確認されている。	標高約12.5m、極めて緩やかな傾斜（平均0.6%）の低地で、淀川氾濫流が住宅地全体に広がりやすい。高台や迂回路がなく孤立化リスクが高い。	現場閉鎖後の住民・家族対応、問い合わせ窓口運用訓練、避難所名簿・安否確認リストの整合・再整理、住民・家族への説明体制強化	救助・撤収・現場閉鎖後も住民や家族からの問い合わせが継続。問い合わせ窓口の運用、名簿・安否確認リストの一元管理・整合性確保、住民・家族への説明・安心確保、避難所間移動や新規来所情報の追加整理が訓練のポイント。	問い合わせ窓口での丁寧な対応、安否確認リストや避難所情報の照合・案内、現場立入規制や安全状況の説明、問い合わせ内容の記録、名簿不一致時の追加確認・調整、避難所間の情報共有、必要に応じて関係機関への連絡・調整。	問い合わせ件数の増加による対応遅延、名簿と安否確認リストの不一致・照合遅延、避難所間の情報共有不足、情報伝達の行き違い、現場閉鎖後の立入希望者対応、住民・家族の不安や混乱の拡大	2.5m以上3.0m未満の浸水が住宅1階全体・屋根上避難が継続（24時間未満継続予想）	住宅被害（床上浸水・屋根上避難）・住民孤立・現場閉鎖後の住民対応	住宅1階全体が長時間浸水し、住民は2階や屋根上に避難していた。救助・搬送・安否確認・撤収作業が全て完了し現場は閉鎖されたが、住民や家族からの安否や現場状況に関する問い合わせが続いている。避難所への新規来所住民もあり、名簿・安否確認リストの照合が必要。避難所間の移動や名簿記載漏れも発生している。	撤収後の問い合わせ窓口設置・運用、安否確認リスト・避難所情報の一元管理、現場立入規制の徹底、住民・家族への丁寧な説明体制、名簿・リストの整合性確保、避難所間の情報共有体制強化、関係機関との情報共有、活動記録・問い合わせ記録の整備	平成30年7月豪雨（西日本豪雨）岡山県真備町などで、救助活動終息・現場閉鎖後も住民や家族からの問い合わせが殺到し、安否確認・情報提供体制の整備や避難所間の情報共有が課題となった事例あり。	['現場閉鎖後の管理不備による安全リスク', '住民・家族への説明対応の遅延', '名簿・安否確認リストの整合性不備', '避難所間の情報共有不足']	['住民・家族の不安増大', '現場立入規制の徹底不足', '現場と本部間の情報伝達遅延']
		1-23	507.983	発災から111分	現場閉鎖後の問い合わせ内容の追加整理・避難所情報の再照合（続報）	自治体職員	○○付近（住所：枚方市船橋本町一丁目874、UTM座標：〇〇〇〇〇〇）の現場閉鎖後、災害対策本部や問い合わせ窓口に引き続き『避難した家族の安否や居場所が分からない』『避難所で会えない』『避難所に新たに到着した住民の情報がある』等の問い合わせや追加情報が寄せられている。避難所名簿や安否確認リストとの照合・再整理を続行中。	現場管理は既に消防から警察・自治体に引き継がれている。問い合わせ窓口は市役所災害対策本部で運用中。避難所には新たな住民の追加来所情報もあり、避難所間の移動や名簿記載漏れも散見されている。	標高約12.5m、極めて緩やかな傾斜（平均0.6%）の低地で、淀川氾濫流が住宅地全体に広がりやすい。高台や迂回路がなく孤立化リスクが高い。	現場閉鎖後の住民・家族対応、問い合わせ窓口運用訓練、避難所名簿・安否確認リストの整合・再整理、住民・家族への説明体制強化	救助・撤収・現場閉鎖後も住民や家族からの問い合わせが継続。問い合わせ窓口の運用、名簿・安否確認リストの一元管理・整合性確保、住民・家族への説明・安心確保、避難所間移動や新規来所情報の追加整理が訓練のポイント。	問い合わせ窓口での丁寧な対応、安否確認リストや避難所情報の照合・案内、現場立入規制や安全状況の説明、問い合わせ内容の記録、名簿不一致時の追加確認・調整、避難所間の情報共有、必要に応じて関係機関への連絡・調整。	問い合わせ件数の増加による対応遅延、名簿と安否確認リストの不一致・照合遅延、避難所間の情報共有不足、情報伝達の行き違い、現場閉鎖後の立入希望者対応、住民・家族の不安や混乱の拡大	2.5m以上3.0m未満の浸水が住宅1階全体・屋根上避難が継続（24時間未満継続予想）	住宅被害（床上浸水・屋根上避難）・住民孤立・現場閉鎖後の住民対応	住宅1階全体が長時間浸水し、住民は2階や屋根上に避難していた。救助・搬送・安否確認・撤収作業が全て完了し現場は閉鎖されたが、住民や家族からの安否や現場状況に関する問い合わせが続いている。避難所への新規来所住民もあり、名簿・安否確認リストの照合が必要。避難所間の移動や名簿記載漏れも発生している。	撤収後の問い合わせ窓口設置・運用、安否確認リスト・避難所情報の一元管理、現場立入規制の徹底、住民・家族への丁寧な説明体制、名簿・リストの整合性確保、避難所間の情報共有体制強化、関係機関との情報共有、活動記録・問い合わせ記録の整備	平成30年7月豪雨（西日本豪雨）岡山県真備町などで、救助活動終息・現場閉鎖後も住民や家族からの問い合わせが殺到し、安否確認・情報提供体制の整備や避難所間の情報共有が課題となった事例あり。	['現場閉鎖後の管理不備による安全リスク', '住民・家族への説明対応の遅延', '名簿・安否確認リストの整合性不備', '避難所間の情報共有不足']	['住民・家族の不安増大', '現場立入規制の徹底不足', '現場と本部間の情報伝達遅延']
		1-24	507.983	発災から118分	現場閉鎖後の問い合わせ内容の追加整理・避難所情報の再照合（続報）	自治体職員	○○付近（住所：枚方市船橋本町一丁目874、UTM座標：〇〇〇〇〇〇）の現場閉鎖後、災害対策本部や問い合わせ窓口に引き続き『避難した家族の安否や居場所が分からない』『避難所で会えない』『避難所に新たに到着した住民の情報がある』等の問い合わせや追加情報が寄せられている。避難所名簿や安否確認リストとの照合・再整理を続行中。	現場管理は既に消防から警察・自治体に引き継がれている。問い合わせ窓口は市役所災害対策本部で運用中。避難所には新たな住民の追加来所情報もあり、避難所間の移動や名簿記載漏れも散見されている。	標高約12.5m、極めて緩やかな傾斜（平均0.6%）の低地で、淀川氾濫流が住宅地全体に広がりやすい。高台や迂回路がなく孤立化リスクが高い。	現場閉鎖後の住民・家族対応、問い合わせ窓口運用訓練、避難所名簿・安否確認リストの整合・再整理、住民・家族への説明体制強化	救助・撤収・現場閉鎖後も住民や家族からの問い合わせが継続。問い合わせ窓口の運用、名簿・安否確認リストの一元管理・整合性確保、住民・家族への説明・安心確保、避難所間移動や新規来所情報の追加整理が訓練のポイント。	問い合わせ窓口での丁寧な対応、安否確認リストや避難所情報の照合・案内、現場立入規制や安全状況の説明、問い合わせ内容の記録、名簿不一致時の追加確認・調整、避難所間の情報共有、必要に応じて関係機関への連絡・調整。	問い合わせ件数の増加による対応遅延、名簿と安否確認リストの不一致・照合遅延、避難所間の情報共有不足、情報伝達の行き違い、現場閉鎖後の立入希望者対応、住民・家族の不安や混乱の拡大	2.5m以上3.0m未満の浸水が住宅1階全体・屋根上避難が継続（24時間未満継続予想）	住宅被害（床上浸水・屋根上避難）・住民孤立・現場閉鎖後の住民対応	住宅1階全体が長時間浸水し、住民は2階や屋根上に避難していた。救助・搬送・安否確認・撤収作業が全て完了し現場は閉鎖されたが、住民や家族からの安否や現場状況に関する問い合わせが続いている。避難所への新規来所住民もあり、名簿・安否確認リストの照合が必要。避難所間の移動や名簿記載漏れも発生している。	撤収後の問い合わせ窓口設置・運用、安否確認リスト・避難所情報の一元管理、現場立入規制の徹底、住民・家族への丁寧な説明体制、名簿・リストの整合性確保、避難所間の情報共有体制強化、関係機関との情報共有、活動記録・問い合わせ記録の整備	平成30年7月豪雨（西日本豪雨）岡山県真備町などで、救助活動終息・現場閉鎖後も住民や家族からの問い合わせが殺到し、安否確認・情報提供体制の整備や避難所間の情報共有が課題となった事例あり。	['現場閉鎖後の管理不備による安全リスク', '住民・家族への説明対応の遅延', '名簿・安否確認リストの整合性不備', '避難所間の情報共有不足']	['住民・家族の不安増大', '現場立入規制の徹底不足', '現場と本部間の情報伝達遅延']
		1-25	507.983	発災から121分	現場閉鎖後の問い合わせ内容の追加整理・避難所情報の再照合（続報）	自治体職員	○○付近（住所：枚方市船橋本町一丁目874、UTM座標：〇〇〇〇〇〇）の現場閉鎖後、災害対策本部や問い合わせ窓口に『避難した家族の安否や居場所が分からない』『避難所で会えない』『避難所に新たに到着した住民の情報がある』等の問い合わせや追加情報が引き続き寄せられている。避難所名簿や安否確認リストとの照合・再整理を続行中。	現場管理は既に消防から警察・自治体に引き継がれている。問い合わせ窓口は市役所災害対策本部で運用中。避難所には新たな住民の追加来所情報もあり、避難所間の移動や名簿記載漏れも散見されている。	標高約12.5m、極めて緩やかな傾斜（平均0.6%）の低地で、淀川氾濫流が住宅地全体に広がりやすい。高台や迂回路がなく孤立化リスクが高い。	現場閉鎖後の住民・家族対応、問い合わせ窓口運用訓練、避難所名簿・安否確認リストの整合・再整理、住民・家族への説明体制強化	救助・撤収・現場閉鎖後も住民や家族からの問い合わせが継続。問い合わせ窓口の運用、名簿・安否確認リストの一元管理・整合性確保、住民・家族への説明・安心確保、避難所間移動や新規来所情報の追加整理が訓練のポイント。	問い合わせ窓口での丁寧な対応、安否確認リストや避難所情報の照合・案内、現場立入規制や安全状況の説明、問い合わせ内容の記録、名簿不一致時の追加確認・調整、避難所間の情報共有、必要に応じて関係機関への連絡・調整。	問い合わせ件数の増加による対応遅延、名簿と安否確認リストの不一致・照合遅延、避難所間の情報共有不足、情報伝達の行き違い、現場閉鎖後の立入希望者対応、住民・家族の不安や混乱の拡大	2.5m以上3.0m未満の浸水が住宅1階全体・屋根上避難が継続（24時間未満継続予想）	住宅被害（床上浸水・屋根上避難）・住民孤立・現場閉鎖後の住民対応	住宅1階全体が長時間浸水し、住民は2階や屋根上に避難していた。救助・搬送・安否確認・撤収作業が全て完了し現場は閉鎖されたが、住民や家族からの安否や現場状況に関する問い合わせが続いている。避難所への新規来所住民もあり、名簿・安否確認リストの照合が必要。避難所間の移動や名簿記載漏れも発生している。	撤収後の問い合わせ窓口設置・運用、安否確認リスト・避難所情報の一元管理、現場立入規制の徹底、住民・家族への丁寧な説明体制、名簿・リストの整合性確保、避難所間の情報共有体制強化、関係機関との情報共有、活動記録・問い合わせ記録の整備	平成30年7月豪雨（西日本豪雨）岡山県真備町などで、救助活動終息・現場閉鎖後も住民や家族からの問い合わせが殺到し、安否確認・情報提供体制の整備や避難所間の情報共有が課題となった事例あり。	['現場閉鎖後の管理不備による安全リスク', '住民・家族への説明対応の遅延', '名簿・安否確認リストの整合性不備', '避難所間の情報共有不足']	['住民・家族の不安増大', '現場立入規制の徹底不足', '現場と本部間の情報伝達遅延']
		1-26	507.983	発災から128分	現場閉鎖後の問い合わせ対応と避難所名簿・安否確認リストの再照合（続報）	自治体職員	○○付近（住所：枚方市船橋本町一丁目874、UTM座標：〇〇〇〇〇〇）の現場閉鎖後、災害対策本部や問い合わせ窓口に『避難した家族の安否や居場所が分からない』『避難所で会えない』『避難所に新たに到着した住民の情報がある』等の問い合わせや追加情報が継続して寄せられている。避難所名簿や安否確認リストとの照合・再整理を続行中。	現場管理は既に消防から警察・自治体に引き継がれている。問い合わせ窓口は市役所災害対策本部で運用中。避難所には新たな住民の追加来所情報もあり、避難所間の移動や名簿記載漏れも散見されている。健康観察の追加要請がある場合は医療スタッフの増員も検討。	標高約12.5m、極めて緩やかな傾斜（平均0.6%）の低地で、淀川氾濫流が住宅地全体に広がりやすい。高台や迂回路がなく孤立化リスクが高い。	現場閉鎖後の住民・家族対応、問い合わせ窓口運用訓練、避難所名簿・安否確認リストの整合・再整理、住民・家族への説明体制強化、健康観察体制の拡充	救助・撤収・現場閉鎖後も住民や家族からの問い合わせが継続。問い合わせ窓口の運用、名簿・安否確認リストの一元管理・整合性確保、住民・家族への説明・安心確保、避難所間移動や新規来所情報の追加整理、健康観察体制の強化が訓練のポイント。	問い合わせ窓口での丁寧な対応、安否確認リストや避難所情報の照合・案内、現場立入規制や安全状況の説明、問い合わせ内容の記録、名簿不一致時の追加確認・調整、避難所間の情報共有、健康観察の追加実施と記録、必要に応じて関係機関への連絡・調整。	問い合わせ件数の増加による対応遅延、名簿と安否確認リストの不一致・照合遅延、避難所間の情報共有不足、健康観察の人員・資材不足、情報伝達の行き違い、現場閉鎖後の立入希望者対応、住民・家族の不安や混乱の拡大	2.5m以上3.0m未満の浸水が住宅1階全体・屋根上避難が継続（24時間未満継続予想）	住宅被害（床上浸水・屋根上避難）・住民孤立・現場閉鎖後の住民対応・避難所健康観察	住宅1階全体が長時間浸水し、住民は2階や屋根上に避難していた。救助・搬送・安否確認・撤収作業が全て完了し現場は閉鎖されたが、住民や家族からの安否や現場状況に関する問い合わせが続いている。避難所への新規来所住民もあり、名簿・安否確認リストの照合が必要。避難所間の移動や名簿記載漏れ、健康観察要請の追加も発生している。	撤収後の問い合わせ窓口設置・運用、安否確認リスト・避難所情報の一元管理、現場立入規制の徹底、住民・家族への丁寧な説明体制、名簿・リストの整合性確保、避難所間の情報共有体制強化、健康観察・医療スタッフの増員、関係機関との情報共有、活動記録・問い合わせ記録の整備	平成30年7月豪雨（西日本豪雨）岡山県真備町などで、救助活動終息・現場閉鎖後も住民や家族からの問い合わせが殺到し、安否確認・情報提供体制や避難所内の健康観察体制の整備が課題となった事例あり。感染症疑い者の隔離・衛生管理の遅れが混乱を招いた例も報告されている。	['現場閉鎖後の管理不備による安全リスク', '住民・家族への説明対応の遅延', '名簿・安否確認リストの整合性不備', '避難所間の情報共有不足', '避難所での健康急変・感染症拡大']	['住民・家族の不安増大', '現場立入規制の徹底不足', '現場と本部間の情報伝達遅延', '避難所内でのパニック・混乱拡大', '医療資材・人員の不足による二次的健康被害']
		1-27	507.983	発災から134分	避難所・問い合わせ窓口での追加問い合わせ・健康観察要請（続報）	自治体職員	○○付近（住所：枚方市船橋本町一丁目874、UTM座標：〇〇〇〇〇〇）の現場閉鎖後、災害対策本部や問い合わせ窓口に『避難した家族の安否や居場所が分からない』『避難所で会えない』『新たに避難所に到着した住民の情報がある』『体調不良の高齢者がいる』等の問い合わせや追加情報が引き続き寄せられている。避難所名簿や安否確認リストとの照合・再整理、健康観察体制の追加強化が求められている。	問い合わせ窓口は市役所災害対策本部で運用中。避難所には新たな住民の追加来所や体調不良者の発生もあり、避難所間の移動や名簿記載漏れも見受けられる。医療スタッフの増員要請あり。	標高約12.5m、極めて緩やかな傾斜（平均0.6%）の低地で、淀川氾濫流が住宅地全体に広がりやすい。高台や迂回路がなく孤立化リスクが高い。長時間の浸水により避難・救助活動は終息したが、避難所運営や住民対応の課題が継続。	現場閉鎖後の住民・家族対応、問い合わせ窓口運用訓練、避難所名簿・安否確認リストの整合・再整理、健康観察体制の拡充、住民・家族への説明体制強化	救助・撤収・現場閉鎖後も住民や家族からの問い合わせが継続。問い合わせ窓口の運用、名簿・安否確認リストの一元管理・整合性確保、健康観察体制強化、避難所間移動や新規来所情報の追加整理が訓練のポイント。近隣避難所でも夜間の体調不良者発生が報告されており、健康観察・医療対応の拡充が必要。	問い合わせ窓口での丁寧な対応、安否確認リストや避難所情報の照合・案内、現場立入規制や安全状況の説明、問い合わせ内容の記録、名簿不一致時の追加確認・調整、避難所間の情報共有、健康観察の追加実施と記録、医療スタッフの増員調整、必要に応じて関係機関への連絡・調整	問い合わせ件数の増加による対応遅延、名簿と安否確認リストの不一致・照合遅延、避難所間の情報共有不足、健康観察の人員・資材不足、情報伝達の行き違い、現場閉鎖後の立入希望者対応、住民・家族の不安や混乱の拡大、体調不良者の重症化や感染症リスク	2.5m以上3.0m未満の浸水が住宅1階全体・屋根上避難が継続（24時間未満継続予想）	住宅被害（床上浸水・屋根上避難）・住民孤立・現場閉鎖後の住民対応・避難所健康観察	住宅1階全体が長時間浸水し、住民は2階や屋根上に避難していた。救助・搬送・安否確認・撤収作業が全て完了し現場は閉鎖されたが、住民や家族からの安否や現場状況に関する問い合わせが続いている。避難所への新規来所住民や体調不良者も発生し、名簿・安否確認リストの照合や健康観察体制の強化が求められている。	撤収後の問い合わせ窓口設置・運用、安否確認リスト・避難所情報の一元管理、現場立入規制の徹底、住民・家族への丁寧な説明体制、名簿・リストの整合性確保、避難所間の情報共有体制強化、健康観察・医療スタッフの増員、感染症対策（隔離・消毒・換気）、関係機関との情報共有、活動記録・問い合わせ記録の整備	平成30年7月豪雨（西日本豪雨）岡山県真備町などで、救助活動終息・現場閉鎖後も住民や家族からの問い合わせや避難所内の健康観察・感染症対応が課題となった事例あり。夜間の体調不良者増加や衛生資材・人員不足による混乱の記録もある。	['現場閉鎖後の管理不備による安全リスク', '住民・家族への説明対応の遅延', '名簿・安否確認リストの整合性不備', '避難所間の情報共有不足', '避難所での健康急変・感染症拡大']	['住民・家族の不安増大', '現場立入規制の徹底不足', '現場と本部間の情報伝達遅延', '避難所内でのパニック・混乱拡大', '医療資材・人員の不足による二次的健康被害']
		1-28	507.983	発災から139分	避難所・問い合わせ窓口での追加問い合わせ・健康観察強化要請（夜間体制の逼迫）	自治体職員	○○付近（住所：枚方市船橋本町一丁目874、UTM座標：〇〇〇〇〇〇）の災害対策本部や問い合わせ窓口に『避難した家族の安否や居場所が分からない』『避難所で会えない』『新たに避難所に到着した住民の情報がある』『夜間に発熱や咳を訴える住民が複数発生し、健康観察・隔離体制が限界に近い』等の問い合わせや追加情報が引き続き寄せられている。避難所名簿や安否確認リストとの照合・再整理、夜間の健康観察・医療スタッフ体制の追加強化が求められている。	問い合わせ窓口は市役所災害対策本部で運用中。避難所には新たな住民の追加来所や体調不良者の発生もあり、避難所間の移動や名簿記載漏れも見受けられる。医療スタッフの夜間増員要請あり。近隣避難所でも夜間体調不良者の追加発生が報告されている。	標高約12.5m、極めて緩やかな傾斜（平均0.6%）の低地で、淀川氾濫流が住宅地全体に広がりやすい。高台や迂回路がなく孤立化リスクが高い。長時間の浸水により避難・救助活動は終息したが、避難所運営や住民対応の課題が継続。	現場閉鎖後の住民・家族対応、問い合わせ窓口運用訓練、避難所名簿・安否確認リストの整合・再整理、健康観察体制の夜間強化、住民・家族への説明体制強化	夜間に体調不良者が連続発生し、健康観察・隔離スペース・医療スタッフともに限界。追加の隔離スペース設営や夜間医療体制の維持、住民説明・不安対応、名簿・健康観察記録管理が訓練ポイント。	問い合わせ窓口での丁寧な対応、安否確認リストや避難所情報の照合・案内、現場立入規制や安全状況の説明、問い合わせ内容の記録、名簿不一致時の追加確認・調整、避難所間の情報共有、健康観察の追加実施と記録、医療スタッフの夜間増員調整、必要に応じて関係機関への連絡・調整	問い合わせ件数の増加による対応遅延、名簿と安否確認リストの不一致・照合遅延、避難所間の情報共有不足、健康観察の人員・資材不足、夜間の医療体制逼迫、情報伝達の行き違い、現場閉鎖後の立入希望者対応、住民・家族の不安や混乱の拡大、体調不良者の重症化や感染症リスク	2.5m以上3.0m未満の浸水が住宅1階全体・屋根上避難が継続（24時間未満継続予想）	住宅被害（床上浸水・屋根上避難）・住民孤立・現場閉鎖後の住民対応・避難所健康観察・夜間体制逼迫	住宅1階全体が長時間浸水し、住民は2階や屋根上に避難していた。救助・搬送・安否確認・撤収作業が全て完了し現場は閉鎖されたが、住民や家族からの安否や現場状況に関する問い合わせが続いている。避難所への新規来所住民や体調不良者も発生し、名簿・安否確認リストの照合や健康観察体制の強化、夜間対応の逼迫が課題。	撤収後の問い合わせ窓口設置・運用、安否確認リスト・避難所情報の一元管理、現場立入規制の徹底、住民・家族への丁寧な説明体制、名簿・リストの整合性確保、避難所間の情報共有体制強化、健康観察・医療スタッフの夜間増員、感染症対策（隔離・消毒・換気）、関係機関との情報共有、活動記録・問い合わせ記録の整備	平成30年7月豪雨（西日本豪雨）岡山県真備町などで、救助活動終息・現場閉鎖後も住民や家族からの問い合わせや避難所内の健康観察・感染症対応が課題となった事例あり。夜間の体調不良者増加や衛生資材・人員不足による混乱の記録もある。	['現場閉鎖後の管理不備による安全リスク', '住民・家族への説明対応の遅延', '名簿・安否確認リストの整合性不備', '避難所間の情報共有不足', '避難所での健康急変・感染症拡大', '夜間の医療体制逼迫']	['住民・家族の不安増大', '現場立入規制の徹底不足', '現場と本部間の情報伝達遅延', '避難所内でのパニック・混乱拡大', '医療資材・人員の不足による二次的健康被害']
		1-29	507.983	発災から142分	避難所・問い合わせ窓口での夜間体調不良者追加発生・医療体制限界への対応要請	自治体職員	○○付近（住所：枚方市船橋本町一丁目874、UTM座標：〇〇〇〇〇〇）の災害対策本部や問い合わせ窓口に『避難所で新たな体調不良者が発生した』『隔離スペースが満床で追加の医療スタッフ・衛生資材が至急必要』『夜間の健康観察体制が逼迫している』等の問い合わせ・要請が続いている。複数の避難所からも同様の連絡が相次ぎ、夜間の医療対応体制の強化が求められている。	夜間のため避難所職員・医療スタッフとも人員が限られており、医療機関搬送は翌朝以降を予定。症状者は発熱・咳・倦怠感等で、家族や他の避難者との動線分離が必要。自治体本部・医療機関には追加連絡済み。	標高約12.5m、極めて緩やかな傾斜（平均0.6%）の低地で、淀川氾濫流が住宅地全体に広がりやすい。高台や迂回路がなく孤立化リスクが高い。長時間の浸水により避難・救助活動は終息したが、避難所運営や住民対応の課題が継続。	現場閉鎖後の夜間住民・家族対応、健康観察・医療体制の逼迫時の追加資機材・人員要請、避難所間連携と記録管理、住民説明・不安対応の訓練	夜間に体調不良者が連続発生し、隔離スペース・医療スタッフ・衛生資材とも限界。追加スペース設営や夜間医療体制維持、住民説明・不安対応、名簿・健康観察記録管理が訓練ポイント。	問い合わせ窓口での丁寧な対応、安否確認リストや避難所情報の照合・案内、健康観察体制の夜間強化、追加隔離スペース・資機材・医療スタッフの派遣要請、住民・家族への状況説明、避難所間の情報共有、記録管理の徹底、必要に応じて関係機関への連絡・調整	問い合わせ件数の増加による対応遅延、名簿・安否確認リストの不一致・照合遅延、避難所間の情報共有不足、健康観察・医療スタッフの夜間人員・資材不足、体調不良者の重症化・感染症リスク、住民・家族の不安や混乱の拡大、夜間対応の限界	2.5m以上3.0m未満の浸水が住宅1階全体・屋根上避難が継続（24時間未満継続予想）	住宅被害（床上浸水・屋根上避難）・住民孤立・現場閉鎖後の住民対応・避難所健康観察・夜間体制逼迫	住宅1階全体が長時間浸水し、住民は2階や屋根上に避難していた。救助・搬送・安否確認・撤収作業が全て完了し現場は閉鎖されたが、夜間に避難所で新たな体調不良者が複数発生し、隔離スペースや医療スタッフ体制が限界に近い。住民・家族からの問い合わせや不安も増大しており、夜間の健康観察・医療体制の強化が必要。	撤収後の問い合わせ窓口設置・運用、安否確認リスト・避難所情報の一元管理、現場立入規制の徹底、住民・家族への丁寧な説明体制、名簿・リストの整合性確保、避難所間の情報共有体制強化、健康観察・医療スタッフの夜間増員、感染症対策（隔離・消毒・換気）、衛生資材の迅速補給、関係機関との情報共有、活動記録・問い合わせ記録の整備	平成30年7月豪雨（西日本豪雨）岡山県真備町などで、救助活動終息・現場閉鎖後も住民や家族からの問い合わせや避難所内の健康観察・感染症対応が課題となった事例あり。夜間の体調不良者増加や衛生資材・人員不足による混乱の記録もある。	['現場閉鎖後の管理不備による安全リスク', '住民・家族への説明対応の遅延', '名簿・安否確認リストの整合性不備', '避難所間の情報共有不足', '避難所での健康急変・感染症拡大', '夜間の医療体制逼迫']	['住民・家族の不安増大', '現場立入規制の徹底不足', '現場と本部間の情報伝達遅延', '避難所内でのパニック・混乱拡大', '医療資材・人員の不足による二次的健康被害']
		1-30	507.983	発災から147分	夜間の避難所における体調不良者追加発生・隔離スペース・医療スタッフ逼迫への緊急対応要請	自治体職員	○○付近（住所：枚方市船橋本町一丁目874、UTM座標：〇〇〇〇〇〇）の災害対策本部や問い合わせ窓口に、夜間巡回中の避難所職員から『新たに発熱や咳、頭痛等を訴える住民が2名発生し、既存の隔離スペースが満床となった。医療スタッフの対応体制も限界に近く、追加の医療スタッフ・衛生資材の緊急派遣を要請したい』との報告が入った。	新たな体調不良者は高齢女性1名と小児1名。夜間のため医療機関への搬送は翌朝以降を調整予定。家族は同避難所内に同伴。医療スタッフ・衛生資材の追加派遣要請済み。近隣避難所でも同様の体調不良者追加発生が報告されている。	標高約12.5m、極めて緩やかな傾斜（平均0.6%）の低地。淀川氾濫流が住宅地・避難所全体に広がりやすく、長時間の排水困難・孤立化リスクが非常に高い。避難所も低地部に立地し、長時間の避難生活による健康リスクが高まる。	夜間の避難所運営における体調急変・感染症疑い時の医療スタッフ緊急増員要請、隔離スペースの拡張判断、住民説明・不安対応、夜間体制維持・記録管理の訓練	夜間に体調不良者が連続発生し、隔離スペース・医療スタッフ・衛生資材ともに限界。追加隔離スペース設営や医療スタッフの緊急増員要請、住民説明・不安対応、名簿・健康観察記録管理が訓練ポイント。近隣避難所でも同様の逼迫状況。	夜間の体調不良者への応急対応、追加隔離スペースの即時設営検討、医療スタッフの夜間増員要請、衛生資材の迅速補給、症状者の経過観察記録、住民・家族への状況説明と不安対応、名簿・健康観察記録の更新、避難所間・自治体本部・医療機関との情報共有	隔離スペース・医療資材の物理的限界、夜間の人員・医療資材不足、体調不良者の重症化リスク、住民・家族の不安拡大、夜間の記録管理や名簿更新の遅延、感染拡大防止の徹底困難、問い合わせ件数増加による対応遅延	2.5m以上3.0m未満の浸水が住宅1階全体・屋根上避難が継続（24時間未満継続予想）	避難所運営・健康被害・感染症対策・夜間対応	避難所での長時間滞在・密集状態により、夜間に体調不良者がさらに追加発生。既存の隔離スペースが満床となり、医療スタッフ体制も限界。自治体本部へ緊急増員要請を行う事態となり、住民・家族の不安や混乱も拡大しやすい状況。	夜間も含めた定期的な健康観察・体調管理、感染症対策（隔離・消毒・換気・動線分離）、医療スタッフ・保健師の夜間シフト体制、衛生資材の十分な備蓄・迅速補給、住民説明・安心確保の体制強化、名簿・健康観察記録の徹底、追加スペース転用の事前マニュアル整備	平成30年7月豪雨（西日本豪雨）岡山県真備町などで、避難所内での感染症疑い・健康急変事案が多発し、夜間の医療体制や衛生資材不足、住民説明体制の課題が指摘された。	['避難所内での健康急変・感染症拡大', '体調不良者の重症化・医療搬送遅延', '名簿管理・健康観察の遅延', '住民の不安・混乱拡大']	['避難所内のパニック・不安拡大', '感染症の集団発生による避難所閉鎖リスク', '医療機関の受入超過・連携遅延', '衛生資材不足による二次的健康被害']
		1-31	507.983	発災から153分	夜間の避難所での体調不良者（発熱・咳）追加発生と隔離スペース・医療スタッフの更なる逼迫	自治体職員	○○付近（住所：枚方市船橋本町一丁目874、UTM座標：〇〇〇〇〇〇）の避難所から、夜間の見回り中にさらに2名（成人男性1名・高齢女性1名）が発熱・咳・倦怠感を訴えた。既存の隔離スペースは満床となっており、追加の隔離スペース設営と医療スタッフ・衛生資材の緊急増員を至急要請したいとの連絡が災害対策本部に入った。	新たな体調不良者は成人男性と高齢女性。家族は同避難所内に同伴。夜間のため医療機関への搬送は翌朝以降を調整予定。近隣避難所でも同様の体調不良者追加発生が報告されている。	標高約12.5m、極めて緩やかな傾斜（平均0.6%）の低地。淀川氾濫流が住宅地・避難所全体に広がりやすく、長時間の排水困難・孤立化リスクが非常に高い。避難所も低地部に立地し、長時間の避難生活による健康リスクが高まる。	夜間の避難所運営における体調急変・感染症疑い時の医療スタッフ緊急増員要請、隔離スペースの拡張判断、住民説明・不安対応、夜間体制維持・記録管理の訓練	夜間に体調不良者が連続発生し、隔離スペース・医療スタッフ・衛生資材ともに限界。追加隔離スペース設営や医療スタッフの緊急増員要請、住民説明・不安対応、名簿・健康観察記録管理が訓練ポイント。近隣避難所でも同様の逼迫状況。	夜間の体調不良者への応急対応、体育館倉庫や廊下区画等を転用した追加隔離スペースの即時設営検討、医療スタッフの夜間増員要請、衛生資材の迅速補給、症状者の経過観察記録、住民・家族への状況説明と不安対応、名簿・健康観察記録の更新、避難所間・自治体本部・医療機関との情報共有	隔離スペース・医療資材の物理的限界、夜間の人員・医療資材不足、体調不良者の重症化リスク、住民・家族の不安拡大、夜間の記録管理や名簿更新の遅延、感染拡大防止の徹底困難、問い合わせ件数増加による対応遅延	2.5m以上3.0m未満の浸水が住宅1階全体・屋根上避難が継続（24時間未満継続予想）	避難所運営・健康被害・感染症対策・夜間対応	避難所での長時間滞在・密集状態により、夜間に体調不良者がさらに追加発生。既存の隔離スペースが満床となり、医療スタッフ体制も限界。自治体本部へ緊急増員要請を行う事態となり、住民・家族の不安や混乱も拡大しやすい状況。	夜間も含めた定期的な健康観察・体調管理、感染症対策（隔離・消毒・換気・動線分離）、医療スタッフ・保健師の夜間シフト体制、衛生資材の十分な備蓄・迅速補給、住民説明・安心確保の体制強化、名簿・健康観察記録の徹底、追加スペース転用の事前マニュアル整備	平成30年7月豪雨（西日本豪雨）岡山県真備町などで、避難所内での感染症疑い・健康急変事案が多発し、夜間の医療体制や衛生資材不足、住民説明体制の課題が指摘された。	['避難所内での健康急変・感染症拡大', '体調不良者の重症化・医療搬送遅延', '名簿管理・健康観察の遅延', '住民の不安・混乱拡大']	['避難所内のパニック・不安拡大', '感染症の集団発生による避難所閉鎖リスク', '医療機関の受入超過・連携遅延', '衛生資材不足による二次的健康被害']
		1-32	507.983	発災から159分	避難所での夜間体調不良者追加発生・隔離スペース・医療スタッフ体制の限界突破と緊急対応会議の開催要請	自治体職員	○○付近（住所：枚方市船橋本町一丁目874、UTM座標：〇〇〇〇〇〇）の避難所で、夜間巡回中にさらに2名（成人女性1名・小児1名）が発熱・咳・全身倦怠感を訴えた。これまで設営した隔離スペースや廊下・倉庫等の転用スペースも全て満床となり、現場の感染症対応体制・医療スタッフ・衛生資材の限界について緊急会議の開催を要請したいとの報告が災害対策本部に入った。	新たな体調不良者は成人女性と小児。家族は同避難所内に同伴。夜間のため医療機関搬送は翌朝以降を予定。近隣避難所でも同様の体調不良者追加発生が報告されている。住民からは『これ以上の感染拡大が心配』『夜間でも何らかの追加対応を』との強い要望が出ている。	標高約12.5m、極めて緩やかな傾斜（平均0.6%）の低地で、淀川氾濫流が住宅地・避難所全体に広がりやすい。長時間の排水困難・孤立化リスクが非常に高く、避難所も低地部に立地している。	避難所運営時の夜間体調急変・隔離スペース限界突破時の緊急現場会議・意思決定訓練、住民説明・感染症対策・医療スタッフ夜間運用・現場判断力強化	避難所での体調不良者が連続発生し、全ての隔離スペースが満床。現場医療体制・衛生資材・人員が限界に達した段階で、職員間の緊急対応会議を開催し、今後の感染症対策・住民説明・自治体本部への支援要請など総合的な現場判断が必要となる。	夜間の体調不良者への応急対応、既存隔離スペースの再確認、緊急現場会議の開催（医療スタッフ・自治体職員・避難所責任者）、自治体本部への追加支援要請、住民・家族への状況説明と不安対応、感染症対策の再徹底、名簿・健康観察記録の更新、翌朝以降の医療搬送計画策定、自治体・医療機関との情報共有。	隔離スペース・医療資材の物理的限界、夜間の人員・医療スタッフ不足、体調不良者の重症化リスク、住民・家族の不安拡大、現場判断の遅れや混乱、名簿・健康観察記録の遅延、感染拡大防止の徹底困難	2.5m以上3.0m未満の浸水が住宅1階全体・屋根上避難が継続（24時間未満継続予想）	避難所運営・健康被害・感染症対策・夜間対応・現場判断	避難所での長時間滞在・密集状態により、夜間に体調不良者がさらに追加発生。既存・追加の隔離スペースが全て満床となり、現場の医療体制・衛生資材・人員が限界に達したことで、職員間で緊急会議を開催し、今後の感染症対策・住民説明・自治体本部への支援要請など総合的な現場判断が必要となっている。	夜間も含めた定期的な健康観察・体調管理、感染症対策（隔離・消毒・換気・動線分離）、医療スタッフ・保健師の夜間シフト体制、衛生資材の十分な備蓄・迅速補給、住民説明・安心確保の体制強化、名簿・健康観察記録の徹底、現場緊急会議マニュアルの整備、自治体・医療機関との連携強化	平成30年7月豪雨（西日本豪雨）岡山県真備町などで、避難所内での感染症疑い・健康急変事案が多発し、夜間の医療体制や衛生資材不足、住民説明体制の課題、現場判断の遅れが指摘された。	['避難所内での健康急変・感染症拡大', '体調不良者の重症化・医療搬送遅延', '名簿管理・安否確認の遅延', '住民の不安・混乱拡大', '現場判断の遅れによる対応遅延']	['避難所内のパニック・不安拡大', '感染症の集団発生による避難所閉鎖リスク', '医療機関の受入超過・連携遅延', '衛生資材不足による二次的健康被害']
		1-33	507.983	発災から163分	避難所での夜間体調不良者追加発生・隔離スペース・医療スタッフ体制の限界突破と自治体本部への追加支援要請	自治体職員	○○付近（住所：枚方市船橋本町一丁目874、UTM座標：〇〇〇〇〇〇）の避難所で、夜間巡回中にさらに2名（高齢男性1名・小児1名）が発熱・咳・全身倦怠感を訴えた。これまで設営した隔離スペースや廊下・倉庫等の転用スペースも全て満床となり、現場の感染症対応体制・医療スタッフ・衛生資材の限界について自治体本部に追加の医療スタッフ・衛生資材・簡易隔離テントの派遣を緊急要請したいとの報告が入った。	新たな体調不良者は高齢男性と小児。家族は同避難所内に同伴。夜間のため医療機関搬送は翌朝以降を予定。近隣避難所でも同様の体調不良者追加発生が報告されている。住民からは『これ以上の感染拡大が心配』『夜間でも何らかの追加対応を』との強い要望が出ている。	標高約12.5m、極めて緩やかな傾斜（平均0.6%）の低地で、淀川氾濫流が住宅地・避難所全体に広がりやすい。長時間の排水困難・孤立化リスクが非常に高く、避難所も低地部に立地している。	避難所運営時の夜間体調急変・隔離スペース限界突破時の自治体本部への追加支援要請、現場判断力・住民説明・感染症対策・夜間医療体制の現場運用訓練	夜間に体調不良者がさらに追加発生し、全ての隔離スペースが満床。現場の医療体制・衛生資材・人員が限界に達した段階で、自治体本部への追加支援要請を迅速に行う判断力と、住民説明・感染症対策徹底が訓練ポイント。	夜間の体調不良者への応急対応、既存隔離スペースの再確認、自治体本部への医療スタッフ・衛生資材・隔離テント等の追加派遣要請、症状者の経過観察記録、住民・家族への状況説明と不安対応、名簿・健康観察記録の更新、翌朝以降の医療搬送計画策定、自治体・医療機関との情報共有。	隔離スペースや医療資材の物理的限界、夜間の人員・医療スタッフ不足、体調不良者の重症化リスク、住民・家族の不安拡大、現場判断の遅れや混乱、名簿・健康観察記録の遅延、感染拡大防止の徹底困難	2.5m以上3.0m未満の浸水が住宅1階全体・屋根上避難が継続（24時間未満継続予想）	避難所運営・健康被害・感染症対策・夜間対応・自治体本部連携	避難所での長時間滞在・密集状態により、夜間に体調不良者がさらに追加発生。既存・追加の隔離スペースが全て満床となり、現場の医療体制・衛生資材・人員が限界に達したことで、自治体本部への追加支援要請を実施。住民・家族の不安や混乱も拡大しやすい状況。	夜間も含めた定期的な健康観察・体調管理、感染症対策（隔離・消毒・換気・動線分離）、医療スタッフ・保健師の夜間シフト体制、衛生資材の十分な備蓄・迅速補給、住民説明・安心確保の体制強化、名簿・健康観察記録の徹底、自治体本部との連携と追加支援要請マニュアルの整備	平成30年7月豪雨（西日本豪雨）岡山県真備町などで、避難所内での感染症疑い・健康急変事案が多発し、夜間の医療体制や衛生資材不足、住民説明体制の課題、現場判断の遅れが指摘された。	['避難所内での健康急変・感染症拡大', '体調不良者の重症化・医療搬送遅延', '名簿管理・安否確認の遅延', '住民の不安・混乱拡大', '現場判断の遅れによる対応遅延']	['避難所内のパニック・不安拡大', '感染症の集団発生による避難所閉鎖リスク', '医療機関の受入超過・連携遅延', '衛生資材不足による二次的健康被害']
		1-34	507.983	発災から167分	避難所内での夜間体調不良者追加発生・現場体制の一時的な安定化（続報）	避難所職員	○○付近（住所：枚方市船橋本町一丁目874、UTM座標：〇〇〇〇〇〇）の避難所で、夜間巡回中に新たな体調不良者（発熱・咳・倦怠感を訴える成人女性1名）が発生。既存および追加の隔離スペースは満床だが、現時点で他の避難者の急激な体調悪化や集団発症はなく、職員・医療スタッフは経過観察と記録管理を強化しつつ、夜間体制を維持している。	新規体調不良者の家族は同避難所内に同伴。夜間のため医療機関搬送は翌朝以降を予定。自治体本部・医療機関には追加報告済み。住民からは『不安があるが今は落ち着いている』との声も出ている。	標高約12.5m、極めて緩やかな傾斜（平均0.6%）の低地で、淀川氾濫流が住宅地・避難所全体に広がりやすい。長時間の排水困難・孤立化リスクが非常に高く、避難所も低地部に立地している。	夜間の避難所運営における追加体調不良者発生時の現場体制維持・記録管理・住民説明の訓練。自治体本部・医療機関との情報共有と現場安定化の確認。	隔離スペース満床状態で追加体調不良者が発生したが、現場体制は一時的に安定。夜間の医療体制維持、記録管理、住民説明・不安対応、翌朝以降の追加対応計画が訓練ポイント。	新規体調不良者への応急対応と経過観察、追加隔離スペース設営の検討継続、健康観察記録・名簿管理の徹底、住民・家族への状況説明と安心確保、自治体本部・医療機関への逐次報告、翌朝以降の追加対応計画の準備。	隔離スペースの物理的限界、夜間の人員・医療資材不足、住民・家族の不安継続、体調不良者の重症化リスク、記録管理や名簿更新の遅延、感染拡大防止の徹底困難	2.5m以上3.0m未満の浸水が住宅1階全体・屋根上避難が継続（24時間未満継続予想）	避難所運営・健康被害・感染症対策・夜間対応	避難所での長時間滞在・密集状態により、夜間に体調不良者が連続発生。隔離スペース・医療スタッフともに限界状態だが、現場体制は一時的に安定。住民・家族の不安や混乱は継続しており、今後の追加発症や感染拡大リスクも残存。	夜間も含めた定期的な健康観察・体調管理、感染症対策（隔離・消毒・換気・動線分離）、医療スタッフの夜間シフト体制、衛生資材の十分な備蓄・迅速補給、住民説明・安心確保の体制強化、名簿・健康観察記録の徹底、翌朝以降の追加対応計画	平成30年7月豪雨（西日本豪雨）岡山県真備町などで、避難所内での感染症疑い・健康急変事案が多発し、夜間の医療体制や衛生資材不足、住民説明体制の課題が指摘された。	['避難所内での健康急変・感染症拡大', '体調不良者の重症化・医療搬送遅延', '名簿管理・安否確認の遅延', '住民の不安・混乱拡大']	['避難所内のパニック・不安拡大', '感染症の集団発生による避難所閉鎖リスク', '医療機関の受入超過・連携遅延', '衛生資材不足による二次的健康被害']
		1-35	507.983	発災から171分	避難所内での夜間体調不良者の新規発生・現場体制の一時的な安定化（続報）	避難所職員	○○付近（住所：枚方市船橋本町一丁目874、UTM座標：〇〇〇〇〇〇）の避難所で、夜間巡回中に新たな体調不良者（発熱・咳・倦怠感を訴える成人男性1名）が発生。既存の隔離スペースは満床であり、現在は経過観察を行いながら、他の避難者との動線分離を実施している。	新規体調不良者の家族は同避難所内に同伴。夜間のため医療機関搬送は翌朝以降を予定。自治体本部・医療機関には追加報告済み。住民からは『感染拡大が心配』『経過説明をもっと聞きたい』との声も増えている。	標高約12.5m、極めて緩やかな傾斜（平均0.6%）の低地で、淀川氾濫流が住宅地・避難所全体に広がりやすい。長時間の排水困難・孤立化リスクが非常に高く、避難所も低地部に立地している。	夜間の避難所運営における体調不良者発生時の現場体制維持、住民説明・安心確保、感染症対策・記録管理の強化訓練。	隔離スペース満床状態が継続し、追加体調不良者が発生。住民説明・不安対応、現場体制維持、感染症対策・記録管理の徹底、翌朝以降の医療搬送計画が訓練ポイント。	新規体調不良者への応急対応と経過観察、動線分離の徹底、健康観察記録・名簿管理の強化、住民・家族への状況説明と安心確保、自治体本部・医療機関への逐次報告、翌朝以降の追加対応計画の準備。	隔離スペースの物理的限界、夜間の人員・医療資材不足、住民・家族の不安増大、体調不良者の重症化リスク、記録管理や名簿更新の遅延、感染拡大防止の徹底困難	2.5m以上3.0m未満の浸水が住宅1階全体・屋根上避難が継続（24時間未満継続予想）	避難所運営・健康被害・感染症対策・夜間対応	避難所での長時間滞在・密集状態により、夜間に体調不良者が連続発生。隔離スペース・医療スタッフともに限界状態だが、現場体制は一時的に安定。住民・家族の不安や混乱は継続しており、今後の追加発症や感染拡大リスクも残存。	夜間も含めた定期的な健康観察・体調管理、感染症対策（隔離・消毒・換気・動線分離）、医療スタッフの夜間シフト体制、衛生資材の十分な備蓄・迅速補給、住民説明・安心確保の体制強化、名簿・健康観察記録の徹底、翌朝以降の追加対応計画	平成30年7月豪雨（西日本豪雨）岡山県真備町などで、避難所内での感染症疑い・健康急変事案が多発し、夜間の医療体制や衛生資材不足、住民説明体制の課題が指摘された。	['避難所内での健康急変・感染症拡大', '体調不良者の重症化・医療搬送遅延', '名簿管理・安否確認の遅延', '住民の不安・混乱拡大']	['避難所内のパニック・不安拡大', '感染症の集団発生による避難所閉鎖リスク', '医療機関の受入超過・連携遅延', '衛生資材不足による二次的健康被害']
		1-36	507.983	発災から178分	避難所内での夜間体調不良者の追加発生・現場体制の一時的な安定化（続報）	避難所職員	○○付近（住所：枚方市船橋本町一丁目874、UTM座標：〇〇〇〇〇〇）の避難所で、夜間巡回中に新たな体調不良者（発熱・咳・倦怠感を訴える高齢女性1名）が発生。既存の隔離スペースは満床であり、応急対応後は経過観察と家族・他避難者との動線分離で対応している。	新規体調不良者の家族は同避難所内に同伴。夜間のため医療機関搬送は翌朝以降を予定。自治体本部・医療機関には追加報告済み。住民からは『感染拡大が心配』『経過説明をもっと聞きたい』との声が引き続き寄せられている。	標高約12.5m、極めて緩やかな傾斜（平均0.6%）の低地で、淀川氾濫流が住宅地・避難所全体に広がりやすい。長時間の排水困難・孤立化リスクが非常に高く、避難所も低地部に立地している。	夜間の避難所運営における体調不良者追加発生時の現場体制維持、住民説明・安心確保、感染症対策・記録管理の強化訓練。	隔離スペース満床状態が継続し、夜間に追加体調不良者が発生。住民説明・不安対応、現場体制維持、感染症対策・記録管理の徹底、翌朝以降の医療搬送計画が訓練ポイント。	新規体調不良者への応急対応と経過観察、動線分離の徹底、健康観察記録・名簿管理の強化、住民・家族への状況説明と安心確保、自治体本部・医療機関への逐次報告、翌朝以降の医療搬送・体制強化計画の準備。	隔離スペースの物理的限界、夜間の人員・医療資材不足、住民・家族の不安増大、体調不良者の重症化リスク、記録管理や名簿更新の遅延、感染拡大防止の徹底困難	2.5m以上3.0m未満の浸水が住宅1階全体・屋根上避難が継続（24時間未満継続予想）	避難所運営・健康被害・感染症対策・夜間対応	避難所での長時間滞在・密集状態により、夜間に体調不良者が連続発生。隔離スペース・医療スタッフともに限界状態だが、現場体制は一時的に安定。住民・家族の不安や混乱は継続しており、今後の追加発症や感染拡大リスクも残存。	夜間も含めた定期的な健康観察・体調管理、感染症対策（隔離・消毒・換気・動線分離）、医療スタッフの夜間シフト体制、衛生資材の十分な備蓄・迅速補給、住民説明・安心確保の体制強化、名簿・健康観察記録の徹底、翌朝以降の追加対応計画	平成30年7月豪雨（西日本豪雨）岡山県真備町などで、避難所内での感染症疑い・健康急変事案が多発し、夜間の医療体制や衛生資材不足、住民説明体制の課題が指摘された。	['避難所内での健康急変・感染症拡大', '体調不良者の重症化・医療搬送遅延', '名簿管理・安否確認の遅延', '住民の不安・混乱拡大']	['避難所内のパニック・不安拡大', '感染症の集団発生による避難所閉鎖リスク', '医療機関の受入超過・連携遅延', '衛生資材不足による二次的健康被害']
		1-37	507.983	発災から181分	避難所内での夜間体調不良者の新規発生・現場体制の経過観察と住民説明強化（続報）	避難所職員	○○付近（住所：枚方市船橋本町一丁目874、UTM座標：〇〇〇〇〇〇）の避難所で、夜間巡回中に新たな体調不良者（発熱・咳・全身倦怠感を訴える成人男性1名）が発生。隔離スペースは満床のため、応急対応後は家族とともに動線分離し、経過観察を継続している。	新規体調不良者の家族は同避難所内に同伴。夜間のため医療機関搬送は翌朝以降を予定。自治体本部・医療機関への追加報告済み。住民からは『感染拡大が心配』『経過説明をもっと聞きたい』との声が引き続き寄せられている。	標高約12.5m、極めて緩やかな傾斜（平均0.6%）の低地で、淀川氾濫流が住宅地・避難所全体に広がりやすい。長時間の排水困難・孤立化リスクが非常に高く、避難所も低地部に立地している。	夜間の避難所運営で体調不良者が継続発生する状況下における現場体制の維持、住民説明・安心確保、感染症対策・経過観察・記録管理の強化訓練。	隔離スペース満床が継続し、追加体調不良者が発生。住民説明・不安対応、現場体制維持、感染症対策・記録管理の徹底、翌朝以降の医療搬送計画が訓練ポイント。	新規体調不良者への応急対応と経過観察、動線分離の徹底、健康観察記録・名簿管理の強化、住民・家族への状況説明と安心確保、自治体本部・医療機関への逐次報告、翌朝以降の医療搬送・体制強化計画の準備。	隔離スペースの物理的限界、夜間の人員・医療資材不足、住民・家族の不安増大、体調不良者の重症化リスク、記録管理や名簿更新の遅延、感染拡大防止の徹底困難	2.5m以上3.0m未満の浸水が住宅1階全体・屋根上避難が継続（24時間未満継続予想）	避難所運営・健康被害・感染症対策・夜間対応	避難所での長時間滞在・密集状態により、夜間に体調不良者が連続発生。隔離スペース・医療スタッフともに限界状態だが、現場体制は一時的に安定。住民・家族の不安や混乱は継続しており、今後の追加発症や感染拡大リスクも残存。	夜間も含めた定期的な健康観察・体調管理、感染症対策（隔離・消毒・換気・動線分離）、医療スタッフの夜間シフト体制、衛生資材の十分な備蓄・迅速補給、住民説明・安心確保の体制強化、名簿・健康観察記録の徹底、翌朝以降の追加対応計画	平成30年7月豪雨（西日本豪雨）岡山県真備町などで、避難所内での感染症疑い・健康急変事案が多発し、夜間の医療体制や衛生資材不足、住民説明体制の課題が指摘された。	['避難所内での健康急変・感染症拡大', '体調不良者の重症化・医療搬送遅延', '名簿管理・安否確認の遅延', '住民の不安・混乱拡大']	['避難所内のパニック・不安拡大', '感染症の集団発生による避難所閉鎖リスク', '医療機関の受入超過・連携遅延', '衛生資材不足による二次的健康被害']

## Sheet: 枚方市北船橋町25
評価	備考	シナリオID	災害の中心からの距離[m]	イベント発生時刻	付与内容	情報源	状況付与内容	補足情報	地形情報や想定想定される被害の特徴	訓練効果・狙い	判断ポイント	期待される対応行動	想定される課題	水位状況	被害の種類	詳細な被害状況	想定される対策	類似の過去事例(あれば記載)	直近のリスク	二次的なリスク
		1-1	544.938	発災から5分	住宅周辺の歩道冠水	住民	○○付近（住所：枚方市北船橋町25、UTM座標：〇〇〇〇〇〇）の歩道に水が溜まり始めており、子どもが通学路で足元が見えず危険との通報。歩道の一部では水があふれてきている。	警察には連絡済み。道路名を聞かれた場合：「路線番号はわかりませんが、○○公園の前の通学路です。」	標高11.3m前後、傾斜0.6%と非常に緩やかな低地。淀川からの氾濫時には排水が間に合わず、歩道や側溝から冠水が始まりやすい。住宅地・通学路が多い。	住民への周知、安全確保、歩行者・通学児童の危険回避、現地状況の迅速な把握	住宅地内の歩道は標高11m前後で、緩やかな傾斜のため排水が追いつかず冠水しやすい。周辺の車道より一段低い歩道での冠水発生に着目。	現地の冠水状況の確認、歩行者・通学児童の安全誘導・通行規制、通学路の一時封鎖や迂回案内、住民・学校への情報発信、道路管理者・警察との連携。	通学・通勤時間帯での混乱、歩行者・児童の転倒・感電リスク、情報伝達の遅れ、冠水拡大時の迅速な対応	0.5m以上1.0m未満の冠水が歩道に発生	生活インフラ被害（歩道・通学路冠水）	歩道や通学路が冠水し、歩行者や児童の通行が危険となる。今後、車道や住宅敷地への浸水拡大の恐れもある。	歩道・側溝の排水確認、通行規制やバリケード設置、住民・学校への迅速な情報発信、必要に応じて避難指示や通学路変更、道路管理者・警察との連携。	平成30年7月豪雨時、淀川流域の住宅街で歩道・通学路の冠水や通行障害が発生。	['歩行者・児童の転倒・感電事故', '通学・通勤時の混乱や遅延']	['車道や住宅への冠水拡大', '救急・消防車両の通行障害', '地域の一時的孤立化']
		1-2	544.938	発災から7分	住宅地内車道の冠水拡大と通行規制の開始	警察(110番)	○○付近（住所：枚方市北船橋町25、UTM座標：〇〇〇〇〇〇）の車道が冠水し始め、車両の通行が難しくなってきている。現場の警察官から『路面の大部分が水で覆われ、車両が徐行せざるを得ない。今後、通行止めが必要となるため道路管理者への早期引継ぎを希望』との連絡。	歩道の冠水については既に住民から通報あり。道路名を聞かれた場合：「路線番号はわかりませんが、北船橋町公園前の幹線道路です。」	標高11.3m前後、平均傾斜0.6%の極めて緩やかな低地。淀川氾濫時は住宅地歩道から車道へと冠水が波及しやすい。排水能力を超えると車道全体が冠水し、通行困難となる。	住民・ドライバーへの周知、現地交通規制の迅速な実施、道路管理者・警察間の連携訓練	歩道冠水から車道冠水への拡大段階。低地部特有の排水困難な道路で、車両通行規制の初動判断・連携が訓練ポイント。	現地の冠水状況詳細確認、通行規制の即時実施・バリケード設置、住民・ドライバーへの情報発信、道路管理者・警察・消防との連携強化、迂回路案内の検討	通勤・通学時間帯での交通混乱、冠水拡大ペースの把握と規制タイミングの判断、歩行者・自転車の安全確保、情報伝達の遅れによる二次被害	1.0m以上1.5m未満の冠水が車道に拡大	交通インフラ被害（車道冠水・通行規制）	車道の広範囲が冠水し、通行中の車両が徐行・立ち往生。今後は通行止めが必要となり、交通混乱や救急・消防車両の進入困難リスクも高まる。	現地冠水状況の常時監視、迅速な通行規制・バリケード設置、住民・ドライバーへの情報発信、道路管理者・警察・消防との連携強化、必要に応じて避難指示や迂回路案内。	平成30年7月豪雨時、淀川流域の主要道路で冠水による通行止め・車両立ち往生事例多数。	['車両の立ち往生・水没事故', '通行規制遅延による二次被害']	['救急・消防車両の進入困難', '冠水区域内の孤立化']
		1-3	544.938	発災から11分	住宅敷地・玄関先への浸水拡大と避難判断相談	住民	○○付近（住所：枚方市北船橋町25、UTM座標：〇〇〇〇〇〇）の自宅敷地や玄関先まで水が入り始めた。『家の前の道路や歩道はすでに冠水、玄関先から水が流れ込み始めている。家族で避難すべきかどうか相談したい』との通報。	警察には連絡済み。消防にはまだ連絡していない。道路名を聞かれた場合：「路線番号はわかりませんが、北船橋町公園の近くの住宅地です。」	標高11.3m前後、平均傾斜0.6%の極めて緩やかな低地。淀川氾濫時は住宅地歩道・車道から敷地・玄関先へと冠水が波及しやすい。排水能力を超えると床下・床上浸水リスクも高まる。	住民の避難判断・初動避難行動の訓練、浸水拡大時の住民支援・情報発信、行政・消防・警察の連携強化	歩道・車道冠水から敷地・玄関先への浸水段階へ進行。住民が早期に避難判断を下せるか、避難支援・情報提供体制が機能するかが訓練のポイント。	現地の浸水状況の即時確認、住民への避難勧告または指示の発令、要配慮者リストの確認と個別支援、消防・警察・自治体の連携による避難誘導、避難所の案内と開設準備、危険区域のバリケード設置や立入制限、現場情報の継続収集	住民の避難判断の遅れ、高齢者・要配慮者の避難支援の手薄化、床下・床上浸水への急速な進行、現場巡回や安否確認の遅延	1.5m以上2.0m未満の冠水が敷地・玄関先まで拡大	生活インフラ・住宅被害（敷地・玄関先浸水）	住宅敷地や玄関先まで水が流入し、今後床下・床上浸水に進行するリスクが高まっている。住民の避難判断が遅れると人的被害や孤立リスクも増大。家財や車両への被害、電気設備の浸水リスクも顕在化。	住民への早期避難勧告・指示、避難所の迅速な開設・案内、要支援者リストの活用による個別支援、現場巡回とバリケード設置、排水路の詰まり除去、消防・警察・自治体の連携強化	平成30年7月豪雨（西日本豪雨）で淀川流域の住宅地にて同様の敷地・玄関先への浸水拡大事例多数。	['住宅への床下・床上浸水進行', '住民の避難遅延による人的被害', '電気設備・車両の浸水による感電・損傷']	['地域の一時的孤立化', '高齢者・要支援者の避難困難', '浸水拡大による救急・消防車両の進入困難']
		1-4	544.938	発災から16分	住宅1階床下への浸水と住民の避難行動開始	消防	○○付近（住所：枚方市北船橋町25、UTM座標：〇〇〇〇〇〇）の住宅地で、1階床下まで水が到達し始めたとの現場報告。『周囲の道路や歩道はすでに冠水し、住民が自主的に2階や高所へ避難を開始している』。消防隊員が現地確認のうえ、要配慮者の安否確認と避難支援を実施中。	現場の住民からも複数の避難相談通報あり。警察・自治体とも情報共有済み。道路名を聞かれた場合：「路線番号はわかりませんが、北船橋町公園近くの住宅地です。」	標高11.3m前後、平均傾斜0.6%の極めて緩やかな低地。淀川堤防に近く、氾濫水が流入しやすい。住宅地全体で排水能力を超えた浸水が波及しやすい地形。	床下浸水・孤立発生時の初動対応訓練、住民への垂直避難・安否確認、消防・警察・自治体の連携強化	歩道・車道・敷地への浸水から住宅1階床下への進行段階。住民の孤立リスクが顕在化し、現場での垂直避難支援や安否確認、救助要請判断が訓練ポイント。	現地の床下浸水・孤立状況の即時確認、住民への垂直避難勧告、安否確認の徹底、要配慮者リストの確認と個別支援、消防・警察・自治体の連携による救助計画立案、危険区域の立入制限、避難所の案内と受入準備、現場情報の継続収集	孤立住民の把握遅れ、夜間や悪天候時の救助困難、要配慮者の救助優先順位付け、現場への救助隊到着遅延、通信手段の途絶や情報伝達の遅れ	2.0m以上2.5m未満の浸水が住宅1階床下に到達	住宅被害（床下浸水）・住民の初期的孤立	住宅1階床下まで浸水し、今後床上浸水や完全孤立に進行するリスクが高い。周囲の道路も水没し始め、外部への避難が困難となりつつある。高齢者や要配慮者の安否確認・救助の優先順位付けが必要。	住民への垂直避難勧告・指示、避難所の早期開設と案内、要支援者リストの活用による個別支援、現場巡回と安否確認、消防・警察・自治体の連携による救助体制の強化、電気・ガスの遮断、危険区域の立入制限	平成30年7月豪雨（西日本豪雨）で淀川流域の住宅地にて同様の床下浸水・孤立事例多数。岡山県真備町などで救助活動が難航した記録あり。	['住宅の床上浸水進行', '住民の孤立・避難遅延による人的被害', '電気設備・車両の浸水による感電・損傷']	['地域の一時的孤立化', '高齢者・要支援者の避難困難', '浸水拡大による救急・消防車両の進入困難']
		1-5	544.938	発災から21分	住宅1階床上への浸水発生と複数住民からの救助要請	住民	○○付近（住所：枚方市北船橋町25、UTM座標：〇〇〇〇〇〇）の自宅で、1階の床上まで水が上がり始め、家族全員が2階に避難した。高齢の家族もおり、外部への避難ができないため救助を要請したい。	消防・警察にはすでに連絡済み。道路名を聞かれた場合：「路線番号はわかりませんが、北船橋町公園近くの住宅地です。」	標高11.3m前後、平均傾斜0.6%の極めて緩やかな低地。淀川堤防に近く、氾濫水が住宅地全体に波及しやすい。排水能力を超えた浸水が進行しやすい地形。	床上浸水・住民孤立時の救助要請対応、垂直避難・救助判断訓練、現場情報の即時把握と優先順位付け	床下浸水から床上浸水へ進行し、住民が自力避難困難な孤立状態。現場からの救助要請対応や救助手段（ボート・ヘリ等）の選定、要配慮者支援の優先順位判断が訓練ポイント。	現地の床上浸水・孤立状況の即時確認、住民への安否確認と救助計画の立案、消防・警察・自治体による救助隊派遣、ボートやヘリ等の救助手段の検討、避難所の案内と受入準備、要支援者リストによる優先支援、危険区域の立入制限と周辺住民への情報発信。	救助隊の現場到着遅延、浸水範囲拡大による救助困難化、夜間・悪天候時の救助活動の危険、孤立住民の健康悪化やパニック、救助要請の優先順位付けの難しさ、通信手段の途絶	2.5m以上3.0m未満の浸水が住宅1階床上に到達	住宅被害（床上浸水）・住民孤立	住宅1階まで水が上がり、住民は2階や屋根などに垂直避難。周囲の道路や敷地は完全に水没し、外部への避難・救助が困難。高齢者や要配慮者がいる場合は生命の危険も高まる。	早期の避難指示・勧告、要支援者リストによる個別支援、現場巡回と安否確認、ボート・ヘリ等の救助手段の事前準備、電気・ガスの遮断、危険区域の立入制限、避難所の早期開設と受入体制強化	平成30年7月豪雨（西日本豪雨）で淀川流域の低地住宅地にて同様の床上浸水・孤立事例多数。岡山県真備町や広島県三原市などで救助活動が難航した記録あり。	['住宅の床上浸水による住民の孤立・生命危険', '高齢者・要配慮者の健康悪化', '電気設備の浸水による感電・火災']	['地域の長期的孤立化', '感染症・衛生環境の悪化', '救助活動中の二次災害（流れの強い水中での事故）']
		1-6	544.938	発災から29分	2階・屋根上避難住民からの直接通報と救助要請	住民	○○付近（住所：枚方市北船橋町25、UTM座標：〇〇〇〇〇〇）の自宅で、1階が完全に水没し、家族4人が2階および屋根の上で救助を待っている。高齢者1名が体調不良を訴えている。周囲は水流が速く、地上からの避難は不可能。	消防・警察には既に通報済み。道路名を聞かれた場合：「路線番号はわかりませんが、北船橋町公園近くの住宅地です。」	標高11.3m前後、平均傾斜0.6%の極めて緩やかな低地。淀川堤防に近く、氾濫水が住宅地全体に波及しやすい。排水能力を超えた浸水が進行しやすい地形。	屋根上・2階避難住民からの救助要請への即応、優先度判断、現場状況の即時把握と救助手段（ボート・ヘリ等）の選定訓練	床上浸水・屋根上避難が発生し、住民からの直接救助要請がある段階。救助要請の優先順位や救助手段の判断、多様な関係機関との連携が訓練ポイント。体調不良者がいる場合の優先順位付け。	現地の屋根上・2階避難・孤立状況の即時把握、住民への安否確認と救助計画の立案、ボートやヘリ等の救助手段の準備・出動判断、体調不良者への優先救助、要配慮者リストによる優先支援、避難所の受入体制強化、危険区域の立入制限、関係機関との連携強化。	救助隊の現場到着遅延、屋根上避難者の健康悪化やパニック、浸水範囲拡大による救助活動困難化、夜間・悪天候時の救助活動の危険、通信手段の途絶、救助要請の優先順位付けの難しさ、体調不良者の緊急対応	3.0m前後の浸水が住宅1階全体に達し、2階・屋根上避難が必要な状況	住宅被害（床上浸水・屋根上避難）・住民孤立・救助要請	住宅1階が完全に浸水し、住民は2階や屋根上に避難。周囲の道路や敷地は完全に水没し、地上からの避難・救助が困難。高齢者を含む住民から直接救助要請が発生し、体調不良者もおり、迅速な対応が求められる。	早期の避難指示・勧告、要支援者リストによる個別支援、現場巡回と安否確認、ボート・ヘリ等の救助手段の事前準備と迅速な出動、体調不良者の優先救助、電気・ガスの遮断、危険区域の立入制限、避難所の受入体制強化、関係機関との情報共有	平成30年7月豪雨（西日本豪雨）で淀川流域の低地住宅地にて同様の床上浸水・屋根上避難・孤立事例多数。岡山県真備町や広島県三原市などで救助活動が難航した記録あり。	['住宅の床上浸水による住民の孤立・生命危険', '屋根上避難者の健康悪化・転落リスク', '体調不良者の容体急変', '電気設備の浸水による感電・火災']	['地域の長期的孤立化', '感染症・衛生環境の悪化', '救助活動中の二次災害（流れの強い水中での事故）']
		1-7	544.938	発災から33分	屋根上・2階避難住民の救助要請続報（体調急変者の容体悪化）	消防	○○付近（住所：枚方市北船橋町25、UTM座標：〇〇〇〇〇〇）の住宅地で、屋根上および2階に避難している住民のうち、体調不良を訴えていた高齢者1名が意識を失ったとの現場消防隊からの報告。現地は水流が非常に強く、地上からの救助は依然として困難。ボートによる救助準備を進めているが、ヘリによる救助要請も検討が必要と判断。	現地周辺から複数の救助要請が継続して入っており、警察・自治体とも情報共有済み。道路名を聞かれた場合：「路線番号はわかりませんが、北船橋町公園近くの住宅地です。」	標高11.3m前後、平均傾斜0.6%の極めて緩やかな低地。淀川氾濫水が住宅地全体に波及しやすく、排水能力を超えた浸水が長時間持続。高台や迂回路がなく孤立リスクが高い。	体調急変者への最優先救助判断、複数要救助者への救助手段（ボート・ヘリ等）の迅速な選定、関係機関連携の即時強化、優先順位付け訓練	屋根上・2階避難住民の中から容体急変者が発生し、迅速な救助が必要となる段階。救助優先順位の再検討や、救助手段の多様化（ヘリ要請含む）が訓練のポイント。現場消防・警察・自治体・自衛隊等との連携・情報共有の即時性が問われる。	現場からの詳細な健康状態・人数把握、要配慮者（高齢者・体調不良者）の優先救助計画立案、ボート・ヘリ等の救助手段の迅速な準備・出動判断、住民・関係機関への情報発信、避難所の受入体制強化、危険区域の立入制限、関係機関（警察・消防・自衛隊・自治体）との連携強化	救助隊の現場到着遅延、要救助者の健康状態急変・生命危険、屋根上避難者のパニックや転落リスク、救助要請の優先順位付けの難しさ、通信手段の途絶、救助活動中の二次災害（強い流れによる事故や救助者の安全確保）	3.0m前後の浸水が住宅1階全体に達し、2階・屋根上避難が必要な状況が継続	住宅被害（床上浸水・屋根上避難）・住民孤立・要配慮者健康悪化	住宅1階が完全に浸水し、住民は2階や屋根上に避難。体調急変者が発生し、迅速な救助が必要。周囲の道路や敷地は完全に水没し、地上からの救助は極めて困難。複数世帯で救助要請が続発。	早期の避難指示・勧告、要支援者リストによる個別支援、現場巡回と安否確認、ボート・ヘリ等の救助手段の迅速な出動、要配慮者の優先救助、電気・ガスの遮断、危険区域の立入制限、避難所の受入体制強化、関係機関との情報共有	平成30年7月豪雨（西日本豪雨）で淀川流域の低地住宅地にて同様の床上浸水・屋根上避難・孤立事例多数。岡山県真備町や広島県三原市などで救助活動が難航した記録あり。	['住宅の床上浸水による住民の孤立・生命危険', '体調急変者の生命リスク', '屋根上避難者の健康悪化・転落リスク', '電気設備の浸水による感電・火災']	['地域の長期的孤立化', '感染症・衛生環境の悪化', '救助活動中の二次災害（流れの強い水中での事故）']
		1-8	544.938	発災から38分	屋根上・2階避難住民の救助活動本格化と現場安全確保要請	消防	○○付近（住所：枚方市北船橋町25、UTM座標：〇〇〇〇〇〇）の住宅地で、屋根上や2階に避難している住民の救助活動を現地消防隊が開始。水流が強く、救助ボートの進入時に流木や瓦礫が多く確認されている。複数の住民が手を振って救助を求めているが、一部住民は移動困難な状況。	現場隊員からの追加要請で、警察による周辺道路の立入規制と、追加の救助ボート・人員の派遣が必要。道路名を聞かれた場合：「路線番号は不明ですが、北船橋町公園近くの住宅地です」。	標高11.3m前後、平均傾斜0.6%の極めて緩やかな低地。淀川氾濫流が住宅地全体に広がりやすく、排水困難。高台や迂回路がなく、孤立化リスクが高い。	現場安全管理と救助活動の両立、複数要救助者への優先順位判断、関係機関連携訓練、現場状況変化への即応力強化	屋根上・2階避難住民救助の本格化段階。流木・瓦礫等による救助活動の危険性増大、現場安全確保のための警察・消防・自治体の連携、追加資機材・人員要請判断が訓練ポイント。	現場の安全確保（流木・瓦礫除去、立入規制）、救助活動の継続・優先順位付け、追加ボート・人員の派遣、住民への状況説明と安心確保、要配慮者の優先救助、関係機関（警察・消防・自衛隊・自治体）との連携強化。	救助活動中の二次災害（流木衝突・転落事故）、救助隊員の安全確保、現場への追加資機材・人員到着の遅延、住民の不安増大、救助要請の優先順位付けの難しさ、通信手段の途絶	3.0m前後の浸水が住宅1階全体、2階・屋根上避難が継続	住宅被害（床上浸水・屋根上避難）・住民孤立・救助活動中の現場安全リスク	住宅1階全体が浸水し、住民は2階や屋根上に避難。複数世帯で救助要請が続発。現場は流木や瓦礫の漂流が多く、救助ボートの進入時に衝突・転覆等の危険が高まっている。住民の中には体調不良や移動困難者も含まれ、救助活動の優先順位付けと現場安全管理が重要。	早期避難指示・勧告、要支援者リストによる個別支援、現場安全確保（立入規制・流木除去）、追加資機材・人員の迅速派遣、ボート・ヘリ等の救助手段の多様化、危険区域の立入制限、避難所の受入体制強化、関係機関との情報共有・連携	平成30年7月豪雨（西日本豪雨）で淀川流域の低地住宅地にて同様の床上浸水・屋根上避難・孤立事例多数。岡山県真備町等で救助活動中の流木衝突事故や現場隊員の安全確保が課題となった。	['住宅の床上浸水による住民の孤立・生命危険', '流木・瓦礫による救助活動中の隊員・住民の負傷', '屋根上避難者の健康悪化・転落リスク', '電気設備の浸水による感電・火災']	['地域の長期的孤立化', '感染症・衛生環境の悪化', '救助活動中の二次災害（流れの強い水中での事故・資機材損壊）']
		1-9	544.938	発災から43分	救助活動中の現場指揮再調整・追加救助隊要請	消防	○○付近（住所：枚方市北船橋町25、UTM座標：〇〇〇〇〇〇）の住宅地で、屋根上や2階に避難している住民への救助活動を続行中。現場では流木や瓦礫の増加により、進入していた救助ボートの一部が一時的に活動を中断せざるを得ない状況となった。現場指揮隊より『安全確保のため一部隊を一時退避させ、追加の救助ボート・資機材・人員の派遣を要請したい』との連絡。	現場では複数の住民が依然として屋根上・2階で救助を待っている。周辺道路は全域冠水し、陸路での接近は困難。道路名を聞かれた場合：「路線番号は不明ですが、北船橋町公園近くの住宅地です」。	標高11.3m前後、平均傾斜0.6%の極めて緩やかな低地。淀川氾濫流が住宅地全体に広がりやすく、排水困難。高台や迂回路がなく、孤立化リスクが高い。	救助活動中の現場指揮再調整、追加資機材・人員要請判断、現場の安全確保と継続的救助活動の両立訓練	流木・瓦礫の増加により救助活動の危険性がさらに高まった状況で、現場指揮系統の再調整や追加救助隊派遣の判断が訓練ポイント。現場安全確保と住民救助のバランスが問われる。	現場の安全状況再評価、救助活動の一時中断・再開判断、追加救助隊・資機材の派遣要請、現場指揮系統の明確化、住民・関係機関への情報共有、救助要請住民の優先順位付け、警察・自衛隊等との連携強化	救助活動中の二次災害（流木衝突・転覆事故）リスク増大、現場隊員・住民の安全確保、追加資機材・人員到着の遅延、現場混乱・指揮系統の乱れ、住民の不安増大、通信手段の一時途絶	3.0m前後の浸水が住宅1階全体、2階・屋根上避難が継続	住宅被害（床上浸水・屋根上避難）・住民孤立・救助活動中の現場安全リスク・救助活動遅延	住宅1階全体が浸水し、住民は2階や屋根上に避難。救助活動中に流木・瓦礫の増加で救助隊の安全確保が困難となり、一部活動を中断。追加の救助隊・資機材が必要な状況。住民の中には体調不良や移動困難者も含まれる。	現場安全確保（立入規制・流木除去）、追加資機材・人員の迅速派遣、現場指揮系統の明確化、ボート・ヘリ等の救助手段の多様化、住民への状況説明と安心確保、危険区域の立入制限、関係機関との情報共有・連携	平成30年7月豪雨（西日本豪雨）で淀川流域の低地住宅地にて同様の床上浸水・屋根上避難・孤立事例多数。岡山県真備町等で救助活動中の流木衝突事故や現場隊員の安全確保が課題となった。	['住宅の床上浸水による住民の孤立・生命危険', '流木・瓦礫による救助活動中の隊員・住民の負傷', '屋根上避難者の健康悪化・転落リスク', '救助活動の一時中断・遅延']	['地域の長期的孤立化', '感染症・衛生環境の悪化', '救助活動中の二次災害（流れの強い水中での事故・資機材損壊）']
		1-10	544.938	発災から49分	救助活動の一時中断と現場安全再評価	消防	○○付近（住所：枚方市北船橋町25、UTM座標：〇〇〇〇〇〇）の住宅地で、屋根上や2階に避難している住民への救助活動中、現場指揮隊より『流木や瓦礫の増加、水流の激化により救助ボートの追加出動が危険と判断し、一時的に活動を中断。現場の安全状況を再評価し、必要に応じて追加の救助隊・資機材の派遣を要請したい』との連絡。	現場では複数の住民が依然として屋根上・2階で救助を待っている。警察・自治体には既に情報共有済み。道路名を聞かれた場合：「路線番号は不明ですが、北船橋町公園近くの住宅地です」。	標高11.3m前後、平均傾斜0.6%の極めて緩やかな低地。淀川氾濫流が住宅地全体に広がりやすく、排水困難。高台や迂回路がなく、孤立化リスクが高い。	救助活動中の現場安全再評価、追加資機材・人員要請判断、現場の安全確保と継続的救助活動の両立訓練	救助活動中の二次災害リスクを受け、現場指揮隊が安全を最優先して一時活動を中断。現場安全確保と住民救助のバランス、追加救助隊派遣の判断が訓練ポイント。	現場の安全状況再評価、救助活動の一時中断・再開判断、追加救助隊・資機材の派遣要請、現場指揮系統の明確化、住民・関係機関への情報共有、救助要請住民の優先順位付け、警察・自衛隊等との連携強化。	救助活動中の二次災害リスク増大、現場隊員・住民の安全確保、追加資機材・人員到着の遅延、現場混乱・指揮系統の乱れ、住民の不安増大、通信手段の一時途絶	3.0m前後の浸水が住宅1階全体、2階・屋根上避難が継続（24時間未満継続予想）	住宅被害（床上浸水・屋根上避難）・住民孤立・救助活動遅延	住宅1階全体が浸水し、住民は2階や屋根上に避難。救助活動中に流木・瓦礫の増加で救助隊の安全確保が困難となり、一部活動を中断。追加の救助隊・資機材が必要な状況。住民の中には体調不良や移動困難者も含まれる。	現場安全確保（立入規制・流木除去）、追加資機材・人員の迅速派遣、現場指揮系統の明確化、ボート・ヘリ等の救助手段の多様化、住民への状況説明と安心確保、危険区域の立入制限、関係機関との情報共有・連携	平成30年7月豪雨（西日本豪雨）で淀川流域の低地住宅地にて同様の床上浸水・屋根上避難・孤立事例多数。岡山県真備町等で救助活動中の流木衝突事故や現場隊員の安全確保が課題となった。	['住宅の床上浸水による住民の孤立・生命危険', '流木・瓦礫による救助活動中の隊員・住民の負傷', '屋根上避難者の健康悪化・転落リスク', '救助活動の一時中断・遅延']	['地域の長期的孤立化', '感染症・衛生環境の悪化', '救助活動中の二次災害（流れの強い水中での事故・資機材損壊）']
		1-11	544.938	発災から54分	追加救助隊・資機材要請および現場指揮本部の設置準備	消防	○○付近（住所：枚方市北船橋町25、UTM座標：〇〇〇〇〇〇）の住宅地で、現場指揮隊より『救助活動の再開にあたり、追加の救助ボート・救命胴衣・救助用ロープなど資機材の派遣と、現場に臨時指揮本部を設置したい』との要請。現場は依然として流木・瓦礫の漂流が多く、屋根上や2階で救助を待つ住民が複数名確認されている。	現場は流木・瓦礫の漂流が多く、追加の救助隊・資機材が到着するまで救助活動は一部制限。警察・自治体・自衛隊との連携も必要。道路名を聞かれた場合：「路線番号は不明ですが、北船橋町公園近くの住宅地です」。	標高11.3m前後、平均傾斜0.6%の極めて緩やかな低地。淀川氾濫流が住宅地全体に広がりやすく、排水困難。高台や迂回路がなく、孤立化リスクが高い。	現場指揮本部の設置による指揮・調整体制強化、追加資機材・人員要請判断、現場安全確保と住民救助の両立訓練	現場安全再評価後、追加資機材・人員要請と現場指揮本部設置による指揮命令系統の強化。関係機関連携・現場状況変化への即応力強化が訓練ポイント。	現場指揮本部の設置と指揮系統の明確化、追加救助隊・資機材の迅速な派遣要請、現場安全状況の継続的評価、住民・関係機関への情報共有、救助要請住民の優先順位付け、警察・自衛隊等との連携強化。	追加資機材・人員到着までの救助活動制限、現場指揮系統の混乱防止、関係機関連携の遅れ、住民・隊員の安全確保、通信手段の維持	3.0m前後の浸水が住宅1階全体、2階・屋根上避難が継続（24時間未満継続予想）	住宅被害（床上浸水・屋根上避難）・住民孤立・救助活動再開準備	住宅1階全体が浸水し、住民は2階や屋根上に避難。救助活動は現場安全確保のため一時中断中だが、追加救助隊・資機材の到着と現場指揮本部設置により、救助活動再開の準備が進められている。住民の中には体調不良や移動困難者も含まれる。	現場安全確保（立入規制・流木除去）、追加資機材・人員の迅速派遣、現場指揮本部設置による指揮系統強化、救助手段の多様化、住民への状況説明と安心確保、危険区域の立入制限、関係機関との情報共有・連携	平成30年7月豪雨（西日本豪雨）で淀川流域の低地住宅地にて同様の床上浸水・屋根上避難・孤立事例多数。岡山県真備町等で救助活動中の流木衝突事故や現場隊員の安全確保が課題となった。	['住宅の床上浸水による住民の孤立・生命危険', '流木・瓦礫による救助活動中の隊員・住民の負傷', '屋根上避難者の健康悪化・転落リスク', '救助活動の一時中断・遅延']	['地域の長期的孤立化', '感染症・衛生環境の悪化', '救助活動中の二次災害（流れの強い水中での事故・資機材損壊）']
		1-12	544.938	発災から59分	救助活動再開と住民への状況説明・安心確保	消防	○○付近（住所：枚方市北船橋町25、UTM座標：〇〇〇〇〇〇）の住宅地で、追加の救助ボート・救命資機材が到着し、現場指揮本部の指示のもと救助活動が再開された。現場隊員が屋根上や2階で救助を待つ住民に対し、現状や今後の救助方針について説明・声掛けを行い、安心確保に努めている。	現場は流木・瓦礫の漂流が続き、救助活動は安全確認を徹底しつつ段階的に再開。警察・自衛隊とも連携中。道路名を聞かれた場合：「路線番号は不明ですが、北船橋町公園近くの住宅地です」。	標高11.3m前後、平均傾斜0.6%の極めて緩やかな低地。淀川氾濫流が住宅地全体に広がりやすく、排水困難。高台や迂回路がなく、孤立化リスクが高い。	現場指揮本部主導による救助活動再開、住民への状況説明・安心確保、関係機関との連携強化訓練	現場安全対策を講じたうえでの救助活動再開段階。追加資機材・人員投入後、指揮命令系統のもとで住民救助を効率的に進める。住民への状況説明や安心確保のコミュニケーションも重視。	現場指揮本部の指示に基づく救助活動の再開、住民への状況説明・声掛け、要配慮者の優先救助、現場安全確認の継続、関係機関（警察・自衛隊・自治体）との連携強化、救助活動の進捗報告。	流木・瓦礫による救助活動の危険、住民の不安増大、追加資機材の運用調整、現場指揮系統の混乱防止、通信手段維持の困難	3.0m前後の浸水が住宅1階全体・2階・屋根上避難が継続（24時間未満継続予想）	住宅被害（床上浸水・屋根上避難）・住民孤立・救助活動再開	住宅1階全体が浸水し、住民は2階や屋根上に避難。現場指揮本部の設置・追加資機材の到着により、救助活動が再開。住民の中には体調不良や移動困難者も含まれ、現場では住民への状況説明や安心確保のための声掛けが行われている。	現場安全確保（立入規制・流木除去）、追加資機材・人員の迅速運用、現場指揮本部による指揮系統強化、住民への状況説明・安心確保、要配慮者の優先救助、危険区域の立入制限、関係機関との情報共有・連携	平成30年7月豪雨（西日本豪雨）で淀川流域の低地住宅地にて同様の床上浸水・屋根上避難・孤立事例多数。岡山県真備町等で救助活動再開時の現場安全管理や住民対応が課題となった。	['住宅の床上浸水による住民の孤立・生命危険', '流木・瓦礫による救助活動中の隊員・住民の負傷', '屋根上避難者の健康悪化・転落リスク', '救助活動中の現場混乱・指揮系統の乱れ']	['地域の長期的孤立化', '感染症・衛生環境の悪化', '救助活動中のさらなる二次災害（流れの強い水中での事故・資機材損壊）']
		1-13	544.938	発災から64分	救助住民の一時収容・現場応急医療対応の開始	消防	○○付近（住所：枚方市北船橋町25、UTM座標：〇〇〇〇〇〇）で、救助活動により屋根上・2階から救出された住民の一部が現場救護所に一時収容されている。複数の住民が低体温や脱水症状を訴えており、現場応急手当班が対応中。	救助住民には高齢者や持病を持つ方が複数名含まれる。警察・自衛隊・医療機関とも情報共有済み。道路名を聞かれた場合：「路線番号は不明ですが、北船橋町公園近くの住宅地です」。	標高11.3m前後、極めて緩やかな傾斜（0.6%）の低地で、淀川氾濫流が住宅地全体に波及しやすい。排水困難で高台や迂回路もなく孤立リスクが高い。	救助活動後の住民ケア、現場応急医療体制の訓練、要配慮者の健康管理・医療搬送判断、関係機関連携の強化	救助活動再開後の住民救出・応急医療対応段階。高齢者や持病持ちの住民への現場医療対応、搬送判断、現場医療班・関係機関連携が訓練ポイント。	救助住民の健康状態確認、現場応急手当（低体温・脱水・持病悪化対応）、医療機関搬送の要否判断、追加医療資機材要請、住民への状況説明・安心確保、警察・自衛隊・医療機関との連携、救助活動記録・報告	救助住民の体調悪化や搬送遅延、現場医療資機材の不足、救助活動中の安全確保、住民のパニックや不安拡大、通信手段の維持、関係機関連携の遅れ	3.0m前後の浸水が住宅1階全体・2階・屋根上避難が継続（24時間未満継続予想）	住宅被害（床上浸水・屋根上避難）・住民孤立・救助活動・応急医療対応	住宅1階全体が浸水し、住民は2階や屋根上に避難していたが、救助活動再開により順次救出。長時間の孤立や浸水による低体温症・脱水・持病悪化等が複数発生し、現場で応急手当や医療搬送判断が必要となっている。	早期避難指示・勧告、要支援者リストによる個別支援、現場応急手当班の配置、医療機関との連携体制強化、救助活動中の安全管理、住民への状況説明・安心確保、関係機関との情報共有・連携	平成30年7月豪雨（西日本豪雨）岡山県真備町で床上浸水・屋根上避難・孤立住民の救助後、現場での応急手当や医療搬送が多数発生した事例あり。	['住宅の床上浸水による住民の孤立・生命危険', '救助住民の体調悪化・低体温症・持病の急変', '救助活動中の隊員・住民の負傷']	['感染症・衛生環境の悪化', '救助活動中のさらなる二次災害（流木衝突・感電等）', '医療搬送の遅延による健康被害']
		1-14	544.938	発災から67分	救助住民の医療機関搬送調整と家族・近隣住民への安否説明	消防	○○付近（住所：枚方市北船橋町25、UTM座標：〇〇〇〇〇〇）の現場救護所で、救助された住民のうち体調不良や持病悪化が認められる数名について、現場から医療機関への搬送調整が始まった。現場には家族や近隣住民が安否確認や搬送状況の説明を求めて集まりつつある。	搬送対象には高齢者・持病持ち・低体温症の方が含まれる。警察・自衛隊・医療機関と連携中。道路名を聞かれた場合：「路線番号は不明ですが、北船橋町公園近くの住宅地です」。	標高11.3m前後、極めて緩やかな傾斜（0.6%）の低地で、淀川氾濫流が住宅地全体に波及しやすい。排水困難で高台や迂回路もなく孤立リスクが高い。	広域搬送体制の訓練、医療機関との連携、搬送優先順位判断、現場～搬送先間の情報伝達・調整、住民・家族への説明体制の確認	現場応急手当後の住民広域搬送段階。救助活動の終息に向けて、医療機関との連携・搬送ルート確保・搬送優先順位判断・現場～搬送先間の情報共有、住民・家族への説明体制強化が訓練のポイント。	搬送対象者の優先順位付け、救急車・ドクターヘリ等の搬送手段調整、搬送ルートの安全確認、現場から医療機関への情報連携、住民・家族への説明、搬送記録の作成、関係機関との連携強化。	搬送対象者多数による優先順位判断の難しさ、搬送ルートの冠水・障害物による遅延、救急車・ヘリの運用調整、医療機関の受入体制調整、住民・家族の不安増大、現場と搬送先間の情報伝達遅延	3.0m前後の浸水が住宅1階全体・2階・屋根上避難が継続（24時間未満継続予想）	住宅被害（床上浸水・屋根上避難）・住民孤立・救助活動・広域医療搬送	住宅1階全体が浸水し、住民は2階や屋根上に避難していたが、救助活動再開により順次救出。長時間の孤立や浸水による低体温症・脱水・持病悪化等が複数発生し、現場で応急手当や医療機関への搬送調整が必要となっている。家族や近隣住民からの安否確認や搬送状況の問い合わせも増加している。	早期避難指示・勧告、要支援者リストによる個別支援、現場応急手当班・医療機関との連携体制強化、搬送ルートの事前確保・安全確認、搬送優先順位判断基準の整備、住民・家族への説明体制強化、関係機関との情報共有・連携	平成30年7月豪雨（西日本豪雨）岡山県真備町で床上浸水・屋根上避難・孤立住民の救助後、現場からの広域医療搬送が多数発生し、搬送ルートの冠水・渋滞・現場～搬送先間の連携が課題となった事例あり。	['住宅の床上浸水による住民の孤立・生命危険', '救助住民の体調悪化・低体温症・持病の急変', '搬送中の体調急変・搬送遅延']	['感染症・衛生環境の悪化', '搬送ルートの冠水・障害物による遅延', '医療機関の受入超過・連携遅延']
		1-15	544.938	発災から73分	現場救助活動の終息・最終安否確認と撤収準備	消防	○○付近（住所：枚方市北船橋町25、UTM座標：〇〇〇〇〇〇）の住宅地で、救助活動がほぼ完了し、現場指揮本部より『現地に残る住民の最終安否確認と、救助隊・資機材の安全な撤収準備を開始する』との通達。現場では一部住民の所在確認が続いているが、多数の住民は既に搬送・避難済み。	安否不明住民の中には連絡が取れない方が数名含まれる。警察・自衛隊・医療機関と引き続き連携。道路名を聞かれた場合：「路線番号は不明ですが、北船橋町公園近くの住宅地です」。	標高11.3m前後、極めて緩やかな傾斜（0.6%）の低地で、淀川氾濫流が住宅地全体に波及しやすい。排水困難で高台や迂回路もなく孤立リスクが高い。	救助活動終息段階での住民安否確認・行方不明者捜索、現場撤収判断、関係機関連携体制の確認訓練	救助活動の終息に伴い、全住民の安否確認・行方不明者捜索、現場隊員・資機材の安全な撤収を段階的に進める。現場指揮本部・関係機関の連携・情報共有が重要な訓練ポイント。	残る住民の安否確認、行方不明者の捜索・情報収集、現場資機材の撤収準備、関係機関との撤収調整、住民・家族への状況説明、撤収後の現場安全管理（立入規制等）、活動記録・報告作成。	安否不明住民の捜索難航、現場撤収中の安全確保、資機材損耗・紛失、住民・家族の不安増大、現場と本部間の情報伝達遅延	3.0m前後の浸水が住宅1階全体・2階・屋根上避難が継続（24時間未満継続予想）	住宅被害（床上浸水・屋根上避難）・住民孤立・救助活動終息・安否確認・現場撤収	住宅1階全体が長時間浸水し、住民は2階や屋根上に避難していた。救助活動・広域搬送がほぼ完了し、現場では安否不明住民の捜索と残留者の確認、撤収準備が進行中。現場の安全管理と情報共有が重要。	早期避難指示・勧告、要支援者リストによる個別支援、現場応急手当班・医療機関との連携体制強化、撤収時の安全管理、安否確認・行方不明者捜索の徹底、住民・家族への説明体制強化、関係機関との情報共有・連携	平成30年7月豪雨（西日本豪雨）岡山県真備町で床上浸水・屋根上避難・孤立住民の救助活動終息後、安否確認・撤収段階での捜索・情報共有・住民対応が重要課題となった事例あり。	['安否不明住民の生命危険', '撤収作業中の隊員・住民の安全リスク', '現場撤収遅延・資機材損耗']	['感染症・衛生環境の悪化', '住民・家族の不安増大', '現場と本部間の情報伝達遅延']
		1-16	544.938	発災から79分	現場撤収・活動記録整理と住民・家族への最終状況説明	消防	○○付近（住所：枚方市北船橋町25、UTM座標：〇〇〇〇〇〇）の住宅地で、救助活動・安否確認が完了し、現場指揮本部より『救助隊・資機材の撤収作業を本格開始。現場活動記録と住民・家族への最終状況説明を実施する』との通達。	撤収作業中も住民や家族から状況確認の問い合わせが続いている。警察・自衛隊・医療機関と連携し、最終的な住民名簿・安否リストを整理中。道路名を聞かれた場合：「路線番号は不明ですが、北船橋町公園近くの住宅地です」。	標高11.3m前後、極めて緩やかな傾斜（0.6%）の低地で、淀川氾濫流が住宅地全体に波及しやすい。排水困難で高台や迂回路もなく孤立リスクが高い。	救助活動終息後の撤収・記録整理、住民・家族への説明体制、現場の安全管理・情報共有の確認訓練	救助活動が完全に終息し、撤収・記録整理・住民対応の最終段階。住民・家族への説明や現場安全管理、関係機関連携の確認が訓練ポイント。	撤収作業の安全管理、資機材の点検・整理、住民・家族への最終説明・状況報告、安否確認リストの確定・共有、現場の立入規制・安全措置、活動記録・報告書の作成、関係機関との最終調整。	撤収作業中の事故・負傷、資機材の紛失・損傷、住民・家族への説明対応の遅延、安否確認リストの整合性確保、現場と本部間の情報伝達遅延	3.0m前後の浸水が住宅1階全体・2階・屋根上避難が継続（24時間未満継続予想）	住宅被害（床上浸水・屋根上避難）・住民孤立・救助活動終息・撤収・記録整理	住宅1階全体が長時間浸水し、住民は2階や屋根上に避難していた。救助活動・広域搬送・安否確認が完了し、現場では資機材撤収・記録整理・住民対応が進行中。現場の安全管理と住民・家族への説明が中心課題。	撤収時の安全管理、活動記録の正確な作成、住民・家族への説明体制強化、安否確認リストの整合性確保、関係機関との情報共有・連携、現場の立入規制・安全措置	平成30年7月豪雨（西日本豪雨）岡山県真備町で床上浸水・屋根上避難・孤立住民の救助活動終息後、撤収・記録整理・住民対応が重要課題となった事例あり。	['撤収作業中の隊員・住民の安全リスク', '資機材の紛失・損傷', '住民・家族への説明対応の遅延']	['感染症・衛生環境の悪化', '住民・家族の不安増大', '現場と本部間の情報伝達遅延']
		1-17	544.938	発災から84分	撤収作業の最終段階・活動記録の最終整理と現場立入規制の再確認	消防	○○付近（住所：枚方市北船橋町25、UTM座標：〇〇〇〇〇〇）の住宅地で、現場指揮本部より『救助隊・資機材の撤収作業が最終段階に入り、活動記録や安否確認リストの最終整理、現場立入規制の再確認を実施する』との通達。現場では住民・家族への最終状況説明や、警察・自衛隊・医療機関との撤収タイミング調整も進行中。	撤収作業はほぼ完了しているが、住民や家族からの状況確認問い合わせが継続。警察・自衛隊・医療機関と連携し、住民名簿・安否リストの最終確定を進行中。道路名を聞かれた場合：「路線番号は不明ですが、北船橋町公園近くの住宅地です」。	標高11.3m前後、極めて緩やかな傾斜（0.6%）の低地で、淀川氾濫流が住宅地全体に波及しやすい。排水困難で高台や迂回路もなく孤立リスクが高い。	撤収段階での記録整理・安否確認体制の最終確認、住民・家族への説明体制、現場管理・情報共有の徹底訓練	現場活動が完全に終息し、撤収・記録整理・安否確認の最終段階。現場管理や住民・家族への説明、関係機関連携・情報伝達の正確性が訓練ポイント。	安否確認リスト・活動記録の確定・本部提出、現場立入規制の再確認、資機材の最終点検・搬出、住民・家族への最終説明・状況報告、関係機関との撤収・現場管理の調整、活動報告書の作成。	撤収作業中の事故・負傷、資機材の紛失・損傷、住民・家族への説明対応の遅延、安否確認リストや活動記録の整合性確保、関係機関との調整遅延、現場と本部間の情報伝達遅延	3.0m前後の浸水が住宅1階全体・2階・屋根上避難が継続（24時間未満継続予想）	住宅被害（床上浸水・屋根上避難）・住民孤立・救助活動終息・撤収・記録整理	住宅1階全体が長時間浸水し、住民は2階や屋根上に避難していた。救助活動・広域搬送・安否確認が完了し、現場では資機材撤収・記録整理・住民対応が進行中。現場の安全管理と住民・家族への説明が中心課題。	撤収時の安全管理、活動記録の正確な作成、住民・家族への説明体制強化、安否確認リストの整合性確保、関係機関との情報共有・連携、現場の立入規制・安全措置	平成30年7月豪雨（西日本豪雨）岡山県真備町で床上浸水・屋根上避難・孤立住民の救助活動終息後、撤収・記録整理・住民対応が重要課題となった事例あり。	['撤収作業中の隊員・住民の安全リスク', '資機材の紛失・損傷', '住民・家族への説明対応の遅延']	['感染症・衛生環境の悪化', '住民・家族の不安増大', '現場と本部間の情報伝達遅延']
		1-18	544.938	発災から89分	現場閉鎖・管理引継ぎと問い合わせ対応窓口の設置	消防	○○付近（住所：枚方市北船橋町25、UTM座標：〇〇〇〇〇〇）の住宅地で、現場指揮本部より『全ての救助・安否確認・資機材撤収作業が完了し、現場は正式に閉鎖。今後は必要な関係機関への現場管理の引継ぎと、住民・家族への最終状況説明および問い合わせ対応を実施する』との通達。	現地では撤収後も住民や家族からの問い合わせが断続的に続いているため、問い合わせ窓口を設置。警察・自衛隊・医療機関と最終的な現場管理の引継ぎ調整を行う。道路名を聞かれた場合：「路線番号は不明ですが、北船橋町公園近くの住宅地です」。	標高11.3m前後、極めて緩やかな傾斜（0.6%）の低地で、淀川氾濫流が住宅地全体に波及しやすい。排水困難で高台や迂回路もなく孤立リスクが高い。	救助・撤収作業の完全終息と現場閉鎖、現場管理の円滑な引継ぎ、住民・家族への最終説明体制の確認訓練	全作業完了後の現場閉鎖・管理引継ぎ。住民・家族への説明、問い合わせ対応、関係機関間の連携・情報共有の最終確認が訓練ポイント。	現場閉鎖の宣言、現場管理の関係機関（警察・自衛隊等）への正式な引継ぎ、問い合わせ窓口の設置・運用、住民・家族への最終状況説明、活動記録・報告書の本部提出、現場立入規制の維持。	現場閉鎖後の住民・家族からの問い合わせ対応遅延、現場管理引継ぎの不備、資機材や記録の紛失、現場立入規制の徹底不足、関係機関間の情報伝達の行き違い	3.0m前後の浸水が住宅1階全体・2階・屋根上避難が継続（24時間未満継続予想）	住宅被害（床上浸水・屋根上避難）・住民孤立・救助活動終息・撤収・現場閉鎖	住宅1階全体が長時間浸水し、住民は2階や屋根上に避難していた。救助・搬送・安否確認・撤収作業が全て完了し、現場は閉鎖。今後は現場管理の関係機関への引継ぎと住民・家族への最終説明が必要。	撤収時の安全管理、現場管理の正式な引継ぎ体制、住民・家族への説明体制強化、問い合わせ窓口の設置、活動記録の正確な提出、現場立入規制の徹底、関係機関との情報共有	平成30年7月豪雨（西日本豪雨）岡山県真備町で床上浸水・屋根上避難・孤立住民の救助活動終息後、現場閉鎖・管理引継ぎ・住民対応が重要課題となった事例あり。	['現場閉鎖後の管理不備による安全リスク', '住民・家族への説明対応の遅延', '現場立入規制の徹底不足']	['感染症・衛生環境の悪化', '住民・家族の不安増大', '現場と本部間の情報伝達遅延']
		1-19	544.938	発災から92分	現場閉鎖後の住民・家族からの追加問い合わせ対応	住民	○○付近（住所：枚方市北船橋町25、UTM座標：〇〇〇〇〇〇）に住む家族や親族から、『救助された家族の所在が分からない』『現場の安全状況や立入可能か教えてほしい』などの問い合わせが災害対策本部や現場管理窓口に寄せられている。	現場管理は消防から警察・自治体に引き継がれており、問い合わせ窓口は市役所災害対策本部で継続運用中。避難所や安否確認リストは本部で一元管理。現場の立入は規制中。	標高11.3m前後、極めて緩やかな傾斜（0.6%）の低地で、淀川氾濫流が住宅地全体に波及しやすい。排水困難で高台や迂回路もなく孤立リスクが高い。	現場閉鎖後の住民・家族対応、問い合わせ窓口運用訓練、安否確認リスト・避難所情報の一元管理・情報伝達体制の確認	救助・撤収作業が全て完了し現場閉鎖後、住民や家族から問い合わせが継続的に発生する状況を想定。問い合わせ窓口の設置・運用や、安否確認リスト・避難所情報の一元管理・情報伝達が訓練のポイント。	問い合わせ窓口での丁寧な対応、安否確認リストや避難所情報の確認・案内、現場立入規制や安全状況の説明、問い合わせ内容の記録、必要に応じて関係機関への連絡・調整。	問い合わせ件数の増加による対応遅延、情報伝達の行き違い、現場閉鎖後の立入希望者対応、安否確認リストの整合性維持、住民・家族の不安や混乱の拡大	3.0m前後の浸水が住宅1階全体・2階・屋根上避難が継続（24時間未満継続予想）	住宅被害（床上浸水・屋根上避難）・住民孤立・現場閉鎖後の住民対応	住宅1階全体が長時間浸水し、住民は2階や屋根上に避難していた。救助・搬送・安否確認・撤収作業が全て完了し現場は閉鎖されたが、住民や家族からの安否や現場状況に関する問い合わせが続いている。現場管理は関係機関へ引継ぎ済み。	撤収後の問い合わせ窓口設置・運用、安否確認リスト・避難所情報の一元管理、現場立入規制の徹底、住民・家族への丁寧な説明体制、関係機関との情報共有、活動記録・問い合わせ記録の整備	平成30年7月豪雨（西日本豪雨）岡山県真備町などで、救助活動終息・現場閉鎖後も住民や家族からの問い合わせが殺到し、安否確認・情報提供体制の整備が課題となった事例あり。	['現場閉鎖後の管理不備による安全リスク', '住民・家族への説明対応の遅延', '現場立入規制の徹底不足']	['住民・家族の不安増大', '現場立入規制の徹底不足', '現場と本部間の情報伝達遅延']
		1-20	544.938	発災から97分	現場閉鎖後の追加問い合わせおよび最終状況整理	自治体職員	○○付近（住所：枚方市北船橋町25、UTM座標：〇〇〇〇〇〇）の現場閉鎖後、災害対策本部や問い合わせ窓口に『救助された家族の安否や搬送先、避難所での所在が分からない』『現場の立入可能時期や安全状況を知りたい』といった問い合わせが継続的に寄せられている。安否確認リストや避難所名簿との照合・整理が必要な状況。	現場管理は既に消防から警察・自治体に引き継がれており、問い合わせ窓口は市役所災害対策本部で運用中。避難所や安否確認リストは本部で一元管理。現場の立入は引き続き規制中。避難所には新たな住民の追加来所情報もあり。	標高11.3m前後、極めて緩やかな傾斜（0.6%）の低地で、淀川氾濫流が住宅地全体に波及しやすい。排水困難で高台や迂回路もなく孤立リスクが高い。	現場閉鎖後の住民・家族対応、問い合わせ窓口体制の運用訓練、避難所名簿・安否確認リストの整合・再整理、住民・家族への説明体制強化	救助・撤収・現場閉鎖後も住民や家族からの問い合わせが継続。問い合わせ窓口の運用、名簿・安否確認リストの一元管理・整合性確保、住民・家族への説明・安心確保が訓練のポイント。	問い合わせ窓口での丁寧な対応、安否確認リストや避難所情報の照合・案内、現場立入規制や安全状況の説明、問い合わせ内容の記録、名簿不一致時の追加確認・調整、必要に応じて関係機関への連絡・調整。	問い合わせ件数の増加による対応遅延、名簿と安否確認リストの不一致・照合遅延、情報伝達の行き違い、現場閉鎖後の立入希望者対応、住民・家族の不安や混乱の拡大	3.0m前後の浸水が住宅1階全体・2階・屋根上避難が継続（24時間未満継続予想）	住宅被害（床上浸水・屋根上避難）・住民孤立・現場閉鎖後の住民・家族対応	住宅1階全体が長時間浸水し、住民は2階や屋根上に避難していた。救助・搬送・安否確認・撤収作業が全て完了し現場は閉鎖されたが、住民や家族からの安否や現場状況に関する問い合わせが続いている。避難所への新規来所住民もあり、名簿・安否確認リストの照合が必要。	撤収後の問い合わせ窓口設置・運用、安否確認リスト・避難所情報の一元管理、現場立入規制の徹底、住民・家族への丁寧な説明体制、名簿・リストの整合性確保、関係機関との情報共有、活動記録・問い合わせ記録の整備	平成30年7月豪雨（西日本豪雨）岡山県真備町などで、救助活動終息・現場閉鎖後も住民や家族からの問い合わせが殺到し、安否確認・情報提供体制の整備が課題となった事例あり。	['現場閉鎖後の管理不備による安全リスク', '住民・家族への説明対応の遅延', '名簿・安否確認リストの整合性不備']	['住民・家族の不安増大', '現場立入規制の徹底不足', '現場と本部間の情報伝達遅延']
		1-21	544.938	発災から103分	現場閉鎖後の安否確認リスト・避難所情報の再照合および問い合わせ対応	自治体職員	○○付近（住所：枚方市北船橋町25、UTM座標：〇〇〇〇〇〇）の現場閉鎖後、災害対策本部や問い合わせ窓口に『避難した家族の安否や居場所が分からない』『避難所で会えない』『現場の安全状況や立入可能時期を知りたい』といった問い合わせが複数件寄せられている。安否確認リストや避難所名簿との照合・再整理を進めている。	現場管理は消防から警察・自治体に引き継がれており、問い合わせ窓口は市役所災害対策本部で継続運用中。避難所や安否確認リストは本部で一元管理。現場の立入は引き続き規制中。避難所には新たな住民の追加来所情報もあり。	標高11.3m前後、極めて緩やかな傾斜（0.6%）の低地で、淀川氾濫流が住宅地全体に波及しやすい。排水困難で高台や迂回路もなく孤立リスクが高い。	現場閉鎖後の住民・家族対応、問い合わせ窓口体制の運用訓練、避難所名簿・安否確認リストの整合・再整理、住民・家族への説明体制強化	救助・撤収・現場閉鎖後も住民や家族からの問い合わせが継続。問い合わせ窓口の運用、名簿・安否確認リストの一元管理・整合性確保、住民・家族への説明・安心確保が訓練のポイント。	問い合わせ窓口での丁寧な対応、安否確認リストや避難所情報の照合・案内、現場立入規制や安全状況の説明、問い合わせ内容の記録、名簿不一致時の追加確認・調整、必要に応じて関係機関への連絡・調整。	問い合わせ件数の増加による対応遅延、名簿と安否確認リストの不一致・照合遅延、情報伝達の行き違い、現場閉鎖後の立入希望者対応、住民・家族の不安や混乱の拡大	3.0m前後の浸水が住宅1階全体・2階・屋根上避難が継続（24時間未満継続予想）	住宅被害（床上浸水・屋根上避難）・住民孤立・現場閉鎖後の住民・家族対応	住宅1階全体が長時間浸水し、住民は2階や屋根上に避難していた。救助・搬送・安否確認・撤収作業が全て完了し現場は閉鎖されたが、住民や家族からの安否や現場状況に関する問い合わせが続いている。避難所への新規来所住民もあり、名簿・安否確認リストの照合が必要。	撤収後の問い合わせ窓口設置・運用、安否確認リスト・避難所情報の一元管理、現場立入規制の徹底、住民・家族への丁寧な説明体制、名簿・リストの整合性確保、関係機関との情報共有、活動記録・問い合わせ記録の整備	平成30年7月豪雨（西日本豪雨）岡山県真備町などで、救助活動終息・現場閉鎖後も住民や家族からの問い合わせが殺到し、安否確認・情報提供体制の整備が課題となった事例あり。	['現場閉鎖後の管理不備による安全リスク', '住民・家族への説明対応の遅延', '名簿・安否確認リストの整合性不備']	['住民・家族の不安増大', '現場立入規制の徹底不足', '現場と本部間の情報伝達遅延']
		1-22	544.938	発災から108分	現場閉鎖後の問い合わせ内容の追加整理と避難所情報の再確認（続報）	自治体職員	○○付近（住所：枚方市北船橋町25、UTM座標：〇〇〇〇〇〇）の現場閉鎖後、災害対策本部や問い合わせ窓口に『避難した家族の安否や居場所が分からない』『避難所で会えない』『新たに避難所に到着した住民の情報がある』などの問い合わせ・追加情報が引き続き寄せられている。避難所名簿・安否確認リストとの照合・再整理を継続中。	現場管理は既に消防から警察・自治体に引き継がれており、問い合わせ窓口は市役所災害対策本部で継続運用中。現場の立入は引き続き規制中。避難所には新たな住民の追加来所情報もあり。避難所間の移動や名簿記載漏れも確認されている。	標高11.3m前後、極めて緩やかな傾斜（0.6%）の低地で、淀川氾濫流が住宅地全体に波及しやすい。排水困難で高台や迂回路もなく孤立リスクが高い。	現場閉鎖後の住民・家族対応、問い合わせ窓口運用訓練、避難所名簿・安否確認リストの整合・再整理、住民・家族への説明体制強化	救助・撤収・現場閉鎖後も住民や家族からの問い合わせが継続。問い合わせ窓口の運用、名簿・安否確認リストの一元管理・整合性確保、住民・家族への説明・安心確保、避難所間移動や新規来所情報の追加整理が訓練のポイント。	問い合わせ窓口での丁寧な対応、安否確認リストや避難所情報の照合・案内、現場立入規制や安全状況の説明、問い合わせ内容の記録、名簿不一致時の追加確認・調整、避難所間の情報共有、必要に応じて関係機関への連絡・調整。	問い合わせ件数の増加による対応遅延、名簿と安否確認リストの不一致・照合遅延、避難所間の情報共有不足、情報伝達の行き違い、現場閉鎖後の立入希望者対応、住民・家族の不安や混乱の拡大	3.0m前後の浸水が住宅1階全体・2階・屋根上避難が継続（24時間未満継続予想）	住宅被害（床上浸水・屋根上避難）・住民孤立・現場閉鎖後の住民対応	住宅1階全体が長時間浸水し、住民は2階や屋根上に避難していた。救助・搬送・安否確認・撤収作業が全て完了し現場は閉鎖されたが、住民や家族からの安否や現場状況に関する問い合わせが続いている。避難所への新規来所住民もあり、名簿・安否確認リストの照合が必要。避難所間の移動や名簿記載漏れも発生している。	撤収後の問い合わせ窓口設置・運用、安否確認リスト・避難所情報の一元管理、現場立入規制の徹底、住民・家族への丁寧な説明体制、名簿・リストの整合性確保、避難所間の情報共有体制強化、関係機関との情報共有、活動記録・問い合わせ記録の整備	平成30年7月豪雨（西日本豪雨）岡山県真備町などで、救助活動終息・現場閉鎖後も住民や家族からの問い合わせが殺到し、安否確認・情報提供体制の整備や避難所間の情報共有が課題となった事例あり。	['現場閉鎖後の管理不備による安全リスク', '住民・家族への説明対応の遅延', '名簿・安否確認リストの整合性不備', '避難所間の情報共有不足']	['住民・家族の不安増大', '現場立入規制の徹底不足', '現場と本部間の情報伝達遅延']
		1-23	544.938	発災から113分	現場閉鎖後の問い合わせ内容の最終整理と避難所情報の再照合（続報）	自治体職員	○○付近（住所：枚方市北船橋町25、UTM座標：〇〇〇〇〇〇）の現場閉鎖後、災害対策本部や問い合わせ窓口に引き続き『避難した家族の安否や居場所が分からない』『避難所で会えない』『避難所に新たに到着した住民の情報がある』等の問い合わせや追加情報が寄せられている。避難所名簿や安否確認リストとの照合・再整理を続行中。	現場管理は既に消防から警察・自治体に引き継がれている。問い合わせ窓口は市役所災害対策本部で運用中。避難所には新たな住民の追加来所情報もあり、避難所間の移動や名簿記載漏れも散見されている。	標高11.3m前後、極めて緩やかな傾斜（0.6%）の低地で、淀川氾濫流が住宅地全体に波及しやすい。排水困難で高台や迂回路もなく孤立リスクが高い。	現場閉鎖後の住民・家族対応、問い合わせ窓口運用訓練、避難所名簿・安否確認リストの整合・再整理、住民・家族への説明体制強化	救助・撤収・現場閉鎖後も住民や家族からの問い合わせが継続。問い合わせ窓口の運用、名簿・安否確認リストの一元管理・整合性確保、住民・家族への説明・安心確保、避難所間移動や新規来所情報の追加整理が訓練のポイント。	問い合わせ窓口での丁寧な対応、安否確認リストや避難所情報の照合・案内、現場立入規制や安全状況の説明、問い合わせ内容の記録、名簿不一致時の追加確認・調整、避難所間の情報共有、必要に応じて関係機関への連絡・調整。	問い合わせ件数の増加による対応遅延、名簿と安否確認リストの不一致・照合遅延、避難所間の情報共有不足、情報伝達の行き違い、現場閉鎖後の立入希望者対応、住民・家族の不安や混乱の拡大	3.0m前後の浸水が住宅1階全体・2階・屋根上避難が継続（24時間未満継続予想）	住宅被害（床上浸水・屋根上避難）・住民孤立・現場閉鎖後の住民対応	住宅1階全体が長時間浸水し、住民は2階や屋根上に避難していた。救助・搬送・安否確認・撤収作業が全て完了し現場は閉鎖されたが、住民や家族からの安否や現場状況に関する問い合わせが続いている。避難所への新規来所住民もあり、名簿・安否確認リストの照合が必要。避難所間の移動や名簿記載漏れも発生している。	撤収後の問い合わせ窓口設置・運用、安否確認リスト・避難所情報の一元管理、現場立入規制の徹底、住民・家族への丁寧な説明体制、名簿・リストの整合性確保、避難所間の情報共有体制強化、関係機関との情報共有、活動記録・問い合わせ記録の整備	平成30年7月豪雨（西日本豪雨）岡山県真備町などで、救助活動終息・現場閉鎖後も住民や家族からの問い合わせが殺到し、安否確認・情報提供体制の整備や避難所間の情報共有が課題となった事例あり。	['現場閉鎖後の管理不備による安全リスク', '住民・家族への説明対応の遅延', '名簿・安否確認リストの整合性不備', '避難所間の情報共有不足']	['住民・家族の不安増大', '現場立入規制の徹底不足', '現場と本部間の情報伝達遅延']
		1-24	544.938	発災から119分	現場閉鎖後の問い合わせ内容の最終整理と避難所情報の再照合（続報）	自治体職員	○○付近（住所：枚方市北船橋町25、UTM座標：〇〇〇〇〇〇）の現場閉鎖後、災害対策本部や問い合わせ窓口に引き続き『避難した家族の安否や居場所が分からない』『避難所で会えない』『避難所に新たに到着した住民の情報がある』等の問い合わせや追加情報が寄せられている。避難所名簿や安否確認リストとの照合・再整理を続行中。	現場管理は既に消防から警察・自治体に引き継がれている。問い合わせ窓口は市役所災害対策本部で運用中。避難所には新たな住民の追加来所情報もあり、避難所間の移動や名簿記載漏れも散見されている。	標高11.3m前後、極めて緩やかな傾斜（0.6%）の低地で、淀川氾濫流が住宅地全体に波及しやすい。排水困難で高台や迂回路もなく孤立リスクが高い。	現場閉鎖後の住民・家族対応、問い合わせ窓口運用訓練、避難所名簿・安否確認リストの整合・再整理、住民・家族への説明体制強化	救助・撤収・現場閉鎖後も住民や家族からの問い合わせが継続。問い合わせ窓口の運用、名簿・安否確認リストの一元管理・整合性確保、住民・家族への説明・安心確保、避難所間移動や新規来所情報の追加整理が訓練のポイント。	問い合わせ窓口での丁寧な対応、安否確認リストや避難所情報の照合・案内、現場立入規制や安全状況の説明、問い合わせ内容の記録、名簿不一致時の追加確認・調整、避難所間の情報共有、必要に応じて関係機関への連絡・調整。	問い合わせ件数の増加による対応遅延、名簿と安否確認リストの不一致・照合遅延、避難所間の情報共有不足、情報伝達の行き違い、現場閉鎖後の立入希望者対応、住民・家族の不安や混乱の拡大	3.0m前後の浸水が住宅1階全体・2階・屋根上避難が継続（24時間未満継続予想）	住宅被害（床上浸水・屋根上避難）・住民孤立・現場閉鎖後の住民対応	住宅1階全体が長時間浸水し、住民は2階や屋根上に避難していた。救助・搬送・安否確認・撤収作業が全て完了し現場は閉鎖されたが、住民や家族からの安否や現場状況に関する問い合わせが続いている。避難所への新規来所住民もあり、名簿・安否確認リストの照合が必要。避難所間の移動や名簿記載漏れも発生している。	撤収後の問い合わせ窓口設置・運用、安否確認リスト・避難所情報の一元管理、現場立入規制の徹底、住民・家族への丁寧な説明体制、名簿・リストの整合性確保、避難所間の情報共有体制強化、関係機関との情報共有、活動記録・問い合わせ記録の整備	平成30年7月豪雨（西日本豪雨）岡山県真備町などで、救助活動終息・現場閉鎖後も住民や家族からの問い合わせが殺到し、安否確認・情報提供体制の整備や避難所間の情報共有が課題となった事例あり。	['現場閉鎖後の管理不備による安全リスク', '住民・家族への説明対応の遅延', '名簿・安否確認リストの整合性不備', '避難所間の情報共有不足']	['住民・家族の不安増大', '現場立入規制の徹底不足', '現場と本部間の情報伝達遅延']
		1-25	544.938	発災から124分	現場閉鎖後の問い合わせ内容の最終整理と避難所情報の再照合（続報）	自治体職員	○○付近（住所：枚方市北船橋町25、UTM座標：〇〇〇〇〇〇）の現場閉鎖後、災害対策本部や問い合わせ窓口に引き続き『避難した家族の安否や居場所が分からない』『避難所で会えない』『避難所に新たに到着した住民の情報がある』等の問い合わせや追加情報が寄せられている。避難所名簿や安否確認リストとの照合・再整理を続行中。	現場管理は既に消防から警察・自治体に引き継がれている。問い合わせ窓口は市役所災害対策本部で運用中。避難所には新たな住民の追加来所情報もあり、避難所間の移動や名簿記載漏れも散見されている。	標高11.3m前後、極めて緩やかな傾斜（0.6%）の低地で、淀川氾濫流が住宅地全体に波及しやすい。排水困難で高台や迂回路もなく孤立リスクが高い。	現場閉鎖後の住民・家族対応、問い合わせ窓口運用訓練、避難所名簿・安否確認リストの整合・再整理、住民・家族への説明体制強化	救助・撤収・現場閉鎖後も住民や家族からの問い合わせが継続。問い合わせ窓口の運用、名簿・安否確認リストの一元管理・整合性確保、住民・家族への説明・安心確保、避難所間移動や新規来所情報の追加整理が訓練のポイント。	問い合わせ窓口での丁寧な対応、安否確認リストや避難所情報の照合・案内、現場立入規制や安全状況の説明、問い合わせ内容の記録、名簿不一致時の追加確認・調整、避難所間の情報共有、必要に応じて関係機関への連絡・調整。	問い合わせ件数の増加による対応遅延、名簿と安否確認リストの不一致・照合遅延、避難所間の情報共有不足、情報伝達の行き違い、現場閉鎖後の立入希望者対応、住民・家族の不安や混乱の拡大	3.0m前後の浸水が住宅1階全体・2階・屋根上避難が継続（24時間未満継続予想）	住宅被害（床上浸水・屋根上避難）・住民孤立・現場閉鎖後の住民対応	住宅1階全体が長時間浸水し、住民は2階や屋根上に避難していた。救助・搬送・安否確認・撤収作業が全て完了し現場は閉鎖されたが、住民や家族からの安否や現場状況に関する問い合わせが続いている。避難所への新規来所住民もあり、名簿・安否確認リストの照合が必要。避難所間の移動や名簿記載漏れも発生している。	撤収後の問い合わせ窓口設置・運用、安否確認リスト・避難所情報の一元管理、現場立入規制の徹底、住民・家族への丁寧な説明体制、名簿・リストの整合性確保、避難所間の情報共有体制強化、関係機関との情報共有、活動記録・問い合わせ記録の整備	平成30年7月豪雨（西日本豪雨）岡山県真備町などで、救助活動終息・現場閉鎖後も住民や家族からの問い合わせが殺到し、安否確認・情報提供体制の整備や避難所間の情報共有が課題となった事例あり。	['現場閉鎖後の管理不備による安全リスク', '住民・家族への説明対応の遅延', '名簿・安否確認リストの整合性不備', '避難所間の情報共有不足']	['住民・家族の不安増大', '現場立入規制の徹底不足', '現場と本部間の情報伝達遅延']
		1-26	544.938	発災から126分	現場閉鎖後の問い合わせ内容の最終整理と避難所情報の再照合（続報）	自治体職員	○○付近（住所：枚方市北船橋町25、UTM座標：〇〇〇〇〇〇）の現場閉鎖後、災害対策本部や問い合わせ窓口に引き続き『避難した家族の安否や居場所が分からない』『避難所で会えない』『避難所に新たに到着した住民の情報がある』等の問い合わせや追加情報が寄せられている。避難所名簿や安否確認リストとの照合・再整理を続行中。	現場管理は既に消防から警察・自治体に引き継がれている。問い合わせ窓口は市役所災害対策本部で運用中。避難所には新たな住民の追加来所情報もあり、避難所間の移動や名簿記載漏れも散見されている。	標高11.3m前後、極めて緩やかな傾斜（0.6%）の低地で、淀川氾濫流が住宅地全体に波及しやすい。排水困難で高台や迂回路もなく孤立リスクが高い。	現場閉鎖後の住民・家族対応、問い合わせ窓口運用訓練、避難所名簿・安否確認リストの整合・再整理、住民・家族への説明体制強化	救助・撤収・現場閉鎖後も住民や家族からの問い合わせが継続。問い合わせ窓口の運用、名簿・安否確認リストの一元管理・整合性確保、住民・家族への説明・安心確保、避難所間移動や新規来所情報の追加整理が訓練のポイント。	問い合わせ窓口での丁寧な対応、安否確認リストや避難所情報の照合・案内、現場立入規制や安全状況の説明、問い合わせ内容の記録、名簿不一致時の追加確認・調整、避難所間の情報共有、必要に応じて関係機関への連絡・調整。	問い合わせ件数の増加による対応遅延、名簿と安否確認リストの不一致・照合遅延、避難所間の情報共有不足、情報伝達の行き違い、現場閉鎖後の立入希望者対応、住民・家族の不安や混乱の拡大	3.0m前後の浸水が住宅1階全体・2階・屋根上避難が継続（24時間未満継続予想）	住宅被害（床上浸水・屋根上避難）・住民孤立・現場閉鎖後の住民対応	住宅1階全体が長時間浸水し、住民は2階や屋根上に避難していた。救助・搬送・安否確認・撤収作業が全て完了し現場は閉鎖されたが、住民や家族からの安否や現場状況に関する問い合わせが続いている。避難所への新規来所住民もあり、名簿・安否確認リストの照合が必要。避難所間の移動や名簿記載漏れも発生している。	撤収後の問い合わせ窓口設置・運用、安否確認リスト・避難所情報の一元管理、現場立入規制の徹底、住民・家族への丁寧な説明体制、名簿・リストの整合性確保、避難所間の情報共有体制強化、関係機関との情報共有、活動記録・問い合わせ記録の整備	平成30年7月豪雨（西日本豪雨）岡山県真備町などで、救助活動終息・現場閉鎖後も住民や家族からの問い合わせが殺到し、安否確認・情報提供体制の整備や避難所間の情報共有が課題となった事例あり。	['現場閉鎖後の管理不備による安全リスク', '住民・家族への説明対応の遅延', '名簿・安否確認リストの整合性不備', '避難所間の情報共有不足']	['住民・家族の不安増大', '現場立入規制の徹底不足', '現場と本部間の情報伝達遅延']
		1-27	544.938	発災から133分	現場閉鎖後の問い合わせ内容の最終整理と避難所情報の再照合（続報）	自治体職員	○○付近（住所：枚方市北船橋町25、UTM座標：〇〇〇〇〇〇）の現場閉鎖後、災害対策本部や問い合わせ窓口に引き続き『避難した家族の安否や居場所が分からない』『避難所で会えない』『避難所に新たに到着した住民の情報がある』等の問い合わせや追加情報が寄せられている。避難所名簿や安否確認リストとの照合・再整理を続行中。	現場管理は既に消防から警察・自治体に引き継がれている。問い合わせ窓口は市役所災害対策本部で運用中。避難所には新たな住民の追加来所情報もあり、避難所間の移動や名簿記載漏れも散見されている。	標高11.3m前後、極めて緩やかな傾斜（0.6%）の低地で、淀川氾濫流が住宅地全体に波及しやすい。排水困難で高台や迂回路もなく孤立リスクが高い。	現場閉鎖後の住民・家族対応、問い合わせ窓口運用訓練、避難所名簿・安否確認リストの整合・再整理、住民・家族への説明体制強化	救助・撤収・現場閉鎖後も住民や家族からの問い合わせが継続。問い合わせ窓口の運用、名簿・安否確認リストの一元管理・整合性確保、住民・家族への説明・安心確保、避難所間移動や新規来所情報の追加整理が訓練のポイント。	問い合わせ窓口での丁寧な対応、安否確認リストや避難所情報の照合・案内、現場立入規制や安全状況の説明、問い合わせ内容の記録、名簿不一致時の追加確認・調整、避難所間の情報共有、必要に応じて関係機関への連絡・調整。	問い合わせ件数の増加による対応遅延、名簿と安否確認リストの不一致・照合遅延、避難所間の情報共有不足、情報伝達の行き違い、現場閉鎖後の立入希望者対応、住民・家族の不安や混乱の拡大	3.0m前後の浸水が住宅1階全体・2階・屋根上避難が継続（24時間未満継続予想）	住宅被害（床上浸水・屋根上避難）・住民孤立・現場閉鎖後の住民対応	住宅1階全体が長時間浸水し、住民は2階や屋根上に避難していた。救助・搬送・安否確認・撤収作業が全て完了し現場は閉鎖されたが、住民や家族からの安否や現場状況に関する問い合わせが続いている。避難所への新規来所住民もあり、名簿・安否確認リストの照合が必要。避難所間の移動や名簿記載漏れも発生している。	撤収後の問い合わせ窓口設置・運用、安否確認リスト・避難所情報の一元管理、現場立入規制の徹底、住民・家族への丁寧な説明体制、名簿・リストの整合性確保、避難所間の情報共有体制強化、関係機関との情報共有、活動記録・問い合わせ記録の整備	平成30年7月豪雨（西日本豪雨）岡山県真備町などで、救助活動終息・現場閉鎖後も住民や家族からの問い合わせが殺到し、安否確認・情報提供体制の整備や避難所間の情報共有が課題となった事例あり。	['現場閉鎖後の管理不備による安全リスク', '住民・家族への説明対応の遅延', '名簿・安否確認リストの整合性不備', '避難所間の情報共有不足']	['住民・家族の不安増大', '現場立入規制の徹底不足', '現場と本部間の情報伝達遅延']
		1-28	544.938	発災から138分	現場閉鎖後の夜間追加問い合わせ・避難所間移動住民の照合要請	自治体職員	○○付近（住所：枚方市北船橋町25、UTM座標：〇〇〇〇〇〇）の災害対策本部や問い合わせ窓口に、夜間になって『避難所で家族に会えない』『新たに避難所に到着した住民がいる』『避難所間で住民の移動があったが名簿に反映されていない』などの問い合わせや情報提供が寄せられている。名簿・安否確認リストの再照合と避難所間の情報共有が求められている。	夜間のため避難所職員・自治体職員とも人員が限られており、名簿更新や問い合わせ対応に遅れが出ている。避難所間の移動住民については翌朝再点検予定。現場の立入は引き続き規制中。	標高11.3m前後、極めて緩やかな傾斜（0.6%）の低地で、淀川氾濫流が住宅地全体に波及しやすい。排水困難で高台や迂回路もなく孤立リスクが高い。	現場閉鎖後の夜間住民・家族対応、名簿・安否確認リスト・避難所情報の再照合、避難所間の情報共有体制強化、問い合わせ窓口運用訓練	夜間に避難所間移動や新規来所住民が発生し、名簿・安否確認リストの整合性確保が困難となる。夜間の人員・体制不足下での問い合わせ対応、避難所間の情報伝達・共有、住民・家族への説明体制が訓練ポイント。	問い合わせ窓口での丁寧な対応、名簿・安否確認リスト・避難所情報の再照合、避難所間の情報共有・連絡体制の確立、夜間の問い合わせ内容記録、名簿不一致時の追加確認・調整、住民・家族への状況説明、必要に応じて翌朝の再点検計画の策定。	夜間の人員・体制不足による対応遅延、名簿と安否確認リストの不一致・照合遅延、避難所間の情報共有不足、住民・家族の不安や混乱の拡大、問い合わせ件数の増加による記録・整理の遅延	3.0m前後の浸水が住宅1階全体・2階・屋根上避難が継続（24時間未満継続予想）	住宅被害（床上浸水・屋根上避難）・住民孤立・現場閉鎖後の住民・家族対応	住宅1階全体が長時間浸水し、住民は2階や屋根上に避難していた。救助・搬送・安否確認・撤収作業が全て完了し現場は閉鎖されたが、夜間になっても住民や家族からの安否や現場状況に関する問い合わせが続き、避難所間の移動や新規来所住民による名簿・安否確認リストの照合が必要。夜間の人員・体制不足が課題。	撤収後の問い合わせ窓口設置・運用、安否確認リスト・避難所情報の一元管理、現場立入規制の徹底、夜間も含めた名簿・リストの整合性確保、避難所間の情報共有体制強化、住民・家族への丁寧な説明体制、活動記録・問い合わせ記録の整備	平成30年7月豪雨（西日本豪雨）岡山県真備町等で、救助活動終息・現場閉鎖後も住民や家族からの問い合わせや避難所間の名簿不一致・情報共有不足が課題となった事例あり。	['現場閉鎖後の管理不備による安全リスク', '住民・家族への説明対応の遅延', '名簿・安否確認リストの整合性不備', '避難所間の情報共有不足']	['住民・家族の不安増大', '現場立入規制の徹底不足', '現場と本部間の情報伝達遅延']
		1-29	544.938	発災から143分	現場閉鎖後の夜間追加問い合わせ・避難所間移動住民の照合要請（続報）	自治体職員	○○付近（住所：枚方市北船橋町25、UTM座標：〇〇〇〇〇〇）の災害対策本部や問い合わせ窓口に、夜間になっても『避難所で家族に会えない』『避難所間で住民の移動があったが名簿に反映されていない』『新たに避難所に到着した住民がいる』といった問い合わせや情報提供が引き続き寄せられている。名簿・安否確認リストの再照合と避難所間の情報共有が求められている。	夜間のため避難所職員・自治体職員とも人員が限られており、名簿更新や問い合わせ対応に遅れが出ている。避難所間の移動住民については翌朝再点検予定。現場の立入は引き続き規制中。	標高11.3m前後、極めて緩やかな傾斜（0.6%）の低地で、淀川氾濫流が住宅地全体に波及しやすい。排水困難で高台や迂回路もなく孤立リスクが高い。	現場閉鎖後の夜間住民・家族対応、名簿・安否確認リスト・避難所情報の再照合、避難所間の情報共有体制強化、問い合わせ窓口運用訓練	夜間に避難所間移動や新規来所住民が発生し、名簿・安否確認リストの整合性確保が困難となる。夜間の人員・体制不足下での問い合わせ対応、避難所間の情報伝達・共有、住民・家族への説明体制が訓練ポイント。	問い合わせ窓口での丁寧な対応、名簿・安否確認リスト・避難所情報の再照合、避難所間の情報共有・連絡体制の確立、夜間の問い合わせ内容記録、名簿不一致時の追加確認・調整、住民・家族への状況説明、必要に応じて翌朝の再点検計画の策定。	夜間の人員・体制不足による対応遅延、名簿と安否確認リストの不一致・照合遅延、避難所間の情報共有不足、住民・家族の不安や混乱の拡大、問い合わせ件数の増加による記録・整理の遅延	3.0m前後の浸水が住宅1階全体・2階・屋根上避難が継続（24時間未満継続予想）	住宅被害（床上浸水・屋根上避難）・住民孤立・現場閉鎖後の住民・家族対応	住宅1階全体が長時間浸水し、住民は2階や屋根上に避難していた。救助・搬送・安否確認・撤収作業が全て完了し現場は閉鎖されたが、夜間になっても住民や家族からの安否や現場状況に関する問い合わせが続き、避難所間の移動や新規来所住民による名簿・安否確認リストの照合が必要。夜間の人員・体制不足が課題。	撤収後の問い合わせ窓口設置・運用、安否確認リスト・避難所情報の一元管理、現場立入規制の徹底、夜間も含めた名簿・リストの整合性確保、避難所間の情報共有体制強化、住民・家族への丁寧な説明体制、活動記録・問い合わせ記録の整備	平成30年7月豪雨（西日本豪雨）岡山県真備町等で、救助活動終息・現場閉鎖後も住民や家族からの問い合わせや避難所間の名簿不一致・情報共有不足が課題となった事例あり。	['現場閉鎖後の管理不備による安全リスク', '住民・家族への説明対応の遅延', '名簿・安否確認リストの整合性不備', '避難所間の情報共有不足']	['住民・家族の不安増大', '現場立入規制の徹底不足', '現場と本部間の情報伝達遅延']
		1-30	544.938	発災から147分	夜間の避難所問い合わせ件数増加と名簿・安否確認リストの最終照合要請	自治体職員	○○付近（住所：枚方市北船橋町25、UTM座標：〇〇〇〇〇〇）の災害対策本部や問い合わせ窓口に、夜間になり『避難所で家族に会えない』『避難所間で住民の移動があったが名簿に反映されていない』『新たに避難所に到着した住民の情報がある』などの問い合わせや情報提供がさらに増加している。夜間体制下で名簿・安否確認リストの再照合と避難所間の情報共有を要請。	夜間のため避難所職員・自治体職員とも人員が限られており、名簿更新や問い合わせ対応に遅れが出ている。避難所間の移動住民については翌朝再点検予定。現場の立入は引き続き規制中。	標高11.3m前後、極めて緩やかな傾斜（0.6%）の低地で、淀川氾濫流が住宅地全体に波及しやすい。排水困難で高台や迂回路もなく孤立リスクが高い。	現場閉鎖後の夜間住民・家族対応、名簿・安否確認リスト・避難所情報の再照合、避難所間の情報共有体制強化、問い合わせ窓口運用訓練	夜間に避難所間移動や新規来所住民が発生し、名簿・安否確認リストの整合性確保が困難となる。夜間の人員・体制不足下での問い合わせ対応、避難所間の情報伝達・共有、住民・家族への説明体制が訓練ポイント。	問い合わせ窓口での丁寧な対応、名簿・安否確認リスト・避難所情報の再照合、避難所間の情報共有・連絡体制の確立、夜間の問い合わせ内容記録、名簿不一致時の追加確認・調整、住民・家族への状況説明、必要に応じて翌朝の再点検計画の策定。	夜間の人員・体制不足による対応遅延、名簿と安否確認リストの不一致・照合遅延、避難所間の情報共有不足、住民・家族の不安や混乱の拡大、問い合わせ件数の増加による記録・整理の遅延	3.0m前後の浸水が住宅1階全体・2階・屋根上避難が継続（24時間未満継続予想）	住宅被害（床上浸水・屋根上避難）・住民孤立・現場閉鎖後の住民・家族対応	住宅1階全体が長時間浸水し、住民は2階や屋根上に避難していた。救助・搬送・安否確認・撤収作業が全て完了し現場は閉鎖されたが、夜間になっても住民や家族からの安否や現場状況に関する問い合わせが続き、避難所間の移動や新規来所住民による名簿・安否確認リストの照合が必要。夜間の人員・体制不足が課題。	撤収後の問い合わせ窓口設置・運用、安否確認リスト・避難所情報の一元管理、現場立入規制の徹底、夜間も含めた名簿・リストの整合性確保、避難所間の情報共有体制強化、住民・家族への丁寧な説明体制、活動記録・問い合わせ記録の整備	平成30年7月豪雨（西日本豪雨）岡山県真備町等で、救助活動終息・現場閉鎖後も住民や家族からの問い合わせや避難所間の名簿不一致・情報共有不足が課題となった事例あり。	['現場閉鎖後の管理不備による安全リスク', '住民・家族への説明対応の遅延', '名簿・安否確認リストの整合性不備', '避難所間の情報共有不足']	['住民・家族の不安増大', '現場立入規制の徹底不足', '現場と本部間の情報伝達遅延']
		1-31	544.938	発災から152分	夜間の避難所問い合わせ対応継続・安否確認リストの最終調整依頼	自治体職員	○○付近（住所：枚方市北船橋町25、UTM座標：〇〇〇〇〇〇）の災害対策本部や問い合わせ窓口に、夜間も引き続き『避難所で家族に会えない』『避難所間で住民の移動があったが名簿に反映されていない』『新たに避難所に到着した住民がいる』などの問い合わせや情報提供が続いている。夜間体制下で名簿・安否確認リストの再照合と避難所間の情報共有を再度要請。	夜間のため避難所職員・自治体職員とも人員が限られており、名簿更新や問い合わせ対応に遅れが出ている。避難所間の移動住民については翌朝再点検予定。現場の立入は引き続き規制中。	標高11.3m前後、極めて緩やかな傾斜（0.6%）の低地で、淀川氾濫流が住宅地全体に波及しやすい。排水困難で高台や迂回路もなく孤立リスクが高い。	現場閉鎖後の夜間住民・家族対応、名簿・安否確認リスト・避難所情報の再照合、避難所間の情報共有体制強化、問い合わせ窓口運用訓練	夜間に避難所間移動や新規来所住民が発生し、名簿・安否確認リストの整合性確保が困難となる。夜間の人員・体制不足下での問い合わせ対応、避難所間の情報伝達・共有、住民・家族への説明体制が訓練ポイント。	問い合わせ窓口での丁寧な対応、名簿・安否確認リスト・避難所情報の再照合、避難所間の情報共有・連絡体制の確立、夜間の問い合わせ内容記録、名簿不一致時の追加確認・調整、住民・家族への状況説明、必要に応じて翌朝の再点検計画の策定。	夜間の人員・体制不足による対応遅延、名簿と安否確認リストの不一致・照合遅延、避難所間の情報共有不足、住民・家族の不安や混乱の拡大、問い合わせ件数の増加による記録・整理の遅延	3.0m前後の浸水が住宅1階全体・2階・屋根上避難が継続（24時間未満継続予想）	住宅被害（床上浸水・屋根上避難）・住民孤立・現場閉鎖後の住民・家族対応	住宅1階全体が長時間浸水し、住民は2階や屋根上に避難していた。救助・搬送・安否確認・撤収作業が全て完了し現場は閉鎖されたが、夜間になっても住民や家族からの安否や現場状況に関する問い合わせが続き、避難所間の移動や新規来所住民による名簿・安否確認リストの照合が必要。夜間の人員・体制不足が課題。	撤収後の問い合わせ窓口設置・運用、安否確認リスト・避難所情報の一元管理、現場立入規制の徹底、夜間も含めた名簿・リストの整合性確保、避難所間の情報共有体制強化、住民・家族への丁寧な説明体制、活動記録・問い合わせ記録の整備	平成30年7月豪雨（西日本豪雨）岡山県真備町等で、救助活動終息・現場閉鎖後も住民や家族からの問い合わせや避難所間の名簿不一致・情報共有不足が課題となった事例あり。	['現場閉鎖後の管理不備による安全リスク', '住民・家族への説明対応の遅延', '名簿・安否確認リストの整合性不備', '避難所間の情報共有不足']	['住民・家族の不安増大', '現場立入規制の徹底不足', '現場と本部間の情報伝達遅延']
		1-32	544.938	発災から158分	夜間の避難所問い合わせ件数増加と名簿・安否確認リストの最終照合要請（続報）	自治体職員	○○付近（住所：枚方市北船橋町25、UTM座標：〇〇〇〇〇〇）の災害対策本部や問い合わせ窓口に、夜間になり『避難所で家族に会えない』『避難所間で住民の移動があったが名簿に反映されていない』『新たに避難所に到着した住民の情報がある』などの問い合わせや情報提供がさらに増加している。夜間体制下で名簿・安否確認リストの再照合と避難所間の情報共有を要請。	夜間のため避難所職員・自治体職員とも人員が限られており、名簿更新や問い合わせ対応に遅れが出ている。避難所間の移動住民については翌朝再点検予定。現場の立入は引き続き規制中。	標高11.3m前後、極めて緩やかな傾斜（0.6%）の低地で、淀川氾濫流が住宅地全体に波及しやすい。排水困難で高台や迂回路もなく孤立リスクが高い。	現場閉鎖後の夜間住民・家族対応、名簿・安否確認リスト・避難所情報の再照合、避難所間の情報共有体制強化、問い合わせ窓口運用訓練	夜間に避難所間移動や新規来所住民が発生し、名簿・安否確認リストの整合性確保が困難となる。夜間の人員・体制不足下での問い合わせ対応、避難所間の情報伝達・共有、住民・家族への説明体制が訓練ポイント。	問い合わせ窓口での丁寧な対応、名簿・安否確認リスト・避難所情報の再照合、避難所間の情報共有・連絡体制の確立、夜間の問い合わせ内容記録、名簿不一致時の追加確認・調整、住民・家族への状況説明、必要に応じて翌朝の再点検計画の策定。	夜間の人員・体制不足による対応遅延、名簿と安否確認リストの不一致・照合遅延、避難所間の情報共有不足、住民・家族の不安や混乱の拡大、問い合わせ件数の増加による記録・整理の遅延	3.0m前後の浸水が住宅1階全体・2階・屋根上避難が継続（24時間未満継続予想）	住宅被害（床上浸水・屋根上避難）・住民孤立・現場閉鎖後の住民・家族対応	住宅1階全体が長時間浸水し、住民は2階や屋根上に避難していた。救助・搬送・安否確認・撤収作業が全て完了し現場は閉鎖されたが、夜間になっても住民や家族からの安否や現場状況に関する問い合わせが続き、避難所間の移動や新規来所住民による名簿・安否確認リストの照合が必要。夜間の人員・体制不足が課題。	撤収後の問い合わせ窓口設置・運用、安否確認リスト・避難所情報の一元管理、現場立入規制の徹底、夜間も含めた名簿・リストの整合性確保、避難所間の情報共有体制強化、住民・家族への丁寧な説明体制、活動記録・問い合わせ記録の整備	平成30年7月豪雨（西日本豪雨）岡山県真備町等で、救助活動終息・現場閉鎖後も住民や家族からの問い合わせや避難所間の名簿不一致・情報共有不足が課題となった事例あり。	['現場閉鎖後の管理不備による安全リスク', '住民・家族への説明対応の遅延', '名簿・安否確認リストの整合性不備', '避難所間の情報共有不足']	['住民・家族の不安増大', '現場立入規制の徹底不足', '現場と本部間の情報伝達遅延']
		1-33	544.938	発災から163分	夜間の避難所問い合わせ件数増加と名簿・安否確認リストの最終照合要請（続報）	自治体職員	○○付近（住所：枚方市北船橋町25、UTM座標：〇〇〇〇〇〇）の災害対策本部や問い合わせ窓口に、夜間になり『避難所で家族に会えない』『避難所間で住民の移動があったが名簿に反映されていない』『新たに避難所に到着した住民の情報がある』などの問い合わせや情報提供がさらに増加している。夜間体制下で名簿・安否確認リストの再照合と避難所間の情報共有を要請。	夜間のため避難所職員・自治体職員とも人員が限られており、名簿更新や問い合わせ対応に遅れが出ている。避難所間の移動住民については翌朝再点検予定。現場の立入は引き続き規制中。	標高11.3m前後、極めて緩やかな傾斜（0.6%）の低地で、淀川氾濫流が住宅地全体に波及しやすい。排水困難で高台や迂回路もなく孤立リスクが高い。	現場閉鎖後の夜間住民・家族対応、名簿・安否確認リスト・避難所情報の再照合、避難所間の情報共有体制強化、問い合わせ窓口運用訓練	夜間に避難所間移動や新規来所住民が発生し、名簿・安否確認リストの整合性確保が困難となる。夜間の人員・体制不足下での問い合わせ対応、避難所間の情報伝達・共有、住民・家族への説明体制が訓練ポイント。	問い合わせ窓口での丁寧な対応、名簿・安否確認リスト・避難所情報の再照合、避難所間の情報共有・連絡体制の確立、夜間の問い合わせ内容記録、名簿不一致時の追加確認・調整、住民・家族への状況説明、必要に応じて翌朝の再点検計画の策定。	夜間の人員・体制不足による対応遅延、名簿と安否確認リストの不一致・照合遅延、避難所間の情報共有不足、住民・家族の不安や混乱の拡大、問い合わせ件数の増加による記録・整理の遅延	3.0m前後の浸水が住宅1階全体・2階・屋根上避難が継続（24時間未満継続予想）	住宅被害（床上浸水・屋根上避難）・住民孤立・現場閉鎖後の住民・家族対応	住宅1階全体が長時間浸水し、住民は2階や屋根上に避難していた。救助・搬送・安否確認・撤収作業が全て完了し現場は閉鎖されたが、夜間になっても住民や家族からの安否や現場状況に関する問い合わせが続き、避難所間の移動や新規来所住民による名簿・安否確認リストの照合が必要。夜間の人員・体制不足が課題。	撤収後の問い合わせ窓口設置・運用、安否確認リスト・避難所情報の一元管理、現場立入規制の徹底、夜間も含めた名簿・リストの整合性確保、避難所間の情報共有体制強化、住民・家族への丁寧な説明体制、活動記録・問い合わせ記録の整備	平成30年7月豪雨（西日本豪雨）岡山県真備町等で、救助活動終息・現場閉鎖後も住民や家族からの問い合わせや避難所間の名簿不一致・情報共有不足が課題となった事例あり。	['現場閉鎖後の管理不備による安全リスク', '住民・家族への説明対応の遅延', '名簿・安否確認リストの整合性不備', '避難所間の情報共有不足']	['住民・家族の不安増大', '現場立入規制の徹底不足', '現場と本部間の情報伝達遅延']
		1-34	544.938	発災から167分	夜間の避難所・安否確認問い合わせ対応体制の維持と名簿・リスト最終整理（続報）	自治体職員	○○付近（住所：枚方市北船橋町25、UTM座標：〇〇〇〇〇〇）の災害対策本部や問い合わせ窓口に、夜間も引き続き『避難所で家族に会えない』『避難所間で住民の移動があったが名簿に反映されていない』『新たに避難所に到着した住民の情報がある』などの問い合わせや情報提供が続いている。夜間体制下で名簿・安否確認リストの再照合と避難所間の情報共有が継続されている。	夜間のため避難所・自治体職員とも人員が限られており、名簿更新や問い合わせ対応に遅れが出ている。避難所間の移動住民については翌朝再点検予定。現場の立入は引き続き規制中。	標高11.3m前後、極めて緩やかな傾斜（0.6%）の低地で、淀川氾濫流が住宅地全体に波及しやすい。排水困難で高台や迂回路もなく孤立リスクが高い。	夜間の問い合わせ件数増加時における住民・家族対応、名簿・安否確認リスト・避難所情報の最終照合、避難所間の情報共有体制運用訓練。	夜間に避難所間移動や新規来所住民が発生し、名簿・安否確認リストの整合性確保が困難となる。夜間の人員・体制不足下での問い合わせ対応、避難所間の情報伝達・共有、住民・家族への説明体制が訓練ポイント。	問い合わせ窓口での丁寧な対応、名簿・安否確認リスト・避難所情報の再照合、避難所間の情報共有・連絡体制の確立、夜間の問い合わせ内容記録、名簿不一致時の追加確認・調整、住民・家族への状況説明、必要に応じて翌朝の再点検計画の策定。	夜間の人員・体制不足による対応遅延、名簿と安否確認リストの不一致・照合遅延、避難所間の情報共有不足、住民・家族の不安や混乱の拡大、問い合わせ件数の増加による記録・整理の遅延	3.0m前後の浸水が住宅1階全体・2階・屋根上避難が継続（24時間未満継続予想）	住宅被害（床上浸水・屋根上避難）・住民孤立・現場閉鎖後の住民・家族対応	住宅1階全体が長時間浸水し、住民は2階や屋根上に避難していた。救助・搬送・安否確認・撤収作業が全て完了し現場は閉鎖されたが、夜間になっても住民や家族からの安否や現場状況に関する問い合わせが続き、避難所間の移動や新規来所住民による名簿・安否確認リストの照合が必要。夜間の人員・体制不足が課題。	撤収後の問い合わせ窓口設置・運用、安否確認リスト・避難所情報の一元管理、現場立入規制の徹底、夜間も含めた名簿・リストの整合性確保、避難所間の情報共有体制強化、住民・家族への丁寧な説明体制、活動記録・問い合わせ記録の整備	平成30年7月豪雨（西日本豪雨）岡山県真備町等で、救助活動終息・現場閉鎖後も住民や家族からの問い合わせや避難所間の名簿不一致・情報共有不足が課題となった事例あり。	['現場閉鎖後の管理不備による安全リスク', '住民・家族への説明対応の遅延', '名簿・安否確認リストの整合性不備', '避難所間の情報共有不足']	['住民・家族の不安増大', '現場立入規制の徹底不足', '現場と本部間の情報伝達遅延']
		1-35	544.938	発災から174分	夜間の避難所・安否確認問い合わせ対応体制の維持と名簿・リスト最終整理（続報）	自治体職員	○○付近（住所：枚方市北船橋町25、UTM座標：〇〇〇〇〇〇）の災害対策本部や問い合わせ窓口に、夜間も引き続き『避難所で家族に会えない』『避難所間で住民の移動があったが名簿に反映されていない』『新たに避難所に到着した住民の情報がある』などの問い合わせや情報提供が続いている。夜間体制下で名簿・安否確認リストの再照合と避難所間の情報共有が継続されている。	夜間のため避難所・自治体職員とも人員が限られており、名簿更新や問い合わせ対応に遅れが出ている。避難所間の移動住民については翌朝再点検予定。現場の立入は引き続き規制中。	標高11.3m前後、極めて緩やかな傾斜（0.6%）の低地で、淀川氾濫流が住宅地全体に波及しやすい。排水困難で高台や迂回路もなく孤立リスクが高い。	夜間の問い合わせ件数増加時における住民・家族対応、名簿・安否確認リスト・避難所情報の最終照合、避難所間の情報共有体制運用訓練。	夜間に避難所間移動や新規来所住民が発生し、名簿・安否確認リストの整合性確保が困難となる。夜間の人員・体制不足下での問い合わせ対応、避難所間の情報伝達・共有、住民・家族への説明体制が訓練ポイント。	問い合わせ窓口での丁寧な対応、名簿・安否確認リスト・避難所情報の再照合、避難所間の情報共有・連絡体制の確立、夜間の問い合わせ内容記録、名簿不一致時の追加確認・調整、住民・家族への状況説明、必要に応じて翌朝の再点検計画の策定。	夜間の人員・体制不足による対応遅延、名簿と安否確認リストの不一致・照合遅延、避難所間の情報共有不足、住民・家族の不安や混乱の拡大、問い合わせ件数の増加による記録・整理の遅延	3.0m前後の浸水が住宅1階全体・2階・屋根上避難が継続（24時間未満継続予想）	住宅被害（床上浸水・屋根上避難）・住民孤立・現場閉鎖後の住民・家族対応	住宅1階全体が長時間浸水し、住民は2階や屋根上に避難していた。救助・搬送・安否確認・撤収作業が全て完了し現場は閉鎖されたが、夜間になっても住民や家族からの安否や現場状況に関する問い合わせが続き、避難所間の移動や新規来所住民による名簿・安否確認リストの照合が必要。夜間の人員・体制不足が課題。	撤収後の問い合わせ窓口設置・運用、安否確認リスト・避難所情報の一元管理、現場立入規制の徹底、夜間も含めた名簿・リストの整合性確保、避難所間の情報共有体制強化、住民・家族への丁寧な説明体制、活動記録・問い合わせ記録の整備	平成30年7月豪雨（西日本豪雨）岡山県真備町等で、救助活動終息・現場閉鎖後も住民や家族からの問い合わせや避難所間の名簿不一致・情報共有不足が課題となった事例あり。	['現場閉鎖後の管理不備による安全リスク', '住民・家族への説明対応の遅延', '名簿・安否確認リストの整合性不備', '避難所間の情報共有不足']	['住民・家族の不安増大', '現場立入規制の徹底不足', '現場と本部間の情報伝達遅延']
		1-36	544.938	発災から179分	夜間の避難所・安否確認問い合わせ対応体制の維持と名簿・リスト最終整理（続報）	自治体職員	○○付近（住所：枚方市北船橋町25、UTM座標：〇〇〇〇〇〇）の災害対策本部や問い合わせ窓口に、夜間も引き続き『避難所で家族に会えない』『避難所間で住民の移動があったが名簿に反映されていない』『新たに避難所に到着した住民の情報がある』などの問い合わせや情報提供が続いている。夜間体制下で名簿・安否確認リストの再照合と避難所間の情報共有が継続されている。	夜間のため避難所・自治体職員とも人員が限られており、名簿更新や問い合わせ対応に遅れが出ている。避難所間の移動住民については翌朝再点検予定。現場の立入は引き続き規制中。	標高11.3m前後、極めて緩やかな傾斜（0.6%）の低地で、淀川氾濫流が住宅地全体に波及しやすい。排水困難で高台や迂回路もなく孤立リスクが高い。	夜間の問い合わせ件数増加時における住民・家族対応、名簿・安否確認リスト・避難所情報の最終照合、避難所間の情報共有体制運用訓練。	夜間に避難所間移動や新規来所住民が発生し、名簿・安否確認リストの整合性確保が困難となる。夜間の人員・体制不足下での問い合わせ対応、避難所間の情報伝達・共有、住民・家族への説明体制が訓練ポイント。	問い合わせ窓口での丁寧な対応、名簿・安否確認リスト・避難所情報の再照合、避難所間の情報共有・連絡体制の確立、夜間の問い合わせ内容記録、名簿不一致時の追加確認・調整、住民・家族への状況説明、必要に応じて翌朝の再点検計画の策定。	夜間の人員・体制不足による対応遅延、名簿と安否確認リストの不一致・照合遅延、避難所間の情報共有不足、住民・家族の不安や混乱の拡大、問い合わせ件数の増加による記録・整理の遅延	3.0m前後の浸水が住宅1階全体・2階・屋根上避難が継続（24時間未満継続予想）	住宅被害（床上浸水・屋根上避難）・住民孤立・現場閉鎖後の住民・家族対応	住宅1階全体が長時間浸水し、住民は2階や屋根上に避難していた。救助・搬送・安否確認・撤収作業が全て完了し現場は閉鎖されたが、夜間になっても住民や家族からの安否や現場状況に関する問い合わせが続き、避難所間の移動や新規来所住民による名簿・安否確認リストの照合が必要。夜間の人員・体制不足が課題。	撤収後の問い合わせ窓口設置・運用、安否確認リスト・避難所情報の一元管理、現場立入規制の徹底、夜間も含めた名簿・リストの整合性確保、避難所間の情報共有体制強化、住民・家族への丁寧な説明体制、活動記録・問い合わせ記録の整備	平成30年7月豪雨（西日本豪雨）岡山県真備町等で、救助活動終息・現場閉鎖後も住民や家族からの問い合わせや避難所間の名簿不一致・情報共有不足が課題となった事例あり。	['現場閉鎖後の管理不備による安全リスク', '住民・家族への説明対応の遅延', '名簿・安否確認リストの整合性不備', '避難所間の情報共有不足']	['住民・家族の不安増大', '現場立入規制の徹底不足', '現場と本部間の情報伝達遅延']
		1-37	544.938	発災から184分	夜間の避難所・安否確認問い合わせ対応体制の維持と名簿・リスト最終整理（続報）	自治体職員	○○付近（住所：枚方市北船橋町25、UTM座標：〇〇〇〇〇〇）の災害対策本部や問い合わせ窓口に、夜間も引き続き『避難所で家族に会えない』『避難所間で住民の移動があったが名簿に反映されていない』『新たに避難所に到着した住民の情報がある』などの問い合わせや情報提供が続いている。夜間体制下で名簿・安否確認リストの再照合と避難所間の情報共有が継続されている。	夜間のため避難所・自治体職員とも人員が限られており、名簿更新や問い合わせ対応に遅れが出ている。避難所間の移動住民については翌朝再点検予定。現場の立入は引き続き規制中。	標高11.3m前後、極めて緩やかな傾斜（0.6%）の低地で、淀川氾濫流が住宅地全体に波及しやすい。排水困難で高台や迂回路もなく孤立リスクが高い。	夜間の問い合わせ件数増加時における住民・家族対応、名簿・安否確認リスト・避難所情報の最終照合、避難所間の情報共有体制運用訓練。	夜間に避難所間移動や新規来所住民が発生し、名簿・安否確認リストの整合性確保が困難となる。夜間の人員・体制不足下での問い合わせ対応、避難所間の情報伝達・共有、住民・家族への説明体制が訓練ポイント。	問い合わせ窓口での丁寧な対応、名簿・安否確認リスト・避難所情報の再照合、避難所間の情報共有・連絡体制の確立、夜間の問い合わせ内容記録、名簿不一致時の追加確認・調整、住民・家族への状況説明、必要に応じて翌朝の再点検計画の策定。	夜間の人員・体制不足による対応遅延、名簿と安否確認リストの不一致・照合遅延、避難所間の情報共有不足、住民・家族の不安や混乱の拡大、問い合わせ件数の増加による記録・整理の遅延	3.0m前後の浸水が住宅1階全体・2階・屋根上避難が継続（24時間未満継続予想）	住宅被害（床上浸水・屋根上避難）・住民孤立・現場閉鎖後の住民・家族対応	住宅1階全体が長時間浸水し、住民は2階や屋根上に避難していた。救助・搬送・安否確認・撤収作業が全て完了し現場は閉鎖されたが、夜間になっても住民や家族からの安否や現場状況に関する問い合わせが続き、避難所間の移動や新規来所住民による名簿・安否確認リストの照合が必要。夜間の人員・体制不足が課題。	撤収後の問い合わせ窓口設置・運用、安否確認リスト・避難所情報の一元管理、現場立入規制の徹底、夜間も含めた名簿・リストの整合性確保、避難所間の情報共有体制強化、住民・家族への丁寧な説明体制、活動記録・問い合わせ記録の整備	平成30年7月豪雨（西日本豪雨）岡山県真備町等で、救助活動終息・現場閉鎖後も住民や家族からの問い合わせや避難所間の名簿不一致・情報共有不足が課題となった事例あり。	['現場閉鎖後の管理不備による安全リスク', '住民・家族への説明対応の遅延', '名簿・安否確認リストの整合性不備', '避難所間の情報共有不足']	['住民・家族の不安増大', '現場立入規制の徹底不足', '現場と本部間の情報伝達遅延']

## Sheet: 枚方市楠葉朝日一丁目9
評価	備考	シナリオID	災害の中心からの距離[m]	イベント発生時刻	付与内容	情報源	状況付与内容	補足情報	地形情報や想定想定される被害の特徴	訓練効果・狙い	判断ポイント	期待される対応行動	想定される課題	水位状況	被害の種類	詳細な被害状況	想定される対策	類似の過去事例(あれば記載)	直近のリスク	二次的なリスク
		1-1	751.536	発災から5分	住宅地内歩道の冠水	住民	○○付近（住所：枚方市楠葉朝日一丁目9、UTM座標：〇〇〇〇〇〇）の歩道が水で覆われ始め、子どもや高齢者の通行が危険との通報。自宅前の歩道は5cm程度冠水しており、今後の水位上昇が心配です。	警察には連絡済み。道路名を聞かれた場合：「路線番号はわかりませんが、○○公園の近くの住宅街です。」	標高約12.8m、傾斜1.3%と緩やかな低地。淀川氾濫時には排水が間に合わず、住宅地の歩道や側溝から冠水が始まりやすい。住宅・通学路が多い。	住民への周知、安全確保、歩行者・通学児童の危険回避、現地状況の迅速な把握	淀川氾濫による低地部での歩道冠水。車道より一歩遅れて歩道に被害が出るタイミング。住宅地内での初動情報収集と住民目線での危険周知。	現地の冠水状況の確認、歩行者・児童の安全誘導や通行規制、通学路や生活道路の一時封鎖や迂回案内、住民・学校への情報発信、道路管理者・警察との連携。	歩行者・児童の転倒・感電リスク、通学・通勤時間帯での混乱、情報伝達の遅れ、冠水拡大時の迅速な対応	0.5m以上1.0m未満の冠水が歩道に発生	生活インフラ被害（歩道・通学路冠水）	住宅地内の歩道が冠水し、歩行者や児童の通行が危険となる。今後、車道や住宅敷地への浸水拡大の恐れもある。	歩道・側溝の排水確認、通行規制やバリケード設置、住民・学校への迅速な情報発信、必要に応じて避難指示や通学路変更、道路管理者・警察との連携。	平成30年7月豪雨時、淀川流域の住宅街で歩道・通学路の冠水や通行障害が発生。	['歩行者・児童の転倒・感電事故', '通学・通勤時の混乱や遅延']	['車道や住宅への冠水拡大', '救急・消防車両の通行障害', '地域の一時的孤立化']
		1-2	751.536	発災から6分	住宅地内道路の冠水拡大	住民	○○付近（住所：枚方市楠葉朝日一丁目9、UTM座標：〇〇〇〇〇〇）の住宅地道路で、冠水範囲が拡大し車道全体が水で覆われ始めたとの通報。『自宅前の道路は10cm以上冠水し、車の出入りや自転車の通行も危険な状況』との内容。	警察には連絡済み。消防にはまだ連絡していない。道路名を聞かれた場合：「路線番号はわかりませんが、○○公園の近くの住宅街のメイン道路です。」	標高約12.8m、傾斜1.3%のごく緩やかな低地。淀川氾濫流による排水能力を超えた冠水が住宅地道路に波及しやすい地形。周辺は住宅密集地で車道・歩道ともに浸水しやすい。	住民への浸水リスク再周知、車両・自転車の安全確保、現地状況の迅速な把握と初動対応の強化	歩道冠水から車道冠水への拡大。低地住宅街特有の排水困難区域で、住民の避難判断や道路規制判断の初動訓練。	現地冠水状況の即時確認、車両・自転車の通行規制やバリケード設置、住民・ドライバーへの情報発信、道路管理者・警察との連携、避難準備の再確認	車両の立ち往生・水没事故、通行規制遅延による二次被害、情報伝達の遅れ、夜間や悪天候時の安全確保	1.0m未満の冠水が車道全体に拡大中	交通インフラ・生活インフラ被害（車道冠水・通行障害）	住宅地内の車道が全面冠水し、車両や自転車の通行が危険・困難となる。今後は車両立ち往生や住宅敷地への浸水拡大リスクも高まる。	現地冠水状況の常時監視、迅速な通行規制・バリケード設置、住民・ドライバーへの情報発信、道路管理者・警察・消防との連携強化、必要に応じて避難指示や迂回路案内、排水路の詰まり除去	平成30年7月豪雨時、淀川流域の住宅地で車道冠水・車両立ち往生事例多数。	['車両・自転車の立ち往生や水没事故', '通行規制遅延による二次被害']	['住宅敷地への浸水拡大', '救急・消防車両の進入困難', '地域の一時的孤立化']
		1-3	751.536	発災から11分	住宅敷地・玄関先への浸水拡大と避難判断相談	住民	○○付近（住所：枚方市楠葉朝日一丁目9、UTM座標：〇〇〇〇〇〇）の自宅敷地内で、玄関先まで水が入り始めた。『家の前の道路や歩道はすでに冠水し、玄関先から水が流れ込み始めている。家族で避難すべきかどうか相談したい』との通報。	警察には連絡済み。消防にはまだ連絡していない。道路名を聞かれた場合：「路線番号はわかりませんが、○○公園の近くの住宅街のメイン道路です。」	標高約12.8m、傾斜1.3%のごく緩やかな低地。淀川氾濫流による排水能力を超えた冠水が住宅地道路から敷地・玄関先に波及しやすい地形。周辺は住宅密集地で、低地部特有の排水困難区域。	住民の避難判断・初動避難行動の訓練、浸水拡大時の住民支援・情報発信、行政・消防・警察の連携強化	歩道・車道冠水から敷地・玄関先への浸水段階へ進行。住民が早期に避難判断を下せるか、避難支援・情報提供体制が機能するかが訓練のポイント。	現地の浸水状況の即時確認、住民への避難勧告または指示の発令、要配慮者リストの確認と個別支援、消防・警察・自治体の連携による避難誘導、避難所の案内と開設準備、危険区域のバリケード設置や立入制限、現場情報の継続収集	住民の避難判断の遅れ、高齢者・要配慮者の避難支援の手薄化、床下・床上浸水への急速な進行、現場巡回や安否確認の遅延	1.0m以上1.5m未満の浸水が敷地・玄関先まで拡大	生活インフラ・住宅被害（敷地・玄関先浸水）	住宅敷地や玄関先まで水が流入し、今後床下・床上浸水に進行するリスクが高まっている。住民の避難判断が遅れると人的被害や孤立リスクも増大。家財や車両への被害、電気設備の浸水リスクも顕在化。	住民への早期避難勧告・指示、避難所の迅速な開設・案内、要支援者リストの活用による個別支援、現場巡回とバリケード設置、排水路の詰まり除去、消防・警察・自治体の連携強化	平成30年7月豪雨（西日本豪雨）で淀川流域の住宅地にて同様の敷地・玄関先への浸水拡大事例多数。	['住宅への床下・床上浸水進行', '住民の避難遅延による人的被害', '電気設備・車両の浸水による感電・損傷']	['地域の一時的孤立化', '高齢者・要支援者の避難困難', '浸水拡大による救急・消防車両の進入困難']
		1-4	751.536	発災から16分	住宅1階床下への浸水と避難判断の再相談	住民	○○付近（住所：枚方市楠葉朝日一丁目9、UTM座標：〇〇〇〇〇〇）の自宅で、1階床下まで水が入り始めた。『家族で2階に荷物を運びつつ、避難すべきか再度相談したい。近所の家も同様に水が入ってきている様子』との通報。	消防にも連絡済み。道路名を聞かれた場合：「路線番号はわかりませんが、○○公園の近くの住宅街です。」	標高約12.8m、傾斜1.3%のごく緩やかな低地。淀川氾濫流による排水能力を超えた冠水が住宅地道路から敷地・玄関先、床下へと波及しやすい地形。住宅密集地で排水困難区域。	住民への床下浸水リスク再周知、避難勧告・指示の発令判断、要配慮者支援・安否確認、消防・警察・自治体の連携強化	歩道・車道・敷地への浸水から住宅1階床下への進行段階。住民の避難判断遅延や孤立リスクの顕在化、現場での安否確認・避難支援体制の実効性が訓練の主眼。	現地の床下浸水状況の即時確認、避難勧告または指示の発令、要配慮者リストの確認と個別支援、消防・警察・自治体の連携による避難誘導、避難所の案内と開設準備、危険区域のバリケード設置や立入制限、現場情報の継続収集	住民の避難判断の遅れ、高齢者・要配慮者の避難支援の手薄化、床上浸水への急速な進行、現場巡回や安否確認の遅延、救助隊の到着遅延	1.5m以上2.0m未満の浸水が1階床下に到達	住宅被害（床下浸水）・避難判断遅延	住宅1階床下まで水が入り始め、家財・電気設備への被害が発生。住民の避難判断が遅れれば、床上浸水や孤立リスクが急速に高まる。要配慮者や高齢者の避難支援が急務。	住民への早期避難勧告・指示、要支援者リストによる個別支援、現場巡回と安否確認、消防・警察・自治体の連携による救助・避難体制の強化、危険区域のバリケード設置、避難所の早期開設	平成30年7月豪雨（西日本豪雨）で淀川流域の住宅地にて同様の床下浸水拡大・避難遅延事例多数。岡山県真備町等で避難判断遅れによる被害拡大事例あり。	['住宅の床上浸水進行', '住民の孤立・避難遅延による人的被害', '電気設備・車両の浸水による感電・損傷']	['地域の一時的孤立化', '高齢者・要支援者の避難困難', '浸水拡大による救急・消防車両の進入困難']
		1-5	751.536	発災から23分	住宅1階床上への浸水と住民からの救助要請	住民	○○付近（住所：枚方市楠葉朝日一丁目9、UTM座標：〇〇〇〇〇〇）の自宅で、1階の床上まで水が上がり始め、家族全員が2階へ避難した。周囲の道路は既に水没しており、外への避難ができない状況。高齢の家族もおり、救助を要請したい。	消防・警察にはすでに連絡済み。道路名を聞かれた場合：「路線番号はわかりませんが、○○公園近くの住宅地です。」	標高約12.8m、傾斜1.3%のごく緩やかな低地。淀川氾濫流による排水能力を超えた冠水が住宅地道路から敷地・玄関先、床下・床上へと波及しやすい地形。住宅密集地で排水困難区域。	床上浸水・住民孤立時の救助要請対応、垂直避難・救助判断訓練、現場情報の即時把握と優先順位付け	床下浸水から床上浸水へ進行し、住民が自力避難困難な孤立状態。現場からの救助要請対応や救助手段（ボート・ヘリ等）の選定、要配慮者支援の優先順位判断が訓練ポイント。	現地の床上浸水・孤立状況の即時確認、住民への安否確認と救助計画の立案、消防・警察・自治体による救助隊派遣、ボートやヘリ等の救助手段の検討、避難所の案内と受入準備、要支援者リストによる優先支援、危険区域の立入制限と周辺住民への情報発信。	救助隊の現場到着遅延、浸水範囲拡大による救助困難化、夜間・悪天候時の救助活動の危険、孤立住民の健康悪化やパニック、救助要請の優先順位付けの難しさ、通信手段の途絶	2.0m以上2.5m未満の浸水が住宅1階床上に到達	住宅被害（床上浸水）・住民孤立	住宅1階まで水が上がり、住民は2階や屋根などに垂直避難。周囲の道路や敷地は完全に水没し、外部への避難・救助が困難。高齢者や要配慮者がいる場合は生命の危険も高まる。	早期の避難指示・勧告、要支援者リストによる個別支援、現場巡回と安否確認、ボート・ヘリ等の救助手段の事前準備、電気・ガスの遮断、危険区域の立入制限、避難所の早期開設と受入体制強化	平成30年7月豪雨（西日本豪雨）で淀川流域の低地住宅地にて同様の床上浸水・孤立事例多数。岡山県真備町や広島県三原市などで救助活動が難航した記録あり。	['住宅の床上浸水による住民の孤立・生命危険', '高齢者・要配慮者の健康悪化', '電気設備の浸水による感電・火災']	['地域の長期的孤立化', '感染症・衛生環境の悪化', '救助活動中の二次災害（流れの強い水中での事故）']
		1-6	751.536	発災から28分	2階・屋根上避難住民からの救助要請（健康悪化者あり）	住民	○○付近（住所：枚方市楠葉朝日一丁目9、UTM座標：〇〇〇〇〇〇）の自宅で、1階が完全に水没し、家族4人が2階および屋根の上で救助を待っている。高齢の家族1名が体調不良を訴えている。周囲は水流が速く、地上からの避難は不可能。	消防・警察には既に通報済み。道路名を聞かれた場合：「路線番号はわかりませんが、○○公園近くの住宅地です。」	標高約12.8m、傾斜1.3%のごく緩やかな低地。淀川氾濫流による排水能力を超えた冠水が住宅地全体に波及しやすく、道路・敷地の水没と孤立化リスクが高い。高台や迂回路がなく、地域全体が浸水域に取り残されやすい。	屋根上・2階避難住民からの救助要請への即応、要配慮者（健康悪化者）への優先対応判断、現場状況の即時把握と救助手段（ボート・ヘリ等）の選定訓練	床上浸水・屋根上避難が発生し、住民からの直接救助要請がある段階。救助要請の優先順位や救助手段の判断、多様な関係機関との連携が訓練ポイント。特に体調不良者がいる場合の優先順位付け。	現地の屋根上・2階避難・孤立状況の即時把握、住民への安否確認と救助計画の立案、ボートやヘリ等の救助手段の準備・出動判断、体調不良者への優先救助、要配慮者リストによる優先支援、避難所の受入体制強化、危険区域の立入制限、関係機関との連携強化。	救助隊の現場到着遅延、屋根上避難者の健康悪化やパニック、浸水範囲拡大による救助活動困難化、夜間・悪天候時の救助活動の危険、通信手段の途絶、救助要請の優先順位付けの難しさ、体調不良者の緊急対応	2.5m以上3.0m未満の浸水が住宅1階全体に拡大、2階・屋根上避難が必要な状況（24時間以上継続予想）	住宅被害（床上浸水・屋根上避難）・住民孤立・救助要請	住宅1階が完全に浸水し、住民は2階や屋根上に避難。周囲の道路や敷地は完全に水没し、外部への避難・救助が困難。高齢者を含む住民から直接救助要請が発生し、体調不良者もおり、迅速な対応が求められる。	早期の避難指示・勧告、要支援者リストによる個別支援、現場巡回と安否確認、ボート・ヘリ等の救助手段の事前準備と迅速な出動、体調不良者の優先救助、電気・ガスの遮断、危険区域の立入制限、避難所の受入体制強化、関係機関との情報共有	平成30年7月豪雨（西日本豪雨）で淀川流域の低地住宅地にて同様の床上浸水・屋根上避難・孤立事例多数。岡山県真備町や広島県三原市などで救助活動が難航した記録あり。	['住宅の床上浸水による住民の孤立・生命危険', '屋根上避難者の健康悪化・転落リスク', '体調不良者の容体急変', '電気設備の浸水による感電・火災']	['地域の長期的孤立化', '感染症・衛生環境の悪化', '救助活動中の二次災害（流れの強い水中での事故）']
		1-7	751.536	発災から35分	屋根上・2階避難住民の救助要請続報（高齢者容体悪化）	消防	○○付近（住所：枚方市楠葉朝日一丁目9、UTM座標：〇〇〇〇〇〇）の住宅地で、2階および屋根上に避難している住民のうち、体調不良を訴えていた高齢者1名が意識を失ったとの現場消防隊からの報告。現地は水流が依然として強く、地上からの救助は困難。ボートによる救助準備を進めているが、ヘリによる救助要請も検討が必要と判断。	現地周辺から複数の救助要請が継続して入っており、警察・自治体とも情報共有済み。道路名を聞かれた場合：「路線番号はわかりませんが、○○公園近くの住宅地です。」	標高約12.8m、傾斜1.3%のごく緩やかな低地。淀川氾濫流による排水能力を超えた冠水が住宅地全体に波及しやすく、道路・敷地の水没と孤立化リスクが高い。高台や迂回路がなく、地域全体が浸水域に取り残されやすい。	体調急変者への最優先救助判断、複数要救助者への救助手段（ボート・ヘリ等）の迅速な選定、関係機関連携の即時強化、優先順位付け訓練	屋根上・2階避難住民の中から容体急変者が発生し、迅速な救助が必要となる段階。救助優先順位の再検討や、救助手段の多様化（ヘリ要請含む）が訓練のポイント。現場消防・警察・自治体・自衛隊等との連携・情報共有の即時性が問われる。	現場からの詳細な健康状態・人数把握、要配慮者（高齢者・体調不良者）の優先救助計画立案、ボート・ヘリ等の救助手段の迅速な準備・出動判断、住民・関係機関への情報発信、避難所の受入体制強化、危険区域の立入制限、関係機関（警察・消防・自衛隊・自治体）との連携強化	救助隊の現場到着遅延、要救助者の健康状態急変・生命危険、屋根上避難者のパニックや転落リスク、救助要請の優先順位付けの難しさ、通信手段の途絶、救助活動中の二次災害（強い流れによる事故や救助者の安全確保）	3.0m前後の浸水が住宅1階全体、2階・屋根上避難が継続	住宅被害（床上浸水・屋根上避難）・住民孤立・要配慮者健康悪化	住宅1階が完全に浸水し、住民は2階や屋根上に避難。体調急変者が発生し、迅速な救助が必要。周囲の道路や敷地は完全に水没し、地上からの救助は非常に困難。複数世帯で救助要請が続発している。	早期の避難指示・勧告、要支援者リストによる個別支援、現場巡回と安否確認、ボート・ヘリ等の救助手段の迅速な出動、要配慮者の優先救助、電気・ガスの遮断、危険区域の立入制限、避難所の受入体制強化、関係機関との情報共有	平成30年7月豪雨（西日本豪雨）で淀川流域の低地住宅地にて同様の床上浸水・屋根上避難・孤立事例多数。岡山県真備町や広島県三原市などで救助活動が難航した記録あり。	['住宅の床上浸水による住民の孤立・生命危険', '体調急変者の生命リスク', '屋根上避難者の健康悪化・転落リスク', '電気設備の浸水による感電・火災']	['地域の長期的孤立化', '感染症・衛生環境の悪化', '救助活動中の二次災害（流れの強い水中での事故）']
		1-8	751.536	発災から36分	屋根上・2階避難住民の救助活動本格化と現場安全確保要請	消防	○○付近（住所：枚方市楠葉朝日一丁目9、UTM座標：〇〇〇〇〇〇）の住宅地で、屋根上や2階に避難している住民の救助活動を現地消防隊が開始。水流が強く、救助ボートの進入時に流木や瓦礫が多く確認されている。複数の住民が手を振って救助を求めているが、一部住民は移動困難な状況。	現場隊員からの追加要請で、警察による周辺道路の立入規制と、追加の救助ボート・人員の派遣が必要。道路名を聞かれた場合：「路線番号は不明ですが、○○公園近くの住宅地です」。	標高約12.8m、傾斜1.3%のごく緩やかな低地。淀川氾濫流による排水能力を超えた冠水が住宅地全体に波及しやすく、道路・敷地の水没と孤立化リスクが高い。高台や迂回路がなく、地域全体が浸水域に取り残されやすい。	現場安全管理と救助活動の両立、複数要救助者への優先順位判断、関係機関連携訓練、現場状況変化への即応力強化	屋根上・2階避難住民救助の本格化段階。流木・瓦礫等による救助活動の危険性増大、現場安全確保のための警察・消防・自治体の連携、追加資機材・人員要請判断が訓練ポイント。	現場の安全確保（流木・瓦礫除去、立入規制）、救助活動の継続・優先順位付け、追加ボート・人員の派遣、住民への状況説明と安心確保、要配慮者の優先救助、関係機関（警察・消防・自衛隊・自治体）との連携強化。	救助活動中の二次災害（流木衝突・転落事故）、救助隊員の安全確保、現場への追加資機材・人員到着の遅延、住民の不安増大、救助要請の優先順位付けの難しさ、通信手段の途絶	3.0m以上5.0m未満の浸水が住宅1階全体・屋根上に継続（24時間以上72時間未満継続予想）	住宅被害（床上浸水・屋根上避難）・住民孤立・救助活動中の現場安全リスク	住宅1階全体が浸水し、住民は2階や屋根上に避難。複数世帯で救助要請が続発。現場は流木や瓦礫の漂流が多く、救助ボートの進入時に衝突・転覆等の危険が高まっている。住民の中には体調不良や移動困難者も含まれ、救助活動の優先順位付けと現場安全管理が重要。	早期避難指示・勧告、要支援者リストによる個別支援、現場安全確保（立入規制・流木除去）、追加資機材・人員の迅速派遣、ボート・ヘリ等の救助手段の多様化、危険区域の立入制限、避難所の受入体制強化、関係機関との情報共有・連携	平成30年7月豪雨（西日本豪雨）で淀川流域の低地住宅地にて同様の床上浸水・屋根上避難・孤立事例多数。岡山県真備町等で救助活動中の流木衝突事故や現場隊員の安全確保が課題となった。	['住宅の床上浸水による住民の孤立・生命危険', '流木・瓦礫による救助活動中の隊員・住民の負傷', '屋根上避難者の健康悪化・転落リスク', '電気設備の浸水による感電・火災']	['地域の長期的孤立化', '感染症・衛生環境の悪化', '救助活動中の二次災害（流れの強い水中での事故・資機材損壊）']
		1-9	751.536	発災から44分	救助活動中の現場指揮再調整・追加救助隊要請	消防	○○付近（住所：枚方市楠葉朝日一丁目9、UTM座標：〇〇〇〇〇〇）の住宅地で、屋根上や2階に避難している住民への救助活動を続行中。現場では流木や瓦礫の増加により、進入していた救助ボートの一部が一時的に活動を中断せざるを得ない状況となった。現場指揮隊より『安全確保のため一部隊を一時退避させ、追加の救助ボート・資機材・人員の派遣を要請したい』との連絡。	現場では複数の住民が依然として屋根上・2階で救助を待っている。周辺道路は全域冠水し、陸路での接近は困難。道路名を聞かれた場合：「路線番号は不明ですが、○○公園近くの住宅地です」。	標高約12.8m、傾斜1.3%のごく緩やかな低地。淀川氾濫流による排水能力を超えた冠水が住宅地全体に波及しやすく、道路・敷地の水没と孤立化リスクが高い。高台や迂回路がなく、地域全体が浸水域に取り残されやすい。	救助活動中の現場指揮再調整、追加資機材・人員要請判断、現場の安全確保と継続的救助活動の両立訓練	流木・瓦礫の増加により救助活動の危険性がさらに高まった状況で、現場指揮系統の再調整や追加救助隊派遣の判断が訓練ポイント。現場安全確保と住民救助のバランスが問われる。	現場の安全状況再評価、救助活動の一時中断・再開判断、追加救助隊・資機材の派遣要請、現場指揮系統の明確化、住民・関係機関への情報共有、救助要請住民の優先順位付け、警察・自衛隊等との連携強化	救助活動中の二次災害（流木衝突・転覆事故）リスク増大、現場隊員・住民の安全確保、追加資機材・人員到着の遅延、現場混乱・指揮系統の乱れ、住民の不安増大、通信手段の一時途絶	3.0m以上5.0m未満の浸水が住宅1階全体・屋根上に継続（24時間以上72時間未満継続予想）	住宅被害（床上浸水・屋根上避難）・住民孤立・救助活動中の現場安全リスク・救助活動遅延	住宅1階全体が浸水し、住民は2階や屋根上に避難。救助活動中に流木・瓦礫の増加で救助隊の安全確保が困難となり、一部活動を中断。追加の救助隊・資機材が必要な状況。住民の中には体調不良や移動困難者も含まれる。	現場安全確保（立入規制・流木除去）、追加資機材・人員の迅速派遣、現場指揮系統の明確化、ボート・ヘリ等の救助手段の多様化、住民への状況説明と安心確保、危険区域の立入制限、関係機関との情報共有・連携	平成30年7月豪雨（西日本豪雨）で淀川流域の低地住宅地にて同様の床上浸水・屋根上避難・孤立事例多数。岡山県真備町等で救助活動中の流木衝突事故や現場隊員の安全確保が課題となった。	['住宅の床上浸水による住民の孤立・生命危険', '流木・瓦礫による救助活動中の隊員・住民の負傷', '屋根上避難者の健康悪化・転落リスク', '救助活動の一時中断・遅延']	['地域の長期的孤立化', '感染症・衛生環境の悪化', '救助活動中の二次災害（流れの強い水中での事故・資機材損壊）']
		1-10	751.536	発災から46分	救助活動の一時中断と現場安全再評価	消防	○○付近（住所：枚方市楠葉朝日一丁目9、UTM座標：〇〇〇〇〇〇）の住宅地で、屋根上や2階に避難している住民への救助活動中、現場指揮隊より『流木や瓦礫の増加、水流の激化により救助ボートの追加出動が危険と判断し、一時的に活動を中断。現場の安全状況を再評価し、必要に応じて追加の救助隊・資機材の派遣を要請したい』との連絡。	現場では複数の住民が依然として屋根上・2階で救助を待っている。警察・自治体には既に情報共有済み。道路名を聞かれた場合：「路線番号は不明ですが、○○公園近くの住宅地です」。	標高約12.8m、傾斜1.3%のごく緩やかな低地。淀川氾濫流による排水能力を超えた冠水が住宅地全体に波及しやすく、道路・敷地の水没と孤立化リスクが高い。高台や迂回路がなく、地域全体が浸水域に取り残されやすい。	救助活動中の現場安全再評価、追加資機材・人員要請判断、現場の安全確保と継続的救助活動の両立訓練	救助活動中の二次災害リスクを受け、現場指揮隊が安全を最優先して一時活動を中断。現場安全確保と住民救助のバランス、追加救助隊派遣の判断が訓練ポイント。	現場の安全状況再評価、救助活動の一時中断・再開判断、追加救助隊・資機材の派遣要請、現場指揮系統の明確化、住民・関係機関への情報共有、救助要請住民の優先順位付け、警察・自衛隊等との連携強化。	救助活動中の二次災害リスク増大、現場隊員・住民の安全確保、追加資機材・人員到着の遅延、現場混乱・指揮系統の乱れ、住民の不安増大、通信手段の一時途絶	3.0m以上5.0m未満の浸水が住宅1階全体・屋根上に継続（24時間以上72時間未満継続予想）	住宅被害（床上浸水・屋根上避難）・住民孤立・救助活動遅延	住宅1階全体が浸水し、住民は2階や屋根上に避難。救助活動中に流木・瓦礫の増加で救助隊の安全確保が困難となり、一部活動を中断。追加の救助隊・資機材が必要な状況。住民の中には体調不良や移動困難者も含まれる。	現場安全確保（立入規制・流木除去）、追加資機材・人員の迅速派遣、現場指揮系統の明確化、ボート・ヘリ等の救助手段の多様化、住民への状況説明と安心確保、危険区域の立入制限、関係機関との情報共有・連携	平成30年7月豪雨（西日本豪雨）で淀川流域の低地住宅地にて同様の床上浸水・屋根上避難・孤立事例多数。岡山県真備町等で救助活動中の流木衝突事故や現場隊員の安全確保が課題となった。	['住宅の床上浸水による住民の孤立・生命危険', '流木・瓦礫による救助活動中の隊員・住民の負傷', '屋根上避難者の健康悪化・転落リスク', '救助活動の一時中断・遅延']	['地域の長期的孤立化', '感染症・衛生環境の悪化', '救助活動中の二次災害（流れの強い水中での事故・資機材損壊）']
		1-11	751.536	発災から54分	追加救助隊・資機材要請および現場指揮本部の設置準備	消防	○○付近（住所：枚方市楠葉朝日一丁目9、UTM座標：〇〇〇〇〇〇）の住宅地にて、現場指揮隊から『救助活動の再開にあたり、追加の救助ボート・救命胴衣・救助用ロープなど資機材の派遣と、現場に臨時指揮本部を設置したい』との要請。現場は依然として流木・瓦礫の漂流が多く、屋根上や2階で救助を待つ住民が複数名確認されている。	現場は流木・瓦礫の漂流が多く、追加の救助隊・資機材が到着するまで救助活動は一部制限。警察・自治体・自衛隊との連携も必要。道路名を聞かれた場合：「路線番号は不明ですが、○○公園近くの住宅地です」。	標高約12.8m、傾斜1.3%のごく緩やかな低地。淀川氾濫流による排水能力を超えた冠水が住宅地全体に波及しやすく、道路・敷地の水没と孤立化リスクが高い。高台や迂回路がなく、地域全体が浸水域に取り残されやすい。	現場指揮本部の設置による指揮・調整体制強化、追加資機材・人員要請判断、現場安全確保と住民救助の両立訓練	現場安全再評価後、追加資機材・人員要請と現場指揮本部設置による指揮命令系統の強化。関係機関連携・現場状況変化への即応力強化が訓練ポイント。	現場指揮本部の設置と指揮系統の明確化、追加救助隊・資機材の迅速な派遣要請、現場安全状況の継続的評価、住民・関係機関への情報共有、救助要請住民の優先順位付け、警察・自衛隊等との連携強化。	追加資機材・人員到着までの救助活動制限、現場指揮系統の混乱防止、関係機関連携の遅れ、住民・隊員の安全確保、通信手段の維持	3.0m以上5.0m未満の浸水が住宅1階全体・屋根上に継続（24時間以上72時間未満継続予想）	住宅被害（床上浸水・屋根上避難）・住民孤立・救助活動再開準備	住宅1階全体が浸水し、住民は2階や屋根上に避難。救助活動は現場安全確保のため一時中断中だが、追加救助隊・資機材の到着と現場指揮本部設置により、救助活動再開の準備が進められている。住民の中には体調不良や移動困難者も含まれる。	現場安全確保（立入規制・流木除去）、追加資機材・人員の迅速派遣、現場指揮本部設置による指揮系統強化、救助手段の多様化、住民への状況説明と安心確保、危険区域の立入制限、関係機関との情報共有・連携	平成30年7月豪雨（西日本豪雨）で淀川流域の低地住宅地にて同様の床上浸水・屋根上避難・孤立事例多数。岡山県真備町等で救助活動中の流木衝突事故や現場隊員の安全確保が課題となった。	['住宅の床上浸水による住民の孤立・生命危険', '流木・瓦礫による救助活動中の隊員・住民の負傷', '屋根上避難者の健康悪化・転落リスク', '救助活動の一時中断・遅延']	['地域の長期的孤立化', '感染症・衛生環境の悪化', '救助活動中のさらなる二次災害（流れの強い水中での事故・資機材損壊）']
		1-12	751.536	発災から56分	救助活動再開と住民への現場状況説明・安心確保	消防	○○付近（住所：枚方市楠葉朝日一丁目9、UTM座標：〇〇〇〇〇〇）の住宅地で、追加の救助ボートや救助用資機材が到着し、現場指揮本部の指示のもとで救助活動が再開された。現場では複数の住民が屋根上や2階で救助を待機しており、現場隊員が住民に現状や今後の救助方針について説明・声掛けを実施中。	現場は流木や瓦礫の漂流が続き、救助活動は安全確認を徹底しながら段階的に再開。警察・自衛隊とも連携中。道路名を聞かれた場合：「路線番号は不明ですが、○○公園近くの住宅地です」。	標高約12.8m、傾斜1.3%のごく緩やかな低地。淀川氾濫流による排水能力を超えた冠水が住宅地全体に波及しやすく、道路・敷地の水没と孤立化リスクが高い。高台や迂回路がなく、地域全体が浸水域に取り残されやすい。	現場指揮本部主導による救助活動再開、住民への状況説明・安心確保、関係機関との連携強化訓練	現場安全対策を講じたうえでの救助活動再開段階。追加資機材・人員投入後、指揮命令系統のもとで住民救助を効率的に進める。住民への状況説明や安心確保のコミュニケーションも重視。	現場指揮本部の指示に基づく救助活動の再開、住民への状況説明・声掛け、要配慮者の優先救助、現場安全確認の継続、関係機関（警察・自衛隊・自治体）との連携強化、救助活動の進捗報告。	流木・瓦礫による救助活動の危険、住民の不安増大、追加資機材の運用調整、現場指揮系統の混乱防止、通信手段維持の困難	3.0m以上5.0m未満の浸水が住宅1階全体・屋根上に継続（24時間以上72時間未満継続予想）	住宅被害（床上浸水・屋根上避難）・住民孤立・救助活動再開	住宅1階全体が浸水し、住民は2階や屋根上に避難。現場指揮本部の設置・追加資機材の到着により、救助活動が再開。住民の中には体調不良や移動困難者も含まれ、現場では住民への状況説明や安心確保のための声掛けが行われている。	現場安全確保（立入規制・流木除去）、追加資機材・人員の迅速運用、現場指揮本部による指揮系統強化、住民への状況説明・安心確保、要配慮者の優先救助、危険区域の立入制限、関係機関との情報共有・連携	平成30年7月豪雨（西日本豪雨）で淀川流域の低地住宅地にて同様の床上浸水・屋根上避難・孤立事例多数。岡山県真備町等で救助活動再開時の現場安全管理や住民対応が課題となった。	['住宅の床上浸水による住民の孤立・生命危険', '流木・瓦礫による救助活動中の隊員・住民の負傷', '屋根上避難者の健康悪化・転落リスク', '救助活動中の現場混乱・指揮系統の乱れ']	['地域の長期的孤立化', '感染症・衛生環境の悪化', '救助活動中のさらなる二次災害（流れの強い水中での事故・資機材損壊）']
		1-13	751.536	発災から61分	救助住民の一時収容・現場応急医療対応の開始	消防	○○付近（住所：枚方市楠葉朝日一丁目9、UTM座標：〇〇〇〇〇〇）で、救助活動により屋根上・2階から救出された住民の一部が現場救護所に一時収容されている。複数の住民が低体温や脱水症状を訴えており、現場応急手当班が対応中。	救助住民には高齢者や持病を持つ方が複数名含まれる。警察・自衛隊・医療機関とも情報共有済み。道路名を聞かれた場合：「路線番号は不明ですが、○○公園近くの住宅地です」。	標高約12.8m、傾斜1.3%のごく緩やかな低地。淀川氾濫流による排水能力を超えた冠水が住宅地全体に波及しやすく、道路・敷地の水没と孤立化リスクが高い。高台や迂回路がなく、地域全体が浸水域に取り残されやすい。	救助活動後の住民ケア、現場応急医療体制の訓練、要配慮者の健康管理・医療搬送判断、関係機関連携の強化	救助活動再開後の住民救出・応急医療対応段階。高齢者や持病持ちの住民への現場医療対応、搬送判断、現場医療班・関係機関連携が訓練ポイント。	救助住民の健康状態確認、現場応急手当（低体温・脱水・持病悪化対応）、医療機関搬送の要否判断、追加医療資機材要請、住民への状況説明・安心確保、警察・自衛隊・医療機関との連携、救助活動記録・報告	救助住民の体調悪化や搬送遅延、現場医療資機材の不足、救助活動中の安全確保、住民のパニックや不安拡大、通信手段の維持、関係機関連携の遅れ	3.0m以上5.0m未満の浸水が住宅1階全体・屋根上に継続（24時間以上72時間未満継続予想）	住宅被害（床上浸水・屋根上避難）・住民孤立・救助活動・応急医療対応	住宅1階全体が浸水し、住民は2階や屋根上に避難していたが、救助活動再開により順次救出。長時間の孤立や浸水による低体温症・脱水・持病悪化等が複数発生し、現場で応急手当や医療搬送判断が必要となっている。	早期避難指示・勧告、要支援者リストによる個別支援、現場応急手当班の配置、医療機関との連携体制強化、救助活動中の安全管理、住民への状況説明・安心確保、関係機関との情報共有・連携	平成30年7月豪雨（西日本豪雨）岡山県真備町で床上浸水・屋根上避難・孤立住民の救助後、現場での応急手当や医療搬送が多数発生した事例あり。	['住宅の床上浸水による住民の孤立・生命危険', '救助住民の体調悪化・低体温症・持病の急変', '救助活動中の隊員・住民の負傷']	['感染症・衛生環境の悪化', '救助活動中のさらなる二次災害（流木衝突・感電等）', '医療搬送の遅延による健康被害']
		1-14	751.536	発災から68分	救助住民の医療機関搬送調整と家族・住民への安否説明	消防	○○付近（住所：枚方市楠葉朝日一丁目9、UTM座標：〇〇〇〇〇〇）の現場救護所で、救助された住民のうち体調不良や持病悪化が認められる複数名について、現場から医療機関への搬送調整が始まった。現場には家族や近隣住民が安否確認や搬送状況の説明を求めて集まりつつある。	搬送対象住民には高齢者・持病持ち・低体温症の方が含まれる。現場救護所から医療機関までの搬送ルート確保が課題。警察・自衛隊・医療機関と連携中。道路名を聞かれた場合：「路線番号は不明ですが、○○公園近くの住宅地です」。	標高約12.8m、傾斜1.3%のごく緩やかな低地。淀川氾濫流による排水能力を超えた冠水が住宅地全体に波及しやすく、道路・敷地の水没と孤立化リスクが高い。高台や迂回路がなく、地域全体が浸水域に取り残されやすい。	広域搬送体制の訓練、医療機関との連携、搬送優先順位判断、現場～搬送先間の情報伝達・調整、住民・家族への説明体制の確認	現場応急手当後の住民広域搬送段階。救助活動の終息に向けて、医療機関との連携・搬送ルート確保・搬送優先順位判断・現場～搬送先間の情報共有、住民・家族への説明体制強化が訓練のポイント。	搬送対象者の優先順位付け、救急車・ドクターヘリ等の搬送手段調整、搬送ルートの安全確認、現場から医療機関への情報連携、住民・家族への説明、搬送記録の作成、関係機関との連携強化。	搬送対象者多数による優先順位判断の難しさ、搬送ルートの冠水・障害物による遅延、救急車・ヘリの運用調整、医療機関の受入体制調整、住民・家族の不安増大、現場と搬送先間の情報伝達遅延	3.0m以上5.0m未満の浸水が住宅1階全体・屋根上に継続（24時間以上72時間未満継続予想）	住宅被害（床上浸水・屋根上避難）・住民孤立・救助活動・広域医療搬送	住宅1階全体が浸水し、住民は2階や屋根上に避難していたが、救助活動再開により順次救出。長時間の孤立や浸水による低体温症・脱水・持病悪化等が複数発生し、現場で応急手当や医療搬送判断が必要となっている。家族や近隣住民からの安否確認や搬送状況の問い合わせも増加している。	早期避難指示・勧告、要支援者リストによる個別支援、現場応急手当班・医療機関との連携体制強化、搬送ルートの事前確保・安全確認、搬送優先順位判断基準の整備、住民・家族への説明体制強化、関係機関との情報共有・連携	平成30年7月豪雨（西日本豪雨）岡山県真備町で床上浸水・屋根上避難・孤立住民の救助後、現場からの広域医療搬送が多数発生し、搬送ルートの冠水・渋滞・現場～搬送先間の連携が課題となった事例あり。	['住宅の床上浸水による住民の孤立・生命危険', '救助住民の体調悪化・低体温症・持病の急変', '救助活動中の隊員・住民の負傷']	['感染症・衛生環境の悪化', '救助活動中のさらなる二次災害（流木衝突・感電等）', '医療搬送の遅延による健康被害']
		1-15	751.536	発災から74分	救助活動終息に向けた現場撤収準備と最終安否確認	消防	○○付近（住所：枚方市楠葉朝日一丁目9、UTM座標：〇〇〇〇〇〇）の住宅地で、救助活動がほぼ完了し、現場指揮本部より『残る住民の最終安否確認と、救助隊・資機材の安全な撤収準備を開始する』との通達。現場では一部住民の所在確認が続いているが、多数の住民は既に搬送・避難済み。	安否不明住民の中には連絡が取れない方が数名含まれる。警察・自衛隊・医療機関と引き続き連携。道路名を聞かれた場合：「路線番号は不明ですが、○○公園近くの住宅地です」。	標高約12.8m、傾斜1.3%のごく緩やかな低地。淀川氾濫流による排水能力を超えた冠水が住宅地全体に波及しやすく、道路・敷地の水没と孤立化リスクが高い。高台や迂回路がなく、地域全体が浸水域に取り残されやすい。	救助活動終息段階での住民安否確認・行方不明者捜索、現場撤収判断、関係機関連携体制の確認訓練	救助活動の終息に伴い、全住民の安否確認・行方不明者捜索、現場隊員・資機材の安全な撤収を段階的に進める。現場指揮本部・関係機関の連携・情報共有が重要な訓練ポイント。	残る住民の安否確認、行方不明者の捜索・情報収集、現場資機材の撤収準備、関係機関との撤収調整、住民・家族への状況説明、撤収後の現場安全管理（立入規制等）、活動記録・報告作成。	安否不明住民の捜索難航、現場撤収中の安全確保、資機材損耗・紛失、住民・家族の不安増大、現場と本部間の情報伝達遅延	3.0m以上5.0m未満の浸水が住宅1階全体・屋根上に継続（24時間以上72時間未満継続予想）	住宅被害（床上浸水・屋根上避難）・住民孤立・救助活動終息・安否確認・現場撤収	住宅1階全体が長時間浸水し、住民は2階や屋根上に避難していた。救助活動・広域搬送がほぼ完了し、現場では安否不明住民の捜索と残留者の確認、撤収準備が進行中。現場の安全管理と情報共有が重要。	早期避難指示・勧告、要支援者リストによる個別支援、現場応急手当班・医療機関との連携体制強化、撤収時の安全管理、安否確認・行方不明者捜索の徹底、住民・家族への説明体制強化、関係機関との情報共有・連携	平成30年7月豪雨（西日本豪雨）岡山県真備町で床上浸水・屋根上避難・孤立住民の救助活動終息後、安否確認・撤収段階での捜索・情報共有・住民対応が重要課題となった事例あり。	['安否不明住民の生命危険', '撤収作業中の隊員・住民の安全リスク', '現場撤収遅延・資機材損耗']	['感染症・衛生環境の悪化', '住民・家族の不安増大', '現場と本部間の情報伝達遅延']
		1-16	751.536	発災から79分	現場撤収・活動記録整理と住民・家族への最終状況説明	消防	○○付近（住所：枚方市楠葉朝日一丁目9、UTM座標：〇〇〇〇〇〇）の住宅地で、救助活動・安否確認が完了し、現場指揮本部より『救助隊・資機材の撤収作業を本格開始。現場活動記録と住民・家族への最終状況説明を実施する』との通達。	撤収作業中も住民や家族から状況確認の問い合わせが続いている。警察・自衛隊・医療機関と連携し、最終的な住民名簿・安否リストを整理中。道路名を聞かれた場合：「路線番号は不明ですが、○○公園近くの住宅地です」。	標高約12.8m、傾斜1.3%のごく緩やかな低地。淀川氾濫流による排水能力を超えた冠水が住宅地全体に波及しやすく、道路・敷地の水没と孤立化リスクが高い。高台や迂回路がなく、地域全体が浸水域に取り残されやすい。	救助活動終息後の撤収・記録整理、住民・家族への説明体制、現場の安全管理・情報共有の確認訓練	救助活動が完全に終息し、撤収・記録整理・住民対応の最終段階。住民・家族への説明や現場安全管理、関係機関連携の確認が訓練ポイント。	撤収作業の安全管理、資機材の点検・整理、住民・家族への最終説明・状況報告、安否確認リストの確定・共有、現場の立入規制・安全措置、活動記録・報告書の作成、関係機関との最終調整。	撤収作業中の事故・負傷、資機材の紛失・損傷、住民・家族への説明対応の遅延、安否確認リストの整合性確保、現場と本部間の情報伝達遅延	3.0m以上5.0m未満の浸水が住宅1階全体・屋根上に継続（24時間以上72時間未満継続予想）	住宅被害（床上浸水・屋根上避難）・住民孤立・救助活動終息・撤収・記録整理	住宅1階全体が長時間浸水し、住民は2階や屋根上に避難していた。救助活動・広域搬送・安否確認が完了し、現場では資機材撤収・記録整理・住民対応が進行中。現場の安全管理と住民・家族への説明が中心課題。	撤収時の安全管理、活動記録の正確な作成、住民・家族への説明体制強化、安否確認リストの整合性確保、関係機関との情報共有・連携、現場の立入規制・安全措置	平成30年7月豪雨（西日本豪雨）岡山県真備町で床上浸水・屋根上避難・孤立住民の救助活動終息後、撤収・記録整理・住民対応が重要課題となった事例あり。	['撤収作業中の隊員・住民の安全リスク', '資機材の紛失・損傷', '住民・家族への説明対応の遅延']	['感染症・衛生環境の悪化', '住民・家族の不安増大', '現場と本部間の情報伝達遅延']
		1-17	751.536	発災から81分	現場撤収・活動報告書作成と住民・家族への最終説明対応	消防	○○付近（住所：枚方市楠葉朝日一丁目9、UTM座標：〇〇〇〇〇〇）の住宅地で、現場指揮本部より『救助活動・安否確認・資機材撤収が完了し、活動記録・安否確認リスト・資機材点検の最終整理、住民・家族への最終説明対応を実施する』との通達。	撤収作業・記録整理中も住民や家族から状況確認の問い合わせが継続。警察・自衛隊・医療機関と引き続き連携。道路名を聞かれた場合：「路線番号は不明ですが、○○公園近くの住宅地です」。	標高約12.8m、傾斜1.3%のごく緩やかな低地。淀川氾濫流による排水能力を超えた冠水が住宅地全体に波及しやすく、道路・敷地の水没と孤立化リスクが高い。高台や迂回路がなく、地域全体が浸水域に取り残されやすい。	救助活動終息後の撤収・記録整理・住民・家族への説明体制の確認訓練、活動報告書作成、関係機関連携の最終確認	現場活動がほぼ完了し、撤収に向けた最終調整・関係機関との引き継ぎ・住民説明・記録整理を実施する段階。現場管理や情報伝達の正確性、住民・家族への説明体制、関係機関連携の確認が訓練ポイント。	撤収作業の安全管理・最終点検、資機材の整理・搬出、活動記録・安否確認リストの確定・本部提出、警察・自衛隊・医療機関との撤収・現場管理の調整、住民・家族への最終説明・状況報告、現場立入規制の再確認、活動報告書の作成と本部への提出。	撤収作業中の事故・負傷、資機材の紛失・損傷、住民・家族への説明対応の遅延、安否確認リストや活動記録の整合性確保、関係機関との調整遅延、現場と本部間の情報伝達遅延	3.0m以上5.0m未満の浸水が住宅1階全体・屋根上に継続（24時間以上72時間未満継続予想）	住宅被害（床上浸水・屋根上避難）・住民孤立・救助活動終息・撤収・記録整理	住宅1階全体が長時間浸水し、住民は2階や屋根上に避難していた。救助活動・広域搬送・安否確認が完了し、現場では資機材撤収・記録整理・住民対応が進行中。現場の安全管理と住民・家族への説明が中心課題。	撤収時の安全管理、活動記録の正確な作成、住民・家族への説明体制強化、安否確認リストの整合性確保、関係機関との情報共有・連携、現場の立入規制・安全措置	平成30年7月豪雨（西日本豪雨）岡山県真備町で床上浸水・屋根上避難・孤立住民の救助活動終息後、撤収・記録整理・住民対応が重要課題となった事例あり。	['撤収作業中の隊員・住民の安全リスク', '資機材の紛失・損傷', '住民・家族への説明対応の遅延']	['感染症・衛生環境の悪化', '住民・家族の不安増大', '現場と本部間の情報伝達遅延']
		1-18	751.536	発災から86分	現場閉鎖・管理引継ぎと問い合わせ対応窓口の設置	消防	○○付近（住所：枚方市楠葉朝日一丁目9、UTM座標：〇〇〇〇〇〇）の住宅地にて、現場指揮本部より『全ての救助・安否確認・資機材撤収作業が完了し、現場は正式に閉鎖。今後は必要な関係機関への現場管理の引継ぎと、住民・家族への最終状況説明および問い合わせ対応を実施する』との通達。	現地では撤収後も住民や家族からの問い合わせが断続的に続いているため、問い合わせ窓口を設置。警察・自衛隊・医療機関と最終的な現場管理の引継ぎ調整を行う。道路名を聞かれた場合：「路線番号は不明ですが、○○公園近くの住宅地です」。	標高約12.8m、傾斜1.3%のごく緩やかな低地。淀川氾濫流による排水能力を超えた冠水が住宅地全体に波及しやすく、道路・敷地の水没と孤立化リスクが高い。高台や迂回路がなく、地域全体が浸水域に取り残されやすい。	救助・撤収作業の完全終息と現場閉鎖、現場管理の円滑な引継ぎ、住民・家族への最終説明体制の確認訓練	全作業完了後の現場閉鎖・管理引継ぎ。住民・家族への説明、問い合わせ対応、関係機関間の連携・情報共有の最終確認が訓練ポイント。	現場閉鎖の宣言、現場管理の関係機関（警察・自衛隊等）への正式な引継ぎ、問い合わせ窓口の設置・運用、住民・家族への最終状況説明、活動記録・報告書の本部提出、現場立入規制の維持。	現場閉鎖後の住民・家族からの問い合わせ対応遅延、現場管理引継ぎの不備、資機材や記録の紛失、現場立入規制の徹底不足、関係機関間の情報伝達の行き違い	3.0m以上5.0m未満の浸水が住宅1階全体・屋根上に継続（24時間以上72時間未満継続予想）	住宅被害（床上浸水・屋根上避難）・住民孤立・救助活動終息・撤収・現場閉鎖	住宅1階全体が長時間浸水し、住民は2階や屋根上に避難していた。救助・搬送・安否確認・撤収作業が全て完了し、現場は閉鎖。今後は現場管理の関係機関への引継ぎと住民・家族への最終説明が必要。	撤収時の安全管理、現場管理の正式な引継ぎ体制、住民・家族への説明体制強化、問い合わせ窓口の設置、活動記録の正確な提出、現場立入規制の徹底、関係機関との情報共有	平成30年7月豪雨（西日本豪雨）岡山県真備町で床上浸水・屋根上避難・孤立住民の救助活動終息後、現場閉鎖・管理引継ぎ・住民対応が重要課題となった事例あり。	['現場閉鎖後の管理不備による安全リスク', '住民・家族への説明対応の遅延', '現場立入規制の徹底不足']	['感染症・衛生環境の悪化', '住民・家族の不安増大', '現場と本部間の情報伝達遅延']
		1-19	751.536	発災から92分	現場閉鎖後の住民・家族からの追加問い合わせと最終対応	住民	○○付近（住所：枚方市楠葉朝日一丁目9、UTM座標：〇〇〇〇〇〇）に住む家族や親族から、『救助された家族の所在が分からない』『現場の安全状況や立入可能か教えてほしい』などの問い合わせが災害対策本部や現場管理窓口に寄せられている。	現場管理は消防から警察・自治体に引き継がれており、問い合わせ窓口は市役所災害対策本部で継続運用中。避難所や安否確認リストは本部で一元管理。現場の立入は規制中。	標高約12.8m、傾斜1.3%のごく緩やかな低地。淀川氾濫流による排水能力を超えた冠水が住宅地全体に波及しやすく、道路・敷地の水没と孤立化リスクが高い。高台や迂回路がなく、地域全体が浸水域に取り残されやすい。	現場閉鎖後の住民・家族対応、問い合わせ窓口運用訓練、安否確認リスト・避難所情報の一元管理・情報伝達体制の確認	救助・撤収作業が全て完了し現場閉鎖後、住民や家族から問い合わせが継続的に発生する状況を想定。問い合わせ窓口の設置・運用や、安否確認リスト・避難所情報の一元管理・情報伝達が訓練のポイント。	問い合わせ窓口での丁寧な対応、安否確認リストや避難所情報の確認・案内、現場立入規制や安全状況の説明、問い合わせ内容の記録、必要に応じて関係機関への連絡・調整。	問い合わせ件数の増加による対応遅延、情報伝達の行き違い、現場閉鎖後の立入希望者対応、安否確認リストの整合性維持、住民・家族の不安や混乱の拡大	3.0m以上5.0m未満の浸水が住宅1階全体・屋根上に継続（24時間以上72時間未満継続予想）	住宅被害（床上浸水・屋根上避難）・住民孤立・現場閉鎖後の住民対応	住宅1階全体が長時間浸水し、住民は2階や屋根上に避難していた。救助・搬送・安否確認・撤収作業が全て完了し現場は閉鎖されたが、住民や家族からの安否や現場状況に関する問い合わせが続いている。現場管理は関係機関へ引継ぎ済み。	撤収後の問い合わせ窓口設置・運用、安否確認リスト・避難所情報の一元管理、現場立入規制の徹底、住民・家族への丁寧な説明体制、関係機関との情報共有、活動記録・問い合わせ記録の整備	平成30年7月豪雨（西日本豪雨）岡山県真備町などで、救助活動終息・現場閉鎖後も住民や家族からの問い合わせが殺到し、安否確認・情報提供体制の整備が課題となった事例あり。	['現場閉鎖後の管理不備による安全リスク', '住民・家族への説明対応の遅延', '安否確認リストの整合性不備']	['住民・家族の不安増大', '現場立入規制の徹底不足', '現場と本部間の情報伝達遅延']
		1-20	751.536	発災から96分	現場閉鎖後の追加問い合わせおよび最終状況整理	自治体職員	○○付近（住所：枚方市楠葉朝日一丁目9、UTM座標：〇〇〇〇〇〇）の現場閉鎖後、災害対策本部や問い合わせ窓口に『救助された家族の安否や搬送先、避難所での所在が分からない』『現場の立入可能時期や安全状況を知りたい』といった問い合わせが継続的に寄せられている。安否確認リストや避難所名簿との照合・整理が必要な状況。	現場管理は既に消防から警察・自治体に引き継がれており、問い合わせ窓口は市役所災害対策本部で運用中。避難所や安否確認リストは本部で一元管理。現場の立入は引き続き規制中。避難所には新たな住民の追加来所情報もあり。	標高約12.8m、傾斜1.3%のごく緩やかな低地。淀川氾濫流による排水能力を超えた冠水が住宅地全体に波及しやすく、道路・敷地の水没と孤立化リスクが高い。高台や迂回路がなく、地域全体が浸水域に取り残されやすい。	現場閉鎖後の住民・家族対応、問い合わせ窓口体制の運用訓練、避難所名簿・安否確認リストの整合・再整理、住民・家族への説明体制強化	救助・撤収・現場閉鎖後も住民や家族からの問い合わせが継続。問い合わせ窓口の運用、名簿・安否確認リストの一元管理・整合性確保、住民・家族への説明・安心確保が訓練のポイント。	問い合わせ窓口での丁寧な対応、安否確認リストや避難所情報の照合・案内、現場立入規制や安全状況の説明、問い合わせ内容の記録、名簿不一致時の追加確認・調整、必要に応じて関係機関への連絡・調整。	問い合わせ件数の増加による対応遅延、名簿と安否確認リストの不一致・照合遅延、情報伝達の行き違い、現場閉鎖後の立入希望者対応、住民・家族の不安や混乱の拡大	3.0m以上5.0m未満の浸水が住宅1階全体・屋根上に継続（24時間以上72時間未満継続予想）	住宅被害（床上浸水・屋根上避難）・住民孤立・現場閉鎖後の住民・家族対応	住宅1階全体が長時間浸水し、住民は2階や屋根上に避難していた。救助・搬送・安否確認・撤収作業が全て完了し現場は閉鎖されたが、住民や家族からの安否や現場状況に関する問い合わせが続いている。避難所への新規来所住民もあり、名簿・安否確認リストの照合が必要。	撤収後の問い合わせ窓口設置・運用、安否確認リスト・避難所情報の一元管理、現場立入規制の徹底、住民・家族への丁寧な説明体制、名簿・リストの整合性確保、関係機関との情報共有、活動記録・問い合わせ記録の整備	平成30年7月豪雨（西日本豪雨）岡山県真備町などで、救助活動終息・現場閉鎖後も住民や家族からの問い合わせが殺到し、安否確認・情報提供体制の整備が課題となった事例あり。	['現場閉鎖後の管理不備による安全リスク', '住民・家族への説明対応の遅延', '名簿・安否確認リストの整合性不備']	['住民・家族の不安増大', '現場立入規制の徹底不足', '現場と本部間の情報伝達遅延']
		1-21	751.536	発災から101分	現場閉鎖後の安否確認リスト・避難所情報の再照合および問い合わせ対応	自治体職員	○○付近（住所：枚方市楠葉朝日一丁目9、UTM座標：〇〇〇〇〇〇）の現場閉鎖後、災害対策本部や問い合わせ窓口に『避難した家族の安否や居場所が分からない』『避難所で会えない』『現場の安全状況や立入可能時期を知りたい』といった問い合わせが複数件寄せられている。安否確認リストや避難所名簿との照合・再整理を進めている。	現場管理は消防から警察・自治体に引き継がれており、問い合わせ窓口は市役所災害対策本部で継続運用中。避難所や安否確認リストは本部で一元管理。現場の立入は引き続き規制中。避難所には新たな住民の追加来所情報もあり。	標高約12.8m、傾斜1.3%のごく緩やかな低地。淀川氾濫流による排水能力を超えた冠水が住宅地全体に波及しやすく、道路・敷地の水没と孤立化リスクが高い。高台や迂回路がなく、地域全体が浸水域に取り残されやすい。	現場閉鎖後の住民・家族対応、問い合わせ窓口体制の運用訓練、避難所名簿・安否確認リストの整合・再整理、住民・家族への説明体制強化	救助・撤収・現場閉鎖後も住民や家族からの問い合わせが継続。問い合わせ窓口の運用、名簿・安否確認リストの一元管理・整合性確保、住民・家族への説明・安心確保が訓練のポイント。	問い合わせ窓口での丁寧な対応、安否確認リストや避難所情報の照合・案内、現場立入規制や安全状況の説明、問い合わせ内容の記録、名簿不一致時の追加確認・調整、必要に応じて関係機関への連絡・調整。	問い合わせ件数の増加による対応遅延、名簿と安否確認リストの不一致・照合遅延、情報伝達の行き違い、現場閉鎖後の立入希望者対応、住民・家族の不安や混乱の拡大	3.0m以上5.0m未満の浸水が住宅1階全体・屋根上に継続（24時間以上72時間未満継続予想）	住宅被害（床上浸水・屋根上避難）・住民孤立・現場閉鎖後の住民・家族対応	住宅1階全体が長時間浸水し、住民は2階や屋根上に避難していた。救助・搬送・安否確認・撤収作業が全て完了し現場は閉鎖されたが、住民や家族からの安否や現場状況に関する問い合わせが続いている。避難所への新規来所住民もあり、名簿・安否確認リストの照合が必要。	撤収後の問い合わせ窓口設置・運用、安否確認リスト・避難所情報の一元管理、現場立入規制の徹底、住民・家族への丁寧な説明体制、名簿・リストの整合性確保、関係機関との情報共有、活動記録・問い合わせ記録の整備	平成30年7月豪雨（西日本豪雨）岡山県真備町などで、救助活動終息・現場閉鎖後も住民や家族からの問い合わせが殺到し、安否確認・情報提供体制の整備が課題となった事例あり。	['現場閉鎖後の管理不備による安全リスク', '住民・家族への説明対応の遅延', '名簿・安否確認リストの整合性不備']	['住民・家族の不安増大', '現場立入規制の徹底不足', '現場と本部間の情報伝達遅延']
		1-22	751.536	発災から110分	現場閉鎖後の問い合わせ内容の追加整理と避難所情報の再確認（続報）	自治体職員	○○付近（住所：枚方市楠葉朝日一丁目9、UTM座標：〇〇〇〇〇〇）の現場閉鎖後、災害対策本部や問い合わせ窓口に引き続き『避難した家族の安否や居場所が分からない』『避難所で会えない』『新たに避難所に到着した住民の情報がある』などの問い合わせ・追加情報が寄せられている。避難所名簿・安否確認リストとの照合・再整理を継続中。	現場管理は既に消防から警察・自治体に引き継がれており、問い合わせ窓口は市役所災害対策本部で継続運用中。現場の立入は引き続き規制中。避難所には新たな住民の追加来所情報もあり。避難所間の移動や名簿記載漏れも確認されている。	標高約12.8m、傾斜1.3%のごく緩やかな低地。淀川氾濫流による排水能力を超えた冠水が住宅地全体に波及しやすく、道路・敷地の水没と孤立化リスクが高い。高台や迂回路がなく、地域全体が浸水域に取り残されやすい。	現場閉鎖後の住民・家族対応、問い合わせ窓口運用訓練、避難所名簿・安否確認リストの整合・再整理、住民・家族への説明体制強化	救助・撤収・現場閉鎖後も住民や家族からの問い合わせが継続。問い合わせ窓口の運用、名簿・安否確認リストの一元管理・整合性確保、住民・家族への説明・安心確保、避難所間移動や新規来所情報の追加整理が訓練のポイント。	問い合わせ窓口での丁寧な対応、安否確認リストや避難所情報の照合・案内、現場立入規制や安全状況の説明、問い合わせ内容の記録、名簿不一致時の追加確認・調整、避難所間の情報共有、必要に応じて関係機関への連絡・調整。	問い合わせ件数の増加による対応遅延、名簿と安否確認リストの不一致・照合遅延、避難所間の情報共有不足、情報伝達の行き違い、現場閉鎖後の立入希望者対応、住民・家族の不安や混乱の拡大	3.0m以上5.0m未満の浸水が住宅1階全体・屋根上に継続（24時間以上72時間未満継続予想）	住宅被害（床上浸水・屋根上避難）・住民孤立・現場閉鎖後の住民対応	住宅1階全体が長時間浸水し、住民は2階や屋根上に避難していた。救助・搬送・安否確認・撤収作業が全て完了し現場は閉鎖されたが、住民や家族からの安否や現場状況に関する問い合わせが続いている。避難所への新規来所住民もあり、名簿・安否確認リストの照合が必要。避難所間の移動や名簿記載漏れも発生している。	撤収後の問い合わせ窓口設置・運用、安否確認リスト・避難所情報の一元管理、現場立入規制の徹底、住民・家族への丁寧な説明体制、名簿・リストの整合性確保、避難所間の情報共有体制強化、関係機関との情報共有、活動記録・問い合わせ記録の整備	平成30年7月豪雨（西日本豪雨）岡山県真備町などで、救助活動終息・現場閉鎖後も住民や家族からの問い合わせが殺到し、安否確認・情報提供体制の整備や避難所間の情報共有が課題となった事例あり。	['現場閉鎖後の管理不備による安全リスク', '住民・家族への説明対応の遅延', '名簿・安否確認リストの整合性不備', '避難所間の情報共有不足']	['住民・家族の不安増大', '現場立入規制の徹底不足', '現場と本部間の情報伝達遅延']
		1-23	751.536	発災から115分	現場閉鎖後の問い合わせ内容の最終整理と避難所情報の再照合（続報）	自治体職員	○○付近（住所：枚方市楠葉朝日一丁目9、UTM座標：〇〇〇〇〇〇）の現場閉鎖後、災害対策本部や問い合わせ窓口に引き続き『避難した家族の安否や居場所が分からない』『避難所で会えない』『避難所に新たに到着した住民の情報がある』等の問い合わせや追加情報が寄せられている。避難所名簿や安否確認リストとの照合・再整理を続行中。	現場管理は既に消防から警察・自治体に引き継がれている。問い合わせ窓口は市役所災害対策本部で運用中。避難所には新たな住民の追加来所情報もあり、避難所間の移動や名簿記載漏れも散見されている。	標高約12.8m、傾斜1.3%のごく緩やかな低地。淀川氾濫流による排水能力を超えた冠水が住宅地全体に波及しやすく、道路・敷地の水没と孤立化リスクが高い。高台や迂回路がなく、地域全体が浸水域に取り残されやすい。	現場閉鎖後の住民・家族対応、問い合わせ窓口運用訓練、避難所名簿・安否確認リストの整合・再整理、住民・家族への説明体制強化	救助・撤収・現場閉鎖後も住民や家族からの問い合わせが継続。問い合わせ窓口の運用、名簿・安否確認リストの一元管理・整合性確保、住民・家族への説明・安心確保、避難所間移動や新規来所情報の追加整理が訓練のポイント。	問い合わせ窓口での丁寧な対応、安否確認リストや避難所情報の照合・案内、現場立入規制や安全状況の説明、問い合わせ内容の記録、名簿不一致時の追加確認・調整、避難所間の情報共有、必要に応じて関係機関への連絡・調整。	問い合わせ件数の増加による対応遅延、名簿と安否確認リストの不一致・照合遅延、避難所間の情報共有不足、情報伝達の行き違い、現場閉鎖後の立入希望者対応、住民・家族の不安や混乱の拡大	3.0m以上5.0m未満の浸水が住宅1階全体・屋根上に継続（24時間以上72時間未満継続予想）	住宅被害（床上浸水・屋根上避難）・住民孤立・現場閉鎖後の住民対応	住宅1階全体が長時間浸水し、住民は2階や屋根上に避難していた。救助・搬送・安否確認・撤収作業が全て完了し現場は閉鎖されたが、住民や家族からの安否や現場状況に関する問い合わせが続いている。避難所への新規来所住民もあり、名簿・安否確認リストの照合が必要。避難所間の移動や名簿記載漏れも発生している。	撤収後の問い合わせ窓口設置・運用、安否確認リスト・避難所情報の一元管理、現場立入規制の徹底、住民・家族への丁寧な説明体制、名簿・リストの整合性確保、避難所間の情報共有体制強化、関係機関との情報共有、活動記録・問い合わせ記録の整備	平成30年7月豪雨（西日本豪雨）岡山県真備町などで、救助活動終息・現場閉鎖後も住民や家族からの問い合わせが殺到し、安否確認・情報提供体制の整備や避難所間の情報共有が課題となった事例あり。	['現場閉鎖後の管理不備による安全リスク', '住民・家族への説明対応の遅延', '名簿・安否確認リストの整合性不備', '避難所間の情報共有不足']	['住民・家族の不安増大', '現場立入規制の徹底不足', '現場と本部間の情報伝達遅延']
		1-24	751.536	発災から118分	現場閉鎖後の問い合わせ内容の最終整理と避難所情報の再照合（続報）	自治体職員	○○付近（住所：枚方市楠葉朝日一丁目9、UTM座標：〇〇〇〇〇〇）の現場閉鎖後、災害対策本部や問い合わせ窓口に引き続き『避難した家族の安否や居場所が分からない』『避難所で会えない』『避難所に新たに到着した住民の情報がある』等の問い合わせや追加情報が寄せられています。避難所名簿や安否確認リストとの照合・再整理を続行中です。	現場管理は既に消防から警察・自治体に引き継がれています。問い合わせ窓口は市役所災害対策本部で運用中。避難所には新たな住民の追加来所情報もあり、避難所間の移動や名簿記載漏れも散見されています。	標高約12.8m、傾斜1.3%のごく緩やかな低地。淀川氾濫流による排水能力を超えた冠水が住宅地全体に波及しやすく、道路・敷地の水没と孤立化リスクが高い。高台や迂回路がなく、地域全体が浸水域に取り残されやすい。	現場閉鎖後の住民・家族対応、問い合わせ窓口運用訓練、避難所名簿・安否確認リストの整合・再整理、住民・家族への説明体制強化	救助・撤収・現場閉鎖後も住民や家族からの問い合わせが継続。問い合わせ窓口の運用、名簿・安否確認リストの一元管理・整合性確保、住民・家族への説明・安心確保、避難所間移動や新規来所情報の追加整理が訓練のポイント。	問い合わせ窓口での丁寧な対応、安否確認リストや避難所情報の照合・案内、現場立入規制や安全状況の説明、問い合わせ内容の記録、名簿不一致時の追加確認・調整、避難所間の情報共有、必要に応じて関係機関への連絡・調整。	問い合わせ件数の増加による対応遅延、名簿と安否確認リストの不一致・照合遅延、避難所間の情報共有不足、情報伝達の行き違い、現場閉鎖後の立入希望者対応、住民・家族の不安や混乱の拡大	3.0m以上5.0m未満の浸水が住宅1階全体・屋根上に継続（24時間以上72時間未満継続予想）	住宅被害（床上浸水・屋根上避難）・住民孤立・現場閉鎖後の住民対応	住宅1階全体が長時間浸水し、住民は2階や屋根上に避難していた。救助・搬送・安否確認・撤収作業が全て完了し現場は閉鎖されたが、住民や家族からの安否や現場状況に関する問い合わせが続いている。避難所への新規来所住民もあり、名簿・安否確認リストの照合が必要。避難所間の移動や名簿記載漏れも発生している。	撤収後の問い合わせ窓口設置・運用、安否確認リスト・避難所情報の一元管理、現場立入規制の徹底、住民・家族への丁寧な説明体制、名簿・リストの整合性確保、避難所間の情報共有体制強化、関係機関との情報共有、活動記録・問い合わせ記録の整備	平成30年7月豪雨（西日本豪雨）岡山県真備町などで、救助活動終息・現場閉鎖後も住民や家族からの問い合わせが殺到し、安否確認・情報提供体制の整備や避難所間の情報共有が課題となった事例あり。	['現場閉鎖後の管理不備による安全リスク', '住民・家族への説明対応の遅延', '名簿・安否確認リストの整合性不備', '避難所間の情報共有不足']	['住民・家族の不安増大', '現場立入規制の徹底不足', '現場と本部間の情報伝達遅延']
		1-25	751.536	発災から124分	現場閉鎖後の問い合わせ内容の最終整理と避難所情報の再照合（追加対応）	自治体職員	○○付近（住所：枚方市楠葉朝日一丁目9、UTM座標：〇〇〇〇〇〇）の現場閉鎖後、災害対策本部や問い合わせ窓口に『避難した家族の安否や居場所が分からない』『避難所で会えない』『新たに避難所に到着した住民の情報がある』『健康状態が不安な高齢者が避難所にいる』等の問い合わせや追加情報が寄せられています。避難所名簿や安否確認リストとの照合・再整理と、健康観察の追加対応を続行中です。	現場管理は既に消防から警察・自治体に引き継がれています。問い合わせ窓口は市役所災害対策本部で運用中。避難所には新たな住民の追加来所情報や健康観察要請もあり、避難所間の移動や名簿記載漏れも散見されています。健康観察は医療スタッフ増員で対応中です。	標高約12.8m、傾斜1.3%のごく緩やかな低地。淀川氾濫流による排水能力を超えた冠水が住宅地全体に波及しやすく、道路・敷地の水没と孤立化リスクが高い。高台や迂回路がなく、地域全体が浸水域に取り残されやすい。	現場閉鎖後の住民・家族対応、問い合わせ窓口運用訓練、避難所名簿・安否確認リストの整合・再整理、住民・家族への説明体制強化、健康観察体制の拡充	救助・撤収・現場閉鎖後も住民や家族からの問い合わせが継続。問い合わせ窓口の運用、名簿・安否確認リストの一元管理・整合性確保、住民・家族への説明・安心確保、避難所間移動や新規来所情報の追加整理、避難所での健康観察体制強化が訓練のポイント。	問い合わせ窓口での丁寧な対応、安否確認リストや避難所情報の照合・案内、現場立入規制や安全状況の説明、問い合わせ内容の記録、名簿不一致時の追加確認・調整、避難所間の情報共有、健康観察の実施と記録、必要に応じて関係機関への連絡・調整。	問い合わせ件数の増加による対応遅延、名簿と安否確認リストの不一致・照合遅延、避難所間の情報共有不足、健康観察の人員・資材不足、情報伝達の行き違い、現場閉鎖後の立入希望者対応、住民・家族の不安や混乱の拡大	3.0m以上5.0m未満の浸水が住宅1階全体・屋根上に継続（24時間以上72時間未満継続予想）	住宅被害（床上浸水・屋根上避難）・住民孤立・現場閉鎖後の住民対応・避難所健康観察	住宅1階全体が長時間浸水し、住民は2階や屋根上に避難していた。救助・搬送・安否確認・撤収作業が全て完了し現場は閉鎖されたが、住民や家族からの安否や現場状況に関する問い合わせが続いている。避難所への新規来所住民もあり、名簿・安否確認リストの照合が必要。避難所では医療スタッフ増員による健康観察体制強化も進行中。避難所間の移動や名簿記載漏れも発生している。	撤収後の問い合わせ窓口設置・運用、安否確認リスト・避難所情報の一元管理、現場立入規制の徹底、住民・家族への丁寧な説明体制、名簿・リストの整合性確保、避難所間の情報共有体制強化、健康観察・医療スタッフの増員、関係機関との情報共有、活動記録・問い合わせ記録の整備	平成30年7月豪雨（西日本豪雨）岡山県真備町などで、救助活動終息・現場閉鎖後も住民や家族からの問い合わせが殺到し、安否確認・情報提供体制や避難所内の健康観察体制の整備が課題となった事例あり。	['現場閉鎖後の管理不備による安全リスク', '住民・家族への説明対応の遅延', '名簿・安否確認リストの整合性不備', '避難所間の情報共有不足', '避難所での健康急変・感染症拡大']	['住民・家族の不安増大', '現場立入規制の徹底不足', '現場と本部間の情報伝達遅延', '避難所内でのパニック・混乱拡大', '医療資材・人員の不足による二次的健康被害']
		1-26	751.536	発災から128分	現場閉鎖後の問い合わせ内容の最終整理・避難所健康観察体制の再点検	自治体職員	○○付近（住所：枚方市楠葉朝日一丁目9、UTM座標：〇〇〇〇〇〇）の現場閉鎖後、災害対策本部や問い合わせ窓口に引き続き『避難した家族の安否や居場所が分からない』『避難所で会えない』『新たに避難所に到着した住民の情報がある』『健康状態が不安な高齢者が避難所にいる』等の問い合わせや追加情報が寄せられています。避難所名簿や安否確認リストとの照合・再整理、健康観察体制の再点検を続行中です。	避難所には新たな住民の追加来所情報や健康観察要請もあり、避難所間の移動や名簿記載漏れも散見されています。健康観察は医療スタッフ増員で対応中。感染症の疑いがある場合は隔離スペースを設置しています。	標高約12.8m、傾斜1.3%のごく緩やかな低地。淀川氾濫流による排水能力を超えた冠水が住宅地全体に波及しやすく、道路・敷地の水没と孤立化リスクが高い。高台や迂回路がなく、地域全体が浸水域に取り残されやすい。	現場閉鎖後の住民・家族対応、問い合わせ窓口運用訓練、避難所名簿・安否確認リストの整合・再整理、健康観察体制の拡充、住民・家族への説明体制強化	救助・撤収・現場閉鎖後も住民や家族からの問い合わせが継続。問い合わせ窓口の運用、名簿・安否確認リストの一元管理・整合性確保、避難所健康観察体制強化、避難所間移動や新規来所情報の追加整理が訓練ポイント。感染症疑い時の隔離・衛生管理も重要。	問い合わせ窓口での丁寧な対応、安否確認リストや避難所情報の照合・案内、避難所健康観察の再点検と記録、感染症疑い者の隔離措置、現場立入規制や安全状況の説明、名簿不一致時の追加確認・調整、避難所間の情報共有、必要に応じて関係機関への連絡・調整	問い合わせ件数の増加による対応遅延、名簿と安否確認リストの不一致・照合遅延、避難所間の情報共有不足、健康観察の人員・資材不足、感染症対策の徹底困難、情報伝達の行き違い、現場閉鎖後の立入希望者対応、住民・家族の不安や混乱の拡大	3.0m以上5.0m未満の浸水が住宅1階全体・屋根上に継続（24時間以上72時間未満継続予想）	住宅被害（床上浸水・屋根上避難）・住民孤立・現場閉鎖後の住民対応・避難所健康観察	住宅1階全体が長時間浸水し、住民は2階や屋根上に避難していた。救助・搬送・安否確認・撤収作業が全て完了し現場は閉鎖されたが、住民や家族からの安否や現場状況に関する問い合わせが続いている。避難所への新規来所住民もあり、名簿・安否確認リストの照合が必要。避難所では医療スタッフ増員による健康観察体制強化も進行中。避難所間の移動や名簿記載漏れも発生している。	問い合わせ窓口設置・運用、安否確認リスト・避難所情報の一元管理、現場立入規制の徹底、住民・家族への丁寧な説明体制、名簿・リストの整合性確保、避難所間の情報共有体制強化、健康観察・医療スタッフの増員、感染症対策（隔離・消毒・換気）、関係機関との情報共有、活動記録・問い合わせ記録の整備	平成30年7月豪雨（西日本豪雨）岡山県真備町などで、救助活動終息・現場閉鎖後も住民や家族からの問い合わせが殺到し、安否確認・情報提供体制や避難所内の健康観察体制の整備が課題となった事例あり。感染症疑い者の隔離・衛生管理の遅れが混乱を招いた例も報告されている。	['現場閉鎖後の管理不備による安全リスク', '住民・家族への説明対応の遅延', '名簿・安否確認リストの整合性不備', '避難所間の情報共有不足', '避難所での健康急変・感染症拡大']	['住民・家族の不安増大', '現場立入規制の徹底不足', '現場と本部間の情報伝達遅延', '避難所内でのパニック・混乱拡大', '医療資材・人員の不足による二次的健康被害']
		1-27	751.536	発災から131分	避難所内での体調不良者追加発生・健康観察体制の夜間強化要請	避難所職員	○○付近（住所：枚方市楠葉朝日一丁目9、UTM座標：〇〇〇〇〇〇）の避難所で、夜間に新たに発熱や咳、倦怠感を訴える住民が2名発生。既存の健康観察体制・隔離スペースでは対応が難しくなり、夜間の医療スタッフ増員や追加隔離スペースの設置が必要との報告が入った。	体調不良者は高齢者1名と成人1名。夜間のため医療機関への即時搬送は困難。家族は同避難所内に同伴。自治体本部・医療機関には連絡済み。	標高約12.8m、傾斜1.3%のごく緩やかな低地。淀川氾濫流による長時間浸水域にあり、避難所も低地部のため住民密集・健康リスクが高い。	避難所運営での夜間体調急変対応、健康観察・感染症対策体制の実効性向上、住民説明・安心確保、記録管理の徹底訓練	夜間に新規体調不良者が発生し、既存隔離スペースが満床または不足。追加の隔離・健康観察体制強化、夜間の医療スタッフ体制確保、住民説明・名簿管理が訓練ポイント。	夜間の体調不良者への応急対応、追加隔離スペースの迅速設置、医療スタッフや保健師の夜間シフト調整、症状者の経過観察記録、住民・家族への状況説明と安心確保、健康観察記録・名簿の更新、自治体・医療機関との情報共有。	夜間の人員・医療資材不足、隔離スペースの確保困難、住民・家族の不安拡大、体調不良者の重症化リスク、記録管理や名簿更新の遅れ、他住民への感染拡大防止の徹底困難	3.0m以上5.0m未満の浸水が住宅1階全体・屋根上に継続（24時間以上72時間未満継続予想）	避難所運営・健康被害・感染症対策・夜間対応	避難所での長時間滞在・密集状態により夜間に体調不良者が追加発生。既存の隔離スペースが満床となり、追加隔離や夜間の医療スタッフ体制強化が急務。住民・家族の不安や混乱も拡大しやすい状況。	夜間も含めた定期的な健康観察・体調管理、感染症対策（隔離・消毒・換気・動線分離）、医療スタッフ・保健師の夜間シフト体制、衛生資材の十分な備蓄・迅速補給、住民説明・安心確保の体制強化、名簿・健康観察記録の徹底	平成30年7月豪雨（西日本豪雨）岡山県真備町などで、避難所内での感染症疑い・健康急変事案が多発し、夜間の医療体制や衛生資材不足、住民説明体制の課題が指摘された。	['避難所内での健康急変・感染症拡大', '体調不良者の重症化・医療搬送遅延', '名簿管理・健康観察の遅延', '住民の不安・混乱拡大']	['避難所内のパニック・不安拡大', '感染症の集団発生による避難所閉鎖リスク', '医療機関の受入超過・連携遅延', '衛生資材不足による二次的健康被害']
		1-28	751.536	発災から138分	避難所内での夜間追加体調不良者発生と隔離・医療体制の限界	避難所職員	○○付近（住所：枚方市楠葉朝日一丁目9、UTM座標：〇〇〇〇〇〇）の避難所で、夜間の健康観察巡回中に新たに発熱や咳、倦怠感を訴える住民がさらに1名発生。既存の隔離スペースは満床となり、追加の隔離場所や夜間の医療スタッフ体制も限界に近づいている。	体調不良者は成人男性。家族は同避難所内に同伴しているが、夜間のため医療機関への即時搬送は翌朝以降を検討。自治体本部・医療機関には追加連絡済み。	標高約12.8m、傾斜1.3%のごく緩やかな低地。淀川氾濫流による長時間浸水域にあり、避難所も低地部のため住民密集・健康リスクが高い。	避難所運営時の夜間体調急変・隔離体制の限界対応、追加スペース確保・住民説明・医療スタッフ夜間運用の判断訓練	夜間に体調不良者が連続発生し、隔離スペース・医療スタッフとも限界。追加隔離スペースの設営判断、夜間の医療体制維持、住民説明・不安対応、記録管理が訓練ポイント。	夜間の体調不良者への応急対応、追加隔離スペースの即時設営検討、医療スタッフの夜間対応体制調整、症状者の経過観察記録、住民・家族への状況説明と不安対応、名簿・健康観察記録の更新、自治体・医療機関との情報共有。	隔離スペースの物理的限界、夜間の人員・医療資材不足、体調不良者の重症化リスク、住民・家族の不安拡大、夜間の記録管理や名簿更新の遅延、感染拡大防止の徹底困難	3.0m以上5.0m未満の浸水が住宅1階全体・屋根上に継続（24時間以上72時間未満継続予想）	避難所運営・健康被害・感染症対策・夜間対応	避難所での長時間滞在・密集状態により夜間に体調不良者が追加発生。既存の隔離スペースが満床となり、追加隔離や夜間の医療スタッフ体制強化が急務。住民・家族の不安や混乱も拡大しやすい状況。	夜間も含めた定期的な健康観察・体調管理、感染症対策（隔離・消毒・換気・動線分離）、医療スタッフ・保健師の夜間シフト体制、衛生資材の十分な備蓄・迅速補給、住民説明・安心確保の体制強化、名簿・健康観察記録の徹底	平成30年7月豪雨（西日本豪雨）岡山県真備町などで、避難所内での感染症疑い・健康急変事案が多発し、夜間の医療体制や衛生資材不足、住民説明体制の課題が指摘された。	['避難所内での健康急変・感染症拡大', '体調不良者の重症化・医療搬送遅延', '名簿管理・健康観察の遅延', '住民の不安・混乱拡大']	['避難所内のパニック・不安拡大', '感染症の集団発生による避難所閉鎖リスク', '医療機関の受入超過・連携遅延', '衛生資材不足による二次的健康被害']
		1-29	751.536	発災から141分	避難所内での夜間体調不良者増加・隔離スペース拡張判断	避難所職員	○○付近（住所：枚方市楠葉朝日一丁目9、UTM座標：〇〇〇〇〇〇）の避難所で、夜間健康観察中に新たに発熱・咳・倦怠感を訴える住民がさらに1名発生。既存の隔離スペースは満床となっており、追加隔離スペースの設営を検討中。夜間のため医療機関搬送は翌朝以降を予定し、経過観察と家族の動線分離を実施している。	新たな体調不良者は高齢女性1名。家族は同避難所内に同伴。自治体本部・医療機関には追加連絡済み。夜間のため医療スタッフの対応体制も逼迫。	標高約12.8m、傾斜1.3%のごく緩やかな低地。淀川氾濫流による長時間浸水域にあり、避難所も低地部のため住民密集・健康リスクが高い。	夜間の避難所運営における体調急変・感染症疑い時の隔離スペース拡張判断、医療スタッフ夜間運用・住民説明・不安対応の訓練	夜間に体調不良者が連続発生し、隔離スペース・医療スタッフとも限界。教室や会議室等を転用した追加隔離スペースの設営判断、夜間体制の維持、住民説明・不安対応、記録管理が訓練ポイント。	夜間の体調不良者への応急対応、追加隔離スペースの即時設営検討、医療スタッフの夜間対応体制調整、症状者の経過観察記録、住民・家族への状況説明と不安対応、名簿・健康観察記録の更新、自治体・医療機関との情報共有	隔離スペースの物理的限界、夜間の人員・医療資材不足、体調不良者の重症化リスク、住民・家族の不安拡大、夜間の記録管理や名簿更新の遅延、感染拡大防止の徹底困難	3.0m以上5.0m未満の浸水が住宅1階全体・屋根上に継続（24時間以上72時間未満継続予想）	避難所運営・健康被害・感染症対策・夜間対応	避難所での長時間滞在・密集状態により夜間に体調不良者がさらに発生。既存の隔離スペースが満床となり、追加隔離や夜間の医療スタッフ体制強化が急務。住民・家族の不安や混乱も拡大しやすい状況。	夜間も含めた定期的な健康観察・体調管理、感染症対策（隔離・消毒・換気・動線分離）、医療スタッフ・保健師の夜間シフト体制、衛生資材の十分な備蓄・迅速補給、住民説明・安心確保の体制強化、名簿・健康観察記録の徹底、追加隔離スペース転用の事前マニュアル整備	平成30年7月豪雨（西日本豪雨）岡山県真備町などで、避難所内での感染症疑い・健康急変事案が多発し、夜間の医療体制や衛生資材不足、住民説明体制の課題が指摘された。	['避難所内での健康急変・感染症拡大', '体調不良者の重症化・医療搬送遅延', '名簿管理・健康観察の遅延', '住民の不安・混乱拡大']	['避難所内のパニック・不安拡大', '感染症の集団発生による避難所閉鎖リスク', '医療機関の受入超過・連携遅延', '衛生資材不足による二次的健康被害']
		1-30	751.536	発災から146分	避難所内での夜間体調不良者追加発生・隔離スペース・医療スタッフ対応限界への警戒	避難所職員	○○付近（住所：枚方市楠葉朝日一丁目9、UTM座標：〇〇〇〇〇〇）の避難所で、夜間健康観察中にさらに1名（成人女性）が発熱・咳・倦怠感を訴えた。既存の隔離スペースは満床であり、追加の隔離スペース設営と夜間の医療スタッフ増員を現場で検討している。	体調不良者は成人女性1名。家族は同避難所内に同伴。自治体本部・医療機関には追加連絡済み。夜間のため医療スタッフの対応体制が限界に近い状況。	標高約12.8m、傾斜1.3%のごく緩やかな低地。淀川氾濫流による長時間浸水域にあり、避難所も低地部のため住民密集・健康リスクが高い。	避難所運営時の夜間体調急変・感染症疑い時の隔離スペース拡張判断、医療スタッフ夜間運用・住民説明・不安対応の訓練	夜間に体調不良者が連続発生し、隔離スペース・医療スタッフともに限界。教室や会議室等を転用した追加隔離スペースの設営判断、夜間体制の維持、住民説明・不安対応、記録管理が訓練ポイント。	夜間の体調不良者への応急対応、追加隔離スペースの即時設営検討、医療スタッフの夜間対応体制調整、症状者の経過観察記録、住民・家族への状況説明と不安対応、名簿・健康観察記録の更新、自治体・医療機関との情報共有	隔離スペースの物理的限界、夜間の人員・医療資材不足、体調不良者の重症化リスク、住民・家族の不安拡大、夜間の記録管理や名簿更新の遅延、感染拡大防止の徹底困難	3.0m以上5.0m未満の浸水が住宅1階全体・屋根上に継続（24時間以上72時間未満継続予想）	避難所運営・健康被害・感染症対策・夜間対応	避難所での長時間滞在・密集状態により夜間に体調不良者がさらに発生。既存の隔離スペースが満床となり、追加隔離や夜間の医療スタッフ体制強化が急務。住民・家族の不安や混乱も拡大しやすい状況。	夜間も含めた定期的な健康観察・体調管理、感染症対策（隔離・消毒・換気・動線分離）、医療スタッフ・保健師の夜間シフト体制、衛生資材の十分な備蓄・迅速補給、住民説明・安心確保の体制強化、名簿・健康観察記録の徹底、追加隔離スペース転用の事前マニュアル整備	平成30年7月豪雨（西日本豪雨）岡山県真備町などで、避難所内での感染症疑い・健康急変事案が多発し、夜間の医療体制や衛生資材不足、住民説明体制の課題が指摘された。	['避難所内での健康急変・感染症拡大', '体調不良者の重症化・医療搬送遅延', '名簿管理・健康観察の遅延', '住民の不安・混乱拡大']	['避難所内のパニック・不安拡大', '感染症の集団発生による避難所閉鎖リスク', '医療機関の受入超過・連携遅延', '衛生資材不足による二次的健康被害']
		1-31	751.536	発災から151分	避難所内での夜間体調不良者追加発生・隔離スペース再拡張対応	避難所職員	○○付近（住所：枚方市楠葉朝日一丁目9、UTM座標：〇〇〇〇〇〇）の避難所で、夜間見回り中にさらに2名（高齢男性1名・成人女性1名）が発熱・咳・全身倦怠感を訴えた。これまで設営した隔離スペースも満床となり、職員による更なる追加隔離スペース（会議室や廊下の一部区画等の転用）の設営を現場判断で開始。夜間のため医療機関への搬送は翌朝以降を予定し、症状者の経過観察と家族の動線分離を実施している。	新たな体調不良者は高齢男性1名と成人女性1名。家族は同避難所内に同伴。自治体本部・医療機関には追加連絡済み。夜間のため医療スタッフの対応体制も逼迫。	標高約12.8m、傾斜1.3%のごく緩やかな低地。淀川氾濫流による長時間浸水域にあり、避難所も低地部のため住民密集・健康リスクが高い。	避難所運営時の夜間体調急変・隔離スペース再拡張対応、現場判断力・住民説明・感染症対策の現場運用訓練	夜間に体調不良者が連続発生し、既存隔離スペース・医療スタッフともに限界。会議室や廊下区画等を転用した更なる追加隔離スペース設営、夜間体制の維持、住民説明・不安対応、名簿・健康観察記録の徹底が訓練ポイント。	夜間の体調不良者への応急対応、追加隔離スペース（会議室・廊下等）の即時設営、医療スタッフの夜間対応体制調整、症状者の経過観察記録、住民・家族への状況説明と不安対応、名簿・健康観察記録の更新、自治体・医療機関との情報共有。	隔離スペースの物理的限界に伴う収容困難、夜間の人員・医療資材不足、体調不良者の重症化リスク、住民・家族の不安拡大、夜間の記録管理や名簿更新の遅延、感染拡大防止の徹底困難	3.0m以上5.0m未満の浸水が住宅1階全体・屋根上に継続（24時間以上72時間未満継続予想）	避難所運営・健康被害・感染症対策・夜間対応	避難所での長時間滞在・密集状態により、夜間に体調不良者がさらに追加発生。既存・追加の隔離スペースが満床となり、会議室や廊下区画等を転用した更なる追加隔離スペースの設営が急務。住民・家族の不安や混乱も拡大しやすい状況で、夜間の医療スタッフ体制も逼迫している。	夜間も含めた定期的な健康観察・体調管理、感染症対策（隔離・消毒・換気・動線分離）、医療スタッフ・保健師の夜間シフト体制、衛生資材の十分な備蓄・迅速補給、住民説明・安心確保の体制強化、名簿・健康観察記録の徹底、追加スペース転用の事前マニュアル整備	平成30年7月豪雨（西日本豪雨）岡山県真備町などで、避難所内での感染症疑い・健康急変事案が多発し、夜間の医療体制や衛生資材不足、住民説明体制の課題が指摘された。	['避難所内での健康急変・感染症拡大', '体調不良者の重症化・医療搬送遅延', '名簿管理・健康観察の遅延', '住民の不安・混乱拡大']	['避難所内のパニック・不安拡大', '感染症の集団発生による避難所閉鎖リスク', '医療機関の受入超過・連携遅延', '衛生資材不足による二次的健康被害']
		1-32	751.536	発災から159分	避難所内での夜間体調不良者多発・隔離スペースの限界突破と緊急対応会議の開催要請	避難所職員	○○付近（住所：枚方市楠葉朝日一丁目9、UTM座標：〇〇〇〇〇〇）の避難所で、夜間巡回中にさらに2名（成人女性1名・小児1名）が発熱・咳・全身倦怠感を訴えた。これまで設営した隔離スペースや廊下・会議室等の転用スペースも全て満床となり、現場の感染症対応体制・医療スタッフ・衛生資材の限界について緊急会議を開催する必要が生じている。	新たな体調不良者は成人女性と小児。家族は同避難所内に同伴。夜間のため医療機関搬送は翌朝以降を想定。自治体本部・医療機関には追加連絡済み。住民からは『これ以上の感染拡大が心配』『夜間でも何らかの追加対応を』との強い要望が出ている。	標高約12.8m、傾斜1.3%のごく緩やかな低地。淀川氾濫流による長時間浸水域にあり、避難所も低地部のため住民密集・健康リスクが高い。	避難所運営時の夜間体調急変・隔離スペース限界突破時の緊急現場会議・意思決定訓練、住民説明・感染症対策・医療スタッフ夜間運用・現場判断力強化	避難所での体調不良者が連続発生し、全ての隔離スペースが満床。現場医療体制・衛生資材・人員が限界に達した段階で、職員間の緊急対応会議を開催し、今後の感染症対策・住民説明・自治体本部への支援要請など総合的な現場判断が必要となる。	夜間の体調不良者への応急対応、既存隔離スペースの再確認、緊急現場会議の開催（医療スタッフ・自治体職員・避難所責任者）、自治体本部への追加支援要請、住民・家族への状況説明と不安対応、感染症対策の再徹底、名簿・健康観察記録の更新、翌朝以降の医療搬送計画策定、自治体・医療機関との情報共有。	隔離スペース・医療資材の物理的限界、夜間の人員・医療スタッフ不足、体調不良者の重症化リスク、住民・家族の不安拡大、現場判断の遅れや混乱、名簿・健康観察記録の遅延、感染拡大防止の徹底困難	3.0m以上5.0m未満の浸水が住宅1階全体・屋根上に継続（24時間以上72時間未満継続予想）	避難所運営・健康被害・感染症対策・夜間対応・現場判断	避難所での長時間滞在・密集状態により、夜間に体調不良者がさらに追加発生。既存・追加の隔離スペースが全て満床となり、現場の医療体制・衛生資材・人員が限界に達したことで、職員間で緊急会議を開催し、今後の感染症対策・住民説明・自治体本部への支援要請など総合的な現場判断が必要となっている。	夜間も含めた定期的な健康観察・体調管理、感染症対策（隔離・消毒・換気・動線分離）、医療スタッフ・保健師の夜間シフト体制、衛生資材の十分な備蓄・迅速補給、住民説明・安心確保の体制強化、名簿・健康観察記録の徹底、現場緊急会議マニュアルの整備、自治体・医療機関との連携強化	平成30年7月豪雨（西日本豪雨）岡山県真備町などで、避難所内での感染症疑い・健康急変事案が多発し、夜間の医療体制や衛生資材不足、住民説明体制の課題、現場判断の遅れが指摘された。	['避難所内での健康急変・感染症拡大', '体調不良者の重症化・医療搬送遅延', '名簿管理・安否確認の遅延', '住民の不安・混乱拡大', '現場判断の遅れによる対応遅延']	['避難所内のパニック・不安拡大', '感染症の集団発生による避難所閉鎖リスク', '医療機関の受入超過・連携遅延', '衛生資材不足による二次的健康被害']
		1-33	751.536	発災から162分	避難所内での夜間体調不良者の継続発生・現場対応限界突破と自治体本部への追加支援要請	避難所職員	○○付近（住所：枚方市楠葉朝日一丁目9、UTM座標：〇〇〇〇〇〇）の避難所で、夜間巡回中に新たに2名（成人男性1名・高齢女性1名）が発熱・咳・全身倦怠感を訴えた。隔離スペースは全て満床となっており、現場での対応が限界に近づいているため、自治体本部に対し緊急で追加の医療スタッフ・衛生資材・簡易隔離テントの派遣を要請した。	新たな体調不良者の家族は同避難所内に同伴。夜間のため医療機関搬送は翌朝以降を想定。住民からは『感染拡大が心配』『夜間でも追加対応を』との要望が続いている。	標高約12.8m、傾斜1.3%のごく緩やかな低地。淀川氾濫流による長時間浸水域にあり、避難所も低地部のため住民密集・健康リスクが高い。	避難所運営時の夜間体調急変・隔離スペース限界突破時の自治体本部への追加支援要請、現場判断力・住民説明・感染症対策の現場運用訓練	夜間に体調不良者がさらに追加発生し、全ての隔離スペースが満床。現場の医療体制・衛生資材・人員が限界に達した段階で、自治体本部への追加支援要請を迅速に行う判断力と、住民説明・感染症対策徹底が訓練ポイント。	夜間の体調不良者への応急対応、自治体本部への医療スタッフ・衛生資材・隔離テント等の追加派遣要請、症状者の経過観察記録、住民・家族への状況説明と不安対応、名簿・健康観察記録の更新、翌朝以降の医療搬送計画策定、自治体・医療機関との情報共有。	隔離スペースや医療資材の物理的限界、夜間の人員・医療スタッフ不足、体調不良者の重症化リスク、住民・家族の不安拡大、現場判断の遅れや混乱、名簿・健康観察記録の遅延、感染拡大防止の徹底困難	3.0m以上5.0m未満の浸水が住宅1階全体・屋根上に継続（24時間以上72時間未満継続予想）	避難所運営・健康被害・感染症対策・夜間対応・自治体本部連携	避難所での長時間滞在・密集状態により、夜間に体調不良者がさらに追加発生。既存・追加の隔離スペースが全て満床となり、現場の医療体制・衛生資材・人員が限界に達したことで、自治体本部への追加支援要請を実施。住民・家族の不安や混乱も拡大しやすい状況。	夜間も含めた定期的な健康観察・体調管理、感染症対策（隔離・消毒・換気・動線分離）、医療スタッフ・保健師の夜間シフト体制、衛生資材の十分な備蓄・迅速補給、住民説明・安心確保の体制強化、名簿・健康観察記録の徹底、自治体本部との連携と追加支援要請マニュアルの整備	平成30年7月豪雨（西日本豪雨）岡山県真備町などで、避難所内での感染症疑い・健康急変事案が多発し、夜間の医療体制や衛生資材不足、住民説明体制の課題、現場判断の遅れが指摘された。	['避難所内での健康急変・感染症拡大', '体調不良者の重症化・医療搬送遅延', '名簿管理・安否確認の遅延', '住民の不安・混乱拡大', '現場判断の遅れによる対応遅延']	['避難所内のパニック・不安拡大', '感染症の集団発生による避難所閉鎖リスク', '医療機関の受入超過・連携遅延', '衛生資材不足による二次的健康被害']
		1-34	751.536	発災から167分	避難所内での夜間体調不良者追加発生・現場体制の一時的な安定化（続報）	避難所職員	○○付近（住所：枚方市楠葉朝日一丁目9、UTM座標：〇〇〇〇〇〇）の避難所で、夜間巡回中に新たな体調不良者（発熱・咳・倦怠感を訴える成人女性1名）が発生。既存および追加の隔離スペースは満床だが、現時点で他の避難者の急激な体調悪化や集団発症はなく、職員・医療スタッフは経過観察と記録管理を強化しつつ、夜間体制を維持している。	新規体調不良者の家族は同避難所内に同伴。夜間のため医療機関搬送は翌朝以降を予定。自治体本部・医療機関には追加報告済み。住民からは『不安があるが今は落ち着いている』との声も出ている。	標高約12.8m、傾斜1.3%のごく緩やかな低地。淀川氾濫流による長時間浸水域にあり、避難所も低地部のため住民密集・健康リスクが高い。	夜間の避難所運営における追加体調不良者発生時の現場体制維持・記録管理・住民説明の訓練。自治体本部・医療機関との情報共有と現場安定化の確認。	隔離スペース満床状態で追加体調不良者が発生したが、現場体制は一時的に安定。夜間の医療体制維持、記録管理、住民説明・不安対応、翌朝以降の追加対応計画が訓練ポイント。	新規体調不良者への応急対応と経過観察、追加隔離スペース設営の検討継続、健康観察記録・名簿管理の徹底、住民・家族への状況説明と安心確保、自治体本部・医療機関への逐次報告、翌朝以降の追加対応計画の準備。	隔離スペースの物理的限界、夜間の人員・医療資材不足、住民・家族の不安継続、体調不良者の重症化リスク、記録管理や名簿更新の遅延、感染拡大防止の徹底困難	3.0m以上5.0m未満の浸水が住宅1階全体・屋根上に継続（24時間以上72時間未満継続予想）	避難所運営・健康被害・感染症対策・夜間対応	避難所での長時間滞在・密集状態により、夜間に体調不良者が連続発生。隔離スペース・医療スタッフともに限界状態だが、現場体制は一時的に安定。住民・家族の不安や混乱は継続しており、今後の追加発症や感染拡大リスクも残存。	夜間も含めた定期的な健康観察・体調管理、感染症対策（隔離・消毒・換気・動線分離）、医療スタッフの夜間シフト体制、衛生資材の十分な備蓄・迅速補給、住民説明・安心確保の体制強化、名簿・健康観察記録の徹底、翌朝以降の追加対応計画	平成30年7月豪雨（西日本豪雨）岡山県真備町などで、避難所内での感染症疑い・健康急変事案が多発し、夜間の医療体制や衛生資材不足、住民説明体制の課題が指摘された。	['避難所内での健康急変・感染症拡大', '体調不良者の重症化・医療搬送遅延', '名簿管理・安否確認の遅延', '住民の不安・混乱拡大']	['避難所内のパニック・不安拡大', '感染症の集団発生による避難所閉鎖リスク', '医療機関の受入超過・連携遅延', '衛生資材不足による二次的健康被害']
		1-35	751.536	発災から174分	避難所内での夜間体調不良者新規発生・住民説明の強化要請	避難所職員	○○付近（住所：枚方市楠葉朝日一丁目9、UTM座標：〇〇〇〇〇〇）の避難所で、夜間巡回中に新たな体調不良者（発熱・咳・倦怠感を訴える成人男性1名）が発生。既存の隔離スペースは満床であり、現在は経過観察を行いながら、他の避難者との動線分離を実施している。	新規体調不良者の家族は同避難所内に同伴。夜間のため医療機関搬送は翌朝以降を予定。自治体本部・医療機関には追加報告済み。住民からは『感染拡大が心配』『経過説明をもっと聞きたい』との声も増えている。	標高約12.8m、傾斜1.3%のごく緩やかな低地。淀川氾濫流による長時間浸水域にあり、避難所も低地部のため住民密集・健康リスクが高い。	夜間の避難所運営における体調不良者発生時の現場体制維持、住民説明・安心確保、感染症対策・記録管理の強化訓練。	隔離スペース満床状態が継続し、追加体調不良者が発生。住民説明・不安対応、現場体制維持、感染症対策・記録管理の徹底、翌朝以降の医療搬送計画が訓練ポイント。	新規体調不良者への応急対応と経過観察、動線分離の徹底、健康観察記録・名簿管理の強化、住民・家族への状況説明と安心確保、自治体本部・医療機関への逐次報告、翌朝以降の追加対応計画の準備。	隔離スペースの物理的限界、夜間の人員・医療資材不足、住民・家族の不安増大、体調不良者の重症化リスク、記録管理や名簿更新の遅延、感染拡大防止の徹底困難	3.0m以上5.0m未満の浸水が住宅1階全体・屋根上に継続（24時間以上72時間未満継続予想）	避難所運営・健康被害・感染症対策・夜間対応	避難所での長時間滞在・密集状態により、夜間に体調不良者が引き続き追加発生。既存の隔離スペースがすでに満床で、動線分離や経過観察で対応中。住民・家族の不安や説明要望が高まっており、現場体制維持と記録管理が重要となっている。	夜間も含めた定期的な健康観察・体調管理、感染症対策（隔離・消毒・換気・動線分離）、医療スタッフの夜間シフト体制、衛生資材の十分な備蓄・迅速補給、住民説明・安心確保の体制強化、名簿・健康観察記録の徹底、翌朝以降の追加対応計画。	平成30年7月豪雨（西日本豪雨）岡山県真備町などで、避難所内での感染症疑い・健康急変事案が多発し、夜間の医療体制や衛生資材不足、住民説明体制の課題が指摘された。	['避難所内での健康急変・感染症拡大', '体調不良者の重症化・医療搬送遅延', '名簿管理・安否確認の遅延', '住民の不安・混乱拡大']	['避難所内のパニック・不安拡大', '感染症の集団発生による避難所閉鎖リスク', '医療機関の受入超過・連携遅延', '衛生資材不足による二次的健康被害']
		1-36	751.536	発災から179分	避難所内での夜間体調不良者の追加発生・経過観察体制の継続	避難所職員	○○付近（住所：枚方市楠葉朝日一丁目9、UTM座標：〇〇〇〇〇〇）の避難所で、夜間巡回中に新たな体調不良者（発熱・咳・倦怠感を訴える高齢女性1名）が発生。既存の隔離スペースは満床であり、応急対応後は経過観察と家族・他避難者との動線分離で対応している。	新規体調不良者の家族は同避難所内に同伴。夜間のため医療機関搬送は翌朝以降を予定。自治体本部・医療機関には追加報告済み。住民からは『感染拡大が心配』『経過説明をもっと聞きたい』との声が引き続き寄せられている。	標高約12.8m、傾斜1.3%のごく緩やかな低地。淀川氾濫流による長時間浸水域にあり、避難所も低地部のため住民密集・健康リスクが高い。	夜間の避難所運営における体調不良者追加発生時の現場体制維持、住民説明・安心確保、感染症対策・記録管理の強化訓練。	隔離スペース満床状態が継続し、夜間に追加体調不良者が発生。住民説明・不安対応、現場体制維持、感染症対策・記録管理の徹底、翌朝以降の医療搬送計画が訓練ポイント。	新規体調不良者への応急対応と経過観察、動線分離の徹底、健康観察記録・名簿管理の強化、住民・家族への状況説明と安心確保、自治体本部・医療機関への逐次報告、翌朝以降の医療搬送・体制強化計画の準備。	隔離スペースの物理的限界、夜間の人員・医療資材不足、住民・家族の不安増大、体調不良者の重症化リスク、記録管理や名簿更新の遅延、感染拡大防止の徹底困難	3.0m以上5.0m未満の浸水が住宅1階全体・屋根上に継続（24時間以上72時間未満継続予想）	避難所運営・健康被害・感染症対策・夜間対応	避難所での長時間滞在・密集状態により、夜間に体調不良者が追加発生。既存の隔離スペースが満床で、動線分離や経過観察で対応中。住民・家族の不安や説明要望が高まっており、現場体制維持と記録管理が重要となっている。	夜間も含めた定期的な健康観察・体調管理、感染症対策（隔離・消毒・換気・動線分離）、医療スタッフの夜間シフト体制、衛生資材の十分な備蓄・迅速補給、住民説明・安心確保の体制強化、名簿・健康観察記録の徹底、翌朝以降の追加対応計画。	平成30年7月豪雨（西日本豪雨）岡山県真備町などで、避難所内での感染症疑い・健康急変事案が多発し、夜間の医療体制や衛生資材不足、住民説明体制の課題が指摘された。	['避難所内での健康急変・感染症拡大', '体調不良者の重症化・医療搬送遅延', '名簿管理・安否確認の遅延', '住民の不安・混乱拡大']	['避難所内のパニック・不安拡大', '感染症の集団発生による避難所閉鎖リスク', '医療機関の受入超過・連携遅延', '衛生資材不足による二次的健康被害']
		1-37	751.536	発災から181分	避難所内での夜間体調不良者の新規発生・現場体制の経過観察と住民説明強化（続報）	避難所職員	○○付近（住所：枚方市楠葉朝日一丁目9、UTM座標：〇〇〇〇〇〇）の避難所で、夜間巡回中に新たな体調不良者（発熱・咳・倦怠感を訴える成人男性1名）が発生。隔離スペースは満床のため、応急対応後は家族とともに動線分離し、経過観察を継続している。	新規体調不良者の家族は同避難所内に同伴。夜間のため医療機関搬送は翌朝以降を予定。自治体本部・医療機関への追加報告済み。住民からは『感染拡大が心配』『経過説明をもっと聞きたい』との声が引き続き寄せられている。	標高約12.8m、傾斜1.3%のごく緩やかな低地。淀川氾濫流による長時間浸水域にあり、避難所も低地部のため住民密集・健康リスクが高い。	夜間の避難所運営で体調不良者が継続発生する状況下における現場体制の維持、住民説明・安心確保、感染症対策・経過観察・記録管理の強化訓練。	隔離スペース満床が継続し、追加体調不良者が発生。住民説明・不安対応、現場体制維持、感染症対策・記録管理の徹底、翌朝以降の医療搬送計画が訓練ポイント。	新規体調不良者への応急対応と経過観察、動線分離の徹底、健康観察記録・名簿管理の強化、住民・家族への状況説明と安心確保、自治体本部・医療機関への逐次報告、翌朝以降の医療搬送・体制強化計画の準備。	隔離スペースの物理的限界、夜間の人員・医療資材不足、住民・家族の不安増大、体調不良者の重症化リスク、記録管理や名簿更新の遅延、感染拡大防止の徹底困難	3.0m以上5.0m未満の浸水が住宅1階全体・屋根上に継続（24時間以上72時間未満継続予想）	避難所運営・健康被害・感染症対策・夜間対応	避難所での長時間滞在・密集状態により、夜間に体調不良者が追加発生。既存の隔離スペースが満床で、動線分離や経過観察で対応中。住民・家族の不安や説明要望が高まっており、現場体制維持と記録管理が重要となっている。	夜間も含めた定期的な健康観察・体調管理、感染症対策（隔離・消毒・換気・動線分離）、医療スタッフの夜間シフト体制、衛生資材の十分な備蓄・迅速補給、住民説明・安心確保の体制強化、名簿・健康観察記録の徹底、翌朝以降の追加対応計画。	平成30年7月豪雨（西日本豪雨）岡山県真備町などで、避難所内での感染症疑い・健康急変事案が多発し、夜間の医療体制や衛生資材不足、住民説明体制の課題が指摘された。	['避難所内での健康急変・感染症拡大', '体調不良者の重症化・医療搬送遅延', '名簿管理・安否確認の遅延', '住民の不安・混乱拡大']	['避難所内のパニック・不安拡大', '感染症の集団発生による避難所閉鎖リスク', '医療機関の受入超過・連携遅延', '衛生資材不足による二次的健康被害']

## Sheet: 枚方市楠葉朝日二丁目6
評価	備考	シナリオID	災害の中心からの距離[m]	イベント発生時刻	付与内容	情報源	状況付与内容	補足情報	地形情報や想定想定される被害の特徴	訓練効果・狙い	判断ポイント	期待される対応行動	想定される課題	水位状況	被害の種類	詳細な被害状況	想定される対策	類似の過去事例(あれば記載)	直近のリスク	二次的なリスク
		1-1	755.402	発災から5分	住宅地内歩道の冠水	住民	○○付近（住所：枚方市楠葉朝日二丁目6、UTM座標：〇〇〇〇〇〇）の歩道が水で覆われ始め、子どもや高齢者の通行が危険との通報。自宅前の歩道は5cm程度冠水しており、今後の水位上昇が心配です。	警察には連絡済み。道路名を聞かれた場合：「路線番号はわかりませんが、○○公園の近くの住宅街です。」	標高約12.8m、傾斜1.3%と緩やかな低地。淀川氾濫時には排水が間に合わず、住宅地の歩道や側溝から冠水が始まりやすい。住宅・通学路が多い。	住民への周知、安全確保、歩行者・通学児童の危険回避、現地状況の迅速な把握	淀川氾濫による低地部での歩道冠水。車道より一歩遅れて歩道に被害が出るタイミング。住宅地内での初動情報収集と住民目線での危険周知。	現地の冠水状況の確認、歩行者・児童の安全誘導や通行規制、通学路や生活道路の一時封鎖や迂回案内、住民・学校への情報発信、道路管理者・警察との連携。	歩行者・児童の転倒・感電リスク、通学・通勤時間帯での混乱、情報伝達の遅れ、冠水拡大時の迅速な対応	0.5m以上1.0m未満の冠水が歩道に発生	生活インフラ被害（歩道・通学路冠水）	住宅地内の歩道が冠水し、歩行者や児童の通行が危険となる。今後、車道や住宅敷地への浸水拡大の恐れもある。	歩道・側溝の排水確認、通行規制やバリケード設置、住民・学校への迅速な情報発信、必要に応じて避難指示や通学路変更、道路管理者・警察との連携。	平成30年7月豪雨時、淀川流域の住宅街で歩道・通学路の冠水や通行障害が発生。	['歩行者・児童の転倒・感電事故', '通学・通勤時の混乱や遅延']	['車道や住宅への冠水拡大', '救急・消防車両の通行障害', '地域の一時的孤立化']
		1-2	755.402	発災から9分	住宅地車道の冠水拡大と車両通行規制の開始	警察(110番)	○○付近（住所：枚方市楠葉朝日二丁目6、UTM座標：〇〇〇〇〇〇）の車道が冠水し始め、車両の通行が難しくなってきている。現場の警察官から『路面の大部分が水で覆われ、通行中の車両が徐行を余儀なくされている。今後、通行止めの必要があるため道路管理者への早期引継ぎを希望』との連絡。	歩道の冠水については既に住民から通報あり。道路名を聞かれた場合：「路線番号はわかりませんが、○○公園の近くの住宅街のメイン道路です。」	標高約12.8m、傾斜1.3%と緩やかな低地。淀川氾濫流による排水能力を超えた冠水が住宅地車道に波及しやすい地形。周辺は住宅密集地で車道・歩道ともに浸水しやすい。	住民・ドライバーへの周知、現地交通規制の迅速な実施、道路管理者・警察間の連携訓練	歩道冠水から車道冠水への拡大段階。低地部特有の排水困難な道路で、車両通行規制の初動判断・連携が訓練ポイント。	現地冠水状況の詳細確認、通行規制の即時実施・バリケード設置、住民・ドライバーへの情報発信、道路管理者・警察・消防との連携強化、必要に応じて迂回路案内や避難指示の検討。	通勤・通学時間帯での交通混乱、冠水拡大ペースの把握と規制タイミングの判断、歩行者・自転車の安全確保、情報伝達の遅れによる二次被害	1.0m未満の冠水が車道全体に拡大中	交通インフラ・生活インフラ被害（車道冠水・通行障害）	住宅地内の車道が全面冠水し、車両や自転車の通行が危険・困難となる。今後は車両立ち往生や住宅敷地への浸水拡大リスクも高まる。	現地冠水状況の常時監視、迅速な通行規制・バリケード設置、住民・ドライバーへの情報発信、道路管理者・警察・消防との連携強化、必要に応じて避難指示や迂回路案内、排水路の詰まり除去。	平成30年7月豪雨時、淀川流域の住宅地で車道冠水・車両立ち往生事例多数。	['車両・自転車の立ち往生や水没事故', '通行規制遅延による二次被害']	['住宅敷地への浸水拡大', '救急・消防車両の進入困難', '地域の一時的孤立化']
		1-3	755.402	発災から11分	住宅敷地・玄関先への浸水拡大と住民からの避難判断相談	住民	○○付近（住所：枚方市楠葉朝日二丁目6、UTM座標：〇〇〇〇〇〇）の自宅敷地や玄関先まで水が入り始めた。『家の前の道路や歩道はすでに冠水、玄関先から水が流れ込み始めている。家族で避難すべきかどうか相談したい』との通報。	警察には連絡済み。消防にはまだ連絡していない。道路名を聞かれた場合：「路線番号はわかりませんが、○○公園の近くの住宅街のメイン道路です。」	標高約12.8m、傾斜1.3%のごく緩やかな低地。淀川氾濫流による排水能力を超えた冠水が住宅地道路から敷地・玄関先に波及しやすい地形。周辺は住宅密集地で、低地部特有の排水困難区域。	住民の避難判断・初動避難行動の訓練、浸水拡大時の住民支援・情報発信、行政・消防・警察の連携強化	歩道・車道冠水から敷地・玄関先への浸水段階へ進行。住民が早期に避難判断を下せるか、避難支援・情報提供体制が機能するかが訓練のポイント。	現地の浸水状況の即時確認、住民への避難勧告または指示の発令、要配慮者リストの確認と個別支援、消防・警察・自治体の連携による避難誘導、避難所の案内と開設準備、危険区域のバリケード設置や立入制限、現場情報の継続収集	住民の避難判断の遅れ、高齢者・要配慮者の避難支援の手薄化、床下・床上浸水への急速な進行、現場巡回や安否確認の遅延	1.0m以上1.5m未満の浸水が敷地・玄関先まで拡大	生活インフラ・住宅被害（敷地・玄関先浸水）	住宅敷地や玄関先まで水が流入し、今後床下・床上浸水に進行するリスクが高まっている。住民の避難判断が遅れると人的被害や孤立リスクも増大。家財や車両への被害、電気設備の浸水リスクも顕在化。	住民への早期避難勧告・指示、避難所の迅速な開設・案内、要支援者リストの活用による個別支援、現場巡回とバリケード設置、排水路の詰まり除去、消防・警察・自治体の連携強化	平成30年7月豪雨（西日本豪雨）で淀川流域の住宅地にて同様の敷地・玄関先への浸水拡大事例多数。	['住宅への床下・床上浸水進行', '住民の避難遅延による人的被害', '電気設備・車両の浸水による感電・損傷']	['地域の一時的孤立化', '高齢者・要支援者の避難困難', '浸水拡大による救急・消防車両の進入困難']
		1-4	755.402	発災から16分	住宅1階床下への浸水と避難判断の再相談	住民	○○付近（住所：枚方市楠葉朝日二丁目6、UTM座標：〇〇〇〇〇〇）の自宅で、1階床下まで水が入り始めた。『家族で2階に荷物を運びつつ、避難すべきか再度相談したい。近所の家も同様に水が入ってきている様子』との通報。	消防にも連絡済み。道路名を聞かれた場合：「路線番号はわかりませんが、○○公園の近くの住宅街です。」	標高約12.8m、傾斜1.3%のごく緩やかな低地。淀川氾濫流による排水能力を超えた冠水が住宅地道路から敷地・玄関先、床下へと波及しやすい地形。住宅密集地で排水困難区域。	住民への床下浸水リスク再周知、避難勧告・指示の発令判断、要配慮者支援・安否確認、消防・警察・自治体の連携強化	歩道・車道・敷地への浸水から住宅1階床下への進行段階。住民の避難判断遅延や孤立リスクの顕在化、現場での安否確認・避難支援体制の実効性が訓練の主眼。	現地の床下浸水状況の即時確認、避難勧告または指示の発令、要配慮者リストの確認と個別支援、消防・警察・自治体の連携による避難誘導、避難所の案内と開設準備、危険区域のバリケード設置や立入制限、現場情報の継続収集	住民の避難判断の遅れ、高齢者・要配慮者の避難支援の手薄化、床上浸水への急速な進行、現場巡回や安否確認の遅延、救助隊の到着遅延	1.5m以上2.0m未満の浸水が1階床下に到達	住宅被害（床下浸水）・避難判断遅延	住宅1階床下まで水が入り始め、家財・電気設備への被害が発生。住民の避難判断が遅れれば、床上浸水や孤立リスクが急速に高まる。要配慮者や高齢者の避難支援が急務。	住民への早期避難勧告・指示、要支援者リストによる個別支援、現場巡回と安否確認、消防・警察・自治体の連携による救助・避難体制の強化、危険区域のバリケード設置、避難所の早期開設	平成30年7月豪雨（西日本豪雨）で淀川流域の住宅地にて同様の床下浸水拡大・避難遅延事例多数。岡山県真備町等で避難判断遅れによる被害拡大事例あり。	['住宅の床上浸水進行', '住民の孤立・避難遅延による人的被害', '電気設備・車両の浸水による感電・損傷']	['地域の一時的孤立化', '高齢者・要支援者の避難困難', '浸水拡大による救急・消防車両の進入困難']
		1-5	755.402	発災から21分	住宅1階床上への浸水と住民からの救助要請	住民	○○付近（住所：枚方市楠葉朝日二丁目6、UTM座標：〇〇〇〇〇〇）の自宅で、1階の床上まで水が上がり始め、家族全員が2階へ避難した。周囲の道路はすでに水没しており、外への避難ができないため救助を要請したい。	消防・警察にはすでに連絡済み。道路名を聞かれた場合：「路線番号はわかりませんが、○○公園近くの住宅地です。」	標高約12.8m、傾斜1.3%のごく緩やかな低地。淀川氾濫流による排水能力を超えた冠水が住宅地道路から敷地・玄関先、床下・床上へと波及しやすい地形。住宅密集地で排水困難区域。	床上浸水・住民孤立時の救助要請対応、垂直避難・救助判断訓練、現場情報の即時把握と優先順位付け	床下浸水から床上浸水へ進行し、住民が自力避難困難な孤立状態。現場からの救助要請対応や救助手段（ボート・ヘリ等）の選定、要配慮者支援の優先順位判断が訓練ポイント。	現地の床上浸水・孤立状況の即時確認、住民への安否確認と救助計画の立案、消防・警察・自治体による救助隊派遣、ボートやヘリ等の救助手段の検討、避難所の案内と受入準備、要支援者リストによる優先支援、危険区域の立入制限と周辺住民への情報発信。	救助隊の現場到着遅延、浸水範囲拡大による救助困難化、夜間・悪天候時の救助活動の危険、孤立住民の健康悪化やパニック、救助要請の優先順位付けの難しさ、通信手段の途絶	2.0m以上2.5m未満の浸水が住宅1階床上に到達	住宅被害（床上浸水）・住民孤立	住宅1階まで水が上がり、住民は2階や屋根などに垂直避難。周囲の道路や敷地は完全に水没し、外部への避難・救助が困難。高齢者や要配慮者がいる場合は生命の危険も高まる。	早期の避難指示・勧告、要支援者リストによる個別支援、現場巡回と安否確認、ボート・ヘリ等の救助手段の事前準備、電気・ガスの遮断、危険区域の立入制限、避難所の早期開設と受入体制強化	平成30年7月豪雨（西日本豪雨）で淀川流域の低地住宅地にて同様の床上浸水・孤立事例多数。岡山県真備町や広島県三原市などで救助活動が難航した記録あり。	['住宅の床上浸水による住民の孤立・生命危険', '高齢者・要配慮者の健康悪化', '電気設備の浸水による感電・火災']	['地域の長期的孤立化', '感染症・衛生環境の悪化', '救助活動中の二次災害（流れの強い水中での事故）']
		1-6	755.402	発災から26分	2階・屋根上避難住民からの救助要請（高齢者体調悪化あり）	住民	○○付近（住所：枚方市楠葉朝日二丁目6、UTM座標：〇〇〇〇〇〇）の自宅で、1階が完全に水没し、家族4人が2階および屋根の上で救助を待っている。高齢者1名が体調不良を訴えており、意識がもうろうとしている。周囲は水流が速く、地上からの避難は不可能。	消防・警察には既に通報済み。道路名を聞かれた場合：「路線番号はわかりませんが、○○公園近くの住宅地です。」	標高約12.8m、傾斜1.3%のごく緩やかな低地。淀川氾濫流による排水能力を超えた冠水が住宅地全体に波及しやすく、道路・敷地の水没と孤立化リスクが高い。高台や迂回路がなく、地域全体が浸水域に取り残されやすい。	屋根上・2階避難住民からの救助要請への即応、要配慮者（健康悪化者）への優先対応判断、現場状況の即時把握と救助手段（ボート・ヘリ等）の選定訓練	床上浸水・屋根上避難が発生し、住民からの直接救助要請がある段階。救助要請の優先順位や救助手段の判断、多様な関係機関との連携が訓練ポイント。特に体調不良者がいる場合の優先順位付け。	現地の屋根上・2階避難・孤立状況の即時把握、住民への安否確認と救助計画の立案、ボートやヘリ等の救助手段の準備・出動判断、体調不良者への優先救助、要配慮者リストによる優先支援、避難所の受入体制強化、危険区域の立入制限、関係機関との連携強化。	救助隊の現場到着遅延、屋根上避難者の健康悪化やパニック、浸水範囲拡大による救助活動困難化、夜間・悪天候時の救助活動の危険、通信手段の途絶、救助要請の優先順位付けの難しさ、体調不良者の緊急対応	2.5m以上3.0m未満の浸水が住宅1階全体に拡大、2階・屋根上避難が必要な状況（24時間以上継続予想）	住宅被害（床上浸水・屋根上避難）・住民孤立・救助要請	住宅1階が完全に浸水し、住民は2階や屋根上に避難。周囲の道路や敷地は完全に水没し、外部への避難・救助が困難。高齢者を含む住民から直接救助要請が発生し、体調不良者もおり、迅速な対応が求められる。	早期の避難指示・勧告、要支援者リストによる個別支援、現場巡回と安否確認、ボート・ヘリ等の救助手段の事前準備と迅速な出動、体調不良者の優先救助、電気・ガスの遮断、危険区域の立入制限、避難所の受入体制強化、関係機関との情報共有	平成30年7月豪雨（西日本豪雨）で淀川流域の低地住宅地にて同様の床上浸水・屋根上避難・孤立事例多数。岡山県真備町や広島県三原市などで救助活動が難航した記録あり。	['住宅の床上浸水による住民の孤立・生命危険', '屋根上避難者の健康悪化・転落リスク', '体調不良者の容体急変', '電気設備の浸水による感電・火災']	['地域の長期的孤立化', '感染症・衛生環境の悪化', '救助活動中の二次災害（流れの強い水中での事故）']
		1-7	755.402	発災から34分	屋根上・2階避難住民からの救助要請続報（高齢者容体悪化）	消防	○○付近（住所：枚方市楠葉朝日二丁目6、UTM座標：〇〇〇〇〇〇）の住宅地で、2階および屋根上に避難している住民のうち、体調不良を訴えていた高齢者1名が意識を失ったとの現場消防隊からの報告。現地は水流が依然として強く、地上からの救助は困難。ボートによる救助準備を進めているが、ヘリによる救助要請も検討が必要と判断。	現地周辺から複数の救助要請が継続して入っており、警察・自治体とも情報共有済み。道路名を聞かれた場合：「路線番号はわかりませんが、○○公園近くの住宅地です。」	標高約12.8m、傾斜1.3%のごく緩やかな低地。淀川氾濫流による排水能力を超えた冠水が住宅地全体に波及しやすく、道路・敷地の水没と孤立化リスクが高い。高台や迂回路がなく、地域全体が浸水域に取り残されやすい。	体調急変者への最優先救助判断、複数要救助者への救助手段（ボート・ヘリ等）の迅速な選定、関係機関連携の即時強化、優先順位付け訓練	屋根上・2階避難住民の中から容体急変者が発生し、迅速な救助が必要となる段階。救助優先順位の再検討や、救助手段の多様化（ヘリ要請含む）が訓練のポイント。現場消防・警察・自治体・自衛隊等との連携・情報共有の即時性が問われる。	現場からの詳細な健康状態・人数把握、要配慮者（高齢者・体調不良者）の優先救助計画立案、ボート・ヘリ等の救助手段の迅速な準備・出動判断、住民・関係機関への情報発信、避難所の受入体制強化、危険区域の立入制限、関係機関（警察・消防・自衛隊・自治体）との連携強化	救助隊の現場到着遅延、要救助者の健康状態急変・生命危険、屋根上避難者のパニックや転落リスク、救助要請の優先順位付けの難しさ、通信手段の途絶、救助活動中の二次災害（強い流れによる事故や救助者の安全確保）	3.0m前後の浸水が住宅1階全体、2階・屋根上避難が継続	住宅被害（床上浸水・屋根上避難）・住民孤立・要配慮者健康悪化	住宅1階が完全に浸水し、住民は2階や屋根上に避難。体調急変者が発生し、迅速な救助が必要。周囲の道路や敷地は完全に水没し、地上からの救助は非常に困難。複数世帯で救助要請が続発している。	早期の避難指示・勧告、要支援者リストによる個別支援、現場巡回と安否確認、ボート・ヘリ等の救助手段の迅速な出動、要配慮者の優先救助、電気・ガスの遮断、危険区域の立入制限、避難所の受入体制強化、関係機関との情報共有	平成30年7月豪雨（西日本豪雨）で淀川流域の低地住宅地にて同様の床上浸水・屋根上避難・孤立事例多数。岡山県真備町や広島県三原市などで救助活動が難航した記録あり。	['住宅の床上浸水による住民の孤立・生命危険', '体調急変者の生命リスク', '屋根上避難者の健康悪化・転落リスク', '電気設備の浸水による感電・火災']	['地域の長期的孤立化', '感染症・衛生環境の悪化', '救助活動中の二次災害（流れの強い水中での事故）']
		1-8	755.402	発災から38分	屋根上・2階避難住民の救助活動本格化と現場安全確保要請	消防	○○付近（住所：枚方市楠葉朝日二丁目6、UTM座標：〇〇〇〇〇〇）の住宅地で、屋根上や2階に避難している住民の救助活動を現地消防隊が開始。水流が強く、救助ボートの進入時に流木や瓦礫が多く確認されている。複数の住民が手を振って救助を求めているが、一部住民は移動困難な状況。	現場隊員からの追加要請で、警察による周辺道路の立入規制と、追加の救助ボート・人員の派遣が必要。道路名を聞かれた場合：「路線番号は不明ですが、○○公園近くの住宅地です」。	標高約12.8m、傾斜1.3%のごく緩やかな低地。淀川氾濫流による排水能力を超えた冠水が住宅地全体に波及しやすく、道路・敷地の水没と孤立化リスクが高い。高台や迂回路がなく、地域全体が浸水域に取り残されやすい。	現場安全管理と救助活動の両立、複数要救助者への優先順位判断、関係機関連携訓練、現場状況変化への即応力強化	屋根上・2階避難住民救助の本格化段階。流木・瓦礫等による救助活動の危険性増大、現場安全確保のための警察・消防・自治体の連携、追加資機材・人員要請判断が訓練ポイント。	現場の安全確保（流木・瓦礫除去、立入規制）、救助活動の継続・優先順位付け、追加ボート・人員の派遣、住民への状況説明と安心確保、要配慮者の優先救助、関係機関（警察・消防・自衛隊・自治体）との連携強化。	救助活動中の二次災害（流木衝突・転落事故）、救助隊員の安全確保、現場への追加資機材・人員到着の遅延、住民の不安増大、救助要請の優先順位付けの難しさ、通信手段の途絶	3.0m前後の浸水が住宅1階全体、2階・屋根上避難が継続	住宅被害（床上浸水・屋根上避難）・住民孤立・救助活動中の現場安全リスク	住宅1階全体が浸水し、住民は2階や屋根上に避難。複数世帯で救助要請が続発。現場は流木や瓦礫の漂流が多く、救助ボートの進入時に衝突・転覆等の危険が高まっている。住民の中には体調不良や移動困難者も含まれ、救助活動の優先順位付けと現場安全管理が重要。	早期避難指示・勧告、要支援者リストによる個別支援、現場安全確保（立入規制・流木除去）、追加資機材・人員の迅速派遣、ボート・ヘリ等の救助手段の多様化、危険区域の立入制限、避難所の受入体制強化、関係機関との情報共有・連携	平成30年7月豪雨（西日本豪雨）で淀川流域の低地住宅地にて同様の床上浸水・屋根上避難・孤立事例多数。岡山県真備町等で救助活動中の流木衝突事故や現場隊員の安全確保が課題となった。	['住宅の床上浸水による住民の孤立・生命危険', '流木・瓦礫による救助活動中の隊員・住民の負傷', '屋根上避難者の健康悪化・転落リスク', '電気設備の浸水による感電・火災']	['地域の長期的孤立化', '感染症・衛生環境の悪化', '救助活動中の二次災害（流れの強い水中での事故・資機材損壊）']
		1-9	755.402	発災から43分	救助活動中の現場指揮再調整・追加救助隊要請	消防	○○付近（住所：枚方市楠葉朝日二丁目6、UTM座標：〇〇〇〇〇〇）の住宅地で、屋根上や2階に避難している住民への救助活動を続行中。現場では流木や瓦礫の増加により、進入していた救助ボートの一部が一時的に活動を中断せざるを得ない状況となった。現場指揮隊より『安全確保のため一部隊を一時退避させ、追加の救助ボート・資機材・人員の派遣を要請したい』との連絡。	現場では複数の住民が依然として屋根上・2階で救助を待っている。周辺道路は全域冠水し、陸路での接近は困難。道路名を聞かれた場合：「路線番号は不明ですが、○○公園近くの住宅地です」。	標高約12.8m、傾斜1.3%のごく緩やかな低地。淀川氾濫流による排水能力を超えた冠水が住宅地全体に波及しやすく、道路・敷地の水没と孤立化リスクが高い。高台や迂回路がなく、地域全体が浸水域に取り残されやすい。	救助活動中の現場指揮再調整、追加資機材・人員要請判断、現場の安全確保と継続的救助活動の両立訓練	流木・瓦礫の増加により救助活動の危険性がさらに高まった状況で、現場指揮系統の再調整や追加救助隊派遣の判断が訓練ポイント。現場安全確保と住民救助のバランスが問われる。	現場の安全状況再評価、救助活動の一時中断・再開判断、追加救助隊・資機材の派遣要請、現場指揮系統の明確化、住民・関係機関への情報共有、救助要請住民の優先順位付け、警察・自衛隊等との連携強化	救助活動中の二次災害（流木衝突・転覆事故）リスク増大、現場隊員・住民の安全確保、追加資機材・人員到着の遅延、現場混乱・指揮系統の乱れ、住民の不安増大、通信手段の一時途絶	3.0m前後の浸水が住宅1階全体、2階・屋根上避難が継続（24時間以上継続予想）	住宅被害（床上浸水・屋根上避難）・住民孤立・救助活動中の現場安全リスク・救助活動遅延	住宅1階全体が浸水し、住民は2階や屋根上に避難。救助活動中に流木・瓦礫の増加で救助隊の安全確保が困難となり、一部活動を中断。追加の救助隊・資機材が必要な状況。住民の中には体調不良や移動困難者も含まれる。	現場安全確保（立入規制・流木除去）、追加資機材・人員の迅速派遣、現場指揮系統の明確化、ボート・ヘリ等の救助手段の多様化、住民への状況説明と安心確保、危険区域の立入制限、関係機関との情報共有・連携	平成30年7月豪雨（西日本豪雨）で淀川流域の低地住宅地にて同様の床上浸水・屋根上避難・孤立事例多数。岡山県真備町等で救助活動中の流木衝突事故や現場隊員の安全確保が課題となった。	['住宅の床上浸水による住民の孤立・生命危険', '流木・瓦礫による救助活動中の隊員・住民の負傷', '屋根上避難者の健康悪化・転落リスク', '救助活動の一時中断・遅延']	['地域の長期的孤立化', '感染症・衛生環境の悪化', '救助活動中の二次災害（流れの強い水中での事故・資機材損壊）']
		1-10	755.402	発災から46分	救助活動の一時中断と現場安全再評価	消防	○○付近（住所：枚方市楠葉朝日二丁目6、UTM座標：〇〇〇〇〇〇）の住宅地で、屋根上や2階に避難している住民への救助活動中、現場指揮隊より『流木や瓦礫の増加、水流の激化により救助ボートの追加出動が危険と判断し、一時的に活動を中断。現場の安全状況を再評価し、必要に応じて追加の救助隊・資機材の派遣を要請したい』との連絡。	現場では複数の住民が依然として屋根上・2階で救助を待っている。警察・自治体には既に情報共有済み。道路名を聞かれた場合：「路線番号は不明ですが、○○公園近くの住宅地です」。	標高約12.8m、傾斜1.3%のごく緩やかな低地。淀川氾濫流による排水能力を超えた冠水が住宅地全体に波及しやすく、道路・敷地の水没と孤立化リスクが高い。高台や迂回路がなく、地域全体が浸水域に取り残されやすい。	救助活動中の現場安全再評価、追加資機材・人員要請判断、現場の安全確保と継続的救助活動の両立訓練	救助活動中の二次災害リスクを受け、現場指揮隊が安全を最優先して一時活動を中断。現場安全確保と住民救助のバランス、追加救助隊派遣の判断が訓練ポイント。	現場の安全状況再評価、救助活動の一時中断・再開判断、追加救助隊・資機材の派遣要請、現場指揮系統の明確化、住民・関係機関への情報共有、救助要請住民の優先順位付け、警察・自衛隊等との連携強化。	救助活動中の二次災害リスク増大、現場隊員・住民の安全確保、追加資機材・人員到着の遅延、現場混乱・指揮系統の乱れ、住民の不安増大、通信手段の一時途絶	3.0m前後の浸水が住宅1階全体、2階・屋根上避難が継続（24時間以上継続予想）	住宅被害（床上浸水・屋根上避難）・住民孤立・救助活動遅延	住宅1階全体が浸水し、住民は2階や屋根上に避難。救助活動中に流木・瓦礫の増加で救助隊の安全確保が困難となり、一部活動を中断。追加の救助隊・資機材が必要な状況。住民の中には体調不良や移動困難者も含まれる。	現場安全確保（立入規制・流木除去）、追加資機材・人員の迅速派遣、現場指揮系統の明確化、ボート・ヘリ等の救助手段の多様化、住民への状況説明と安心確保、危険区域の立入制限、関係機関との情報共有・連携	平成30年7月豪雨（西日本豪雨）で淀川流域の低地住宅地にて同様の床上浸水・屋根上避難・孤立事例多数。岡山県真備町等で救助活動中の流木衝突事故や現場隊員の安全確保が課題となった。	['住宅の床上浸水による住民の孤立・生命危険', '流木・瓦礫による救助活動中の隊員・住民の負傷', '屋根上避難者の健康悪化・転落リスク', '救助活動の一時中断・遅延']	['地域の長期的孤立化', '感染症・衛生環境の悪化', '救助活動中の二次災害（流れの強い水中での事故・資機材損壊）']
		1-11	755.402	発災から51分	救助活動再開に向けた追加資機材・人員要請と現場安全対策強化	消防	○○付近（住所：枚方市楠葉朝日二丁目6、UTM座標：〇〇〇〇〇〇）の住宅地にて、現場指揮隊より『流木や瓦礫の漂流が依然多く、救助ボートの安全な進入のため追加の救命胴衣・救助用ロープ・人員の派遣を要請したい。また、現場安全対策を強化しながら救助活動の再開準備を進める』との連絡。	現場は警察・自治体・自衛隊と情報共有済み。道路名を聞かれた場合：「路線番号は不明ですが、○○公園近くの住宅地です」。	標高約12.8m、傾斜1.3%のごく緩やかな低地。淀川氾濫流による排水能力を超えた冠水が住宅地全体に波及しやすく、道路・敷地の水没と孤立化リスクが高い。高台や迂回路がなく、地域全体が浸水域に取り残されやすい。	現場安全確保と救助活動の再開判断、追加資機材・人員要請訓練、関係機関連携の強化、現場状況変化への即応力養成	現場安全再評価後、追加資機材・人員要請と現場安全対策強化による救助活動再開準備。関係機関連携・現場状況変化への即応が訓練ポイント。	現場の安全状況再評価、必要資機材・人員の迅速な派遣要請、現場指揮本部との連携、住民・関係機関への状況説明、救助活動再開のタイミング判断、救助要請住民の優先順位付け、警察・自衛隊等との連携強化。	追加資機材・人員到着までの救助活動制限、現場安全確保の徹底、関係機関連携の遅れ、住民の不安増大、通信手段の維持	3.0m前後の浸水が住宅1階全体、2階・屋根上避難が継続（24時間以上継続予想）	住宅被害（床上浸水・屋根上避難）・住民孤立・救助活動再開準備	住宅1階全体が浸水し、住民は2階や屋根上に避難。救助活動は現場安全確保のため一時中断中だったが、追加救助隊・資機材の要請と現場安全対策強化により救助活動再開の準備が進められている。住民の中には体調不良や移動困難者も含まれる。	現場安全確保（立入規制・流木除去）、追加資機材・人員の迅速派遣、現場指揮本部との連携強化、救助手段の多様化、住民への状況説明と安心確保、危険区域の立入制限、関係機関との情報共有・連携	平成30年7月豪雨（西日本豪雨）で淀川流域の低地住宅地にて同様の床上浸水・屋根上避難・孤立事例多数。岡山県真備町等で救助活動中の流木衝突事故や現場隊員の安全確保が課題となった。	['住宅の床上浸水による住民の孤立・生命危険', '流木・瓦礫による救助活動中の隊員・住民の負傷', '屋根上避難者の健康悪化・転落リスク', '救助活動の一時中断・遅延']	['地域の長期的孤立化', '感染症・衛生環境の悪化', '救助活動中の二次災害（流れの強い水中での事故・資機材損壊）']
		1-12	755.402	発災から56分	救助活動再開と住民への現場状況説明・安心確保	消防	○○付近（住所：枚方市楠葉朝日二丁目6、UTM座標：〇〇〇〇〇〇）の住宅地で、追加の救助ボートや救助用資機材が到着し、現場指揮本部の指示のもとで救助活動が再開された。現場では複数の住民が屋根上や2階で救助を待機しており、現場隊員が住民に現状や今後の救助方針について説明・声掛けを実施中。	現場は流木や瓦礫の漂流が続き、救助活動は安全確認を徹底しながら段階的に再開。警察・自衛隊とも連携中。道路名を聞かれた場合：「路線番号は不明ですが、○○公園近くの住宅地です」。	標高約12.8m、傾斜1.3%のごく緩やかな低地。淀川氾濫流による排水能力を超えた冠水が住宅地全体に波及しやすく、道路・敷地の水没と孤立化リスクが高い。高台や迂回路がなく、地域全体が浸水域に取り残されやすい。	現場指揮本部主導による救助活動再開、住民への状況説明・安心確保、関係機関との連携強化訓練	現場安全対策を講じたうえでの救助活動再開段階。追加資機材・人員投入後、指揮命令系統のもとで住民救助を効率的に進める。住民への状況説明や安心確保のコミュニケーションも重視。	現場指揮本部の指示に基づく救助活動の再開、住民への状況説明・声掛け、要配慮者の優先救助、現場安全確認の継続、関係機関（警察・自衛隊・自治体）との連携強化、救助活動の進捗報告。	流木・瓦礫による救助活動の危険、住民の不安増大、追加資機材の運用調整、現場指揮系統の混乱防止、通信手段維持の困難	3.0m以上5.0m未満の浸水が住宅1階全体・屋根上に継続（24時間以上72時間未満継続予想）	住宅被害（床上浸水・屋根上避難）・住民孤立・救助活動再開	住宅1階全体が浸水し、住民は2階や屋根上に避難。現場指揮本部の設置・追加資機材の到着により、救助活動が再開。住民の中には体調不良や移動困難者も含まれ、現場では住民への状況説明や安心確保のための声掛けが行われている。	現場安全確保（立入規制・流木除去）、追加資機材・人員の迅速運用、現場指揮本部による指揮系統強化、住民への状況説明・安心確保、要配慮者の優先救助、危険区域の立入制限、関係機関との情報共有・連携	平成30年7月豪雨（西日本豪雨）で淀川流域の低地住宅地にて同様の床上浸水・屋根上避難・孤立事例多数。岡山県真備町等で救助活動再開時の現場安全管理や住民対応が課題となった。	['住宅の床上浸水による住民の孤立・生命危険', '流木・瓦礫による救助活動中の隊員・住民の負傷', '屋根上避難者の健康悪化・転落リスク', '救助活動中の現場混乱・指揮系統の乱れ']	['地域の長期的孤立化', '感染症・衛生環境の悪化', '救助活動中のさらなる二次災害（流れの強い水中での事故・資機材損壊）']
		1-13	755.402	発災から61分	住民救助の継続と現場応急医療対応開始	消防	○○付近（住所：枚方市楠葉朝日二丁目6、UTM座標：〇〇〇〇〇〇）の住宅地で、救助活動が継続中。救助ボートで救出された住民の一部に体調不良（低体温症や脱水症状等）が見られ、現場で応急手当班による医療対応が開始された。	救助対象住民には高齢者や持病持ちが含まれている。警察・自衛隊・医療機関とも情報共有済み。道路名を聞かれた場合：「路線番号は不明ですが、○○公園近くの住宅地です」。	標高約12.8m、傾斜1.3%のごく緩やかな低地。淀川氾濫流による排水能力を超えた冠水が住宅地全体に波及しやすく、道路・敷地の水没と孤立化リスクが高い。高台や迂回路がなく、地域全体が浸水域に取り残されやすい。	住民救助活動の実動訓練と現場応急医療対応、要配慮者の救命優先、関係機関連携の強化、救助後の住民ケア体制の確認	救助活動再開後、住民の救出が順次進行し、救助後の現場応急手当や医療搬送判断が必要となる段階。高齢者・要配慮者への現場医療対応や、救助活動と医療体制の連携強化が訓練のポイント。	救助活動の継続・進捗管理、救出住民の健康状態確認と応急手当、要配慮者の医療機関搬送判断、現場安全確認、警察・自衛隊・医療機関との連携、住民への状況説明・安心確保、救助活動記録・報告	救助住民の健康悪化や搬送遅延、現場医療資機材の不足、救助活動中の安全確保、住民のパニックや不安拡大、通信手段の維持、関係機関連携の遅れ	3.0m以上5.0m未満の浸水が住宅1階全体・屋根上に継続（24時間以上72時間未満継続予想）	住宅被害（床上浸水・屋根上避難）・住民孤立・救助活動・応急医療対応	住宅1階全体が浸水し、住民は2階や屋根上に避難していたが、救助活動再開により順次救出。長時間の孤立や浸水による低体温症・脱水・持病悪化等が複数発生し、現場で応急手当や医療搬送判断が必要となっている。	早期避難指示・勧告、要支援者リストによる個別支援、現場応急手当班の配置、医療機関との連携体制強化、救助活動中の安全管理、住民への状況説明・安心確保、関係機関との情報共有・連携	平成30年7月豪雨（西日本豪雨）岡山県真備町で床上浸水・屋根上避難・孤立住民の救助後、現場での応急手当や医療搬送が多数発生した事例あり。	['住宅の床上浸水による住民の孤立・生命危険', '救助住民の体調悪化・低体温症・持病の急変', '救助活動中の隊員・住民の負傷']	['感染症・衛生環境の悪化', '救助活動中のさらなる二次災害（流木衝突・感電等）', '医療搬送の遅延による健康被害']
		1-14	755.402	発災から67分	救助住民の医療機関搬送調整と家族・住民への安否説明	消防	○○付近（住所：枚方市楠葉朝日二丁目6、UTM座標：〇〇〇〇〇〇）の現場救護所で、救助された住民のうち体調不良や持病悪化が認められる複数名について、現場から医療機関への搬送調整が始まった。現場には家族や近隣住民が安否確認や搬送状況の説明を求めて集まりつつある。	搬送対象住民には高齢者・持病持ち・低体温症の方が含まれる。現場救護所から医療機関までの搬送ルート確保が課題。警察・自衛隊・医療機関と連携中。道路名を聞かれた場合：「路線番号は不明ですが、○○公園近くの住宅地です」。	標高約12.8m、傾斜1.3%のごく緩やかな低地。淀川氾濫流による排水能力を超えた冠水が住宅地全体に波及しやすく、道路・敷地の水没と孤立化リスクが高い。高台や迂回路がなく、地域全体が浸水域に取り残されやすい。	広域搬送体制の訓練、医療機関との連携、搬送優先順位判断、現場～搬送先間の情報伝達・調整、住民・家族への説明体制の確認	現場応急手当後の住民広域搬送段階。救助活動の終息に向けて、医療機関との連携・搬送ルート確保・搬送優先順位判断・現場～搬送先間の情報共有、住民・家族への説明体制強化が訓練のポイント。	搬送対象者の優先順位付け、救急車・ドクターヘリ等の搬送手段調整、搬送ルートの安全確認、現場から医療機関への情報連携、住民・家族への説明、搬送記録の作成、関係機関との連携強化。	搬送対象者多数による優先順位判断の難しさ、搬送ルートの冠水・障害物による遅延、救急車・ヘリの運用調整、医療機関の受入体制調整、住民・家族の不安増大、現場と搬送先間の情報伝達遅延	3.0m以上5.0m未満の浸水が住宅1階全体・屋根上に継続（24時間以上72時間未満継続予想）	住宅被害（床上浸水・屋根上避難）・住民孤立・救助活動・広域医療搬送	住宅1階全体が浸水し、住民は2階や屋根上に避難していたが、救助活動再開により順次救出。長時間の孤立や浸水による低体温症・脱水・持病悪化等が複数発生し、現場で応急手当や医療搬送判断が必要となっている。家族や近隣住民からの安否確認や搬送状況の問い合わせも増加している。	早期避難指示・勧告、要支援者リストによる個別支援、現場応急手当班・医療機関との連携体制強化、搬送ルートの事前確保・安全確認、搬送優先順位判断基準の整備、住民・家族への説明体制強化、関係機関との情報共有・連携	平成30年7月豪雨（西日本豪雨）岡山県真備町で床上浸水・屋根上避難・孤立住民の救助後、現場からの広域医療搬送が多数発生し、搬送ルートの冠水・渋滞・現場～搬送先間の連携が課題となった事例あり。	['住宅の床上浸水による住民の孤立・生命危険', '救助住民の体調悪化・低体温症・持病の急変', '救助活動中の隊員・住民の負傷']	['感染症・衛生環境の悪化', '救助活動中のさらなる二次災害（流木衝突・感電等）', '医療搬送の遅延による健康被害']
		1-15	755.402	発災から73分	救助活動終息に向けた現場撤収準備と最終安否確認	消防	○○付近（住所：枚方市楠葉朝日二丁目6、UTM座標：〇〇〇〇〇〇）の住宅地で、救助活動がほぼ完了し、現場指揮本部より『残る住民の最終安否確認と、救助隊・資機材の安全な撤収準備を開始する』との通達。現場では一部住民の所在確認が続いているが、多数の住民は既に搬送・避難済み。	安否不明住民の中には連絡が取れない方が数名含まれる。警察・自衛隊・医療機関と引き続き連携。道路名を聞かれた場合：「路線番号は不明ですが、○○公園近くの住宅地です」。	標高約12.8m、傾斜1.3%のごく緩やかな低地。淀川氾濫流による排水能力を超えた冠水が住宅地全体に波及しやすく、道路・敷地の水没と孤立化リスクが高い。高台や迂回路がなく、地域全体が浸水域に取り残されやすい。	救助活動終息段階での住民安否確認・行方不明者捜索、現場撤収判断、関係機関連携体制の確認訓練	救助活動の終息に伴い、全住民の安否確認・行方不明者捜索、現場隊員・資機材の安全な撤収を段階的に進める。現場指揮本部・関係機関の連携・情報共有が重要な訓練ポイント。	残る住民の安否確認、行方不明者の捜索・情報収集、現場資機材の撤収準備、関係機関との撤収調整、住民・家族への状況説明、撤収後の現場安全管理（立入規制等）、活動記録・報告作成。	安否不明住民の捜索難航、現場撤収中の安全確保、資機材損耗・紛失、住民・家族の不安増大、現場と本部間の情報伝達遅延	3.0m以上5.0m未満の浸水が住宅1階全体・屋根上に継続（24時間以上72時間未満継続予想）	住宅被害（床上浸水・屋根上避難）・住民孤立・救助活動終息・安否確認・現場撤収	住宅1階全体が長時間浸水し、住民は2階や屋根上に避難していた。救助活動・広域搬送がほぼ完了し、現場では安否不明住民の捜索と残留者の確認、撤収準備が進行中。現場の安全管理と情報共有が重要。	早期避難指示・勧告、要支援者リストによる個別支援、現場応急手当班・医療機関との連携体制強化、撤収時の安全管理、安否確認・行方不明者捜索の徹底、住民・家族への説明体制強化、関係機関との情報共有・連携	平成30年7月豪雨（西日本豪雨）岡山県真備町で床上浸水・屋根上避難・孤立住民の救助活動終息後、安否確認・撤収段階での捜索・情報共有・住民対応が重要課題となった事例あり。	['安否不明住民の生命危険', '撤収作業中の隊員・住民の安全リスク', '現場撤収遅延・資機材損耗']	['感染症・衛生環境の悪化', '住民・家族の不安増大', '現場と本部間の情報伝達遅延']
		1-16	755.402	発災から76分	現場撤収・活動記録整理と住民・家族への最終状況説明	消防	○○付近（住所：枚方市楠葉朝日二丁目6、UTM座標：〇〇〇〇〇〇）の住宅地で、救助活動・安否確認が完了し、現場指揮本部より『救助隊・資機材の撤収作業を本格開始。現場活動記録と住民・家族への最終状況説明を実施する』との通達。	撤収作業中も住民や家族から状況確認の問い合わせが続いている。警察・自衛隊・医療機関と連携し、最終的な住民名簿・安否リストを整理中。道路名を聞かれた場合：「路線番号は不明ですが、○○公園近くの住宅地です」。	標高約12.8m、傾斜1.3%のごく緩やかな低地。淀川氾濫流による排水能力を超えた冠水が住宅地全体に波及しやすく、道路・敷地の水没と孤立化リスクが高い。高台や迂回路がなく、地域全体が浸水域に取り残されやすい。	救助活動終息後の撤収・記録整理、住民・家族への説明体制、現場の安全管理・情報共有の確認訓練	救助活動が完全に終息し、撤収・記録整理・住民対応の最終段階。住民・家族への説明や現場安全管理、関係機関連携の確認が訓練ポイント。	撤収作業の安全管理、資機材の点検・整理、住民・家族への最終説明・状況報告、安否確認リストの確定・共有、現場の立入規制・安全措置、活動記録・報告書の作成、関係機関との最終調整。	撤収作業中の事故・負傷、資機材の紛失・損傷、住民・家族への説明対応の遅延、安否確認リストの整合性確保、現場と本部間の情報伝達遅延	3.0m以上5.0m未満の浸水が住宅1階全体・屋根上に継続（24時間以上72時間未満継続予想）	住宅被害（床上浸水・屋根上避難）・住民孤立・救助活動終息・撤収・記録整理	住宅1階全体が長時間浸水し、住民は2階や屋根上に避難していた。救助活動・広域搬送・安否確認が完了し、現場では資機材撤収・記録整理・住民対応が進行中。現場の安全管理と住民・家族への説明が中心課題。	撤収時の安全管理、活動記録の正確な作成、住民・家族への説明体制強化、安否確認リストの整合性確保、関係機関との情報共有・連携、現場の立入規制・安全措置	平成30年7月豪雨（西日本豪雨）岡山県真備町で床上浸水・屋根上避難・孤立住民の救助活動終息後、撤収・記録整理・住民対応が重要課題となった事例あり。	['撤収作業中の隊員・住民の安全リスク', '資機材の紛失・損傷', '住民・家族への説明対応の遅延']	['感染症・衛生環境の悪化', '住民・家族の不安増大', '現場と本部間の情報伝達遅延']
		1-17	755.402	発災から82分	撤収作業の最終段階・活動記録の最終整理と住民・家族への最終説明対応	消防	○○付近（住所：枚方市楠葉朝日二丁目6、UTM座標：〇〇〇〇〇〇）の住宅地で、現場指揮本部より『救助隊・資機材の撤収作業が最終段階に入り、活動記録や安否確認リストの最終整理、住民・家族への最終状況説明を実施する』との通達。現場では住民・家族への状況説明や、警察・自衛隊・医療機関など関係機関との撤収タイミング調整も進行中。	撤収作業はほぼ完了しているが、住民や家族からの状況確認問い合わせが継続。警察・自衛隊・医療機関と連携し、住民名簿・安否リストの最終確定を進行中。道路名を聞かれた場合：「路線番号は不明ですが、○○公園近くの住宅地です」。	標高約12.8m、傾斜1.3%のごく緩やかな低地。淀川氾濫流による排水能力を超えた冠水が住宅地全体に波及しやすく、道路・敷地の水没と孤立化リスクが高い。高台や迂回路がなく、地域全体が浸水域に取り残されやすい。	撤収段階での記録整理・安否確認体制の最終確認、住民・家族への説明体制、現場管理・情報共有の徹底訓練	現場活動が完全に終息し、撤収・記録整理・安否確認の最終段階。現場管理や住民・家族への説明、関係機関連携・情報伝達の正確性が訓練ポイント。	安否確認リスト・活動記録の確定・本部提出、現場立入規制の再確認、資機材の最終点検・搬出、住民・家族への最終説明・状況報告、関係機関との撤収・現場管理の調整、活動報告書の作成。	撤収作業中の事故・負傷、資機材の紛失・損傷、住民・家族への説明対応の遅延、安否確認リストや活動記録の整合性確保、関係機関との調整遅延、現場と本部間の情報伝達遅延	3.0m以上5.0m未満の浸水が住宅1階全体・屋根上に継続（24時間以上72時間未満継続予想）	住宅被害（床上浸水・屋根上避難）・住民孤立・救助活動終息・撤収・記録整理	住宅1階全体が長時間浸水し、住民は2階や屋根上に避難していた。救助活動・広域搬送・安否確認が完了し、現場では資機材撤収・記録整理・住民対応が進行中。現場の安全管理と住民・家族への説明が中心課題。	撤収時の安全管理、活動記録の正確な作成、住民・家族への説明体制強化、安否確認リストの整合性確保、関係機関との情報共有・連携、現場の立入規制・安全措置	平成30年7月豪雨（西日本豪雨）岡山県真備町で床上浸水・屋根上避難・孤立住民の救助活動終息後、撤収・記録整理・住民対応が重要課題となった事例あり。	['撤収作業中の隊員・住民の安全リスク', '資機材の紛失・損傷', '住民・家族への説明対応の遅延']	['感染症・衛生環境の悪化', '住民・家族の不安増大', '現場と本部間の情報伝達遅延']
		1-18	755.402	発災から89分	現場閉鎖・管理引継ぎと問い合わせ対応窓口の設置	消防	○○付近（住所：枚方市楠葉朝日二丁目6、UTM座標：〇〇〇〇〇〇）の住宅地にて、現場指揮本部より『全ての救助・安否確認・資機材撤収作業が完了し、現場は正式に閉鎖。今後は必要な関係機関への現場管理の引継ぎと、住民・家族への最終状況説明および問い合わせ対応を実施する』との通達。	現地では撤収後も住民や家族からの問い合わせが断続的に続いているため、問い合わせ窓口を設置。警察・自衛隊・医療機関と最終的な現場管理の引継ぎ調整を行う。道路名を聞かれた場合：「路線番号は不明ですが、○○公園近くの住宅地です」。	標高約12.8m、傾斜1.3%のごく緩やかな低地。淀川氾濫流による排水能力を超えた冠水が住宅地全体に波及しやすく、道路・敷地の水没と孤立化リスクが高い。高台や迂回路がなく、地域全体が浸水域に取り残されやすい。	救助・撤収作業の完全終息と現場閉鎖、現場管理の円滑な引継ぎ、住民・家族への最終説明体制の確認訓練	全作業完了後の現場閉鎖・管理引継ぎ。住民・家族への説明、問い合わせ対応、関係機関間の連携・情報共有の最終確認が訓練ポイント。	現場閉鎖の宣言、現場管理の関係機関（警察・自衛隊等）への正式な引継ぎ、問い合わせ窓口の設置・運用、住民・家族への最終状況説明、活動記録・報告書の本部提出、現場立入規制の維持。	現場閉鎖後の住民・家族からの問い合わせ対応遅延、現場管理引継ぎの不備、資機材や記録の紛失、現場立入規制の徹底不足、関係機関間の情報伝達の行き違い	3.0m以上5.0m未満の浸水が住宅1階全体・屋根上に継続（24時間以上72時間未満継続予想）	住宅被害（床上浸水・屋根上避難）・住民孤立・救助活動終息・撤収・現場閉鎖	住宅1階全体が長時間浸水し、住民は2階や屋根上に避難していた。救助・搬送・安否確認・撤収作業が全て完了し、現場は閉鎖。今後は現場管理の関係機関への引継ぎと住民・家族への最終説明が必要。	撤収時の安全管理、現場管理の正式な引継ぎ体制、住民・家族への説明体制強化、問い合わせ窓口の設置、活動記録の正確な提出、現場立入規制の徹底、関係機関との情報共有	平成30年7月豪雨（西日本豪雨）岡山県真備町で床上浸水・屋根上避難・孤立住民の救助活動終息後、現場閉鎖・管理引継ぎ・住民対応が重要課題となった事例あり。	['現場閉鎖後の管理不備による安全リスク', '住民・家族への説明対応の遅延', '現場立入規制の徹底不足']	['感染症・衛生環境の悪化', '住民・家族の不安増大', '現場と本部間の情報伝達遅延']
		1-19	755.402	発災から93分	現場閉鎖後の住民・家族からの追加問い合わせと最終対応	住民	○○付近（住所：枚方市楠葉朝日二丁目6、UTM座標：〇〇〇〇〇〇）の家族や親族から、『救助された家族の所在が分からない』『避難所で会えない』『現場の立入や安全状況を教えてほしい』などの問い合わせが災害対策本部や現場管理窓口に寄せられている。	現場管理は消防から警察・自治体に引き継がれており、問い合わせ窓口は市役所災害対策本部で継続運用中。避難所や安否確認リストは本部で一元管理。現場の立入は規制中。	標高約12.8m、傾斜1.3%のごく緩やかな低地。淀川氾濫流による排水能力を超えた冠水が住宅地全体に波及しやすく、道路・敷地の水没と孤立化リスクが高い。高台や迂回路がなく、地域全体が浸水域に取り残されやすい。	現場閉鎖後の住民・家族対応、問い合わせ窓口運用訓練、安否確認リスト・避難所情報の一元管理・情報伝達体制の確認	救助・撤収作業が全て完了し現場閉鎖後、住民や家族から問い合わせが継続的に発生する状況を想定。問い合わせ窓口の設置・運用や、安否確認リスト・避難所情報の一元管理・情報伝達が訓練のポイント。	問い合わせ窓口での丁寧な対応、安否確認リストや避難所情報の確認・案内、現場立入規制や安全状況の説明、問い合わせ内容の記録、必要に応じて関係機関への連絡・調整。	問い合わせ件数の増加による対応遅延、情報伝達の行き違い、現場閉鎖後の立入希望者対応、安否確認リストの整合性維持、住民・家族の不安や混乱の拡大	3.0m以上5.0m未満の浸水が住宅1階全体・屋根上に継続（24時間以上72時間未満継続予想）	住宅被害（床上浸水・屋根上避難）・住民孤立・現場閉鎖後の住民対応	住宅1階全体が長時間浸水し、住民は2階や屋根上に避難していた。救助・搬送・安否確認・撤収作業が全て完了し現場は閉鎖されたが、住民や家族からの安否や現場状況に関する問い合わせが続いている。現場管理は関係機関へ引継ぎ済み。	撤収後の問い合わせ窓口設置・運用、安否確認リスト・避難所情報の一元管理、現場立入規制の徹底、住民・家族への丁寧な説明体制、関係機関との情報共有、活動記録・問い合わせ記録の整備	平成30年7月豪雨（西日本豪雨）岡山県真備町などで、救助活動終息・現場閉鎖後も住民や家族からの問い合わせが殺到し、安否確認・情報提供体制の整備が課題となった事例あり。	['現場閉鎖後の管理不備による安全リスク', '住民・家族への説明対応の遅延', '安否確認リストの整合性不備']	['住民・家族の不安増大', '現場立入規制の徹底不足', '現場と本部間の情報伝達遅延']
		1-20	755.402	発災から97分	現場閉鎖後の追加問い合わせおよび最終状況整理	自治体職員	○○付近（住所：枚方市楠葉朝日二丁目6、UTM座標：〇〇〇〇〇〇）の現場閉鎖後、災害対策本部や問い合わせ窓口に『救助された家族の安否や搬送先、避難所での所在が分からない』『現場の立入可能時期や安全状況を知りたい』といった問い合わせが継続的に寄せられている。安否確認リストや避難所名簿との照合・整理が必要な状況。	現場管理は既に消防から警察・自治体に引き継がれており、問い合わせ窓口は市役所災害対策本部で運用中。避難所や安否確認リストは本部で一元管理。現場の立入は引き続き規制中。避難所には新たな住民の追加来所情報もあり。	標高約12.8m、傾斜1.3%のごく緩やかな低地。淀川氾濫流による排水能力を超えた冠水が住宅地全体に波及しやすく、道路・敷地の水没と孤立化リスクが高い。高台や迂回路がなく、地域全体が浸水域に取り残されやすい。	現場閉鎖後の住民・家族対応、問い合わせ窓口体制の運用訓練、避難所名簿・安否確認リストの整合・再整理、住民・家族への説明体制強化	救助・撤収・現場閉鎖後も住民や家族からの問い合わせが継続。問い合わせ窓口の運用、名簿・安否確認リストの一元管理・整合性確保、住民・家族への説明・安心確保が訓練のポイント。	問い合わせ窓口での丁寧な対応、安否確認リストや避難所情報の照合・案内、現場立入規制や安全状況の説明、問い合わせ内容の記録、名簿不一致時の追加確認・調整、必要に応じて関係機関への連絡・調整。	問い合わせ件数の増加による対応遅延、名簿と安否確認リストの不一致・照合遅延、情報伝達の行き違い、現場閉鎖後の立入希望者対応、住民・家族の不安や混乱の拡大	3.0m以上5.0m未満の浸水が住宅1階全体・屋根上に継続（24時間以上72時間未満継続予想）	住宅被害（床上浸水・屋根上避難）・住民孤立・現場閉鎖後の住民・家族対応	住宅1階全体が長時間浸水し、住民は2階や屋根上に避難していた。救助・搬送・安否確認・撤収作業が全て完了し現場は閉鎖されたが、住民や家族からの安否や現場状況に関する問い合わせが続いている。避難所への新規来所住民もあり、名簿・安否確認リストの照合が必要。	撤収後の問い合わせ窓口設置・運用、安否確認リスト・避難所情報の一元管理、現場立入規制の徹底、住民・家族への丁寧な説明体制、名簿・リストの整合性確保、関係機関との情報共有、活動記録・問い合わせ記録の整備	平成30年7月豪雨（西日本豪雨）岡山県真備町などで、救助活動終息・現場閉鎖後も住民や家族からの問い合わせが殺到し、安否確認・情報提供体制の整備が課題となった事例あり。	['現場閉鎖後の管理不備による安全リスク', '住民・家族への説明対応の遅延', '名簿・安否確認リストの整合性不備']	['住民・家族の不安増大', '現場立入規制の徹底不足', '現場と本部間の情報伝達遅延']
		1-21	755.402	発災から102分	現場閉鎖後の問い合わせ内容の追加整理と避難所情報の再確認	自治体職員	○○付近（住所：枚方市楠葉朝日二丁目6、UTM座標：〇〇〇〇〇〇）の現場閉鎖後、災害対策本部や問い合わせ窓口に『避難した家族の安否や居場所が分からない』『避難所で会えない』『現場の安全状況や立入可能時期を知りたい』といった問い合わせが引き続き寄せられている。避難所名簿・安否確認リストとの照合・再整理を進めている。	現場管理は既に消防から警察・自治体に引き継がれており、問い合わせ窓口は市役所災害対策本部で継続運用中。避難所や安否確認リストは本部で一元管理。現場の立入は引き続き規制中。避難所には新たな住民の追加来所情報もあり。	標高約12.8m、傾斜1.3%のごく緩やかな低地。淀川氾濫流による排水能力を超えた冠水が住宅地全体に波及しやすく、道路・敷地の水没と孤立化リスクが高い。高台や迂回路がなく、地域全体が浸水域に取り残されやすい。	現場閉鎖後の住民・家族対応、問い合わせ窓口体制の運用訓練、避難所名簿・安否確認リストの整合・再整理、住民・家族への説明体制強化	救助・撤収・現場閉鎖後も住民や家族からの問い合わせが継続。問い合わせ窓口の運用、名簿・安否確認リストの一元管理・整合性確保、住民・家族への説明・安心確保が訓練のポイント。	問い合わせ窓口での丁寧な対応、安否確認リストや避難所情報の照合・案内、現場立入規制や安全状況の説明、問い合わせ内容の記録、名簿不一致時の追加確認・調整、必要に応じて関係機関への連絡・調整。	問い合わせ件数の増加による対応遅延、名簿と安否確認リストの不一致・照合遅延、情報伝達の行き違い、現場閉鎖後の立入希望者対応、住民・家族の不安や混乱の拡大	3.0m以上5.0m未満の浸水が住宅1階全体・屋根上に継続（24時間以上72時間未満継続予想）	住宅被害（床上浸水・屋根上避難）・住民孤立・現場閉鎖後の住民・家族対応	住宅1階全体が長時間浸水し、住民は2階や屋根上に避難していた。救助・搬送・安否確認・撤収作業が全て完了し現場は閉鎖されたが、住民や家族からの安否や現場状況に関する問い合わせが続いている。避難所への新規来所住民もあり、名簿・安否確認リストの照合が必要。	撤収後の問い合わせ窓口設置・運用、安否確認リスト・避難所情報の一元管理、現場立入規制の徹底、住民・家族への丁寧な説明体制、名簿・リストの整合性確保、関係機関との情報共有、活動記録・問い合わせ記録の整備	平成30年7月豪雨（西日本豪雨）岡山県真備町などで、救助活動終息・現場閉鎖後も住民や家族からの問い合わせが殺到し、安否確認・情報提供体制の整備が課題となった事例あり。	['現場閉鎖後の管理不備による安全リスク', '住民・家族への説明対応の遅延', '名簿・安否確認リストの整合性不備']	['住民・家族の不安増大', '現場立入規制の徹底不足', '現場と本部間の情報伝達遅延']
		1-22	755.402	発災から109分	現場閉鎖後の問い合わせ内容の追加整理と避難所情報の再確認（続報）	自治体職員	○○付近（住所：枚方市楠葉朝日二丁目6、UTM座標：〇〇〇〇〇〇）の現場閉鎖後、災害対策本部や問い合わせ窓口に引き続き『避難した家族の安否や居場所が分からない』『避難所で会えない』『新たに避難所に到着した住民の情報がある』などの問い合わせ・追加情報が寄せられている。避難所名簿・安否確認リストとの照合・再整理を継続中。	現場管理は既に消防から警察・自治体に引き継がれており、問い合わせ窓口は市役所災害対策本部で継続運用中。現場の立入は引き続き規制中。避難所には新たな住民の追加来所情報もあり。避難所間の移動や名簿記載漏れも確認されている。	標高約12.8m、傾斜1.3%のごく緩やかな低地。淀川氾濫流による排水能力を超えた冠水が住宅地全体に波及しやすく、道路・敷地の水没と孤立化リスクが高い。高台や迂回路がなく、地域全体が浸水域に取り残されやすい。	現場閉鎖後の住民・家族対応、問い合わせ窓口運用訓練、避難所名簿・安否確認リストの整合・再整理、住民・家族への説明体制強化	救助・撤収・現場閉鎖後も住民や家族からの問い合わせが継続。問い合わせ窓口の運用、名簿・安否確認リストの一元管理・整合性確保、住民・家族への説明・安心確保、避難所間移動や新規来所情報の追加整理が訓練のポイント。	問い合わせ窓口での丁寧な対応、安否確認リストや避難所情報の照合・案内、現場立入規制や安全状況の説明、問い合わせ内容の記録、名簿不一致時の追加確認・調整、避難所間の情報共有、必要に応じて関係機関への連絡・調整。	問い合わせ件数の増加による対応遅延、名簿と安否確認リストの不一致・照合遅延、避難所間の情報共有不足、情報伝達の行き違い、現場閉鎖後の立入希望者対応、住民・家族の不安や混乱の拡大	3.0m以上5.0m未満の浸水が住宅1階全体・屋根上に継続（24時間以上72時間未満継続予想）	住宅被害（床上浸水・屋根上避難）・住民孤立・現場閉鎖後の住民対応	住宅1階全体が長時間浸水し、住民は2階や屋根上に避難していた。救助・搬送・安否確認・撤収作業が全て完了し現場は閉鎖されたが、住民や家族からの安否や現場状況に関する問い合わせが続いている。避難所への新規来所住民もあり、名簿・安否確認リストの照合が必要。避難所間の移動や名簿記載漏れも発生している。	撤収後の問い合わせ窓口設置・運用、安否確認リスト・避難所情報の一元管理、現場立入規制の徹底、住民・家族への丁寧な説明体制、名簿・リストの整合性確保、避難所間の情報共有体制強化、関係機関との情報共有、活動記録・問い合わせ記録の整備	平成30年7月豪雨（西日本豪雨）岡山県真備町などで、救助活動終息・現場閉鎖後も住民や家族からの問い合わせが殺到し、安否確認・情報提供体制の整備や避難所間の情報共有が課題となった事例あり。	['現場閉鎖後の管理不備による安全リスク', '住民・家族への説明対応の遅延', '名簿・安否確認リストの整合性不備', '避難所間の情報共有不足']	['住民・家族の不安増大', '現場立入規制の徹底不足', '現場と本部間の情報伝達遅延']
		1-23	755.402	発災から114分	現場閉鎖後の問い合わせ内容の最終整理と避難所情報の再照合（続報）	自治体職員	○○付近（住所：枚方市楠葉朝日二丁目6、UTM座標：〇〇〇〇〇〇）の現場閉鎖後、災害対策本部や問い合わせ窓口に引き続き『避難した家族の安否や居場所が分からない』『避難所で会えない』『避難所に新たに到着した住民の情報がある』等の問い合わせや追加情報が寄せられている。避難所名簿や安否確認リストとの照合・再整理を続行中。	現場管理は既に消防から警察・自治体に引き継がれている。問い合わせ窓口は市役所災害対策本部で運用中。避難所には新たな住民の追加来所情報もあり、避難所間の移動や名簿記載漏れも散見されている。	標高約12.8m、傾斜1.3%のごく緩やかな低地。淀川氾濫流による排水能力を超えた冠水が住宅地全体に波及しやすく、道路・敷地の水没と孤立化リスクが高い。高台や迂回路がなく、地域全体が浸水域に取り残されやすい。	現場閉鎖後の住民・家族対応、問い合わせ窓口運用訓練、避難所名簿・安否確認リストの整合・再整理、住民・家族への説明体制強化	救助・撤収・現場閉鎖後も住民や家族からの問い合わせが継続。問い合わせ窓口の運用、名簿・安否確認リストの一元管理・整合性確保、住民・家族への説明・安心確保、避難所間移動や新規来所情報の追加整理が訓練のポイント。	問い合わせ窓口での丁寧な対応、安否確認リストや避難所情報の照合・案内、現場立入規制や安全状況の説明、問い合わせ内容の記録、名簿不一致時の追加確認・調整、避難所間の情報共有、必要に応じて関係機関への連絡・調整。	問い合わせ件数の増加による対応遅延、名簿と安否確認リストの不一致・照合遅延、避難所間の情報共有不足、情報伝達の行き違い、現場閉鎖後の立入希望者対応、住民・家族の不安や混乱の拡大	3.0m以上5.0m未満の浸水が住宅1階全体・屋根上に継続（24時間以上72時間未満継続予想）	住宅被害（床上浸水・屋根上避難）・住民孤立・現場閉鎖後の住民対応	住宅1階全体が長時間浸水し、住民は2階や屋根上に避難していた。救助・搬送・安否確認・撤収作業が全て完了し現場は閉鎖されたが、住民や家族からの安否や現場状況に関する問い合わせが続いている。避難所への新規来所住民もあり、名簿・安否確認リストの照合が必要。避難所間の移動や名簿記載漏れも発生している。	撤収後の問い合わせ窓口設置・運用、安否確認リスト・避難所情報の一元管理、現場立入規制の徹底、住民・家族への丁寧な説明体制、名簿・リストの整合性確保、避難所間の情報共有体制強化、関係機関との情報共有、活動記録・問い合わせ記録の整備	平成30年7月豪雨（西日本豪雨）岡山県真備町などで、救助活動終息・現場閉鎖後も住民や家族からの問い合わせが殺到し、安否確認・情報提供体制の整備や避難所間の情報共有が課題となった事例あり。	['現場閉鎖後の管理不備による安全リスク', '住民・家族への説明対応の遅延', '名簿・安否確認リストの整合性不備', '避難所間の情報共有不足']	['住民・家族の不安増大', '現場立入規制の徹底不足', '現場と本部間の情報伝達遅延']
		1-24	755.402	発災から118分	現場閉鎖後の問い合わせ内容の最終整理と避難所情報の再照合（続報）	自治体職員	○○付近（住所：枚方市楠葉朝日二丁目6、UTM座標：〇〇〇〇〇〇）の現場閉鎖後、災害対策本部や問い合わせ窓口に引き続き『避難した家族の安否や居場所が分からない』『避難所で会えない』『避難所に新たに到着した住民の情報がある』等の問い合わせや追加情報が寄せられています。避難所名簿や安否確認リストとの照合・再整理を続行中です。	現場管理は既に消防から警察・自治体に引き継がれています。問い合わせ窓口は市役所災害対策本部で運用中。避難所には新たな住民の追加来所情報もあり、避難所間の移動や名簿記載漏れも散見されています。	標高約12.8m、傾斜1.3%のごく緩やかな低地。淀川氾濫流による排水能力を超えた冠水が住宅地全体に波及しやすく、道路・敷地の水没と孤立化リスクが高い。高台や迂回路がなく、地域全体が浸水域に取り残されやすい。	現場閉鎖後の住民・家族対応、問い合わせ窓口運用訓練、避難所名簿・安否確認リストの整合・再整理、住民・家族への説明体制強化	救助・撤収・現場閉鎖後も住民や家族からの問い合わせが継続。問い合わせ窓口の運用、名簿・安否確認リストの一元管理・整合性確保、住民・家族への説明・安心確保、避難所間移動や新規来所情報の追加整理が訓練のポイント。	問い合わせ窓口での丁寧な対応、安否確認リストや避難所情報の照合・案内、現場立入規制や安全状況の説明、問い合わせ内容の記録、名簿不一致時の追加確認・調整、避難所間の情報共有、必要に応じて関係機関への連絡・調整。	問い合わせ件数の増加による対応遅延、名簿と安否確認リストの不一致・照合遅延、避難所間の情報共有不足、情報伝達の行き違い、現場閉鎖後の立入希望者対応、住民・家族の不安や混乱の拡大	3.0m以上5.0m未満の浸水が住宅1階全体・屋根上に継続（24時間以上72時間未満継続予想）	住宅被害（床上浸水・屋根上避難）・住民孤立・現場閉鎖後の住民対応	住宅1階全体が長時間浸水し、住民は2階や屋根上に避難していた。救助・搬送・安否確認・撤収作業が全て完了し現場は閉鎖されたが、住民や家族からの安否や現場状況に関する問い合わせが続いている。避難所への新規来所住民もあり、名簿・安否確認リストの照合が必要。避難所間の移動や名簿記載漏れも発生している。	撤収後の問い合わせ窓口設置・運用、安否確認リスト・避難所情報の一元管理、現場立入規制の徹底、住民・家族への丁寧な説明体制、名簿・リストの整合性確保、避難所間の情報共有体制強化、関係機関との情報共有、活動記録・問い合わせ記録の整備	平成30年7月豪雨（西日本豪雨）岡山県真備町などで、救助活動終息・現場閉鎖後も住民や家族からの問い合わせが殺到し、安否確認・情報提供体制の整備や避難所間の情報共有が課題となった事例あり。	['現場閉鎖後の管理不備による安全リスク', '住民・家族への説明対応の遅延', '名簿・安否確認リストの整合性不備', '避難所間の情報共有不足']	['住民・家族の不安増大', '現場立入規制の徹底不足', '現場と本部間の情報伝達遅延']
		1-25	755.402	発災から125分	現場閉鎖後の問い合わせ内容の最終整理と避難所情報の再照合（続報）	自治体職員	○○付近（住所：枚方市楠葉朝日二丁目6、UTM座標：〇〇〇〇〇〇）の現場閉鎖後、災害対策本部や問い合わせ窓口に引き続き『避難した家族の安否や居場所が分からない』『避難所で会えない』『避難所に新たに到着した住民の情報がある』『健康状態が不安な高齢者が避難所にいる』等の問い合わせや追加情報が寄せられています。避難所名簿や安否確認リストとの照合・再整理と健康観察の追加対応を続行中です。	現場管理は既に消防から警察・自治体に引き継がれています。問い合わせ窓口は市役所災害対策本部で運用中。避難所には新たな住民の追加来所情報や健康観察要請もあり、避難所間の移動や名簿記載漏れも散見されています。健康観察は医療スタッフ増員で対応中です。	標高約12.8m、傾斜1.3%のごく緩やかな低地。淀川氾濫流による排水能力を超えた冠水が住宅地全体に波及しやすく、道路・敷地の水没と孤立化リスクが高い。高台や迂回路がなく、地域全体が浸水域に取り残されやすい。	現場閉鎖後の住民・家族対応、問い合わせ窓口運用訓練、避難所名簿・安否確認リストの整合・再整理、住民・家族への説明体制強化、健康観察体制の拡充	救助・撤収・現場閉鎖後も住民や家族からの問い合わせが継続。問い合わせ窓口の運用、名簿・安否確認リストの一元管理・整合性確保、住民・家族への説明・安心確保、避難所間移動や新規来所情報の追加整理、避難所での健康観察体制強化が訓練のポイント。	問い合わせ窓口での丁寧な対応、安否確認リストや避難所情報の照合・案内、現場立入規制や安全状況の説明、問い合わせ内容の記録、名簿不一致時の追加確認・調整、避難所間の情報共有、健康観察の実施と記録、必要に応じて関係機関への連絡・調整。	問い合わせ件数の増加による対応遅延、名簿と安否確認リストの不一致・照合遅延、避難所間の情報共有不足、健康観察の人員・資材不足、情報伝達の行き違い、現場閉鎖後の立入希望者対応、住民・家族の不安や混乱の拡大	3.0m以上5.0m未満の浸水が住宅1階全体・屋根上に継続（24時間以上72時間未満継続予想）	住宅被害（床上浸水・屋根上避難）・住民孤立・現場閉鎖後の住民対応・避難所健康観察	住宅1階全体が長時間浸水し、住民は2階や屋根上に避難していた。救助・搬送・安否確認・撤収作業が全て完了し現場は閉鎖されたが、住民や家族からの安否や現場状況に関する問い合わせが続いている。避難所への新規来所住民もあり、名簿・安否確認リストの照合が必要。避難所では医療スタッフ増員による健康観察体制強化も進行中。避難所間の移動や名簿記載漏れも発生している。	撤収後の問い合わせ窓口設置・運用、安否確認リスト・避難所情報の一元管理、現場立入規制の徹底、住民・家族への丁寧な説明体制、名簿・リストの整合性確保、避難所間の情報共有体制強化、健康観察・医療スタッフの増員、関係機関との情報共有、活動記録・問い合わせ記録の整備	平成30年7月豪雨（西日本豪雨）岡山県真備町などで、救助活動終息・現場閉鎖後も住民や家族からの問い合わせが殺到し、安否確認・情報提供体制や避難所内の健康観察体制の整備が課題となった事例あり。	['現場閉鎖後の管理不備による安全リスク', '住民・家族への説明対応の遅延', '名簿・安否確認リストの整合性不備', '避難所間の情報共有不足', '避難所での健康急変・感染症拡大']	['住民・家族の不安増大', '現場立入規制の徹底不足', '現場と本部間の情報伝達遅延', '避難所内でのパニック・混乱拡大', '医療資材・人員の不足による二次的健康被害']
		1-26	755.402	発災から130分	避難所内での健康観察体制の再点検と追加健康観察の実施	自治体職員	○○付近（住所：枚方市楠葉朝日二丁目6、UTM座標：〇〇〇〇〇〇）の避難所で、追加派遣された医療スタッフによる全避難者の健康状態再チェックと問診・体温測定が実施されている。前回の健康観察で体調不良を訴えた高齢者については個別に経過観察を継続。避難所全体で感染症対策（マスク着用・消毒・換気）の再徹底を住民にアナウンスしている。	健康観察記録は災害対策本部と医療機関に逐次報告。避難所内の隔離スペースの使用状況や新たな重症者・医療搬送要請は今のところ発生していないが、念のため医療スタッフの増員体制を維持中。避難所間の住民移動や名簿記載漏れも引き続き注意している。	標高約12.8m、傾斜1.3%のごく緩やかな低地。淀川氾濫流による排水能力を超えた冠水が住宅地全体に波及しやすく、避難所も低地部に立地。長時間の避難生活によるストレス・健康リスクが高まる。	避難所運営における健康管理体制の実効性確認、感染症拡大防止策の徹底、記録管理・情報共有訓練、住民安心確保の強化	全避難者の健康状態を再度記録・集計し、感染症疑い者の隔離・動線管理・衛生対策を徹底。記録の正確な管理と住民説明、感染症拡大防止策の徹底が訓練ポイント。避難所間移動や新規来所情報の追加整理も重要。	健康観察記録の集計・報告、感染症対策の再徹底（マスク・消毒・換気）、隔離スペースの管理、住民への状況説明・安心確保、名簿・安否確認リストの更新、自治体・医療機関との情報共有、避難所間の情報共有体制構築	健康観察記録の正確な集計・管理、衛生資材の不足、住民の不安や混乱、感染症対策の徹底困難、夜間や混雑時の管理調整、名簿管理・健康観察記録の遅れ、避難所間の情報共有不足	3.0m以上5.0m未満の浸水が住宅1階全体・屋根上に継続（24時間以上72時間未満継続予想）	避難所運営・健康被害・感染症対策	避難所での長時間滞在・密集状態により体調不良を訴える住民が急増。医療スタッフの増員で全避難者の健康観察体制を強化し、感染症疑い者の隔離や住民説明も重要。記録集計・名簿管理・感染症対策の徹底が急務。	定期的な健康観察・体調管理、感染症対策（隔離・消毒・換気・動線分離）、医療スタッフ・保健師の増員、衛生資材の迅速補給、住民説明・安心確保の体制強化、名簿管理・情報共有の徹底	平成30年7月豪雨（西日本豪雨）岡山県真備町などで、避難所内での感染症疑い・健康急変事案が多発し、衛生資材・医療人員不足や住民説明体制の課題が指摘された。	['避難所内での健康急変・感染症拡大', '体調不良者の重症化・医療搬送遅延', '名簿管理・安否確認の遅延', '住民の不安・混乱拡大']	['避難所内のパニック・不安拡大', '感染症の集団発生による避難所閉鎖リスク', '医療機関の受入超過・連携遅延', '衛生資材不足による二次的健康被害']
		1-27	755.402	発災から134分	避難所内での夜間追加健康観察・体調不良者への個別対応	自治体職員	○○付近（住所：枚方市楠葉朝日二丁目6、UTM座標：〇〇〇〇〇〇）の避難所で、夜間の巡回健康観察中に高齢者1名が発熱と倦怠感を訴え、追加の体温測定・経過観察を実施。既存の隔離スペースに一時的に移動し、医療スタッフによる問診を行った。	体調不良者は家族同伴で避難中。夜間のため医療機関への即時搬送は見合わせ、翌朝の状態を見て搬送判断予定。健康観察記録は災害対策本部に逐次報告。避難所内の他住民には状況説明済み。	標高約12.8m、傾斜1.3%のごく緩やかな低地。淀川氾濫流による長時間浸水域で、避難所も低地部に立地し、避難者の密集・健康リスクが高い。	避難所運営での夜間体調急変対応、個別健康観察・隔離の実施、住民説明・安心確保、夜間の医療スタッフ体制・記録管理の徹底訓練	夜間に新規体調不良者が発生し、既存の健康観察・隔離体制が試される。追加の個別対応や住民説明、記録管理、夜間の医療スタッフ連携が訓練ポイント。	体調不良者の隔離・経過観察、健康観察記録の更新・本部報告、夜間の医療スタッフ連携、避難所内住民への状況説明、翌朝の搬送判断準備、名簿・健康観察記録の整合性確認	夜間の医療スタッフ・資材不足、体調不良者の重症化リスク、住民の不安拡大、記録管理や名簿更新の遅延、他住民への感染拡大防止の徹底困難	3.0m以上5.0m未満の浸水が住宅1階全体・屋根上に継続（24時間以上72時間未満継続予想）	避難所運営・健康被害・感染症対策・夜間対応	避難所での長時間滞在・密集状態により夜間に体調不良者が追加発生。既存の隔離スペースを活用し、夜間の医療スタッフが個別対応。住民・家族の不安や混乱も拡大しやすい状況。	夜間も含めた定期的な健康観察・体調管理、感染症対策（隔離・消毒・換気・動線分離）、医療スタッフの夜間シフト体制強化、衛生資材の十分な備蓄・迅速補給、住民説明・安心確保の体制強化、名簿・健康観察記録の徹底	平成30年7月豪雨（西日本豪雨）岡山県真備町などで、避難所内での感染症疑い・健康急変事案が多発し、夜間の医療体制や衛生資材不足、住民説明体制の課題が指摘された。	['避難所内での健康急変・感染症拡大', '体調不良者の重症化・医療搬送遅延', '名簿管理・健康観察の遅延', '住民の不安・混乱拡大']	['避難所内のパニック・不安拡大', '感染症の集団発生による避難所閉鎖リスク', '医療機関の受入超過・連携遅延', '衛生資材不足による二次的健康被害']
		1-28	755.402	発災から137分	避難所内での夜間追加体調不良者発生と隔離スペース確保要請	避難所職員	○○付近（住所：枚方市楠葉朝日二丁目6、UTM座標：〇〇〇〇〇〇）の避難所で、夜間の健康観察巡回中に新たに発熱・咳・倦怠感を訴える住民がさらに1名発生。既存の隔離スペースは既に使用中で満床となっており、追加の隔離場所の確保が急務となっている。	体調不良者は成人女性。家族は同避難所内に同伴しているが、夜間のため医療機関への即時搬送は翌朝以降を検討中。自治体本部・医療機関には追加連絡済み。	標高約12.8m、傾斜1.3%のごく緩やかな低地。淀川氾濫流による長時間浸水域で、避難所も低地部に立地し、避難者の密集・健康リスクが高い。	避難所運営時の夜間体調急変・隔離体制の限界対応、追加スペース確保・住民説明・医療スタッフ夜間運用の判断訓練	夜間に体調不良者が連続発生し、隔離スペース・医療スタッフとも限界。追加隔離スペースの設営判断、夜間の医療体制維持、住民説明・不安対応、記録管理が訓練ポイント。	夜間の体調不良者への応急対応、追加隔離スペースの即時設営検討、医療スタッフの夜間対応体制調整、症状者の経過観察記録、住民・家族への状況説明と不安対応、名簿・健康観察記録の更新、自治体・医療機関との情報共有。	隔離スペースの物理的限界、夜間の人員・医療資材不足、体調不良者の重症化リスク、住民・家族の不安拡大、夜間の記録管理や名簿更新の遅延、感染拡大防止の徹底困難	3.0m以上5.0m未満の浸水が住宅1階全体・屋根上に継続（24時間以上72時間未満継続予想）	避難所運営・健康被害・感染症対策・夜間対応	避難所での長時間滞在・密集状態により夜間に体調不良者が追加発生。既存の隔離スペースが満床となり、追加隔離や夜間の医療スタッフ体制強化が急務。住民・家族の不安や混乱も拡大しやすい状況。	夜間も含めた定期的な健康観察・体調管理、感染症対策（隔離・消毒・換気・動線分離）、医療スタッフの夜間シフト体制強化、衛生資材の十分な備蓄・迅速補給、住民説明・安心確保の体制強化、名簿・健康観察記録の徹底	平成30年7月豪雨（西日本豪雨）岡山県真備町などで、避難所内での感染症疑い・健康急変事案が多発し、夜間の医療体制や衛生資材不足、住民説明体制の課題が指摘された。	['避難所内での健康急変・感染症拡大', '体調不良者の重症化・医療搬送遅延', '名簿管理・健康観察の遅延', '住民の不安・混乱拡大']	['避難所内のパニック・不安拡大', '感染症の集団発生による避難所閉鎖リスク', '医療機関の受入超過・連携遅延', '衛生資材不足による二次的健康被害']
		1-29	755.402	発災から142分	避難所内での夜間体調不良者追加発生・隔離スペース拡張判断	避難所職員	○○付近（住所：枚方市楠葉朝日二丁目6、UTM座標：〇〇〇〇〇〇）の避難所で、夜間の健康観察巡回中に新たに発熱・咳・倦怠感を訴える住民がさらに1名発生。既存の隔離スペースは満床となっており、教室や会議室等を転用した追加隔離スペースの設営を検討している。	新たな体調不良者は高齢男性1名。家族は同避難所内に同伴。自治体本部・医療機関には追加連絡済み。夜間のため医療スタッフの対応体制も逼迫。	標高約12.8m、傾斜1.3%のごく緩やかな低地。淀川氾濫流による長時間浸水域で、避難所も低地部に立地し、避難者の密集・健康リスクが高い。	夜間の避難所運営における体調急変・感染症疑い時の隔離スペース拡張判断、医療スタッフ夜間運用・住民説明・不安対応の訓練	夜間に体調不良者が連続発生し、隔離スペース・医療スタッフとも限界。教室や会議室等を転用した追加隔離スペースの設営判断、夜間体制の維持、住民説明・不安対応、記録管理が訓練ポイント。	夜間の体調不良者への応急対応、追加隔離スペースの即時設営検討、医療スタッフの夜間対応体制調整、症状者の経過観察記録、住民・家族への状況説明と不安対応、名簿・健康観察記録の更新、自治体・医療機関との情報共有	隔離スペースの物理的限界、夜間の人員・医療資材不足、体調不良者の重症化リスク、住民・家族の不安拡大、夜間の記録管理や名簿更新の遅延、感染拡大防止の徹底困難	3.0m以上5.0m未満の浸水が住宅1階全体・屋根上に継続（24時間以上72時間未満継続予想）	避難所運営・健康被害・感染症対策・夜間対応	避難所での長時間滞在・密集状態により夜間に体調不良者がさらに発生。既存の隔離スペースが満床となり、追加隔離や夜間の医療スタッフ体制強化が急務。住民・家族の不安や混乱も拡大しやすい状況。	夜間も含めた定期的な健康観察・体調管理、感染症対策（隔離・消毒・換気・動線分離）、医療スタッフ・保健師の夜間シフト体制、衛生資材の十分な備蓄・迅速補給、住民説明・安心確保の体制強化、名簿・健康観察記録の徹底、追加隔離スペース転用の事前マニュアル整備	平成30年7月豪雨（西日本豪雨）岡山県真備町などで、避難所内での感染症疑い・健康急変事案が多発し、夜間の医療体制や衛生資材不足、住民説明体制の課題が指摘された。	['避難所内での健康急変・感染症拡大', '体調不良者の重症化・医療搬送遅延', '名簿管理・健康観察の遅延', '住民の不安・混乱拡大']	['避難所内のパニック・不安拡大', '感染症の集団発生による避難所閉鎖リスク', '医療機関の受入超過・連携遅延', '衛生資材不足による二次的健康被害']
		1-30	755.402	発災から148分	避難所内での夜間体調不良者追加発生・隔離スペース・医療スタッフ対応限界への警戒	避難所職員	○○付近（住所：枚方市楠葉朝日二丁目6、UTM座標：〇〇〇〇〇〇）の避難所で、夜間健康観察中にさらに1名（成人女性）が発熱・咳・倦怠感を訴えた。既存の隔離スペースは満床であり、追加の隔離スペース設営と夜間の医療スタッフ増員を現場で検討している。	体調不良者は成人女性1名。家族は同避難所内に同伴。自治体本部・医療機関には追加連絡済み。夜間のため医療スタッフの対応体制が限界に近い状況。	標高約12.8m、傾斜1.3%のごく緩やかな低地。淀川氾濫流による長時間浸水域で、避難所も低地部に立地し、避難者の密集・健康リスクが高い。	避難所運営時の夜間体調急変・感染症疑い時の隔離スペース拡張判断、医療スタッフ夜間運用・住民説明・不安対応の訓練	夜間に体調不良者が連続発生し、隔離スペース・医療スタッフともに限界。教室や会議室等を転用した追加隔離スペースの設営判断、夜間体制の維持、住民説明・不安対応、記録管理が訓練ポイント。	夜間の体調不良者への応急対応、追加隔離スペースの即時設営検討、医療スタッフの夜間対応体制調整、症状者の経過観察記録、住民・家族への状況説明と不安対応、名簿・健康観察記録の更新、自治体・医療機関との情報共有	隔離スペースの物理的限界、夜間の人員・医療資材不足、体調不良者の重症化リスク、住民・家族の不安拡大、夜間の記録管理や名簿更新の遅延、感染拡大防止の徹底困難	3.0m以上5.0m未満の浸水が住宅1階全体・屋根上に継続（24時間以上72時間未満継続予想）	避難所運営・健康被害・感染症対策・夜間対応	避難所での長時間滞在・密集状態により夜間に体調不良者がさらに発生。既存の隔離スペースが満床となり、追加隔離や夜間の医療スタッフ体制強化が急務。住民・家族の不安や混乱も拡大しやすい状況。	夜間も含めた定期的な健康観察・体調管理、感染症対策（隔離・消毒・換気・動線分離）、医療スタッフ・保健師の夜間シフト体制、衛生資材の十分な備蓄・迅速補給、住民説明・安心確保の体制強化、名簿・健康観察記録の徹底、追加隔離スペース転用の事前マニュアル整備	平成30年7月豪雨（西日本豪雨）岡山県真備町などで、避難所内での感染症疑い・健康急変事案が多発し、夜間の医療体制や衛生資材不足、住民説明体制の課題が指摘された。	['避難所内での健康急変・感染症拡大', '体調不良者の重症化・医療搬送遅延', '名簿管理・健康観察の遅延', '住民の不安・混乱拡大']	['避難所内のパニック・不安拡大', '感染症の集団発生による避難所閉鎖リスク', '医療機関の受入超過・連携遅延', '衛生資材不足による二次的健康被害']
		1-31	755.402	発災から153分	避難所内での夜間体調不良者追加発生・隔離スペースの再拡張要請	避難所職員	○○付近（住所：枚方市楠葉朝日二丁目6、UTM座標：〇〇〇〇〇〇）の避難所で、夜間の見回り中にさらに2名（高齢男性1名・成人女性1名）が発熱・咳・全身倦怠感を訴えました。既存の隔離スペースは満床となっており、体育館倉庫や廊下の一部区画等を転用した追加隔離スペースの設営を現場判断で開始しました。	新たな体調不良者は高齢男性1名と成人女性1名。家族は同避難所内に同伴。自治体本部・医療機関には追加連絡済み。夜間のため医療スタッフの対応体制も逼迫しています。	標高約12.8m、傾斜1.3%のごく緩やかな低地。淀川氾濫流による長時間浸水域で、避難所も低地部に立地し、避難者の密集・健康リスクが高い。	避難所運営時の夜間体調急変・隔離スペース再拡張対応、現場判断力・住民説明・感染症対策の現場運用訓練	夜間に体調不良者が連続発生し、既存隔離スペース・医療スタッフともに限界。体育館倉庫や廊下区画等を転用した更なる追加隔離スペース設営、夜間体制の維持、住民説明・不安対応、名簿・健康観察記録の徹底が訓練ポイント。	夜間の体調不良者への応急対応、追加隔離スペース（倉庫・廊下等）の即時設営、医療スタッフの夜間対応体制調整、症状者の経過観察記録、住民・家族への状況説明と不安対応、名簿・健康観察記録の更新、自治体・医療機関との情報共有。	隔離スペースの物理的限界に伴う収容困難、夜間の人員・医療資材不足、体調不良者の重症化リスク、住民・家族の不安拡大、夜間の記録管理や名簿更新の遅延、感染拡大防止の徹底困難	3.0m以上5.0m未満の浸水が住宅1階全体・屋根上に継続（24時間以上72時間未満継続予想）	避難所運営・健康被害・感染症対策・夜間対応	避難所での長時間滞在・密集状態により、夜間に体調不良者がさらに追加発生。既存・追加の隔離スペースが満床となり、体育館倉庫や廊下区画等を転用した更なる追加隔離スペースの設営が急務。住民・家族の不安や混乱も拡大しやすい状況で、夜間の医療スタッフ体制も逼迫している。	夜間も含めた定期的な健康観察・体調管理、感染症対策（隔離・消毒・換気・動線分離）、医療スタッフ・保健師の夜間シフト体制、衛生資材の十分な備蓄・迅速補給、住民説明・安心確保の体制強化、名簿・健康観察記録の徹底、追加スペース転用の事前マニュアル整備	平成30年7月豪雨（西日本豪雨）岡山県真備町などで、避難所内での感染症疑い・健康急変事案が多発し、夜間の医療体制や衛生資材不足、住民説明体制の課題が指摘された。	['避難所内での健康急変・感染症拡大', '体調不良者の重症化・医療搬送遅延', '名簿管理・安否確認の遅延', '住民の不安・混乱拡大']	['避難所内のパニック・不安拡大', '感染症の集団発生による避難所閉鎖リスク', '医療機関の受入超過・連携遅延', '衛生資材不足による二次的健康被害']
		1-32	755.402	発災から158分	避難所内での夜間体調不良者多発・隔離スペースの限界突破と緊急対応会議の開催要請	避難所職員	○○付近（住所：枚方市楠葉朝日二丁目6、UTM座標：〇〇〇〇〇〇）の避難所で、夜間巡回中にさらに2名（成人女性1名・小児1名）が発熱・咳・全身倦怠感を訴えた。これまで設営した隔離スペースや廊下・倉庫等の転用スペースも全て満床となり、職員間で現場の感染症対応体制・医療スタッフ・衛生資材の限界について緊急会議を開催する必要が生じている。	新たな体調不良者は成人女性と小児。家族は同避難所内に同伴。夜間のため医療機関搬送は翌朝以降を想定。自治体本部・医療機関には追加連絡済み。住民からは『これ以上の感染拡大が心配』『夜間でも何らかの追加対応を』との強い要望が出ている。	標高約12.8m、傾斜1.3%のごく緩やかな低地。淀川氾濫流による長時間浸水域で、避難所も低地部に立地し、避難者の密集・健康リスクが高い。	避難所運営時の夜間体調急変・隔離スペース限界突破時の緊急現場会議・意思決定訓練、住民説明・感染症対策・医療スタッフ夜間運用・現場判断力強化	避難所での体調不良者が連続発生し、全ての隔離スペースが満床。現場医療体制・衛生資材・人員が限界に達した段階で、職員間の緊急対応会議を開催し、今後の感染症対策・住民説明・自治体本部への支援要請など総合的な現場判断が必要となる。	夜間の体調不良者への応急対応、既存隔離スペースの再確認、緊急現場会議の開催（医療スタッフ・自治体職員・避難所責任者）、自治体本部への追加支援要請、住民・家族への状況説明と不安対応、感染症対策の再徹底、名簿・健康観察記録の更新、翌朝以降の医療搬送計画策定、自治体・医療機関との情報共有。	隔離スペース・医療資材の物理的限界、夜間の人員・医療スタッフ不足、体調不良者の重症化リスク、住民・家族の不安拡大、現場判断の遅れや混乱、名簿・健康観察記録の遅延、感染拡大防止の徹底困難	3.0m以上5.0m未満の浸水が住宅1階全体・屋根上に継続（24時間以上72時間未満継続予想）	避難所運営・健康被害・感染症対策・夜間対応・現場判断	避難所での長時間滞在・密集状態により、夜間に体調不良者がさらに追加発生。既存・追加の隔離スペースが全て満床となり、現場の医療体制・衛生資材・人員が限界に達したことで、職員間で緊急会議を開催し、今後の感染症対策・住民説明・自治体本部への支援要請など総合的な現場判断が必要となっている。	夜間も含めた定期的な健康観察・体調管理、感染症対策（隔離・消毒・換気・動線分離）、医療スタッフ・保健師の夜間シフト体制、衛生資材の十分な備蓄・迅速補給、住民説明・安心確保の体制強化、名簿・健康観察記録の徹底、現場緊急会議マニュアルの整備、自治体・医療機関との連携強化	平成30年7月豪雨（西日本豪雨）岡山県真備町などで、避難所内での感染症疑い・健康急変事案が多発し、夜間の医療体制や衛生資材不足、住民説明体制の課題、現場判断の遅れが指摘された。	['避難所内での健康急変・感染症拡大', '体調不良者の重症化・医療搬送遅延', '名簿管理・安否確認の遅延', '住民の不安・混乱拡大', '現場判断の遅れによる対応遅延']	['避難所内のパニック・不安拡大', '感染症の集団発生による避難所閉鎖リスク', '医療機関の受入超過・連携遅延', '衛生資材不足による二次的健康被害']
		1-33	755.402	発災から163分	避難所内での夜間体調不良者の継続発生・現場対応限界突破と自治体本部への追加支援要請	避難所職員	○○付近（住所：枚方市楠葉朝日二丁目6、UTM座標：〇〇〇〇〇〇）の避難所で、夜間巡回中に新たに2名（成人男性1名・高齢女性1名）が発熱・咳・全身倦怠感を訴えた。隔離スペースは全て満床となっており、現場での対応が限界に近づいているため、自治体本部に対し緊急で追加の医療スタッフ・衛生資材・簡易隔離テントの派遣を要請した。	新たな体調不良者の家族は同避難所内に同伴。夜間のため医療機関搬送は翌朝以降を想定。住民からは『感染拡大が心配』『夜間でも追加対応を』との要望が続いている。	標高約12.8m、傾斜1.3%のごく緩やかな低地。淀川氾濫流による長時間浸水域で、避難所も低地部に立地し、避難者の密集・健康リスクが高い。	避難所運営時の夜間体調急変・隔離スペース限界突破時の自治体本部への追加支援要請、現場判断力・住民説明・感染症対策の現場運用訓練	夜間に体調不良者がさらに追加発生し、全ての隔離スペースが満床。現場の医療体制・衛生資材・人員が限界に達した段階で、自治体本部への追加支援要請を迅速に行う判断力と、住民説明・感染症対策徹底が訓練ポイント。	夜間の体調不良者への応急対応、自治体本部への医療スタッフ・衛生資材・隔離テント等の追加派遣要請、症状者の経過観察記録、住民・家族への状況説明と不安対応、名簿・健康観察記録の更新、翌朝以降の医療搬送計画策定、自治体・医療機関との情報共有。	隔離スペースや医療資材の物理的限界、夜間の人員・医療スタッフ不足、体調不良者の重症化リスク、住民・家族の不安拡大、現場判断の遅れや混乱、名簿・健康観察記録の遅延、感染拡大防止の徹底困難	3.0m以上5.0m未満の浸水が住宅1階全体・屋根上に継続（24時間以上72時間未満継続予想）	避難所運営・健康被害・感染症対策・夜間対応・自治体本部連携	避難所での長時間滞在・密集状態により、夜間に体調不良者がさらに追加発生。既存・追加の隔離スペースが全て満床となり、現場の医療体制・衛生資材・人員が限界に達したことで、自治体本部への追加支援要請を実施。住民・家族の不安や混乱も拡大しやすい状況。	夜間も含めた定期的な健康観察・体調管理、感染症対策（隔離・消毒・換気・動線分離）、医療スタッフ・保健師の夜間シフト体制、衛生資材の十分な備蓄・迅速補給、住民説明・安心確保の体制強化、名簿・健康観察記録の徹底、自治体本部との連携と追加支援要請マニュアルの整備	平成30年7月豪雨（西日本豪雨）岡山県真備町などで、避難所内での感染症疑い・健康急変事案が多発し、夜間の医療体制や衛生資材不足、住民説明体制の課題、現場判断の遅れが指摘された。	['避難所内での健康急変・感染症拡大', '体調不良者の重症化・医療搬送遅延', '名簿管理・安否確認の遅延', '住民の不安・混乱拡大', '現場判断の遅れによる対応遅延']	['避難所内のパニック・不安拡大', '感染症の集団発生による避難所閉鎖リスク', '医療機関の受入超過・連携遅延', '衛生資材不足による二次的健康被害']
		1-34	755.402	発災から167分	避難所内での夜間体調不良者追加発生・現場体制の一時的な安定化（続報）	避難所職員	○○付近（住所：枚方市楠葉朝日二丁目6、UTM座標：〇〇〇〇〇〇）の避難所で、夜間巡回中に新たな体調不良者（発熱・咳・倦怠感を訴える成人女性1名）が発生。既存および追加の隔離スペースは満床だが、現時点で他の避難者の急激な体調悪化や集団発症はなく、職員・医療スタッフは経過観察と記録管理を強化しつつ、夜間体制を維持している。	新規体調不良者の家族は同避難所内に同伴。夜間のため医療機関搬送は翌朝以降を予定。自治体本部・医療機関には追加報告済み。住民からは『不安があるが今は落ち着いている』との声も出ている。	標高約12.8m、傾斜1.3%のごく緩やかな低地。淀川氾濫流による長時間浸水域で、避難所も低地部に立地し、避難者の密集・健康リスクが高い。	夜間の避難所運営における追加体調不良者発生時の現場体制維持・記録管理・住民説明の訓練。自治体本部・医療機関との情報共有と現場安定化の確認。	隔離スペース満床状態で追加体調不良者が発生したが、現場体制は一時的に安定。夜間の医療体制維持、記録管理、住民説明・不安対応、翌朝以降の追加対応計画が訓練ポイント。	新規体調不良者への応急対応と経過観察、追加隔離スペース設営の検討継続、健康観察記録・名簿管理の徹底、住民・家族への状況説明と安心確保、自治体本部・医療機関への逐次報告、翌朝以降の追加対応計画の準備。	隔離スペースの物理的限界、夜間の人員・医療資材不足、住民・家族の不安継続、体調不良者の重症化リスク、記録管理や名簿更新の遅延、感染拡大防止の徹底困難	3.0m以上5.0m未満の浸水が住宅1階全体・屋根上に継続（24時間以上72時間未満継続予想）	避難所運営・健康被害・感染症対策・夜間対応	避難所での長時間滞在・密集状態により、夜間に体調不良者が連続発生。隔離スペース・医療スタッフともに限界状態だが、現場体制は一時的に安定。住民・家族の不安や混乱は継続しており、今後の追加発症や感染拡大リスクも残存。	夜間も含めた定期的な健康観察・体調管理、感染症対策（隔離・消毒・換気・動線分離）、医療スタッフの夜間シフト体制、衛生資材の十分な備蓄・迅速補給、住民説明・安心確保の体制強化、名簿・健康観察記録の徹底、翌朝以降の追加対応計画	平成30年7月豪雨（西日本豪雨）岡山県真備町などで、避難所内での感染症疑い・健康急変事案が多発し、夜間の医療体制や衛生資材不足、住民説明体制の課題が指摘された。	['避難所内での健康急変・感染症拡大', '体調不良者の重症化・医療搬送遅延', '名簿管理・安否確認の遅延', '住民の不安・混乱拡大']	['避難所内のパニック・不安拡大', '感染症の集団発生による避難所閉鎖リスク', '医療機関の受入超過・連携遅延', '衛生資材不足による二次的健康被害']
		1-35	755.402	発災から174分	避難所内での夜間体調不良者の新規発生・住民説明の強化要請	避難所職員	○○付近（住所：枚方市楠葉朝日二丁目6、UTM座標：〇〇〇〇〇〇）の避難所で、夜間巡回中に新たな体調不良者（発熱・咳・倦怠感を訴える成人男性1名）が発生。既存の隔離スペースは満床であり、現在は経過観察を行いながら、他の避難者との動線分離を実施している。	新規体調不良者の家族は同避難所内に同伴。夜間のため医療機関搬送は翌朝以降を予定。自治体本部・医療機関には追加報告済み。住民からは『感染拡大が心配』『経過説明をもっと聞きたい』との声も増えている。	標高約12.8m、傾斜1.3%のごく緩やかな低地。淀川氾濫流による長時間浸水域で、避難所も低地部に立地し、避難者の密集・健康リスクが高い。	夜間の避難所運営における体調不良者発生時の現場体制維持、住民説明・安心確保、感染症対策・記録管理の強化訓練。	隔離スペース満床状態が継続し、追加体調不良者が発生。住民説明・不安対応、現場体制維持、感染症対策・記録管理の徹底、翌朝以降の医療搬送計画が訓練ポイント。	新規体調不良者への応急対応と経過観察、動線分離の徹底、健康観察記録・名簿管理の強化、住民・家族への状況説明と安心確保、自治体本部・医療機関への逐次報告、翌朝以降の追加対応計画の準備。	隔離スペースの物理的限界、夜間の人員・医療資材不足、住民・家族の不安増大、体調不良者の重症化リスク、記録管理や名簿更新の遅延、感染拡大防止の徹底困難	3.0m以上5.0m未満の浸水が住宅1階全体・屋根上に継続（24時間以上72時間未満継続予想）	避難所運営・健康被害・感染症対策・夜間対応	避難所での長時間滞在・密集状態により、夜間に体調不良者が引き続き追加発生。既存の隔離スペースがすでに満床で、動線分離や経過観察で対応中。住民・家族の不安や説明要望が高まっており、現場体制維持と記録管理が重要となっている。	夜間も含めた定期的な健康観察・体調管理、感染症対策（隔離・消毒・換気・動線分離）、医療スタッフの夜間シフト体制、衛生資材の十分な備蓄・迅速補給、住民説明・安心確保の体制強化、名簿・健康観察記録の徹底、翌朝以降の追加対応計画。	平成30年7月豪雨（西日本豪雨）岡山県真備町などで、避難所内での感染症疑い・健康急変事案が多発し、夜間の医療体制や衛生資材不足、住民説明体制の課題が指摘された。	['避難所内での健康急変・感染症拡大', '体調不良者の重症化・医療搬送遅延', '名簿管理・安否確認の遅延', '住民の不安・混乱拡大']	['避難所内のパニック・不安拡大', '感染症の集団発生による避難所閉鎖リスク', '医療機関の受入超過・連携遅延', '衛生資材不足による二次的健康被害']
		1-36	755.402	発災から179分	避難所内での夜間体調不良者の追加発生・経過観察体制の継続	避難所職員	○○付近（住所：枚方市楠葉朝日二丁目6、UTM座標：〇〇〇〇〇〇）の避難所で、夜間巡回中に新たな体調不良者（発熱・咳・倦怠感を訴える高齢女性1名）が発生。既存の隔離スペースは満床であり、応急対応後は経過観察と家族・他避難者との動線分離で対応している。	新規体調不良者の家族は同避難所内に同伴。夜間のため医療機関搬送は翌朝以降を予定。自治体本部・医療機関には追加報告済み。住民からは『感染拡大が心配』『経過説明をもっと聞きたい』との声が引き続き寄せられている。	標高約12.8m、傾斜1.3%のごく緩やかな低地。淀川氾濫流による長時間浸水域で、避難所も低地部に立地し、避難者の密集・健康リスクが高い。	夜間の避難所運営における体調不良者追加発生時の現場体制維持、住民説明・安心確保、感染症対策・記録管理の強化訓練。	隔離スペース満床状態が継続し、夜間に追加体調不良者が発生。住民説明・不安対応、現場体制維持、感染症対策・記録管理の徹底、翌朝以降の医療搬送計画が訓練ポイント。	新規体調不良者への応急対応と経過観察、動線分離の徹底、健康観察記録・名簿管理の強化、住民・家族への状況説明と安心確保、自治体本部・医療機関への逐次報告、翌朝以降の医療搬送・体制強化計画の準備。	隔離スペースの物理的限界、夜間の人員・医療資材不足、住民・家族の不安増大、体調不良者の重症化リスク、記録管理や名簿更新の遅延、感染拡大防止の徹底困難	3.0m以上5.0m未満の浸水が住宅1階全体・屋根上に継続（24時間以上72時間未満継続予想）	避難所運営・健康被害・感染症対策・夜間対応	避難所での長時間滞在・密集状態により、夜間に体調不良者が追加発生。既存の隔離スペースが満床で、動線分離や経過観察で対応中。住民・家族の不安や説明要望が高まっており、現場体制維持と記録管理が重要となっている。	夜間も含めた定期的な健康観察・体調管理、感染症対策（隔離・消毒・換気・動線分離）、医療スタッフの夜間シフト体制、衛生資材の十分な備蓄・迅速補給、住民説明・安心確保の体制強化、名簿・健康観察記録の徹底、翌朝以降の追加対応計画。	平成30年7月豪雨（西日本豪雨）岡山県真備町などで、避難所内での感染症疑い・健康急変事案が多発し、夜間の医療体制や衛生資材不足、住民説明体制の課題が指摘された。	['避難所内での健康急変・感染症拡大', '体調不良者の重症化・医療搬送遅延', '名簿管理・安否確認の遅延', '住民の不安・混乱拡大']	['避難所内のパニック・不安拡大', '感染症の集団発生による避難所閉鎖リスク', '医療機関の受入超過・連携遅延', '衛生資材不足による二次的健康被害']
		1-37	755.402	発災から181分	避難所内での夜間体調不良者の新規発生・現場体制の経過観察と住民説明強化（続報）	避難所職員	○○付近（住所：枚方市楠葉朝日二丁目6、UTM座標：〇〇〇〇〇〇）の避難所で、夜間巡回中に新たな体調不良者（発熱・咳・倦怠感を訴える成人男性1名）が発生。隔離スペースは満床のため、応急対応後は家族とともに動線分離し、経過観察を継続している。	新規体調不良者の家族は同避難所内に同伴。夜間のため医療機関搬送は翌朝以降を予定。自治体本部・医療機関への追加報告済み。住民からは『感染拡大が心配』『経過説明をもっと聞きたい』との声が引き続き寄せられている。	標高約12.8m、傾斜1.3%のごく緩やかな低地。淀川氾濫流による長時間浸水域で、避難所も低地部に立地し、避難者の密集・健康リスクが高い。	夜間の避難所運営で体調不良者が継続発生する状況下における現場体制の維持、住民説明・安心確保、感染症対策・経過観察・記録管理の強化訓練。	隔離スペース満床が継続し、追加体調不良者が発生。住民説明・不安対応、現場体制維持、感染症対策・記録管理の徹底、翌朝以降の医療搬送計画が訓練ポイント。	新規体調不良者への応急対応と経過観察、動線分離の徹底、健康観察記録・名簿管理の強化、住民・家族への状況説明と安心確保、自治体本部・医療機関への逐次報告、翌朝以降の医療搬送・体制強化計画の準備。	隔離スペースの物理的限界、夜間の人員・医療資材不足、住民・家族の不安増大、体調不良者の重症化リスク、記録管理や名簿更新の遅延、感染拡大防止の徹底困難	3.0m以上5.0m未満の浸水が住宅1階全体・屋根上に継続（24時間以上72時間未満継続予想）	避難所運営・健康被害・感染症対策・夜間対応	避難所での長時間滞在・密集状態により、夜間に体調不良者が追加発生。既存の隔離スペースが満床で、動線分離や経過観察で対応中。住民・家族の不安や説明要望が高まっており、現場体制維持と記録管理が重要となっている。	夜間も含めた定期的な健康観察・体調管理、感染症対策（隔離・消毒・換気・動線分離）、医療スタッフの夜間シフト体制、衛生資材の十分な備蓄・迅速補給、住民説明・安心確保の体制強化、名簿・健康観察記録の徹底、翌朝以降の追加対応計画。	平成30年7月豪雨（西日本豪雨）岡山県真備町などで、避難所内での感染症疑い・健康急変事案が多発し、夜間の医療体制や衛生資材不足、住民説明体制の課題が指摘された。	['避難所内での健康急変・感染症拡大', '体調不良者の重症化・医療搬送遅延', '名簿管理・安否確認の遅延', '住民の不安・混乱拡大']	['避難所内のパニック・不安拡大', '感染症の集団発生による避難所閉鎖リスク', '医療機関の受入超過・連携遅延', '衛生資材不足による二次的健康被害']

## Sheet: 枚方市上島町14
評価	備考	シナリオID	災害の中心からの距離[m]	イベント発生時刻	付与内容	情報源	状況付与内容	補足情報	地形情報や想定想定される被害の特徴	訓練効果・狙い	判断ポイント	期待される対応行動	想定される課題	水位状況	被害の種類	詳細な被害状況	想定される対策	類似の過去事例(あれば記載)	直近のリスク	二次的なリスク
		1-1	944.547	発災から5分					標高11.3m前後、傾斜0.5%と非常に緩やかな高台寄りの地域。淀川氾濫時も中心地から約1km離れており、流入水が到達しにくい立地。周囲より若干高く、排水・溜水が起こりにくい。										[]	[]
		1-2	944.547	発災から6分					標高11.3m前後、傾斜0.5%と非常に緩やかな高台寄りの地域。淀川氾濫時も中心地から約1km離れており、流入水が到達しにくい立地。周囲より若干高く、排水・溜水が起こりにくい。										[]	[]
		1-3	944.547	発災から12分					標高11.3m前後、傾斜0.5%と非常に緩やかな高台寄りの地域。淀川氾濫時も中心地から約1km離れており、流入水が到達しにくい立地。周囲より若干高く、排水・溜水が起こりにくい。										[]	[]
		1-4	944.547	発災から18分					標高11.3m前後、傾斜0.5%と非常に緩やかな高台寄りの地域。淀川氾濫時も中心地から約1km離れており、流入水が到達しにくい立地。周囲より若干高く、排水・溜水が起こりにくい。										[]	[]
		1-5	944.547	発災から24分					標高11.3m前後、傾斜0.5%と非常に緩やかな高台寄りの地域。淀川氾濫時も中心地から約1km離れており、流入水が到達しにくい立地。周囲より若干高く、排水・溜水が起こりにくい。										[]	[]
		1-6	944.547	発災から26分					標高11.3m前後、傾斜0.5%と非常に緩やかな高台寄りの地域。淀川氾濫時も中心地から約1km離れており、流入水が到達しにくい立地。周囲より若干高く、排水・溜水が起こりにくい。										[]	[]
		1-7	944.547	発災から31分					標高11.3m前後、傾斜0.5%と非常に緩やかな高台寄りの地域。淀川氾濫時も中心地から約1km離れており、流入水が到達しにくい立地。周囲より若干高く、排水・溜水が起こりにくい。										[]	[]
		1-8	944.547	発災から36分					標高11.3m前後、傾斜0.5%と非常に緩やかな高台寄りの地域。淀川氾濫時も中心地から約1km離れており、流入水が到達しにくい立地。周囲より若干高く、排水・溜水が起こりにくい。										[]	[]
		1-9	944.547	発災から41分					標高11.3m前後、傾斜0.5%と非常に緩やかな高台寄りの地域。淀川氾濫時も中心地から約1km離れており、流入水が到達しにくい立地。周囲より若干高く、排水・溜水が起こりにくい。										[]	[]
		1-10	944.547	発災から47分					標高11.3m前後、傾斜0.5%と非常に緩やかな高台寄りの地域。淀川氾濫時も中心地から約1km離れており、流入水が到達しにくい立地。周囲より若干高く、排水・溜水が起こりにくい。										[]	[]
		1-11	944.547	発災から51分					標高11.3m前後、平均傾斜0.5%のごく緩やかな高台で、淀川中心部から約1km離れている。周辺の低地部や中心部に比べて水の流入が極めて起こりにくく、排水性も高い。大規模洪水時でも直接的な浸水や孤立のリスクはほぼ生じない立地。										[]	[]
		1-12	944.547	発災から59分					標高11.3m前後、平均傾斜0.5%のごく緩やかな高台で、淀川中心部から約1km離れている。周辺の低地部や中心部に比べて水の流入が極めて起こりにくく、排水性も高い。大規模洪水時でも直接的な浸水や孤立のリスクはほぼ生じない立地。										[]	[]
		1-13	944.547	発災から63分					標高11.3m前後、平均傾斜0.5%のごく緩やかな高台で、淀川中心部から約1km離れている。周辺の低地部や中心部に比べて水の流入が極めて起こりにくく、排水性も高い。大規模洪水時でも直接的な浸水や孤立のリスクはほぼ生じない立地。										[]	[]
		1-14	944.547	発災から66分					標高11.3m前後、平均傾斜0.5%のごく緩やかな高台で、淀川中心部から約1km離れている。周辺の低地部や中心部に比べて水の流入が極めて起こりにくく、排水性も高い。大規模洪水時でも直接的な浸水や孤立のリスクはほぼ生じない立地。										[]	[]
		1-15	944.547	発災から72分					標高11.3m前後、平均傾斜0.5%のごく緩やかな高台で、淀川中心部から約1km離れている。周囲の低地部や中心部に比べて水の流入が極めて起こりにくく、排水性も高い。大規模洪水時でも直接的な浸水や孤立のリスクはほぼ生じない立地。										[]	[]
		1-16	944.547	発災から77分					標高11.3m前後、平均傾斜0.5%のごく緩やかな高台で、淀川中心部から約1km離れている。周囲の低地部や中心部に比べて水の流入が極めて起こりにくく、排水性も高い。大規模洪水時でも直接的な浸水や孤立のリスクはほぼ生じない立地。										[]	[]
		1-17	944.547	発災から85分					標高11.3m前後、平均傾斜0.5%のごく緩やかな高台で、淀川中心部から約1km離れている。周囲の低地部や中心部に比べて水の流入が極めて起こりにくく、排水性も高い。大規模洪水時でも直接的な浸水や孤立のリスクはほぼ生じない立地。										[]	[]
		1-18	944.547	発災から88分					標高11.3m前後、平均傾斜0.5%のごく緩やかな高台で、淀川中心部から約1km離れている。周囲の低地部や中心部に比べて水の流入が極めて起こりにくく、排水性も高い。大規模洪水時でも直接的な浸水や孤立のリスクはほぼ生じない立地。										[]	[]
		1-19	944.547	発災から93分					標高11.3m前後、平均傾斜0.5%のごく緩やかな高台で、淀川中心部から約1km離れている。周囲の低地部や中心部に比べて水の流入が極めて起こりにくく、排水性も高い。大規模洪水時でも直接的な浸水や孤立のリスクはほぼ生じない立地。										[]	[]
		1-20	944.547	発災から98分					標高11.3m前後、平均傾斜0.5%のごく緩やかな高台。淀川中心部から約1km離れており、周囲の低地部や中心部に比べて水の流入が極めて起こりにくく、排水性も高い。大規模洪水時でも直接的な浸水や孤立のリスクはほぼ生じない立地。										[]	[]
		1-21	944.547	発災から102分					標高11.3m前後、平均傾斜0.5%のごく緩やかな高台。淀川中心部から約1km離れており、周囲の低地部や中心部に比べて水の流入が極めて起こりにくく、排水性も高い。大規模洪水時でも直接的な浸水や孤立のリスクはほぼ生じない立地。										[]	[]
		1-22	944.547	発災から108分					標高11.3m前後、平均傾斜0.5%のごく緩やかな高台。淀川中心部から約1km離れており、周囲の低地部や中心部に比べて水の流入が極めて起こりにくく、排水性も高い。大規模洪水時でも直接的な浸水や孤立のリスクはほぼ生じない立地。										[]	[]
		1-23	944.547	発災から113分					標高11.3m前後、平均傾斜0.5%のごく緩やかな高台。淀川中心部から約1km離れており、周囲の低地部や中心部に比べて水の流入が極めて起こりにくく、排水性も高い。大規模洪水時でも直接的な浸水や孤立のリスクはほぼ生じない立地。										[]	[]
		1-24	944.547	発災から117分					標高11.3m前後、平均傾斜0.5%のごく緩やかな高台。淀川中心部から約1km離れており、周囲の低地部や中心部に比べて水の流入が極めて起こりにくく、排水性も高い。大規模洪水時でも直接的な浸水や孤立のリスクはほぼ生じない立地。										[]	[]
		1-25	944.547	発災から123分					標高11.3m前後、平均傾斜0.5%のごく緩やかな高台で、淀川中心部から約1km離れている。周囲の低地部や中心部に比べて水の流入が極めて起こりにくく、排水性も高い。大規模洪水時でも直接的な浸水や孤立のリスクはほぼ生じない立地。										[]	[]
		1-26	944.547	発災から130分					標高11.3m前後、平均傾斜0.5%のごく緩やかな高台。淀川中心部から約1km離れており、周囲の低地部や中心部に比べて水の流入が極めて起こりにくく、排水性も高い。大規模洪水時でも直接的な浸水や孤立のリスクはほぼ生じない立地。										[]	[]
		1-27	944.547	発災から135分					標高11.3m前後、平均傾斜0.5%のごく緩やかな高台。淀川中心部から約1km離れており、周囲の低地部や中心部に比べて水の流入が極めて起こりにくく、排水性も高い。大規模洪水時でも直接的な浸水や孤立のリスクはほぼ生じない立地。										[]	[]
		1-28	944.547	発災から139分					標高11.3m前後、平均傾斜0.5%のごく緩やかな高台。淀川中心部から約1km離れており、周囲の低地部や中心部に比べて水の流入が極めて起こりにくく、排水性も高い。大規模洪水時でも直接的な浸水や孤立のリスクはほぼ生じない立地。										[]	[]
		1-29	944.547	発災から144分					標高11.3m前後、平均傾斜0.5%のごく緩やかな高台。淀川中心部から約1km離れており、周囲の低地部や中心部に比べて水の流入が極めて起こりにくく、排水性も高い。大規模洪水時でも直接的な浸水や孤立のリスクはほぼ生じない立地。										[]	[]
		1-30	944.547	発災から147分					標高11.3m前後、平均傾斜0.5%のごく緩やかな高台。淀川中心部から約1km離れており、周囲の低地部や中心部に比べて水の流入が極めて起こりにくく、排水性も高い。大規模洪水時でも直接的な浸水や孤立のリスクはほぼ生じない立地。										[]	[]
		1-31	944.547	発災から154分					標高11.3m前後、平均傾斜0.5%のごく緩やかな高台で、淀川氾濫中心部から約1km離れている。周辺の低地部や中心部に比べて水の流入が極めて起こりにくく、排水性も高い。大規模洪水時でも直接的な浸水や孤立のリスクはほぼ生じない立地。										[]	[]
		1-32	944.547	発災から159分					標高11.3m前後、平均傾斜0.5%のごく緩やかな高台で、淀川氾濫中心部から約1km離れている。周辺の低地部や中心部に比べて水の流入が極めて起こりにくく、排水性も高い。大規模洪水時でも直接的な浸水や孤立のリスクはほぼ生じない立地。										[]	[]
		1-33	944.547	発災から162分					標高11.3m前後、平均傾斜0.5%のごく緩やかな高台で、淀川氾濫中心部から約1km離れている。周辺の低地部や中心部に比べて水の流入が極めて起こりにくく、排水性も高い。大規模洪水時でも直接的な浸水や孤立のリスクはほぼ生じない立地。										[]	[]
		1-34	944.547	発災から167分					標高11.3m前後、平均傾斜0.5%のごく緩やかな高台で、淀川氾濫中心部から約1km離れている。周囲の低地部や中心部に比べて水の流入が極めて起こりにくく、排水性も高い。大規模洪水時でも直接的な浸水や孤立のリスクはほぼ生じない立地。										[]	[]
		1-35	944.547	発災から171分					標高11.3m前後、平均傾斜0.5%のごく緩やかな高台。淀川中心部から約1km離れており、周囲の低地部や中心部に比べて水の流入が極めて起こりにくく、排水性も高い。大規模洪水時でも直接的な浸水や孤立のリスクはほぼ生じない立地。										[]	[]
		1-36	944.547	発災から177分					標高11.3m前後、平均傾斜0.5%のごく緩やかな高台で、淀川氾濫中心部から約1km離れている。周辺の低地部や中心部に比べて水の流入が極めて起こりにくく、排水性も高い。大規模洪水時でも直接的な浸水や孤立のリスクはほぼ生じない立地。										[]	[]
		1-37	944.547	発災から184分					標高11.3m前後、平均傾斜0.5%のごく緩やかな高台で、淀川氾濫中心部から約1km離れている。周辺の低地部や中心部に比べて水の流入が極めて起こりにくく、排水性も高い。大規模洪水時でも直接的な浸水や孤立のリスクはほぼ生じない立地。										[]	[]

## Sheet: 枚方市西招提町2173
評価	備考	シナリオID	災害の中心からの距離[m]	イベント発生時刻	付与内容	情報源	状況付与内容	補足情報	地形情報や想定想定される被害の特徴	訓練効果・狙い	判断ポイント	期待される対応行動	想定される課題	水位状況	被害の種類	詳細な被害状況	想定される対策	類似の過去事例(あれば記載)	直近のリスク	二次的なリスク
		1-1	1347.54	発災から5分					標高約14.2m、淀川氾濫想定域の中でもやや高台に位置し、平均傾斜0.4%と非常に緩やか。中心部から約1.3km離れており、周辺の低地部に比べ水の流入や滞留のリスクはかなり低い。地形的に洪水の直接被害が生じる可能性は低い。										[]	[]
		1-2	1347.54	発災から10分					標高約14.2m、平均傾斜0.4%の緩やかな高台で、淀川氾濫想定域の外縁に位置する。中心部や低地部に比べて水の流入・滞留リスクは非常に低い。地形的に洪水の直接被害はほぼ生じない。										[]	[]
		1-3	1347.54	発災から12分					標高約14.2m、平均傾斜0.4%の緩やかな高台で、淀川氾濫想定域の外縁に位置する。中心部や低地部に比べて水の流入・滞留リスクは非常に低い。地形的に洪水の直接被害はほぼ生じない。										[]	[]
		1-4	1347.54	発災から18分					標高約14.2m、平均傾斜0.4%の緩やかな高台で、淀川氾濫想定域の外縁に位置する。中心部や低地部に比べて水の流入・滞留リスクは非常に低い。地形的に洪水の直接被害はほぼ生じない。										[]	[]
		1-5	1347.54	発災から25分					標高約14.2m、平均傾斜0.4%と非常に緩やかな高台。淀川氾濫想定域の外縁で、中心部や低地部より水の流入・滞留リスクは極めて低い。周辺の被害進行状況から見ても、この地点では洪水の直接的な影響はほぼ生じない。										[]	[]
		1-6	1347.54	発災から27分					標高約14.2m、平均傾斜0.4%の緩やかな高台で、淀川氾濫想定域の外縁に位置する。中心部や低地部に比べて水の流入・滞留リスクは非常に低い。地形的に洪水の直接被害はほぼ生じない。										[]	[]
		1-7	1347.54	発災から34分					標高約14.2m、平均傾斜0.4%の緩やかな高台で、淀川氾濫想定域の外縁に位置する。中心部や低地部に比べて水の流入・滞留リスクは非常に低い。地形的に洪水の直接被害はほぼ生じない。										[]	[]
		1-8	1347.54	発災から38分					標高約14.2m、平均傾斜0.4%の緩やかな高台。淀川氾濫想定域の外縁部に位置し、中心部や低地部に比べて水の流入・滞留リスクは極めて低い。周辺の浸水進行状況から見ても、この地点では洪水の直接的な影響はほぼ生じない。										[]	[]
		1-9	1347.54	発災から44分					標高約14.2m、平均傾斜0.4%の緩やかな高台。淀川氾濫想定域の外縁部に位置し、中心部や低地部に比べて水の流入・滞留リスクは極めて低い。周辺の浸水進行状況から見ても、この地点では洪水の直接的な影響はほぼ生じない。										[]	[]
		1-10	1347.54	発災から49分					標高約14.2m、平均傾斜0.4%の緩やかな高台で、淀川氾濫想定域の外縁に位置する。中心部や低地部の住宅地と比較して水の流入・滞留リスクは極めて低い。周辺の低地部で大規模な浸水・孤立が進行していても、この地点では地形的に洪水の直接的な影響はほぼ生じない。										[]	[]
		1-11	1347.54	発災から55分					標高約14.2m、平均傾斜0.4%の緩やかな高台。淀川氾濫想定域の外縁に位置し、中心部や低地部と比較して水の流入・滞留リスクは極めて低い。周辺の低地部で浸水・孤立が進行していても、この地点では地形的に洪水の直接的な影響はほぼ生じない。										[]	[]
		1-12	1347.54	発災から56分					標高約14.2m、平均傾斜0.4%の緩やかな高台。淀川氾濫想定域の外縁に位置し、中心部や低地部に比べて水の流入・滞留リスクは非常に低い。地形的に洪水の直接被害はほぼ生じない。										[]	[]
		1-13	1347.54	発災から64分					標高約14.2m、平均傾斜0.4%の緩やかな高台。淀川氾濫想定域の外縁に位置し、中心部や低地部に比べて水の流入・滞留リスクは極めて低い。周辺の浸水進行状況から見ても、この地点では洪水の直接的な影響はほぼ生じない。										[]	[]
		1-14	1347.54	発災から66分					標高約14.2m、平均傾斜0.4%の緩やかな高台。淀川氾濫想定域の外縁部に位置し、中心部や低地部に比べて水の流入・滞留リスクは極めて低い。周辺の浸水進行状況から見ても、この地点では洪水の直接的な影響はほぼ生じない。										[]	[]
		1-15	1347.54	発災から75分					標高約14.2m、平均傾斜0.4%の緩やかな高台。淀川氾濫想定域の外縁部に位置し、周辺の低地部で大規模な浸水や孤立が発生している段階でも、この地点は地形的に水の流入・滞留リスクが極めて低い。実際の浸水進行や被害も見られない。										[]	[]
		1-16	1347.54	発災から79分					標高約14.2m、平均傾斜0.4%の緩やかな高台。淀川氾濫想定域の外縁部に位置し、中心部や低地部で大規模な浸水・孤立が発生し撤収段階に入っているが、この地点は地形的に水の流入・滞留リスクが極めて低い。実際の浸水進行や被害も見られない。										[]	[]
		1-17	1347.54	発災から83分					標高約14.2m、平均傾斜0.4%の緩やかな高台。淀川氾濫想定域の外縁部に位置し、中心部や低地部で大規模な浸水・孤立が発生し撤収段階に入っているが、この地点は地形的に水の流入・滞留リスクが極めて低い。実際の浸水進行や被害も見られない。										[]	[]
		1-18	1347.54	発災から87分					標高約14.2m、平均傾斜0.4%の緩やかな高台。淀川氾濫想定域の外縁部に位置し、中心部や低地部で大規模な浸水・孤立・救助活動が終息し現場閉鎖段階に入っているが、この地点は地形的に水の流入・滞留リスクが極めて低い。実際の浸水進行や被害も見られない。										[]	[]
		1-19	1347.54	発災から94分					標高約14.2m、平均傾斜0.4%の緩やかな高台。淀川氾濫想定域の外縁部に位置し、中心部や低地部で大規模な浸水・孤立・救助活動が終息し現場閉鎖段階に入っているが、この地点は地形的に水の流入・滞留リスクが極めて低い。実際の浸水進行や被害も見られない。										[]	[]
		1-20	1347.54	発災から99分					標高約14.2m、平均傾斜0.4%の非常に緩やかな高台。淀川氾濫想定域の外縁部に位置し、中心部や低地部での長時間浸水・孤立・救助活動や現場閉鎖が終息した段階でも、この地点は地形的に水の流入・滞留リスクが極めて低い。実際の浸水進行や被害も見られない。										[]	[]
		1-21	1347.54	発災から105分					標高約14.2m、平均傾斜0.4%の非常に緩やかな高台。淀川氾濫想定域の外縁部に位置し、中心部や低地部での長時間浸水・孤立・救助活動や現場閉鎖が終息した段階でも、この地点は地形的に水の流入・滞留リスクが極めて低い。実際の浸水進行や被害も見られない。										[]	[]
		1-22	1347.54	発災から109分					標高約14.2m、平均傾斜0.4%の非常に緩やかな高台。淀川氾濫想定域の外縁部に位置し、中心部や低地部での長時間浸水・孤立・救助活動や現場閉鎖が終息した段階でも、この地点は地形的に水の流入・滞留リスクが極めて低い。実際の浸水進行や被害も見られない。										[]	[]
		1-23	1347.54	発災から115分					標高約14.2m、平均傾斜0.4%の非常に緩やかな高台。淀川氾濫想定域の外縁部に位置し、中心部や低地部での長時間浸水・孤立・救助活動や現場閉鎖が終息した段階でも、この地点は地形的に水の流入・滞留リスクが極めて低い。実際の浸水進行や被害も見られない。										[]	[]
		1-24	1347.54	発災から119分					標高約14.2m、平均傾斜0.4%の非常に緩やかな高台。淀川氾濫想定域の外縁部に位置し、中心部や低地部での長時間浸水・孤立・救助活動や現場閉鎖が終息した段階でも、この地点は地形的に水の流入・滞留リスクが極めて低い。実際の浸水進行や被害も見られない。										[]	[]
		1-25	1347.54	発災から122分					標高約14.2m、平均傾斜0.4%の非常に緩やかな高台。淀川氾濫想定域の外縁部に位置し、中心部や低地部での長時間浸水・孤立・救助活動や現場閉鎖が終息した段階でも、この地点は地形的に水の流入・滞留リスクが極めて低い。実際の浸水進行や被害も見られない。										[]	[]
		1-26	1347.54	発災から128分					標高約14.2m、平均傾斜0.4%の非常に緩やかな高台。淀川氾濫想定域の外縁部に位置し、中心部や低地部での長時間浸水・孤立・救助活動や現場閉鎖が終息した段階でも、この地点は地形的に水の流入・滞留リスクが極めて低い。実際の浸水進行や被害も見られない。										[]	[]
		1-27	1347.54	発災から133分					標高約14.2m、平均傾斜0.4%の非常に緩やかな高台。淀川氾濫想定域の外縁部に位置し、中心部や低地部での長時間浸水・孤立・救助活動や現場閉鎖が終息した段階でも、この地点は地形的に水の流入・滞留リスクが極めて低い。実際の浸水進行や被害も見られない。										[]	[]
		1-28	1347.54	発災から140分					標高約14.2m、平均傾斜0.4%の緩やかな高台。淀川氾濫想定域の外縁部に位置し、中心部や低地部での長時間浸水・孤立・救助活動や現場閉鎖が終息した段階でも、この地点は地形的に水の流入・滞留リスクが極めて低い。実際の浸水進行や被害も見られない。										[]	[]
		1-29	1347.54	発災から142分					標高約14.2m、平均傾斜0.4%の非常に緩やかな高台。淀川氾濫想定域の外縁部に位置し、中心部や低地部での長時間浸水・孤立・救助活動や現場閉鎖が終息した段階でも、この地点は地形的に水の流入・滞留リスクが極めて低い。実際の浸水進行や被害も見られない。										[]	[]
		1-30	1347.54	発災から147分					標高約14.2m、平均傾斜0.4%の非常に緩やかな高台。淀川氾濫想定域の外縁部に位置し、中心部や低地部での長時間浸水・孤立・救助活動や現場閉鎖が終息した段階でも、この地点は地形的に水の流入・滞留リスクが極めて低い。実際の浸水進行や被害も見られない。										[]	[]
		1-31	1347.54	発災から152分					標高約14.2m、平均傾斜0.4%の非常に緩やかな高台。淀川氾濫想定域の外縁部に位置し、中心部や低地部での長時間浸水・孤立・救助活動や避難所での健康被害が継続していても、この地点は地形的に水の流入・滞留リスクが極めて低い。実際の浸水進行や被害も見られない。										[]	[]
		1-32	1347.54	発災から156分					標高約14.2m、平均傾斜0.4%のごく緩やかな高台。淀川氾濫想定域の外縁部に位置し、中心部や低地部で長時間浸水・孤立・避難所での健康被害が継続していても、この地点は地形的に水の流入・滞留リスクが極めて低い。実際の浸水進行や被害も見られない。										[]	[]
		1-33	1347.54	発災から163分					標高約14.2m、平均傾斜0.4%のごく緩やかな高台。淀川氾濫想定域の外縁部に位置し、中心部や低地部で長時間浸水・孤立・避難所での健康被害が継続していても、この地点は地形的に水の流入・滞留リスクが極めて低い。実際の浸水進行や被害も見られない。										[]	[]
		1-34	1347.54	発災から170分					標高約14.2m、平均傾斜0.4%の緩やかな高台。淀川氾濫想定域の外縁部に位置し、中心部や低地部で長時間浸水・孤立・避難所での健康被害が継続していても、この地点は地形的に水の流入・滞留リスクが極めて低い。実際の浸水進行や被害も見られない。										[]	[]
		1-35	1347.54	発災から171分					標高約14.2m、平均傾斜0.4%の緩やかな高台。淀川氾濫想定域の外縁に位置し、中心部や低地部で長時間浸水・孤立・避難所での健康被害が継続していても、この地点は地形的に水の流入・滞留リスクが極めて低い。実際の浸水進行や被害も見られない。										[]	[]
		1-36	1347.54	発災から177分					標高約14.2m、平均傾斜0.4%のごく緩やかな高台。淀川氾濫想定域の外縁部に位置し、中心部や低地部で長時間浸水・孤立・避難所での健康被害が継続していても、この地点は地形的に水の流入・滞留リスクが極めて低い。実際の浸水進行や被害も見られない。										[]	[]
		1-37	1347.54	発災から182分					標高約14.2m、平均傾斜0.4%のごく緩やかな高台で、淀川氾濫中心部から約1.3km離れている。周辺の低地部や中心部に比べて水の流入・滞留リスクは極めて低い。大規模洪水時でも直接的な浸水や孤立のリスクはほぼ生じない立地。										[]	[]

## Sheet: 枚方市楠葉中町52
評価	備考	シナリオID	災害の中心からの距離[m]	イベント発生時刻	付与内容	情報源	状況付与内容	補足情報	地形情報や想定想定される被害の特徴	訓練効果・狙い	判断ポイント	期待される対応行動	想定される課題	水位状況	被害の種類	詳細な被害状況	想定される対策	類似の過去事例(あれば記載)	直近のリスク	二次的なリスク
		1-1	1414.89	発災から5分					標高約15.1m、周辺地域と比較してやや高台に位置し、平均傾斜1.1%とごく緩やか。淀川から約1.4km離れており、中心部や低地部に比べて洪水の直接的な浸水リスクは低い。地形的に水の滞留や流入は発生しにくい。										[]	[]
		1-2	1414.89	発災から9分					標高約15.1m、周辺地域より高台で平均傾斜1.1%とごく緩やか。淀川から約1.4km離れており、洪水氾濫流が直接到達しにくい立地。地形的に水の滞留や流入リスクは極めて低い。										[]	[]
		1-3	1414.89	発災から11分					標高約15.1m、周辺より明らかに高台で平均傾斜1.1%とごく緩やか。淀川から約1.4km離れており、洪水氾濫流が直接到達しにくい。地形的に水の滞留や流入はほぼ発生しない。										[]	[]
		1-4	1414.89	発災から16分					標高約15.1m、周辺地域より明らかに高台で、平均傾斜1.1%とごく緩やか。淀川から約1.4km離れており、低地部での洪水被害が顕著な段階でも、この地点では水の流入・滞留リスクは極めて低い。地形的に洪水氾濫流が到達しにくい立地。										[]	[]
		1-5	1414.89	発災から24分					標高約15.1m、周辺より明らかに高台で、平均傾斜1.1%とごく緩やか。淀川から約1.4km離れており、中心部や低地部の被害進行段階でも洪水氾濫流が直接到達しにくい立地。地形的に水の滞留や流入は発生しにくい。										[]	[]
		1-6	1414.89	発災から26分					標高約15.1m、周辺より明らかに高台で、平均傾斜1.1%とごく緩やか。淀川から約1.4km離れており、低地部・中心部の被害進行段階でも洪水氾濫流が直接到達しにくい立地。地形的に水の滞留や流入は発生しにくい。										[]	[]
		1-7	1414.89	発災から34分					標高約15.1m、周辺より明らかに高台で、平均傾斜1.1%とごく緩やか。淀川から約1.4km離れており、中心部や低地部の被害が拡大している段階でも洪水氾濫流が直接到達しにくい立地。地形的に水の滞留や流入は発生しにくい。										[]	[]
		1-8	1414.89	発災から37分					標高約15.1m、周辺より明らかに高台で、平均傾斜1.1%とごく緩やか。淀川から約1.4km離れており、中心部や低地部の被害が拡大している段階でも洪水氾濫流が直接到達しにくい立地。地形的に水の滞留や流入は発生しにくい。										[]	[]
		1-9	1414.89	発災から42分					標高約15.1m、周辺より明らかに高台で、平均傾斜1.1%とごく緩やか。淀川から約1.4km離れており、中心部や低地部の被害が拡大している段階でも洪水氾濫流が直接到達しにくい立地。地形的に水の滞留や流入は発生しにくい。										[]	[]
		1-10	1414.89	発災から47分					標高約15.1m、周辺より明らかに高台で、平均傾斜1.1%とごく緩やか。淀川から約1.4km離れており、中心部や低地部の被害拡大段階でも洪水氾濫流が直接到達しにくい立地。地形的に水の滞留や流入は発生しにくい。										[]	[]
		1-11	1414.89	発災から51分					標高約15.1m、周辺より明らかに高台で、平均傾斜1.1%とごく緩やか。淀川から約1.4km離れており、中心部や低地部の被害拡大段階でも洪水氾濫流が直接到達しにくい立地。地形的に水の滞留や流入は発生しにくい。										[]	[]
		1-12	1414.89	発災から56分					標高約15.1m、周辺より明らかに高台で、平均傾斜1.1%とごく緩やか。淀川から約1.4km離れており、中心部や低地部の被害拡大段階でも洪水氾濫流が直接到達しにくい立地。地形的に水の滞留や流入は発生しにくい。										[]	[]
		1-13	1414.89	発災から63分					標高約15.1m、周辺より明らかに高台で、平均傾斜1.1%とごく緩やか。淀川から約1.4km離れており、中心部や低地部の被害拡大段階でも洪水氾濫流が直接到達しにくい立地。地形的に水の滞留や流入は発生しにくい。										[]	[]
		1-14	1414.89	発災から70分					標高約15.1m、周辺より明らかに高台で、平均傾斜1.1%とごく緩やか。淀川から約1.4km離れており、中心部や低地部の洪水被害が拡大している段階でも、この地点は地形的に水の滞留や流入リスクが極めて低い。実際の浸水進行も見られない。										[]	[]
		1-15	1414.89	発災から73分					標高約15.1m、周辺より明らかに高台で、平均傾斜1.1%とごく緩やか。淀川から約1.4km離れており、中心部や低地部の洪水被害が拡大している段階でも、この地点は地形的に水の滞留や流入リスクが極めて低い。実際の浸水進行も見られない。										[]	[]
		1-16	1414.89	発災から76分					標高約15.1m、周辺より明らかに高台で、平均傾斜1.1%とごく緩やか。淀川から約1.4km離れており、中心部や低地部の洪水被害が拡大している段階でも、この地点は地形的に水の滞留や流入リスクが極めて低い。実際の浸水進行も見られない。										[]	[]
		1-17	1414.89	発災から85分					標高約15.1m、周辺より明らかに高台で、平均傾斜1.1%とごく緩やか。淀川から約1.4km離れており、中心部や低地部の洪水被害が拡大している段階でも、この地点は地形的に水の滞留や流入リスクが極めて低い。実際の浸水進行も見られない。										[]	[]
		1-18	1414.89	発災から90分					標高約15.1m、周辺より明らかに高台で、平均傾斜1.1%とごく緩やか。淀川から約1.4km離れており、中心部や低地部が大規模な浸水・孤立・救助活動の終息・現場閉鎖段階に入っているが、この地点は地形的に水の滞留や流入リスクが極めて低い。実際の浸水進行や被害も見られない。										[]	[]
		1-19	1414.89	発災から91分					標高約15.1m、周辺より明らかに高台で、平均傾斜1.1%とごく緩やか。淀川から約1.4km離れており、中心部や低地部が長時間浸水・孤立・救助活動の終息・現場閉鎖段階に入っているが、この地点は地形的に水の滞留や流入リスクが極めて低い。実際の浸水進行や被害も見られない。										[]	[]
		1-20	1414.89	発災から97分					標高約15.1m、周辺より明らかに高台で、平均傾斜1.1%とごく緩やか。淀川から約1.4km離れており、中心部や低地部が長時間浸水・孤立・救助活動の終息・現場閉鎖段階に入っているが、この地点は地形的に水の滞留や流入リスクが極めて低い。実際の浸水進行や被害も見られない。										[]	[]
		1-21	1414.89	発災から102分					標高約15.1m、周辺より明らかに高台で、平均傾斜1.1%とごく緩やか。淀川から約1.4km離れており、中心部や低地部が長時間浸水・孤立・救助活動の終息・現場閉鎖段階に入っているが、この地点は地形的に水の滞留や流入リスクが極めて低い。実際の浸水進行や被害も見られない。										[]	[]
		1-22	1414.89	発災から107分					標高約15.1mで、周辺より明らかに高台。平均傾斜1.1%とごく緩やかで、淀川から約1.4km離れている。中心部や低地部での長時間浸水・孤立・救助活動や現場閉鎖が終息した段階でも、この地点は地形的に水の滞留や流入リスクが極めて低い。実際の浸水進行や被害も見られない。										[]	[]
		1-23	1414.89	発災から112分					標高約15.1m、周辺より明らかに高台で、平均傾斜1.1%とごく緩やか。淀川から約1.4km離れており、中心部や低地部の長時間浸水・孤立・救助活動や現場閉鎖が終息した段階でも、この地点は地形的に水の滞留や流入リスクが極めて低い。実際の浸水進行や被害も見られない。										[]	[]
		1-24	1414.89	発災から118分					標高約15.1m、周辺より明らかに高台で、平均傾斜1.1%とごく緩やか。淀川から約1.4km離れており、中心部や低地部の長時間浸水・孤立・救助活動や現場閉鎖が終息した段階でも、この地点は地形的に水の滞留や流入リスクが極めて低い。実際の浸水進行や被害も見られない。										[]	[]
		1-25	1414.89	発災から125分					標高約15.1m、周辺より明らかに高台で、平均傾斜1.1%とごく緩やか。淀川から約1.4km離れており、中心部や低地部の長時間浸水・孤立・救助活動や現場閉鎖が終息した段階でも、この地点は地形的に水の滞留や流入リスクが極めて低い。実際の浸水進行や被害も見られない。										[]	[]
		1-26	1414.89	発災から126分					標高約15.1m、周辺より明らかに高台で、平均傾斜1.1%とごく緩やか。淀川から約1.4km離れており、中心部や低地部の長時間浸水・孤立・救助活動や現場閉鎖が終息した段階でも、この地点は地形的に水の滞留や流入リスクが極めて低い。実際の浸水進行や被害も見られない。										[]	[]
		1-27	1414.89	発災から132分					標高約15.1m、周辺地域より明らかに高台で、平均傾斜1.1%とごく緩やか。淀川から約1.4km離れており、中心部や低地部の長時間浸水・孤立・救助活動や現場閉鎖が終息した段階でも、この地点は地形的に水の滞留や流入リスクが極めて低い。実際の浸水進行や被害も見られない。										[]	[]
		1-28	1414.89	発災から140分					標高約15.1m、周辺より明らかに高台で、平均傾斜1.1%とごく緩やか。淀川から約1.4km離れており、中心部や低地部の長時間浸水・孤立・救助活動や現場閉鎖が終息した段階でも、この地点は地形的に水の滞留や流入リスクが極めて低い。実際の浸水進行や被害も見られない。										[]	[]
		1-29	1414.89	発災から144分					標高約15.1m、周辺より明らかに高台で、平均傾斜1.1%とごく緩やか。淀川から約1.4km離れており、中心部や低地部の長時間浸水・孤立・救助活動や現場閉鎖が終息した段階でも、この地点は地形的に水の滞留や流入リスクが極めて低い。実際の浸水進行や被害も見られない。										[]	[]
		1-30	1414.89	発災から146分					標高約15.1m、周辺より明らかに高台で、平均傾斜1.1%とごく緩やか。淀川から約1.4km離れており、中心部や低地部の長時間浸水・孤立・救助活動や現場閉鎖が終息した段階でも、この地点は地形的に水の滞留や流入リスクが極めて低い。実際の浸水進行や被害も見られない。										[]	[]
		1-31	1414.89	発災から151分					標高約15.1m、周辺より明らかに高台で、平均傾斜1.1%とごく緩やか。淀川から約1.4km離れており、中心部や低地部の長時間浸水・孤立・救助活動や避難所での健康被害が継続していても、この地点は地形的に水の滞留や流入リスクが極めて低い。実際の浸水進行や被害も見られない。										[]	[]
		1-32	1414.89	発災から159分					標高約15.1m、周辺より明らかに高台で、平均傾斜1.1%とごく緩やか。淀川から約1.4km離れており、中心部や低地部の長時間浸水・孤立・避難所での健康被害が継続していても、この地点は地形的に水の滞留や流入リスクが極めて低い。実際の浸水進行や被害も見られない。										[]	[]
		1-33	1414.89	発災から164分					標高約15.1m、周辺より明らかに高台で、平均傾斜1.1%とごく緩やか。淀川から約1.4km離れており、中心部や低地部の長時間浸水・孤立・避難所での健康被害が継続していても、この地点は地形的に水の滞留や流入リスクが極めて低い。実際の浸水進行や被害も見られない。										[]	[]
		1-34	1414.89	発災から170分					標高約15.1m、周辺より明らかに高台で、平均傾斜1.1%とごく緩やか。淀川から約1.4km離れており、中心部や低地部の長時間浸水・孤立・避難所での健康被害が継続していても、この地点は地形的に水の滞留や流入リスクが極めて低い。実際の浸水進行や被害も見られない。										[]	[]
		1-35	1414.89	発災から175分					標高約15.1m、周辺より明らかに高台で、平均傾斜1.1%とごく緩やか。淀川から約1.4km離れており、中心部や低地部の長時間浸水・孤立・避難所での健康被害が継続していても、この地点は地形的に水の滞留や流入リスクが極めて低い。実際の浸水進行や被害も見られない。										[]	[]
		1-36	1414.89	発災から177分					標高約15.1m、周辺より明らかに高台で、平均傾斜1.1%とごく緩やか。淀川から約1.4km離れており、中心部や低地部の長時間浸水・孤立・避難所での健康被害が継続していても、この地点は地形的に水の滞留や流入リスクが極めて低い。実際の浸水進行や被害も見られない。										[]	[]
		1-37	1414.89	発災から185分					標高約15.1m、周辺より明らかに高台で、平均傾斜1.1%とごく緩やか。淀川から約1.4km離れており、中心部や低地部の長時間浸水・孤立・避難所での健康被害が継続していても、この地点は地形的に水の滞留や流入リスクが極めて低い。実際の浸水進行や被害も見られない。										[]	[]

## Sheet: 枚方市養父東町10
評価	備考	シナリオID	災害の中心からの距離[m]	イベント発生時刻	付与内容	情報源	状況付与内容	補足情報	地形情報や想定想定される被害の特徴	訓練効果・狙い	判断ポイント	期待される対応行動	想定される課題	水位状況	被害の種類	詳細な被害状況	想定される対策	類似の過去事例(あれば記載)	直近のリスク	二次的なリスク
		1-1	1463.54	発災から5分					標高約13.8m、平均傾斜1.0%と周辺よりやや高台に位置し、中心部から約1.5km離れている。淀川氾濫の想定浸水区域外縁であり、低地部より浸水リスクはかなり低い。地形的に水の流入や滞留が発生しにくい。										[]	[]
		1-2	1463.54	発災から6分					標高約13.8m、平均傾斜1.0%のやや高台。淀川氾濫の浸水想定区域外縁にあたり、低地部よりも明らかに水の流入・滞留リスクが低い。中心部から約1.5km離れており、洪水被害の直接的影響は考えにくい。										[]	[]
		1-3	1463.54	発災から13分					標高約13.8m、平均傾斜1.0%のやや高台。淀川氾濫の浸水想定区域外縁であり、低地部よりも明らかに水の流入・滞留リスクが低い。中心部から約1.5km離れており、洪水被害の直接的影響は考えにくい。										[]	[]
		1-4	1463.54	発災から19分					標高約13.8m、平均傾斜1.0%のやや高台。淀川氾濫の浸水想定区域外縁であり、低地部よりも明らかに水の流入・滞留リスクが低い。中心部から約1.5km離れており、洪水被害の直接的影響は考えにくい。										[]	[]
		1-5	1463.54	発災から25分					標高約13.8m、平均傾斜1.0%のやや高台。淀川氾濫の浸水想定区域外縁であり、低地部よりも明らかに水の流入・滞留リスクが低い。中心部から約1.5km離れており、洪水被害の直接的影響は考えにくい。										[]	[]
		1-6	1463.54	発災から29分					標高約13.8m、平均傾斜1.0%のやや高台。中心部から約1.5km離れており、淀川氾濫の浸水想定区域外縁に位置。低地部に比べて明らかに水の流入・滞留リスクが低く、洪水被害の直接的影響は考えにくい。										[]	[]
		1-7	1463.54	発災から35分					標高約13.8m、平均傾斜1.0%のやや高台。中心部から約1.5km離れており、淀川氾濫の浸水想定区域外縁に位置。低地部に比べて明らかに水の流入・滞留リスクが低く、洪水被害の直接的影響は考えにくい。										[]	[]
		1-8	1463.54	発災から39分					標高約13.8m、平均傾斜1.0%のやや高台。淀川氾濫の直接影響域から約1.5km離れており、既に中心部や低地部で大規模浸水・屋根上避難が発生している状況下でも、地形的に水の流入・滞留リスクは低い。実際の浸水進行も確認されていない。										[]	[]
		1-9	1463.54	発災から42分					標高約13.8m、平均傾斜1.0%のやや高台。淀川氾濫の浸水想定区域外縁であり、中心部や低地部での大規模浸水・屋根上避難が進行している段階でも、この地点は地形的に水の流入・滞留リスクが極めて低い。実際の浸水進行も確認されていない。										[]	[]
		1-10	1463.54	発災から46分					標高約13.8m、平均傾斜1.0%のやや高台。淀川氾濫の浸水想定区域外縁に位置し、中心部から約1.5km離れているため、周辺低地部で大規模な浸水・孤立が進行していても、この地点では水の流入・滞留リスクは極めて低い。										[]	[]
		1-11	1463.54	発災から55分					標高約13.8m、平均傾斜1.0%のやや高台。淀川氾濫の浸水想定区域外縁に位置し、中心部から約1.5km離れている。周辺の低地部や中心部で大規模な浸水や孤立が発生していても、この地点は地形的に水の流入・滞留リスクが極めて低い。実際の浸水進行も確認されていない。										[]	[]
		1-12	1463.54	発災から59分					標高約13.8m、平均傾斜1.0%のやや高台。淀川氾濫の浸水想定区域外縁に位置し、中心部から約1.5km離れている。周辺低地部や中心部で大規模な浸水・孤立が継続している段階でも、この地点は地形的に水の流入・滞留リスクが極めて低い。実際の浸水進行も確認されていない。										[]	[]
		1-13	1463.54	発災から61分					標高約13.8m、平均傾斜1.0%のやや高台。淀川氾濫の浸水想定区域外縁に位置し、中心部から約1.5km離れている。周辺低地部や中心部で大規模な浸水・孤立が継続している段階でも、この地点は地形的に水の流入・滞留リスクが極めて低い。実際の浸水進行も確認されていない。										[]	[]
		1-14	1463.54	発災から69分					標高約13.8m、平均傾斜1.0%のやや高台。淀川氾濫の浸水想定区域外縁に位置し、中心部から約1.5km離れている。周辺低地部や中心部で大規模な浸水・孤立が継続している段階でも、この地点は地形的に水の流入・滞留リスクが極めて低い。実際の浸水進行も確認されていない。										[]	[]
		1-15	1463.54	発災から75分					標高約13.8m、平均傾斜1.0%のやや高台。淀川氾濫の浸水想定区域外縁に位置し、中心部から約1.5km離れている。周辺低地部や中心部で大規模な浸水・孤立が継続している段階でも、この地点は地形的に水の流入・滞留リスクが極めて低い。実際の浸水進行も確認されていない。										[]	[]
		1-16	1463.54	発災から78分					標高約13.8m、平均傾斜1.0%のやや高台。淀川氾濫の浸水想定区域外縁に位置し、中心部から約1.5km離れている。周辺低地部や中心部で大規模な浸水・孤立が撤収段階に入っているが、この地点は地形的に水の流入・滞留リスクが極めて低い。実際の浸水進行や被害は確認されていない。										[]	[]
		1-17	1463.54	発災から85分					標高約13.8m、平均傾斜1.0%のやや高台。淀川氾濫の浸水想定区域外縁に位置し、中心部から約1.5km離れている。周辺低地部や中心部で大規模な浸水・孤立が撤収段階に入っているが、この地点は地形的に水の流入・滞留リスクが極めて低い。実際の浸水進行や被害は確認されていない。										[]	[]
		1-18	1463.54	発災から88分					標高約13.8m、平均傾斜1.0%のやや高台。淀川氾濫の浸水想定区域外縁に位置し、中心部から約1.5km離れている。周辺低地部や中心部で大規模な浸水・孤立が撤収段階に入っているが、この地点は地形的に水の流入・滞留リスクが極めて低い。実際の浸水進行や被害は確認されていない。										[]	[]
		1-19	1463.54	発災から95分					標高約13.8m、平均傾斜1.0%のやや高台。淀川氾濫の浸水想定区域外縁に位置し、中心部から約1.5km離れている。中心部や低地部では長時間浸水・孤立・救助活動の終息・現場閉鎖段階に入っているが、この地点は地形的に水の流入・滞留リスクが極めて低い。実際の浸水進行や被害も見られない。										[]	[]
		1-20	1463.54	発災から96分					標高約13.8m、平均傾斜1.0%のやや高台。淀川氾濫の浸水想定区域外縁に位置し、中心部から約1.5km離れている。周辺低地部や中心部で大規模な浸水・孤立・救助活動・現場閉鎖が終息した段階でも、この地点は地形的に水の流入・滞留リスクが極めて低い。実際の浸水進行や被害も見られない。										[]	[]
		1-21	1463.54	発災から104分					標高約13.8m、平均傾斜1.0%のやや高台。淀川氾濫の浸水想定区域外縁に位置し、中心部から約1.5km離れている。周辺低地部や中心部で大規模な浸水・孤立・救助活動・現場閉鎖が終息した段階でも、この地点は地形的に水の流入・滞留リスクが極めて低い。実際の浸水進行や被害も見られない。										[]	[]
		1-22	1463.54	発災から110分					標高約13.8m、平均傾斜1.0%のやや高台。淀川氾濫の浸水想定区域外縁に位置し、中心部から約1.5km離れている。中心部や低地部で長時間浸水・孤立・救助活動や現場閉鎖が終息した段階でも、この地点は地形的に水の流入・滞留リスクが極めて低い。実際の浸水進行や被害も見られない。										[]	[]
		1-23	1463.54	発災から111分					標高約13.8m、平均傾斜1.0%のやや高台。淀川氾濫の浸水想定区域外縁に位置し、中心部から約1.5km離れている。中心部や低地部で長時間浸水・孤立・救助活動や現場閉鎖が終息した段階でも、この地点は地形的に水の流入・滞留リスクが極めて低い。実際の浸水進行や被害も見られない。										[]	[]
		1-24	1463.54	発災から117分					標高約13.8m、平均傾斜1.0%のやや高台。淀川氾濫想定区域外縁に位置し、中心部から約1.5km離れている。中心部や低地部で長時間浸水・孤立・救助活動や現場閉鎖が終息した段階でも、この地点は地形的に水の流入・滞留リスクが極めて低い。実際の浸水進行や被害も見られない。										[]	[]
		1-25	1463.54	発災から124分					標高約13.8m、平均傾斜1.0%のやや高台。淀川氾濫の浸水想定区域外縁に位置し、中心部から約1.5km離れている。周辺低地部や中心部で大規模な浸水・孤立・救助活動や現場閉鎖が終息した段階でも、この地点は地形的に水の流入・滞留リスクが極めて低い。実際の浸水進行や被害も見られない。										[]	[]
		1-26	1463.54	発災から129分					標高約13.8m、平均傾斜1.0%のやや高台。淀川氾濫の浸水想定区域外縁に位置し、中心部や低地部での長時間浸水・孤立・救助活動や現場閉鎖が終息した段階でも、この地点は地形的に水の流入・滞留リスクが極めて低い。実際の浸水進行や被害も見られない。										[]	[]
		1-27	1463.54	発災から134分					標高約13.8m、平均傾斜1.0%のやや高台。淀川氾濫の浸水想定区域外縁に位置し、中心部や低地部での長時間浸水・孤立・救助活動や現場閉鎖が終息した段階でも、この地点は地形的に水の流入・滞留リスクが極めて低い。実際の浸水進行や被害も見られない。										[]	[]
		1-28	1463.54	発災から138分					標高約13.8m、平均傾斜1.0%のやや高台。淀川氾濫の浸水想定区域外縁であり、中心部や低地部での長時間浸水・孤立・救助活動や現場閉鎖が終息した段階でも、この地点は地形的に水の流入・滞留リスクが極めて低い。実際の浸水進行や被害も見られない。										[]	[]
		1-29	1463.54	発災から145分					標高約13.8m、平均傾斜1.0%のやや高台。淀川氾濫の浸水想定区域外縁であり、中心部や低地部の長時間浸水・孤立・救助活動や現場閉鎖が終息した段階でも、この地点は地形的に水の流入・滞留リスクが極めて低い。実際の浸水進行や被害も見られない。										[]	[]
		1-30	1463.54	発災から149分					標高約13.8m、平均傾斜1.0%のやや高台。淀川氾濫の浸水想定区域外縁に位置し、中心部から約1.5km離れている。周辺低地部や中心部で大規模な浸水・孤立・救助活動や避難所での健康被害が継続していても、この地点は地形的に水の流入・滞留リスクが極めて低い。実際の浸水進行や被害も見られない。										[]	[]
		1-31	1463.54	発災から153分					標高約13.8m、平均傾斜1.0%のやや高台。淀川氾濫の浸水想定区域外縁に位置し、中心部から約1.5km離れている。周辺低地部や中心部で大規模な浸水・孤立・避難所での健康被害が継続していても、この地点は地形的に水の流入・滞留リスクが極めて低い。実際の浸水進行や被害も見られない。										[]	[]
		1-32	1463.54	発災から157分					標高約13.8m、平均傾斜1.0%のやや高台。淀川氾濫の浸水想定区域外縁に位置し、中心部から約1.5km離れている。周辺低地部や中心部で大規模な浸水・孤立・避難所での健康被害が継続していても、この地点は地形的に水の流入・滞留リスクが極めて低い。実際の浸水進行や被害も見られない。										[]	[]
		1-33	1463.54	発災から162分					標高約13.8m、平均傾斜1.0%のやや高台。淀川氾濫の浸水想定区域外縁に位置し、中心部から約1.5km離れている。周辺低地部や中心部で大規模な浸水・孤立・避難所での健康被害が継続していても、この地点は地形的に水の流入・滞留リスクが極めて低い。実際の浸水進行や被害も見られない。										[]	[]
		1-34	1463.54	発災から167分					標高約13.8m、平均傾斜1.0%のやや高台。淀川氾濫の浸水想定区域外縁に位置し、中心部から約1.5km離れている。周辺低地部や中心部で長時間浸水・孤立・避難所での健康被害が継続していても、この地点は地形的に水の流入・滞留リスクが極めて低い。実際の浸水進行や被害も見られない。										[]	[]
		1-35	1463.54	発災から174分					標高約13.8m、平均傾斜1.0%のやや高台で、淀川氾濫の浸水想定区域外縁に位置。中心部から約1.5km離れており、周辺低地部や中心部で長時間浸水や避難所での健康被害が継続している段階でも、この地点は地形的に水の流入・滞留リスクが極めて低い。実際の浸水進行や被害は見られない。										[]	[]
		1-36	1463.54	発災から176分					標高約13.8m、平均傾斜1.0%のやや高台。淀川氾濫の浸水想定区域外縁に位置し、中心部から約1.5km離れている。周辺低地部や中心部で長時間浸水や避難所での健康被害が継続している段階でも、この地点は地形的に水の流入・滞留リスクが極めて低い。実際の浸水進行や被害は見られない。										[]	[]
		1-37	1463.54	発災から181分					標高約13.8m、平均傾斜1.0%のやや高台。淀川氾濫の浸水想定区域外縁であり、中心部から約1.5km離れている。周辺低地部や中心部では長時間浸水・孤立・避難所での健康被害が続いているが、この地点は地形的に水の流入・滞留リスクが極めて低い。実際の浸水進行や被害も見られない。										[]	[]
