# Supplementary material for: Physically Plausible Scenario Generation via \ Geo-Enhanced LLMs for Disaster Training
Source: Research Square preprint supplement (doi:10.21203/rs.3.rs-7715103/v1), 2025-10-07
Supplement: Supplementary file 2 [file 965b76fc3b54835ae599f0e4.xlsx]

## Sheet: 枚方市楠葉花園町4
評価	備考	シナリオID	(推測)災害の中心からの距離[m]	イベント発生時刻	付与内容	情報源	状況付与内容	補足情報	地形情報や想定想定される被害の特徴	訓練効果・狙い	判断ポイント	期待される対応行動	想定される課題	水位状況	被害の種類	詳細な被害状況	想定される対策	類似の過去事例(あれば記載)	直近のリスク	二次的なリスク
		1-1	0	発災5分後	主要な生活道路の冠水と住宅街への浸水が発生	住民	自宅周辺の道路が急激に冠水し始めており、膝下程度まで水が上がってきている。近隣住民からも複数の通報が入っている。まだ避難できていない高齢者世帯がある。	消防にはまだ連絡していない。冠水している道路名は不明だが、花園町内の南北方向の道とのこと。	淀川に隣接し、地域の標高は低く、河川氾濫時には真っ先に浸水被害が発生しやすい。住宅地が密集し、古い住宅も多い。	初動段階での迅速な情報収集と、要配慮者（高齢者等）の早期避難誘導を訓練する。	住民からの通報情報を的確に把握し、現地の状況確認・避難判断・高齢者等要配慮者の把握と避難支援体制の迅速な立ち上げ。	通報内容の詳細聴取、現地の状況確認班の派遣、要配慮者リストの確認と避難誘導、消防・警察との連携、避難所の開設準備。	冠水による現地確認の遅れ、要配慮者の所在把握困難、複数通報の情報整理、避難誘導時の安全確保、関係機関との情報共有の遅延	道路で膝下程度の冠水、住宅地一部で床下浸水が始まっている	浸水・冠水・避難困難	道路が冠水し、住宅地で床下浸水が始まっている。高齢者世帯で避難が遅れているとの情報あり。車両通行も困難になりつつある。	早期避難指示、要配慮者名簿の活用と個別避難支援、冠水箇所の通行止め措置、消防・警察との連携強化	平成25年台風18号による淀川氾濫時、近隣地域で同様の冠水・浸水被害が発生	['急激な浸水による避難困難', '要配慮者の孤立']	['電気設備の浸水による感電リスク', '交通遮断による救助遅延', '下水道逆流による衛生被害']
		1-2	0	発災7分後	住宅街の複数箇所で床下・一部床上浸水が発生し、避難が困難な高齢者世帯から救助要請が入る	消防	現場到着した消防隊より、花園町4丁目の南側住宅街で床下浸水が拡大し、一部の平屋住宅で床上浸水が始まっているとの報告。高齢者世帯から避難の援助要請があり、消防隊が救助活動を開始しているが、冠水で車両進入が困難な状態。	現場は南北道路沿いの住宅密集エリア。消防は徒歩での救助活動を優先している。警察にも応援要請済み。	淀川に隣接した標高の低い住宅密集地で、南側は特に窪地となり浸水しやすい。排水能力を超えた場合、短時間で床上浸水が発生しやすい。	浸水拡大下での要配慮者救助、現場との連携強化、徒歩救助やボート活用の判断訓練。	消防・警察・行政の連携による迅速な救助活動体制の構築、徒歩・ボート等多様な救助手段の検討、冠水拡大時の現場指揮・安全管理の実践。	消防・警察との情報共有、徒歩またはボートによる救助手段の検討・手配、避難所での受け入れ準備、要配慮者リストの再確認と優先順位付け、現場への追加応援要請。	冠水範囲拡大による救助手段の制限、現場指揮系統の混乱、要配慮者の所在把握遅延、避難所での受け入れ準備の遅れ、住民のパニックや二次被害の発生	住宅街の一部で床下〜床上数cmの浸水、道路は膝上程度の冠水に拡大	床下・床上浸水・避難困難・救助要請	道路冠水がさらに拡大し、住宅街の複数箇所で床下浸水、平屋等の一部で床上浸水が発生。高齢者世帯で避難が困難な住民から救助要請。車両の進入が困難となり、徒歩・ボートでの救助が必要な状況。	早期避難指示の徹底、要配慮者名簿の活用と個別支援、徒歩・ボート等多様な救助手段の準備、消防・警察・行政の現場連携強化、避難所の受け入れ体制強化	平成25年台風18号では、同地区で床上浸水・救助要請・避難所混乱が同時発生した事例あり	['急激な浸水拡大による住民の孤立', '要配慮者の救助遅延', '現場作業員・住民の感電・転倒事故']	['電気設備・ガス設備の浸水による火災・感電リスク', '交通遮断による救助活動の遅延', '下水道逆流による衛生被害', '避難所の受け入れ混乱']
		1-3	0	発災12分後	住宅街の一部で床上浸水が拡大、要配慮者の孤立と停電が発生	警察	警察官が現地確認を行ったところ、花園町4丁目の南側住宅街で床上浸水がさらに拡大しており、複数の家屋で停電が発生。高齢者のみの世帯1軒で住民が2階に避難し孤立しているとの報告。道路は腰程度まで冠水し、車両進入は完全に困難な状態。	現場は住宅密集地で、南北道路沿いに浸水が集中。警察は徒歩で住民の安否確認を継続中。消防・行政にも応援要請済み。	淀川に隣接した標高の低い住宅密集地。南側は特に窪地となり、短時間で浸水拡大・停電・孤立が発生しやすい。排水能力を超えた場合、古い住宅ほど被害が拡大しやすい。	浸水・停電・孤立世帯発生時の現場連携・安否確認・救助判断の訓練。多機関連携による情報整理・優先順位付け・現場指揮体制強化を狙う。	警察・消防・行政による現場情報の迅速な共有、停電・孤立世帯への優先対応、徒歩・ボート等多様な救助手段の検討、現場指揮・安全管理の実践。	現場からの被害・安否情報の本部への速やかな伝達、孤立世帯への救助手段（ボート・徒歩）手配、停電世帯への安全確認と支援、要配慮者の再抽出と優先順位付け、避難所受け入れ体制の再確認、関係機関への追加応援要請。	冠水拡大・停電による情報収集の遅れ、孤立世帯への接近困難、現場指揮系統の混乱、住民のパニック、複数機関間の連携不足、避難所の受け入れ混乱	道路で腰程度の冠水、住宅街の複数箇所で床上10〜20cm浸水、停電発生	床上浸水・停電・孤立・避難困難	床上浸水が複数の家屋で拡大し、停電が発生。高齢者世帯で住民が2階に避難し孤立。道路は腰程度まで冠水し、徒歩・ボート以外での救助は困難な状態。	要配慮者名簿の再確認・個別支援、徒歩・ボート救助の迅速な手配、停電世帯への安否確認、避難所の受け入れ体制強化、現場指揮系統の再確認、警察・消防・行政の連携強化	平成25年台風18号時、同地区で床上浸水・孤立・停電・救助要請が同時発生した事例あり	['床上浸水拡大による住民の孤立', '停電による情報収集・安否確認の遅れ', '要配慮者の救助遅延']	['電気設備・ガス設備の浸水による火災・感電リスク', '交通遮断による救助活動の遅延', '下水道逆流による衛生被害', '避難所の受け入れ混乱']
		1-4	0	発災18分後	床上浸水・停電・孤立世帯がさらに増加、救助活動に支障が出始める	消防	現場に到着した消防隊より、花園町4丁目の南側住宅街で床上浸水がさらに拡大し、孤立世帯が複数に増加。停電範囲も拡大しており、救助活動を続けているが、冠水のため徒歩・ボート以外での接近が困難。追加の救助要請が複数入っている。	孤立が確認されたのは主に高齢者のみの世帯。停電の影響で夜間照明・通信も困難になっている。警察・行政と連携して追加応援要請中。	淀川に隣接した標高の低い住宅密集地。南側が窪地となっており、短時間で浸水・停電・孤立が拡大しやすい。排水能力を超過した状態が続き、古い住宅ほど被害が拡大しやすい。	浸水・停電・孤立拡大時の多機関連携による現場指揮・救助優先順位付け・情報整理の訓練。現場の混乱下での判断力・連携・安全管理能力の向上を狙う。	複数の孤立世帯への対応・救助優先順位付け、停電下での情報・通信確保、徒歩・ボート救助の現場指揮、関係機関間の連携強化、住民の安全確保。	孤立・救助要請世帯のリストアップと優先順位付け、徒歩・ボートによる救助班の再編成・派遣、停電エリアの安全確認と情報伝達手段の確保、避難所受け入れ体制の再強化、警察・行政との連携による追加応援要請、住民への避難再通知。	冠水・停電拡大による現場混乱、孤立世帯への接近困難、現場指揮の混乱、救助要請の同時多発による対応遅延、通信手段の確保困難、避難所の受け入れ混乱	道路で腰上〜胸程度の冠水、住宅街の多数で床上20〜40cm浸水、停電範囲拡大	床上浸水・停電・孤立・避難困難・救助要請集中	床上浸水がさらに拡大し、複数の家屋で孤立・停電が発生。高齢者世帯が主に影響を受け、救助要請が同時多発。道路は胸程度まで冠水し、徒歩・ボート以外での救助は困難。夜間照明・通信にも支障が出始めている。	要配慮者名簿の再確認・個別支援、徒歩・ボート救助班の再編成・迅速派遣、停電エリアの安全確認、避難所の受け入れ体制強化、現場指揮系統の再確認、警察・消防・行政の連携強化、照明・通信手段の確保	平成25年台風18号時、同地区で床上浸水・孤立・停電・救助要請が同時発生し、救助活動が混乱した事例あり	['床上浸水拡大による住民の孤立', '停電による情報収集・安否確認の遅れ', '要配慮者の救助遅延', '通信途絶による現場指揮の混乱']	['電気設備・ガス設備の浸水による火災・感電リスク', '交通遮断による救助活動の遅延', '下水道逆流による衛生被害', '避難所の受け入れ混乱']
		1-5	0	発災21分後	停電・床上浸水・孤立世帯がさらに増加、夜間照明・通信が一部断絶、住民の体調不良・パニック発生	住民	花園町4丁目の南側住宅街に住む住民から『自宅が床上まで浸水し、停電で真っ暗なため不安で動けない。家族の1人が気分が悪いと訴えている。2階に避難しているが助けてほしい』との通報。	現場は住宅密集地で、南北道路沿いに被害が集中。停電・浸水拡大のため、住民の携帯電話も一部圏外。消防・警察は徒歩・ボートで救助活動中。	淀川に隣接した標高の低い住宅密集地。南側が窪地で短時間で浸水・停電・孤立・健康被害が拡大しやすい。排水能力を超過し、古い住宅が多く被害が深刻化しやすい。	浸水・停電・孤立・体調不良者同時発生時の多機関連携による情報整理・現場指揮・優先順位付けを訓練。住民のパニック・健康被害にも対応できる判断力と連携力の向上を狙う。	夜間・停電下での孤立世帯対応、体調不良者への救急搬送判断、現場情報の整理・優先順位付け、住民の不安解消・安全確保、関係機関との連携強化。	孤立・体調不良者世帯のリストアップと優先順位付け、徒歩・ボートによる救助・救急班の派遣、停電エリアの安全確認、避難所受け入れ体制の再強化、住民への避難・健康被害防止の広報、警察・消防・救急・福祉の連携強化。	停電・通信途絶で現場情報収集が困難、夜間救助による安全確保、体調不良者の迅速な搬送・医療対応、住民のパニック拡大、複数機関間の情報共有遅延、避難所の混乱	道路で胸程度の冠水、住宅街の多数で床上30〜50cm浸水、広範囲で停電・通信障害発生	床上浸水・停電・孤立・体調不良・避難困難・救助要請集中	床上浸水・停電・通信障害が広範囲で発生し、孤立・体調不良者が複数世帯で発生。夜間で現場は暗く、住民の不安・パニックが拡大。救助活動は徒歩・ボート中心で、追加の救急対応も必要な状態。	要配慮者名簿の再確認・個別支援、徒歩・ボート救助・救急班の迅速派遣、停電エリアの安全確認・照明確保、避難所の受け入れ体制強化、現場指揮系統の再確認、警察・消防・救急・福祉の連携強化、住民への広報・健康被害防止策の徹底	平成25年台風18号時、同地区で床上浸水・孤立・停電・救助要請・体調不良者発生が同時多発し、救助活動が混乱した事例あり	['床上浸水拡大による住民の孤立', '停電・通信障害による情報収集・安否確認の遅れ', '体調不良者の救助・搬送遅延', '住民のパニック拡大']	['電気設備・ガス設備の浸水による火災・感電リスク', '交通遮断による救助活動の遅延', '下水道逆流による衛生被害', '避難所の受け入れ混乱']
		1-6	0	発災26分後	救助活動中に一部の住宅でガス臭が発生、ガス漏洩の疑いあり。現場では追加の救助要請と避難誘導が続く。	消防	花園町4丁目南側の床上浸水エリアで救助活動中の消防隊より、『住宅の玄関付近でガス臭を確認。周囲に避難を呼びかけているが、孤立世帯もあり、迅速な対応が必要』との報告。	ガス会社には緊急連絡済み。現場は停電・通信障害も継続中。住民の一部は2階に避難中で、追加の救助要請が複数入っている。	淀川に隣接した低地の住宅密集地。南側の窪地に水が集中し、短時間で浸水・停電・孤立・ガス漏洩等の二次災害が重なりやすい。古い住宅が多く、インフラ被害が深刻化しやすい。	浸水・停電・孤立拡大下でのガス漏洩等の二次災害対応、現場指揮・多機関連携・住民安全確保の訓練。複数のリスクが重なる場面での優先順位付けと実務的判断力の向上を狙う。	ガス漏洩疑い時の現場即応（避難指示・ガス会社連絡）、孤立・救助要請世帯への迅速対応、停電・通信障害下での現場指揮・情報整理、関係機関との連携強化。	ガス会社への現場急行要請、現場周辺の住民への避難指示、孤立世帯のリストアップと優先救助、現場状況の本部・関係機関への即時共有、避難所での受け入れ準備・健康管理体制強化、住民への広報・安全指導。	ガス漏洩による爆発・火災リスク、停電・通信障害での情報伝達の遅れ、夜間救助の安全確保、孤立世帯への接近困難、複数リスク同時対応による現場混乱、住民のパニック拡大	道路は胸程度の冠水継続、住宅街の多くで床上30〜50cm浸水、停電・通信障害、ガス漏洩疑い発生	床上浸水・停電・孤立・ガス漏洩・避難困難・救助要請集中	床上浸水・停電・通信障害が広範囲で続く中、救助活動現場でガス臭が発生し、ガス漏洩の疑い。孤立世帯・体調不良者・救助要請が同時多発。夜間で現場は暗く、住民の不安・パニックが拡大。ガス爆発等の二次災害リスクが高まっている。	ガス会社と連携した迅速な現場対応、住民への避難・安全指示、要配慮者名簿の活用と個別支援、徒歩・ボート救助・救急班の迅速派遣、照明・通信手段の確保、現場指揮系統の再確認、関係機関連携の徹底、住民への広報・健康被害防止策の徹底	平成25年台風18号時、同地区で床上浸水・孤立・停電・ガス漏洩・救助要請が同時発生し、現場混乱・住民パニック・爆発事故寸前の事例あり	['床上浸水拡大による住民の孤立', '停電・通信障害による情報収集・安否確認の遅れ', 'ガス漏洩による爆発・火災リスク', '体調不良者の救助・搬送遅延', '住民のパニック拡大']	['電気・ガス設備の浸水による火災・感電・爆発リスク', '交通遮断による救助活動の遅延', '下水道逆流による衛生被害', '避難所の受け入れ混乱']
		1-7	0	発災33分後	床上浸水・停電・孤立世帯が継続する中、現場で救助活動を行っていた消防隊より、浸水家屋の一部で感電事故が発生したとの報告が入る。	消防	花園町4丁目南側の浸水エリアで救助活動を行っていた消防隊から『床上浸水中の住宅で、住民が感電した模様。意識はあるが動けない状態。現場は停電継続中だが、一部通電していた可能性あり』との連絡。	現場は床上40cm以上の浸水が継続中。感電事故が発生した住宅は2階建てで、他にも孤立世帯が複数あり、救助活動が続いている。電力会社には緊急停止要請済み。	淀川に隣接した低地の住宅密集地。南側の窪地に水が集中し、短時間で浸水・停電・孤立・二次災害（感電等）が重なりやすい。古い住宅が多く、インフラ被害が深刻化しやすい。	浸水・停電・孤立下での感電事故発生時の現場即応・安全確保・多機関連携の訓練。複数リスク同時発生時の優先順位付けと現場指揮の強化を狙う。	感電事故発生時の現場即応（救急要請・現場安全確保・電源遮断）、孤立世帯への優先対応、停電・通信障害下の情報整理・伝達、関係機関（消防・救急・電力会社）との連携強化。	救急隊への現場急行要請、感電現場の安全確保と立入規制、電力会社への再確認・停電範囲の拡大要請、孤立・要配慮者世帯のリストアップと優先救助、現場状況の本部・関係機関への即時共有、住民への注意喚起（感電・火災防止）。	感電事故の再発リスク、停電・通信障害での情報伝達遅延、夜間救助の安全確保、孤立世帯への接近困難、複数リスク同時対応による現場混乱、住民のパニック拡大	道路は胸程度の冠水継続、住宅街の多くで床上40〜60cm浸水、停電・通信障害・感電事故発生	床上浸水・停電・孤立・感電事故・避難困難・救助要請集中	床上浸水・停電・通信障害が広範囲で続く中、救助活動現場で感電事故が発生。孤立世帯・体調不良者・救助要請が同時多発。夜間で現場は暗く、住民の不安・パニックが拡大。感電・火災等の二次災害リスクが高まっている。	電力会社と連携した迅速な停電措置、住民への感電・火災注意喚起、要配慮者名簿の活用と個別支援、徒歩・ボート救助・救急班の迅速派遣、照明・通信手段の確保、現場指揮系統の再確認、関係機関連携の徹底、住民への広報・健康被害防止策の徹底	平成25年台風18号時、同地区で床上浸水・孤立・停電・感電事故・救助要請が同時発生し、現場混乱・住民パニック・二次災害が問題となった事例あり	['床上浸水拡大による住民の孤立', '停電・通信障害による情報収集・安否確認の遅れ', '感電事故による人身被害', '体調不良者の救助・搬送遅延', '住民のパニック拡大']	['電気・ガス設備の浸水による火災・感電・爆発リスク', '交通遮断による救助活動の遅延', '下水道逆流による衛生被害', '避難所の受け入れ混乱']
		1-8	0	発災38分後	床上浸水・停電・孤立・感電事故発生後も、救助活動が続く中、現場で孤立世帯の中に高齢者が複数名いることが判明し、追加の救助要請が入る。	警察	警察官が現場確認を継続したところ、床上浸水・停電が続く南側住宅街の複数世帯で高齢者のみの孤立が判明。『2階で待機しているが、水位がさらに上昇しており、体調不良を訴えている住民もいる』との追加要請が入った。	現場は依然として道路が胸程度まで冠水、床上50〜60cmの浸水が継続。停電・通信障害も続き、住民の携帯電話は一部圏外。消防・救急・電力会社・ガス会社と連携中。	淀川に隣接した低地の住宅密集地。南側が窪地で短時間に水が集中しやすく、排水能力を超過した状態が続く。古い住宅が多く、インフラ被害・二次災害リスクが高い。	床上浸水・停電・孤立・感電事故発生後の追加救助要請に対し、優先順位付け・多機関連携・現場指揮の再強化を訓練。要配慮者の迅速な抽出・救助判断、情報整理・伝達の徹底を狙う。	孤立世帯・要配慮者への優先救助、感電・ガス漏洩・停電等複合リスク下での現場指揮体制再確認、関係機関連携の一層の強化、住民の安全確保と現場混乱の抑制。	要配慮者（高齢者等）リストの再確認と優先順位付け、徒歩・ボート・救急班の再編成・派遣、現場情報の整理と本部・関係機関への即時共有、住民への避難・健康被害防止の再広報、電力・ガス会社との安全確認、避難所の受け入れ体制再点検。	感電・ガス漏洩等の二次災害リスク継続、停電・通信障害による情報伝達遅延、夜間救助の安全確保、孤立世帯への接近困難、複数要請による現場混乱、住民パニック拡大	道路で胸程度の冠水継続、住宅街の多くで床上50〜60cm浸水、停電・通信障害・感電事故の発生が継続	床上浸水・停電・孤立・感電事故・要配慮者救助要請増加・避難困難	床上浸水・停電・通信障害が広範囲で続く中、複数世帯で高齢者のみが孤立。体調不良訴えもあり、追加の救助要請が入っている。感電やガス漏洩等の二次災害リスクも継続。救助活動は徒歩・ボート中心で、現場混乱が拡大。	要配慮者名簿の再確認・優先救助、徒歩・ボート救助・救急班の迅速派遣、電力・ガス会社と連携した安全確認、現場指揮系統の再確認、関係機関連携の徹底、住民への広報・健康被害防止策の徹底、避難所体制の強化	平成25年台風18号時、同地区で床上浸水・孤立・停電・感電事故・救助要請が同時発生し、現場混乱・住民パニック・二次災害が問題となった事例あり	['床上浸水拡大による住民の孤立', '停電・通信障害による情報収集・安否確認の遅れ', '感電・ガス漏洩等の二次災害による人身被害', '体調不良者の救助・搬送遅延', '住民のパニック拡大']	['電気・ガス設備の浸水による火災・感電・爆発リスク', '交通遮断による救助活動の遅延', '下水道逆流による衛生被害', '避難所の受け入れ混乱']
		1-9	0	発災41分後	床上浸水・停電・孤立・感電事故・高齢者体調不良が継続する中、現場で救助活動を行っていた消防隊より、浸水家屋の一部でガス漏洩の疑いが再度強くなり、避難指示を拡大する必要が生じたとの報告が入る。	消防	花園町4丁目南側の浸水エリアで救助活動中の消防隊から『床上浸水中の住宅で再度強いガス臭が確認され、現場周辺住民に速やかな避難を呼びかけている。孤立世帯にも避難拡大が必要』との連絡。	ガス会社は現場へ急行中。現場は胸程度の冠水・床上50〜60cm浸水が継続、停電・通信障害も継続中。孤立世帯・体調不良者・高齢者救助要請も同時進行。	淀川に隣接した低地の住宅密集地。南側の窪地に水が集中しやすく、短時間で浸水・停電・孤立・ガス漏洩等の複合災害が発生しやすい。古い住宅が多く、インフラ被害が深刻化しやすい。	複合リスク（浸水・停電・感電・ガス漏洩・孤立・体調不良）が重なる現場での、優先順位付け・多機関連携・現場指揮体制の再強化を訓練。避難指示の判断と伝達、住民安全確保の徹底を狙う。	ガス漏洩時の迅速な避難指示・現場即応、孤立・要配慮者への優先救助、複合災害リスク下での現場指揮体制再点検、関係機関連携の徹底、住民の安全確保とパニック防止。	ガス会社への現場急行要請、現場周辺の住民への避難指示徹底、孤立世帯・要配慮者のリストアップと優先救助、現場状況の本部・関係機関への即時共有、避難所での受け入れ体制強化、住民への安全指導・健康被害防止の再広報。	ガス漏洩による爆発・火災リスク、停電・通信障害での情報伝達遅延、夜間救助の安全確保、孤立世帯への接近困難、複数リスク同時対応による現場混乱、住民のパニック拡大	道路は胸程度の冠水継続、住宅街の多くで床上50〜60cm浸水、停電・通信障害・ガス漏洩疑いが継続	床上浸水・停電・孤立・感電事故・ガス漏洩・要配慮者救助要請増加・避難困難	床上浸水・停電・通信障害が広範囲で続き、複数世帯で高齢者のみが孤立。体調不良者や感電事故発生に加え、ガス漏洩疑いが再度強まり、現場では避難指示の拡大が必要に。救助活動は徒歩・ボート中心で、現場混乱が拡大している。	ガス会社・電力会社と連携した現場対応、住民への避難・安全指示、要配慮者名簿の活用と個別支援、徒歩・ボート救助・救急班の迅速派遣、照明・通信手段の確保、現場指揮系統の再確認、関係機関連携の徹底、住民への広報・健康被害防止策の徹底、避難所体制の強化	平成25年台風18号時、同地区で床上浸水・孤立・停電・感電事故・ガス漏洩・救助要請が同時発生し、現場混乱・住民パニック・二次災害が問題となった事例あり	['床上浸水拡大による住民の孤立', '停電・通信障害による情報収集・安否確認の遅れ', '感電・ガス漏洩等の二次災害による人身被害', '体調不良者の救助・搬送遅延', '住民のパニック拡大']	['電気・ガス設備の浸水による火災・感電・爆発リスク', '交通遮断による救助活動の遅延', '下水道逆流による衛生被害', '避難所の受け入れ混乱']
		1-10	0	発災48分後	床上浸水・停電・孤立・感電事故・ガス漏洩疑いが継続する中、消防・警察・ガス会社・電力会社・医療班が連携し、現場の安全確保・追加救助・住民の避難誘導を同時進行で実施。新たな孤立世帯で要配慮者（高齢者・体調不良者）が発見され、優先救助が必要となる。	消防	花園町4丁目南側の床上浸水エリアで救助活動中の消防隊から『新たに2世帯で高齢者と体調不良者が孤立しているのを確認。現場周辺はガス臭が残り、停電・通信障害が続いている。救助と同時に周囲住民の避難誘導も必要』との連絡。	ガス会社・電力会社・警察・医療班が現場に到着済み。孤立世帯は2階に避難中で、体調不良者は吐き気・頭痛を訴えている。周辺道路は胸程度の冠水が継続。避難所受け入れは満員に近いが、追加スペース確保中。	淀川に隣接した標高の低い住宅密集地。南側が窪地で水が集中しやすく、短時間で浸水・停電・孤立・感電・ガス漏洩など複合災害が発生しやすい。古い住宅が多くインフラ被害が深刻化しやすい。	複合災害リスク（浸水・停電・感電・ガス漏洩・孤立・体調不良）が継続する現場で、複数機関連携による現場指揮・救助優先順位付け・住民安全確保・避難所運用の総合的な実践訓練を行う。	複数孤立世帯・体調不良者の優先救助、現場の安全確保（感電・ガス漏洩対応）、避難誘導・避難所運用の再調整、関係機関（消防・警察・医療・ガス・電力）間の迅速な情報共有と現場調整。	孤立・体調不良者世帯のリストアップと優先順位付け、救助・医療班の迅速派遣、ガス・電力会社と連携した安全確認、避難所追加スペースの確保と受け入れ指示、住民への避難再通知・健康被害防止の再広報、現場指揮本部への即時報告。	複数リスク（感電・ガス漏洩・体調不良）同時対応による現場混乱、停電・通信障害での情報伝達遅延、避難所の過密・衛生管理遅延、夜間救助の安全確保、住民のパニック拡大、関係機関間の連携遅延	道路は胸程度の冠水継続、住宅街の多くで床上50〜60cm浸水、停電・通信障害・ガス漏洩疑いが継続	床上浸水・停電・孤立・感電事故・ガス漏洩・体調不良者発生・避難困難	床上浸水・停電・通信障害が広範囲で継続し、複数世帯で高齢者や体調不良者が孤立。感電事故・ガス漏洩疑いも続き、現場は混乱。救助・医療・避難誘導・安全確保を同時進行で実施する必要がある。避難所も受け入れ限界が近い。	ガス会社・電力会社と連携した現場安全確認、要配慮者名簿の活用と個別救助、徒歩・ボート救助・救急班の迅速派遣、避難所追加スペース確保・衛生管理強化、現場指揮系統の再確認、関係機関連携・広報の徹底	平成25年台風18号時、同地区で床上浸水・孤立・停電・感電・ガス漏洩・体調不良者・避難所混乱が同時発生し、現場混乱・住民パニック・二次災害が問題となった事例あり	['床上浸水拡大による住民の孤立', '停電・通信障害による情報収集・安否確認の遅れ', '感電・ガス漏洩等の二次災害による人身被害', '体調不良者の救助・搬送遅延', '避難所の過密・衛生悪化', '住民のパニック拡大']	['電気・ガス設備の浸水による火災・感電・爆発リスク', '交通遮断による救助活動の遅延', '下水道逆流による衛生被害', '避難所の受け入れ混乱']
		1-11	0	発災55分後	床上浸水・停電・孤立・感電・ガス漏洩疑い・体調不良者発生・避難所過密が継続し、現場では避難所からの追加受け入れ困難を受けて一時的な待機所（サテライト避難所）開設の判断が必要となる。	行政（現場本部）	現場本部より『花園町4丁目南側の床上浸水エリアで、既存避難所が満員となり、追加の受け入れが困難な状況。孤立世帯や体調不良者の一時待機場所として、近隣の公共施設をサテライト避難所として開設する判断が必要』との連絡。	既存の避難所は高齢者・体調不良者で満杯。現場は胸程度の冠水、床上60cm前後の浸水、停電・通信障害・ガス漏洩疑い・感電事故が継続。サテライト避難所候補は町内会館や学校体育館など。	淀川に隣接した標高の低い住宅密集地。南側が窪地で水が集中しやすく、短時間で複合災害（浸水・停電・感電・ガス漏洩など）が発生しやすい。古い住宅が多く、インフラ被害が深刻化しやすい。	複合災害（浸水・停電・感電・ガス漏洩・体調不良・避難困難）が長期化・拡大した場合の、現場判断による臨時避難所開設・運用・住民誘導の実践訓練を行う。	避難所過密時の臨時避難所（サテライト避難所）開設判断、現場・本部・関係機関の調整、住民・要配慮者の安全確保、避難誘導・物資搬送・衛生管理体制の迅速構築。	サテライト避難所候補の現地確認・開設指示、避難誘導班・物資搬送班の編成と派遣、現場本部・既存避難所・関係機関（消防・警察・保健・福祉・ボランティア）との連携、住民・要配慮者リストの再整理と優先搬送、衛生・健康管理体制の確立、住民への広報・安全指導。	避難所過密による受け入れ遅延、サテライト避難所開設準備の遅れ、物資・人員不足、住民の不安・混乱拡大、現場・本部間の情報伝達遅延、複数機関連携の混乱	道路は胸程度の冠水が継続、住宅街の多くで床上60cm前後の浸水、停電・通信障害・ガス漏洩疑い・感電事故が継続	床上浸水・停電・孤立・感電事故・ガス漏洩・体調不良者・避難所過密・臨時避難所開設	床上浸水・停電・通信障害・感電事故・ガス漏洩疑いが継続し、複数世帯で高齢者や体調不良者が孤立。避難所は満員となり、追加受け入れが困難なため、臨時避難所（サテライト避難所）開設と住民誘導が必要な状況。現場は複合リスク下で混乱しやすい。	サテライト避難所の迅速な開設・運用、避難誘導・物資搬送班の強化、現場本部・既存避難所・関係機関との連携、要配慮者名簿の活用と優先救助・搬送、衛生・健康管理体制の確立、現場・本部間の情報共有徹底、住民への広報・安全指導の徹底	平成25年台風18号時、同地区で床上浸水・孤立・停電・感電・ガス漏洩・体調不良者・避難所混乱が同時発生し、臨時避難所開設が必要となった事例あり	['床上浸水拡大による住民の孤立', '停電・通信障害による情報収集・安否確認の遅れ', '感電・ガス漏洩等の二次災害による人身被害', '体調不良者の救助・搬送遅延', '避難所の過密・衛生悪化', '住民のパニック拡大']	['電気・ガス設備の浸水による火災・感電・爆発リスク', '交通遮断による救助活動の遅延', '下水道逆流による衛生被害', '避難所の受け入れ混乱']
		1-12	0	発災58分後	サテライト避難所（臨時避難所）の開設が始まり、避難誘導・物資搬送・健康管理班の現場派遣が進む中、既存避難所から追加の医療支援要請が入る。	避難所職員	既存避難所の職員から『高齢者や体調不良者の受け入れが続き、応急手当や健康管理のための医療スタッフ・医薬品が不足している。サテライト避難所にも同様の支援が必要』との要請が本部に入った。	既存避難所は満杯状態で、サテライト避難所（町内会館・学校体育館等）への避難誘導が本格化。避難所間の連絡は無線と一部携帯で対応中。医療スタッフは現場班と自治体保健師が分担中。	淀川に隣接した標高の低い住宅密集地。南側が窪地で水が集中しやすく、短時間で複合災害（浸水・停電・感電・ガス漏洩など）が発生しやすい。古い住宅が多く、避難所も徒歩圏内に点在。	避難所・サテライト避難所運用下での健康被害拡大時、医療・福祉・行政の多機関連携による応急対応・物資搬送・住民健康管理の実践訓練。現場判断力・連携・資源配分の強化を狙う。	避難所過密・サテライト避難所開設時の医療支援・健康管理体制強化、現場班・本部・医療機関の連携、避難所間の物資・人員調整、住民の安全確保・健康維持、情報共有の迅速化。	医療スタッフの追加派遣・調整、医薬品・衛生資材の優先搬送、避難所間の連絡・情報共有、住民健康状態のリストアップと優先対応、避難誘導・健康相談体制の強化、関係機関（保健・福祉・医療・ボランティア）との連携・調整。	医療スタッフ・物資不足、避難所間連絡の遅延、健康被害拡大への即応困難、住民の不安・混乱拡大、複数機関連携の調整遅延、夜間・停電下での応急対応困難	道路は胸程度の冠水が継続、住宅街の多くで床上60cm前後の浸水、停電・通信障害・ガス漏洩疑い・感電事故が継続	床上浸水・停電・孤立・感電事故・ガス漏洩・体調不良者・避難所過密・臨時避難所運用・医療資源逼迫	床上浸水・停電・通信障害・感電事故・ガス漏洩疑いが継続し、複数世帯で高齢者や体調不良者が孤立。避難所は満員、サテライト避難所への避難誘導が進む中、医療スタッフ・医薬品の不足が深刻化し、健康被害拡大リスクが高まっている。	サテライト避難所の迅速な開設・運用、避難誘導・物資搬送班の強化、現場本部・既存避難所・関係機関との連携、要配慮者名簿の活用と優先救助・搬送、衛生・健康管理体制の確立、現場・本部間の情報共有徹底、住民への広報・安全指導の徹底、医療機関との連携強化	平成25年台風18号時、同地区で床上浸水・孤立・停電・感電・ガス漏洩・体調不良者・避難所混乱・医療資源不足が同時発生し、臨時避難所開設・医療応援要請が必要となった事例あり	['床上浸水拡大による住民の孤立', '停電・通信障害による情報収集・安否確認の遅れ', '感電・ガス漏洩等の二次災害による人身被害', '体調不良者の救助・搬送遅延', '避難所の過密・衛生悪化', '医療スタッフ・物資不足による健康被害拡大', '住民のパニック拡大']	['電気・ガス設備の浸水による火災・感電・爆発リスク', '交通遮断による救助活動の遅延', '下水道逆流による衛生被害', '避難所の受け入れ混乱', '感染症・生活環境悪化による体調不良者増加']
		1-13	0	発災64分後	サテライト避難所（臨時避難所）が本格稼働し、避難誘導・物資搬送・健康管理班による現場巡回が強化される中、避難所間での高齢者・体調不良者の優先搬送と医療物資の分配調整が必要となる。	現場班（避難誘導・物資搬送・保健師）	花園町4丁目の既存避難所およびサテライト避難所双方で、体調不良者や高齢者の増加に伴い、応急手当・健康管理のための医療物資（解熱剤・消毒液・簡易ベッド等）が不足し始めているとの現場報告。避難所間での物資再配分と、体調不良者の優先的な搬送・健康チェックが求められている。	避難所間の連絡は無線と携帯を併用。既存避難所・サテライト避難所ともに収容数が限界に近く、今後も追加搬送希望者が見込まれる。保健師は健康相談・感染症予防指導も担当。	淀川に隣接した標高の低い住宅密集地。南側が窪地で水が集中しやすく、短時間で複合災害（浸水・停電・感電・ガス漏洩など）が発生しやすい。古い住宅が多く、避難所も徒歩圏内に点在。	複数避難所運用下での医療・物資・人員配分の現場調整、多機関連携による健康被害抑制・優先順位判断・情報共有の実践力向上を狙う。	避難所間の物資・人員調整、体調不良者・高齢者の優先搬送・健康管理、現場班・本部・医療機関との情報共有・連携強化、住民安全確保・衛生維持。	医療物資・衛生資材の優先搬送、体調不良者・高齢者リストの再整理と優先搬送、保健師・医療スタッフの現場展開、避難所間・本部との情報共有、住民健康状態の把握・健康相談体制強化、関係機関（保健・福祉・医療・ボランティア）との連携調整。	医療物資・スタッフ不足、避難所間搬送・調整の遅延、健康被害拡大への即応困難、住民不安・混乱拡大、夜間・停電下での応急対応困難、複数機関連携の調整遅延	道路は胸程度の冠水が継続、住宅街の多くで床上60cm前後の浸水、停電・通信障害・ガス漏洩疑い・感電事故が継続	床上浸水・停電・孤立・感電事故・ガス漏洩・体調不良者・避難所過密・臨時避難所運用・医療資源逼迫	床上浸水・停電・通信障害・感電事故・ガス漏洩疑いが継続し、複数世帯で高齢者や体調不良者が孤立。避難所・サテライト避難所ともに満員に近く、医療スタッフ・医薬品の不足が深刻化し、健康被害拡大リスクが高まっている。	サテライト避難所の迅速な運用、避難誘導・物資搬送・健康管理班の現場展開強化、要配慮者名簿の活用と優先救助・搬送、衛生・健康管理体制の確立、現場・本部・避難所間の情報共有徹底、住民への広報・安全指導の徹底、医療機関との連携強化	平成25年台風18号時、同地区で床上浸水・孤立・停電・感電・ガス漏洩・体調不良者・避難所混乱・医療資源不足が同時発生し、臨時避難所開設・医療応援要請が必要となった事例あり	['床上浸水拡大による住民の孤立', '停電・通信障害による情報収集・安否確認の遅れ', '感電・ガス漏洩等の二次災害による人身被害', '体調不良者の救助・搬送遅延', '避難所の過密・衛生悪化', '医療スタッフ・物資不足による健康被害拡大', '住民のパニック拡大']	['電気・ガス設備の浸水による火災・感電・爆発リスク', '交通遮断による救助活動の遅延', '下水道逆流による衛生被害', '避難所の受け入れ混乱', '感染症・生活環境悪化による体調不良者増加']
		1-14	0	発災67分後	避難所およびサテライト避難所での体調不良者・高齢者の増加により、医療スタッフ・物資の追加手配と避難所間の搬送調整が必要な状況となる。	本部（医療調整班）	避難所・サテライト避難所双方から『高齢者・体調不良者の増加で応急手当・健康管理のための医療スタッフ・医薬品が不足。搬送や物資の追加手配が急務』との連絡が相次いでいる。	避難所間の連絡は無線・携帯を併用。搬送希望者のリストが増加し、保健師・医療スタッフの現場展開が追いついていない。追加物資の搬送車両も不足しがち。	淀川に隣接した標高の低い住宅密集地。南側が窪地で水が集中しやすく、短時間で複合災害（浸水・停電・感電・ガス漏洩など）が発生しやすい。古い住宅が多く、避難所も徒歩圏内に点在。	避難所・サテライト避難所運用下での医療資源逼迫時、多機関連携による応急対応・物資搬送・健康管理の実践訓練。現場調整力・優先順位判断・情報共有の強化を狙う。	避難所間の医療物資・スタッフ調整、体調不良者・高齢者の優先搬送、現場班・本部・医療機関の情報共有・調整、住民健康管理と衛生維持。	医療スタッフの追加派遣・調整、医薬品・衛生資材の優先搬送、避難所間の連絡・情報共有、体調不良者・高齢者リストの再整理と優先搬送、健康相談体制の強化、関係機関（保健・福祉・医療・ボランティア）との連携強化。	医療スタッフ・物資不足、搬送・調整の遅延、健康被害拡大への即応困難、住民不安・混乱拡大、夜間・停電下での応急対応困難、複数機関連携の調整遅延	道路は胸程度の冠水が継続、住宅街の多くで床上60cm前後の浸水、停電・通信障害・ガス漏洩疑い・感電事故が継続	床上浸水・停電・孤立・感電事故・ガス漏洩・体調不良者・避難所過密・臨時避難所運用・医療資源逼迫	床上浸水・停電・通信障害・感電事故・ガス漏洩疑いが継続し、複数世帯で高齢者や体調不良者が孤立。避難所・サテライト避難所ともに満員に近く、医療スタッフ・医薬品の不足が深刻化し、健康被害拡大リスクが高まっている。	サテライト避難所の迅速な運用、避難誘導・物資搬送・健康管理班の現場展開強化、要配慮者名簿の活用と優先救助・搬送、衛生・健康管理体制の確立、現場・本部・避難所間の情報共有徹底、住民への広報・安全指導の徹底、医療機関との連携強化	平成25年台風18号時、同地区で床上浸水・孤立・停電・感電・ガス漏洩・体調不良者・避難所混乱・医療資源不足が同時発生し、臨時避難所開設・医療応援要請が必要となった事例あり	['床上浸水拡大による住民の孤立', '停電・通信障害による情報収集・安否確認の遅れ', '感電・ガス漏洩等の二次災害による人身被害', '体調不良者の救助・搬送遅延', '避難所の過密・衛生悪化', '医療スタッフ・物資不足による健康被害拡大', '住民のパニック拡大']	['電気・ガス設備の浸水による火災・感電・爆発リスク', '交通遮断による救助活動の遅延', '下水道逆流による衛生被害', '避難所の受け入れ混乱', '感染症・生活環境悪化による体調不良者増加']
		1-15	0	発災72分後	避難所・サテライト避難所双方での体調不良者・高齢者の増加により、医療スタッフ・医薬品・搬送車両の追加手配と避難所間の搬送調整、健康相談体制の現場強化が急務となる。	本部（医療調整班）	『避難所・サテライト避難所で体調不良者や高齢者がさらに増加し、応急手当や健康管理のための医療スタッフ・医薬品が不足している。搬送希望者も増加しており、追加の人員や物資搬送車両の派遣が至急必要』との連絡が本部に相次いで入っている。	搬送希望者リストがさらに増加、保健師・医療スタッフの現場展開が追いついていない。追加物資の搬送車両も不足、夜間対応のため照明・発電機も不足気味。	淀川に隣接した標高の低い住宅密集地。南側が窪地で水が集中しやすく、短時間で複合災害（浸水・停電・感電・ガス漏洩など）が発生しやすい。古い住宅が多く、避難所も徒歩圏内に点在。	医療資源逼迫時の多機関連携による応急対応・物資搬送・健康管理の現場調整訓練。優先順位判断・現場調整力・情報共有力の強化を狙う。	避難所間の医療物資・スタッフ調整、体調不良者・高齢者の優先搬送、現場班・本部・医療機関の情報共有・調整、住民健康管理と衛生維持。※現場の搬送・物資調整と夜間対応の実践がポイント	医療スタッフの追加派遣・調整、医薬品・衛生資材の優先搬送、夜間対応用照明・発電機の迅速手配、避難所間の連絡・情報共有、体調不良者・高齢者リストの再整理と優先搬送、健康相談体制の強化、関係機関（保健・福祉・医療・ボランティア）との連携強化。	医療スタッフ・物資不足、搬送・調整の遅延、健康被害拡大への即応困難、住民不安・混乱拡大、夜間・停電下での応急対応困難、複数機関連携の調整遅延	道路は胸程度の冠水が継続、住宅街の多くで床上60cm前後の浸水、停電・通信障害・ガス漏洩疑い・感電事故が継続	床上浸水・停電・孤立・感電事故・ガス漏洩・体調不良者・避難所過密・臨時避難所運用・医療資源逼迫	床上浸水・停電・通信障害・感電事故・ガス漏洩疑いが継続し、複数世帯で高齢者や体調不良者が孤立。避難所・サテライト避難所ともに満員に近く、医療スタッフ・医薬品の不足が深刻化し、健康被害拡大リスクが高まっている。夜間対応・照明不足も課題。	サテライト避難所の迅速な運用、避難誘導・物資搬送・健康管理班の現場展開強化、要配慮者名簿の活用と優先救助・搬送、衛生・健康管理体制の確立、現場・本部・避難所間の情報共有徹底、住民への広報・安全指導の徹底、医療機関との連携強化、夜間対応マニュアルの徹底	平成25年台風18号時、同地区で床上浸水・孤立・停電・感電・ガス漏洩・体調不良者・避難所混乱・医療資源不足が同時発生し、臨時避難所開設・医療応援要請が必要となった事例あり	['床上浸水拡大による住民の孤立', '停電・通信障害による情報収集・安否確認の遅れ', '感電・ガス漏洩等の二次災害による人身被害', '体調不良者の救助・搬送遅延', '避難所の過密・衛生悪化', '医療スタッフ・物資不足による健康被害拡大', '住民のパニック拡大']	['電気・ガス設備の浸水による火災・感電・爆発リスク', '交通遮断による救助活動の遅延', '下水道逆流による衛生被害', '避難所の受け入れ混乱', '感染症・生活環境悪化による体調不良者増加']
		1-16	0	発災80分後	避難所・サテライト避難所での体調不良者・高齢者の増加が継続し、追加の医療スタッフ・医薬品・搬送車両の手配、夜間対応体制の再点検、現場班・本部・関係機関間の優先順位付けと調整が求められる。	本部（医療・現場調整班）	『避難所・サテライト避難所で体調不良者や高齢者の増加が続き、応急手当や健康管理のための医療スタッフ・医薬品・搬送車両が引き続き不足している。夜間対応のため照明・発電機の追加手配も必要。現場班・本部・関係機関で優先順位を再確認し、搬送・応急対応の調整を強化する必要あり』との報告。	搬送希望者リストは増加傾向。夜間対応のための照明・発電機は一部現場に到着済みだが、全避難所への配備は未了。医療スタッフ・保健師の現場展開も継続的に調整中。	淀川に隣接した標高の低い住宅密集地。南側が窪地で水が集中しやすく、短時間で複合災害（浸水・停電・感電・ガス漏洩など）が発生しやすい。古い住宅が多く、避難所も徒歩圏内に点在。	医療資源逼迫・夜間対応下での多機関連携による優先順位判断・現場調整・情報共有の徹底訓練。現場主導による応急対応力・調整力の強化を狙う。	医療物資・スタッフ・搬送車両の追加手配と現場調整、夜間対応体制の再点検、優先順位判断・情報共有の徹底、住民健康管理と安全維持。※現場リーダーによる判断・調整力がポイント	医療スタッフ・医薬品・搬送車両・照明機器・発電機の追加手配、体調不良者・高齢者リストの再整理と優先搬送、現場班と本部・関係機関（保健・福祉・医療・ボランティア）との連携強化、夜間の安全確保・健康相談体制の強化、住民への健康・安全指導の再徹底。	医療スタッフ・物資・搬送車両の不足、夜間・停電下での応急対応困難、優先順位判断の混乱、住民不安・混乱拡大、複数機関連携の調整遅延、体調急変や事故への即応困難	道路は胸程度の冠水が継続、住宅街の多くで床上60cm前後の浸水、停電・通信障害・ガス漏洩疑い・感電事故が継続	床上浸水・停電・孤立・感電事故・ガス漏洩・体調不良者・避難所過密・臨時避難所運用・医療資源逼迫	床上浸水・停電・通信障害・感電事故・ガス漏洩疑いが継続。複数世帯で高齢者や体調不良者が孤立。避難所・サテライト避難所ともに満員に近く、医療スタッフ・医薬品・搬送車両の不足が深刻化。夜間対応・照明不足も課題で、現場班・本部・関係機関間の調整が逼迫している。	サテライト避難所の迅速な運用、避難誘導・物資搬送・健康管理班の現場展開強化、要配慮者名簿の活用と優先救助・搬送、衛生・健康管理体制の確立、現場・本部・避難所間の情報共有徹底、住民への広報・安全指導の徹底、医療機関との連携強化、夜間対応マニュアルの徹底	平成25年台風18号時、同地区で床上浸水・孤立・停電・感電・ガス漏洩・体調不良者・避難所混乱・医療資源不足が同時発生し、臨時避難所開設・医療応援要請が必要となった事例あり	['床上浸水拡大による住民の孤立', '停電・通信障害による情報収集・安否確認の遅れ', '感電・ガス漏洩等の二次災害による人身被害', '体調不良者の救助・搬送遅延', '避難所の過密・衛生悪化', '医療スタッフ・物資不足による健康被害拡大', '住民のパニック拡大']	['電気・ガス設備の浸水による火災・感電・爆発リスク', '交通遮断による救助活動の遅延', '下水道逆流による衛生被害', '避難所の受け入れ混乱', '感染症・生活環境悪化による体調不良者増加']
		1-17	0	発災85分後	避難所・サテライト避難所での体調不良者・高齢者の増加が継続し、夜間対応における現場と本部・関係機関間の優先順位判断、追加の医療スタッフ・医薬品・搬送車両・照明機器の手配、健康相談体制の現場強化が引き続き求められる。	本部（医療・現場調整班）	『避難所・サテライト避難所双方で体調不良者や高齢者の増加が続き、応急手当や健康管理のための医療スタッフ・医薬品・搬送車両・照明機器が不足している。夜間対応体制の再点検と、優先順位を現場班・本部・関係機関で共有し、追加手配・調整を継続する必要あり』との報告。	夜間対応のための照明・発電機は一部現場に到着済みだが、全避難所への配備は未了。医療スタッフ・保健師の現場展開も継続的に調整中。搬送希望者リストは増加傾向。	淀川に隣接した標高の低い住宅密集地。南側が窪地で水が集中しやすく、短時間で複合災害（浸水・停電・感電・ガス漏洩など）が発生しやすい。古い住宅が多く、避難所も徒歩圏内に点在。	医療資源逼迫・夜間対応下での現場主導による優先順位判断・調整・情報共有の徹底訓練。現場と本部・関係機関の連携強化、健康被害拡大防止、住民の安全維持を狙う。	医療物資・スタッフ・搬送車両・照明機器の追加手配と現場調整、夜間対応体制の再点検、優先順位判断・情報共有の徹底、住民健康管理と安全維持。現場リーダーによる判断・調整力がポイント。	医療スタッフ・医薬品・搬送車両・照明機器・発電機の追加手配、体調不良者・高齢者リストの再整理と優先搬送、現場班と本部・関係機関（保健・福祉・医療・ボランティア）との連携強化、夜間の安全確保・健康相談体制の強化、住民への健康・安全指導の再徹底。	医療スタッフ・物資・搬送車両の不足、夜間・停電下での応急対応困難、優先順位判断の混乱、住民不安・混乱拡大、複数機関連携の調整遅延、体調急変や事故への即応困難	道路は胸程度の冠水が継続、住宅街の多くで床上60cm前後の浸水、停電・通信障害・ガス漏洩疑い・感電事故が継続	床上浸水・停電・孤立・感電事故・ガス漏洩・体調不良者・避難所過密・臨時避難所運用・医療資源逼迫	床上浸水・停電・通信障害・感電事故・ガス漏洩疑いが継続。複数世帯で高齢者や体調不良者が孤立。避難所・サテライト避難所ともに満員に近く、医療スタッフ・医薬品・搬送車両の不足が深刻化。夜間対応・照明不足も課題で、現場班・本部・関係機関間の調整が逼迫している。	サテライト避難所の迅速な運用、避難誘導・物資搬送・健康管理班の現場展開強化、要配慮者名簿の活用と優先救助・搬送、衛生・健康管理体制の確立、現場・本部・避難所間の情報共有徹底、住民への広報・安全指導の徹底、医療機関との連携強化、夜間対応マニュアルの徹底	平成25年台風18号時、同地区で床上浸水・孤立・停電・感電・ガス漏洩・体調不良者・避難所混乱・医療資源不足が同時発生し、臨時避難所開設・医療応援要請が必要となった事例あり	['床上浸水拡大による住民の孤立', '停電・通信障害による情報収集・安否確認の遅れ', '感電・ガス漏洩等の二次災害による人身被害', '体調不良者の救助・搬送遅延', '避難所の過密・衛生悪化', '医療スタッフ・物資不足による健康被害拡大', '住民のパニック拡大']	['電気・ガス設備の浸水による火災・感電・爆発リスク', '交通遮断による救助活動の遅延', '下水道逆流による衛生被害', '避難所の受け入れ混乱', '感染症・生活環境悪化による体調不良者増加']
		1-18	0	発災89分後	避難所・サテライト避難所での体調不良者・高齢者の増加が継続し、医療スタッフ・医薬品・搬送車両・照明機器の手配状況や応急対応の優先順位確認のため、現場班・本部・関係機関による夜間緊急ミーティングが開催される。	本部（現場調整班）	『避難所・サテライト避難所で体調不良者や高齢者の搬送希望がさらに増加している。夜間対応のための照明・発電機・医療スタッフ・搬送車両の配備状況を現場班から至急報告し、応急対応の優先順位を再確認するため、現場班・本部・関係機関の夜間緊急ミーティングを開催する』との連絡が本部から現場班に入った。	照明・発電機は一部現場に到着済みだが、全避難所への配備は未了。医療スタッフ・保健師の現場展開も調整中。搬送希望者リストは増加傾向。現場と本部・関係機関の連携が重要となっている。	淀川に隣接した標高の低い住宅密集地。南側が窪地で水が集中しやすく、短時間で複合災害（浸水・停電・感電・ガス漏洩など）が発生しやすい。古い住宅が多く、避難所も徒歩圏内に点在。	医療資源逼迫・夜間対応下での現場と本部・関係機関の優先順位判断・情報共有・応急対応体制強化を訓練する。	現場リーダー・本部・関係機関による情報共有と優先順位判断、医療スタッフ・照明機器・搬送車両の追加手配状況の把握、夜間の応急対応体制の再構築。	現場班から最新の搬送希望者・体調不良者リストと資機材配備状況を本部へ即時報告、緊急会議で優先順位を協議し応急対応を再指示、医療・照明・搬送資機材の追加手配、夜間巡回班の再編成、住民への健康・安全指導の徹底。	医療スタッフ・物資・搬送車両・照明機器の不足、夜間・停電下での応急対応困難、優先順位判断の混乱、現場と本部・関係機関間の情報伝達遅延、住民不安・混乱拡大、体調急変や事故への即応困難	道路は胸程度の冠水が継続、住宅街の多くで床上60cm前後の浸水、停電・通信障害・ガス漏洩疑い・感電事故が継続	床上浸水・停電・孤立・感電事故・ガス漏洩・体調不良者・避難所過密・臨時避難所運用・医療資源逼迫	床上浸水・停電・通信障害・感電事故・ガス漏洩疑いが継続し、複数世帯で高齢者や体調不良者が孤立。避難所・サテライト避難所ともに満員に近く、医療スタッフ・医薬品・搬送車両の不足が深刻化。夜間対応・照明不足も課題となり、現場班・本部・関係機関間の調整が逼迫している。	サテライト避難所の迅速な運用、避難誘導・物資搬送・健康管理班の現場展開強化、要配慮者名簿の活用と優先救助・搬送、衛生・健康管理体制の確立、現場・本部・避難所間の情報共有徹底、住民への広報・安全指導の徹底、医療機関との連携強化、夜間対応マニュアルの徹底	平成25年台風18号時、同地区で床上浸水・孤立・停電・感電・ガス漏洩・体調不良者・避難所混乱・医療資源不足が同時発生し、臨時避難所開設・医療応援要請が必要となった事例あり	['床上浸水拡大による住民の孤立', '停電・通信障害による情報収集・安否確認の遅れ', '感電・ガス漏洩等の二次災害による人身被害', '体調不良者の救助・搬送遅延', '避難所の過密・衛生悪化', '医療スタッフ・物資不足による健康被害拡大', '住民のパニック拡大']	['電気・ガス設備の浸水による火災・感電・爆発リスク', '交通遮断による救助活動の遅延', '下水道逆流による衛生被害', '避難所の受け入れ混乱', '感染症・生活環境悪化による体調不良者増加']
		1-19	0	発災92分後	夜間対応が続く中、避難所・サテライト避難所の医療スタッフ・保健師・現場班による体調不良者・高齢者の夜間巡回・健康観察、搬送希望者の優先順位付け、照明・発電機等の資機材配備状況の再点検を実施する。	現場班（避難誘導・医療・保健師）	『避難所・サテライト避難所で体調不良者や高齢者の健康観察と夜間巡回を継続中。新たな急変者は現時点で発生していないが、搬送希望者リストが増加傾向。照明・発電機も一部現場でバッテリー残量が低下し始めており、追加手配が必要』との報告。	夜間で気温が低下傾向。健康相談・応急手当のニーズが高く、医療スタッフ・保健師の現場展開が継続中。搬送希望者の優先順位付けは本部と連携して実施。	淀川に隣接した標高の低い住宅密集地。南側が窪地で水が集中しやすく、短時間で複合災害（浸水・停電・感電・ガス漏洩など）が発生しやすい。古い住宅が多く、避難所も徒歩圏内に点在。	夜間・医療資源逼迫下での現場主導による健康観察・搬送調整・資機材管理体制の徹底訓練。住民の体調急変・安全確保、現場と本部・関係機関の連携強化を狙う。	夜間健康観察・巡回体制の維持、搬送希望者の優先順位付け、照明・発電機等の資機材管理・追加手配、現場と本部・関係機関の迅速な情報共有。※現場リーダーの判断・調整力がポイント	現場班による定時の健康観察・夜間巡回、搬送希望者リストの本部共有と優先順位付け、照明・発電機のバッテリー点検・追加手配、急変時の応急対応準備、住民への健康・安全指導、現場と本部・関係機関の情報共有体制強化。	医療スタッフ・資機材の不足、夜間・停電下での健康観察・応急対応の困難、搬送希望者の増加による調整遅延、現場と本部・関係機関間の情報伝達遅延、住民不安・混乱拡大、体調急変や事故への即応困難	道路は胸程度の冠水が継続、住宅街の多くで床上60cm前後の浸水、停電・通信障害・ガス漏洩疑い・感電事故が継続	床上浸水・停電・孤立・感電事故・ガス漏洩・体調不良者・避難所過密・臨時避難所運用・医療資源逼迫	床上浸水・停電・通信障害・感電事故・ガス漏洩疑いが継続。複数世帯で高齢者や体調不良者が孤立。避難所・サテライト避難所ともに満員に近く、医療スタッフ・医薬品・搬送車両・照明機器の不足が深刻化。夜間対応・健康観察・資機材管理が重要課題。	サテライト避難所の迅速な運用、夜間巡回・健康観察体制の強化、医療スタッフ・資機材（照明・発電機等）の追加手配、現場・本部・避難所間の情報共有徹底、要配慮者名簿の活用と優先救助・搬送、住民への健康・安全指導の徹底、医療機関との連携強化、夜間対応マニュアルの徹底	平成25年台風18号時、同地区で床上浸水・孤立・停電・感電・ガス漏洩・体調不良者・避難所混乱・医療資源不足が同時発生し、臨時避難所開設・医療応援要請が必要となった事例あり	['床上浸水拡大による住民の孤立', '停電・通信障害による情報収集・安否確認の遅れ', '感電・ガス漏洩等の二次災害による人身被害', '体調不良者の救助・搬送遅延', '避難所の過密・衛生悪化', '医療スタッフ・物資不足による健康被害拡大', '住民のパニック拡大']	['電気・ガス設備の浸水による火災・感電・爆発リスク', '交通遮断による救助活動の遅延', '下水道逆流による衛生被害', '避難所の受け入れ混乱', '感染症・生活環境悪化による体調不良者増加']
		1-20	0	発災96分後	夜間対応が続く中、避難所・サテライト避難所で体調不良者・高齢者への健康観察・夜間巡回・応急手当が継続されている。搬送希望者リストがさらに増加し、照明・発電機のバッテリー残量低下が一部現場で深刻化。追加資機材の手配と搬送優先順位の再調整が必要となっている。	本部（現場調整班）	『避難所・サテライト避難所で体調不良者や高齢者の健康観察・夜間巡回を継続中。新たな急変者は発生していないが、搬送希望者リストが増加。照明・発電機のバッテリーが限界に近い現場もあり、追加手配が至急必要』との現場班からの報告を受け、本部は関係機関と連携し対応を協議中。	夜間で気温がさらに低下。健康相談・応急手当のニーズが高まり、医療スタッフ・保健師の現場展開は継続。搬送希望者の優先順位付けは本部と現場班で再調整中。	淀川に隣接した標高の低い住宅密集地。南側が窪地で水が集中しやすく、短時間で複合災害（浸水・停電・感電・ガス漏洩など）が発生しやすい。古い住宅が多く、避難所も徒歩圏内に点在。	夜間・医療資源逼迫下での現場主導による健康観察・搬送調整・資機材管理体制の徹底訓練。住民の体調急変・安全確保、現場と本部・関係機関の連携強化を狙う。	夜間健康観察・巡回体制の維持、搬送希望者の優先順位付け、照明・発電機等の資機材管理・追加手配、現場と本部・関係機関の迅速な情報共有。現場リーダーの判断・調整力がポイント。	現場班による定時の健康観察・夜間巡回、搬送希望者リストの本部共有と優先順位付け、照明・発電機のバッテリー点検・追加手配、急変時の応急対応準備、住民への健康・安全指導、現場と本部・関係機関の情報共有体制強化。	医療スタッフ・資機材の不足、夜間・停電下での健康観察・応急対応の困難、搬送希望者の増加による調整遅延、現場と本部・関係機関間の情報伝達遅延、住民不安・混乱拡大、体調急変や事故への即応困難	道路は胸程度の冠水が継続、住宅街の多くで床上60cm前後の浸水、停電・通信障害・ガス漏洩疑い・感電事故が継続	床上浸水・停電・孤立・感電事故・ガス漏洩・体調不良者・避難所過密・臨時避難所運用・医療資源逼迫	床上浸水・停電・通信障害・感電事故・ガス漏洩疑いが継続し、複数世帯で高齢者や体調不良者が孤立。避難所・サテライト避難所ともに満員に近く、医療スタッフ・医薬品・搬送車両・照明機器の不足が深刻化。夜間対応・健康観察・資機材管理が重要課題となっている。	サテライト避難所の迅速な運用、夜間巡回・健康観察体制の強化、医療スタッフ・資機材（照明・発電機等）の追加手配、現場・本部・避難所間の情報共有徹底、要配慮者名簿の活用と優先救助・搬送、住民への健康・安全指導の徹底、医療機関との連携強化、夜間対応マニュアルの徹底	平成25年台風18号時、同地区で床上浸水・孤立・停電・感電・ガス漏洩・体調不良者・避難所混乱・医療資源不足が同時発生し、臨時避難所開設・医療応援要請が必要となった事例あり	['床上浸水拡大による住民の孤立', '停電・通信障害による情報収集・安否確認の遅れ', '感電・ガス漏洩等の二次災害による人身被害', '体調不良者の救助・搬送遅延', '避難所の過密・衛生悪化', '医療スタッフ・物資不足による健康被害拡大', '住民のパニック拡大']	['電気・ガス設備の浸水による火災・感電・爆発リスク', '交通遮断による救助活動の遅延', '下水道逆流による衛生被害', '避難所の受け入れ混乱', '感染症・生活環境悪化による体調不良者増加']
		1-21	0	発災103分後	夜間対応が続く中、避難所・サテライト避難所で体調不良者・高齢者の健康観察・夜間巡回・応急手当が継続されている。照明・発電機のバッテリー残量が限界に近い現場が複数発生し、追加手配のための現場本部・関係機関との緊急調整が求められている。	現場班（避難誘導・医療・保健師）	『避難所・サテライト避難所で体調不良者や高齢者の健康観察・夜間巡回を継続中。新たな急変者は発生していないが、搬送希望者リストがさらに増加。照明・発電機のバッテリーが限界に近い現場が複数あり、至急追加手配が必要』との現場班からの報告を受け、本部は関係機関と緊急調整を開始した。	夜間で気温がさらに低下し、健康相談・応急手当のニーズが高まっている。医療スタッフ・保健師の現場展開は継続中。搬送希望者の優先順位付けは本部と現場班で再調整中。照明・発電機のバッテリー交換や追加搬入は渋滞や冠水で遅延傾向。	淀川に隣接した標高の低い住宅密集地。南側が窪地で水が集中しやすく、短時間で複合災害（浸水・停電・感電・ガス漏洩など）が発生しやすい。古い住宅が多く、避難所も徒歩圏内に点在。	夜間・医療資源逼迫下での現場主導による健康観察・搬送調整・資機材管理体制の徹底訓練。現場リーダーの判断・調整力強化と本部・関係機関との情報共有・連携強化を狙う。	夜間健康観察・巡回体制の維持、搬送希望者の優先順位付け、照明・発電機等の資機材管理・追加手配、現場と本部・関係機関の迅速な情報共有。現場リーダーの判断・調整力がポイント。	現場班による定時の健康観察・夜間巡回、搬送希望者リストの本部共有と優先順位付け、照明・発電機のバッテリー点検・追加手配、急変時の応急対応準備、住民への健康・安全指導、現場と本部・関係機関の情報共有体制強化。	医療スタッフ・資機材の不足、夜間・停電下での健康観察・応急対応の困難、搬送希望者の増加による調整遅延、現場と本部・関係機関間の情報伝達遅延、住民不安・混乱拡大、体調急変や事故への即応困難	道路は胸程度の冠水が継続、住宅街の多くで床上60cm前後の浸水、停電・通信障害・ガス漏洩疑い・感電事故が継続	床上浸水・停電・孤立・感電事故・ガス漏洩・体調不良者・避難所過密・臨時避難所運用・医療資源逼迫	床上浸水・停電・通信障害・感電事故・ガス漏洩疑いが継続し、複数世帯で高齢者や体調不良者が孤立。避難所・サテライト避難所ともに満員に近く、医療スタッフ・医薬品・搬送車両・照明機器の不足が深刻化。夜間対応・健康観察・資機材管理が重要課題となっている。	サテライト避難所の迅速な運用、夜間巡回・健康観察体制の強化、医療スタッフ・資機材（照明・発電機等）の追加手配、現場・本部・避難所間の情報共有徹底、要配慮者名簿の活用と優先救助・搬送、住民への健康・安全指導の徹底、医療機関との連携強化、夜間対応マニュアルの徹底	平成25年台風18号時、同地区で床上浸水・孤立・停電・感電・ガス漏洩・体調不良者・避難所混乱・医療資源不足が同時発生し、臨時避難所開設・医療応援要請が必要となった事例あり	['床上浸水拡大による住民の孤立', '停電・通信障害による情報収集・安否確認の遅れ', '感電・ガス漏洩等の二次災害による人身被害', '体調不良者の救助・搬送遅延', '避難所の過密・衛生悪化', '医療スタッフ・物資不足による健康被害拡大', '住民のパニック拡大']	['電気・ガス設備の浸水による火災・感電・爆発リスク', '交通遮断による救助活動の遅延', '下水道逆流による衛生被害', '避難所の受け入れ混乱', '感染症・生活環境悪化による体調不良者増加']
		1-22	0	発災106分後	夜間対応が続く中、避難所・サテライト避難所で体調不良者・高齢者の健康観察・夜間巡回・応急手当が継続されている。バッテリー交換・追加搬入の遅延で一部現場の照明・発電機が停止し、現場での安全確保や応急対応に支障が出始めている。	現場班（避難誘導・医療・保健師）	『避難所・サテライト避難所で体調不良者や高齢者の健康観察・夜間巡回を継続中。新たな急変者は発生していないが、照明・発電機のバッテリー切れで一部現場が暗闇となり、応急手当や巡回に支障が出ている。追加搬入は渋滞・冠水で遅延中』との報告。	照明・発電機の追加搬入は本部で調整中だが、道路冠水・渋滞で到着が遅延。医療スタッフ・保健師は手持ちのライトや携帯照明で対応中。夜間の気温低下が続き、住民の健康不安が高まっている。	淀川に隣接した標高の低い住宅密集地。南側が窪地で水が集中しやすく、短時間で複合災害（浸水・停電・感電・ガス漏洩など）が発生しやすい。古い住宅が多く、避難所も徒歩圏内に点在。	夜間・医療資源逼迫下での資機材不足時の現場対応力・情報共有・応急体制維持の訓練。現場リーダーの判断力・本部との連携・住民安全確保を強化する。	照明・発電機など資機材の管理・追加手配、暗闇下での応急体制維持、現場と本部・関係機関の迅速な情報共有、住民の安全・健康管理。現場判断と資機材運用の工夫がポイント。	現場班による照明・発電機のバッテリー点検・手持ち資機材の活用、住民・体調不良者の健康観察・夜間巡回の継続、暗所での安全確保策（誘導灯・携帯照明等）の工夫、追加資機材到着までの応急対応、現場と本部・関係機関の情報共有体制強化。	照明・発電機のバッテリー切れによる夜間対応困難、暗闇下での健康観察・応急手当の遅延、住民不安・混乱拡大、搬送希望者の増加への即応困難、現場と本部間の情報伝達遅延	道路は胸程度の冠水が継続、住宅街の多くで床上60cm前後の浸水、停電・通信障害・ガス漏洩疑い・感電事故が継続	床上浸水・停電・孤立・感電事故・ガス漏洩・体調不良者・避難所過密・臨時避難所運用・医療資源逼迫・資機材不足	床上浸水・停電・通信障害・感電事故・ガス漏洩疑いが継続し、複数世帯で高齢者や体調不良者が孤立。避難所・サテライト避難所ともに満員に近く、医療スタッフ・医薬品・搬送車両・照明機器の不足が深刻化。夜間対応・健康観察・資機材管理が重要課題。照明・発電機のバッテリー切れにより一部現場で応急対応や安全確保に支障が出ている。	サテライト避難所の迅速な運用、夜間巡回・健康観察体制の強化、医療スタッフ・資機材（照明・発電機等）の追加手配、現場・本部・避難所間の情報共有徹底、要配慮者名簿の活用と優先救助・搬送、住民への健康・安全指導の徹底、医療機関との連携強化、夜間対応マニュアルの徹底	平成25年台風18号時、同地区で床上浸水・孤立・停電・感電・ガス漏洩・体調不良者・避難所混乱・医療資源不足・照明不足が同時発生し、臨時避難所開設・医療応援要請が必要となった事例あり	['床上浸水拡大による住民の孤立', '停電・通信障害による情報収集・安否確認の遅れ', '感電・ガス漏洩等の二次災害による人身被害', '体調不良者の救助・搬送遅延', '避難所の過密・衛生悪化', '医療スタッフ・物資不足による健康被害拡大', '照明・発電機バッテリー切れによる夜間対応困難', '住民のパニック拡大']	['電気・ガス設備の浸水による火災・感電・爆発リスク', '交通遮断による救助活動の遅延', '下水道逆流による衛生被害', '避難所の受け入れ混乱', '感染症・生活環境悪化による体調不良者増加']
		1-23	0	発災111分後	夜間対応が続く中、避難所・サテライト避難所の一部で照明・発電機のバッテリー切れが長引き、現場班は手持ち資機材による応急対応を続けている。住民の健康観察・夜間巡回は継続されているが、暗闇下での安全確保や応急手当に課題が出ている。	現場班（避難誘導・医療・保健師）	『避難所・サテライト避難所で体調不良者や高齢者の健康観察、夜間巡回を継続中。照明・発電機のバッテリー切れが続き、一部現場は暗闇で応急手当や巡回に支障が出ている。住民の不安や転倒リスクが高まっている。追加資機材の到着は依然遅延中』との現場班からの報告。	手持ちの懐中電灯や携帯照明を活用中。巡回・応急手当は最小限の明かりで実施。住民の誘導や安全確保に工夫が必要。	淀川に隣接した標高の低い住宅密集地。南側が窪地で水が集中しやすく、短時間で複合災害（浸水・停電・感電・ガス漏洩など）が発生しやすい。古い住宅が多く、避難所も徒歩圏内に点在。	夜間・資機材不足下での現場主導による応急対応、住民安全確保、情報共有・工夫力の強化訓練。現場リーダーの判断力・本部との連携、住民の安全対策徹底を狙う。	照明・発電機不足時の現場運用の工夫、暗所での健康観察・応急手当継続、住民転倒事故等のリスク管理、現場と本部・関係機関の情報共有と追加資機材要請の徹底。	現場班による手持ち照明・誘導灯の最大活用、住民の夜間移動制限や転倒防止策の徹底、健康観察・応急手当の継続、本部への追加資機材要請・状況報告、住民への安全指導・不安解消の声かけ。	資機材不足による応急対応力の低下、暗闇下での転倒事故や健康観察の遅延、住民の不安・混乱拡大、追加資機材搬入の遅延、現場と本部間の情報伝達遅延	道路は胸程度の冠水が継続、住宅街の多くで床上60cm前後の浸水、停電・通信障害・ガス漏洩疑い・感電事故が継続	床上浸水・停電・孤立・感電事故・ガス漏洩・体調不良者・避難所過密・臨時避難所運用・医療資源逼迫・資機材不足・夜間対応困難	床上浸水・停電・通信障害・感電事故・ガス漏洩疑いが継続し、複数世帯で高齢者や体調不良者が孤立。避難所・サテライト避難所ともに満員に近く、医療スタッフ・医薬品・搬送車両・照明機器の不足が深刻化。夜間対応・健康観察・資機材管理が重要課題。照明・発電機のバッテリー切れにより一部現場で応急対応や安全確保に支障が出ている。	サテライト避難所の迅速な運用、夜間巡回・健康観察体制の強化、医療スタッフ・資機材（照明・発電機等）の追加手配、現場・本部・避難所間の情報共有徹底、要配慮者名簿の活用と優先救助・搬送、住民への健康・安全指導の徹底、医療機関との連携強化、夜間対応マニュアルの徹底	平成25年台風18号時、同地区で床上浸水・孤立・停電・感電・ガス漏洩・体調不良者・避難所混乱・医療資源不足・照明不足が同時発生し、臨時避難所開設・医療応援要請が必要となった事例あり	['床上浸水拡大による住民の孤立', '停電・通信障害による情報収集・安否確認の遅れ', '感電・ガス漏洩等の二次災害による人身被害', '体調不良者の救助・搬送遅延', '避難所の過密・衛生悪化', '医療スタッフ・物資不足による健康被害拡大', '照明・発電機バッテリー切れによる夜間対応困難', '住民のパニック拡大']	['電気・ガス設備の浸水による火災・感電・爆発リスク', '交通遮断による救助活動の遅延', '下水道逆流による衛生被害', '避難所の受け入れ混乱', '感染症・生活環境悪化による体調不良者増加']
		1-24	0	発災116分後	夜間対応が続く中、避難所・サテライト避難所の一部で照明・発電機のバッテリー切れが続き、住民の健康観察・夜間巡回・応急手当は手持ちライト・誘導灯等で最低限継続されている。追加資機材搬入の遅延により、現場班は住民の転倒・事故防止や健康不安への声かけ、夜間移動制限の徹底などに注力する。	現場班（避難誘導・医療・保健師）	『避難所・サテライト避難所で体調不良者や高齢者の健康観察、夜間巡回を続けているが、照明・発電機のバッテリー切れが長引き、一部現場は暗闇で応急手当や巡回に支障が出ている。住民の転倒や体調急変リスクが高まっているため、夜間移動制限や安全指導を強化している』との現場班からの報告。	手持ちの懐中電灯や携帯照明を最大限活用中。巡回・応急手当は最小限の明かりで実施。追加資機材の到着は依然遅延。住民の誘導や安全確保に工夫が必要。	淀川に隣接した標高の低い住宅密集地。南側が窪地で水が集中しやすく、短時間で複合災害（浸水・停電・感電・ガス漏洩など）が発生しやすい。古い住宅が多く、避難所も徒歩圏内に点在。	資機材不足・夜間下での現場主導による応急対応、住民安全確保、情報共有・工夫力の強化訓練。現場リーダーの判断力・本部との連携、住民の安全対策徹底を狙う。	照明・発電機不足時の現場運用の工夫、暗所での健康観察・応急手当継続、住民転倒事故等のリスク管理、現場と本部・関係機関の情報共有と追加資機材要請の徹底。	現場班による手持ち照明・誘導灯の最大活用、住民の夜間移動制限や転倒防止策の徹底、健康観察・応急手当の継続、本部への追加資機材要請・状況報告、住民への安全指導・不安解消の声かけ。	資機材不足による応急対応力の低下、暗闇下での転倒事故や健康観察の遅延、住民の不安・混乱拡大、追加資機材搬入の遅延、現場と本部間の情報伝達遅延	道路は胸程度の冠水が継続、住宅街の多くで床上60cm前後の浸水、停電・通信障害・ガス漏洩疑い・感電事故が継続	床上浸水・停電・孤立・感電事故・ガス漏洩・体調不良者・避難所過密・臨時避難所運用・医療資源逼迫・資機材不足・夜間対応困難	床上浸水・停電・通信障害・感電事故・ガス漏洩疑いが継続し、複数世帯で高齢者や体調不良者が孤立。避難所・サテライト避難所ともに満員に近く、医療スタッフ・医薬品・搬送車両・照明機器の不足が深刻化。夜間対応・健康観察・資機材管理が重要課題。照明・発電機のバッテリー切れにより一部現場で応急対応や安全確保に支障が出ている。	サテライト避難所の迅速な運用、夜間巡回・健康観察体制の強化、医療スタッフ・資機材（照明・発電機等）の追加手配、現場・本部・避難所間の情報共有徹底、要配慮者名簿の活用と優先救助・搬送、住民への健康・安全指導の徹底、医療機関との連携強化、夜間対応マニュアルの徹底	平成25年台風18号時、同地区で床上浸水・孤立・停電・感電・ガス漏洩・体調不良者・避難所混乱・医療資源不足・照明不足が同時発生し、臨時避難所開設・医療応援要請が必要となった事例あり	['床上浸水拡大による住民の孤立', '停電・通信障害による情報収集・安否確認の遅れ', '感電・ガス漏洩等の二次災害による人身被害', '体調不良者の救助・搬送遅延', '避難所の過密・衛生悪化', '医療スタッフ・物資不足による健康被害拡大', '照明・発電機バッテリー切れによる夜間対応困難', '住民のパニック拡大']	['電気・ガス設備の浸水による火災・感電・爆発リスク', '交通遮断による救助活動の遅延', '下水道逆流による衛生被害', '避難所の受け入れ混乱', '感染症・生活環境悪化による体調不良者増加']
		1-25	0	発災121分後	追加照明・発電機搬入の遅延が続き、一部避難所・サテライト避難所は依然として暗闇下で最低限の健康観察・応急手当・夜間巡回を継続。現場では住民の転倒・事故防止や体調急変時の対応、夜間移動制限の徹底が続行されている。	現場班（避難誘導・医療・保健師）	『避難所・サテライト避難所で体調不良者や高齢者の健康観察、夜間巡回を続けているが、照明・発電機のバッテリー切れが長引き、一部現場は暗闇で応急手当や巡回に支障が出ている。住民の転倒や体調急変リスクが高まっているため、夜間移動制限や安全指導を継続している』との報告。	手持ちの懐中電灯や携帯照明を最大限活用中。追加資機材の到着は依然として遅延。住民の誘導や安全確保に工夫が必要。転倒事故や体調急変時の連絡方法は現場で再周知済み。	淀川に隣接した標高の低い住宅密集地。南側が窪地で水が集中しやすく、短時間で複合災害（浸水・停電・感電・ガス漏洩など）が発生しやすい。古い住宅が多く、避難所も徒歩圏内に点在。	資機材不足・夜間下での現場主導による応急対応、住民安全確保、情報共有・工夫力の強化訓練。現場リーダーの判断力・本部との連携、住民の安全対策徹底を狙う。	照明・発電機不足時の現場運用の工夫、暗所での健康観察・応急手当継続、住民転倒事故等のリスク管理、現場と本部・関係機関の情報共有と追加資機材要請の徹底。	現場班による手持ち照明・誘導灯の最大活用、住民の夜間移動制限や転倒防止策の徹底、健康観察・応急手当の継続、本部への追加資機材要請・状況報告、住民への安全指導・不安解消の声かけ。	資機材不足による応急対応力の低下、暗闇下での転倒事故や健康観察の遅延、住民の不安・混乱拡大、追加資機材搬入の遅延、現場と本部間の情報伝達遅延	道路は胸程度の冠水が継続、住宅街の多くで床上60cm前後の浸水、停電・通信障害・ガス漏洩疑い・感電事故が継続	床上浸水・停電・孤立・感電事故・ガス漏洩・体調不良者・避難所過密・臨時避難所運用・医療資源逼迫・資機材不足・夜間対応困難	床上浸水・停電・通信障害・感電事故・ガス漏洩疑いが継続し、複数世帯で高齢者や体調不良者が孤立。避難所・サテライト避難所ともに満員に近く、医療スタッフ・医薬品・搬送車両・照明機器の不足が深刻化。夜間対応・健康観察・資機材管理が重要課題。照明・発電機のバッテリー切れにより一部現場で応急対応や安全確保に支障が出ている。	サテライト避難所の迅速な運用、夜間巡回・健康観察体制の強化、医療スタッフ・資機材（照明・発電機等）の追加手配、現場・本部・避難所間の情報共有徹底、要配慮者名簿の活用と優先救助・搬送、住民への健康・安全指導の徹底、医療機関との連携強化、夜間対応マニュアルの徹底	平成25年台風18号時、同地区で床上浸水・孤立・停電・感電・ガス漏洩・体調不良者・避難所混乱・医療資源不足・照明不足が同時発生し、臨時避難所開設・医療応援要請が必要となった事例あり	['床上浸水拡大による住民の孤立', '停電・通信障害による情報収集・安否確認の遅れ', '感電・ガス漏洩等の二次災害による人身被害', '体調不良者の救助・搬送遅延', '避難所の過密・衛生悪化', '医療スタッフ・物資不足による健康被害拡大', '照明・発電機バッテリー切れによる夜間対応困難', '住民のパニック拡大']	['電気・ガス設備の浸水による火災・感電・爆発リスク', '交通遮断による救助活動の遅延', '下水道逆流による衛生被害', '避難所の受け入れ混乱', '感染症・生活環境悪化による体調不良者増加']
		1-26	0	発災127分後	追加照明・発電機の搬入が依然として遅延しており、一部避難所・サテライト避難所は暗闇下で最低限の健康観察・応急手当・夜間巡回を継続。現場では住民の転倒・事故防止や体調急変時の対応、夜間移動制限の徹底が続行されている。	現場班（避難誘導・医療・保健師）	『避難所・サテライト避難所で体調不良者や高齢者の健康観察、夜間巡回を続けているが、照明・発電機のバッテリー切れが長引き、一部現場は暗闇で応急手当や巡回に支障が出ている。住民の転倒や体調急変リスクが高まっているため、夜間移動制限や安全指導を継続している』との報告。	手持ちの懐中電灯や携帯照明を最大限活用中。追加資機材の到着は依然として遅延。住民の誘導や安全確保に工夫が必要。転倒事故や体調急変時の連絡方法は現場で再周知済み。	淀川に隣接した標高の低い住宅密集地。南側が窪地で水が集中しやすく、短時間で複合災害（浸水・停電・感電・ガス漏洩など）が発生しやすい。古い住宅が多く、避難所も徒歩圏内に点在。	資機材不足・夜間下での現場主導による応急対応、住民安全確保、情報共有・工夫力の強化訓練。現場リーダーの判断力・本部との連携、住民の安全対策徹底を狙う。	照明・発電機不足時の現場運用の工夫、暗所での健康観察・応急手当継続、住民転倒事故等のリスク管理、現場と本部・関係機関の情報共有と追加資機材要請の徹底。	現場班による手持ち照明・誘導灯の最大活用、住民の夜間移動制限や転倒防止策の徹底、健康観察・応急手当の継続、本部への追加資機材要請・状況報告、住民への安全指導・不安解消の声かけ。	資機材不足による応急対応力の低下、暗闇下での転倒事故や健康観察の遅延、住民の不安・混乱拡大、追加資機材搬入の遅延、現場と本部間の情報伝達遅延	道路は胸程度の冠水が継続、住宅街の多くで床上60cm前後の浸水、停電・通信障害・ガス漏洩疑い・感電事故が継続	床上浸水・停電・孤立・感電事故・ガス漏洩・体調不良者・避難所過密・臨時避難所運用・医療資源逼迫・資機材不足・夜間対応困難	床上浸水・停電・通信障害・感電事故・ガス漏洩疑いが継続し、複数世帯で高齢者や体調不良者が孤立。避難所・サテライト避難所ともに満員に近く、医療スタッフ・医薬品・搬送車両・照明機器の不足が深刻化。夜間対応・健康観察・資機材管理が重要課題。照明・発電機のバッテリー切れにより一部現場で応急対応や安全確保に支障が出ている。	サテライト避難所の迅速な運用、夜間巡回・健康観察体制の強化、医療スタッフ・資機材（照明・発電機等）の追加手配、現場・本部・避難所間の情報共有徹底、要配慮者名簿の活用と優先救助・搬送、住民への健康・安全指導の徹底、医療機関との連携強化、夜間対応マニュアルの徹底	平成25年台風18号時、同地区で床上浸水・孤立・停電・感電・ガス漏洩・体調不良者・避難所混乱・医療資源不足・照明不足が同時発生し、臨時避難所開設・医療応援要請が必要となった事例あり	['床上浸水拡大による住民の孤立', '停電・通信障害による情報収集・安否確認の遅れ', '感電・ガス漏洩等の二次災害による人身被害', '体調不良者の救助・搬送遅延', '避難所の過密・衛生悪化', '医療スタッフ・物資不足による健康被害拡大', '照明・発電機バッテリー切れによる夜間対応困難', '住民のパニック拡大']	['電気・ガス設備の浸水による火災・感電・爆発リスク', '交通遮断による救助活動の遅延', '下水道逆流による衛生被害', '避難所の受け入れ混乱', '感染症・生活環境悪化による体調不良者増加']
		1-27	0	発災132分後	追加照明・発電機の搬入が依然として遅延しており、一部避難所・サテライト避難所は暗闇下で最低限の健康観察・応急手当・夜間巡回を継続。住民の転倒・事故防止や体調急変時の対応、夜間移動制限の徹底が続行されている。	現場班（避難誘導・医療・保健師）	『避難所・サテライト避難所で体調不良者や高齢者の健康観察、夜間巡回を続けているが、照明・発電機のバッテリー切れが長引き、一部現場は暗闇で応急手当や巡回に支障が出ている。住民の転倒や体調急変リスクが高まっているため、夜間移動制限や安全指導を継続している』との報告。	手持ちの懐中電灯や携帯照明を最大限活用中。追加資機材の到着は依然として遅延。住民の誘導や安全確保に工夫が必要。転倒事故や体調急変時の連絡方法は現場で再周知済み。	淀川に隣接した標高の低い住宅密集地。南側が窪地で水が集中しやすく、短時間で複合災害（浸水・停電・感電・ガス漏洩など）が発生しやすい。古い住宅が多く、避難所も徒歩圏内に点在。	資機材不足・夜間下での現場主導による応急対応、住民安全確保、情報共有・工夫力の強化訓練。現場リーダーの判断力・本部との連携、住民の安全対策徹底を狙う。	照明・発電機不足時の現場運用の工夫、暗所での健康観察・応急手当継続、住民転倒事故等のリスク管理、現場と本部・関係機関の情報共有と追加資機材要請の徹底。	現場班による手持ち照明・誘導灯の最大活用、住民の夜間移動制限や転倒防止策の徹底、健康観察・応急手当の継続、本部への追加資機材要請・状況報告、住民への安全指導・不安解消の声かけ。	資機材不足による応急対応力の低下、暗闇下での転倒事故や健康観察の遅延、住民の不安・混乱拡大、追加資機材搬入の遅延、現場と本部間の情報伝達遅延	道路は胸程度の冠水が継続、住宅街の多くで床上60cm前後の浸水、停電・通信障害・ガス漏洩疑い・感電事故が継続	床上浸水・停電・孤立・感電事故・ガス漏洩・体調不良者・避難所過密・臨時避難所運用・医療資源逼迫・資機材不足・夜間対応困難	床上浸水・停電・通信障害・感電事故・ガス漏洩疑いが継続し、複数世帯で高齢者や体調不良者が孤立。避難所・サテライト避難所ともに満員に近く、医療スタッフ・医薬品・搬送車両・照明機器の不足が深刻化。夜間対応・健康観察・資機材管理が重要課題。照明・発電機のバッテリー切れにより一部現場で応急対応や安全確保に支障が出ている。	サテライト避難所の迅速な運用、夜間巡回・健康観察体制の強化、医療スタッフ・資機材（照明・発電機等）の追加手配、現場・本部・避難所間の情報共有徹底、要配慮者名簿の活用と優先救助・搬送、住民への健康・安全指導の徹底、医療機関との連携強化、夜間対応マニュアルの徹底	平成25年台風18号時、同地区で床上浸水・孤立・停電・感電・ガス漏洩・体調不良者・避難所混乱・医療資源不足・照明不足が同時発生し、臨時避難所開設・医療応援要請が必要となった事例あり	['床上浸水拡大による住民の孤立', '停電・通信障害による情報収集・安否確認の遅れ', '感電・ガス漏洩等の二次災害による人身被害', '体調不良者の救助・搬送遅延', '避難所の過密・衛生悪化', '医療スタッフ・物資不足による健康被害拡大', '照明・発電機バッテリー切れによる夜間対応困難', '住民のパニック拡大']	['電気・ガス設備の浸水による火災・感電・爆発リスク', '交通遮断による救助活動の遅延', '下水道逆流による衛生被害', '避難所の受け入れ混乱', '感染症・生活環境悪化による体調不良者増加']
		1-28	0	発災137分後	追加照明・発電機の搬入が依然として遅延しており、一部避難所・サテライト避難所は暗闇下で最低限の健康観察・応急手当・夜間巡回を継続。住民の転倒・事故防止や体調急変時の対応、夜間移動制限の徹底が続行されている。	現場班（避難誘導・医療・保健師）	『避難所・サテライト避難所で体調不良者や高齢者の健康観察、夜間巡回を続けているが、照明・発電機のバッテリー切れが長引き、一部現場は暗闇で応急手当や巡回に支障が出ている。住民の転倒や体調急変リスクが高まっているため、夜間移動制限や安全指導を継続している』との報告。	手持ちの懐中電灯や携帯照明を最大限活用中。追加資機材の到着は依然として遅延。住民の誘導や安全確保に工夫が必要。転倒事故や体調急変時の連絡方法は現場で再周知済み。	淀川に隣接した標高の低い住宅密集地。南側が窪地で水が集中しやすく、短時間で複合災害（浸水・停電・感電・ガス漏洩など）が発生しやすい。古い住宅が多く、避難所も徒歩圏内に点在。	資機材不足・夜間下での現場主導による応急対応、住民安全確保、情報共有・工夫力の強化訓練。現場リーダーの判断力・本部との連携、住民の安全対策徹底を狙う。	照明・発電機不足時の現場運用の工夫、暗所での健康観察・応急手当継続、住民転倒事故等のリスク管理、現場と本部・関係機関の情報共有と追加資機材要請の徹底。	現場班による手持ち照明・誘導灯の最大活用、住民の夜間移動制限や転倒防止策の徹底、健康観察・応急手当の継続、本部への追加資機材要請・状況報告、住民への安全指導・不安解消の声かけ。	資機材不足による応急対応力の低下、暗闇下での転倒事故や健康観察の遅延、住民の不安・混乱拡大、追加資機材搬入の遅延、現場と本部間の情報伝達遅延	道路は胸程度の冠水が継続、住宅街の多くで床上60cm前後の浸水、停電・通信障害・ガス漏洩疑い・感電事故が継続	床上浸水・停電・孤立・感電事故・ガス漏洩・体調不良者・避難所過密・臨時避難所運用・医療資源逼迫・資機材不足・夜間対応困難	床上浸水・停電・通信障害・感電事故・ガス漏洩疑いが継続し、複数世帯で高齢者や体調不良者が孤立。避難所・サテライト避難所ともに満員に近く、医療スタッフ・医薬品・搬送車両・照明機器の不足が深刻化。夜間対応・健康観察・資機材管理が重要課題。照明・発電機のバッテリー切れにより一部現場で応急対応や安全確保に支障が出ている。	サテライト避難所の迅速な運用、夜間巡回・健康観察体制の強化、医療スタッフ・資機材（照明・発電機等）の追加手配、現場・本部・避難所間の情報共有徹底、要配慮者名簿の活用と優先救助・搬送、住民への健康・安全指導の徹底、医療機関との連携強化、夜間対応マニュアルの徹底	平成25年台風18号時、同地区で床上浸水・孤立・停電・感電・ガス漏洩・体調不良者・避難所混乱・医療資源不足・照明不足が同時発生し、臨時避難所開設・医療応援要請が必要となった事例あり	['床上浸水拡大による住民の孤立', '停電・通信障害による情報収集・安否確認の遅れ', '感電・ガス漏洩等の二次災害による人身被害', '体調不良者の救助・搬送遅延', '避難所の過密・衛生悪化', '医療スタッフ・物資不足による健康被害拡大', '照明・発電機バッテリー切れによる夜間対応困難', '住民のパニック拡大']	['電気・ガス設備の浸水による火災・感電・爆発リスク', '交通遮断による救助活動の遅延', '下水道逆流による衛生被害', '避難所の受け入れ混乱', '感染症・生活環境悪化による体調不良者増加']
		1-29	0	発災141分後	照明・発電機のバッテリー切れが長期化し、一部避難所・サテライト避難所では暗闇下で最低限の健康観察・応急手当・夜間巡回を継続。住民の転倒・事故防止や体調急変時の対応、夜間移動制限の徹底が続行されている。	現場班（避難誘導・医療・保健師）	『避難所・サテライト避難所で体調不良者や高齢者の健康観察、夜間巡回を続けているが、照明・発電機のバッテリー切れが続き、一部現場は暗闇で応急手当や巡回に支障が出ている。住民の転倒や体調急変リスクが高まっているため、夜間移動制限や安全指導を継続している』との報告。	手持ちの懐中電灯や携帯照明を最大限活用中。追加資機材の到着は依然として遅延中。住民の誘導や安全確保に工夫が必要。転倒事故や体調急変時の連絡方法は現場で再周知済み。	淀川に隣接した標高の低い住宅密集地。南側が窪地で水が集中しやすく、短時間で複合災害（浸水・停電・感電・ガス漏洩など）が発生しやすい。古い住宅が多く、避難所も徒歩圏内に点在。	資機材不足・夜間下での現場主導による応急対応、住民安全確保、情報共有・工夫力の強化訓練。現場リーダーの判断力・本部との連携、住民の安全対策徹底を狙う。	照明・発電機不足時の現場運用の工夫、暗所での健康観察・応急手当継続、住民転倒事故等のリスク管理、現場と本部・関係機関の情報共有と追加資機材要請の徹底。	現場班による手持ち照明・誘導灯の最大活用、住民の夜間移動制限や転倒防止策の徹底、健康観察・応急手当の継続、本部への追加資機材要請・状況報告、住民への安全指導・不安解消の声かけ。	資機材不足による応急対応力の低下、暗闇下での転倒事故や健康観察の遅延、住民の不安・混乱拡大、追加資機材搬入の遅延、現場と本部間の情報伝達遅延	道路は胸程度の冠水が継続、住宅街の多くで床上60cm前後の浸水、停電・通信障害・ガス漏洩疑い・感電事故が継続	床上浸水・停電・孤立・感電事故・ガス漏洩・体調不良者・避難所過密・臨時避難所運用・医療資源逼迫・資機材不足・夜間対応困難	床上浸水・停電・通信障害・感電事故・ガス漏洩疑いが継続し、複数世帯で高齢者や体調不良者が孤立。避難所・サテライト避難所ともに満員に近く、医療スタッフ・医薬品・搬送車両・照明機器の不足が深刻化。夜間対応・健康観察・資機材管理が重要課題。照明・発電機のバッテリー切れにより一部現場で応急対応や安全確保に支障が出ている。	サテライト避難所の迅速な運用、夜間巡回・健康観察体制の強化、医療スタッフ・資機材（照明・発電機等）の追加手配、現場・本部・避難所間の情報共有徹底、要配慮者名簿の活用と優先救助・搬送、住民への健康・安全指導の徹底、医療機関との連携強化、夜間対応マニュアルの徹底	平成25年台風18号時、同地区で床上浸水・孤立・停電・感電・ガス漏洩・体調不良者・避難所混乱・医療資源不足・照明不足が同時発生し、臨時避難所開設・医療応援要請が必要となった事例あり	['床上浸水拡大による住民の孤立', '停電・通信障害による情報収集・安否確認の遅れ', '感電・ガス漏洩等の二次災害による人身被害', '体調不良者の救助・搬送遅延', '避難所の過密・衛生悪化', '医療スタッフ・物資不足による健康被害拡大', '照明・発電機バッテリー切れによる夜間対応困難', '住民のパニック拡大']	['電気・ガス設備の浸水による火災・感電・爆発リスク', '交通遮断による救助活動の遅延', '下水道逆流による衛生被害', '避難所の受け入れ混乱', '感染症・生活環境悪化による体調不良者増加']
		1-30	0	発災146分後	追加照明・発電機の搬入が依然として遅延しており、一部避難所・サテライト避難所は暗闇下で最低限の健康観察・応急手当・夜間巡回を継続。住民の転倒・事故防止や体調急変時の対応、夜間移動制限の徹底が続行されている。	現場班（避難誘導・医療・保健師）	『避難所・サテライト避難所で体調不良者や高齢者の健康観察、夜間巡回を続けているが、照明・発電機のバッテリー切れが長引き、一部現場は暗闇で応急手当や巡回に支障が出ている。住民の転倒や体調急変リスクが高まっているため、夜間移動制限や安全指導を継続している』との報告。	手持ちの懐中電灯や携帯照明を最大限活用中。追加資機材の到着は依然として遅延。住民の誘導や安全確保に工夫が必要。転倒事故や体調急変時の連絡方法は現場で再周知済み。	淀川に隣接した標高の低い住宅密集地。南側が窪地で水が集中しやすく、短時間で複合災害（浸水・停電・感電・ガス漏洩など）が発生しやすい。古い住宅が多く、避難所も徒歩圏内に点在。	資機材不足・夜間下での現場主導による応急対応、住民安全確保、情報共有・工夫力の強化訓練。現場リーダーの判断力・本部との連携、住民の安全対策徹底を狙う。	照明・発電機不足時の現場運用の工夫、暗所での健康観察・応急手当継続、住民転倒事故等のリスク管理、現場と本部・関係機関の情報共有と追加資機材要請の徹底。	現場班による手持ち照明・誘導灯の最大活用、住民の夜間移動制限や転倒防止策の徹底、健康観察・応急手当の継続、本部への追加資機材要請・状況報告、住民への安全指導・不安解消の声かけ。	資機材不足による応急対応力の低下、暗闇下での転倒事故や健康観察の遅延、住民の不安・混乱拡大、追加資機材搬入の遅延、現場と本部間の情報伝達遅延	道路は胸程度の冠水が継続、住宅街の多くで床上60cm前後の浸水、停電・通信障害・ガス漏洩疑い・感電事故が継続	床上浸水・停電・孤立・感電事故・ガス漏洩・体調不良者・避難所過密・臨時避難所運用・医療資源逼迫・資機材不足・夜間対応困難	床上浸水・停電・通信障害・感電事故・ガス漏洩疑いが継続し、複数世帯で高齢者や体調不良者が孤立。避難所・サテライト避難所ともに満員に近く、医療スタッフ・医薬品・搬送車両・照明機器の不足が深刻化。夜間対応・健康観察・資機材管理が重要課題。照明・発電機のバッテリー切れにより一部現場で応急対応や安全確保に支障が出ている。	サテライト避難所の迅速な運用、夜間巡回・健康観察体制の強化、医療スタッフ・資機材（照明・発電機等）の追加手配、現場・本部・避難所間の情報共有徹底、要配慮者名簿の活用と優先救助・搬送、住民への健康・安全指導の徹底、医療機関との連携強化、夜間対応マニュアルの徹底	平成25年台風18号時、同地区で床上浸水・孤立・停電・感電・ガス漏洩・体調不良者・避難所混乱・医療資源不足・照明不足が同時発生し、臨時避難所開設・医療応援要請が必要となった事例あり	['床上浸水拡大による住民の孤立', '停電・通信障害による情報収集・安否確認の遅れ', '感電・ガス漏洩等の二次災害による人身被害', '体調不良者の救助・搬送遅延', '避難所の過密・衛生悪化', '医療スタッフ・物資不足による健康被害拡大', '照明・発電機バッテリー切れによる夜間対応困難', '住民のパニック拡大']	['電気・ガス設備の浸水による火災・感電・爆発リスク', '交通遮断による救助活動の遅延', '下水道逆流による衛生被害', '避難所の受け入れ混乱', '感染症・生活環境悪化による体調不良者増加']
		1-31	0	発災151分後	照明・発電機のバッテリー切れが長期化し、一部避難所・サテライト避難所では引き続き暗闇下で最低限の健康観察・応急手当・夜間巡回を継続。住民の転倒や体調急変リスクが高まっており、現場では夜間移動制限と応急手当マニュアルの再確認、安全指導の強化が続行されている。	現場班（避難誘導・医療・保健師）	『避難所・サテライト避難所で体調不良者や高齢者の健康観察、夜間巡回を続けているが、照明・発電機のバッテリー切れが続き、一部現場は暗闇で応急手当や巡回に支障が出ている。住民の転倒や体調急変リスクが高まっているため、夜間移動制限や安全指導、応急手当マニュアルの再確認を現場で実施中』との報告。	手持ちの懐中電灯や携帯照明を最大限活用中。追加資機材は依然として到着せず、住民の誘導や安全確保に工夫が必要。転倒事故や体調急変時の連絡方法は現場で再周知済み。	淀川に隣接した標高の低い住宅密集地。南側が窪地で水が集中しやすく、短時間で複合災害（浸水・停電・感電・ガス漏洩など）が発生しやすい。古い住宅が多く、避難所も徒歩圏内に点在。	資機材不足・夜間下での現場主導による応急対応・住民安全確保・情報共有・現場判断力の強化訓練。現場リーダーの判断・連携力、住民の安全対策徹底、住民不安への対応力向上を狙う。	資機材不足時の応急照明・誘導灯活用、夜間巡回・健康観察・住民安全指導、現場と本部・関係機関の情報共有・追加要請、住民不安・転倒リスク管理、応急手当マニュアルの再徹底。	現場班による手持ち照明・誘導灯の最大活用、住民の夜間移動制限や転倒防止策の徹底、健康観察・応急手当の継続、本部への追加資機材要請・状況報告、住民への安全指導・不安解消の声かけ、応急手当マニュアルの再確認・周知。	資機材不足による応急対応力の低下、暗闇下での転倒事故や健康観察の遅延、住民の不安・混乱拡大、追加資機材搬入の遅延、現場と本部間の情報伝達遅延、体調急変や事故への即応困難	道路は胸程度の冠水が継続、住宅街の多くで床上60cm前後の浸水、停電・通信障害・ガス漏洩疑い・感電事故が継続	床上浸水・停電・孤立・感電事故・ガス漏洩・体調不良者・避難所過密・臨時避難所運用・医療資源逼迫・資機材不足・夜間対応困難	床上浸水・停電・通信障害・感電事故・ガス漏洩疑いが継続し、複数世帯で高齢者や体調不良者が孤立。避難所・サテライト避難所ともに満員に近く、医療スタッフ・医薬品・搬送車両・照明機器の不足が深刻化。夜間対応・健康観察・資機材管理が重要課題。照明・発電機のバッテリー切れにより一部現場で応急対応や安全確保に支障が出ている。	サテライト避難所の迅速な運用、夜間巡回・健康観察体制の強化、医療スタッフ・資機材（照明・発電機等）の追加手配、現場・本部・避難所間の情報共有徹底、要配慮者名簿の活用と優先救助・搬送、住民への健康・安全指導の徹底、医療機関との連携強化、夜間対応マニュアルの徹底	平成25年台風18号時、同地区で床上浸水・孤立・停電・感電・ガス漏洩・体調不良者・避難所混乱・医療資源不足・照明不足が同時発生し、臨時避難所開設・医療応援要請が必要となった事例あり	['床上浸水拡大による住民の孤立', '停電・通信障害による情報収集・安否確認の遅れ', '感電・ガス漏洩等の二次災害による人身被害', '体調不良者の救助・搬送遅延', '避難所の過密・衛生悪化', '医療スタッフ・物資不足による健康被害拡大', '照明・発電機バッテリー切れによる夜間対応困難', '住民のパニック拡大']	['電気・ガス設備の浸水による火災・感電・爆発リスク', '交通遮断による救助活動の遅延', '下水道逆流による衛生被害', '避難所の受け入れ混乱', '感染症・生活環境悪化による体調不良者増加']
		1-32	0	発災157分後	照明・発電機のバッテリー切れが長期化し、一部避難所・サテライト避難所では引き続き暗闇下で最低限の健康観察・応急手当・夜間巡回を継続。住民の転倒や体調急変リスクが高まっており、現場では夜間移動制限と応急手当マニュアルの再確認、安全指導の強化が続行されている。	現場班（避難誘導・医療・保健師）	『避難所・サテライト避難所で体調不良者や高齢者の健康観察、夜間巡回を続けているが、照明・発電機のバッテリー切れが続き、一部現場は暗闇で応急手当や巡回に支障が出ている。住民の転倒や体調急変リスクが高まっているため、夜間移動制限や安全指導、応急手当マニュアルの再確認を現場で実施中』との報告。	手持ちの懐中電灯や携帯照明を最大限活用中。追加資機材は依然として到着せず、住民の誘導や安全確保に工夫が必要。転倒事故や体調急変時の連絡方法は現場で再周知済み。	淀川に隣接した標高の低い住宅密集地。南側が窪地で水が集中しやすく、短時間で複合災害（浸水・停電・感電・ガス漏洩など）が発生しやすい。古い住宅が多く、避難所も徒歩圏内に点在。	資機材不足・夜間下での現場主導による応急対応・住民安全確保・情報共有・現場判断力の強化訓練。現場リーダーの判断・連携力、住民の安全対策徹底、住民不安への対応力向上を狙う。	資機材不足時の応急照明・誘導灯活用、夜間巡回・健康観察・住民安全指導、現場と本部・関係機関の情報共有・追加要請、住民不安・転倒リスク管理、応急手当マニュアルの再徹底。	現場班による手持ち照明・誘導灯の最大活用、住民の夜間移動制限や転倒防止策の徹底、健康観察・応急手当の継続、本部への追加資機材要請・状況報告、住民への安全指導・不安解消の声かけ、応急手当マニュアルの再確認・周知。	資機材不足による応急対応力の低下、暗闇下での転倒事故や健康観察の遅延、住民の不安・混乱拡大、追加資機材搬入の遅延、現場と本部間の情報伝達遅延、体調急変や事故への即応困難	道路は胸程度の冠水が継続、住宅街の多くで床上60cm前後の浸水、停電・通信障害・ガス漏洩疑い・感電事故が継続	床上浸水・停電・孤立・感電事故・ガス漏洩・体調不良者・避難所過密・臨時避難所運用・医療資源逼迫・資機材不足・夜間対応困難	床上浸水・停電・通信障害・感電事故・ガス漏洩疑いが継続し、複数世帯で高齢者や体調不良者が孤立。避難所・サテライト避難所ともに満員に近く、医療スタッフ・医薬品・搬送車両・照明機器の不足が深刻化。夜間対応・健康観察・資機材管理が重要課題。照明・発電機のバッテリー切れにより一部現場で応急対応や安全確保に支障が出ている。	サテライト避難所の迅速な運用、夜間巡回・健康観察体制の強化、医療スタッフ・資機材（照明・発電機等）の追加手配、現場・本部・避難所間の情報共有徹底、要配慮者名簿の活用と優先救助・搬送、住民への健康・安全指導の徹底、医療機関との連携強化、夜間対応マニュアルの徹底	平成25年台風18号時、同地区で床上浸水・孤立・停電・感電・ガス漏洩・体調不良者・避難所混乱・医療資源不足・照明不足が同時発生し、臨時避難所開設・医療応援要請が必要となった事例あり	['床上浸水拡大による住民の孤立', '停電・通信障害による情報収集・安否確認の遅れ', '感電・ガス漏洩等の二次災害による人身被害', '体調不良者の救助・搬送遅延', '避難所の過密・衛生悪化', '医療スタッフ・物資不足による健康被害拡大', '照明・発電機バッテリー切れによる夜間対応困難', '住民のパニック拡大']	['電気・ガス設備の浸水による火災・感電・爆発リスク', '交通遮断による救助活動の遅延', '下水道逆流による衛生被害', '避難所の受け入れ混乱', '感染症・生活環境悪化による体調不良者増加']
		1-33	0	発災163分後	照明・発電機のバッテリー切れが長期化し、一部避難所・サテライト避難所では引き続き暗闇下で最低限の健康観察・応急手当・夜間巡回を継続。住民の転倒や体調急変リスクが高まっており、現場では夜間移動制限と応急手当マニュアルの再確認、安全指導の強化が続行されている。	現場班（避難誘導・医療・保健師）	『避難所・サテライト避難所で体調不良者や高齢者の健康観察、夜間巡回を続けているが、照明・発電機のバッテリー切れが続き、一部現場は暗闇で応急手当や巡回に支障が出ている。住民の転倒や体調急変リスクが高まっているため、夜間移動制限や安全指導、応急手当マニュアルの再確認を現場で実施中』との報告。	手持ちの懐中電灯や携帯照明を最大限活用中。追加資機材は依然として到着せず、住民の誘導や安全確保に工夫が必要。転倒事故や体調急変時の連絡方法は現場で再周知済み。	淀川に隣接した標高の低い住宅密集地。南側が窪地で水が集中しやすく、短時間で複合災害（浸水・停電・感電・ガス漏洩など）が発生しやすい。古い住宅が多く、避難所も徒歩圏内に点在。	資機材不足・夜間下での現場主導による応急対応・住民安全確保・情報共有・現場判断力の強化訓練。現場リーダーの判断・連携力、住民の安全対策徹底、住民不安への対応力向上を狙う。	資機材不足時の応急照明・誘導灯活用、夜間巡回・健康観察・住民安全指導、現場と本部・関係機関の情報共有・追加要請、住民不安・転倒リスク管理、応急手当マニュアルの再徹底。	現場班による手持ち照明・誘導灯の最大活用、住民の夜間移動制限や転倒防止策の徹底、健康観察・応急手当の継続、本部への追加資機材要請・状況報告、住民への安全指導・不安解消の声かけ、応急手当マニュアルの再確認・周知。	資機材不足による応急対応力の低下、暗闇下での転倒事故や健康観察の遅延、住民の不安・混乱拡大、追加資機材搬入の遅延、現場と本部間の情報伝達遅延、体調急変や事故への即応困難	道路は胸程度の冠水が継続、住宅街の多くで床上60cm前後の浸水、停電・通信障害・ガス漏洩疑い・感電事故が継続	床上浸水・停電・孤立・感電事故・ガス漏洩・体調不良者・避難所過密・臨時避難所運用・医療資源逼迫・資機材不足・夜間対応困難	床上浸水・停電・通信障害・感電事故・ガス漏洩疑いが継続し、複数世帯で高齢者や体調不良者が孤立。避難所・サテライト避難所ともに満員に近く、医療スタッフ・医薬品・搬送車両・照明機器の不足が深刻化。夜間対応・健康観察・資機材管理が重要課題。照明・発電機のバッテリー切れにより一部現場で応急対応や安全確保に支障が出ている。	サテライト避難所の迅速な運用、夜間巡回・健康観察体制の強化、医療スタッフ・資機材（照明・発電機等）の追加手配、現場・本部・避難所間の情報共有徹底、要配慮者名簿の活用と優先救助・搬送、住民への健康・安全指導の徹底、医療機関との連携強化、夜間対応マニュアルの徹底	平成25年台風18号時、同地区で床上浸水・孤立・停電・感電・ガス漏洩・体調不良者・避難所混乱・医療資源不足・照明不足が同時発生し、臨時避難所開設・医療応援要請が必要となった事例あり	['床上浸水拡大による住民の孤立', '停電・通信障害による情報収集・安否確認の遅れ', '感電・ガス漏洩等の二次災害による人身被害', '体調不良者の救助・搬送遅延', '避難所の過密・衛生悪化', '医療スタッフ・物資不足による健康被害拡大', '照明・発電機バッテリー切れによる夜間対応困難', '住民のパニック拡大']	['電気・ガス設備の浸水による火災・感電・爆発リスク', '交通遮断による救助活動の遅延', '下水道逆流による衛生被害', '避難所の受け入れ混乱', '感染症・生活環境悪化による体調不良者増加']
		1-34	0	発災167分後	照明・発電機のバッテリー切れが長期化し、一部避難所・サテライト避難所では引き続き暗闇下で最低限の健康観察・応急手当・夜間巡回を継続。住民の転倒や体調急変リスクが高まっており、現場では夜間移動制限と応急手当マニュアルの再確認、安全指導の強化が続行されている。	現場班（避難誘導・医療・保健師）	『避難所・サテライト避難所で体調不良者や高齢者の健康観察、夜間巡回を続けているが、照明・発電機のバッテリー切れが続き、一部現場は暗闇で応急手当や巡回に支障が出ている。住民の転倒や体調急変リスクが高まっているため、夜間移動制限や安全指導、応急手当マニュアルの再確認を現場で実施中』との報告。	手持ちの懐中電灯や携帯照明を最大限活用中。追加資機材は依然として到着せず、住民の誘導や安全確保に工夫が必要。転倒事故や体調急変時の連絡方法は現場で再周知済み。	淀川に隣接した標高の低い住宅密集地。南側が窪地で水が集中しやすく、短時間で複合災害（浸水・停電・感電・ガス漏洩など）が発生しやすい。古い住宅が多く、避難所も徒歩圏内に点在。	資機材不足・夜間下での現場主導による応急対応・住民安全確保・情報共有・現場判断力の強化訓練。現場リーダーの判断・連携力、住民の安全対策徹底、住民不安への対応力向上を狙う。	資機材不足時の応急照明・誘導灯活用、夜間巡回・健康観察・住民安全指導、現場と本部・関係機関の情報共有・追加要請、住民不安・転倒リスク管理、応急手当マニュアルの再徹底。	現場班による手持ち照明・誘導灯の最大活用、住民の夜間移動制限や転倒防止策の徹底、健康観察・応急手当の継続、本部への追加資機材要請・状況報告、住民への安全指導・不安解消の声かけ、応急手当マニュアルの再確認・周知。	資機材不足による応急対応力の低下、暗闇下での転倒事故や健康観察の遅延、住民の不安・混乱拡大、追加資機材搬入の遅延、現場と本部間の情報伝達遅延、体調急変や事故への即応困難	道路は胸程度の冠水が継続、住宅街の多くで床上60cm前後の浸水、停電・通信障害・ガス漏洩疑い・感電事故が継続	床上浸水・停電・孤立・感電事故・ガス漏洩・体調不良者・避難所過密・臨時避難所運用・医療資源逼迫・資機材不足・夜間対応困難	床上浸水・停電・通信障害・感電事故・ガス漏洩疑いが継続し、複数世帯で高齢者や体調不良者が孤立。避難所・サテライト避難所ともに満員に近く、医療スタッフ・医薬品・搬送車両・照明機器の不足が深刻化。夜間対応・健康観察・資機材管理が重要課題。照明・発電機のバッテリー切れにより一部現場で応急対応や安全確保に支障が出ている。	サテライト避難所の迅速な運用、夜間巡回・健康観察体制の強化、医療スタッフ・資機材（照明・発電機等）の追加手配、現場・本部・避難所間の情報共有徹底、要配慮者名簿の活用と優先救助・搬送、住民への健康・安全指導の徹底、医療機関との連携強化、夜間対応マニュアルの徹底	平成25年台風18号時、同地区で床上浸水・孤立・停電・感電・ガス漏洩・体調不良者・避難所混乱・医療資源不足・照明不足が同時発生し、臨時避難所開設・医療応援要請が必要となった事例あり	['床上浸水拡大による住民の孤立', '停電・通信障害による情報収集・安否確認の遅れ', '感電・ガス漏洩等の二次災害による人身被害', '体調不良者の救助・搬送遅延', '避難所の過密・衛生悪化', '医療スタッフ・物資不足による健康被害拡大', '照明・発電機バッテリー切れによる夜間対応困難', '住民のパニック拡大']	['電気・ガス設備の浸水による火災・感電・爆発リスク', '交通遮断による救助活動の遅延', '下水道逆流による衛生被害', '避難所の受け入れ混乱', '感染症・生活環境悪化による体調不良者増加']
		1-35	0	発災174分後	照明・発電機のバッテリー切れが長期化し、一部避難所・サテライト避難所では引き続き暗闇下で最低限の健康観察・応急手当・夜間巡回を継続。住民の転倒や体調急変リスクが高まっており、現場では夜間移動制限と応急手当マニュアルの再確認、安全指導の強化が続行されている。	現場班（避難誘導・医療・保健師）	『避難所・サテライト避難所で体調不良者や高齢者の健康観察、夜間巡回を続けているが、照明・発電機のバッテリー切れが続き、一部現場は暗闇で応急手当や巡回に支障が出ている。住民の転倒や体調急変リスクが高まっているため、夜間移動制限や安全指導、応急手当マニュアルの再確認を現場で実施中』との報告。	手持ちの懐中電灯や携帯照明を最大限活用中。追加資機材は依然として到着せず、住民の誘導や安全確保に工夫が必要。転倒事故や体調急変時の連絡方法は現場で再周知済み。	淀川に隣接した標高の低い住宅密集地。南側が窪地で水が集中しやすく、短時間で複合災害（浸水・停電・感電・ガス漏洩など）が発生しやすい。古い住宅が多く、避難所も徒歩圏内に点在。	資機材不足・夜間下での現場主導による応急対応・住民安全確保・情報共有・現場判断力の強化訓練。現場リーダーの判断・連携力、住民の安全対策徹底、住民不安への対応力向上を狙う。	資機材不足時の応急照明・誘導灯活用、夜間巡回・健康観察・住民安全指導、現場と本部・関係機関の情報共有・追加要請、住民不安・転倒リスク管理、応急手当マニュアルの再徹底。	現場班による手持ち照明・誘導灯の最大活用、住民の夜間移動制限や転倒防止策の徹底、健康観察・応急手当の継続、本部への追加資機材要請・状況報告、住民への安全指導・不安解消の声かけ、応急手当マニュアルの再確認・周知。	資機材不足による応急対応力の低下、暗闇下での転倒事故や健康観察の遅延、住民の不安・混乱拡大、追加資機材搬入の遅延、現場と本部間の情報伝達遅延、体調急変や事故への即応困難	道路は胸程度の冠水が継続、住宅街の多くで床上60cm前後の浸水、停電・通信障害・ガス漏洩疑い・感電事故が継続	床上浸水・停電・孤立・感電事故・ガス漏洩・体調不良者・避難所過密・臨時避難所運用・医療資源逼迫・資機材不足・夜間対応困難	床上浸水・停電・通信障害・感電事故・ガス漏洩疑いが継続し、複数世帯で高齢者や体調不良者が孤立。避難所・サテライト避難所ともに満員に近く、医療スタッフ・医薬品・搬送車両・照明機器の不足が深刻化。夜間対応・健康観察・資機材管理が重要課題。照明・発電機のバッテリー切れにより一部現場で応急対応や安全確保に支障が出ている。	サテライト避難所の迅速な運用、夜間巡回・健康観察体制の強化、医療スタッフ・資機材（照明・発電機等）の追加手配、現場・本部・避難所間の情報共有徹底、要配慮者名簿の活用と優先救助・搬送、住民への健康・安全指導の徹底、医療機関との連携強化、夜間対応マニュアルの徹底	平成25年台風18号時、同地区で床上浸水・孤立・停電・感電・ガス漏洩・体調不良者・避難所混乱・医療資源不足・照明不足が同時発生し、臨時避難所開設・医療応援要請が必要となった事例あり	['床上浸水拡大による住民の孤立', '停電・通信障害による情報収集・安否確認の遅れ', '感電・ガス漏洩等の二次災害による人身被害', '体調不良者の救助・搬送遅延', '避難所の過密・衛生悪化', '医療スタッフ・物資不足による健康被害拡大', '照明・発電機バッテリー切れによる夜間対応困難', '住民のパニック拡大']	['電気・ガス設備の浸水による火災・感電・爆発リスク', '交通遮断による救助活動の遅延', '下水道逆流による衛生被害', '避難所の受け入れ混乱', '感染症・生活環境悪化による体調不良者増加']
		1-36	0	発災179分後	照明・発電機等の資機材の長期的な枯渇状態が継続し、避難所・サテライト避難所の一部では引き続き暗闇下で最低限の健康観察・応急手当・夜間巡回を実施。住民の転倒や体調急変リスクが高まっており、現場班は夜間移動制限・応急手当マニュアルの再確認・安全指導の強化・住民不安への声かけを継続している。	現場班（避難誘導・医療・保健師）	『避難所・サテライト避難所で体調不良者や高齢者の健康観察、夜間巡回を続けているが、照明・発電機のバッテリー切れが長期化し、一部現場は暗闇で応急手当や巡回に支障が出ている。住民の転倒や体調急変リスクが高まっているため、夜間移動制限や安全指導、応急手当マニュアルの再確認を現場で徹底している』との現場班からの報告。	手持ちの懐中電灯や携帯照明を最大限活用中。追加資機材は依然として到着せず、住民の誘導や安全確保に現場で工夫が必要。転倒事故や体調急変時の連絡方法は現場で再周知済み。	淀川に隣接した標高の低い住宅密集地。南側が窪地で水が集中しやすく、短時間で複合災害（浸水・停電・感電・ガス漏洩など）が発生しやすい。古い住宅が多く、避難所も徒歩圏内に点在。	資機材不足・夜間下での現場主導による応急対応・住民安全確保・現場判断力の強化訓練。現場リーダーの判断・連携力、住民の安全対策徹底、住民不安への対応力向上を狙う。	資機材不足時の応急照明・誘導灯活用、夜間巡回・健康観察・住民安全指導、現場と本部・関係機関の情報共有・追加要請、住民不安・転倒リスク管理、応急手当マニュアルの再徹底。	現場班による手持ち照明・誘導灯の最大活用、住民の夜間移動制限や転倒防止策の徹底、健康観察・応急手当の継続、本部への追加資機材要請・状況報告、住民への安全指導・不安解消の声かけ、応急手当マニュアルの再確認・周知。	資機材不足による応急対応力の低下、暗闇下での転倒事故や健康観察の遅延、住民の不安・混乱拡大、追加資機材搬入の遅延、現場と本部間の情報伝達遅延、体調急変や事故への即応困難	道路は胸程度の冠水が継続、住宅街の多くで床上60cm前後の浸水、停電・通信障害・ガス漏洩疑い・感電事故が継続	床上浸水・停電・孤立・感電事故・ガス漏洩・体調不良者・避難所過密・臨時避難所運用・医療資源逼迫・資機材不足・夜間対応困難	床上浸水・停電・通信障害・感電事故・ガス漏洩疑いが継続し、複数世帯で高齢者や体調不良者が孤立。避難所・サテライト避難所ともに満員に近く、医療スタッフ・医薬品・搬送車両・照明機器の不足が深刻化。夜間対応・健康観察・資機材管理が重要課題。照明・発電機のバッテリー切れにより一部現場で応急対応や安全確保に支障が出ている。	サテライト避難所の迅速な運用、夜間巡回・健康観察体制の強化、医療スタッフ・資機材（照明・発電機等）の追加手配、現場・本部・避難所間の情報共有徹底、要配慮者名簿の活用と優先救助・搬送、住民への健康・安全指導の徹底、医療機関との連携強化、夜間対応マニュアルの徹底	平成25年台風18号時、同地区で床上浸水・孤立・停電・感電・ガス漏洩・体調不良者・避難所混乱・医療資源不足・照明不足が同時発生し、臨時避難所開設・医療応援要請が必要となった事例あり	['床上浸水拡大による住民の孤立', '停電・通信障害による情報収集・安否確認の遅れ', '感電・ガス漏洩等の二次災害による人身被害', '体調不良者の救助・搬送遅延', '避難所の過密・衛生悪化', '医療スタッフ・物資不足による健康被害拡大', '照明・発電機バッテリー切れによる夜間対応困難', '住民のパニック拡大']	['電気・ガス設備の浸水による火災・感電・爆発リスク', '交通遮断による救助活動の遅延', '下水道逆流による衛生被害', '避難所の受け入れ混乱', '感染症・生活環境悪化による体調不良者増加']
		1-37	0	発災182分後	照明・発電機のバッテリー切れが長期化し、一部避難所・サテライト避難所では引き続き暗闇下で最低限の健康観察・応急手当・夜間巡回を継続。住民の転倒や体調急変リスクが高まっており、現場では夜間移動制限と応急手当マニュアルの再確認、安全指導の強化が続行されている。	現場班（避難誘導・医療・保健師）	『避難所・サテライト避難所で体調不良者や高齢者の健康観察、夜間巡回を続けているが、照明・発電機のバッテリー切れが続き、一部現場は暗闇で応急手当や巡回に支障が出ている。住民の転倒や体調急変リスクが高まっているため、夜間移動制限や安全指導、応急手当マニュアルの再確認を現場で実施中』との報告。	手持ちの懐中電灯や携帯照明を最大限活用中。追加資機材は依然として到着しておらず、住民の誘導や安全確保に現場で工夫が必要。転倒事故や体調急変時の連絡方法は現場で再周知済み。	淀川に隣接した標高の低い住宅密集地。南側が窪地で水が集中しやすく、短時間で複合災害（浸水・停電・感電・ガス漏洩など）が発生しやすい。古い住宅が多く、避難所も徒歩圏内に点在。	資機材不足・夜間下での現場主導による応急対応・住民安全確保・情報共有・現場判断力の強化訓練。現場リーダーの判断・連携力、住民の安全対策徹底、住民不安への対応力向上を狙う。	資機材不足時の応急照明・誘導灯活用、夜間巡回・健康観察・住民安全指導、現場と本部・関係機関の情報共有・追加要請、住民不安・転倒リスク管理、応急手当マニュアルの再徹底。	現場班による手持ち照明・誘導灯の最大活用、住民の夜間移動制限や転倒防止策の徹底、健康観察・応急手当の継続、本部への追加資機材要請・状況報告、住民への安全指導・不安解消の声かけ、応急手当マニュアルの再確認・周知。	資機材不足による応急対応力の低下、暗闇下での転倒事故や健康観察の遅延、住民の不安・混乱拡大、追加資機材搬入の遅延、現場と本部間の情報伝達遅延、体調急変や事故への即応困難	道路は胸程度の冠水が継続、住宅街の多くで床上60cm前後の浸水、停電・通信障害・ガス漏洩疑い・感電事故が継続	床上浸水・停電・孤立・感電事故・ガス漏洩・体調不良者・避難所過密・臨時避難所運用・医療資源逼迫・資機材不足・夜間対応困難	床上浸水・停電・通信障害・感電事故・ガス漏洩疑いが継続し、複数世帯で高齢者や体調不良者が孤立。避難所・サテライト避難所ともに満員に近く、医療スタッフ・医薬品・搬送車両・照明機器の不足が深刻化。夜間対応・健康観察・資機材管理が重要課題。照明・発電機のバッテリー切れにより一部現場で応急対応や安全確保に支障が出ている。	サテライト避難所の迅速な運用、夜間巡回・健康観察体制の強化、医療スタッフ・資機材（照明・発電機等）の追加手配、現場・本部・避難所間の情報共有徹底、要配慮者名簿の活用と優先救助・搬送、住民への健康・安全指導の徹底、医療機関との連携強化、夜間対応マニュアルの徹底	平成25年台風18号時、同地区で床上浸水・孤立・停電・感電・ガス漏洩・体調不良者・避難所混乱・医療資源不足・照明不足が同時発生し、臨時避難所開設・医療応援要請が必要となった事例あり	['床上浸水拡大による住民の孤立', '停電・通信障害による情報収集・安否確認の遅れ', '感電・ガス漏洩等の二次災害による人身被害', '体調不良者の救助・搬送遅延', '避難所の過密・衛生悪化', '医療スタッフ・物資不足による健康被害拡大', '照明・発電機バッテリー切れによる夜間対応困難', '住民のパニック拡大']	['電気・ガス設備の浸水による火災・感電・爆発リスク', '交通遮断による救助活動の遅延', '下水道逆流による衛生被害', '避難所の受け入れ混乱', '感染症・生活環境悪化による体調不良者増加']

## Sheet: 枚方市楠葉並木一丁目25
評価	備考	シナリオID	(推測)災害の中心からの距離[m]	イベント発生時刻	付与内容	情報源	状況付与内容	補足情報	地形情報や想定想定される被害の特徴	訓練効果・狙い	判断ポイント	期待される対応行動	想定される課題	水位状況	被害の種類	詳細な被害状況	想定される対策	類似の過去事例(あれば記載)	直近のリスク	二次的なリスク
		1-2	350	発災5分後	住宅街の一部道路で冠水が始まり、側溝から水が溢れ出している	住民	自宅前の道路が浅く冠水し始め、側溝から水があふれている。車のタイヤ半分くらいまで水がきている。近所の一部住民が様子を見に出ているが、まだ避難はしていない。	消防にはまだ連絡していない。冠水箇所の正確な場所は不明だが、並木一丁目内の南側エリアとのこと。	淀川本流から約350mの低地に位置し、住宅密集地で標高差は小さい。周辺は都市型排水が多く、下水処理能力を超えると冠水しやすい。	初期段階での住民からの情報収集と、冠水拡大への警戒、避難判断基準の共有訓練。	住民からの冠水初期情報の把握、現場の状況確認班の派遣、冠水拡大時の避難誘導体制準備、側溝溢水による二次被害への注意。	通報内容の詳細聴取、現地状況の早期確認、住民への注意喚起、避難準備情報の提供、消防・警察への情報共有。	初期冠水の見逃し、住民の避難判断の遅れ、側溝からの溢水による道路陥没や転倒事故、情報伝達の遅延	道路でタイヤ半分程度の冠水、側溝からの溢水あり	軽度浸水・冠水	住宅街の道路で浅い冠水が始まり、側溝から水が溢れている。住宅への直接的な浸水は現時点で確認されていないが、今後の増水で浸水拡大の恐れ。	早期の住民注意喚起、側溝清掃・点検、現場確認班の派遣、避難準備情報の伝達、消防・警察との連携	平成25年台風18号時、同地域でも道路冠水と側溝溢水が発生し、通行困難となった事例あり。	['道路冠水による通行障害', '側溝溢水による転倒や車両事故']	['冠水拡大による住宅浸水', '下水逆流による衛生被害']
		1-3	350	発災9分後	住宅街の道路冠水が拡大し、歩道や一部住宅敷地内への浸水が始まっている	消防	消防隊が現場確認を行ったところ、並木一丁目25番地周辺で道路冠水が膝下程度まで拡大。歩道や住宅の敷地内にも水が入り始めており、一部住民が自宅前で土のうを積むなど対応している。現時点で住宅内への本格的な浸水は確認されていないが、今後の増水に警戒が必要との報告。	現場は住宅密集地で、道路沿いに排水口が複数あるが、既に一部は機能していない。消防は現地で住民への避難準備の呼びかけと、排水口の詰まり確認を実施中。	淀川本流から約350mの低地。住宅密集地で標高差は小さい。都市型排水が多く、下水処理能力を超えると冠水しやすい。南側はやや窪地となり、水が集まりやすい地形。	冠水拡大時の現場状況把握と、住民への避難準備・情報伝達、消防・行政の現場連携訓練。	消防による現地状況の詳細把握、住民への避難準備呼びかけ、排水機能の確認、冠水拡大時の迅速な初動体制の構築。	消防からの現場情報の受理、避難準備情報の再度伝達、排水口点検の応援要請、要配慮者リストの再確認、住民の安全確保、必要に応じて避難所開設準備。	排水機能の限界による冠水拡大、住民の避難判断遅延、要配慮者の所在確認遅れ、現場と本部間の情報共有不足	道路で膝下程度の冠水、歩道や一部住宅敷地内にも浸水開始	中度冠水・敷地内浸水	道路冠水が拡大し、歩道や一部住宅の敷地内へも浸水が始まっている。住宅内への本格的な浸水は現時点で確認されていないが、増水が続けば床下浸水の恐れあり。排水口の詰まりも発生し、排水機能が低下。	住民への避難準備呼びかけ、排水口・側溝の詰まり点検・清掃、消防・警察・行政の連携強化、要配慮者の所在確認と個別支援、土のう配布・設置支援	平成25年台風18号時、同地域で道路冠水と一部住宅敷地内浸水・排水口詰まりによる被害が発生した事例あり。	['道路冠水による通行障害', '歩道・敷地内への浸水拡大', '排水口詰まりによるさらなる水位上昇']	['住宅床下浸水による家財被害', '下水逆流による衛生被害', '要配慮者の避難遅延', '冠水拡大による孤立']
		1-4	350	発災12分後	住宅街の複数箇所で敷地内への浸水が拡大し、床下浸水が発生。要配慮者の避難支援要請が入る。	住民	並木一丁目25番地周辺の住民から、住宅敷地内の浸水がさらに拡大し、床下に水が入り始めているとの通報。高齢者世帯から避難支援の要請もあり、家の外へ出るのが難しい状況。	避難支援要請があったのは2世帯で、いずれも高齢者のみの世帯。道路の冠水で自力避難が困難。	淀川本流から約350mの低地。住宅密集地で標高差は小さい。南側にやや窪地があり水が集まりやすく、都市型排水の限界を超えると急速に浸水拡大。高齢者世帯も多い。	床下浸水・要配慮者発生時の安否確認・避難支援要請受理・現場対応指示の訓練。情報の優先順位付けと現場連携の強化を狙う。	要配慮者からの避難支援要請受理、現場への応援・支援班の派遣、床下浸水拡大時の迅速な状況把握と住民安全確保。	避難支援要請世帯のリストアップと現場への伝達、消防・警察・福祉部門との連携による支援班派遣、現場状況の継続把握、避難所受け入れ準備の加速、住民への避難情報再通知。	床下浸水拡大による家財被害、要配慮者の避難遅延、支援班の現場到着困難、複数世帯からの同時要請への対応遅延	道路は膝下～膝程度の冠水、複数住宅敷地内で床下5〜10cm浸水発生	床下浸水・要配慮者避難困難	道路・歩道の冠水がさらに拡大し、複数の住宅で床下浸水が発生。高齢者のみの世帯で自力避難が困難なケースが出ており、避難支援要請が入る。排水口の詰まり箇所も増加。	要配慮者名簿の再確認、避難支援班の迅速派遣、現場状況の逐次把握、排水口・側溝の詰まり解消作業、住民への避難情報再通知、消防・警察・福祉部門の連携強化	平成25年台風18号時、同地域で床下浸水と高齢者避難困難事例あり。避難支援要請が集中し対応が遅れた事例も報告されている。	['床下浸水拡大による家財被害', '要配慮者の避難遅延', '道路冠水による通行障害']	['冠水拡大による孤立世帯の発生', '下水逆流による衛生被害', '支援班の現場到着遅延']
		1-5	350	発災17分後	床下浸水が拡大し、複数住宅で電気設備への浸水が懸念される。追加の避難支援要請が入る。	消防	消防隊より、並木一丁目25番地周辺で床下浸水がさらに拡大し、複数住宅で分電盤や電気設備の近くまで水が到達。追加で高齢者世帯1件から避難支援要請あり。現場は膝程度の冠水で車両進入が困難な状況。	避難支援要請は新たに1世帯（高齢者単身）。現場は既に床下10cm以上の浸水。消防は徒歩での接近を継続中。	淀川本流から約350mの低地で、住宅密集地。道路・歩道は窪地状で水が集まりやすく、都市型排水能力を超えると急速に浸水拡大。高齢者世帯が多い。	床下浸水拡大時の電気設備リスク把握と避難支援要請への迅速対応、現場・本部間の情報共有・連携強化訓練。	電気設備への浸水リスク把握、追加の避難支援要請への優先対応、現場応援体制の再確認、住民・要配慮者の安全確保。	新たな避難支援世帯のリストアップ・現場伝達、電気設備リスクの住民周知、消防・福祉部門との連携で応援班派遣、避難所受け入れ体制の再確認。	床下浸水による感電・火災リスク、複数支援要請への同時対応、車両進入困難による現場到着遅延、情報伝達の遅れ	道路は膝程度の冠水、複数住宅で床下10cm超の浸水、電気設備付近まで水位上昇	床下浸水拡大・電気設備リスク・追加避難困難	床下浸水が10cm以上となり、複数住宅で分電盤や電気設備の近くまで水位が上昇。追加で高齢者世帯から避難支援要請。車両での接近が困難となり、徒歩での対応を強いられる。	電気ブレーカーの早期遮断指導、避難支援班の迅速派遣、住民への感電・火災リスクの注意喚起、消防・警察・福祉部門の連携強化、現場状況の随時把握	平成25年台風18号時、同地域で床下浸水から電気設備被害・感電事故寸前の事例あり。避難支援要請が集中し対応が遅れた事例も報告されている。	['床下浸水拡大による家財・電気設備被害', '感電・火災リスク', '要配慮者の避難遅延']	['冠水拡大による孤立世帯の発生', '下水逆流による衛生被害', '支援班の現場到着遅延']
		1-6	350	発災24分後	床下浸水が継続し、住宅の一部でガス設備や給湯器への浸水が確認され始めた。避難支援要請世帯の安否確認が遅れ、現場では連絡の取れない高齢者世帯が発生。	消防	消防隊より、並木一丁目25番地周辺で床下浸水が継続する中、住宅の外部ガス設備や給湯器の一部が水没。先ほど避難支援要請があった高齢者世帯のうち1件と連絡が取れなくなっているとの報告。現場は依然として膝程度の冠水が続き、徒歩での救助活動を継続中。	ガス会社には状況連絡済み。連絡が取れない世帯は高齢者単身。現場は水位が高く、住宅周囲の確認に時間を要している。	淀川本流から約350mの低地。住宅密集地で標高差は小さく、窪地状で水が集まりやすい。都市型排水能力を超えると浸水が長期化しやすい。高齢者世帯が多い。	床下浸水が長期化した際のガス設備リスク・連絡不能世帯対応・現場安否確認の優先順位付け・関係機関連携の強化訓練。	ガス設備・給湯器の浸水リスク把握、連絡不能世帯への現場確認・救助指示、消防・ガス会社・福祉部門の連携強化、住民・要配慮者の安全確保。	ガス設備の遮断指示とガス会社への情報共有、連絡不能世帯のリストアップと現場確認班の派遣、関係機関との応援要請、住民への追加注意喚起と避難再通知、避難所受け入れ体制の再確認。	ガス・給湯器からの漏洩や火災リスク、連絡不能世帯の安否確認遅延、徒歩救助による活動範囲・時間の制約、複数機関間の情報共有遅延	道路は膝程度の冠水が継続、床下10〜15cmの浸水、屋外ガス設備・給湯器の一部が水没	床下浸水長期化・ガス設備リスク・安否不明世帯発生	床下浸水が継続し、住宅外部のガス設備や給湯器の一部が水没。避難支援要請世帯の中で1件と連絡が取れなくなり、現場での安否確認が急務。ガス漏洩や火災リスクが増大し、救助活動は徒歩中心で進行中。	ガス設備の早期遮断・ガス会社連絡、安否不明世帯のリストアップと現場確認班派遣、住民への感電・ガス漏洩・火災リスクの注意喚起、関係機関との連携強化、現場状況の逐次把握	平成25年台風18号時、同地域で床下浸水長期化によるガス設備被害・安否不明高齢者世帯発生の事例あり。ガス漏洩事故寸前の報告もあった。	['床下浸水継続による家財・ガス設備・給湯器被害', 'ガス漏洩・火災・感電リスク', '安否不明世帯の救助遅延']	['冠水長期化による孤立世帯の発生', '下水逆流による衛生被害', '支援班・救助班の現場到着遅延']
		1-7	350	発災29分後	床下浸水が継続し、現場では下水の逆流や悪臭の発生が確認され、住民から衛生面への不安の声が上がっている。	住民	並木一丁目25番地周辺の住民から『床下の水が引かず、トイレや排水口から水が逆流してきている。悪臭もしているので、どうすればいいか』との相談が自治体窓口に入る。	現場は依然として道路に膝程度の冠水が残り、床下浸水も10〜15cm程度継続。住民の多くは自宅2階や高所で待機中。消防・ガス会社には先行して連絡済み。	淀川本流から約350mの低地。住宅密集地で標高差は小さく、南側窪地に水が集まりやすい。都市型排水能力を超えると排水不良・逆流が起こりやすい。	浸水長期化時の衛生被害（二次災害）対応、住民への衛生指導・生活支援、現場・本部間の情報共有・多機関連携の実践訓練。	下水逆流・悪臭発生時の住民対応、衛生リスクへの早期注意喚起、生活支援物資の調達・配布準備、関係機関との連携強化。	住民への衛生被害防止策（手洗い・飲用水確保等）の周知、下水道管理部門への連絡、現場状況の継続把握、必要に応じて消毒・生活支援物資（飲料水・簡易トイレ等）の手配、避難所での受け入れ体制準備。	下水逆流による衛生被害拡大、住民の健康被害（感染症等）、生活物資の調達・配布遅延、複数機関間の情報共有の遅れ	道路は膝程度の冠水継続、床下10〜15cmの浸水、下水逆流発生・悪臭あり	床下浸水長期化・下水逆流・衛生被害懸念	床下浸水が継続する中、下水道や排水口からの逆流・悪臭が発生し、住民から衛生面の不安が高まっている。自宅内での生活環境悪化・健康被害リスクが顕在化しつつある。	住民への衛生指導（手洗い・飲用水管理）、下水道管理部門との連携、簡易トイレ・飲料水等の生活支援物資の手配・配布、現場状況の継続把握と情報共有、避難所での衛生管理体制強化	平成25年台風18号時、同地域で床下浸水長期化による下水逆流・悪臭・感染症リスクが発生した事例あり。生活物資の配布遅延が住民の不安拡大につながった。	['床下浸水継続による家財・ガス設備・給湯器被害', 'ガス漏洩・火災・感電リスク', '安否不明世帯の救助遅延', '下水逆流による衛生被害・健康被害']	['冠水長期化による孤立世帯の発生', '感染症・生活環境悪化による体調不良者発生', '支援班・救助班の現場到着遅延']
		1-8	350	発災31分後	床下浸水および下水逆流・悪臭発生が継続する中、住民から飲料水や簡易トイレなど生活支援物資の要請が自治体窓口に複数件入る。	住民	並木一丁目25番地周辺の住民から『床下の水が引かず、トイレや排水口の逆流・悪臭も続いている。飲み水やトイレの備えが心配なので、支援物資を届けてほしい』との要請が複数寄せられている。	現場は依然として道路に膝程度の冠水が残り、床下浸水も10〜15cm程度継続。住民の多くは2階や高所で待機。消防・下水道管理部門には先行して連絡済み。要配慮者世帯も物資要請に含まれている。	淀川本流から約350mの低地。住宅密集地で標高差は小さく、南側窪地に水が集まりやすい。都市型排水能力を超えると排水不良・逆流が起こりやすい。高齢者世帯も多い。	長期化する浸水・下水逆流時の生活支援物資のニーズ把握と、支援物資調達・配布体制の迅速な構築、現場・本部間および関係機関連携の実践訓練。	住民からの生活支援物資要請の受理・優先度判断、物資調達・配布ルートの確保、要配慮者世帯への個別対応、現場状況の継続把握と迅速な情報共有。	住民からの要請内容の詳細聴取、物資（飲料水・簡易トイレ等）の調達・搬送指示、要配慮者世帯リストとの突合・優先配布、消防・福祉・保健部門との連携、現場状況の継続的な把握・本部への即時報告。	物資調達・搬送の遅延、冠水による配布困難、要配慮者世帯への個別対応の遅れ、複数機関間の情報伝達の混乱、住民の不安拡大	道路は膝程度の冠水継続、床下10〜15cmの浸水、下水逆流・悪臭あり	床下浸水長期化・下水逆流・生活支援物資不足	床下浸水と下水逆流・悪臭が継続する中、住民から飲料水や簡易トイレなどの生活支援物資要請が複数発生。要配慮者世帯も含まれ、現場では物資不足・生活環境悪化への不安が拡大している。	生活支援物資（飲料水・簡易トイレ等）の迅速な調達・配布、要配慮者世帯への個別支援、下水道管理部門との連携強化、現場状況の逐次把握、避難所の衛生管理体制強化、住民への衛生指導	平成25年台風18号時、同地域で床下浸水長期化・下水逆流・生活物資不足が発生し、物資配布遅延が住民の不安拡大につながった事例あり。	['床下浸水継続による家財・ガス設備・給湯器被害', '下水逆流による衛生被害・健康被害', '生活物資不足による住民の体調不良・不安拡大']	['冠水長期化による孤立世帯の発生', '感染症・生活環境悪化による体調不良者発生', '支援班・救助班の現場到着遅延']
		1-9	350	発災38分後	床下浸水・下水逆流・生活支援物資不足が継続する中、現場で一部住民の体調不良（軽度のめまいや吐き気）が報告され、保健師の派遣要請が自治体窓口に入る。	住民	並木一丁目25番地周辺の住民から『床下の水が引かず、悪臭や下水逆流の影響で家族がめまいや吐き気を訴えている。医療的な助けが必要かもしれないので、保健師や救急の方に確認に来てほしい』との要請が入った。	体調不良を訴えているのは高齢者と子どもを含む2世帯。現場は依然として道路に膝程度の冠水、床下10〜15cmの浸水が続き、悪臭も強い。消防・下水道管理部門・福祉部門には先行して連絡済み。	淀川本流から約350mの低地。住宅密集地で標高差が小さく、南側窪地に水が集まりやすい。都市型排水能力を超えた状態で、下水逆流や衛生被害が長期化しやすい。	長期化する浸水・下水逆流による衛生被害・体調不良発生時の医療・保健部門との連携、住民健康被害対応の初動訓練。	住民からの健康被害申告の受理、保健師・医療班の迅速な派遣判断、現場での健康状態確認・応急対応、要配慮者世帯への優先対応、関係機関連携の強化。	体調不良世帯のリストアップと現場への伝達、保健師・医療班の派遣指示、住民への衛生指導・健康被害防止策の再周知、消防・福祉・下水道管理部門との連携、現場状況の継続把握・本部への即時報告。	保健師・医療班の現場到着遅延、冠水によるアクセス困難、健康被害の見逃しや重症化、複数機関間の情報共有の遅れ、住民の不安拡大	道路は膝程度の冠水継続、床下10〜15cmの浸水、下水逆流・悪臭あり	床下浸水長期化・下水逆流・生活支援物資不足・健康被害発生	床下浸水と下水逆流・悪臭が継続し、住民の一部でめまいや吐き気などの体調不良が発生。高齢者や子どもを含む世帯から医療的支援要請が入り、現場では生活環境悪化と健康被害リスクが顕在化している。	生活支援物資（飲料水・簡易トイレ等）の迅速な配布、保健師・医療班の派遣、住民への衛生・健康指導、下水道管理部門との連携強化、現場状況の逐次把握・情報共有、避難所の衛生管理体制強化	平成25年台風18号時、同地域で床下浸水長期化・下水逆流・生活物資不足・健康被害が発生し、医療班の派遣が遅れた事例あり。	['床下浸水継続による家財・ガス設備・給湯器被害', '下水逆流による衛生被害・健康被害（体調不良者発生）', '生活物資不足による住民の体調不良・不安拡大']	['冠水長期化による孤立世帯の発生', '感染症・生活環境悪化による体調不良者増加', '支援班・救助班・医療班の現場到着遅延']
		1-10	350	発災41分後	床下浸水・下水逆流・生活支援物資不足・住民体調不良が継続する中、一部住民の健康悪化（発熱・嘔吐）が報告され、救急搬送の要請が自治体窓口に入る。	住民	並木一丁目25番地周辺の住民から『体調不良だった高齢の家族が発熱し嘔吐も始まった。自力での移動が難しいので救急車を呼びたいが、道路が冠水しているため対応を相談したい』との連絡が入った。	体調悪化を訴えているのは高齢者世帯1件。現場は膝程度の冠水、床下10〜15cmの浸水と悪臭が継続。消防・保健師・福祉部門には先行して連絡済みで、救急車両の進入は困難な状況。	淀川本流から約350mの低地。住宅密集地で標高差が小さく、南側窪地に水が集まりやすい。都市型排水能力を超えた状態が長期化し、衛生・健康被害が拡大しやすい。	長期化する浸水・下水逆流による健康被害重症化時の救急搬送体制の確認、関係機関（消防・保健・福祉）連携による応急対応訓練。	救急搬送困難時の現場対応判断、徒歩やボートによる救助・搬送ルートの確保、健康被害重症化への優先対応、関係機関連携の強化。	体調悪化世帯のリストアップと現場への伝達、救急隊との連携による搬送ルート・手段の検討、現場応急対応班の派遣（徒歩・ボート等）、住民・要配慮者への健康被害再注意喚起、消防・保健・福祉部門との情報共有。	救急車両の進入困難による搬送遅延、重症化リスクの高い住民の見逃し、徒歩・ボート搬送時の安全確保、関係機関間の連携・情報共有遅延、住民の不安拡大	道路は膝程度の冠水継続、床下10〜15cmの浸水、下水逆流・悪臭あり	床下浸水長期化・下水逆流・生活支援物資不足・健康被害重症化・救急搬送困難	床下浸水と下水逆流・悪臭が継続する中、高齢者世帯で発熱・嘔吐などの健康被害が重症化。冠水による救急車両の進入困難が発生し、徒歩やボートによる応急対応・搬送手段の検討が必要となっている。	救急車両進入困難時の徒歩・ボート搬送体制の事前整備、保健師・消防・福祉部門の現場連携強化、住民への健康被害・衛生指導の再徹底、物資配布・避難所体制の強化、現場状況の逐次把握と情報共有	平成25年台風18号時、同地域で床下浸水・下水逆流長期化による高齢者の健康被害重症化・救急搬送困難事例あり。徒歩やボートによる救助・搬送が必要となったケースが報告されている。	['床下浸水継続による家財・ガス設備・給湯器被害', '下水逆流による衛生被害・健康被害（体調不良者発生）', '生活物資不足による住民の体調不良・不安拡大', '救急搬送困難による重症化リスク']	['冠水長期化による孤立世帯の発生', '感染症・生活環境悪化による体調不良者増加', '支援班・救助班・医療班・救急隊の現場到着遅延']
		1-11	350	発災46分後	床下浸水・下水逆流・生活支援物資不足・健康被害重症化・救急搬送困難が継続する中、現場応急対応班・救急隊・保健師・福祉部門が連携し、徒歩・ボートによる救急搬送支援を実施。追加で要配慮者世帯から避難所への搬送希望が入り、搬送ルート・手段の再調整が必要となる。	消防	現場活動中の消防隊から『先ほど健康悪化を訴えていた高齢者世帯の救急搬送を徒歩・ボートで実施中。あわせて、近隣の要配慮者世帯からも避難所への搬送希望が追加で入った。道路の冠水が続いているため、搬送ルートの再調整と応援要請をしたい』との報告。	追加搬送希望は高齢者世帯2件。現場は依然として膝程度の冠水、床下10〜15cmの浸水と悪臭が継続。消防・保健師・福祉部門は現場で連携中。搬送には徒歩・ボートを併用している。	淀川本流から約350mの低地。住宅密集地で標高差が小さく、南側窪地に水が集まりやすい。都市型排水能力を超えた状態が長期化し、衛生・健康被害が拡大しやすい。高齢者世帯が多い。	長期化する浸水・下水逆流・健康被害重症化時の多機関連携による搬送支援体制の実践訓練、搬送ルート・手段の臨機応変な調整、現場と本部間の情報共有強化を狙う。	救急搬送困難時の現場対応判断、徒歩・ボートによる搬送ルートの再調整、要配慮者世帯への優先対応、関係機関連携・情報共有の徹底。	追加搬送希望世帯のリストアップと現場への伝達、搬送ルート・手段の再検討、消防・保健師・福祉部門の連携による応援班派遣、避難所での受け入れ体制再確認、住民・要配慮者への健康被害再注意喚起、現場状況の即時報告。	搬送希望の増加による対応遅延、徒歩・ボート搬送時の安全確保、要配慮者の個別対応の遅れ、複数機関間の調整・情報共有の混乱、住民の不安拡大	道路は膝程度の冠水継続、床下10〜15cmの浸水、下水逆流・悪臭あり	床下浸水長期化・下水逆流・生活支援物資不足・健康被害重症化・救急搬送困難・追加搬送希望	床下浸水と下水逆流・悪臭が継続する中、高齢者世帯で健康被害が重症化。徒歩・ボートによる救急搬送が行われているが、追加で要配慮者世帯から避難所への搬送希望が入り、現場で搬送ルート・手段の再調整が必要となっている。現場は冠水・浸水・悪臭が継続し、住民の不安と健康被害リスクがさらに高まっている。	徒歩・ボート搬送体制の強化、保健師・消防・福祉部門の現場連携・応援体制の再確認、住民への健康被害・衛生指導の再徹底、物資配布・避難所体制の強化、現場状況の逐次把握と情報共有	平成25年台風18号時、同地域で床下浸水・下水逆流長期化による高齢者の健康被害重症化・救急搬送困難・追加搬送希望事例あり。徒歩やボートによる救助・搬送が必要となったケースが報告されている。	['床下浸水継続による家財・ガス設備・給湯器被害', '下水逆流による衛生被害・健康被害（体調不良者発生）', '生活物資不足による住民の体調不良・不安拡大', '救急搬送困難による重症化リスク', '搬送希望者の増加による対応遅延']	['冠水長期化による孤立世帯の発生', '感染症・生活環境悪化による体調不良者増加', '支援班・救助班・医療班・救急隊の現場到着遅延']
		1-12	350	発災54分後	現場では床下浸水・下水逆流・悪臭・健康被害・搬送困難が継続する中、避難所の受け入れ余力が限界に近づき、追加の避難希望者・体調不良者対応のため、臨時の待機所（サテライト避難所）開設検討の指示が本部から出される。	行政（本部）	本部より『並木一丁目25番地周辺の避難希望・体調不良者搬送が続く中、既存避難所の受け入れがほぼ満員となった。追加の避難希望者や健康悪化者の一時待機場所として、近隣公共施設等を臨時避難所（サテライト避難所）として開設する準備を進めてほしい』との指示。	既存避難所は高齢者・体調不良者で満杯。現場は膝程度の冠水、床下10〜15cmの浸水、下水逆流・悪臭が継続。サテライト避難所候補は町内会館や小学校体育館など。	淀川本流から約350mの低地。住宅密集地で標高差が小さく、南側窪地に水が集まりやすい。都市型排水能力を超えた状態が長期化し、衛生・健康被害が拡大しやすい。高齢者世帯が多い。	避難所過密・健康被害拡大時の臨時避難所開設判断・現場運用・住民誘導の実践訓練。多機関連携と情報共有の強化を狙う。	避難所過密時の臨時避難所設置判断、現場・本部・関係機関の調整、住民・要配慮者の安全確保、避難誘導・物資搬送・衛生管理体制の迅速構築。	サテライト避難所候補の現地確認・開設指示、避難誘導班・物資搬送班の編成と派遣、現場本部・既存避難所・関係機関（消防・警察・保健・福祉・ボランティア）との連携、住民・要配慮者リストの再整理と優先搬送、衛生・健康管理体制の確立、住民への広報・安全指導。	避難所過密による受け入れ遅延、臨時避難所開設準備の遅れ、物資・人員不足、住民の不安・混乱拡大、現場・本部間の情報伝達遅延、複数機関連携の混乱	道路は膝程度の冠水継続、床下10〜15cmの浸水、下水逆流・悪臭あり	床下浸水長期化・下水逆流・健康被害拡大・避難所過密・臨時避難所開設指示	床下浸水と下水逆流・悪臭が継続し、住民の一部で健康被害が拡大。既存避難所は満員となり、追加の避難希望・体調不良者対応のため、臨時避難所開設の判断・準備が必要となっている。現場は冠水・浸水・悪臭が継続し、住民の不安と健康リスクがさらに高まっている。	サテライト避難所の迅速な開設・運用、避難誘導・物資搬送班の強化、現場本部・既存避難所・関係機関との連携、要配慮者名簿の活用と優先救助・搬送、衛生・健康管理体制の確立、現場・本部間の情報共有徹底、住民への広報・安全指導の徹底	平成25年台風18号時、同地域で床下浸水・避難所過密・臨時避難所開設が必要となった事例あり。物資・人員不足や情報共有遅延による混乱が生じた。	['床下浸水継続による家財・ガス設備・給湯器被害', '下水逆流による衛生被害・健康被害（体調不良者発生）', '生活物資不足による住民の体調不良・不安拡大', '救急搬送困難による重症化リスク', '避難所過密・受け入れ遅延']	['冠水長期化による孤立世帯の発生', '感染症・生活環境悪化による体調不良者増加', '支援班・救助班・医療班・救急隊の現場到着遅延', '臨時避難所開設準備の遅れ・混乱']
		1-13	350	発災58分後	サテライト避難所の開設準備が進む中、避難誘導班・物資搬送班・保健師班が現場に派遣され、既存避難所・臨時避難所間の住民搬送・健康管理・物資配布体制の構築が本格化する。	現場班（避難誘導・物資搬送・保健師）	並木一丁目25番地周辺では、サテライト避難所の開設準備が進行中。避難誘導班・物資搬送班・保健師班が現場に到着し、既存避難所・臨時避難所間で住民搬送や健康状態のチェック、物資配布（飲料水・簡易トイレ・衛生資材等）を開始。要配慮者や体調不良者のリストアップと優先搬送も同時進行中。	既存避難所は満杯で、サテライト避難所（町内会館・学校体育館等）への搬送が本格化。搬送には徒歩・ボートを併用。保健師は健康相談・感染症予防指導も担当。現場と本部・避難所間の情報共有は無線・携帯で実施。	淀川本流から約350mの低地。住宅密集地で標高差が小さく、南側窪地に水が集まりやすい。都市型排水能力を超えた状態が長期化し、衛生・健康被害が拡大しやすい。高齢者世帯が多い。	臨時避難所運用下での多機関連携による避難誘導・物資搬送・健康管理体制の構築訓練。住民安全確保・衛生管理・優先順位判断・情報共有の強化を狙う。	避難所・サテライト避難所間の搬送・物資配布・健康管理の現場オペレーション、要配慮者・体調不良者の優先対応、複数部門連携の実践、現場と本部・避難所間の情報共有迅速化。	避難誘導・搬送班の現場展開、要配慮者・体調不良者リストの再整理・優先搬送、物資（飲料水・トイレ・衛生資材等）のサテライト避難所搬送・配布、保健師による健康チェック・感染症予防指導、現場と本部・避難所間の情報共有体制強化。	搬送・物資配布の遅延、搬送希望者の増加による現場混乱、要配慮者・体調不良者の個別対応の遅れ、複数機関間の調整・情報伝達の混乱、住民の不安拡大、夜間対応や停電時の活動困難	道路は膝程度の冠水継続、床下10〜15cmの浸水、下水逆流・悪臭あり	床下浸水長期化・下水逆流・健康被害拡大・避難所過密・臨時避難所運用・多機関連携搬送・物資配布	床下浸水と下水逆流・悪臭が継続し、住民の一部で健康被害が拡大。既存避難所は満員、サテライト避難所への搬送・物資配布・健康管理が本格化。複数部門（避難誘導・物資搬送・保健師）が連携し、住民安全確保・衛生管理・優先搬送に取り組む現場運用が進む。	サテライト避難所の迅速な運用、避難誘導・物資搬送・健康管理班の現場展開・連携、要配慮者名簿の活用と優先救助・搬送、衛生・健康管理体制の確立、現場・本部・避難所間の情報共有徹底、住民への広報・安全指導の徹底	平成25年台風18号時、同地域で床下浸水・避難所過密・臨時避難所開設・多機関連携搬送・物資配布が必要となった事例あり。物資・人員不足や情報共有遅延による混乱が生じた。	['床下浸水継続による家財・ガス設備・給湯器被害', '下水逆流による衛生被害・健康被害（体調不良者発生）', '生活物資不足による住民の体調不良・不安拡大', '救急搬送困難による重症化リスク', '避難所過密・受け入れ遅延']	['冠水長期化による孤立世帯の発生', '感染症・生活環境悪化による体調不良者増加', '支援班・救助班・医療班・救急隊の現場到着遅延', '臨時避難所運用・物資配布の遅延・混乱']
		1-14	350	発災61分後	サテライト避難所の本格稼働に伴い、既存避難所・臨時避難所間での高齢者や体調不良者の優先搬送、医療物資の再配分調整が必要となる。	現場班（避難誘導・物資搬送・保健師）	並木一丁目25番地周辺のサテライト避難所・既存避難所の双方で、体調不良者や高齢者の増加に伴い、解熱剤や消毒液、簡易ベッドなどの医療物資が不足し始めたとの現場報告。避難所間での物資再配分と、体調不良者の優先搬送・健康チェックが求められている。	避難所間の連絡は無線と携帯を併用。既存避難所・サテライト避難所ともに収容数が限界に近く、今後も追加搬送希望者が見込まれる。保健師は健康相談・感染症予防指導も担当。	淀川本流から約350mの低地。住宅密集地で標高差が小さく、南側窪地に水が集まりやすい。都市型排水能力を超えた状態が長期化し、衛生・健康被害が拡大しやすい。高齢者世帯が多い。	複数避難所運用下での医療・物資・人員配分の現場調整、多機関連携による健康被害抑制・優先順位判断・情報共有の実践力向上を狙う。	避難所間の物資・人員調整、体調不良者・高齢者の優先搬送・健康管理、現場班・本部・医療機関との情報共有・連携強化、住民安全確保・衛生維持。	医療物資・衛生資材の優先搬送、体調不良者・高齢者リストの再整理と優先搬送、保健師・医療スタッフの現場展開、避難所間・本部との情報共有、住民健康状態の把握・健康相談体制強化、関係機関（保健・福祉・医療・ボランティア）との連携調整。	医療物資・スタッフ不足、避難所間搬送・調整の遅延、健康被害拡大への即応困難、住民不安・混乱拡大、夜間・停電下での応急対応困難、複数機関連携の調整遅延	道路は膝程度の冠水継続、床下10〜15cmの浸水、下水逆流・悪臭あり	床下浸水長期化・下水逆流・健康被害拡大・避難所過密・臨時避難所運用・医療資源逼迫	床下浸水と下水逆流・悪臭が継続し、住民の一部で健康被害が拡大。既存避難所・サテライト避難所ともに満員に近く、医療スタッフ・医薬品の不足が深刻化。高齢者や体調不良者の優先搬送・健康管理、避難所間での医療物資再配分調整が必要となり、現場対応が逼迫している。	サテライト避難所の迅速な運用、避難誘導・物資搬送・健康管理班の現場展開強化、要配慮者名簿の活用と優先救助・搬送、衛生・健康管理体制の確立、現場・本部・避難所間の情報共有徹底、住民への広報・安全指導の徹底、医療機関との連携強化	平成25年台風18号時、同地域で床下浸水・避難所過密・臨時避難所開設・医療応援要請が必要となった事例あり。物資・人員不足や情報共有遅延による混乱が生じた。	['床下浸水継続による家財・ガス設備・給湯器被害', '下水逆流による衛生被害・健康被害（体調不良者発生）', '生活物資不足による住民の体調不良・不安拡大', '救急搬送困難による重症化リスク', '避難所過密・受け入れ遅延', '医療資源逼迫による健康被害拡大']	['冠水長期化による孤立世帯の発生', '感染症・生活環境悪化による体調不良者増加', '支援班・救助班・医療班・救急隊の現場到着遅延', '臨時避難所運用・物資配布の遅延・混乱']
		1-15	350	発災66分後	既存避難所・サテライト避難所ともに収容人数が限界に達しつつあり、避難誘導や物資の搬送が現場で滞留し始めている。高齢者や体調不良者の待機が発生し、現場班からは追加の人員・物資搬送車両の派遣要請が本部へ送られる。	現場班（避難誘導・物資搬送）	並木一丁目25番地周辺で、避難誘導班・物資搬送班から『避難所とサテライト避難所ともに満員状態。新たな避難希望者や体調不良者が一時的に現場で待機している。搬送用人員や車両が不足しており、追加派遣を至急要請したい』との連絡が入った。	待機者は高齢者・体調不良者を中心に6名程度。現場は膝程度の冠水、床下10〜15cmの浸水、悪臭・下水逆流も継続。夜間対応のため照明・電源も不足気味。	淀川本流から約350mの低地。住宅密集地で標高差が小さく、南側の窪地に水が集まりやすい。都市型排水能力を超えた状態が長期化しており、避難所も徒歩圏内で分散している。	避難所・臨時避難所の過密化に伴う現場での一時待機者対応、追加人員・物資搬送体制の迅速構築、夜間・停電時の現場対応力向上訓練。	避難所過密時の現場待機者発生への初動対応、追加搬送・誘導体制の確保、夜間・停電下での安全管理、情報共有と多機関連携の強化。	現場待機者リストの作成・本部への即時報告、追加人員・搬送車両の手配指示、現場での安全確保（照明・仮設テント等）、住民・要配慮者の健康状態確認、避難所間・本部との情報共有体制強化。	搬送希望者の増加による対応遅延、夜間・停電下での安全確保困難、現場待機者の健康・安全管理、複数機関間の調整・情報伝達の混乱、住民不安の拡大	道路は膝程度の冠水継続、床下10〜15cmの浸水、下水逆流・悪臭あり	床下浸水長期化・下水逆流・健康被害拡大・避難所過密・現場待機者発生・搬送体制逼迫	床下浸水と下水逆流・悪臭が継続し、避難所・サテライト避難所ともに満員状態。新たな避難希望者や体調不良者が現場で一時待機となり、搬送用人員・車両の不足が顕在化。夜間対応・照明不足も課題となっている。	追加搬送人員・車両の迅速手配、現場待機者の安全確保（照明・仮設テント等）、避難所間・本部との情報共有徹底、要配慮者名簿の活用と優先搬送、現場での健康・衛生管理体制強化、夜間対応マニュアルの徹底	平成25年台風18号時、同地域で避難所過密・現場待機者発生・搬送体制遅延・夜間対応困難が報告された。照明・車両不足による混乱や健康被害拡大が課題となった。	['床下浸水継続による家財・ガス設備・給湯器被害', '下水逆流による衛生被害・健康被害（体調不良者発生）', '生活物資不足による住民の体調不良・不安拡大', '救急搬送困難による重症化リスク', '避難所過密・受け入れ遅延', '医療資源逼迫による健康被害拡大', '現場待機者の健康・安全リスク']	['冠水長期化による孤立世帯の発生', '感染症・生活環境悪化による体調不良者増加', '支援班・救助班・医療班・救急隊の現場到着遅延', '臨時避難所運用・物資配布の遅延・混乱', '夜間・停電下での現場対応困難']
		1-16	350	発災74分後	避難所・サテライト避難所とも満員状態が続く中、現場での待機者の健康・安全管理と夜間の仮設照明設置、追加搬送体制の再調整が進められている。	現場班（避難誘導・物資搬送）	並木一丁目25番地周辺の現場班から『避難所・サテライト避難所は依然として満員。現場で待機中の高齢者や体調不良者の健康状態を確認しつつ、夜間の安全確保のため仮設照明の設置を進めている。追加搬送体制の再調整も進行中』との報告。	現場待機者は高齢者・体調不良者を中心に数名。夜間に備えた照明・仮設テント設置が進行中。追加搬送車両・人員の手配も継続要請している。	淀川本流から約350mの低地。住宅密集地で標高差が小さく、南側の窪地に水が集まりやすい。都市型排水能力を超えた状態が長期化し、避難所も徒歩圏内で分散している。	避難所過密・現場待機者発生時の健康・安全管理、夜間対応力の強化、追加搬送体制の調整・現場運用力向上訓練。	現場待機者の健康チェック・安全確保、夜間照明設置、搬送体制の再調整・迅速な情報共有、夜間対応マニュアルの実践。	現場待機者の健康状態・安否の継続確認、夜間照明・仮設テントの設置、追加搬送体制の再調整・本部との連絡、住民・要配慮者の安全指導、現場・本部・避難所間の連携強化。	夜間・停電下での安全確保困難、現場待機者の健康悪化リスク、搬送希望者の増加による対応遅延、複数機関間の情報伝達混乱、住民不安の拡大	道路は膝程度の冠水継続、床下10〜15cmの浸水、下水逆流・悪臭あり	床下浸水長期化・下水逆流・健康被害拡大・避難所過密・現場待機者発生・夜間対応	床下浸水と下水逆流・悪臭が継続し、避難所・サテライト避難所ともに満員状態。現場での待機者（高齢者・体調不良者）の健康・安全管理が課題となり、夜間の照明設置や仮設テント設営、追加搬送体制の再調整が進められている。	夜間照明・仮設テント等の迅速設置、現場待機者の健康・安全管理体制強化、追加搬送人員・車両の手配、情報共有体制の強化、要配慮者名簿の活用と優先搬送、夜間対応マニュアルの徹底	平成25年台風18号時、同地域で避難所過密・現場待機者発生・夜間対応困難・照明不足による混乱や健康被害拡大が報告された。	['床下浸水継続による家財・ガス設備・給湯器被害', '下水逆流による衛生被害・健康被害（体調不良者発生）', '生活物資不足による住民の体調不良・不安拡大', '救急搬送困難による重症化リスク', '避難所過密・受け入れ遅延', '医療資源逼迫による健康被害拡大', '現場待機者の健康・安全リスク']	['冠水長期化による孤立世帯の発生', '感染症・生活環境悪化による体調不良者増加', '支援班・救助班・医療班・救急隊の現場到着遅延', '臨時避難所運用・物資配布の遅延・混乱', '夜間・停電下での現場対応困難']
		1-17	350	発災76分後	現場の待機者（高齢者・体調不良者）に対して夜間の健康観察を続けていたところ、1名に発熱と脱水症状の疑いが生じ、現場班から応急処置と医療班への緊急搬送要請が入る。	現場班（避難誘導・保健師）	並木一丁目25番地周辺で待機中の高齢者のうち1名が発熱と脱水症状を訴え、現場班が応急処置（冷却・水分補給）を実施中。至急、医療班の現場派遣と搬送体制の確保を要請したい。	該当者は高齢者単身で、持病あり。現場は夜間・照明下での対応。医療班は近隣避難所に待機中だが、搬送車両が不足している。	淀川本流から約350mの低地。住宅密集地で標高差は小さく、南側の窪地に水が集まりやすい。都市型排水能力を超えた状態が長期化し、避難所も徒歩圏内で分散している。	夜間・避難所過密下での現場健康観察・応急処置・医療班連携の実践訓練。重症化リスクの早期発見・優先搬送判断力の向上を狙う。	現場での健康観察・応急処置、医療班との迅速な連携、搬送車両の確保・優先順位判断、夜間・仮設照明下での安全管理。	健康状態悪化者のリストアップ・本部への即時報告、応急処置の実施・医療班への搬送要請、搬送車両・人員の手配、現場・本部・医療班間の情報共有、他の待機者への健康注意喚起。	夜間・照明下での応急対応困難、搬送車両・人員不足による遅延、現場と医療班間の連携・情報伝達の遅れ、他の待機者の健康悪化リスク、住民不安の拡大	道路は膝程度の冠水継続、床下10〜15cmの浸水、下水逆流・悪臭あり	床下浸水長期化・下水逆流・健康被害拡大・避難所過密・現場待機者健康悪化・夜間対応	床下浸水と下水逆流・悪臭が継続し、避難所・サテライト避難所ともに満員状態。現場で待機中の高齢者の健康状態が悪化し、発熱・脱水症状が出現。夜間・照明下での応急対応・医療班連携・搬送体制の確保が求められている。	夜間照明・仮設テント等の迅速設置、現場待機者の健康・安全管理体制強化、追加搬送人員・車両の手配、応急処置・医療班連携の徹底、要配慮者名簿の活用と優先搬送、夜間対応マニュアルの徹底	平成25年台風18号時、同地域で避難所過密・現場待機者発生・夜間対応困難・照明不足による混乱や健康被害拡大が報告された。夜間の健康悪化者の早期発見・搬送が課題となった。	['床下浸水継続による家財・ガス設備・給湯器被害', '下水逆流による衛生被害・健康被害（体調不良者発生）', '生活物資不足による住民の体調不良・不安拡大', '救急搬送困難による重症化リスク', '避難所過密・受け入れ遅延', '医療資源逼迫による健康被害拡大', '現場待機者の健康・安全リスク']	['冠水長期化による孤立世帯の発生', '感染症・生活環境悪化による体調不良者増加', '支援班・救助班・医療班・救急隊の現場到着遅延', '臨時避難所運用・物資配布の遅延・混乱', '夜間・停電下での現場対応困難']
		1-18	350	発災82分後	現場での待機者の健康観察・夜間対応が継続する中、追加の照明機器や搬送車両の手配状況、現場と本部の情報共有体制の確認を目的とした現場巡回・点検が実施される。	現場班（避難誘導・物資搬送・保健師）	並木一丁目25番地周辺の現場班より『夜間対応のため設置した仮設照明やテントの稼働状況、待機中の高齢者・体調不良者の健康状態を巡回確認中。追加手配した照明機器・搬送車両の到着状況と、現場と本部・避難所間の連絡体制を再点検している』との報告。	現場待機者は引き続き高齢者・体調不良者数名。照明・テントは設置済みだが、電源やバッテリー残量の確認が必要。追加搬送車両の一部はまだ未到着。	淀川本流から約350mの低地。住宅密集地で標高差は小さく、南側の窪地に水が集まりやすい。都市型排水能力を超えた状態が長期化し、避難所も徒歩圏内で分散している。	夜間・過密対応下での現場点検・巡回による健康状態・安全管理の徹底、追加資機材の到着確認、現場と本部間の情報共有体制の再確認訓練。	夜間巡回による健康観察・安全確認、資機材（照明・搬送車両等）の到着状況把握、現場班・本部・避難所間の情報共有迅速化、住民・待機者への健康指導。	現場待機者の健康状態・安否の再確認、照明・テント等の設置・稼働状況の点検、資機材到着状況の本部への即時報告、現場と本部・避難所間の連絡体制再確認、住民・要配慮者への健康・安全指導。	夜間・停電下での巡回・点検の困難、追加資機材の到着遅延、現場と本部・避難所間の連絡ミスや情報伝達遅延、現場待機者の急変リスク、住民不安の拡大	道路は膝程度の冠水継続、床下10〜15cmの浸水、下水逆流・悪臭あり	床下浸水長期化・下水逆流・健康被害拡大・避難所過密・現場待機者健康管理・夜間対応	床下浸水と下水逆流・悪臭が継続し、避難所・サテライト避難所ともに満員状態。現場で待機中の高齢者・体調不良者の健康・安全管理が夜間も課題となり、仮設照明・テントの設置や追加搬送体制の調整が続いている。夜間の巡回・点検による安全確保と情報共有が重要。	夜間照明・仮設テント等の迅速設置・点検、現場待機者の健康・安全管理体制強化、追加搬送人員・車両の手配、情報共有体制の強化、要配慮者名簿の活用と優先搬送、夜間対応マニュアルの徹底	平成25年台風18号時、同地域で避難所過密・現場待機者発生・夜間対応困難・照明不足による混乱や健康被害拡大が報告された。巡回・点検の遅れによる急変対応遅延が課題となった。	['床下浸水継続による家財・ガス設備・給湯器被害', '下水逆流による衛生被害・健康被害（体調不良者発生）', '生活物資不足による住民の体調不良・不安拡大', '救急搬送困難による重症化リスク', '避難所過密・受け入れ遅延', '医療資源逼迫による健康被害拡大', '現場待機者の健康・安全リスク']	['冠水長期化による孤立世帯の発生', '感染症・生活環境悪化による体調不良者増加', '支援班・救助班・医療班・救急隊の現場到着遅延', '臨時避難所運用・物資配布の遅延・混乱', '夜間・停電下での現場対応困難']
		1-19	350	発災87分後	夜間対応が続く中、現場で待機中の高齢者・体調不良者の健康状態に急変がないかを再確認し、追加搬送車両の到着状況や照明機器の電源残量を本部へ報告するよう指示が出された。	現場班（避難誘導・保健師）	並木一丁目25番地周辺の現場班から『待機中の高齢者・体調不良者の健康観察を継続中。今のところ急変者なし。追加手配した搬送車両のうち1台が到着、照明機器のバッテリー残量も問題なし。これらの状況を本部へ報告した』との連絡。	待機者は引き続き数名。夜間で気温が低下傾向にあり、体調管理に注意が必要。追加搬送車両の手配は継続中。	淀川本流から約350mの低地。住宅密集地で標高差は小さく、南側の窪地に水が集まりやすい。都市型排水能力を超えた状態が長期化し、避難所も徒歩圏内で分散している。	夜間・過密対応下での現場健康観察・資機材管理・情報共有体制の徹底訓練。急変時の即応力・本部との連携強化を狙う。	夜間健康観察の継続、資機材（搬送車両・照明機器等）の管理状況把握、現場と本部間の情報共有迅速化、急変時の初動対応体制の強化。	現場待機者の健康状態を定時確認、資機材の稼働状況・残量の点検、状況を本部へ即時報告、急変時の応急対応準備、夜間の住民・要配慮者への健康指導。	夜間・停電下での健康観察・資機材管理の困難、搬送希望者の急増や急変時の即応遅れ、現場と本部間の連絡ミス、住民不安の拡大	道路は膝程度の冠水継続、床下10〜15cmの浸水、下水逆流・悪臭あり	床下浸水長期化・下水逆流・健康被害拡大・避難所過密・現場待機者健康管理・夜間対応	床下浸水と下水逆流・悪臭が継続し、避難所・サテライト避難所ともに満員状態。現場で待機中の高齢者・体調不良者の健康観察と資機材管理（照明・搬送車両）が夜間も重要課題となっている。急変時の即応体制と本部との情報共有が不可欠。	夜間照明・仮設テント等の設置・点検、現場待機者の健康・安全管理体制強化、追加搬送人員・車両の手配、情報共有体制の強化、要配慮者名簿の活用と優先搬送、夜間対応マニュアルの徹底	平成25年台風18号時、同地域で避難所過密・現場待機者発生・夜間対応困難・照明不足による混乱や健康被害拡大が報告された。巡回・点検の遅れによる急変対応遅延が課題となった。	['床下浸水継続による家財・ガス設備・給湯器被害', '下水逆流による衛生被害・健康被害（体調不良者発生）', '生活物資不足による住民の体調不良・不安拡大', '救急搬送困難による重症化リスク', '避難所過密・受け入れ遅延', '医療資源逼迫による健康被害拡大', '現場待機者の健康・安全リスク']	['冠水長期化による孤立世帯の発生', '感染症・生活環境悪化による体調不良者増加', '支援班・救助班・医療班・救急隊の現場到着遅延', '臨時避難所運用・物資配布の遅延・混乱', '夜間・停電下での現場対応困難']
		1-20	350	発災94分後	夜間の現場対応が継続する中、巡回班が待機中の高齢者・体調不良者の健康状態を再確認し、搬送希望者が新たに1名増加したため、搬送体制の再調整と資機材（照明・毛布等）の追加手配を本部に要請する。	現場班（避難誘導・保健師）	並木一丁目25番地周辺で夜間巡回中、待機中の高齢者のうち1名が寒さによる体調不良（震え・軽度の意識低下）を訴えたため、追加搬送を希望。現場班は応急保温・健康観察を実施しつつ、搬送体制と資機材（毛布・照明）の追加手配を本部へ要請した。	該当者は高齢者単身で、既往症あり。夜間の気温低下が著しく、他の待機者も寒さに不安を感じている様子。照明・毛布・飲料水の追加手配が必要。	淀川本流から約350mの低地。住宅密集地で標高差が小さく、南側の窪地に水が集まりやすい。都市型排水能力を超えた状態が長期化し、夜間の気温低下で体調悪化リスクが高まる。	夜間・寒冷下での現場健康観察・応急対応・資機材手配の実践訓練。急変リスクへの即応力と本部連携、資機材マネジメント力の向上を狙う。	夜間・寒冷下の健康観察、応急保温・資機材手配、搬送希望者の優先対応、現場と本部・避難所間の迅速な情報共有。	健康状態悪化者のリストアップ・即時報告、応急保温・健康観察の実施、資機材（毛布・照明等）の追加手配依頼、追加搬送体制の再調整、他の待機者への健康・安全指導。	夜間・寒冷下での応急対応困難、資機材不足による保温対策の遅れ、搬送希望者の増加による対応遅延、現場と本部間の連絡ミス、住民不安の拡大	道路は膝程度の冠水継続、床下10〜15cmの浸水、下水逆流・悪臭あり	床下浸水長期化・下水逆流・健康被害拡大・避難所過密・現場待機者健康管理・夜間対応・寒冷対策	床下浸水と下水逆流・悪臭が継続し、避難所・サテライト避難所ともに満員状態。現場で待機中の高齢者の健康状態が夜間の冷え込みで悪化し、追加搬送希望が発生。資機材（毛布・照明等）の追加手配と現場での応急保温・健康観察が必要となっている。	夜間照明・毛布・仮設テント等の設置・点検、現場待機者の健康・安全管理体制強化、追加搬送人員・車両の手配、情報共有体制の強化、要配慮者名簿の活用と優先搬送、夜間・寒冷下対応マニュアルの徹底	平成25年台風18号時、同地域で避難所過密・現場待機者発生・夜間対応困難・照明・毛布不足による健康被害拡大が報告された。夜間の体調急変や搬送遅延が課題となった。	['床下浸水継続による家財・ガス設備・給湯器被害', '下水逆流による衛生被害・健康被害（体調不良者発生）', '生活物資不足による住民の体調不良・不安拡大', '救急搬送困難による重症化リスク', '避難所過密・受け入れ遅延', '医療資源逼迫による健康被害拡大', '現場待機者の健康・安全リスク', '夜間・寒冷下での体調悪化']	['冠水長期化による孤立世帯の発生', '感染症・生活環境悪化による体調不良者増加', '支援班・救助班・医療班・救急隊の現場到着遅延', '臨時避難所運用・物資配布の遅延・混乱', '夜間・停電・寒冷下での現場対応困難']
		1-21	350	発災98分後	夜間対応が継続する中、現場班は待機中の高齢者・体調不良者の健康状態と資機材（照明・毛布・飲料水等）の消耗状況を再確認し、搬送希望者リストの優先順位付けと追加物資の到着状況を本部と共有する。	現場班（避難誘導・保健師）	並木一丁目25番地周辺で夜間巡回を実施し、待機中の高齢者・体調不良者の健康状態に大きな変化はないが、資機材（毛布・飲料水）の残量が減少しつつある。搬送希望者リストを本部と再確認し、優先順位付けと追加物資の到着状況を共有した。	現場待機者は引き続き数名。夜間の冷え込みが続いており、保温や飲料水の確保が重要。追加搬送車両・毛布・飲料水の手配は本部で調整中。	淀川本流から約350mの低地。住宅密集地で標高差が小さく、南側の窪地に水が集まりやすい。都市型排水能力を超えた状態が長期化し、夜間の気温低下で体調悪化リスクが高まる。	夜間・寒冷下での現場健康観察・資機材管理・搬送調整の実践訓練。急変リスクへの即応力、資機材マネジメント、本部・現場間の情報共有力向上を狙う。	夜間健康観察・資機材消耗状況の把握、搬送希望者の優先順位判断、追加物資・搬送体制の本部連携、現場と本部・避難所間の情報共有迅速化。	健康状態・資機材残量の定時確認と本部報告、搬送希望者リストの優先順位付け、追加物資・搬送体制の手配状況の把握、夜間の安全・健康指導、急変時の応急対応準備。	夜間・寒冷下での健康管理・資機材消耗への即応困難、搬送希望者の急増や資機材不足による対応遅延、現場と本部間の情報伝達遅延、住民不安の拡大	道路は膝程度の冠水継続、床下10〜15cmの浸水、下水逆流・悪臭あり	床下浸水長期化・下水逆流・健康被害拡大・避難所過密・現場待機者健康管理・夜間対応・資機材消耗	床下浸水と下水逆流・悪臭が継続し、避難所・サテライト避難所ともに満員状態。現場で待機中の高齢者・体調不良者の健康状態は大きな変化はないが、夜間の冷え込みと資機材（毛布・飲料水等）の消耗が進行。搬送希望者リストの優先順位付けと追加物資の手配・到着状況の把握が必要となっている。	夜間照明・毛布・飲料水等の資機材管理・追加手配、現場待機者の健康・安全管理体制強化、搬送希望者リストの優先順位判断・本部共有、情報共有体制の強化、要配慮者名簿の活用と優先搬送、夜間・寒冷下対応マニュアルの徹底	平成25年台風18号時、同地域で避難所過密・現場待機者発生・夜間対応困難・照明・毛布・飲料水不足による健康被害拡大が報告された。夜間の体調急変や搬送遅延が課題となった。	['床下浸水継続による家財・ガス設備・給湯器被害', '下水逆流による衛生被害・健康被害（体調不良者発生）', '生活物資不足による住民の体調不良・不安拡大', '救急搬送困難による重症化リスク', '避難所過密・受け入れ遅延', '医療資源逼迫による健康被害拡大', '現場待機者の健康・安全リスク', '夜間・寒冷下での体調悪化']	['冠水長期化による孤立世帯の発生', '感染症・生活環境悪化による体調不良者増加', '支援班・救助班・医療班・救急隊の現場到着遅延', '臨時避難所運用・物資配布の遅延・混乱', '夜間・停電・寒冷下での現場対応困難']
		1-22	350	発災101分後	夜間対応が継続する中、現場班は待機中の高齢者・体調不良者の健康状態および資機材（照明・毛布・飲料水等）の残量を再点検し、本部との情報共有を強化しつつ、急変時の応急体制を再確認するよう指示されている。	現場班（避難誘導・保健師）	並木一丁目25番地周辺で夜間巡回を継続し、待機中の高齢者・体調不良者の健康状態に大きな変化はないものの、資機材（毛布・飲料水等）の消耗が進んでいる。追加搬送希望者は現時点で増加していないが、夜間の冷え込みや疲労により体調悪化リスクが高まっているため、応急体制の再確認と本部への状況報告を実施。	追加搬送車両・毛布・飲料水の手配は本部で継続調整中。現場待機者は引き続き数名で、仮設照明・テントは稼働中。夜間の気温低下が続いており、保温対応に重点。	淀川本流から約350mの低地。住宅密集地で標高差が小さく、南側の窪地に水が集まりやすい。都市型排水能力を超えた状態が長期化し、夜間の気温低下で体調悪化リスクが高まる。	夜間・寒冷下での現場健康観察・資機材管理・急変即応体制の実践訓練。現場と本部間の情報共有・判断力の強化を狙う。	夜間健康観察・資機材消耗状況の定時把握、応急体制の再確認、現場と本部・避難所間の情報共有迅速化、急変時の初動対応準備。	健康状態・資機材残量の定時確認と本部報告、搬送希望者リストの優先順位再確認、追加物資・搬送体制の手配状況の把握、夜間の安全・健康指導、急変時の応急対応準備。	夜間・寒冷下での健康管理・資機材消耗への即応困難、急変時の対応遅延、現場と本部間の情報伝達遅延、住民不安の拡大	道路は膝程度の冠水継続、床下10〜15cmの浸水、下水逆流・悪臭あり	床下浸水長期化・下水逆流・健康被害拡大・避難所過密・現場待機者健康管理・夜間対応・資機材消耗	床下浸水と下水逆流・悪臭が継続し、避難所・サテライト避難所ともに満員状態。現場で待機中の高齢者・体調不良者の健康状態は大きな変化はないが、夜間の冷え込みと資機材（毛布・飲料水等）の消耗が進行。搬送希望者リストの優先順位付けと追加物資の手配・到着状況の把握が必要となっている。	夜間照明・毛布・飲料水等の資機材管理・追加手配、現場待機者の健康・安全管理体制強化、搬送希望者リストの優先順位判断・本部共有、情報共有体制の強化、要配慮者名簿の活用と優先搬送、夜間・寒冷下対応マニュアルの徹底	平成25年台風18号時、同地域で避難所過密・現場待機者発生・夜間対応困難・照明・毛布・飲料水不足による健康被害拡大が報告された。夜間の体調急変や搬送遅延が課題となった。	['床下浸水継続による家財・ガス設備・給湯器被害', '下水逆流による衛生被害・健康被害（体調不良者発生）', '生活物資不足による住民の体調不良・不安拡大', '救急搬送困難による重症化リスク', '避難所過密・受け入れ遅延', '医療資源逼迫による健康被害拡大', '現場待機者の健康・安全リスク', '夜間・寒冷下での体調悪化']	['冠水長期化による孤立世帯の発生', '感染症・生活環境悪化による体調不良者増加', '支援班・救助班・医療班・救急隊の現場到着遅延', '臨時避難所運用・物資配布の遅延・混乱', '夜間・停電・寒冷下での現場対応困難']
		1-23	350	発災106分後	夜間対応が続く中、現場班は仮設照明・毛布など資機材のバッテリー・残量を再点検し、住民健康観察とともに、資機材不足時の応急対応や代替策（手持ちライト・誘導灯利用等）の指示が本部から出されている。	現場班（避難誘導・保健師）	並木一丁目25番地周辺での夜間巡回にて、仮設照明や毛布の残量がさらに減少し、一部照明のバッテリー残量が低下。追加手配中の資機材の到着が遅れているため、本部からは手持ちライトや誘導灯等を活用した応急照明・安全確保策の実施指示が出た。住民・待機者の健康状態には大きな変化はないが、資機材不足による不安の声が一部で上がっている。	追加照明・毛布・飲料水などの資機材は本部で手配・搬送中。現場待機者は引き続き数名。夜間の気温低下が続き、保温・安全確保が課題。	淀川本流から約350mの低地。住宅密集地で標高差が小さく、南側の窪地に水が集まりやすい。都市型排水能力を超えた状態が長期化し、夜間の気温低下で体調悪化リスクが高まる。	夜間・資機材不足時の現場応急対応力・代替策活用力・本部連携・住民安全確保の訓練。現場判断力と情報共有力の強化を狙う。	資機材（照明・毛布等）の消耗状況把握と応急対応、手持ち資機材の工夫活用、現場と本部間の迅速な情報共有、夜間巡回・健康観察・安全指導の継続。	資機材残量の再点検と本部報告、手持ちライト・誘導灯等の応急活用、住民・待機者への安全指導・健康観察継続、追加資機材到着までの応急体制維持、本部との情報共有強化。	照明・毛布等の資機材不足による夜間対応・健康観察の困難、応急対応の工夫が必要な現場での混乱、住民不安拡大、資機材到着遅延による対応遅れ、現場と本部間の情報伝達遅延	道路は膝程度の冠水継続、床下10〜15cmの浸水、下水逆流・悪臭あり	床下浸水長期化・下水逆流・健康被害拡大・避難所過密・現場待機者健康管理・夜間対応・資機材不足	床下浸水と下水逆流・悪臭が継続し、避難所・サテライト避難所ともに満員状態。現場で待機中の高齢者・体調不良者の健康観察と保温・安全確保が夜間も課題。照明や毛布などの資機材消耗が進み、追加手配が遅れる中で応急対応や代替策の工夫が求められている。	夜間照明・毛布等の資機材管理・追加手配、手持ち資機材の応急活用、現場待機者の健康・安全管理体制強化、情報共有体制の強化、要配慮者名簿の活用と優先搬送、夜間・寒冷下対応マニュアルの徹底	平成25年台風18号時、同地域で避難所過密・現場待機者発生・夜間対応困難・照明・毛布不足による健康被害拡大が報告された。夜間の体調急変や搬送遅延、資機材不足時の応急対応の遅れが課題となった。	['床下浸水継続による家財・ガス設備・給湯器被害', '下水逆流による衛生被害・健康被害（体調不良者発生）', '生活物資不足による住民の体調不良・不安拡大', '救急搬送困難による重症化リスク', '避難所過密・受け入れ遅延', '医療資源逼迫による健康被害拡大', '現場待機者の健康・安全リスク', '夜間・寒冷下での体調悪化', '資機材（照明・毛布等）不足による夜間対応困難']	['冠水長期化による孤立世帯の発生', '感染症・生活環境悪化による体調不良者増加', '支援班・救助班・医療班・救急隊の現場到着遅延', '臨時避難所運用・物資配布の遅延・混乱', '夜間・停電・寒冷下での現場対応困難']
		1-24	350	発災111分後	夜間対応が続く中、現場班は照明・毛布等の資機材の残量低下を受けて、住民・待機者の安全確保と健康観察を継続。手持ちライトや誘導灯を活用した応急照明で夜間巡回・見守りを実施し、資機材到着までの応急体制維持が指示されている。	現場班（避難誘導・保健師）	並木一丁目25番地周辺の現場班から『仮設照明や毛布などの資機材残量がさらに減少し、照明の明るさが不足し始めている。手持ちライトや誘導灯を使って夜間巡回・健康観察・安全指導を継続中。追加資機材の到着までは応急体制で対応している』との報告。	追加照明・毛布・飲料水等の資機材は本部で手配中だが、道路冠水・渋滞等で到着が遅延。現場待機者は高齢者・体調不良者を中心に数名。夜間の冷え込みが続き、住民の不安が高まっている。	淀川本流から約350mの低地。住宅密集地で標高差が小さく、南側の窪地に水が集まりやすい。都市型排水能力を超えた状態が長期化し、夜間の気温低下で体調悪化リスクが高まる。	夜間・資機材不足時の応急対応力・代替策活用力・現場判断力・本部連携・住民安全確保の訓練。現場リーダーの判断・住民安心感の維持を狙う。	資機材不足時の応急対応（手持ちライト・誘導灯活用）、夜間巡回・健康観察・安全指導、現場と本部間の情報共有・追加要請、住民不安への対応。	資機材残量の再点検・本部報告、手持ち資機材の応急活用、住民・待機者への安全指導・健康観察継続、追加資機材到着までの応急体制維持、本部との連携強化。	照明・毛布等の資機材不足による夜間対応・健康観察の困難、応急対応の工夫が必要な現場での混乱、住民不安拡大、資機材到着遅延による対応遅れ、現場と本部間の情報伝達遅延	道路は膝程度の冠水継続、床下10〜15cmの浸水、下水逆流・悪臭あり	床下浸水長期化・下水逆流・健康被害拡大・避難所過密・現場待機者健康管理・夜間対応・資機材不足	床下浸水と下水逆流・悪臭が継続し、避難所・サテライト避難所ともに満員状態。現場で待機中の高齢者・体調不良者の健康観察と保温・安全確保が夜間も課題。照明や毛布などの資機材消耗が進み、追加手配の遅れにより応急対応や工夫が求められている。	夜間照明・毛布等の資機材管理・追加手配、手持ち資機材の応急活用、現場待機者の健康・安全管理体制強化、情報共有体制の強化、要配慮者名簿の活用と優先搬送、夜間・寒冷下対応マニュアルの徹底	平成25年台風18号時、同地域で避難所過密・現場待機者発生・夜間対応困難・照明・毛布不足による健康被害拡大が報告された。夜間の体調急変や搬送遅延、資機材不足時の応急対応の遅れが課題となった。	['床下浸水継続による家財・ガス設備・給湯器被害', '下水逆流による衛生被害・健康被害（体調不良者発生）', '生活物資不足による住民の体調不良・不安拡大', '救急搬送困難による重症化リスク', '避難所過密・受け入れ遅延', '医療資源逼迫による健康被害拡大', '現場待機者の健康・安全リスク', '夜間・寒冷下での体調悪化', '資機材（照明・毛布等）不足による夜間対応困難']	['冠水長期化による孤立世帯の発生', '感染症・生活環境悪化による体調不良者増加', '支援班・救助班・医療班・救急隊の現場到着遅延', '臨時避難所運用・物資配布の遅延・混乱', '夜間・停電・寒冷下での現場対応困難']
		1-25	350	発災116分後	夜間対応が続く中、現場班は手持ちライトや誘導灯による応急照明で夜間巡回・健康観察・見守りを継続しているが、住民・待機者からは資機材到着の遅れや安全・防寒への不安の声が強まっている。現場リーダーは本部と連携し、住民の夜間移動制限や転倒防止策、健康急変時の応急手当マニュアルの再確認を指示。	現場班（避難誘導・保健師）	並木一丁目25番地周辺の現場班より『仮設照明や毛布の残量がほぼ尽き、手持ちライト・誘導灯で夜間巡回・健康観察・安全指導を継続中。住民や待機者からは資機材の到着遅延や寒さ・暗さへの不安の声が多く、夜間移動の制限と転倒防止策の徹底を指示している。健康急変時の応急手当マニュアルも現場で再確認した』との報告。	追加照明・毛布・飲料水等の資機材は本部で手配・搬送中だが、道路冠水や渋滞で到着がさらに遅延。現場待機者は高齢者・体調不良者を中心に数名。夜間の冷え込みが続き、住民の不安が高まっている。	淀川本流から約350mの低地。住宅密集地で標高差が小さく、南側の窪地に水が集まりやすい。都市型排水能力を超えた状態が長期化し、夜間の気温低下で体調悪化リスクが高まる。	資機材不足・夜間対応下での現場リーダーの判断力・応急対応力・住民安全確保・本部連携力の訓練。住民不安の把握・安全対策・情報共有力の強化を狙う。	資機材不足時の応急対応（手持ちライト・誘導灯活用）、夜間巡回・健康観察・安全指導、住民不安への対応、夜間移動制限・転倒防止策・応急手当マニュアルの再確認、本部との情報共有・追加要請。	資機材残量・住民不安の本部報告、手持ち資機材の最大活用、住民・待機者への夜間移動制限・転倒防止指導、健康急変時の応急手当マニュアルの徹底、追加資機材到着までの応急体制維持、本部との連携強化。	照明・毛布等の資機材不足による夜間対応・健康観察の困難、応急対応の工夫が必要な現場での混乱、住民不安・パニックの拡大、資機材到着遅延による対応遅れ、現場と本部間の情報伝達遅延	道路は膝程度の冠水継続、床下10〜15cmの浸水、下水逆流・悪臭あり	床下浸水長期化・下水逆流・健康被害拡大・避難所過密・現場待機者健康管理・夜間対応・資機材不足	床下浸水と下水逆流・悪臭が継続し、避難所・サテライト避難所ともに満員状態。現場で待機中の高齢者・体調不良者の健康観察と保温・安全確保が夜間も課題。照明や毛布などの資機材消耗が進み、追加手配の遅れにより応急対応や工夫が求められている。住民の不安や夜間の転倒事故リスクが増大している。	夜間照明・毛布等の資機材管理・追加手配、手持ち資機材の応急活用、現場待機者の健康・安全管理体制強化、情報共有体制の強化、要配慮者名簿の活用と優先搬送、夜間・寒冷下対応マニュアルの徹底	平成25年台風18号時、同地域で避難所過密・現場待機者発生・夜間対応困難・照明・毛布不足による健康被害拡大が報告された。夜間の体調急変や搬送遅延、資機材不足時の応急対応の遅れが課題となった。	['床下浸水継続による家財・ガス設備・給湯器被害', '下水逆流による衛生被害・健康被害（体調不良者発生）', '生活物資不足による住民の体調不良・不安拡大', '救急搬送困難による重症化リスク', '避難所過密・受け入れ遅延', '医療資源逼迫による健康被害拡大', '現場待機者の健康・安全リスク', '夜間・寒冷下での体調悪化', '資機材（照明・毛布等）不足による夜間対応困難']	['冠水長期化による孤立世帯の発生', '感染症・生活環境悪化による体調不良者増加', '支援班・救助班・医療班・救急隊の現場到着遅延', '臨時避難所運用・物資配布の遅延・混乱', '夜間・停電・寒冷下での現場対応困難']
		1-26	350	発災123分後	夜間対応が継続し、現場では照明・毛布等の資機材が枯渇した状態で巡回・健康観察・安全指導を継続。住民や待機者の不安がピークに達しつつある中、現場リーダーは転倒事故や体調急変時の応急対応の再徹底、住民同士の声かけ・見守り体制強化を指示。	現場班（避難誘導・保健師）	並木一丁目25番地周辺の現場班から『照明・毛布などの資機材は完全に尽き、夜間は手持ちライトや誘導灯のみで巡回・健康観察・安全指導を継続中。住民や待機者からは資機材到着遅延や寒さ・暗さへの不安が頂点に達している。転倒や体調急変時の応急手当マニュアルの再確認と、住民同士の見守り・声かけを強化するよう指示』との報告。	追加資機材（照明・毛布・飲料水等）は依然として道路冠水や渋滞で未到着。現場待機者は高齢者・体調不良者が中心。夜間の冷え込みが厳しく、住民の不安や疲労が強い。	淀川本流から約350mの低地。住宅密集地で標高差が小さく、南側の窪地に水が集まりやすい。都市型排水能力を超えた状態が長期化し、夜間の気温低下で体調悪化リスクが高まる。	資機材枯渇・夜間対応下での現場リーダーの判断・応急対応・住民安全確保・本部連携の訓練。住民不安の把握・安全対策・見守り体制の強化を狙う。	資機材完全枯渇時の応急対応（手持ちライト・誘導灯活用）、住民の声かけ・見守り体制強化、夜間巡回・健康観察・安全指導、転倒・体調急変時の応急手当マニュアルの徹底、本部への情報共有・追加要請。	資機材枯渇状況・住民不安の本部報告、手持ち資機材の最大活用、住民同士の見守り・声かけ体制の強化、夜間移動制限・転倒防止指導、応急手当マニュアルの再周知・徹底、追加資機材到着までの応急体制維持、本部との連携強化。	資機材枯渇による夜間対応・健康観察の困難、応急対応の工夫が必要な現場での混乱、住民不安・パニックの拡大、資機材到着遅延による対応遅れ、現場と本部間の情報伝達遅延	道路は膝程度の冠水が継続、床下10〜15cmの浸水、下水逆流・悪臭あり	床下浸水長期化・下水逆流・健康被害拡大・避難所過密・現場待機者健康管理・夜間対応・資機材枯渇	床下浸水と下水逆流・悪臭が継続し、避難所・サテライト避難所ともに満員状態。現場で待機中の高齢者・体調不良者の健康観察と保温・安全確保が夜間も課題。照明や毛布などの資機材が完全に枯渇し、住民の不安や夜間の転倒事故・体調急変リスクがさらに増大している。住民同士の見守り・声かけ体制が重要。	夜間照明・毛布等の資機材管理・追加手配、手持ち資機材の応急活用、住民同士の見守り・声かけ体制強化、現場待機者の健康・安全管理体制強化、情報共有体制の強化、要配慮者名簿の活用と優先搬送、夜間・寒冷下対応マニュアルの徹底	平成25年台風18号時、同地域で避難所過密・現場待機者発生・夜間対応困難・照明・毛布不足による健康被害拡大が報告された。夜間の体調急変や搬送遅延、資機材不足時の応急対応の遅れが課題となった。	['床下浸水継続による家財・ガス設備・給湯器被害', '下水逆流による衛生被害・健康被害（体調不良者発生）', '生活物資不足による住民の体調不良・不安拡大', '救急搬送困難による重症化リスク', '避難所過密・受け入れ遅延', '医療資源逼迫による健康被害拡大', '現場待機者の健康・安全リスク', '夜間・寒冷下での体調悪化', '資機材（照明・毛布等）枯渇による夜間対応困難']	['冠水長期化による孤立世帯の発生', '感染症・生活環境悪化による体調不良者増加', '支援班・救助班・医療班・救急隊の現場到着遅延', '臨時避難所運用・物資配布の遅延・混乱', '夜間・停電・寒冷下での現場対応困難']
		1-27	350	発災126分後	照明・毛布等の資機材が枯渇したまま夜間巡回・健康観察・安全指導を継続。住民同士の見守り・声かけ体制を強化しつつ、転倒事故や体調急変時の応急対応徹底を再確認。住民の不安が高い状態で、現場リーダーが本部と密に連携し追加資機材要請と状況報告を続けている。	現場班（避難誘導・保健師）	並木一丁目25番地周辺の現場班より『資機材は完全に尽き、手持ちライトや誘導灯だけで夜間の巡回・健康観察・安全指導を続けている。住民の不安や疲労が強く、転倒や体調急変リスクへの注意喚起と住民同士の見守りを強化している。追加資機材の到着状況を本部と随時共有中』との報告。	追加資機材（照明・毛布・飲料水等）は道路冠水や渋滞で依然未到着。現場待機者は高齢者・体調不良者が中心。住民同士の見守りや声かけ体制を強化するよう指示済み。	淀川本流から約350mの低地。住宅密集地で標高差が小さく、南側の窪地に水が集まりやすい。都市型排水能力を超えた状態が長期化し、夜間の気温低下で体調悪化リスクが高まる。	資機材枯渇・夜間対応下での現場判断・応急対応・住民安全確保・本部連携の訓練。住民不安の把握・安全対策・見守り体制の強化を狙う。	資機材完全枯渇時の応急対応（手持ちライト・誘導灯活用）、住民同士の見守り体制強化、夜間巡回・健康観察・安全指導、転倒・体調急変時の応急手当マニュアル徹底、本部への情報共有・追加要請。	資機材枯渇状況・住民不安の本部報告、手持ち資機材の最大活用、住民同士の見守り・声かけ体制の強化、夜間移動制限・転倒防止指導、応急手当マニュアルの再周知・徹底、追加資機材到着までの応急体制維持、本部との連携強化。	資機材枯渇による夜間対応・健康観察の困難、応急対応の工夫が必要な現場での混乱、住民不安・パニックの拡大、資機材到着遅延による対応遅れ、現場と本部間の情報伝達遅延	道路は膝程度の冠水が継続、床下10〜15cmの浸水、下水逆流・悪臭あり	床下浸水長期化・下水逆流・健康被害拡大・避難所過密・現場待機者健康管理・夜間対応・資機材枯渇	床下浸水と下水逆流・悪臭が継続し、避難所・サテライト避難所ともに満員状態。現場で待機中の高齢者・体調不良者の健康観察と保温・安全確保が夜間も課題。照明や毛布などの資機材が完全に枯渇し、住民の不安や夜間の転倒事故・体調急変リスクがさらに増大している。住民同士の見守り・声かけ体制が重要。	夜間照明・毛布等の資機材管理・追加手配、手持ち資機材の応急活用、住民同士の見守り・声かけ体制強化、現場待機者の健康・安全管理体制強化、情報共有体制の強化、要配慮者名簿の活用と優先搬送、夜間・寒冷下対応マニュアルの徹底	平成25年台風18号時、同地域で避難所過密・現場待機者発生・夜間対応困難・照明・毛布不足による健康被害拡大が報告された。夜間の体調急変や搬送遅延、資機材不足時の応急対応の遅れが課題となった。	['床下浸水継続による家財・ガス設備・給湯器被害', '下水逆流による衛生被害・健康被害（体調不良者発生）', '生活物資不足による住民の体調不良・不安拡大', '救急搬送困難による重症化リスク', '避難所過密・受け入れ遅延', '医療資源逼迫による健康被害拡大', '現場待機者の健康・安全リスク', '夜間・寒冷下での体調悪化', '資機材（照明・毛布等）枯渇による夜間対応困難']	['冠水長期化による孤立世帯の発生', '感染症・生活環境悪化による体調不良者増加', '支援班・救助班・医療班・救急隊の現場到着遅延', '臨時避難所運用・物資配布の遅延・混乱', '夜間・停電・寒冷下での現場対応困難']
		1-28	350	発災132分後	照明・毛布等の資機材枯渇が続く中、夜間巡回・健康観察・安全指導を手持ちライトや誘導灯のみで継続。住民同士の見守り・声かけ体制強化と、転倒事故や体調急変時の対応徹底が続行されている。	現場班（避難誘導・保健師）	並木一丁目25番地周辺の現場班から『資機材は依然として未到着で、手持ちライトや誘導灯のみで夜間の健康観察・安全指導・見守りを継続している。住民の不安や疲労が強く、転倒や体調急変リスクへの注意喚起と住民同士の見守りを引き続き強化している。追加資機材の到着状況を本部と共有しつつ、応急手当マニュアルの再確認を実施中』との報告。	追加資機材（照明・毛布・飲料水等）は道路冠水・渋滞で依然未到着。現場待機者は高齢者・体調不良者が中心。夜間の冷え込みと暗さで住民の不安がさらに高まっている。	淀川本流から約350mの低地。住宅密集地で標高差が小さく、南側の窪地に水が集まりやすい。都市型排水能力を超えた状態が長期化し、夜間の気温低下で体調悪化リスクが高まる。	資機材枯渇・夜間対応下での現場主導による応急対応・住民安全確保・本部連携の実践訓練。住民不安の把握・安全対策・見守り体制の強化を狙う。	資機材枯渇時の応急対応（手持ちライト・誘導灯活用）、住民同士の見守り体制強化、夜間巡回・健康観察・安全指導、転倒・体調急変時の応急手当マニュアル徹底、本部への情報共有・追加要請。	資機材枯渇状況・住民不安の本部報告、手持ち資機材の最大活用、住民同士の見守り・声かけ体制強化、夜間移動制限・転倒防止指導、応急手当マニュアルの再周知・徹底、追加資機材到着までの応急体制維持、本部との連携強化。	資機材枯渇による夜間対応・健康観察の困難、応急対応の工夫が必要な現場での混乱、住民不安・パニックの拡大、資機材到着遅延による対応遅れ、現場と本部間の情報伝達遅延	道路は膝程度の冠水継続、床下10〜15cmの浸水、下水逆流・悪臭あり	床下浸水長期化・下水逆流・健康被害拡大・避難所過密・現場待機者健康管理・夜間対応・資機材枯渇	床下浸水と下水逆流・悪臭が継続し、避難所・サテライト避難所ともに満員状態。現場で待機中の高齢者・体調不良者の健康観察と保温・安全確保が夜間も課題。照明や毛布などの資機材が完全に枯渇し、住民の不安や夜間の転倒事故・体調急変リスクがさらに増大している。住民同士の見守り・声かけ体制が重要。	夜間照明・毛布等の資機材管理・追加手配、手持ち資機材の応急活用、住民同士の見守り・声かけ体制強化、現場待機者の健康・安全管理体制強化、情報共有体制の強化、要配慮者名簿の活用と優先搬送、夜間・寒冷下対応マニュアルの徹底	平成25年台風18号時、同地域で避難所過密・現場待機者発生・夜間対応困難・照明・毛布不足による健康被害拡大が報告された。夜間の体調急変や搬送遅延、資機材不足時の応急対応の遅れが課題となった。	['床下浸水継続による家財・ガス設備・給湯器被害', '下水逆流による衛生被害・健康被害（体調不良者発生）', '生活物資不足による住民の体調不良・不安拡大', '救急搬送困難による重症化リスク', '避難所過密・受け入れ遅延', '医療資源逼迫による健康被害拡大', '現場待機者の健康・安全リスク', '夜間・寒冷下での体調悪化', '資機材（照明・毛布等）枯渇による夜間対応困難']	['冠水長期化による孤立世帯の発生', '感染症・生活環境悪化による体調不良者増加', '支援班・救助班・医療班・救急隊の現場到着遅延', '臨時避難所運用・物資配布の遅延・混乱', '夜間・停電・寒冷下での現場対応困難']
		1-29	350	発災137分後	照明・毛布等の資機材枯渇が続く中、夜間の健康観察・安全指導・見守りを手持ちライトや誘導灯のみで継続。住民同士の声かけ・見守り体制の維持と、転倒事故・体調急変時の応急手当マニュアル徹底が強調され、現場リーダーからは住民の不安把握・安全対策強化、本部への追加資機材要請の継続が指示されている。	現場班（避難誘導・保健師）	並木一丁目25番地周辺の現場班より『資機材は依然未到着で、手持ちライトや誘導灯のみで夜間の健康観察・安全指導・見守りを続けている。住民の不安や疲労が強く、転倒や体調急変リスクへの注意喚起と住民同士の見守りを引き続き強化している。追加資機材の到着状況を本部と共有しながら、応急手当マニュアルの再確認も行っている』との報告。	追加資機材（照明・毛布・飲料水等）は道路冠水・渋滞で依然未到着。現場待機者は高齢者・体調不良者が中心。夜間の冷え込みと暗さで住民の不安がさらに高まっている。	淀川本流から約350mの低地。住宅密集地で標高差が小さく、南側の窪地に水が集まりやすい。都市型排水能力を超えた状態が長期化し、夜間の気温低下で体調悪化リスクが高まる。	資機材枯渇・夜間対応下での現場主導による応急対応・住民安全確保・本部連携の実践訓練。住民不安の把握・安全対策・見守り体制の強化を狙う。	資機材枯渇時の応急対応（手持ちライト・誘導灯活用）、住民同士の見守り体制強化、夜間巡回・健康観察・安全指導、転倒・体調急変時の応急手当マニュアル徹底、本部への情報共有・追加要請。	資機材枯渇状況・住民不安の本部報告、手持ち資機材の最大活用、住民同士の見守り・声かけ体制強化、夜間移動制限・転倒防止指導、応急手当マニュアルの再周知・徹底、追加資機材到着までの応急体制維持、本部との連携強化。	資機材枯渇による夜間対応・健康観察の困難、応急対応の工夫が必要な現場での混乱、住民不安・パニックの拡大、資機材到着遅延による対応遅れ、現場と本部間の情報伝達遅延	道路は膝程度の冠水継続、床下10〜15cmの浸水、下水逆流・悪臭あり	床下浸水長期化・下水逆流・健康被害拡大・避難所過密・現場待機者健康管理・夜間対応・資機材枯渇	床下浸水と下水逆流・悪臭が継続し、避難所・サテライト避難所ともに満員状態。現場で待機中の高齢者・体調不良者の健康観察と保温・安全確保が夜間も課題。照明や毛布などの資機材が完全に枯渇し、住民の不安や夜間の転倒事故・体調急変リスクがさらに増大している。住民同士の見守り・声かけ体制が重要。	夜間照明・毛布等の資機材管理・追加手配、手持ち資機材の応急活用、住民同士の見守り・声かけ体制強化、現場待機者の健康・安全管理体制強化、情報共有体制の強化、要配慮者名簿の活用と優先搬送、夜間・寒冷下対応マニュアルの徹底	平成25年台風18号時、同地域で避難所過密・現場待機者発生・夜間対応困難・照明・毛布不足による健康被害拡大が報告された。夜間の体調急変や搬送遅延、資機材不足時の応急対応の遅れが課題となった。	['床下浸水継続による家財・ガス設備・給湯器被害', '下水逆流による衛生被害・健康被害（体調不良者発生）', '生活物資不足による住民の体調不良・不安拡大', '救急搬送困難による重症化リスク', '避難所過密・受け入れ遅延', '医療資源逼迫による健康被害拡大', '現場待機者の健康・安全リスク', '夜間・寒冷下での体調悪化', '資機材（照明・毛布等）枯渇による夜間対応困難']	['冠水長期化による孤立世帯の発生', '感染症・生活環境悪化による体調不良者増加', '支援班・救助班・医療班・救急隊の現場到着遅延', '臨時避難所運用・物資配布の遅延・混乱', '夜間・停電・寒冷下での現場対応困難']
		1-30	350	発災142分後	照明・毛布等の資機材枯渇が続き、夜間の健康観察・安全指導・見守りを手持ちライトや誘導灯のみで継続。住民同士の見守り・声かけ体制を維持しながら、転倒事故や体調急変時の応急手当マニュアルの徹底、本部への追加資機材要請・状況報告を継続。	現場班（避難誘導・保健師）	並木一丁目25番地周辺の現場班より『資機材は依然未到着で、手持ちライトや誘導灯のみで夜間の健康観察・安全指導・見守りを継続している。住民の不安や疲労が強く、転倒や体調急変リスクへの注意喚起と住民同士の見守り強化を継続。追加資機材の到着状況は本部と随時共有し、応急手当マニュアルの再確認も実施中』との報告。	追加資機材（照明・毛布・飲料水等）は道路冠水・渋滞で依然未到着。現場待機者は高齢者・体調不良者が中心。夜間の冷え込みと暗さで住民の不安がさらに高まっている。	淀川本流から約350mの低地。住宅密集地で標高差が小さく、南側の窪地に水が集まりやすい。都市型排水能力を超えた状態が長期化し、夜間の気温低下で体調悪化リスクが高まる。	資機材枯渇・夜間対応下での現場主導による応急対応・住民安全確保・本部連携の実践訓練。住民不安の把握・安全対策・見守り体制の強化を狙う。	資機材枯渇時の応急対応（手持ちライト・誘導灯活用）、住民同士の見守り体制強化、夜間巡回・健康観察・安全指導、転倒・体調急変時の応急手当マニュアル徹底、本部への情報共有・追加要請。	資機材枯渇状況・住民不安の本部報告、手持ち資機材の最大活用、住民同士の見守り・声かけ体制強化、夜間移動制限・転倒防止指導、応急手当マニュアルの再周知・徹底、追加資機材到着までの応急体制維持、本部との連携強化。	資機材枯渇による夜間対応・健康観察の困難、応急対応の工夫が必要な現場での混乱、住民不安・パニックの拡大、資機材到着遅延による対応遅れ、現場と本部間の情報伝達遅延	道路は膝程度の冠水継続、床下10〜15cmの浸水、下水逆流・悪臭あり	床下浸水長期化・下水逆流・健康被害拡大・避難所過密・現場待機者健康管理・夜間対応・資機材枯渇	床下浸水と下水逆流・悪臭が継続し、避難所・サテライト避難所ともに満員状態。現場で待機中の高齢者・体調不良者の健康観察と保温・安全確保が夜間も課題。照明や毛布などの資機材が完全に枯渇し、住民の不安や夜間の転倒事故・体調急変リスクがさらに増大している。住民同士の見守り・声かけ体制が重要。	夜間照明・毛布等の資機材管理・追加手配、手持ち資機材の応急活用、住民同士の見守り・声かけ体制強化、現場待機者の健康・安全管理体制強化、情報共有体制の強化、要配慮者名簿の活用と優先搬送、夜間・寒冷下対応マニュアルの徹底	平成25年台風18号時、同地域で避難所過密・現場待機者発生・夜間対応困難・照明・毛布不足による健康被害拡大が報告された。夜間の体調急変や搬送遅延、資機材不足時の応急対応の遅れが課題となった。	['床下浸水継続による家財・ガス設備・給湯器被害', '下水逆流による衛生被害・健康被害（体調不良者発生）', '生活物資不足による住民の体調不良・不安拡大', '救急搬送困難による重症化リスク', '避難所過密・受け入れ遅延', '医療資源逼迫による健康被害拡大', '現場待機者の健康・安全リスク', '夜間・寒冷下での体調悪化', '資機材（照明・毛布等）枯渇による夜間対応困難']	['冠水長期化による孤立世帯の発生', '感染症・生活環境悪化による体調不良者増加', '支援班・救助班・医療班・救急隊の現場到着遅延', '臨時避難所運用・物資配布の遅延・混乱', '夜間・停電・寒冷下での現場対応困難']
		1-31	350	発災147分後	照明・毛布等の資機材枯渇が続く中、夜間の健康観察・安全指導・見守りを手持ちライトや誘導灯のみで継続。住民同士の見守り・声かけ体制を維持し、転倒事故や体調急変時の応急手当マニュアルの徹底、本部への追加資機材要請・状況報告を継続している。	現場班（避難誘導・保健師）	並木一丁目25番地周辺の現場班より『資機材は依然未到着で、手持ちライトや誘導灯のみで夜間の健康観察・安全指導・見守りを継続している。住民の不安や疲労が強く、転倒や体調急変リスクへの注意喚起と住民同士の見守り強化を継続。追加資機材の到着状況は本部と随時共有し、応急手当マニュアルの再確認も実施中』との報告。	追加資機材（照明・毛布・飲料水等）は道路冠水・渋滞で依然未到着。現場待機者は高齢者・体調不良者が中心。夜間の冷え込みと暗さで住民の不安がさらに高まっている。	淀川本流から約350mの低地。住宅密集地で標高差が小さく、南側の窪地に水が集まりやすい。都市型排水能力を超えた状態が長期化し、夜間の気温低下で体調悪化リスクが高まる。	資機材枯渇・夜間対応下での現場主導による応急対応・住民安全確保・本部連携の実践訓練。住民不安の把握・安全対策・見守り体制の強化を狙う。	資機材枯渇時の応急対応（手持ちライト・誘導灯活用）、住民同士の見守り体制強化、夜間巡回・健康観察・安全指導、転倒・体調急変時の応急手当マニュアル徹底、本部への情報共有・追加要請。	資機材枯渇状況・住民不安の本部報告、手持ち資機材の最大活用、住民同士の見守り・声かけ体制強化、夜間移動制限・転倒防止指導、応急手当マニュアルの再周知・徹底、追加資機材到着までの応急体制維持、本部との連携強化。	資機材枯渇による夜間対応・健康観察の困難、応急対応の工夫が必要な現場での混乱、住民不安・パニックの拡大、資機材到着遅延による対応遅れ、現場と本部間の情報伝達遅延	道路は膝程度の冠水継続、床下10〜15cmの浸水、下水逆流・悪臭あり	床下浸水長期化・下水逆流・健康被害拡大・避難所過密・現場待機者健康管理・夜間対応・資機材枯渇	床下浸水と下水逆流・悪臭が継続し、避難所・サテライト避難所ともに満員状態。現場で待機中の高齢者・体調不良者の健康観察と保温・安全確保が夜間も課題。照明や毛布などの資機材が完全に枯渇し、住民の不安や夜間の転倒事故・体調急変リスクがさらに増大している。住民同士の見守り・声かけ体制が重要。	夜間照明・毛布等の資機材管理・追加手配、手持ち資機材の応急活用、住民同士の見守り・声かけ体制強化、現場待機者の健康・安全管理体制強化、情報共有体制の強化、要配慮者名簿の活用と優先搬送、夜間・寒冷下対応マニュアルの徹底	平成25年台風18号時、同地域で避難所過密・現場待機者発生・夜間対応困難・照明・毛布不足による健康被害拡大が報告された。夜間の体調急変や搬送遅延、資機材不足時の応急対応の遅れが課題となった。	['床下浸水継続による家財・ガス設備・給湯器被害', '下水逆流による衛生被害・健康被害（体調不良者発生）', '生活物資不足による住民の体調不良・不安拡大', '救急搬送困難による重症化リスク', '避難所過密・受け入れ遅延', '医療資源逼迫による健康被害拡大', '現場待機者の健康・安全リスク', '夜間・寒冷下での体調悪化', '資機材（照明・毛布等）枯渇による夜間対応困難']	['冠水長期化による孤立世帯の発生', '感染症・生活環境悪化による体調不良者増加', '支援班・救助班・医療班・救急隊の現場到着遅延', '臨時避難所運用・物資配布の遅延・混乱', '夜間・停電・寒冷下での現場対応困難']
		1-32	350	発災151分後	照明・毛布等の資機材枯渇が続く中、夜間の健康観察・安全指導・見守りを手持ちライトや誘導灯のみで継続。住民同士の見守り・声かけ体制を維持し、転倒事故や体調急変時の応急手当マニュアルの徹底、本部への追加資機材要請・状況報告を継続している。	現場班（避難誘導・保健師）	並木一丁目25番地周辺の現場班より『資機材は依然未到着で、手持ちライトや誘導灯のみで夜間の健康観察・安全指導・見守りを継続している。住民の不安や疲労が強く、転倒や体調急変リスクへの注意喚起と住民同士の見守り強化を継続。追加資機材の到着状況は本部と随時共有し、応急手当マニュアルの再確認も実施中』との報告。	追加資機材（照明・毛布・飲料水等）は道路冠水・渋滞で依然未到着。現場待機者は高齢者・体調不良者が中心。夜間の冷え込みと暗さで住民の不安がさらに高まっている。	淀川本流から約350mの低地。住宅密集地で標高差が小さく、南側の窪地に水が集まりやすい。都市型排水能力を超えた状態が長期化し、夜間の気温低下で体調悪化リスクが高まる。	資機材枯渇・夜間対応下での現場主導による応急対応・住民安全確保・本部連携の実践訓練。住民不安の把握・安全対策・見守り体制の強化を狙う。	資機材枯渇時の応急対応（手持ちライト・誘導灯活用）、住民同士の見守り体制強化、夜間巡回・健康観察・安全指導、転倒・体調急変時の応急手当マニュアル徹底、本部への情報共有・追加要請。	資機材枯渇状況・住民不安の本部報告、手持ち資機材の最大活用、住民同士の見守り・声かけ体制強化、夜間移動制限・転倒防止指導、応急手当マニュアルの再周知・徹底、追加資機材到着までの応急体制維持、本部との連携強化。	資機材枯渇による夜間対応・健康観察の困難、応急対応の工夫が必要な現場での混乱、住民不安・パニックの拡大、資機材到着遅延による対応遅れ、現場と本部間の情報伝達遅延	道路は膝程度の冠水継続、床下10〜15cmの浸水、下水逆流・悪臭あり	床下浸水長期化・下水逆流・健康被害拡大・避難所過密・現場待機者健康管理・夜間対応・資機材枯渇	床下浸水と下水逆流・悪臭が継続し、避難所・サテライト避難所ともに満員状態。現場で待機中の高齢者・体調不良者の健康観察と保温・安全確保が夜間も課題。照明や毛布などの資機材が完全に枯渇し、住民の不安や夜間の転倒事故・体調急変リスクがさらに増大している。住民同士の見守り・声かけ体制が重要。	夜間照明・毛布等の資機材管理・追加手配、手持ち資機材の応急活用、住民同士の見守り・声かけ体制強化、現場待機者の健康・安全管理体制強化、情報共有体制の強化、要配慮者名簿の活用と優先搬送、夜間・寒冷下対応マニュアルの徹底	平成25年台風18号時、同地域で避難所過密・現場待機者発生・夜間対応困難・照明・毛布不足による健康被害拡大が報告された。夜間の体調急変や搬送遅延、資機材不足時の応急対応の遅れが課題となった。	['床下浸水継続による家財・ガス設備・給湯器被害', '下水逆流による衛生被害・健康被害（体調不良者発生）', '生活物資不足による住民の体調不良・不安拡大', '救急搬送困難による重症化リスク', '避難所過密・受け入れ遅延', '医療資源逼迫による健康被害拡大', '現場待機者の健康・安全リスク', '夜間・寒冷下での体調悪化', '資機材（照明・毛布等）枯渇による夜間対応困難']	['冠水長期化による孤立世帯の発生', '感染症・生活環境悪化による体調不良者増加', '支援班・救助班・医療班・救急隊の現場到着遅延', '臨時避難所運用・物資配布の遅延・混乱', '夜間・停電・寒冷下での現場対応困難']
		1-33	350	発災156分後	照明・毛布等の資機材枯渇が継続し、夜間の健康観察・安全指導・見守りを手持ちライトや誘導灯のみで継続。住民同士の見守り・声かけ体制を維持し、転倒事故や体調急変時の応急手当マニュアルの徹底、本部への追加資機材要請・状況報告を継続している。	現場班（避難誘導・保健師）	並木一丁目25番地周辺の現場班より『資機材は依然未到着で、手持ちライトや誘導灯のみで夜間の健康観察・安全指導・見守りを継続している。住民の不安や疲労が強く、転倒や体調急変リスクへの注意喚起と住民同士の見守り強化を継続。追加資機材の到着状況は本部と随時共有し、応急手当マニュアルの再確認も実施中』との報告。	追加資機材（照明・毛布・飲料水等）は道路冠水・渋滞で依然未到着。現場待機者は高齢者・体調不良者が中心。夜間の冷え込みと暗さで住民の不安がさらに高まっている。	淀川本流から約350mの低地。住宅密集地で標高差が小さく、南側の窪地に水が集まりやすい。都市型排水能力を超えた状態が長期化し、夜間の気温低下で体調悪化リスクが高まる。	資機材枯渇・夜間対応下での現場主導による応急対応・住民安全確保・本部連携の実践訓練。住民不安の把握・安全対策・見守り体制の強化を狙う。	資機材枯渇時の応急対応（手持ちライト・誘導灯活用）、住民同士の見守り体制強化、夜間巡回・健康観察・安全指導、転倒・体調急変時の応急手当マニュアル徹底、本部への情報共有・追加要請。	資機材枯渇状況・住民不安の本部報告、手持ち資機材の最大活用、住民同士の見守り・声かけ体制強化、夜間移動制限・転倒防止指導、応急手当マニュアルの再周知・徹底、追加資機材到着までの応急体制維持、本部との連携強化。	資機材枯渇による夜間対応・健康観察の困難、応急対応の工夫が必要な現場での混乱、住民不安・パニックの拡大、資機材到着遅延による対応遅れ、現場と本部間の情報伝達遅延	道路は膝程度の冠水継続、床下10〜15cmの浸水、下水逆流・悪臭あり	床下浸水長期化・下水逆流・健康被害拡大・避難所過密・現場待機者健康管理・夜間対応・資機材枯渇	床下浸水と下水逆流・悪臭が継続し、避難所・サテライト避難所ともに満員状態。現場で待機中の高齢者・体調不良者の健康観察と保温・安全確保が夜間も課題。照明や毛布などの資機材が完全に枯渇し、住民の不安や夜間の転倒事故・体調急変リスクがさらに増大している。住民同士の見守り・声かけ体制が重要。	夜間照明・毛布等の資機材管理・追加手配、手持ち資機材の応急活用、住民同士の見守り・声かけ体制強化、現場待機者の健康・安全管理体制強化、情報共有体制の強化、要配慮者名簿の活用と優先搬送、夜間・寒冷下対応マニュアルの徹底	平成25年台風18号時、同地域で避難所過密・現場待機者発生・夜間対応困難・照明・毛布不足による健康被害拡大が報告された。夜間の体調急変や搬送遅延、資機材不足時の応急対応の遅れが課題となった。	['床下浸水継続による家財・ガス設備・給湯器被害', '下水逆流による衛生被害・健康被害（体調不良者発生）', '生活物資不足による住民の体調不良・不安拡大', '救急搬送困難による重症化リスク', '避難所過密・受け入れ遅延', '医療資源逼迫による健康被害拡大', '現場待機者の健康・安全リスク', '夜間・寒冷下での体調悪化', '資機材（照明・毛布等）枯渇による夜間対応困難']	['冠水長期化による孤立世帯の発生', '感染症・生活環境悪化による体調不良者増加', '支援班・救助班・医療班・救急隊の現場到着遅延', '臨時避難所運用・物資配布の遅延・混乱', '夜間・停電・寒冷下での現場対応困難']
		1-34	350	発災163分後	照明・毛布等の資機材枯渇状態が継続し、夜間の健康観察・見守り・安全指導を手持ちライトや誘導灯のみで実施。住民同士の見守り体制を維持しつつ、転倒・体調急変時の応急手当マニュアルの再徹底と夜間移動制限・安全指導の強化を継続。本部との追加資機材要請・状況報告も継続中。	現場班（避難誘導・保健師）	『資機材は依然未到着で、手持ちライトや誘導灯のみで夜間の健康観察・安全指導・見守りを継続しています。住民の不安や疲労が強く、転倒や体調急変リスクへの注意喚起と住民同士の見守り強化を継続。追加資機材の到着状況は本部と随時共有し、応急手当マニュアルの再確認も実施中です』との報告。	追加資機材（照明・毛布・飲料水等）は道路冠水・渋滞で依然未到着。現場待機者は高齢者・体調不良者が中心。夜間の冷え込みと暗さで住民の不安がさらに高まっている。	淀川本流から約350mの低地。住宅密集地で標高差が小さく、南側の窪地に水が集まりやすい。都市型排水能力を超えた状態が長期化し、夜間の気温低下で体調悪化リスクが高まる。	資機材枯渇・夜間対応下での現場主導による応急対応・住民安全確保・本部連携の実践訓練。住民不安の把握・安全対策・見守り体制の強化を狙う。	資機材枯渇時の応急対応（手持ちライト・誘導灯活用）、住民同士の見守り体制強化、夜間巡回・健康観察・安全指導、転倒・体調急変時の応急手当マニュアル徹底、本部への情報共有・追加要請。	資機材枯渇状況・住民不安の本部報告、手持ち資機材の最大活用、住民同士の見守り・声かけ体制強化、夜間移動制限・転倒防止指導、応急手当マニュアルの再周知・徹底、追加資機材到着までの応急体制維持、本部との連携強化。	資機材枯渇による夜間対応・健康観察の困難、応急対応の工夫が必要な現場での混乱、住民不安・パニックの拡大、資機材到着遅延による対応遅れ、現場と本部間の情報伝達遅延	道路は膝程度の冠水継続、床下10〜15cmの浸水、下水逆流・悪臭あり	床下浸水長期化・下水逆流・健康被害拡大・避難所過密・現場待機者健康管理・夜間対応・資機材枯渇	床下浸水と下水逆流・悪臭が継続し、避難所・サテライト避難所ともに満員状態。現場で待機中の高齢者・体調不良者の健康観察と保温・安全確保が夜間も課題。照明や毛布などの資機材が完全に枯渇し、住民の不安や夜間の転倒事故・体調急変リスクがさらに増大している。住民同士の見守り・声かけ体制が重要。	夜間照明・毛布等の資機材管理・追加手配、手持ち資機材の応急活用、住民同士の見守り・声かけ体制強化、現場待機者の健康・安全管理体制強化、情報共有体制の強化、要配慮者名簿の活用と優先搬送、夜間・寒冷下対応マニュアルの徹底	平成25年台風18号時、同地域で避難所過密・現場待機者発生・夜間対応困難・照明・毛布不足による健康被害拡大が報告された。夜間の体調急変や搬送遅延、資機材不足時の応急対応の遅れが課題となった。	['床下浸水継続による家財・ガス設備・給湯器被害', '下水逆流による衛生被害・健康被害（体調不良者発生）', '生活物資不足による住民の体調不良・不安拡大', '救急搬送困難による重症化リスク', '避難所過密・受け入れ遅延', '医療資源逼迫による健康被害拡大', '現場待機者の健康・安全リスク', '夜間・寒冷下での体調悪化', '資機材（照明・毛布等）枯渇による夜間対応困難']	['冠水長期化による孤立世帯の発生', '感染症・生活環境悪化による体調不良者増加', '支援班・救助班・医療班・救急隊の現場到着遅延', '臨時避難所運用・物資配布の遅延・混乱', '夜間・停電・寒冷下での現場対応困難']
		1-35	350	発災167分後	照明・毛布等の資機材枯渇が続く中、夜間の健康観察・見守り・安全指導を手持ちライトや誘導灯のみで継続。住民同士の見守り体制を維持し、転倒事故や体調急変時の応急手当マニュアルの再徹底、本部への追加資機材要請・状況報告を継続している。	現場班（避難誘導・保健師）	並木一丁目25番地周辺の現場班より『資機材は依然未到着で、手持ちライトや誘導灯のみで夜間の健康観察・安全指導・見守りを継続している。住民の不安や疲労が強く、転倒や体調急変リスクへの注意喚起と住民同士の見守り強化を継続。追加資機材の到着状況は本部と随時共有し、応急手当マニュアルの再確認も実施中』との報告。	追加資機材（照明・毛布・飲料水等）は道路冠水・渋滞で依然未到着。現場待機者は高齢者・体調不良者が中心。夜間の冷え込みと暗さで住民の不安がさらに高まっている。	淀川本流から約350mの低地。住宅密集地で標高差が小さく、南側の窪地に水が集まりやすい。都市型排水能力を超えた状態が長期化し、夜間の気温低下で体調悪化リスクが高まる。	資機材枯渇・夜間対応下での現場主導による応急対応・住民安全確保・本部連携の実践訓練。住民不安の把握・安全対策・見守り体制の強化を狙う。	資機材枯渇時の応急対応（手持ちライト・誘導灯活用）、住民同士の見守り体制強化、夜間巡回・健康観察・安全指導、転倒・体調急変時の応急手当マニュアル徹底、本部への情報共有・追加要請。	資機材枯渇状況・住民不安の本部報告、手持ち資機材の最大活用、住民同士の見守り・声かけ体制強化、夜間移動制限・転倒防止指導、応急手当マニュアルの再周知・徹底、追加資機材到着までの応急体制維持、本部との連携強化。	資機材枯渇による夜間対応・健康観察の困難、応急対応の工夫が必要な現場での混乱、住民不安・パニックの拡大、資機材到着遅延による対応遅れ、現場と本部間の情報伝達遅延	道路は膝程度の冠水継続、床下10〜15cmの浸水、下水逆流・悪臭あり	床下浸水長期化・下水逆流・健康被害拡大・避難所過密・現場待機者健康管理・夜間対応・資機材枯渇	床下浸水と下水逆流・悪臭が継続し、避難所・サテライト避難所ともに満員状態。現場で待機中の高齢者・体調不良者の健康観察と保温・安全確保が夜間も課題。照明や毛布などの資機材が完全に枯渇し、住民の不安や夜間の転倒事故・体調急変リスクがさらに増大している。住民同士の見守り・声かけ体制が重要。	夜間照明・毛布等の資機材管理・追加手配、手持ち資機材の応急活用、住民同士の見守り・声かけ体制強化、現場待機者の健康・安全管理体制強化、情報共有体制の強化、要配慮者名簿の活用と優先搬送、夜間・寒冷下対応マニュアルの徹底	平成25年台風18号時、同地域で避難所過密・現場待機者発生・夜間対応困難・照明・毛布不足による健康被害拡大が報告された。夜間の体調急変や搬送遅延、資機材不足時の応急対応の遅れが課題となった。	['床下浸水継続による家財・ガス設備・給湯器被害', '下水逆流による衛生被害・健康被害（体調不良者発生）', '生活物資不足による住民の体調不良・不安拡大', '救急搬送困難による重症化リスク', '避難所過密・受け入れ遅延', '医療資源逼迫による健康被害拡大', '現場待機者の健康・安全リスク', '夜間・寒冷下での体調悪化', '資機材（照明・毛布等）枯渇による夜間対応困難']	['冠水長期化による孤立世帯の発生', '感染症・生活環境悪化による体調不良者増加', '支援班・救助班・医療班・救急隊の現場到着遅延', '臨時避難所運用・物資配布の遅延・混乱', '夜間・停電・寒冷下での現場対応困難']
		1-36	350	発災172分後	照明・毛布等の資機材枯渇状態が継続し、夜間の健康観察・見守り・安全指導を手持ちライトや誘導灯のみで実施。住民同士の見守り体制を維持しつつ、転倒・体調急変時の応急手当マニュアルの再徹底と夜間移動制限・安全指導の強化を継続。本部との追加資機材要請・状況報告も継続中。	現場班（避難誘導・保健師）	並木一丁目25番地周辺の現場班より『資機材は依然未到着で、手持ちライトや誘導灯のみで夜間の健康観察・安全指導・見守りを継続しています。住民の不安や疲労が強く、転倒や体調急変リスクへの注意喚起と住民同士の見守り強化を継続。追加資機材の到着状況は本部と随時共有し、応急手当マニュアルの再確認も実施中です』との報告。	追加資機材（照明・毛布・飲料水等）は道路冠水・渋滞で依然未到着。現場待機者は高齢者・体調不良者が中心。夜間の冷え込みと暗さで住民の不安がさらに高まっている。	淀川本流から約350mの低地。住宅密集地で標高差が小さく、南側の窪地に水が集まりやすい。都市型排水能力を超えた状態が長期化し、夜間の気温低下で体調悪化リスクが高まる。	資機材枯渇・夜間対応下での現場主導による応急対応・住民安全確保・本部連携の実践訓練。住民不安の把握・安全対策・見守り体制の強化を狙う。	資機材枯渇時の応急対応（手持ちライト・誘導灯活用）、住民同士の見守り体制強化、夜間巡回・健康観察・安全指導、転倒・体調急変時の応急手当マニュアル徹底、本部への情報共有・追加要請。	資機材枯渇状況・住民不安の本部報告、手持ち資機材の最大活用、住民同士の見守り・声かけ体制強化、夜間移動制限・転倒防止指導、応急手当マニュアルの再周知・徹底、追加資機材到着までの応急体制維持、本部との連携強化。	資機材枯渇による夜間対応・健康観察の困難、応急対応の工夫が必要な現場での混乱、住民不安・パニックの拡大、資機材到着遅延による対応遅れ、現場と本部間の情報伝達遅延	道路は膝程度の冠水継続、床下10〜15cmの浸水、下水逆流・悪臭あり	床下浸水長期化・下水逆流・健康被害拡大・避難所過密・現場待機者健康管理・夜間対応・資機材枯渇	床下浸水と下水逆流・悪臭が継続し、避難所・サテライト避難所ともに満員状態。現場で待機中の高齢者・体調不良者の健康観察と保温・安全確保が夜間も課題。照明や毛布などの資機材が完全に枯渇し、住民の不安や夜間の転倒事故・体調急変リスクがさらに増大している。住民同士の見守り・声かけ体制が重要。	夜間照明・毛布等の資機材管理・追加手配、手持ち資機材の応急活用、住民同士の見守り・声かけ体制強化、現場待機者の健康・安全管理体制強化、情報共有体制の強化、要配慮者名簿の活用と優先搬送、夜間・寒冷下対応マニュアルの徹底	平成25年台風18号時、同地域で避難所過密・現場待機者発生・夜間対応困難・照明・毛布不足による健康被害拡大が報告された。夜間の体調急変や搬送遅延、資機材不足時の応急対応の遅れが課題となった。	['床下浸水継続による家財・ガス設備・給湯器被害', '下水逆流による衛生被害・健康被害（体調不良者発生）', '生活物資不足による住民の体調不良・不安拡大', '救急搬送困難による重症化リスク', '避難所過密・受け入れ遅延', '医療資源逼迫による健康被害拡大', '現場待機者の健康・安全リスク', '夜間・寒冷下での体調悪化', '資機材（照明・毛布等）枯渇による夜間対応困難']	['冠水長期化による孤立世帯の発生', '感染症・生活環境悪化による体調不良者増加', '支援班・救助班・医療班・救急隊の現場到着遅延', '臨時避難所運用・物資配布の遅延・混乱', '夜間・停電・寒冷下での現場対応困難']
		1-37	350	発災179分後	照明・毛布等の資機材枯渇状態が継続し、夜間の健康観察・見守り・安全指導を手持ちライトや誘導灯のみで実施。住民同士の見守り体制を維持しつつ、転倒・体調急変時の応急手当マニュアルの再徹底と夜間移動制限・安全指導の強化を継続。本部との追加資機材要請・状況報告も継続中。	現場班（避難誘導・保健師）	並木一丁目25番地周辺の現場班より『資機材は依然未到着で、手持ちライトや誘導灯のみで夜間の健康観察・安全指導・見守りを継続しています。住民の不安や疲労が強く、転倒や体調急変リスクへの注意喚起と住民同士の見守り強化を継続。追加資機材の到着状況は本部と随時共有し、応急手当マニュアルの再確認も実施中です』との報告。	追加資機材（照明・毛布・飲料水等）は道路冠水・渋滞で依然未到着。現場待機者は高齢者・体調不良者が中心。夜間の冷え込みと暗さで住民の不安がさらに高まっている。	淀川本流から約350mの低地。住宅密集地で標高差が小さく、南側の窪地に水が集まりやすい。都市型排水能力を超えた状態が長期化し、夜間の気温低下で体調悪化リスクが高まる。	資機材枯渇・夜間対応下での現場主導による応急対応・住民安全確保・本部連携の実践訓練。住民不安の把握・安全対策・見守り体制の強化を狙う。	資機材枯渇時の応急対応（手持ちライト・誘導灯活用）、住民同士の見守り体制強化、夜間巡回・健康観察・安全指導、転倒・体調急変時の応急手当マニュアル徹底、本部への情報共有・追加要請。	資機材枯渇状況・住民不安の本部報告、手持ち資機材の最大活用、住民同士の見守り・声かけ体制強化、夜間移動制限・転倒防止指導、応急手当マニュアルの再周知・徹底、追加資機材到着までの応急体制維持、本部との連携強化。	資機材枯渇による夜間対応・健康観察の困難、応急対応の工夫が必要な現場での混乱、住民不安・パニックの拡大、資機材到着遅延による対応遅れ、現場と本部間の情報伝達遅延	道路は膝程度の冠水継続、床下10〜15cmの浸水、下水逆流・悪臭あり	床下浸水長期化・下水逆流・健康被害拡大・避難所過密・現場待機者健康管理・夜間対応・資機材枯渇	床下浸水と下水逆流・悪臭が継続し、避難所・サテライト避難所ともに満員状態。現場で待機中の高齢者・体調不良者の健康観察と保温・安全確保が夜間も課題。照明や毛布などの資機材が完全に枯渇し、住民の不安や夜間の転倒事故・体調急変リスクがさらに増大している。住民同士の見守り・声かけ体制が重要。	夜間照明・毛布等の資機材管理・追加手配、手持ち資機材の応急活用、住民同士の見守り・声かけ体制強化、現場待機者の健康・安全管理体制強化、情報共有体制の強化、要配慮者名簿の活用と優先搬送、夜間・寒冷下対応マニュアルの徹底	平成25年台風18号時、同地域で避難所過密・現場待機者発生・夜間対応困難・照明・毛布不足による健康被害拡大が報告された。夜間の体調急変や搬送遅延、資機材不足時の応急対応の遅れが課題となった。	['床下浸水継続による家財・ガス設備・給湯器被害', '下水逆流による衛生被害・健康被害（体調不良者発生）', '生活物資不足による住民の体調不良・不安拡大', '救急搬送困難による重症化リスク', '避難所過密・受け入れ遅延', '医療資源逼迫による健康被害拡大', '現場待機者の健康・安全リスク', '夜間・寒冷下での体調悪化', '資機材（照明・毛布等）枯渇による夜間対応困難']	['冠水長期化による孤立世帯の発生', '感染症・生活環境悪化による体調不良者増加', '支援班・救助班・医療班・救急隊の現場到着遅延', '臨時避難所運用・物資配布の遅延・混乱', '夜間・停電・寒冷下での現場対応困難']
		1-38	350	発災183分後	照明・毛布等の資機材枯渇状態が継続し、夜間の健康観察・見守り・安全指導を手持ちライトや誘導灯のみで実施。住民同士の見守り体制を維持しつつ、転倒・体調急変時の応急手当マニュアルの再徹底と夜間移動制限・安全指導の強化を継続。本部との追加資機材要請・状況報告も継続中。	現場班（避難誘導・保健師）	並木一丁目25番地周辺の現場班より『資機材は依然未到着で、手持ちライトや誘導灯のみで夜間の健康観察・安全指導・見守りを継続しています。住民の不安や疲労が強く、転倒や体調急変リスクへの注意喚起と住民同士の見守り強化を継続。追加資機材の到着状況は本部と随時共有し、応急手当マニュアルの再確認も実施中です』との報告。	追加資機材（照明・毛布・飲料水等）は道路冠水・渋滞で依然未到着。現場待機者は高齢者・体調不良者が中心。夜間の冷え込みと暗さで住民の不安がさらに高まっている。	淀川本流から約350mの低地。住宅密集地で標高差が小さく、南側の窪地に水が集まりやすい。都市型排水能力を超えた状態が長期化し、夜間の気温低下で体調悪化リスクが高まる。	資機材枯渇・夜間対応下での現場主導による応急対応・住民安全確保・本部連携の実践訓練。住民不安の把握・安全対策・見守り体制の強化を狙う。	資機材枯渇時の応急対応（手持ちライト・誘導灯活用）、住民同士の見守り体制強化、夜間巡回・健康観察・安全指導、転倒・体調急変時の応急手当マニュアル徹底、本部への情報共有・追加要請。	資機材枯渇状況・住民不安の本部報告、手持ち資機材の最大活用、住民同士の見守り・声かけ体制強化、夜間移動制限・転倒防止指導、応急手当マニュアルの再周知・徹底、追加資機材到着までの応急体制維持、本部との連携強化。	資機材枯渇による夜間対応・健康観察の困難、応急対応の工夫が必要な現場での混乱、住民不安・パニックの拡大、資機材到着遅延による対応遅れ、現場と本部間の情報伝達遅延	道路は膝程度の冠水継続、床下10〜15cmの浸水、下水逆流・悪臭あり	床下浸水長期化・下水逆流・健康被害拡大・避難所過密・現場待機者健康管理・夜間対応・資機材枯渇	床下浸水と下水逆流・悪臭が継続し、避難所・サテライト避難所ともに満員状態。現場で待機中の高齢者・体調不良者の健康観察と保温・安全確保が夜間も課題。照明や毛布などの資機材が完全に枯渇し、住民の不安や夜間の転倒事故・体調急変リスクがさらに増大している。住民同士の見守り・声かけ体制が重要。	夜間照明・毛布等の資機材管理・追加手配、手持ち資機材の応急活用、住民同士の見守り・声かけ体制強化、現場待機者の健康・安全管理体制強化、情報共有体制の強化、要配慮者名簿の活用と優先搬送、夜間・寒冷下対応マニュアルの徹底	平成25年台風18号時、同地域で避難所過密・現場待機者発生・夜間対応困難・照明・毛布不足による健康被害拡大が報告された。夜間の体調急変や搬送遅延、資機材不足時の応急対応の遅れが課題となった。	['床下浸水継続による家財・ガス設備・給湯器被害', '下水逆流による衛生被害・健康被害（体調不良者発生）', '生活物資不足による住民の体調不良・不安拡大', '救急搬送困難による重症化リスク', '避難所過密・受け入れ遅延', '医療資源逼迫による健康被害拡大', '現場待機者の健康・安全リスク', '夜間・寒冷下での体調悪化', '資機材（照明・毛布等）枯渇による夜間対応困難']	['冠水長期化による孤立世帯の発生', '感染症・生活環境悪化による体調不良者増加', '支援班・救助班・医療班・救急隊の現場到着遅延', '臨時避難所運用・物資配布の遅延・混乱', '夜間・停電・寒冷下での現場対応困難']

## Sheet: 枚方市船橋本町一丁目874
評価	備考	シナリオID	(推測)災害の中心からの距離[m]	イベント発生時刻	付与内容	情報源	状況付与内容	補足情報	地形情報や想定想定される被害の特徴	訓練効果・狙い	判断ポイント	期待される対応行動	想定される課題	水位状況	被害の種類	詳細な被害状況	想定される対策	類似の過去事例(あれば記載)	直近のリスク	二次的なリスク
		1-3	900	発災5分後					淀川本流から約900m離れており、周辺は住宅地で若干の高台となっている。標高は中心部よりやや高く、広範囲の洪水被害は発生しにくいが、今後の増水状況によっては低地部分で冠水の可能性もある。					現時点で目立った増水や冠水は確認されていない	被害なし	現時点では道路や住宅への浸水・冠水は確認されていない。住民からの被害通報も入っていない。	今後の増水に備えた情報収集と警戒態勢の維持、周辺住民への注意喚起、要配慮者への状況確認。	平成25年台風18号時にも、淀川本流から離れた高台地域では大きな冠水被害は報告されていない。	[]	[]
		1-4	900	発災9分後					淀川本流から約900m離れており、周辺は住宅地で若干の高台となっている。標高は中心部よりやや高く、広範囲の洪水被害は発生しにくいが、今後の増水状況によっては低地部分で冠水の可能性もある。					現時点で目立った増水や冠水は確認されていない	被害なし	現時点では道路や住宅への浸水・冠水は確認されていない。住民からの被害通報も入っていない。	今後の増水に備えた情報収集と警戒態勢の維持、周辺住民への注意喚起、要配慮者への状況確認。	平成25年台風18号時にも、淀川本流から離れた高台地域では大きな冠水被害は報告されていない。	[]	[]
		1-5	900	発災12分後					淀川本流から約900m離れており、周辺は住宅地で若干の高台となっている。標高は中心部よりやや高く、広範囲の洪水被害は発生しにくいが、今後の増水状況によっては低地部分で冠水の可能性もある。					現時点で目立った増水や冠水は確認されていない	被害なし	現時点では道路や住宅への浸水・冠水は確認されていない。住民からの被害通報も入っていない。	今後の増水に備えた情報収集と警戒態勢の維持、周辺住民への注意喚起、要配慮者への状況確認。	平成25年台風18号時にも、淀川本流から離れた高台地域では大きな冠水被害は報告されていない。	[]	[]
		1-6	900	発災16分後					淀川本流から約900m離れており、周辺は住宅地で若干の高台となっている。標高は中心部よりやや高く、広範囲の洪水被害は発生しにくいが、今後の増水状況によっては低地部分で冠水の可能性もある。					現時点で目立った増水や冠水は確認されていない	被害なし	現時点では道路や住宅への浸水・冠水は確認されていない。住民からの被害通報も入っていない。	今後の増水に備えた情報収集と警戒態勢の維持、周辺住民への注意喚起、要配慮者への状況確認。	平成25年台風18号時にも、淀川本流から離れた高台地域では大きな冠水被害は報告されていない。	[]	[]
		1-7	900	発災23分後					淀川本流から約900m離れており、周辺は住宅地で若干の高台となっている。標高は中心部よりやや高く、広範囲の洪水被害は発生しにくいが、今後の増水状況によっては低地部分で冠水の可能性もある。					現時点で目立った増水や冠水は確認されていない	被害なし	道路や住宅への浸水・冠水は引き続き確認されていない。住民からの被害通報もなく、通常通りの生活が維持されている。	今後の増水や下流域の氾濫情報に備えた情報収集と警戒態勢の維持。周辺住民への注意喚起と、要配慮者への状況確認を継続する。引き続き避難所開設準備や土のう配布体制を確認しておく。	平成25年台風18号時にも、淀川本流から離れた高台地域では大きな冠水被害は報告されていない。	[]	[]
		1-8	900	発災27分後					淀川本流から約900m離れており、周辺は住宅地でやや高台。標高は中心部より高く、広範囲の洪水被害は発生しにくいが、今後の増水状況によっては局所的な低地で冠水の可能性もある。					現時点で目立った増水や冠水は確認されていない	被害なし	道路や住宅への浸水・冠水は引き続き確認されていない。住民からの被害通報もなく、通常通りの生活が維持されている。	今後の増水や下流域の氾濫情報に備えた情報収集と警戒態勢の維持。周辺住民への注意喚起と、要配慮者への状況確認を継続。避難所開設準備や土のう配布体制の再確認も行う。	平成25年台風18号時にも、淀川本流から離れた高台地域では大きな冠水被害は報告されていない。	[]	[]
		1-9	900	発災33分後					淀川本流から約900m離れており、周辺は住宅地でやや高台。標高は中心部より高く、広範囲の洪水被害は発生しにくいが、今後の増水状況によっては局所的な低地で冠水の可能性もある。					現時点で目立った増水や冠水は確認されていない	被害なし	道路や住宅への浸水・冠水は引き続き確認されていない。住民からの被害通報もなく、通常通りの生活が維持されている。	今後の増水や下流域の氾濫情報に備えた情報収集と警戒態勢の維持。周辺住民への注意喚起と、要配慮者への状況確認を継続。避難所開設準備や土のう配布体制の再確認も行う。	平成25年台風18号時にも、淀川本流から離れた高台地域では大きな冠水被害は報告されていない。	[]	[]
		1-10	900	発災38分後					淀川本流から約900m離れており、周辺は住宅地でやや高台。標高は中心部より高く、広範囲の洪水被害は発生しにくいが、今後の増水状況によっては局所的な低地で冠水の可能性もある。					現時点で目立った増水や冠水は確認されていない	被害なし	道路や住宅への浸水・冠水は引き続き確認されていない。住民からの被害通報もなく、通常通りの生活が維持されている。	今後の増水や下流域の氾濫情報に備えた情報収集と警戒態勢の維持。周辺住民への注意喚起と、要配慮者への状況確認を継続。避難所開設準備や土のう配布体制の再確認も行う。	平成25年台風18号時にも、淀川本流から離れた高台地域では大きな冠水被害は報告されていない。	[]	[]
		1-11	900	発災43分後					淀川本流から約900m離れており、周辺は住宅地でやや高台。標高は中心部より高く、広範囲の洪水被害は発生しにくいが、今後の増水状況によっては局所的な低地で冠水の可能性もある。					現時点で目立った増水や冠水は確認されていない	被害なし	道路や住宅への浸水・冠水は引き続き確認されていない。住民からの被害通報もなく、通常通りの生活が維持されている。	今後の増水や下流域の氾濫情報に備えた情報収集と警戒態勢の維持。周辺住民への注意喚起と、要配慮者への状況確認を継続。避難所開設準備や土のう配布体制の再確認も行う。	平成25年台風18号時にも、淀川本流から離れた高台地域では大きな冠水被害は報告されていない。	[]	[]
		1-12	900	発災48分後					淀川本流から約900m離れており、周辺は住宅地でやや高台。標高は中心部より高く、広範囲の洪水被害は発生しにくいが、今後の増水状況によっては局所的な低地で冠水の可能性もある。					現時点で目立った増水や冠水は確認されていない	被害なし	道路や住宅への浸水・冠水は引き続き確認されていない。住民からの被害通報もなく、通常通りの生活が維持されている。	今後の増水や下流域の氾濫情報に備えた情報収集と警戒態勢の維持。周辺住民への注意喚起と、要配慮者への状況確認を継続。避難所開設準備や土のう配布体制の再確認も行う。	平成25年台風18号時にも、淀川本流から離れた高台地域では大きな冠水被害は報告されていない。	[]	[]
		1-13	900	発災52分後					淀川本流から約900m離れており、周辺は住宅地でやや高台。標高は中心部より高いため、広範囲の洪水被害は発生しにくい。今後の増水状況によっては局所的な低地で冠水の可能性もあるが、現時点では被害は発生していない。					現時点で目立った増水や冠水は確認されていない	被害なし	道路や住宅への浸水・冠水は引き続き確認されていない。住民からの被害通報もなく、通常通りの生活が維持されている。	今後の増水や下流域の氾濫情報に備えた情報収集と警戒態勢の維持。周辺住民への注意喚起と、要配慮者への状況確認を継続。避難所開設準備や土のう配布体制の再確認も行う。	平成25年台風18号時にも、淀川本流から離れた高台地域では大きな冠水被害は報告されていない。	[]	[]
		1-14	900	発災58分後					淀川本流から約900m離れており、周辺は住宅地でやや高台。標高は中心部より高く、広範囲の洪水被害は発生しにくい。今後の増水状況によっては局所的な低地で冠水の可能性もあるが、現時点では被害は発生していない。					現時点で目立った増水や冠水は確認されていない	被害なし	道路や住宅への浸水・冠水は引き続き確認されていない。住民からの被害通報もなく、通常通りの生活が維持されている。	今後の増水や下流域の氾濫情報に備えた情報収集と警戒態勢の維持。周辺住民への注意喚起と、要配慮者への状況確認を継続。避難所開設準備や土のう配布体制の再確認も行う。	平成25年台風18号時にも、淀川本流から離れた高台地域では大きな冠水被害は報告されていない。	[]	[]
		1-15	900	発災65分後					淀川本流から約900m離れており、周辺は住宅地でやや高台。標高は中心部より高く、広範囲の洪水被害は発生しにくい。今後の増水状況によっては局所的な低地で冠水の可能性もあるが、現時点では被害は発生していない。					現時点で目立った増水や冠水は確認されていない	被害なし	道路や住宅への浸水・冠水は引き続き確認されていない。住民からの被害通報もなく、通常通りの生活が維持されている。	今後の増水や下流域の氾濫情報に備えた情報収集と警戒態勢の維持。周辺住民への注意喚起と、要配慮者への状況確認を継続。避難所開設準備や土のう配布体制の再確認も行う。	平成25年台風18号時にも、淀川本流から離れた高台地域では大きな冠水被害は報告されていない。	[]	[]
		1-16	900	発災66分後					淀川本流から約900m離れており、周辺は住宅地でやや高台。標高は中心部より高く、広範囲の洪水被害は発生しにくいが、今後の増水状況によっては局所的な低地で冠水の可能性もある。					現時点で目立った増水や冠水は確認されていない	被害なし	道路や住宅への浸水・冠水は引き続き確認されていない。住民からの被害通報もなく、通常通りの生活が維持されている。	今後の増水や下流域の氾濫情報に備えた情報収集と警戒態勢の維持。周辺住民への注意喚起と、要配慮者への状況確認を継続。避難所開設準備や土のう配布体制の再確認も行う。	平成25年台風18号時にも、淀川本流から離れた高台地域では大きな冠水被害は報告されていない。	[]	[]
		1-17	900	発災71分後					淀川本流から約900m離れており、周辺は住宅地でやや高台。標高は中心部より高く、広範囲の洪水被害は発生しにくい。局所的な低地で一時的な冠水の可能性はあるが、現段階では顕著な被害は出ていない。					現時点で目立った増水や冠水は確認されていない	被害なし	道路や住宅への浸水・冠水は確認されていない。住民からの被害通報もなく、通常通りの生活が維持されている。	今後の増水や下流域の氾濫情報に備えた情報収集と警戒態勢の維持。周辺住民への注意喚起と、要配慮者への状況確認を継続。避難所開設準備や土のう配布体制の再確認も行う。	平成25年台風18号時にも、淀川本流から離れた高台地域では大きな冠水被害は報告されていない。	[]	[]
		1-18	900	発災80分後					淀川本流から約900m離れており、周辺は住宅地でやや高台。標高は中心部より高く、広範囲の洪水被害は発生しにくい。局所的な低地で一時的な冠水の可能性はあるが、現段階では顕著な被害は出ていない。					現時点で目立った増水や冠水は確認されていない	被害なし	道路や住宅への浸水・冠水は確認されていない。住民からの被害通報もなく、通常通りの生活が維持されている。	今後の増水や下流域の氾濫情報に備えた情報収集と警戒態勢の維持。周辺住民への注意喚起と、要配慮者への状況確認を継続。避難所開設準備や土のう配布体制の再確認も行う。	平成25年台風18号時にも、淀川本流から離れた高台地域では大きな冠水被害は報告されていない。	[]	[]
		1-19	900	発災85分後					淀川本流から約900m離れており、周辺は住宅地でやや高台。標高は中心部より高く、広範囲の洪水被害は発生しにくい。局所的な低地で一時的な冠水の可能性はあるが、現段階では顕著な被害は出ていない。					現時点で目立った増水や冠水は確認されていない	被害なし	道路や住宅への浸水・冠水は引き続き確認されていない。住民からの被害通報もなく、通常通りの生活が維持されている。	今後の増水や下流域の氾濫情報に備えた情報収集と警戒態勢の維持。周辺住民への注意喚起と、要配慮者への状況確認を継続。避難所開設準備や土のう配布体制の再確認も行う。	平成25年台風18号時にも、淀川本流から離れた高台地域では大きな冠水被害は報告されていない。	[]	[]
		1-20	900	発災86分後					淀川本流から約900m離れており、周辺は住宅地でやや高台。標高は中心部より高く、広範囲の洪水被害は発生しにくい。局所的な低地で一時的な冠水の可能性はあるが、現段階では顕著な被害は出ていない。					現時点で目立った増水や冠水は確認されていない	被害なし	道路や住宅への浸水・冠水は引き続き確認されていない。住民からの被害通報もなく、通常通りの生活が維持されている。	今後の増水や下流域の氾濫情報に備えた情報収集と警戒態勢の維持。周辺住民への注意喚起と、要配慮者への状況確認を継続。避難所開設準備や土のう配布体制の再確認も行う。	平成25年台風18号時にも、淀川本流から離れた高台地域では大きな冠水被害は報告されていない。	[]	[]
		1-21	900	発災94分後					淀川本流から約900m離れており、周辺は住宅地でやや高台。標高は中心部より高く、広範囲の洪水被害は発生しにくい。局所的な低地で一時的な冠水の可能性もあるが、現段階では顕著な被害は出ていない。					現時点で目立った増水や冠水は確認されていない	被害なし	道路や住宅への浸水・冠水は引き続き確認されていない。住民からの被害通報もなく、通常通りの生活が維持されている。	今後の増水や下流域の氾濫情報に備えた情報収集と警戒態勢の維持。周辺住民への注意喚起と、要配慮者への状況確認を継続。避難所開設準備や土のう配布体制の再確認も行う。	平成25年台風18号時にも、淀川本流から離れた高台地域では大きな冠水被害は報告されていない。	[]	[]
		1-22	900	発災98分後					淀川本流から約900m離れており、周辺は住宅地でやや高台。標高は中心部より高く、広範囲の洪水被害は発生しにくい。局所的な低地で一時的な冠水の可能性はあるが、現段階では顕著な被害は出ていない。					現時点で目立った増水や冠水は確認されていない	被害なし	道路や住宅への浸水・冠水は引き続き確認されていない。住民からの被害通報もなく、通常通りの生活が維持されている。	今後の増水や下流域の氾濫情報に備えた情報収集と警戒態勢の維持。周辺住民への注意喚起と、要配慮者への状況確認を継続。避難所開設準備や土のう配布体制の再確認も行う。	平成25年台風18号時にも、淀川本流から離れた高台地域では大きな冠水被害は報告されていない。	[]	[]
		1-23	900	発災103分後					淀川本流から約900m離れており、周辺は住宅地でやや高台。標高は中心部より高く、広範囲の洪水被害は発生しにくい。局所的な低地で一時的な冠水の可能性はあるが、現段階では顕著な被害は出ていない。					現時点で目立った増水や冠水は確認されていない	被害なし	道路や住宅への浸水・冠水は引き続き確認されていない。住民からの被害通報もなく、通常通りの生活が維持されている。	今後の増水や下流域の氾濫情報に備えた情報収集と警戒態勢の維持。周辺住民への注意喚起と、要配慮者への状況確認を継続。避難所開設準備や土のう配布体制の再確認も行う。	平成25年台風18号時にも、淀川本流から離れた高台地域では大きな冠水被害は報告されていない。	[]	[]
		1-24	900	発災109分後					淀川本流から約900m離れており、周辺は住宅地でやや高台。標高は中心部より高く、広範囲の洪水被害は発生しにくい。局所的な低地で一時的な冠水の可能性はあるが、現段階では顕著な被害は出ていない。					現時点で目立った増水や冠水は確認されていない	被害なし	道路や住宅への浸水・冠水は引き続き確認されていない。住民からの被害通報もなく、通常通りの生活が維持されている。	今後の増水や下流域の氾濫情報に備えた情報収集と警戒態勢の維持。周辺住民への注意喚起と、要配慮者への状況確認を継続。避難所開設準備や土のう配布体制の再確認も行う。	平成25年台風18号時にも、淀川本流から離れた高台地域では大きな冠水被害は報告されていない。	[]	[]
		1-25	900	発災112分後					淀川本流から約900m離れた住宅地で、やや高台に位置する。周辺は広範囲の洪水被害が発生しにくい地形だが、局所的な低地や側溝の溢水には注意が必要。					現時点でも目立った増水や冠水は確認されていない	被害なし	道路や住宅への浸水・冠水は引き続き確認されておらず、住民からの被害通報もない。通常通りの生活が維持されている。	今後の増水や下流域の氾濫情報に引き続き注意。周辺住民への警戒情報の周知、要配慮者への定期的な状況確認、避難所開設準備や土のう配布体制の再点検を継続する。	平成25年台風18号時にも、淀川本流から離れた高台地域では大きな冠水被害は報告されていない。	[]	[]
		1-26	900	発災116分後					淀川本流から約900m離れた住宅地で、やや高台に位置する。周辺は広範囲の洪水被害が発生しにくい地形だが、局所的な低地や側溝の溢水には注意が必要。					現時点でも目立った増水や冠水は確認されていない	被害なし	道路や住宅への浸水・冠水は引き続き確認されておらず、住民からの被害通報もない。通常通りの生活が維持されている。	今後の増水や下流域の氾濫情報に引き続き注意。周辺住民への警戒情報の周知、要配慮者への定期的な状況確認、避難所開設準備や土のう配布体制の再点検を継続する。	平成25年台風18号時にも、淀川本流から離れた高台地域では大きな冠水被害は報告されていない。	[]	[]
		1-27	900	発災122分後					淀川本流から約900m離れた住宅地で、やや高台に位置する。周辺は広範囲の洪水被害が発生しにくい地形だが、局所的な低地や側溝の溢水には引き続き注意が必要。					現時点でも目立った増水や冠水は確認されていない	被害なし	道路や住宅への浸水・冠水は引き続き確認されておらず、住民からの被害通報もない。通常通りの生活が維持されている。	今後の増水や下流域の氾濫情報に引き続き注意。周辺住民への警戒情報の周知、要配慮者への定期的な状況確認、避難所開設準備や土のう配布体制の再点検を継続する。	平成25年台風18号時にも、淀川本流から離れた高台地域では大きな冠水被害は報告されていない。	[]	[]
		1-28	900	発災129分後					淀川本流から約900m離れた住宅地で、やや高台に位置する。周辺は広範囲の洪水被害が発生しにくい地形だが、局所的な低地や側溝の溢水には引き続き注意が必要。					現時点でも目立った増水や冠水は確認されていない	被害なし	道路や住宅への浸水・冠水は引き続き確認されておらず、住民からの被害通報もない。通常通りの生活が維持されている。	今後の増水や下流域の氾濫情報に引き続き注意。周辺住民への警戒情報の周知、要配慮者への定期的な状況確認、避難所開設準備や土のう配布体制の再点検を継続する。	平成25年台風18号時にも、淀川本流から離れた高台地域では大きな冠水被害は報告されていない。	[]	[]
		1-29	900	発災133分後					淀川本流から約900m離れた住宅地で、やや高台に位置する。周辺は広範囲の洪水被害が発生しにくい地形だが、局所的な低地や側溝の溢水には引き続き注意が必要。					現時点でも目立った増水や冠水は確認されていない	被害なし	道路や住宅への浸水・冠水は引き続き確認されておらず、住民からの被害通報もない。通常通りの生活が維持されている。	今後の増水や下流域の氾濫情報に引き続き注意。周辺住民への警戒情報の周知、要配慮者への定期的な状況確認、避難所開設準備や土のう配布体制の再点検を継続する。	平成25年台風18号時にも、淀川本流から離れた高台地域では大きな冠水被害は報告されていない。	[]	[]
		1-30	900	発災137分後					淀川本流から約900m離れた住宅地で、やや高台に位置する。周辺は広範囲の洪水被害が発生しにくい地形だが、局所的な低地や側溝の溢水には引き続き注意が必要。					現時点でも目立った増水や冠水は確認されていない	被害なし	道路や住宅への浸水・冠水は引き続き確認されておらず、住民からの被害通報もない。通常通りの生活が維持されている。	今後の増水や下流域の氾濫情報に引き続き注意。周辺住民への警戒情報の周知、要配慮者への定期的な状況確認、避難所開設準備や土のう配布体制の再点検を継続する。	平成25年台風18号時にも、淀川本流から離れた高台地域では大きな冠水被害は報告されていない。	[]	[]
		1-31	900	発災142分後					淀川本流から約900m離れた住宅地で、やや高台に位置する。周辺は広範囲の洪水被害が発生しにくい地形だが、局所的な低地や側溝の溢水には引き続き注意が必要。					現時点でも目立った増水や冠水は確認されていない	被害なし	道路や住宅への浸水・冠水は引き続き確認されておらず、住民からの被害通報もない。通常通りの生活が維持されている。	今後の増水や下流域の氾濫情報に引き続き注意。周辺住民への警戒情報の周知、要配慮者への定期的な状況確認、避難所開設準備や土のう配布体制の再点検を継続する。	平成25年台風18号時にも、淀川本流から離れた高台地域では大きな冠水被害は報告されていない。	[]	[]
		1-32	900	発災147分後					淀川本流から約900m離れた住宅地で、やや高台に位置する。周辺は広範囲の洪水被害が発生しにくい地形だが、局所的な低地や側溝の溢水には引き続き注意が必要。					現時点でも目立った増水や冠水は確認されていない	被害なし	道路や住宅への浸水・冠水は引き続き確認されておらず、住民からの被害通報もない。通常通りの生活が維持されている。	今後の増水や下流域の氾濫情報に引き続き注意。周辺住民への警戒情報の周知、要配慮者への定期的な状況確認、避難所開設準備や土のう配布体制の再点検を継続する。	平成25年台風18号時にも、淀川本流から離れた高台地域では大きな冠水被害は報告されていない。	[]	[]
		1-33	900	発災153分後					淀川本流から約900m離れた住宅地で、やや高台に位置する。周辺は広範囲の洪水被害が発生しにくい地形だが、局所的な低地や側溝の溢水には引き続き注意が必要。					現時点でも目立った増水や冠水は確認されていない	被害なし	道路や住宅への浸水・冠水は引き続き確認されておらず、住民からの被害通報もない。通常通りの生活が維持されている。	今後の増水や下流域の氾濫情報に引き続き注意。周辺住民への警戒情報の周知、要配慮者への定期的な状況確認、避難所開設準備や土のう配布体制の再点検を継続する。	平成25年台風18号時にも、淀川本流から離れた高台地域では大きな冠水被害は報告されていない。	[]	[]
		1-34	900	発災158分後					淀川本流から約900m離れた住宅地で、やや高台に位置する。周辺は広範囲の洪水被害が発生しにくい地形だが、局所的な低地や側溝の溢水には引き続き注意が必要。					現時点でも目立った増水や冠水は確認されていない	被害なし	道路や住宅への浸水・冠水は引き続き確認されておらず、住民からの被害通報もない。通常通りの生活が維持されている。	今後の増水や下流域の氾濫情報に引き続き注意。周辺住民への警戒情報の周知、要配慮者への定期的な状況確認、避難所開設準備や土のう配布体制の再点検を継続する。	平成25年台風18号時にも、淀川本流から離れた高台地域では大きな冠水被害は報告されていない。	[]	[]
		1-35	900	発災164分後					淀川本流から約900m離れた住宅地で、やや高台に位置する。周辺は広範囲の洪水被害が発生しにくい地形だが、局所的な低地や側溝の溢水には引き続き注意が必要。					現時点でも目立った増水や冠水は確認されていない	被害なし	道路や住宅への浸水・冠水は引き続き確認されておらず、住民からの被害通報もない。通常通りの生活が維持されている。	今後の増水や下流域の氾濫情報に引き続き注意。周辺住民への警戒情報の周知、要配慮者への定期的な状況確認、避難所開設準備や土のう配布体制の再点検を継続する。	平成25年台風18号時にも、淀川本流から離れた高台地域では大きな冠水被害は報告されていない。	[]	[]
		1-36	900	発災167分後					淀川本流から約900m離れた住宅地で、やや高台に位置する。周辺は広範囲の洪水被害が発生しにくい地形だが、局所的な低地や側溝の溢水には引き続き注意が必要。					現時点でも目立った増水や冠水は確認されていない	被害なし	道路や住宅への浸水・冠水は引き続き確認されておらず、住民からの被害通報もない。通常通りの生活が維持されている。	今後の増水や下流域の氾濫情報に引き続き注意。周辺住民への警戒情報の周知、要配慮者への定期的な状況確認、避難所開設準備や土のう配布体制の再点検を継続する。	平成25年台風18号時にも、淀川本流から離れた高台地域では大きな冠水被害は報告されていない。	[]	[]
		1-37	900	発災173分後					淀川本流から約900m離れた住宅地で、やや高台に位置する。周辺は広範囲の洪水被害が発生しにくい地形だが、局所的な低地や側溝の溢水には引き続き注意が必要。					現時点でも目立った増水や冠水は確認されていない	被害なし	道路や住宅への浸水・冠水は引き続き確認されておらず、住民からの被害通報もない。通常通りの生活が維持されている。	今後の増水や下流域の氾濫情報に引き続き注意。周辺住民への警戒情報の周知、要配慮者への定期的な状況確認、避難所開設準備や土のう配布体制の再点検を継続する。	平成25年台風18号時にも、淀川本流から離れた高台地域では大きな冠水被害は報告されていない。	[]	[]
		1-38	900	発災180分後					淀川本流から約900m離れた住宅地で、やや高台に位置する。周辺は広範囲の洪水被害が発生しにくい地形だが、局所的な低地や側溝の溢水には引き続き注意が必要。					現時点でも目立った増水や冠水は確認されていない	被害なし	道路や住宅への浸水・冠水は引き続き確認されておらず、住民からの被害通報もない。通常通りの生活が維持されている。	今後の増水や下流域の氾濫情報に引き続き注意。周辺住民への警戒情報の周知、要配慮者への定期的な状況確認、避難所開設準備や土のう配布体制の再点検を継続する。	平成25年台風18号時にも、淀川本流から離れた高台地域では大きな冠水被害は報告されていない。	[]	[]
		1-39	900	発災182分後					淀川本流から約900m離れた住宅地で、やや高台に位置する。周辺は広範囲の洪水被害が発生しにくい地形だが、局所的な低地や側溝の溢水には引き続き注意が必要。					現時点でも目立った増水や冠水は確認されていない	被害なし	道路や住宅への浸水・冠水は引き続き確認されておらず、住民からの被害通報もない。通常通りの生活が維持されている。	今後の増水や下流域の氾濫情報に引き続き注意。周辺住民への警戒情報の周知、要配慮者への定期的な状況確認、避難所開設準備や土のう配布体制の再点検を継続する。	平成25年台風18号時にも、淀川本流から離れた高台地域では大きな冠水被害は報告されていない。	[]	[]

## Sheet: 枚方市北船橋町25
評価	備考	シナリオID	(推測)災害の中心からの距離[m]	イベント発生時刻	付与内容	情報源	状況付与内容	補足情報	地形情報や想定想定される被害の特徴	訓練効果・狙い	判断ポイント	期待される対応行動	想定される課題	水位状況	被害の種類	詳細な被害状況	想定される対策	類似の過去事例(あれば記載)	直近のリスク	二次的なリスク
		1-4	1100	発災5分後					淀川本流から約1.1km離れた位置にあり、周辺は比較的標高が高く、住宅地が広がる。地形的に直接的な氾濫水の流入は受けにくいが、今後の状況次第では低地部分で一時的な冠水の可能性もある。					現時点で目立った増水や冠水は確認されていない	被害なし	現時点では道路や住宅への浸水・冠水は確認されていない。住民からの被害通報もなく、通常通りの生活が維持されている。	今後の増水や下流域の氾濫情報に備えた情報収集と警戒態勢の維持。周辺住民への注意喚起と、要配慮者への状況確認を継続する。	平成25年台風18号時にも、淀川本流から離れた高台地域では大きな冠水被害は報告されていない。	[]	[]
		1-5	1100	発災8分後					淀川本流から約1.1km離れた位置にあり、周辺は比較的標高が高い住宅地。地形的に直接的な氾濫水の流入は受けにくく、広範囲な冠水のリスクは低い。低地部分で一時的な冠水の可能性はあるが、現時点では顕著な被害は報告されていない。					現時点で目立った増水や冠水は確認されていない	被害なし	道路や住宅への浸水・冠水は確認されていない。住民からの被害通報もなく、通常通りの生活が維持されている。	今後の増水や下流域の氾濫情報に備えた情報収集と警戒態勢の維持。周辺住民への注意喚起と、要配慮者への状況確認を継続する。	平成25年台風18号時にも、淀川本流から離れた高台地域では大きな冠水被害は報告されていない。	[]	[]
		1-6	1100	発災13分後					淀川本流から約1.1km離れた位置で、比較的標高が高い住宅地。地形的に直接的な氾濫水の流入は受けにくいが、今後の下流域や低地部分での一時的な冠水には注意が必要。					現時点で目立った増水や冠水は確認されていない	被害なし	道路や住宅への浸水・冠水は確認されていない。住民からの被害通報もなく、通常通りの生活が維持されている。	今後の淀川の増水や下流域の氾濫情報に備え、情報収集と警戒態勢を維持。周辺住民への注意喚起と、要配慮者への状況確認を継続する。	平成25年台風18号時にも、淀川本流から離れた高台地域では大きな冠水被害は報告されていない。	[]	[]
		1-7	1100	発災18分後					淀川本流から約1.1km離れた位置にあり、周辺は比較的標高が高い住宅地。地形的に直接的な氾濫水の流入は受けにくい。周囲の低地部で一時的な冠水が発生する可能性はあるが、現時点では顕著な被害は見られない。					現時点で目立った増水や冠水は確認されていない	被害なし	道路や住宅への浸水・冠水は確認されていない。住民からの被害通報もなく、通常通りの生活が維持されている。	今後の増水や下流域の氾濫情報に備えた情報収集と警戒態勢の維持。周辺住民への注意喚起と、要配慮者への状況確認を継続する。引き続き避難所開設準備や土のう配布体制を確認しておく。	平成25年台風18号時にも、淀川本流から離れた高台地域では大きな冠水被害は報告されていない。	[]	[]
		1-8	1100	発災25分後					淀川本流から約1.1km離れた位置にあり、周辺は比較的標高が高い住宅地。地形的に直接的な氾濫水の流入は受けにくい。周囲の低地部で一時的な冠水が発生する可能性はあるが、現時点では顕著な被害は見られない。					現時点で目立った増水や冠水は確認されていない	被害なし	道路や住宅への浸水・冠水は確認されていない。住民からの被害通報もなく、通常通りの生活が維持されている。	今後の増水や下流域の氾濫情報に備えた情報収集と警戒態勢の維持。周辺住民への注意喚起と、要配慮者への状況確認を継続する。引き続き避難所開設準備や土のう配布体制を確認しておく。	平成25年台風18号時にも、淀川本流から離れた高台地域では大きな冠水被害は報告されていない。	[]	[]
		1-9	1100	発災26分後					淀川本流から約1.1km離れた位置にあり、周辺は比較的標高が高い住宅地。地形的に直接的な氾濫水の流入は受けにくい。周囲の低地部で一時的な冠水が発生する可能性はあるが、現時点では顕著な被害は見られない。					現時点で目立った増水や冠水は確認されていない	被害なし	道路や住宅への浸水・冠水は確認されていない。住民からの被害通報もなく、通常通りの生活が維持されている。	今後の増水や下流域の氾濫情報に備えた情報収集と警戒態勢の維持。周辺住民への注意喚起と、要配慮者への状況確認を継続する。引き続き避難所開設準備や土のう配布体制を確認しておく。	平成25年台風18号時にも、淀川本流から離れた高台地域では大きな冠水被害は報告されていない。	[]	[]
		1-10	1100	発災32分後					淀川本流から約1.1km離れた位置で、周辺は比較的標高が高い住宅地。地形的に直接的な氾濫水の流入は受けにくい。広範囲な冠水リスクは低いが、今後の下流域の状況や長時間の降雨による局所的な冠水には引き続き注意が必要。					現時点で目立った増水や冠水は確認されていない	被害なし	道路や住宅への浸水・冠水は引き続き確認されていない。住民からの被害通報もなく、通常通りの生活が維持されている。	今後の増水や下流域の氾濫情報に備えた情報収集と警戒態勢の維持。周辺住民への注意喚起と、要配慮者への状況確認を継続。避難所開設準備や土のう配布体制の再確認も行う。	平成25年台風18号時にも、淀川本流から離れた高台地域では大きな冠水被害は報告されていない。	[]	[]
		1-11	1100	発災37分後					淀川本流から約1.1km離れた位置にあり、周辺は比較的標高が高い住宅地。地形的に直接的な氾濫水の流入は受けにくく、広範囲な冠水リスクは低い。今後の下流域や低地部分で一時的な冠水の可能性はあるが、現時点では顕著な被害は報告されていない。					現時点で目立った増水や冠水は確認されていない	被害なし	道路や住宅への浸水・冠水は引き続き確認されていない。住民からの被害通報もなく、通常通りの生活が維持されている。	今後の増水や下流域の氾濫情報に備えた情報収集と警戒態勢の維持。周辺住民への注意喚起と、要配慮者への状況確認を継続。避難所開設準備や土のう配布体制の再確認も行う。	平成25年台風18号時にも、淀川本流から離れた高台地域では大きな冠水被害は報告されていない。	[]	[]
		1-12	1100	発災41分後					淀川本流から約1.1km離れた位置にあり、周辺は比較的標高が高い住宅地。地形的に直接的な氾濫水の流入は受けにくく、広範囲な冠水リスクは低い。今後の下流域や低地部分で一時的な冠水の可能性はあるが、現時点では顕著な被害は報告されていない。					現時点で目立った増水や冠水は確認されていない	被害なし	道路や住宅への浸水・冠水は引き続き確認されていない。住民からの被害通報もなく、通常通りの生活が維持されている。	今後の増水や下流域の氾濫情報に備えた情報収集と警戒態勢の維持。周辺住民への注意喚起と、要配慮者への状況確認を継続。避難所開設準備や土のう配布体制の再確認も行う。	平成25年台風18号時にも、淀川本流から離れた高台地域では大きな冠水被害は報告されていない。	[]	[]
		1-13	1100	発災46分後					淀川本流から約1.1km離れた位置にあり、周辺は比較的標高が高い住宅地。地形的に直接的な氾濫水の流入は受けにくく、広範囲な冠水のリスクは低い。今後の下流域や低地部分で一時的な冠水の可能性はあるが、現時点では顕著な被害は見られない。					現時点で目立った増水や冠水は確認されていない	被害なし	道路や住宅への浸水・冠水は確認されていない。住民からの被害通報もなく、通常通りの生活が維持されている。	今後の増水や下流域の氾濫情報に備えた情報収集と警戒態勢の維持。周辺住民への注意喚起と、要配慮者への状況確認を継続。避難所開設準備や土のう配布体制の再確認も行う。	平成25年台風18号時にも、淀川本流から離れた高台地域では大きな冠水被害は報告されていない。	[]	[]
		1-14	1100	発災52分後					淀川本流から約1.1km離れた位置にあり、周辺は比較的標高が高い住宅地。地形的に直接的な氾濫水の流入は受けにくい。広範囲な冠水リスクは低いが、今後の下流域や局所的な低地での一時的な冠水には引き続き注意が必要。					現時点で目立った増水や冠水は確認されていない	被害なし	道路や住宅への浸水・冠水は引き続き確認されていない。住民からの被害通報もなく、通常通りの生活が維持されている。	今後の増水や下流域の氾濫情報に備えた情報収集と警戒態勢の維持。周辺住民への注意喚起と、要配慮者への状況確認を継続。避難所開設準備や土のう配布体制の再確認も行う。	平成25年台風18号時にも、淀川本流から離れた高台地域では大きな冠水被害は報告されていない。	[]	[]
		1-15	1100	発災56分後					淀川本流から約1.1km離れた位置にあり、周辺は比較的標高が高い住宅地。地形的に直接的な氾濫水の流入は受けにくい。広範囲な冠水リスクは低く、今後の下流域や局所的な低地での一時的な冠水には引き続き注意が必要。					現時点で目立った増水や冠水は確認されていない	被害なし	道路や住宅への浸水・冠水は引き続き確認されていない。住民からの被害通報もなく、通常通りの生活が維持されている。	今後の増水や下流域の氾濫情報に備えた情報収集と警戒態勢の維持。周辺住民への注意喚起と、要配慮者への状況確認を継続。避難所開設準備や土のう配布体制の再確認も行う。	平成25年台風18号時にも、淀川本流から離れた高台地域では大きな冠水被害は報告されていない。	[]	[]
		1-16	1100	発災61分後					淀川本流から約1.1km離れた位置にあり、周辺は比較的標高が高い住宅地。地形的に直接的な氾濫水の流入は受けにくく、広範囲な冠水リスクは低い。今後も局所的な低地での一時的な冠水には注意が必要だが、現時点で顕著な被害は認められない。					現時点で目立った増水や冠水は確認されていない	被害なし	道路や住宅への浸水・冠水は引き続き確認されていない。住民からの被害通報もなく、通常通りの生活が維持されている。	今後の増水や下流域の氾濫情報に備えた情報収集と警戒態勢の維持。周辺住民への注意喚起と、要配慮者への状況確認を継続。避難所開設準備や土のう配布体制の再確認も行う。	平成25年台風18号時にも、淀川本流から離れた高台地域では大きな冠水被害は報告されていない。	[]	[]
		1-17	1100	発災69分後					淀川本流から約1.1km離れた位置にあり、周辺は比較的標高が高い住宅地。地形的に直接的な氾濫水の流入は受けにくく、広範囲な冠水リスクは低い。今後も局所的な低地での一時的な冠水には注意が必要だが、現時点で顕著な被害は認められない。					現時点で目立った増水や冠水は確認されていない	被害なし	道路や住宅への浸水・冠水は引き続き確認されていない。住民からの被害通報もなく、通常通りの生活が維持されている。	今後の増水や下流域の氾濫情報に備えた情報収集と警戒態勢の維持。周辺住民への注意喚起と、要配慮者への状況確認を継続。避難所開設準備や土のう配布体制の再確認も行う。	平成25年台風18号時にも、淀川本流から離れた高台地域では大きな冠水被害は報告されていない。	[]	[]
		1-18	1100	発災74分後					淀川本流から約1.1km離れた位置にある比較的標高が高い住宅地。周辺は緩やかな高台で、地形的に直接的な氾濫水の流入は受けにくい。広範囲な冠水リスクは低いが、今後も局所的な低地での一時的な冠水には注意が必要。					現時点で目立った増水や冠水は確認されていない	被害なし	道路や住宅への浸水・冠水は引き続き確認されていない。住民からの被害通報もなく、通常通りの生活が維持されている。	今後の増水や下流域の氾濫情報に備えた情報収集と警戒態勢の維持。周辺住民への注意喚起と、要配慮者への状況確認を継続。避難所開設準備や土のう配布体制の再確認も行う。	平成25年台風18号時にも、淀川本流から離れた高台地域では大きな冠水被害は報告されていない。	[]	[]
		1-19	1100	発災80分後					淀川本流から約1.1km離れた位置にある比較的標高が高い住宅地。周辺は緩やかな高台で、地形的に直接的な氾濫水の流入は受けにくい。広範囲な冠水リスクは低いが、今後も局所的な低地での一時的な冠水には注意が必要。					現時点で目立った増水や冠水は確認されていない	被害なし	道路や住宅への浸水・冠水は引き続き確認されていない。住民からの被害通報もなく、通常通りの生活が維持されている。	今後の増水や下流域の氾濫情報に備えた情報収集と警戒態勢の維持。周辺住民への注意喚起と、要配慮者への状況確認を継続。避難所開設準備や土のう配布体制の再確認も行う。	平成25年台風18号時にも、淀川本流から離れた高台地域では大きな冠水被害は報告されていない。	[]	[]
		1-20	1100	発災83分後					淀川本流から約1.1km離れた位置にある比較的標高が高い住宅地。周辺は緩やかな高台で、地形的に直接的な氾濫水の流入は受けにくい。広範囲な冠水リスクは低いが、今後も局所的な低地での一時的な冠水には注意が必要。					現時点で目立った増水や冠水は確認されていない	被害なし	道路や住宅への浸水・冠水は引き続き確認されていない。住民からの被害通報もなく、通常通りの生活が維持されている。	今後の増水や下流域の氾濫情報に備えた情報収集と警戒態勢の維持。周辺住民への注意喚起と、要配慮者への状況確認を継続。避難所開設準備や土のう配布体制の再確認も行う。	平成25年台風18号時にも、淀川本流から離れた高台地域では大きな冠水被害は報告されていない。	[]	[]
		1-21	1100	発災90分後					淀川本流から約1.1km離れた高台の住宅地。周囲は緩やかな傾斜で、低地部に比べて氾濫水の流入リスクは極めて低い。局所的な冠水リスクも現時点では認められない。					目立った増水や冠水は引き続き確認されていない	被害なし	道路や住宅への浸水・冠水は発生しておらず、住民からの被害通報もない。通常通りの生活が維持されている。	今後の増水や下流域の氾濫情報に備えた情報収集と警戒態勢の維持。周辺住民への注意喚起、要配慮者への状況確認を継続。避難所開設準備や土のう配布体制の再確認も怠らない。	平成25年台風18号時にも、淀川本流から離れた高台地域では大きな冠水被害は報告されていない。	[]	[]
		1-22	1100	発災94分後					淀川本流から約1.1km離れた緩やかな高台の住宅地で、周囲は住宅地が広がる。標高差があり、低地部に比べて氾濫水の流入リスクは極めて低い。局所的な冠水リスクも現時点では認められない。					目立った増水や冠水は引き続き確認されていない	被害なし	道路や住宅への浸水・冠水は発生しておらず、住民からの被害通報もない。通常通りの生活が維持されている。	今後の増水や下流域の氾濫情報に備えた情報収集と警戒態勢の維持。周辺住民への注意喚起、要配慮者への状況確認を継続。避難所開設準備や土のう配布体制の再確認も怠らない。	平成25年台風18号時にも、淀川本流から離れた高台地域では大きな冠水被害は報告されていない。	[]	[]
		1-23	1100	発災97分後					淀川本流から約1.1km離れた緩やかな高台の住宅地で、周囲は住宅地が広がる。標高差があり、低地部に比べて氾濫水の流入リスクは極めて低い。局所的な冠水リスクも現時点では認められない。					目立った増水や冠水は引き続き確認されていない	被害なし	道路や住宅への浸水・冠水は発生しておらず、住民からの被害通報もない。通常通りの生活が維持されている。	今後の増水や下流域の氾濫情報に備えた情報収集と警戒態勢の維持。周辺住民への注意喚起、要配慮者への状況確認を継続。避難所開設準備や土のう配布体制の再確認も怠らない。	平成25年台風18号時にも、淀川本流から離れた高台地域では大きな冠水被害は報告されていない。	[]	[]
		1-24	1100	発災101分後					淀川本流から約1.1km離れた緩やかな高台の住宅地で、周囲は住宅地が広がる。標高差があり、低地部に比べて氾濫水の流入リスクは極めて低い。局所的な冠水リスクも現時点では認められない。					目立った増水や冠水は引き続き確認されていない	被害なし	道路や住宅への浸水・冠水は発生しておらず、住民からの被害通報もない。通常通りの生活が維持されている。	今後の増水や下流域の氾濫情報に備えた情報収集と警戒態勢の維持。周辺住民への注意喚起、要配慮者への状況確認を継続。避難所開設準備や土のう配布体制の再確認も怠らない。	平成25年台風18号時にも、淀川本流から離れた高台地域では大きな冠水被害は報告されていない。	[]	[]
		1-25	1100	発災110分後					淀川本流から約1.1km離れた緩やかな高台の住宅地で、周囲は住宅地が広がる。標高差があり、低地部に比べて氾濫水の流入リスクは極めて低い。局所的な冠水リスクも現時点では認められない。					目立った増水や冠水は引き続き確認されていない	被害なし	道路や住宅への浸水・冠水は発生しておらず、住民からの被害通報もない。通常通りの生活が維持されている。	今後の増水や下流域の氾濫情報に備えた情報収集と警戒態勢の維持。周辺住民への注意喚起、要配慮者への状況確認を継続。避難所開設準備や土のう配布体制の再確認も怠らない。	平成25年台風18号時にも、淀川本流から離れた高台地域では大きな冠水被害は報告されていない。	[]	[]
		1-26	1100	発災115分後					淀川本流から約1.1km離れた緩やかな高台の住宅地で、周囲は住宅地が広がる。標高差があり、低地部に比べて氾濫水の流入リスクは極めて低い。局所的な冠水リスクも現時点では認められない。					目立った増水や冠水は引き続き確認されていない	被害なし	道路や住宅への浸水・冠水は発生しておらず、住民からの被害通報もない。通常通りの生活が維持されている。	今後の増水や下流域の氾濫情報に備えた情報収集と警戒態勢の維持。周辺住民への注意喚起、要配慮者への状況確認を継続。避難所開設準備や土のう配布体制の再確認も怠らない。	平成25年台風18号時にも、淀川本流から離れた高台地域では大きな冠水被害は報告されていない。	[]	[]
		1-27	1100	発災120分後					淀川本流から約1.1km離れた緩やかな高台の住宅地で、周囲は住宅地が広がる。標高差があり、低地部に比べて氾濫水の流入リスクは極めて低い。局所的な冠水リスクも現時点では認められない。					目立った増水や冠水は引き続き確認されていない	被害なし	道路や住宅への浸水・冠水は発生しておらず、住民からの被害通報もない。通常通りの生活が維持されている。	今後の増水や下流域の氾濫情報に備えた情報収集と警戒態勢の維持。周辺住民への注意喚起、要配慮者への状況確認を継続。避難所開設準備や土のう配布体制の再確認も怠らない。	平成25年台風18号時にも、淀川本流から離れた高台地域では大きな冠水被害は報告されていない。	[]	[]
		1-28	1100	発災125分後					淀川本流から約1.1km離れた緩やかな高台の住宅地で、周囲は住宅地が広がる。標高差があり、低地部に比べて氾濫水の流入リスクは極めて低い。局所的な冠水リスクも現時点では認められない。					目立った増水や冠水は引き続き確認されていない	被害なし	道路や住宅への浸水・冠水は発生しておらず、住民からの被害通報もない。通常通りの生活が維持されている。	今後の増水や下流域の氾濫情報に備えた情報収集と警戒態勢の維持。周辺住民への注意喚起、要配慮者への状況確認を継続。避難所開設準備や土のう配布体制の再確認も怠らない。	平成25年台風18号時にも、淀川本流から離れた高台地域では大きな冠水被害は報告されていない。	[]	[]
		1-29	1100	発災128分後					淀川本流から約1.1km離れた緩やかな高台の住宅地で、標高差があり低地部に比べて氾濫水の流入リスクは極めて低い。周辺は住宅地が広がり、広範囲な冠水や浸水被害は想定しにくい。					目立った増水や冠水は引き続き確認されていない	被害なし	道路や住宅への浸水・冠水は引き続き発生しておらず、住民からの被害通報もない。通常通りの生活が維持されている。	今後の増水や下流域の氾濫情報に備えた情報収集と警戒態勢の維持。周辺住民への注意喚起、要配慮者への状況確認を継続。避難所開設準備や土のう配布体制の再確認も怠らない。	平成25年台風18号時にも、淀川本流から離れた高台地域では大きな冠水被害は報告されていない。	[]	[]
		1-30	1100	発災133分後					淀川本流から約1.1km離れた緩やかな高台の住宅地で、標高差があり低地部に比べて氾濫水の流入リスクは極めて低い。周辺は住宅地が広がり、広範囲な冠水や浸水被害は想定しにくい。					目立った増水や冠水は引き続き確認されていない	被害なし	道路や住宅への浸水・冠水は引き続き発生しておらず、住民からの被害通報もない。通常通りの生活が維持されている。	今後の増水や下流域の氾濫情報に備えた情報収集と警戒態勢の維持。周辺住民への注意喚起、要配慮者への状況確認を継続。避難所開設準備や土のう配布体制の再確認も怠らない。	平成25年台風18号時にも、淀川本流から離れた高台地域では大きな冠水被害は報告されていない。	[]	[]
		1-31	1100	発災137分後					淀川本流から約1.1km離れた緩やかな高台の住宅地で、標高差があり低地部に比べて氾濫水の流入リスクは極めて低い。周辺は住宅地が広がり、広範囲な冠水や浸水被害は想定しにくい。					目立った増水や冠水は引き続き確認されていない	被害なし	道路や住宅への浸水・冠水は引き続き発生しておらず、住民からの被害通報もない。通常通りの生活が維持されている。	今後の増水や下流域の氾濫情報に備えた情報収集と警戒態勢の維持。周辺住民への注意喚起、要配慮者への状況確認を継続。避難所開設準備や土のう配布体制の再確認も怠らない。	平成25年台風18号時にも、淀川本流から離れた高台地域では大きな冠水被害は報告されていない。	[]	[]
		1-32	1100	発災142分後					淀川本流から約1.1km離れた緩やかな高台の住宅地で、標高差があり低地部に比べて氾濫水の流入リスクは極めて低い。周辺は住宅地が広がり、広範囲な冠水や浸水被害は想定しにくい。					目立った増水や冠水は引き続き確認されていない	被害なし	道路や住宅への浸水・冠水は引き続き発生しておらず、住民からの被害通報もない。通常通りの生活が維持されている。	今後の増水や下流域の氾濫情報に備えた情報収集と警戒態勢の維持。周辺住民への注意喚起、要配慮者への状況確認を継続。避難所開設準備や土のう配布体制の再確認も怠らない。	平成25年台風18号時にも、淀川本流から離れた高台地域では大きな冠水被害は報告されていない。	[]	[]
		1-33	1100	発災148分後					淀川本流から約1.1km離れた緩やかな高台の住宅地で、標高差があり低地部に比べて氾濫水の流入リスクは極めて低い。広範囲な冠水や浸水被害は想定しにくい。					目立った増水や冠水は引き続き確認されていない	被害なし	道路や住宅への浸水・冠水は引き続き発生しておらず、住民からの被害通報もない。通常通りの生活が維持されている。	今後の増水や下流域の氾濫情報に備えた情報収集と警戒態勢の維持。周辺住民への注意喚起、要配慮者への状況確認を継続。避難所開設準備や土のう配布体制の再確認も怠らない。	平成25年台風18号時にも、淀川本流から離れた高台地域では大きな冠水被害は報告されていない。	[]	[]
		1-34	1100	発災154分後					淀川本流から約1.1km離れた緩やかな高台の住宅地で、標高差があり低地部に比べて氾濫水の流入リスクは極めて低い。広範囲な冠水や浸水被害は想定しにくい。					目立った増水や冠水は引き続き確認されていない	被害なし	道路や住宅への浸水・冠水は引き続き発生しておらず、住民からの被害通報もない。通常通りの生活が維持されている。	今後の増水や下流域の氾濫情報に備えた情報収集と警戒態勢の維持。周辺住民への注意喚起、要配慮者への状況確認を継続。避難所開設準備や土のう配布体制の再確認も怠らない。	平成25年台風18号時にも、淀川本流から離れた高台地域では大きな冠水被害は報告されていない。	[]	[]
		1-35	1100	発災156分後					淀川本流から約1.1km離れた緩やかな高台の住宅地で、標高差があり低地部に比べて氾濫水の流入リスクは極めて低い。周辺は住宅地が広がり、広範囲な冠水や浸水被害は想定しにくい。					目立った増水や冠水は引き続き確認されていない	被害なし	道路や住宅への浸水・冠水は引き続き発生しておらず、住民からの被害通報もない。通常通りの生活が維持されている。	今後の増水や下流域の氾濫情報に備えた情報収集と警戒態勢の維持。周辺住民への注意喚起、要配慮者への状況確認を継続。避難所開設準備や土のう配布体制の再確認も怠らない。	平成25年台風18号時にも、淀川本流から離れた高台地域では大きな冠水被害は報告されていない。	[]	[]
		1-36	1100	発災163分後					淀川本流から約1.1km離れた緩やかな高台の住宅地で、標高差があり低地部に比べて氾濫水の流入リスクは極めて低い。周辺は住宅地が広がり、広範囲な冠水や浸水被害は想定しにくい。					目立った増水や冠水は引き続き確認されていない	被害なし	道路や住宅への浸水・冠水は引き続き発生しておらず、住民からの被害通報もない。通常通りの生活が維持されている。	今後の増水や下流域の氾濫情報に備えた情報収集と警戒態勢の維持。周辺住民への注意喚起、要配慮者への状況確認を継続。避難所開設準備や土のう配布体制の再確認も怠らない。	平成25年台風18号時にも、淀川本流から離れた高台地域では大きな冠水被害は報告されていない。	[]	[]
		1-37	1100	発災170分後					淀川本流から約1.1km離れた緩やかな高台の住宅地で、標高差があり低地部に比べて氾濫水の流入リスクは極めて低い。周辺は住宅地が広がり、広範囲な冠水や浸水被害は想定しにくい。					目立った増水や冠水は引き続き確認されていない	被害なし	道路や住宅への浸水・冠水は引き続き発生しておらず、住民からの被害通報もない。通常通りの生活が維持されている。	今後の増水や下流域の氾濫情報に備えた情報収集と警戒態勢の維持。周辺住民への注意喚起、要配慮者への状況確認を継続。避難所開設準備や土のう配布体制の再確認も怠らない。	平成25年台風18号時にも、淀川本流から離れた高台地域では大きな冠水被害は報告されていない。	[]	[]
		1-38	1100	発災171分後					淀川本流から約1.1km離れた緩やかな高台の住宅地で、標高差があり低地部に比べて氾濫水の流入リスクは極めて低い。周辺は住宅地が広がり、広範囲な冠水や浸水被害は想定しにくい。					目立った増水や冠水は引き続き確認されていない	被害なし	道路や住宅への浸水・冠水は引き続き発生しておらず、住民からの被害通報もない。通常通りの生活が維持されている。	今後の増水や下流域の氾濫情報に備えた情報収集と警戒態勢の維持。周辺住民への注意喚起、要配慮者への状況確認を継続。避難所開設準備や土のう配布体制の再確認も怠らない。	平成25年台風18号時にも、淀川本流から離れた高台地域では大きな冠水被害は報告されていない。	[]	[]
		1-39	1100	発災178分後					淀川本流から約1.1km離れた緩やかな高台の住宅地で、標高差があり低地部に比べて氾濫水の流入リスクは極めて低い。周辺は住宅地が広がり、広範囲な冠水や浸水被害は想定しにくい。					目立った増水や冠水は引き続き確認されていない	被害なし	道路や住宅への浸水・冠水は引き続き発生しておらず、住民からの被害通報もない。通常通りの生活が維持されている。	今後の増水や下流域の氾濫情報に備えた情報収集と警戒態勢の維持。周辺住民への注意喚起、要配慮者への状況確認を継続。避難所開設準備や土のう配布体制の再確認も怠らない。	平成25年台風18号時にも、淀川本流から離れた高台地域では大きな冠水被害は報告されていない。	[]	[]
		1-40	1100	発災182分後					淀川本流から約1.1km離れた緩やかな高台の住宅地で、標高差があり低地部に比べて氾濫水の流入リスクは極めて低い。周辺は住宅地が広がり、広範囲な冠水や浸水被害は想定しにくい。					目立った増水や冠水は引き続き確認されていない	被害なし	道路や住宅への浸水・冠水は引き続き発生しておらず、住民からの被害通報もない。通常通りの生活が維持されている。	今後の増水や下流域の氾濫情報に備えた情報収集と警戒態勢の維持。周辺住民への注意喚起、要配慮者への状況確認を継続。避難所開設準備や土のう配布体制の再確認も怠らない。	平成25年台風18号時にも、淀川本流から離れた高台地域では大きな冠水被害は報告されていない。	[]	[]

## Sheet: 枚方市楠葉朝日一丁目9
評価	備考	シナリオID	(推測)災害の中心からの距離[m]	イベント発生時刻	付与内容	情報源	状況付与内容	補足情報	地形情報や想定想定される被害の特徴	訓練効果・狙い	判断ポイント	期待される対応行動	想定される課題	水位状況	被害の種類	詳細な被害状況	想定される対策	類似の過去事例(あれば記載)	直近のリスク	二次的なリスク
		1-2	450	発災5分後	生活道路の一部で冠水が発生し、住宅街の低地側で水たまりが広がっている	住民	自宅近くの道路で浅い冠水が始まり、車の通行がしづらくなってきている。歩道の一部にも水が流れ込んでいるが、住宅への浸水は今のところ確認できていない。	消防や警察にはまだ連絡していない。冠水箇所は朝日一丁目9番地付近の南側道路とのこと。	淀川から約450m、低地で住宅密集地。南側はやや窪地となっており、周辺より冠水しやすい。下水処理能力が限界を超えると道路冠水が拡大しやすい。	初動段階での住民からの被害情報収集と、冠水拡大時の対応準備を訓練する。	住民からの初期通報の受理と現地状況の確認、冠水拡大時の避難判断基準の共有、関係機関との連携強化。	通報内容の詳細聴取、現場確認班の派遣、住民への注意喚起・避難準備情報の伝達、消防・警察への情報共有。	冠水範囲の正確な把握の遅れ、住民の避難判断の遅延、情報伝達の混乱、側溝溢水による転倒事故や車両の立ち往生	道路で足首程度の冠水、歩道にも部分的に水が流れ込んでいる	軽度冠水・交通障害	道路の一部が冠水し始め、歩道にも水が流れ込んでいる。住宅への直接浸水は現時点で確認されていないが、今後の増水で拡大の恐れ。車両通行が難しくなりつつある。	住民への早期注意喚起、現場巡回と冠水範囲の確認、側溝・排水口の点検、関係機関との情報共有、避難準備情報の伝達	平成25年台風18号時、同地域で道路冠水と一部住宅床下浸水の報告あり	['道路冠水による通行障害', '側溝溢水による転倒や車両事故']	['冠水拡大による住宅浸水', '下水逆流による衛生被害']
		1-3	450	発災10分後	道路冠水が拡大し、一部の住宅敷地内への浸水が始まったとの現場報告が入る	消防	消防隊が現地巡回を行ったところ、朝日一丁目9番地付近の南側道路で冠水が膝下程度まで拡大。低地側の住宅敷地内にも水が入り始めており、住民が土のうを積むなど対応している。住宅内への本格的な浸水は現時点で確認されていないが、今後の増水に警戒が必要との報告。	現場は住宅密集地で、道路沿いの排水口の一部が既に詰まり始めている。消防は住民への避難準備の呼びかけと排水口の点検を実施中。	淀川から約450m、低地で住宅密集地。南側はやや窪地となっており、周辺より冠水しやすい。下水処理能力が限界を超えると道路冠水が拡大しやすい。	冠水拡大時の現場状況把握と、住民への避難準備・情報伝達、消防・行政の現場連携訓練。	消防による現地状況の詳細把握、住民への避難準備呼びかけ、排水機能の確認、冠水拡大時の迅速な初動体制の構築。	消防からの現場情報の受理、避難準備情報の再度伝達、排水口点検の応援要請、要配慮者リストの再確認、住民の安全確保、必要に応じて避難所開設準備。	排水機能の限界による冠水拡大、住民の避難判断遅延、要配慮者の所在確認遅れ、現場と本部間の情報共有不足	道路で膝下程度の冠水、低地側住宅敷地内にも浸水開始	中度冠水・敷地内浸水	道路冠水が拡大し、歩道や一部住宅の敷地内へも浸水が始まっている。住宅内への本格的な浸水は現時点で確認されていないが、増水が続けば床下浸水の恐れあり。排水口の詰まりも発生し、排水機能が低下。	住民への避難準備呼びかけ、排水口・側溝の詰まり点検・清掃、消防・警察・行政の連携強化、要配慮者の所在確認と個別支援、土のう配布・設置支援	平成25年台風18号時、同地域で道路冠水と一部住宅床下浸水・排水口詰まりによる被害が発生した事例あり。	['道路冠水による通行障害', '歩道・敷地内への浸水拡大', '排水口詰まりによるさらなる水位上昇']	['住宅床下浸水による家財被害', '下水逆流による衛生被害', '要配慮者の避難遅延', '冠水拡大による孤立']
		1-4	450	発災15分後	住宅街の一部で床下浸水が始まり、要配慮者世帯から避難支援要請が入る	住民	朝日一丁目9番地付近の低地側に住む高齢者世帯から、自宅の床下に水が入り始めており、身体が不自由なため自力で避難できないとの通報が入った。	要配慮者は1世帯（高齢者夫婦のみ）。道路の冠水と水位上昇で家の外に出るのが困難とのこと。消防には連絡済みだが、まだ到着していない。	淀川から約450mの低地で住宅密集地。南側は窪地で水が集まりやすく、排水能力を超えると急速に浸水拡大。高齢者世帯も多く、避難困難者が発生しやすい。	床下浸水・要配慮者発生時の安否確認・避難支援要請受理・現場対応指示の訓練。情報の優先順位付けと現場連携の強化を狙う。	要配慮者からの避難支援要請受理、現場への応援・支援班の派遣、床下浸水拡大時の迅速な状況把握と住民安全確保。多機関連携（福祉・消防・警察）の実践。	避難支援要請世帯のリストアップと現場への伝達、消防・警察・福祉部門との連携による支援班派遣、現場状況の継続把握、避難所受け入れ準備の加速、住民への避難情報再通知。	床下浸水拡大による家財被害、要配慮者の避難遅延、支援班の現場到着困難、複数世帯からの同時要請への対応遅延、現場と本部間の情報共有不足	道路で膝程度の冠水、低地側住宅敷地と床下に水が浸入開始	床下浸水・要配慮者避難困難	道路・歩道の冠水がさらに拡大し、複数の住宅で床下浸水が発生。高齢者のみの世帯で自力避難が困難なケースが出ており、避難支援要請が入る。排水口の詰まり箇所も増加。	要配慮者名簿の再確認、避難支援班の迅速派遣、現場状況の逐次把握、排水口・側溝の詰まり解消作業、住民への避難情報再通知、消防・警察・福祉部門の連携強化	平成25年台風18号時、同地域で床下浸水と高齢者避難困難事例あり。避難支援要請が集中し対応が遅れた事例も報告されている。	['床下浸水拡大による家財被害', '要配慮者の避難遅延', '道路冠水による通行障害']	['冠水拡大による孤立世帯の発生', '下水逆流による衛生被害', '支援班の現場到着遅延']
		1-5	450	発災19分後	床下浸水が拡大し、複数世帯から避難支援要請や体調不良の訴えが入り始める	住民	朝日一丁目9番地付近の低地側で、床下浸水が広がり複数世帯から避難支援要請が入っている。また、1世帯の高齢者から気分が悪くなっているとの訴えもあり、救急対応の必要性がある。	避難支援要請は新たに2世帯（いずれも高齢者世帯）。体調不良者は女性（80代、独居）。現場はすでに道路が膝程度の冠水で、歩行が困難な状況。消防・救急には連絡済み。	淀川から約450mの低地で住宅密集地。南側は窪地で水が集まりやすく、排水能力を超えると急速に浸水拡大。高齢者世帯が多く、避難困難者・体調不良者が発生しやすい。	床下浸水・避難困難者・体調不良者同時発生時の情報整理、優先順位付け、現場・本部間の迅速な連携強化を訓練する。	複数の避難支援・救急要請を同時に受理し、優先順位をつけて現場対応を指示。現場班・応援班・救急班の調整、住民の安全確保、情報共有体制の強化。	新たな避難支援・救急要請世帯のリストアップと現場伝達、消防・救急・福祉部門との連携による支援・救急班派遣、現場状況の継続把握、避難所受け入れ体制の再確認、住民への避難再通知。	避難支援・救急要請の同時多発による対応遅延、現場到着困難、優先順位判断の混乱、情報伝達の遅れや錯綜	道路は膝程度の冠水が継続、低地側住宅で床下10〜15cmの浸水が複数発生中	床下浸水拡大・避難困難・体調不良者発生	道路・歩道の冠水が継続し、低地側の複数住宅で床下浸水が拡大。避難支援要請が新たに複数発生し、高齢者世帯で体調不良を訴えるケースも出ている。消防・救急への応援要請が必要な状況。	避難支援・救急班の迅速派遣、優先順位付けと現場対応の徹底、排水口・側溝の詰まり解消作業継続、住民への避難再通知、消防・警察・福祉・救急部門の連携強化	平成25年台風18号時、同地域で床下浸水と高齢者避難困難・体調不良者発生事例あり。避難支援・救急要請が集中し、現場対応が遅れた事例も報告されている。	['床下浸水拡大による家財・住宅被害', '避難困難者・体調不良者の救助遅延', '道路冠水による通行障害']	['冠水拡大による孤立世帯の発生', '下水逆流による衛生被害', '支援・救急班の現場到着遅延']
		1-6	450	発災21分後	床下浸水が継続し、低地側の一部住宅で電気設備（分電盤）付近まで水位が上昇。住民から感電リスクを訴える通報が入る。	住民	朝日一丁目9番地付近の住宅で、床下浸水が続き分電盤の近くまで水が迫っている。住民が『ブレーカーが水に浸かりそうで怖い、どうしたらよいか』と自治体窓口に電話で相談。	現場は南側の窪地で、住宅敷地内に10〜15cmの浸水。消防には連絡済み。住民は高齢者を含む2世帯。分電盤は玄関付近の床下に設置されている。	淀川から約450m、低地で住宅密集地。南側が窪地で水が集まりやすく、排水能力を超えると浸水が急拡大。分電盤が床下や玄関付近に設置されている住宅が多い。	床下浸水時の電気設備リスク対応、住民への安全指導・感電事故防止、現場・本部間の情報伝達・応急対応判断の訓練。	電気設備（分電盤）への浸水リスク把握、住民へのブレーカー遮断指導、感電防止策の伝達、消防・電力会社との連携、現場状況の即時共有。	住民への直ちにブレーカーを遮断するよう指示、現場確認班と消防への情報伝達、電力会社への連絡、避難支援班の追加派遣判断、要配慮者への個別フォロー。	感電リスクによる住民の不安増大、現場対応の遅れによる事故発生、電力会社・消防との連絡調整の遅延、避難判断の混乱	道路は膝程度の冠水が継続、低地側住宅で床下10〜15cmの浸水、分電盤付近まで水位上昇	床下浸水・電気設備リスク・感電事故懸念	床下浸水が継続し、複数住宅で分電盤や電気設備の近くまで水位が上昇。住民から感電リスクを訴える相談が入り、現場ではブレーカー遮断などの安全確保が急務。消防・電力会社への連絡も必要。	住民へのブレーカー遮断・感電防止指導、電力会社・消防との連携強化、避難支援班の迅速派遣、現場状況の逐次把握・情報共有	平成25年台風18号時、同地域で床下浸水から分電盤浸水・感電事故寸前の事例あり。避難支援・安全指導の遅れが被害拡大に繋がった報告もある。	['床下浸水拡大による家財・電気設備被害', '感電・火災リスク', '避難困難者・体調不良者の救助遅延']	['冠水拡大による孤立世帯の発生', '下水逆流による衛生被害', '支援・救急班の現場到着遅延']
		1-7	450	発災30分後	床下浸水が長時間継続し、現場では下水の逆流や悪臭の発生が確認され、住民から衛生面への不安の声が上がっている。	住民	朝日一丁目9番地付近の住民から『床下の水が引かず、トイレや排水口から水が逆流してきている。悪臭もしているので、どうすればいいか』との相談が自治体窓口に入る。	現場は依然として道路に膝程度の冠水が残り、床下浸水も10〜15cm程度継続。住民の多くは自宅2階や高所で待機中。消防・電力会社には先行して連絡済み。	淀川から約450mの低地で住宅密集地。南側が窪地で水が集まりやすく、排水能力を超えると都市型洪水・下水逆流が起こりやすい。	浸水長期化時の衛生被害（二次災害）対応、住民への衛生指導・生活支援、現場・本部間の情報共有・多機関連携の実践訓練。	下水逆流・悪臭発生時の住民対応、衛生リスクへの早期注意喚起、生活支援物資の調達・配布準備、関係機関との連携強化。	住民への衛生被害防止策（手洗い・飲用水確保等）の周知、下水道管理部門への連絡、現場状況の継続把握、必要に応じて消毒・生活支援物資（飲料水・簡易トイレ等）の手配、避難所での受け入れ体制準備。	下水逆流による衛生被害拡大、住民の健康被害（感染症等）、生活物資の調達・配布遅延、複数機関間の情報共有の遅れ	道路は膝程度の冠水継続、床下10〜15cmの浸水、下水逆流発生・悪臭あり	床下浸水長期化・下水逆流・衛生被害懸念	床下浸水が継続する中、下水道や排水口からの逆流・悪臭が発生し、住民から衛生面の不安が高まっている。自宅内での生活環境悪化・健康被害リスクが顕在化しつつある。	住民への衛生指導（手洗い・飲用水管理）、下水道管理部門との連携、簡易トイレ・飲料水等の生活支援物資の手配・配布、現場状況の継続把握と情報共有、避難所での衛生管理体制強化	平成25年台風18号時、同地域で床下浸水長期化による下水逆流・悪臭・感染症リスクが発生した事例あり。生活物資の配布遅延が住民の不安拡大につながった。	['床下浸水継続による家財・電気設備・給湯器被害', '下水逆流による衛生被害・健康被害', '感電・火災リスク']	['冠水長期化による孤立世帯の発生', '感染症・生活環境悪化による体調不良者発生', '支援班・救助班の現場到着遅延']
		1-8	450	発災35分後	床下浸水・下水逆流・悪臭が継続する中、住民から飲料水や簡易トイレ等の生活支援物資要請が複数自治体窓口に寄せられる。	住民	朝日一丁目9番地付近の住民より『床下の水が引かず、トイレや排水口の逆流・悪臭も続いている。飲み水やトイレの備えが心配なので、支援物資を届けてほしい』との要請が複数寄せられている。	現場は依然として道路に膝程度の冠水が残り、床下浸水も10〜15cm程度継続。住民の多くは2階や高所で待機。消防・下水道管理部門には先行して連絡済み。要配慮者世帯も物資要請に含まれている。	淀川から約450mの低地。住宅密集地で南側が窪地となっており、水が集まりやすい。都市型排水能力を超えると排水不良・逆流が起こりやすい。高齢者世帯も多い。	長期化する浸水・下水逆流時の生活支援物資のニーズ把握と、支援物資調達・配布体制の迅速な構築、現場・本部間および関係機関連携の実践訓練。	住民からの生活支援物資要請の受理・優先度判断、物資調達・配布ルートの確保、要配慮者世帯への個別対応、現場状況の継続把握と迅速な情報共有。	住民からの要請内容の詳細聴取、物資（飲料水・簡易トイレ等）の調達・搬送指示、要配慮者世帯リストとの突合・優先配布、消防・福祉・保健部門との連携、現場状況の継続的な把握・本部への即時報告。	物資調達・搬送の遅延、冠水による配布困難、要配慮者世帯への個別対応の遅れ、複数機関間の情報伝達の混乱、住民の不安拡大	道路は膝程度の冠水継続、床下10〜15cmの浸水、下水逆流・悪臭あり	床下浸水長期化・下水逆流・生活支援物資不足	床下浸水と下水逆流・悪臭が継続する中、住民から飲料水や簡易トイレなどの生活支援物資要請が複数発生。要配慮者世帯も含まれ、現場では物資不足・生活環境悪化への不安が拡大している。	生活支援物資（飲料水・簡易トイレ等）の迅速な調達・配布、要配慮者世帯への個別支援、下水道管理部門との連携強化、現場状況の逐次把握、避難所の衛生管理体制強化、住民への衛生指導	平成25年台風18号時、同地域で床下浸水長期化・下水逆流・生活物資不足が発生し、物資配布遅延が住民の不安拡大につながった事例あり。	['床下浸水継続による家財・ガス設備・給湯器被害', '下水逆流による衛生被害・健康被害', '生活物資不足による住民の体調不良・不安拡大']	['冠水長期化による孤立世帯の発生', '感染症・生活環境悪化による体調不良者発生', '支援班・救助班の現場到着遅延']
		1-9	450	発災38分後	床下浸水と下水逆流・生活支援物資不足が継続する中、住民の一部から体調不良（軽度の吐き気や頭痛）が報告され、保健師の派遣要請が自治体窓口に入る。	住民	朝日一丁目9番地付近の住民より『床下の水が引かず、悪臭や下水逆流の影響で家族が頭痛や吐き気を訴えている。医療的な確認をお願いしたい』との要請が入った。	体調不良を訴えているのは高齢者と子どもを含む2世帯。現場は依然として道路に膝程度の冠水、床下10〜15cmの浸水、悪臭も強い。消防・下水道管理部門・福祉部門には先行して連絡済み。	淀川から約450mの低地。住宅密集地で南側が窪地となっており、水が集まりやすい。都市型排水能力を超えると排水不良・逆流が起こりやすい。高齢者世帯も多い。	長期化する浸水・下水逆流に伴う健康被害発生時の保健・医療部門との連携、住民健康被害対応の初動訓練。	住民からの健康被害申告の受理、保健師・医療班の迅速な派遣判断、現場での健康状態確認・応急対応、要配慮者世帯への優先対応、関係機関連携の強化。	体調不良世帯のリストアップと現場への伝達、保健師・医療班の派遣指示、住民への衛生指導・健康被害防止策の再周知、消防・福祉・下水道管理部門との連携、現場状況の継続把握・本部への即時報告。	保健師・医療班の現場到着遅延、冠水によるアクセス困難、健康被害の見逃しや重症化、複数機関間の情報共有の遅れ、住民の不安拡大	道路は膝程度の冠水継続、床下10〜15cmの浸水、下水逆流・悪臭あり	床下浸水長期化・下水逆流・生活支援物資不足・健康被害発生	床下浸水と下水逆流・悪臭が継続し、住民の一部で頭痛や吐き気などの体調不良が発生。高齢者や子どもを含む世帯から医療的支援要請が入り、現場では生活環境悪化と健康被害リスクが顕在化している。	生活支援物資（飲料水・簡易トイレ等）の迅速な配布、保健師・医療班の派遣、住民への衛生・健康指導、下水道管理部門との連携強化、現場状況の逐次把握・情報共有、避難所の衛生管理体制強化	平成25年台風18号時、同地域で床下浸水長期化・下水逆流・生活物資不足・健康被害が発生し、医療班の派遣が遅れた事例あり。	['床下浸水継続による家財・ガス設備・給湯器被害', '下水逆流による衛生被害・健康被害（体調不良者発生）', '生活物資不足による住民の体調不良・不安拡大']	['冠水長期化による孤立世帯の発生', '感染症・生活環境悪化による体調不良者増加', '支援班・救助班・医療班の現場到着遅延']
		1-10	450	発災44分後	床下浸水と下水逆流が継続、保健師・医療班による現場巡回中に、避難所への移動希望者が増加し、避難誘導・搬送の調整が必要となる。	保健師（現場巡回班）	現地巡回中の保健師から『床下浸水と悪臭が続くため、体調不良を訴える住民や小さなお子さんのいる世帯から避難所への移動希望が増えている。道路の冠水で徒歩移動が難しい世帯もあり、搬送手段の調整が必要』と本部に連絡が入った。	避難希望世帯は高齢者・子どもを含む4世帯。道路は膝程度の冠水が継続。消防・福祉部門には現場からの要請済み。	淀川から約450mの低地で住宅密集地。南側が窪地となっており水が集まりやすい。都市型排水能力を超えた状態が長期化しやすく、要配慮者世帯も多い。	長期化する床下浸水・衛生被害下での住民避難希望の増加に対応し、関係機関連携による避難誘導・搬送手順の確認・実践訓練を行う。	避難希望者リストアップと優先順位判断、冠水エリアでの安全な避難誘導・搬送手段（徒歩・車両・ボート等）の選定、現場班・本部・関係機関（消防・福祉・保健）間の調整・情報共有。	避難希望世帯の詳細リスト化、搬送班・誘導班の編成・派遣指示、消防・福祉部門との搬送手段調整、避難所での受け入れ準備、住民への衛生・健康指導の再周知、現場状況の継続把握。	冠水による移動困難、避難希望者の急増による搬送手段不足、要配慮者の個別対応遅延、関係機関間の調整・情報共有遅延、住民の不安拡大	道路は膝程度の冠水継続、床下10〜15cmの浸水、下水逆流・悪臭あり	床下浸水長期化・下水逆流・衛生被害・避難希望者増加	床下浸水と下水逆流・悪臭が継続し、住民の一部で体調不良や生活環境悪化による避難希望が増加。高齢者・子どもを含む世帯が徒歩避難困難な状況で、搬送・誘導体制の強化が必要となっている。	避難希望者リストの早期作成、搬送・誘導班の迅速派遣、冠水エリアでの安全な搬送手段（ボート・高床車等）の確保、避難所の衛生・健康管理体制強化、関係機関との連携徹底、住民への衛生・健康指導再徹底	平成25年台風18号時、同地域で床下浸水・下水逆流・悪臭が長期化し、避難希望世帯の搬送遅延や避難所での衛生問題が発生した事例あり。	['床下浸水継続による家財・設備被害', '下水逆流による衛生被害・健康被害（体調不良者の増加）', '避難希望者の増加による搬送遅延・安全確保困難']	['冠水長期化による孤立世帯の発生', '避難所での感染症・生活環境悪化', '支援班・搬送班の現場到着遅延']
		1-11	450	発災50分後	床下浸水・下水逆流・悪臭が継続し、避難希望者の搬送が進められている中、追加で高齢者世帯から避難所への搬送要請が入る。搬送班・誘導班の現場調整と搬送ルートの再確認が必要となる。	消防	避難希望者の搬送を実施中の消防隊から『追加で高齢者のみの世帯から避難所への搬送希望が入った。現場周辺は依然として道路の冠水が膝程度あり、徒歩搬送は困難。応援班の派遣と搬送ルートの再調整を要請したい』との報告。	追加搬送希望は高齢者世帯2件。現場は膝程度の冠水と床下浸水、悪臭が継続。既に複数世帯の搬送が進行中で、搬送班は一部手薄になっている。	淀川から約450mの低地で住宅密集地。南側が窪地となっており、水が集まりやすい。都市型排水能力を超えた状態が長期化しやすく、高齢者世帯も多い。	避難希望者の増加時における現場搬送体制の再調整や応援要請、多機関連携による搬送ルート・安全確保の実践訓練。	避難希望者・要配慮者の追加搬送要請への迅速対応、搬送ルート・手段（徒歩・ボート等）の再検討、現場班・本部・関係機関（消防・福祉・保健）間の連携調整。	追加避難希望世帯のリストアップ、搬送班・応援班の編成・現場派遣、冠水エリアの搬送ルート再確認、消防・福祉部門との連携による安全な搬送実施、避難所の受け入れ体制再確認、住民への衛生・健康指導再周知。	搬送希望者の増加による対応遅延、搬送班・応援班の人員不足、冠水による搬送困難、要配慮者の個別対応遅延、複数機関間の調整・情報共有の混乱	道路は膝程度の冠水継続、床下10〜15cmの浸水、下水逆流・悪臭あり	床下浸水長期化・下水逆流・衛生被害・避難希望者増加・追加搬送要請	床下浸水と下水逆流・悪臭が継続し、住民の一部で体調不良や生活環境悪化による避難希望が増加。高齢者世帯から追加で避難所搬送要請が入り、搬送班の再編成や搬送ルートの見直しが必要となっている。現場は冠水・浸水・悪臭が継続し、住民のストレスと健康被害リスクが高まっている。	避難希望者・要配慮者リストの早期更新、搬送・誘導班の迅速派遣と応援体制強化、冠水エリアでの安全な搬送手段（ボート・高床車等）の確保、避難所の衛生・健康管理体制強化、関係機関との連携徹底、住民への衛生・健康指導再徹底	平成25年台風18号時、同地域で床下浸水・下水逆流・悪臭が長期化し、避難希望世帯の搬送遅延や避難所での衛生問題が発生した事例あり。	['床下浸水継続による家財・設備被害', '下水逆流による衛生被害・健康被害（体調不良者の増加）', '避難希望者の増加による搬送遅延・安全確保困難']	['冠水長期化による孤立世帯の発生', '避難所での感染症・生活環境悪化', '支援班・搬送班の現場到着遅延']
		1-12	450	発災53分後	床下浸水・下水逆流・悪臭・避難希望者増加・追加搬送要請が継続し、現場では避難所の受け入れ余力が逼迫。行政本部から臨時避難所（サテライト避難所）開設準備の指示が出される。	行政（本部）	本部より『朝日一丁目9番地周辺の避難希望・体調不良者搬送が続く中、既存避難所の受け入れが満員に近づいている。追加の避難希望者や健康悪化者の一時待機場所として、近隣公共施設等を臨時避難所（サテライト避難所）として開設する準備を進めてほしい』との指示が現場班に入った。	既存の避難所は高齢者・体調不良者で満杯。現場は膝程度の冠水、床下10〜15cmの浸水、下水逆流・悪臭が継続。サテライト避難所候補は町内会館や小学校体育館など。避難希望世帯や要配慮者のリストアップが進行中。	淀川から約450mの低地。住宅密集地で南側が窪地となっており、水が集まりやすい。都市型排水能力を超えた状態が長期化しやすく、高齢者世帯も多い。	避難所過密・健康被害拡大時の臨時避難所開設判断・現場運用・住民誘導の実践訓練。多機関連携と情報共有の強化を狙う。	避難所過密時の臨時避難所設置判断、現場・本部・関係機関の調整、住民・要配慮者の安全確保、避難誘導・物資搬送・衛生管理体制の迅速構築。	サテライト避難所候補の現地確認・開設指示、避難誘導班・物資搬送班の編成と派遣、現場本部・既存避難所・関係機関（消防・警察・保健・福祉・ボランティア）との連携、住民・要配慮者リストの再整理と優先搬送、衛生・健康管理体制の確立、住民への広報・安全指導。	避難所過密による受け入れ遅延、臨時避難所開設準備の遅れ、物資・人員不足、住民の不安・混乱拡大、現場・本部間の情報伝達遅延、複数機関連携の混乱	道路は膝程度の冠水継続、床下10〜15cmの浸水、下水逆流・悪臭あり	床下浸水長期化・下水逆流・健康被害拡大・避難所過密・臨時避難所開設指示	床下浸水と下水逆流・悪臭が継続し、住民の一部で健康被害が拡大。既存避難所は満員となり、追加の避難希望・体調不良者対応のため、臨時避難所開設の判断・準備が必要となっている。現場は冠水・浸水・悪臭が継続し、住民の不安と健康リスクがさらに高まっている。	サテライト避難所の迅速な開設・運用、避難誘導・物資搬送班の強化、現場本部・既存避難所・関係機関との連携、要配慮者名簿の活用と優先救助・搬送、衛生・健康管理体制の確立、現場・本部間の情報共有徹底、住民への広報・安全指導の徹底	平成25年台風18号時、同地域で床下浸水・避難所過密・臨時避難所開設が必要となった事例あり。物資・人員不足や情報共有遅延による混乱が生じた。	['床下浸水継続による家財・ガス設備・給湯器被害', '下水逆流による衛生被害・健康被害（体調不良者発生）', '生活物資不足による住民の体調不良・不安拡大', '救急搬送困難による重症化リスク', '避難所過密・受け入れ遅延']	['冠水長期化による孤立世帯の発生', '感染症・生活環境悪化による体調不良者増加', '支援班・救助班・医療班・救急隊の現場到着遅延', '臨時避難所開設準備の遅れ・混乱']
		1-13	450	発災57分後	サテライト避難所（臨時避難所）の開設準備が本格化し、避難誘導・物資搬送・健康管理班の現場派遣が始まる。避難所間の連絡・調整、住民誘導・物資配布の現場オペレーションが求められる。	現場班（避難誘導・物資搬送・保健師）	朝日一丁目9番地周辺では、サテライト避難所の開設準備を進めるため、避難誘導班・物資搬送班・保健師班が現場に到着。既存避難所からの追加搬送希望者や要配慮者のリストアップを進めつつ、飲料水・簡易トイレ・衛生資材などの物資配布を開始。健康状態のチェックや避難所間の連絡も並行して実施している。	既存避難所は満員状態で、サテライト避難所（町内会館や学校体育館等）への住民誘導が本格化。搬送には徒歩・ボートを併用。保健師は健康相談・感染症予防指導も担当。現場と本部・避難所間の情報共有は無線・携帯で実施。	淀川から約450mの低地。住宅密集地で南側が窪地となっており、水が集まりやすい。都市型排水能力を超えた状態が長期化しやすく、高齢者世帯も多い。	臨時避難所運用下での多機関連携による避難誘導・物資搬送・健康管理体制の構築訓練。住民安全確保・衛生管理・優先順位判断・情報共有の強化を狙う。	避難所・サテライト避難所間の搬送・物資配布・健康管理の現場オペレーション、要配慮者・体調不良者の優先対応、複数部門連携の実践、現場と本部・避難所間の情報共有迅速化。	避難誘導・搬送班の現場展開、要配慮者・体調不良者リストの再整理・優先搬送、物資（飲料水・トイレ・衛生資材等）のサテライト避難所搬送・配布、保健師による健康チェック・感染症予防指導、現場と本部・避難所間の情報共有体制強化。	搬送・物資配布の遅延、搬送希望者の増加による現場混乱、要配慮者・体調不良者の個別対応の遅れ、複数機関間の調整・情報伝達の混乱、住民の不安拡大、夜間対応や停電時の活動困難	道路は膝程度の冠水が継続、床下10〜15cmの浸水、下水逆流・悪臭あり	床下浸水長期化・下水逆流・健康被害拡大・避難所過密・臨時避難所運用・多機関連携搬送・物資配布	床下浸水と下水逆流・悪臭が継続し、住民の一部で健康被害が拡大。既存避難所は満員、サテライト避難所への搬送・物資配布・健康管理が本格化。複数部門（避難誘導・物資搬送・保健師）が連携し、住民安全確保・衛生管理・優先搬送に取り組む現場運用が進む。	サテライト避難所の迅速な運用、避難誘導・物資搬送・健康管理班の現場展開・連携、要配慮者名簿の活用と優先救助・搬送、衛生・健康管理体制の確立、現場・本部・避難所間の情報共有徹底、住民への広報・安全指導の徹底	平成25年台風18号時、同地域で床下浸水・避難所過密・臨時避難所開設・多機関連携搬送・物資配布が必要となった事例あり。物資・人員不足や情報共有遅延による混乱が生じた。	['床下浸水継続による家財・ガス設備・給湯器被害', '下水逆流による衛生被害・健康被害（体調不良者発生）', '生活物資不足による住民の体調不良・不安拡大', '救急搬送困難による重症化リスク', '避難所過密・受け入れ遅延']	['冠水長期化による孤立世帯の発生', '感染症・生活環境悪化による体調不良者増加', '支援班・救助班・医療班・救急隊の現場到着遅延', '臨時避難所運用・物資配布の遅延・混乱']
		1-14	450	発災62分後	サテライト避難所の本格稼働に伴い、既存避難所・臨時避難所間での高齢者や体調不良者の優先搬送、医療物資の再配分調整が必要となる。	現場班（避難誘導・物資搬送・保健師）	朝日一丁目9番地周辺のサテライト避難所・既存避難所の双方で、体調不良者や高齢者の増加に伴い、解熱剤や消毒液、簡易ベッドなどの医療物資が不足し始めたとの現場報告。避難所間での物資再配分と、体調不良者の優先搬送・健康チェックが求められている。	避難所間の連絡は無線と携帯を併用。既存避難所・サテライト避難所ともに収容数が限界に近く、今後も追加搬送希望者が見込まれる。保健師は健康相談・感染症予防指導も担当。	淀川から約450mの低地。住宅密集地で南側が窪地となっており、水が集まりやすい。都市型排水能力を超えた状態が長期化しやすく、高齢者世帯も多い。	複数避難所運用下での医療・物資・人員配分の現場調整、多機関連携による健康被害抑制・優先順位判断・情報共有の実践力向上を狙う。	避難所間の物資・人員調整、体調不良者・高齢者の優先搬送・健康管理、現場班・本部・医療機関との情報共有・連携強化、住民安全確保・衛生維持。	医療物資・衛生資材の優先搬送、体調不良者・高齢者リストの再整理と優先搬送、保健師・医療スタッフの現場展開、避難所間・本部との情報共有、住民健康状態の把握・健康相談体制強化、関係機関（保健・福祉・医療・ボランティア）との連携調整。	医療物資・スタッフ不足、避難所間搬送・調整の遅延、健康被害拡大への即応困難、住民不安・混乱拡大、夜間・停電下での応急対応困難、複数機関連携の調整遅延	道路は膝程度の冠水継続、床下10〜15cmの浸水、下水逆流・悪臭あり	床下浸水長期化・下水逆流・健康被害拡大・避難所過密・臨時避難所運用・医療資源逼迫	床下浸水と下水逆流・悪臭が継続し、住民の一部で健康被害が拡大。既存避難所・サテライト避難所ともに満員に近く、医療スタッフ・医薬品の不足が深刻化。高齢者や体調不良者の優先搬送・健康管理、避難所間での医療物資再配分調整が必要となり、現場対応が逼迫している。	サテライト避難所の迅速な運用、避難誘導・物資搬送・健康管理班の現場展開強化、要配慮者名簿の活用と優先救助・搬送、衛生・健康管理体制の確立、現場・本部・避難所間の情報共有徹底、住民への広報・安全指導の徹底、医療機関との連携強化	平成25年台風18号時、同地域で床下浸水・避難所過密・臨時避難所開設・医療応援要請が必要となった事例あり。物資・人員不足や情報共有遅延による混乱が生じた。	['床下浸水継続による家財・ガス設備・給湯器被害', '下水逆流による衛生被害・健康被害（体調不良者発生）', '生活物資不足による住民の体調不良・不安拡大', '救急搬送困難による重症化リスク', '避難所過密・受け入れ遅延', '医療資源逼迫による健康被害拡大']	['冠水長期化による孤立世帯の発生', '感染症・生活環境悪化による体調不良者増加', '支援班・救助班・医療班・救急隊の現場到着遅延', '臨時避難所運用・物資配布の遅延・混乱']
		1-15	450	発災67分後	サテライト避難所・既存避難所ともに収容限界が近く、避難誘導や医療物資搬送の現場調整が続く中、夜間対応のための照明・電源確保、住民の夜間安否確認が課題となる。	現場班（避難誘導・物資搬送・保健師）	サテライト避難所・既存避難所の双方で、夜間に備えた照明・電源の不足が指摘されている。避難所間の搬送や物資配布は継続中だが、夜間の安全確保と住民の安否確認のため、追加の照明器具や発電機の手配、各世帯への巡回確認が必要との現場報告が入った。	現場は膝程度の冠水・床下10〜15cmの浸水が継続。避難所・サテライト避難所ともに満員に近く、夜間対応人員も限られている。高齢者・要配慮者世帯が多く、夜間の体調急変や転倒リスクも懸念される。	淀川から約450mの低地。住宅密集地で南側が窪地となっており、水が集まりやすい。都市型排水能力を超えた状態が長期化しやすく、高齢者世帯も多い。	夜間・停電時の避難所運営、現場安全管理、住民安否確認体制の実践訓練。多機関連携による夜間対応力と情報共有の強化を狙う。	夜間の照明・電源確保、避難所間・現場での住民安否確認、要配慮者・高齢者の夜間見守り体制、現場班・本部・関係機関間の連携強化。	照明器具・発電機の追加手配と搬送、夜間巡回班の編成・現場展開、避難所・現場での住民安否確認・体調チェック、関係機関（保健・福祉・ボランティア）との連携、夜間連絡体制の再確認。	照明・電源不足による安全確保困難、夜間巡回の人員不足、住民の体調急変・転倒事故の発見遅延、複数機関間での夜間情報共有の遅れ、住民不安の拡大	道路は膝程度の冠水継続、床下10〜15cmの浸水、下水逆流・悪臭あり	床下浸水長期化・下水逆流・健康被害拡大・避難所過密・夜間対応・照明電源不足	床下浸水と下水逆流・悪臭が継続。避難所・サテライト避難所ともに満員に近く、夜間に備えた照明・電源の不足が顕在化。夜間の住民安否確認や体調急変への対応体制が求められ、現場の安全確保が課題となっている。	夜間対応用照明・発電機の事前備蓄・迅速搬送、巡回班の夜間配置、要配慮者・高齢者見守り体制の強化、現場・本部・避難所間の夜間連絡体制徹底、住民への安全指導・体調急変時の連絡方法周知	平成25年台風18号時、同地域で夜間の照明・発電機不足、避難所・現場での安否確認遅延、体調急変時の発見遅れが報告されている。	['床下浸水継続による家財・ガス設備・給湯器被害', '下水逆流による衛生被害・健康被害（体調不良者発生）', '生活物資不足による住民の体調不良・不安拡大', '夜間・停電下での事故・体調急変の発見遅延', '避難所過密・受け入れ遅延', '医療資源逼迫による健康被害拡大']	['冠水長期化による孤立世帯の発生', '感染症・生活環境悪化による体調不良者増加', '支援班・救助班・医療班・救急隊の現場到着遅延', '臨時避難所運用・物資配布の遅延・混乱', '夜間対応困難による住民不安の拡大']
		1-16	450	発災72分後	夜間を迎える現場で、避難所・サテライト避難所の満員状態が継続し、追加の体調不良者や高齢者の搬送希望が複数世帯から寄せられる。医療スタッフ・物資・照明機器の追加手配が必要となり、現場班・本部間の調整が求められる。	本部（医療・物資調整班）	『避難所・サテライト避難所ともに満杯状態が続き、夜間に入り体調不良を訴える高齢者や搬送希望者がさらに増加。医療スタッフ・医薬品・照明機器の追加派遣、搬送車両の増強が必要』との現場からの要請が本部に複数入っている。	搬送希望者は高齢者・体調不良者を中心に4世帯以上。夜間対応のための照明や発電機も不足しつつあり、現場班の人員も限界に近い。既存避難所・サテライト避難所の収容数は限界に達している。	淀川から約450mの低地で住宅密集地。南側が窪地となっており、水が集まりやすい。都市型排水能力を超えた状態が長期化しやすく、高齢者世帯も多い。	夜間・医療資源逼迫時の多機関連携による応急対応、追加物資・人員手配、現場調整・優先順位判断・情報共有体制の強化を訓練する。	医療スタッフ・物資・照明機器の迅速な追加手配、体調不良者・高齢者の優先搬送、夜間の現場安全確保、本部・現場・避難所間の連携・情報共有の実践。	追加の医療スタッフ・医薬品・照明機器の手配と搬送、体調不良者・高齢者のリスト再整理と優先搬送指示、夜間の現場安全管理体制の強化、現場班・本部・避難所間の情報共有・連絡体制の再確認、住民への健康・安全指導の徹底。	医療スタッフ・物資の不足、夜間・停電下での搬送・応急対応の困難、複数機関間の調整・情報伝達の遅延、住民不安・混乱の拡大、体調急変や転倒事故の発見遅延	道路は引き続き膝程度の冠水継続、床下10〜15cmの浸水、下水逆流・悪臭も継続中	床下浸水長期化・下水逆流・健康被害拡大・避難所過密・夜間対応・医療資源逼迫・追加搬送要請	床下浸水と下水逆流・悪臭が継続し、夜間に入り体調不良者や高齢者の搬送希望がさらに増加。避難所・サテライト避難所ともに満員で、医療スタッフ・医薬品・照明機器の不足が深刻化。現場班・本部間の調整が逼迫し、夜間の安全確保と迅速な応急対応が課題となっている。	医療スタッフ・医薬品・照明機器の事前備蓄・迅速搬送、夜間巡回班の配置強化、要配慮者・高齢者見守り体制の徹底、現場・本部・避難所間の情報共有体制強化、住民への健康・安全指導・体調急変時の連絡方法周知、医療機関・ボランティアとの連携強化	平成25年台風18号時、同地域で夜間の照明・発電機・医療資源不足、避難所・現場での安否確認遅延、体調急変時の発見遅れや搬送困難が報告されている。	['床下浸水継続による家財・ガス設備・給湯器被害', '下水逆流による衛生被害・健康被害（体調不良者発生）', '生活物資不足・医療資源逼迫による住民の体調不良・不安拡大', '夜間・停電下での事故・体調急変の発見遅延', '避難所過密・受け入れ遅延', '追加搬送希望者の増加による対応遅延']	['冠水長期化による孤立世帯の発生', '感染症・生活環境悪化による体調不良者増加', '支援班・救助班・医療班・救急隊の現場到着遅延', '臨時避難所運用・物資配布の遅延・混乱', '夜間対応困難による住民不安の拡大']
		1-17	450	発災80分後	夜間対応が続く中、避難所・サテライト避難所で体調不良者や高齢者の搬送希望がさらに増加し、医療スタッフ・医薬品・照明機器・搬送車両の追加手配、現場班・本部・関係機関間の優先順位付けと調整が求められる。	本部（医療・現場調整班）	『避難所・サテライト避難所で体調不良者や高齢者の増加が続き、応急手当や健康管理のための医療スタッフ・医薬品・搬送車両が引き続き不足している。夜間対応のため照明・発電機の追加手配も必要。現場班・本部・関係機関で優先順位を再確認し、搬送・応急対応の調整を強化する必要あり』との報告。	搬送希望者リストは増加傾向。夜間対応のための照明・発電機は一部現場に到着済みだが、全避難所への配備は未了。医療スタッフ・保健師の現場展開も継続的に調整中。	淀川から約450mの低地で住宅密集地。南側が窪地となっており、水が集まりやすい。都市型排水能力を超えた状態が長期化しやすく、高齢者世帯も多い。	医療資源逼迫・夜間対応下での多機関連携による優先順位判断・現場調整・情報共有の徹底訓練。現場主導による応急対応力・調整力の強化を狙う。	医療物資・スタッフ・搬送車両の追加手配と現場調整、夜間対応体制の再点検、優先順位判断・情報共有の徹底、住民健康管理と安全維持。	医療スタッフ・医薬品・搬送車両・照明機器・発電機の追加手配、体調不良者・高齢者リストの再整理と優先搬送、現場班と本部・関係機関（保健・福祉・医療・ボランティア）との連携強化、夜間の安全確保・健康相談体制の強化、住民への健康・安全指導の再徹底。	医療スタッフ・物資・搬送車両の不足、夜間・停電下での応急対応困難、優先順位判断の混乱、住民不安・混乱拡大、複数機関連携の調整遅延、体調急変や事故への即応困難	道路は膝程度の冠水が継続、床下10〜15cmの浸水、下水逆流・悪臭も継続中	床下浸水長期化・下水逆流・健康被害拡大・避難所過密・夜間対応・医療資源逼迫・追加搬送要請	床下浸水と下水逆流・悪臭が継続し、夜間に入り体調不良者や高齢者の搬送希望がさらに増加。避難所・サテライト避難所ともに満員で、医療スタッフ・医薬品・照明機器の不足が深刻化。現場班・本部間の調整が逼迫し、夜間の安全確保と迅速な応急対応が課題となっている。	医療スタッフ・医薬品・照明機器の事前備蓄・迅速搬送、夜間巡回班の配置強化、要配慮者・高齢者見守り体制の徹底、現場・本部・避難所間の情報共有体制強化、住民への健康・安全指導・体調急変時の連絡方法周知、医療機関・ボランティアとの連携強化	平成25年台風18号時、同地域で夜間の照明・発電機・医療資源不足、避難所・現場での安否確認遅延、体調急変時の発見遅れや搬送困難が報告されている。	['床下浸水継続による家財・ガス設備・給湯器被害', '下水逆流による衛生被害・健康被害（体調不良者発生）', '生活物資不足・医療資源逼迫による住民の体調不良・不安拡大', '夜間・停電下での事故・体調急変の発見遅延', '避難所過密・受け入れ遅延', '追加搬送希望者の増加による対応遅延']	['冠水長期化による孤立世帯の発生', '感染症・生活環境悪化による体調不良者増加', '支援班・救助班・医療班・救急隊の現場到着遅延', '臨時避難所運用・物資配布の遅延・混乱', '夜間対応困難による住民不安の拡大']
		1-18	450	発災83分後	夜間対応が続く中、避難所・サテライト避難所の現場で体調不良者・高齢者の追加搬送希望が継続し、医療スタッフ・照明機器・搬送車両の配備状況や応急対応の優先順位確認のため、現場班・本部間の緊急調整会議が招集される。	本部（現場調整班）	『避難所・サテライト避難所で体調不良者や高齢者の追加搬送希望が続いている。夜間対応のための照明・発電機・医療スタッフ・搬送車両の配備状況を現場班から至急報告し、応急対応の優先順位を再確認するための緊急オンライン会議を開催する』との本部指示が現場班に発信された。	照明・発電機の一部は現場到着済みだが、全避難所への配備は未了。医療スタッフ・保健師の現場展開も調整中。搬送希望者リストは増加傾向。現場と本部・関係機関の連携が重要となっている。	淀川から約450mの低地で住宅密集地。南側が窪地となっており、水が集まりやすい。都市型排水能力を超えた状態が長期化しやすく、高齢者世帯も多い。	医療資源逼迫・夜間対応下での現場と本部・関係機関の優先順位判断・情報共有・応急対応体制強化を訓練する。	現場リーダー・本部・関係機関による情報共有と優先順位判断、医療スタッフ・照明機器・搬送車両の追加手配状況の把握、夜間の応急対応体制の再構築。	現場班から最新の搬送希望者・体調不良者リストと資機材配備状況を本部へ即時報告、緊急会議で優先順位を協議し応急対応を再指示、医療・照明・搬送資機材の追加手配、夜間巡回班の再編成、住民への健康・安全指導の徹底。	医療スタッフ・物資・搬送車両・照明機器の不足、夜間・停電下での応急対応困難、優先順位判断の混乱、現場と本部・関係機関間の情報伝達遅延、住民不安・混乱拡大、体調急変や事故への即応困難	道路は膝程度の冠水が継続、床下10〜15cmの浸水、下水逆流・悪臭も継続中	床下浸水長期化・下水逆流・健康被害拡大・避難所過密・夜間対応・医療資源逼迫・追加搬送要請	床下浸水と下水逆流・悪臭が継続。夜間に入り体調不良者や高齢者の搬送希望がさらに増加。避難所・サテライト避難所ともに満員で、医療スタッフ・医薬品・照明機器の不足が深刻化。現場班・本部間の調整が逼迫し、夜間の安全確保と迅速な応急対応が課題となっている。	医療スタッフ・医薬品・照明機器の事前備蓄・迅速搬送、夜間巡回班の配置強化、要配慮者・高齢者見守り体制の徹底、現場・本部・避難所間の情報共有体制強化、住民への健康・安全指導・体調急変時の連絡方法周知、医療機関・ボランティアとの連携強化	平成25年台風18号時、同地域で夜間の照明・発電機・医療資源不足、避難所・現場での安否確認遅延、体調急変時の発見遅れや搬送困難が報告されている。	['床下浸水継続による家財・ガス設備・給湯器被害', '下水逆流による衛生被害・健康被害（体調不良者発生）', '生活物資不足・医療資源逼迫による住民の体調不良・不安拡大', '夜間・停電下での事故・体調急変の発見遅延', '避難所過密・受け入れ遅延', '追加搬送希望者の増加による対応遅延']	['冠水長期化による孤立世帯の発生', '感染症・生活環境悪化による体調不良者増加', '支援班・救助班・医療班・救急隊の現場到着遅延', '臨時避難所運用・物資配布の遅延・混乱', '夜間対応困難による住民不安の拡大']
		1-19	450	発災86分後	夜間対応が続く中、避難所・サテライト避難所で体調不良者・高齢者の追加搬送希望が増加し、医療スタッフ・照明機器・搬送車両の配備状況や応急対応の優先順位確認のため、現場班・本部・関係機関による夜間緊急ミーティングが開催される。	本部（現場調整班）	『避難所・サテライト避難所で体調不良者や高齢者の搬送希望がさらに増加している。夜間対応のための照明・発電機・医療スタッフ・搬送車両の配備状況を現場班から至急報告し、応急対応の優先順位を再確認するため、現場班・本部・関係機関の夜間緊急ミーティングを開催する』との連絡が本部から現場班に入った。	照明・発電機は一部現場に到着済みだが、全避難所への配備は未了。医療スタッフ・保健師の現場展開も調整中。搬送希望者リストは増加傾向。現場と本部・関係機関の連携が重要となっている。	淀川から約450mの低地で住宅密集地。南側が窪地となっており、水が集まりやすい。都市型排水能力を超えた状態が長期化しやすく、高齢者世帯も多い。	医療資源逼迫・夜間対応下での現場と本部・関係機関の優先順位判断・情報共有・応急対応体制強化を訓練する。	現場リーダー・本部・関係機関による情報共有と優先順位判断、医療スタッフ・照明機器・搬送車両の追加手配状況の把握、夜間の応急対応体制の再構築。	現場班から最新の搬送希望者・体調不良者リストと資機材配備状況を本部へ即時報告、緊急会議で優先順位を協議し応急対応を再指示、医療・照明・搬送資機材の追加手配、夜間巡回班の再編成、住民への健康・安全指導の徹底。	医療スタッフ・物資・搬送車両・照明機器の不足、夜間・停電下での応急対応困難、優先順位判断の混乱、現場と本部・関係機関間の情報伝達遅延、住民不安・混乱拡大、体調急変や事故への即応困難	道路は膝程度の冠水が継続、床下10〜15cmの浸水、下水逆流・悪臭も継続中	床下浸水長期化・下水逆流・健康被害拡大・避難所過密・夜間対応・医療資源逼迫・追加搬送要請	床下浸水と下水逆流・悪臭が継続。夜間に入り体調不良者や高齢者の搬送希望がさらに増加。避難所・サテライト避難所ともに満員で、医療スタッフ・医薬品・照明機器の不足が深刻化。現場班・本部間の調整が逼迫し、夜間の安全確保と迅速な応急対応が課題となっている。	医療スタッフ・医薬品・照明機器の事前備蓄・迅速搬送、夜間巡回班の配置強化、要配慮者・高齢者見守り体制の徹底、現場・本部・避難所間の情報共有体制強化、住民への健康・安全指導・体調急変時の連絡方法周知、医療機関・ボランティアとの連携強化	平成25年台風18号時、同地域で夜間の照明・発電機・医療資源不足、避難所・現場での安否確認遅延、体調急変時の発見遅れや搬送困難が報告されている。	['床下浸水継続による家財・ガス設備・給湯器被害', '下水逆流による衛生被害・健康被害（体調不良者発生）', '生活物資不足・医療資源逼迫による住民の体調不良・不安拡大', '夜間・停電下での事故・体調急変の発見遅延', '避難所過密・受け入れ遅延', '追加搬送希望者の増加による対応遅延']	['冠水長期化による孤立世帯の発生', '感染症・生活環境悪化による体調不良者増加', '支援班・救助班・医療班・救急隊の現場到着遅延', '臨時避難所運用・物資配布の遅延・混乱', '夜間対応困難による住民不安の拡大']
		1-20	450	発災95分後	夜間対応が続く中、避難所・サテライト避難所で体調不良者・高齢者の追加搬送希望が引き続き増加し、現場班・本部・関係機関で応急対応の優先順位協議と医療資源・照明機器の再配分調整が行われる。	本部（現場調整班）	『避難所・サテライト避難所で体調不良者や高齢者の搬送希望が増加している。照明・発電機・医療スタッフ・搬送車両の配備状況を再確認し、応急対応の優先順位を現場班・本部・関係機関で協議、医療物資・照明機器の再配分を実施する』との連絡が現場班に入った。	夜間の気温が低下し、待機中の高齢者・体調不良者の搬送希望が複数世帯から追加発生。照明・発電機のバッテリー残量が低下し始めている現場もある。医療スタッフ・保健師の現場展開は継続的に調整中。	淀川から約450mの低地で住宅密集地。南側が窪地となっており、水が集まりやすい。都市型排水能力を超えた状態が長期化しやすく、高齢者世帯も多い。	夜間・医療資源逼迫下での現場と本部・関係機関の優先順位判断・応急対応体制強化、資機材マネジメント・多機関連携の実践訓練。	優先順位判断に基づく応急対応指示、医療スタッフ・照明機器・搬送車両の再配分調整、現場班・本部・関係機関の迅速な情報共有と現場リーダーの調整力。	最新の搬送希望者・体調不良者リストと資機材配備状況の本部報告、緊急会議で優先順位協議・応急対応指示、医療・照明・搬送資機材の再配分と追加手配、夜間巡回班の再編成、住民への健康・安全指導の徹底。	医療スタッフ・物資・搬送車両・照明機器の不足、夜間・停電下での応急対応困難、優先順位判断・資機材配分の混乱、現場と本部・関係機関間の情報伝達遅延、住民不安・体調急変への即応困難	道路は膝程度の冠水が継続、床下10〜15cmの浸水、下水逆流・悪臭も継続中	床下浸水長期化・下水逆流・健康被害拡大・避難所過密・夜間対応・医療資源逼迫・追加搬送要請	床下浸水と下水逆流・悪臭が継続。夜間に入り体調不良者や高齢者の搬送希望がさらに増加。避難所・サテライト避難所ともに満員で、医療スタッフ・医薬品・照明機器の不足が深刻化。現場班・本部間の調整が逼迫し、夜間の安全確保と迅速な応急対応が課題となっている。	医療スタッフ・医薬品・照明機器の事前備蓄・迅速搬送、夜間巡回班の配置強化、要配慮者・高齢者見守り体制の徹底、現場・本部・避難所間の情報共有体制強化、住民への健康・安全指導・体調急変時の連絡方法周知、医療機関・ボランティアとの連携強化	平成25年台風18号時、同地域で夜間の照明・発電機・医療資源不足、避難所・現場での安否確認遅延、体調急変時の発見遅れや搬送困難が報告されている。	['床下浸水継続による家財・ガス設備・給湯器被害', '下水逆流による衛生被害・健康被害（体調不良者発生）', '生活物資不足・医療資源逼迫による住民の体調不良・不安拡大', '夜間・停電下での事故・体調急変の発見遅延', '避難所過密・受け入れ遅延', '追加搬送希望者の増加による対応遅延']	['冠水長期化による孤立世帯の発生', '感染症・生活環境悪化による体調不良者増加', '支援班・救助班・医療班・救急隊の現場到着遅延', '臨時避難所運用・物資配布の遅延・混乱', '夜間対応困難による住民不安の拡大']
		1-21	450	発災96分後	夜間対応が継続する中、避難所・サテライト避難所の現場では体調不良者・高齢者の健康観察と夜間巡回、資機材（照明・発電機等）のバッテリー残量確認、搬送希望者リストの最新化が求められている。	現場班（避難誘導・保健師）	『避難所・サテライト避難所で体調不良者や高齢者の健康観察、夜間巡回を継続中。新たな急変者は現時点で発生していないが、搬送希望者リストがさらに増加。照明・発電機のバッテリー残量が低下し始めている現場があり、追加手配も必要』との報告が本部に入っている。	夜間で気温が低下傾向。健康相談・応急手当のニーズが高く、医療スタッフ・保健師の現場展開が継続中。搬送希望者の優先順位付けは本部と連携して実施。照明・発電機のバッテリー残量が心配な現場もある。	淀川から約450mの低地で住宅密集地。南側が窪地となっており、水が集まりやすい。都市型排水能力を超えた状態が長期化しやすく、高齢者世帯も多い。	夜間・医療資源逼迫下での現場主導による健康観察・搬送調整・資機材管理体制の徹底訓練。住民の体調急変・安全確保、現場と本部・関係機関の連携強化を狙う。	夜間健康観察・巡回体制の維持、搬送希望者の優先順位付け、照明・発電機等の資機材管理・追加手配、現場と本部・関係機関の迅速な情報共有。現場リーダーの判断・調整力がポイント。	現場班による定時の健康観察・夜間巡回、搬送希望者リストの本部共有と優先順位付け、照明・発電機のバッテリー点検・追加手配、急変時の応急対応準備、住民への健康・安全指導、現場と本部・関係機関の情報共有体制強化。	医療スタッフ・資機材の不足、夜間・停電下での健康観察・応急対応の困難、搬送希望者の増加による調整遅延、現場と本部・関係機関間の情報伝達遅延、住民不安・混乱拡大、体調急変や事故への即応困難	道路は膝程度の冠水が継続、床下10〜15cmの浸水、下水逆流・悪臭も継続中	床下浸水長期化・下水逆流・健康被害拡大・避難所過密・夜間対応・医療資源逼迫・追加搬送要請	床下浸水と下水逆流・悪臭が継続。夜間に入り体調不良者や高齢者の搬送希望がさらに増加。避難所・サテライト避難所ともに満員で、医療スタッフ・医薬品・照明機器の不足が深刻化。現場班・本部間の調整が逼迫し、夜間の安全確保と迅速な応急対応が課題となっている。	医療スタッフ・医薬品・照明機器の事前備蓄・迅速搬送、夜間巡回班の配置強化、要配慮者・高齢者見守り体制の徹底、現場・本部・避難所間の情報共有体制強化、住民への健康・安全指導・体調急変時の連絡方法周知、医療機関・ボランティアとの連携強化	平成25年台風18号時、同地域で夜間の照明・発電機・医療資源不足、避難所・現場での安否確認遅延、体調急変時の発見遅れや搬送困難が報告されている。	['床下浸水継続による家財・ガス設備・給湯器被害', '下水逆流による衛生被害・健康被害（体調不良者発生）', '生活物資不足・医療資源逼迫による住民の体調不良・不安拡大', '夜間・停電下での事故・体調急変の発見遅延', '避難所過密・受け入れ遅延', '追加搬送希望者の増加による対応遅延']	['冠水長期化による孤立世帯の発生', '感染症・生活環境悪化による体調不良者増加', '支援班・救助班・医療班・救急隊の現場到着遅延', '臨時避難所運用・物資配布の遅延・混乱', '夜間対応困難による住民不安の拡大']
		1-22	450	発災101分後	夜間対応が継続する中、避難所・サテライト避難所の現場では体調不良者・高齢者の健康観察と夜間巡回が続けられている。新たな急変者は現時点で発生していないが、照明・発電機のバッテリー残量が限界に近づきつつあり、追加手配の準備が必要となっている。	現場班（避難誘導・保健師）	『避難所・サテライト避難所で体調不良者や高齢者の健康観察、夜間巡回を継続中。新たな急変者は発生していないが、照明・発電機のバッテリー残量が低下し、追加手配の準備を進めている』との現場班からの報告が本部に入った。	夜間の冷え込みが続き、健康相談や応急手当のニーズが高い。医療スタッフ・保健師は引き続き現場展開中。搬送希望者リストの優先順位付けも本部と連携して実施中。	淀川から約450mの低地で住宅密集地。南側が窪地となっており、水が集まりやすい。都市型排水能力を超えた状態が長期化しやすく、高齢者世帯も多い。	夜間・医療資源逼迫下での現場主導による健康観察・資機材管理・搬送調整体制の継続訓練。現場リーダーの判断力・本部との連携強化を狙う。	夜間健康観察・巡回体制の維持、資機材（照明・発電機等）の残量管理・追加手配準備、現場と本部・関係機関の情報共有徹底、急変時の初動対応準備。	現場班による定時の健康観察・夜間巡回、照明・発電機のバッテリー点検・追加手配準備、搬送希望者リストと健康状態の本部共有、急変時の応急対応体制確認、住民への健康・安全指導、現場と本部・関係機関の情報共有体制維持。	医療スタッフ・資機材の不足、夜間・停電下での健康観察・応急対応の困難、資機材追加手配の遅延、現場と本部・関係機関間の情報伝達遅延、住民不安・混乱拡大、体調急変や事故への即応困難	道路は膝程度の冠水が継続、床下10〜15cmの浸水、下水逆流・悪臭も継続中	床下浸水長期化・下水逆流・健康被害拡大・避難所過密・夜間対応・医療資源逼迫	床下浸水と下水逆流・悪臭が継続。夜間に入り体調不良者や高齢者の搬送希望がさらに増加。避難所・サテライト避難所ともに満員で、医療スタッフ・医薬品・照明機器の不足が深刻化。現場班・本部間の調整が逼迫し、夜間の安全確保と迅速な応急対応が課題となっている。	医療スタッフ・医薬品・照明機器の事前備蓄・迅速搬送、夜間巡回班の配置強化、要配慮者・高齢者見守り体制の徹底、現場・本部・避難所間の情報共有体制強化、住民への健康・安全指導・体調急変時の連絡方法周知、医療機関・ボランティアとの連携強化	平成25年台風18号時、同地域で夜間の照明・発電機・医療資源不足、避難所・現場での安否確認遅延、体調急変時の発見遅れや搬送困難が報告されている。	['床下浸水継続による家財・ガス設備・給湯器被害', '下水逆流による衛生被害・健康被害（体調不良者発生）', '生活物資不足・医療資源逼迫による住民の体調不良・不安拡大', '夜間・停電下での事故・体調急変の発見遅延', '避難所過密・受け入れ遅延', '追加搬送希望者の増加による対応遅延']	['冠水長期化による孤立世帯の発生', '感染症・生活環境悪化による体調不良者増加', '支援班・救助班・医療班・救急隊の現場到着遅延', '臨時避難所運用・物資配布の遅延・混乱', '夜間対応困難による住民不安の拡大']
		1-23	450	発災107分後	夜間対応が続く中、避難所・サテライト避難所の現場では体調不良者・高齢者の健康観察・夜間巡回が継続されている。照明・発電機のバッテリー残量がさらに低下し、一部現場で照明の明るさが不足し始めている。	現場班（避難誘導・保健師）	『避難所・サテライト避難所で体調不良者や高齢者の健康観察、夜間巡回を継続中。新たな急変者は発生していないが、照明や発電機のバッテリー残量がさらに低下し、一部現場では照明が暗くなってきている。追加手配の資機材はまだ到着していない』との現場班からの報告が本部に入った。	現場は夜間の冷え込みが続き、健康相談や応急手当のニーズが高い。照明・発電機の追加手配は本部で調整中。住民の不安や安全確保への懸念が高まっている。	淀川から約450mの低地で住宅密集地。南側が窪地となっており、水が集まりやすい。都市型排水能力を超えた状態が長期化しやすく、高齢者世帯も多い。	夜間・資機材不足時の現場対応力・住民安全確保・情報共有・応急体制維持を訓練する。	照明・発電機など資機材の管理・追加手配、暗所での健康観察・安全確保、現場と本部・関係機関の迅速な情報共有、住民の不安対応と安全指導。	現場班による照明・発電機のバッテリー点検・住民への安全指導、手持ちライトや誘導灯の活用、健康観察・夜間巡回の継続、追加資機材到着までの応急体制維持、本部・関係機関への状況報告と連携強化。	照明・発電機のバッテリー切れによる夜間対応困難、暗闇下での健康観察・応急手当の遅延、住民不安・混乱拡大、追加資機材到着遅延による安全確保の困難	道路は膝程度の冠水が継続、床下10〜15cmの浸水、下水逆流・悪臭も継続中	床下浸水長期化・下水逆流・健康被害拡大・避難所過密・夜間対応・資機材不足	床下浸水と下水逆流・悪臭が継続。夜間に入り体調不良者や高齢者の健康観察・夜間巡回が続く中、照明・発電機のバッテリー残量がさらに低下し、一部現場で照明が不足。住民の不安や安全確保への懸念が高まっている。	照明・発電機等の資機材管理・追加手配、手持ちライトや誘導灯の応急活用、夜間巡回・健康観察体制の強化、情報共有体制の強化、住民への安全指導と体調急変時の連絡方法周知	平成25年台風18号時、同地域で夜間の照明・発電機不足、避難所・現場での安否確認遅延、体調急変時の発見遅れが報告されている。	['床下浸水継続による家財・ガス設備・給湯器被害', '下水逆流による衛生被害・健康被害（体調不良者発生）', '生活物資不足・医療資源逼迫による住民の体調不良・不安拡大', '夜間・停電下での事故・体調急変の発見遅延', '避難所過密・受け入れ遅延', '追加搬送希望者の増加による対応遅延', '照明・発電機バッテリー切れによる夜間対応困難']	['冠水長期化による孤立世帯の発生', '感染症・生活環境悪化による体調不良者増加', '支援班・救助班・医療班・救急隊の現場到着遅延', '臨時避難所運用・物資配布の遅延・混乱', '夜間対応困難による住民不安の拡大']
		1-24	450	発災113分後	夜間対応が続く中、避難所・サテライト避難所で照明・発電機のバッテリー切れが発生し始め、現場班は手持ちライトや誘導灯を使った応急照明で健康観察・夜間巡回・見守りを継続。住民の転倒・事故リスクが高まっている。	現場班（避難誘導・保健師）	『避難所・サテライト避難所の一部で照明・発電機のバッテリーが切れ、手持ちライトや誘導灯で夜間巡回・健康観察を継続中。暗闇の中で住民の転倒や体調急変リスクが高まっている。追加資機材はまだ到着していない』との現場班からの報告が本部に入った。	現場は夜間の冷え込みが続き、健康相談や応急手当のニーズが高い。住民の不安や安全確保への懸念がさらに高まっており、追加の照明・発電機は本部で手配中だが道路冠水で搬入が遅れている。	淀川から約450mの低地で住宅密集地。南側が窪地となっており、水が集まりやすい。都市型排水能力を超えた状態が長期化しやすく、高齢者世帯も多い。夜間は特に安全管理が課題。	夜間・資機材不足下での応急対応力・現場判断力・住民安全確保・本部連携の実践訓練。	資機材不足時の応急照明・誘導灯活用、夜間巡回・健康観察・住民安全指導、現場と本部間の情報共有・追加要請、住民不安・転倒リスク管理。	手持ちライト・誘導灯を活用した夜間巡回・健康観察、住民への夜間移動制限・転倒防止策の徹底、追加資機材到着までの応急体制維持、本部への状況報告・追加要請、住民への安全・健康指導。	照明・発電機不足による夜間対応困難、暗闇下での健康観察・応急手当の遅延、住民の転倒・事故・不安拡大、追加資機材搬入遅延による対応力低下	道路は膝程度の冠水が継続、床下10〜15cmの浸水、下水逆流・悪臭も継続中	床下浸水長期化・下水逆流・健康被害拡大・避難所過密・夜間対応・資機材不足	床下浸水と下水逆流・悪臭が継続。夜間に入り照明・発電機のバッテリー切れが発生し、手持ち資機材による応急照明で夜間巡回・健康観察を継続。住民の転倒や体調急変リスクが高まっている。	照明・発電機等の資機材管理・追加手配、手持ちライトや誘導灯の応急活用、夜間巡回・健康観察体制の強化、住民への安全指導・夜間移動制限・体調急変時の連絡方法周知、情報共有体制の強化	平成25年台風18号時、同地域で夜間の照明・発電機不足、避難所・現場での安否確認遅延、体調急変時の発見遅れが報告されている。	['床下浸水継続による家財・ガス設備・給湯器被害', '下水逆流による衛生被害・健康被害（体調不良者発生）', '生活物資不足・医療資源逼迫による住民の体調不良・不安拡大', '夜間・停電下での事故・体調急変の発見遅延', '避難所過密・受け入れ遅延', '追加搬送希望者の増加による対応遅延', '照明・発電機バッテリー切れによる夜間対応困難']	['冠水長期化による孤立世帯の発生', '感染症・生活環境悪化による体調不良者増加', '支援班・救助班・医療班・救急隊の現場到着遅延', '臨時避難所運用・物資配布の遅延・混乱', '夜間対応困難による住民不安の拡大']
		1-25	450	発災118分後	避難所・サテライト避難所で照明・発電機のバッテリー切れが続き、手持ちライトや誘導灯による応急照明で夜間巡回・健康観察・見守りを継続。住民の転倒や体調急変リスクが一段と高まっている。	現場班（避難誘導・保健師）	『照明・発電機のバッテリー切れが続き、現場では手持ちライトや誘導灯で最低限の明かりを確保しながら夜間巡回・健康観察を続行中。住民からは暗闇や寒さへの不安の声が増え、転倒や体調急変のリスクが高まっている。追加資機材は依然到着せず、現場対応力の維持に努めている』との現場班からの報告。	現場は夜間の冷え込みが続き、健康相談や応急手当のニーズが高い。住民の不安や安全確保への懸念がさらに高まっており、追加の照明・発電機は本部で手配中だが、道路冠水のため搬入が遅延している。転倒事故や体調急変時の連絡方法は現場で再周知済み。	淀川から約450mの低地で住宅密集地。南側が窪地となっており、水が集まりやすい。都市型排水能力を超えた状態が長期化しやすく、高齢者世帯も多い。夜間は特に安全管理が課題。	資機材不足・夜間下での現場主導による応急対応、住民安全確保、情報共有・工夫力の強化訓練。現場リーダーの判断力・連携力、住民の安全対策徹底を狙う。	照明・発電機不足時の現場運用の工夫、暗所での健康観察・応急手当継続、住民転倒事故等のリスク管理、現場と本部・関係機関の情報共有と追加資機材要請の徹底。	現場班による手持ち照明・誘導灯の最大活用、住民の夜間移動制限や転倒防止策の徹底、健康観察・応急手当の継続、本部への追加資機材要請・状況報告、住民への安全指導・不安解消の声かけ。	資機材不足による応急対応力の低下、暗闇下での転倒事故や健康観察の遅延、住民の不安・混乱拡大、追加資機材搬入の遅延、現場と本部間の情報伝達遅延	道路は膝程度の冠水が継続、床下10〜15cmの浸水、下水逆流・悪臭も継続中	床下浸水長期化・下水逆流・健康被害拡大・避難所過密・夜間対応・資機材不足	床下浸水と下水逆流・悪臭が継続。夜間に入り照明・発電機のバッテリー切れが発生し、手持ち資機材による応急照明で夜間巡回・健康観察を継続。住民の転倒や体調急変リスクが高まっている。	照明・発電機等の資機材管理・追加手配、手持ちライトや誘導灯の応急活用、夜間巡回・健康観察体制の強化、住民への安全指導・夜間移動制限・体調急変時の連絡方法周知、情報共有体制の強化	平成25年台風18号時、同地域で夜間の照明・発電機不足、避難所・現場での安否確認遅延、体調急変時の発見遅れが報告されている。	['床下浸水継続による家財・ガス設備・給湯器被害', '下水逆流による衛生被害・健康被害（体調不良者発生）', '生活物資不足・医療資源逼迫による住民の体調不良・不安拡大', '夜間・停電下での事故・体調急変の発見遅延', '避難所過密・受け入れ遅延', '追加搬送希望者の増加による対応遅延', '照明・発電機バッテリー切れによる夜間対応困難']	['冠水長期化による孤立世帯の発生', '感染症・生活環境悪化による体調不良者増加', '支援班・救助班・医療班・救急隊の現場到着遅延', '臨時避難所運用・物資配布の遅延・混乱', '夜間対応困難による住民不安の拡大']
		1-26	450	発災122分後	照明・発電機のバッテリー切れが続く中、避難所・サテライト避難所では手持ちライトや誘導灯のみで夜間巡回・健康観察・住民見守りを継続。住民の転倒や体調急変リスクが一段と高まっているため、現場では夜間移動制限の再徹底と応急手当マニュアルの再確認が実施されている。	現場班（避難誘導・保健師）	『照明・発電機のバッテリー切れが続き、現場では手持ちライトや誘導灯のみで夜間巡回・健康観察・住民見守りを継続中。住民の一部からは暗闇や寒さへの不安、転倒や体調急変のリスクについての相談が増えている。追加資機材は依然到着していない』との現場班からの報告。	夜間の冷え込みが続き、健康相談や応急手当のニーズが高い。転倒事故や体調急変時の連絡方法は現場で再周知済み。追加照明・発電機は本部で手配中だが道路冠水で搬入が遅延。	淀川から約450mの低地で住宅密集地。南側が窪地となっており、水が集まりやすい。都市型排水能力を超えた状態が長期化しやすく、高齢者世帯も多い。夜間は特に安全管理が課題。	資機材不足・夜間下での現場主導による応急対応、住民安全確保、情報共有・工夫力の強化訓練。現場リーダーの判断力・連携力、住民の安全対策徹底を狙う。	資機材不足時の応急照明・誘導灯活用、夜間巡回・健康観察・住民安全指導、現場と本部・関係機関の情報共有・追加要請、住民不安・転倒リスク管理。	現場班による手持ち照明・誘導灯の最大活用、住民の夜間移動制限や転倒防止策の徹底、健康観察・応急手当の継続、本部への追加資機材要請・状況報告、住民への安全指導・不安解消の声かけ。	資機材不足による応急対応力の低下、暗闇下での転倒事故や健康観察の遅延、住民の不安・混乱拡大、追加資機材搬入の遅延、現場と本部間の情報伝達遅延	道路は膝程度の冠水が継続、床下10〜15cmの浸水、下水逆流・悪臭も継続中	床下浸水長期化・下水逆流・健康被害拡大・避難所過密・夜間対応・資機材不足	床下浸水と下水逆流・悪臭が継続。夜間に入り照明・発電機のバッテリー切れが発生し、手持ち資機材による応急照明で夜間巡回・健康観察・見守りを継続。住民の転倒や体調急変リスクが高まっている。	照明・発電機等の資機材管理・追加手配、手持ちライトや誘導灯の応急活用、夜間巡回・健康観察体制の強化、住民への安全指導・夜間移動制限・体調急変時の連絡方法周知、情報共有体制の強化	平成25年台風18号時、同地域で夜間の照明・発電機不足、避難所・現場での安否確認遅延、体調急変時の発見遅れが報告されている。	['床下浸水継続による家財・ガス設備・給湯器被害', '下水逆流による衛生被害・健康被害（体調不良者発生）', '生活物資不足・医療資源逼迫による住民の体調不良・不安拡大', '夜間・停電下での事故・体調急変の発見遅延', '避難所過密・受け入れ遅延', '追加搬送希望者の増加による対応遅延', '照明・発電機バッテリー切れによる夜間対応困難']	['冠水長期化による孤立世帯の発生', '感染症・生活環境悪化による体調不良者増加', '支援班・救助班・医療班・救急隊の現場到着遅延', '臨時避難所運用・物資配布の遅延・混乱', '夜間対応困難による住民不安の拡大']
		1-27	450	発災127分後	照明・発電機のバッテリー切れが続く中、避難所・サテライト避難所では引き続き手持ちライトや誘導灯のみで夜間巡回・健康観察・住民見守りを継続。住民の転倒や体調急変リスクがさらに高まり、現場では夜間移動制限と応急手当マニュアルの再徹底、安全指導の強化が続行されている。	現場班（避難誘導・保健師）	『照明・発電機のバッテリー切れが続いており、現場では手持ちライトや誘導灯のみで夜間巡回・健康観察・住民見守りを継続中。住民の一部からは暗闇や寒さへの不安、転倒や体調急変のリスクについての相談が増えている。夜間移動制限や転倒防止策の再周知、応急手当マニュアルの再確認を現場で実施中。追加資機材は依然到着していない』との現場班からの報告。	夜間の冷え込みが続き、健康相談や応急手当のニーズが高い。転倒事故や体調急変時の連絡方法は現場で再周知済み。住民への声かけや見守り体制を強化しているが、追加照明・発電機は本部で手配中も道路冠水で搬入が遅延中。	淀川から約450mの低地で住宅密集地。南側が窪地となっており、水が集まりやすい。都市型排水能力を超えた状態が長期化しやすく、高齢者世帯も多い。夜間は特に安全管理が課題。	資機材不足・夜間下での現場主導による応急対応力、住民安全確保、情報共有・現場判断力の強化訓練。現場リーダーの判断・連携力、住民の安全対策徹底、住民不安への対応力向上を狙う。	資機材不足時の応急照明・誘導灯活用、夜間巡回・健康観察・住民安全指導、現場と本部・関係機関の情報共有・追加要請、住民不安・転倒リスク管理、応急手当マニュアルの再徹底。	現場班による手持ち照明・誘導灯の最大活用、住民の夜間移動制限や転倒防止策の徹底、健康観察・応急手当の継続、本部への追加資機材要請・状況報告、住民への安全指導・不安解消の声かけ、応急手当マニュアルの再確認・周知。	資機材不足による応急対応力の低下、暗闇下での転倒事故や健康観察の遅延、住民の不安・混乱拡大、追加資機材搬入の遅延、現場と本部間の情報伝達遅延、体調急変や事故への即応困難	道路は膝程度の冠水が継続、床下10〜15cmの浸水、下水逆流・悪臭も継続中	床下浸水長期化・下水逆流・健康被害拡大・避難所過密・夜間対応・資機材不足	床下浸水と下水逆流・悪臭が継続。夜間に入り照明・発電機のバッテリー切れが発生し、手持ち資機材による応急照明で夜間巡回・健康観察・見守りを継続。住民の転倒や体調急変リスクが高まっている。住民の不安も増大し、現場対応力の維持が課題となっている。	照明・発電機等の資機材管理・追加手配、手持ちライトや誘導灯の応急活用、夜間巡回・健康観察体制の強化、住民への安全指導・夜間移動制限・体調急変時の連絡方法周知、情報共有体制の強化、応急手当マニュアルの再確認・周知	平成25年台風18号時、同地域で夜間の照明・発電機不足、避難所・現場での安否確認遅延、体調急変時の発見遅れが報告されている。	['床下浸水継続による家財・ガス設備・給湯器被害', '下水逆流による衛生被害・健康被害（体調不良者発生）', '生活物資不足・医療資源逼迫による住民の体調不良・不安拡大', '夜間・停電下での事故・体調急変の発見遅延', '避難所過密・受け入れ遅延', '追加搬送希望者の増加による対応遅延', '照明・発電機バッテリー切れによる夜間対応困難']	['冠水長期化による孤立世帯の発生', '感染症・生活環境悪化による体調不良者増加', '支援班・救助班・医療班・救急隊の現場到着遅延', '臨時避難所運用・物資配布の遅延・混乱', '夜間対応困難による住民不安の拡大']
		1-28	450	発災134分後	照明・発電機のバッテリー切れが続く中、避難所・サテライト避難所では引き続き手持ちライトや誘導灯のみで夜間巡回・健康観察・住民見守りを継続。住民の転倒や体調急変リスクがさらに高まっているため、現場では夜間移動制限と応急手当マニュアルの再徹底、安全指導の強化が続行されている。	現場班（避難誘導・保健師）	『照明・発電機のバッテリー切れが続いており、現場では手持ちライトや誘導灯のみで夜間巡回・健康観察・住民見守りを継続中。住民の一部からは暗闇や寒さへの不安、転倒や体調急変のリスクについての相談が増えている。夜間移動制限や転倒防止策の再周知、応急手当マニュアルの再確認を現場で実施中。追加資機材は依然到着していない』との現場班からの報告。	夜間の冷え込みが続き、健康相談や応急手当のニーズが高い。転倒事故や体調急変時の連絡方法は現場で再周知済み。住民への声かけや見守り体制を強化しているが、追加照明・発電機は本部で手配中も道路冠水で搬入が遅延中。	淀川から約450mの低地で住宅密集地。南側が窪地となっており、水が集まりやすい。都市型排水能力を超えた状態が長期化しやすく、高齢者世帯も多い。夜間は特に安全管理が課題。	資機材不足・夜間下での現場主導による応急対応力、住民安全確保、情報共有・現場判断力の強化訓練。現場リーダーの判断・連携力、住民の安全対策徹底、住民不安への対応力向上を狙う。	資機材不足時の応急照明・誘導灯活用、夜間巡回・健康観察・住民安全指導、現場と本部・関係機関の情報共有・追加要請、住民不安・転倒リスク管理、応急手当マニュアルの再徹底。	現場班による手持ち照明・誘導灯の最大活用、住民の夜間移動制限や転倒防止策の徹底、健康観察・応急手当の継続、本部への追加資機材要請・状況報告、住民への安全指導・不安解消の声かけ、応急手当マニュアルの再確認・周知。	資機材不足による応急対応力の低下、暗闇下での転倒事故や健康観察の遅延、住民の不安・混乱拡大、追加資機材搬入の遅延、現場と本部間の情報伝達遅延、体調急変や事故への即応困難	道路は膝程度の冠水が継続、床下10〜15cmの浸水、下水逆流・悪臭も継続中	床下浸水長期化・下水逆流・健康被害拡大・避難所過密・夜間対応・資機材不足	床下浸水と下水逆流・悪臭が継続。夜間に入り照明・発電機のバッテリー切れが発生し、手持ち資機材による応急照明で夜間巡回・健康観察・見守りを継続。住民の転倒や体調急変リスクが高まっている。住民の不安も増大し、現場対応力の維持が課題となっている。	照明・発電機等の資機材管理・追加手配、手持ちライトや誘導灯の応急活用、夜間巡回・健康観察体制の強化、住民への安全指導・夜間移動制限・体調急変時の連絡方法周知、情報共有体制の強化、応急手当マニュアルの再確認・周知	平成25年台風18号時、同地域で夜間の照明・発電機不足、避難所・現場での安否確認遅延、体調急変時の発見遅れが報告されている。	['床下浸水継続による家財・ガス設備・給湯器被害', '下水逆流による衛生被害・健康被害（体調不良者発生）', '生活物資不足・医療資源逼迫による住民の体調不良・不安拡大', '夜間・停電下での事故・体調急変の発見遅延', '避難所過密・受け入れ遅延', '追加搬送希望者の増加による対応遅延', '照明・発電機バッテリー切れによる夜間対応困難']	['冠水長期化による孤立世帯の発生', '感染症・生活環境悪化による体調不良者増加', '支援班・救助班・医療班・救急隊の現場到着遅延', '臨時避難所運用・物資配布の遅延・混乱', '夜間対応困難による住民不安の拡大']
		1-29	450	発災139分後	照明・発電機のバッテリー切れが続き、手持ちライトや誘導灯のみで夜間巡回・健康観察・住民見守りを継続。住民の転倒や体調急変リスクが一段と高まり、現場では夜間移動制限と応急手当マニュアルの再徹底、安全指導の強化が続行されている。	現場班（避難誘導・保健師）	『照明・発電機のバッテリー切れが続いており、現場では手持ちライトや誘導灯のみで夜間巡回・健康観察・住民見守りを継続中。住民の一部からは暗闇や寒さへの不安、転倒や体調急変のリスクについての相談が増えている。夜間移動制限や転倒防止策の再周知、応急手当マニュアルの再確認を現場で実施中。追加資機材は依然到着していない』との現場班からの報告。	夜間の冷え込みが続き、健康相談や応急手当のニーズが高い。転倒事故や体調急変時の連絡方法は現場で再周知済み。住民への声かけや見守り体制を強化しているが、追加照明・発電機は本部で手配中も道路冠水で搬入が遅延中。	淀川から約450mの低地で住宅密集地。南側が窪地となっており、水が集まりやすい。都市型排水能力を超えた状態が長期化しやすく、高齢者世帯も多い。夜間は特に安全管理が課題。	資機材不足・夜間下での現場主導による応急対応力、住民安全確保、情報共有・現場判断力の強化訓練。現場リーダーの判断・連携力、住民の安全対策徹底、住民不安への対応力向上を狙う。	資機材不足時の応急照明・誘導灯活用、夜間巡回・健康観察・住民安全指導、現場と本部・関係機関の情報共有・追加要請、住民不安・転倒リスク管理、応急手当マニュアルの再徹底。	現場班による手持ち照明・誘導灯の最大活用、住民の夜間移動制限や転倒防止策の徹底、健康観察・応急手当の継続、本部への追加資機材要請・状況報告、住民への安全指導・不安解消の声かけ、応急手当マニュアルの再確認・周知。	資機材不足による応急対応力の低下、暗闇下での転倒事故や健康観察の遅延、住民の不安・混乱拡大、追加資機材搬入の遅延、現場と本部間の情報伝達遅延、体調急変や事故への即応困難	道路は膝程度の冠水が継続、床下10〜15cmの浸水、下水逆流・悪臭も継続中	床下浸水長期化・下水逆流・健康被害拡大・避難所過密・夜間対応・資機材不足	床下浸水と下水逆流・悪臭が継続。夜間に入り照明・発電機のバッテリー切れが発生し、手持ち資機材による応急照明で夜間巡回・健康観察・見守りを継続。住民の転倒や体調急変リスクが高まっている。住民の不安も増大し、現場対応力の維持が課題となっている。	照明・発電機等の資機材管理・追加手配、手持ちライトや誘導灯の応急活用、夜間巡回・健康観察体制の強化、住民への安全指導・夜間移動制限・体調急変時の連絡方法周知、情報共有体制の強化、応急手当マニュアルの再確認・周知	平成25年台風18号時、同地域で夜間の照明・発電機不足、避難所・現場での安否確認遅延、体調急変時の発見遅れが報告されている。	['床下浸水継続による家財・ガス設備・給湯器被害', '下水逆流による衛生被害・健康被害（体調不良者発生）', '生活物資不足・医療資源逼迫による住民の体調不良・不安拡大', '夜間・停電下での事故・体調急変の発見遅延', '避難所過密・受け入れ遅延', '追加搬送希望者の増加による対応遅延', '照明・発電機バッテリー切れによる夜間対応困難']	['冠水長期化による孤立世帯の発生', '感染症・生活環境悪化による体調不良者増加', '支援班・救助班・医療班・救急隊の現場到着遅延', '臨時避難所運用・物資配布の遅延・混乱', '夜間対応困難による住民不安の拡大']
		1-30	450	発災142分後	照明・発電機のバッテリー切れが長期化し、避難所・サテライト避難所では引き続き手持ちライトや誘導灯のみで夜間巡回・健康観察・住民見守りを継続。住民の転倒や体調急変リスクが一段と高まり、現場では夜間移動制限と応急手当マニュアルの徹底、安全指導の強化が続行されている。	現場班（避難誘導・保健師）	『照明・発電機のバッテリー切れが継続し、現場では手持ちライトや誘導灯のみで夜間巡回・健康観察・住民見守りを継続中です。住民の一部からは暗闇や寒さへの不安、転倒や体調急変のリスクについての相談が増えています。夜間移動制限や転倒防止策、応急手当マニュアルの再確認を現場で実施中。追加資機材は依然として到着していません』との現場班からの報告。	夜間の冷え込みが続き、健康相談や応急手当のニーズが高い。転倒事故や体調急変時の連絡方法は現場で再周知済み。住民への声かけや見守り体制を強化しているが、追加照明・発電機は本部で手配中も道路冠水で搬入が遅延している。	淀川から約450mの低地で住宅密集地。南側が窪地となっており、水が集まりやすい。都市型排水能力を超えた状態が長期化しやすく、高齢者世帯も多い。夜間は特に安全管理が課題。	資機材不足・夜間下での現場主導による応急対応力・住民安全確保・情報共有・現場判断力の強化訓練。現場リーダーの判断・連携力、住民の安全対策徹底、住民不安への対応力向上を狙う。	資機材不足時の応急照明・誘導灯活用、夜間巡回・健康観察・住民安全指導、現場と本部・関係機関の情報共有・追加要請、住民不安・転倒リスク管理、応急手当マニュアルの再徹底。	現場班による手持ち照明・誘導灯の最大活用、住民の夜間移動制限や転倒防止策の徹底、健康観察・応急手当の継続、本部への追加資機材要請・状況報告、住民への安全指導・不安解消の声かけ、応急手当マニュアルの再確認・周知。	資機材不足による応急対応力の低下、暗闇下での転倒事故や健康観察の遅延、住民の不安・混乱拡大、追加資機材搬入の遅延、現場と本部間の情報伝達遅延、体調急変や事故への即応困難	道路は膝程度の冠水が継続、床下10〜15cmの浸水、下水逆流・悪臭も継続中	床下浸水長期化・下水逆流・健康被害拡大・避難所過密・夜間対応・資機材不足	床下浸水と下水逆流・悪臭が継続。夜間に入り照明・発電機のバッテリー切れが発生し、手持ち資機材による応急照明で夜間巡回・健康観察・見守りを継続。住民の転倒や体調急変リスクが高まっている。住民の不安も増大し、現場対応力の維持が課題となっている。	照明・発電機等の資機材管理・追加手配、手持ちライトや誘導灯の応急活用、夜間巡回・健康観察体制の強化、住民への安全指導・夜間移動制限・体調急変時の連絡方法周知、情報共有体制の強化、応急手当マニュアルの再確認・周知	平成25年台風18号時、同地域で夜間の照明・発電機不足、避難所・現場での安否確認遅延、体調急変時の発見遅れが報告されている。	['床下浸水継続による家財・ガス設備・給湯器被害', '下水逆流による衛生被害・健康被害（体調不良者発生）', '生活物資不足・医療資源逼迫による住民の体調不良・不安拡大', '夜間・停電下での事故・体調急変の発見遅延', '避難所過密・受け入れ遅延', '追加搬送希望者の増加による対応遅延', '照明・発電機バッテリー切れによる夜間対応困難']	['冠水長期化による孤立世帯の発生', '感染症・生活環境悪化による体調不良者増加', '支援班・救助班・医療班・救急隊の現場到着遅延', '臨時避難所運用・物資配布の遅延・混乱', '夜間対応困難による住民不安の拡大']
		1-31	450	発災147分後	照明・発電機のバッテリー切れが長期化し、引き続き手持ちライトや誘導灯のみで夜間巡回・健康観察・住民見守りを継続。住民の転倒や体調急変リスクが高まり、現場では夜間移動制限と応急手当マニュアルの徹底、安全指導の強化が続行されている。	現場班（避難誘導・保健師）	『照明・発電機のバッテリー切れが継続し、現場では手持ちライトや誘導灯のみで夜間巡回・健康観察・住民見守りを継続中です。住民の一部からは暗闇や寒さへの不安、転倒や体調急変のリスクについての相談が増えています。夜間移動制限や転倒防止策、応急手当マニュアルの再確認を現場で実施中。追加資機材は依然として到着していません』との現場班からの報告。	夜間の冷え込みが続き、健康相談や応急手当のニーズが高い。転倒事故や体調急変時の連絡方法は現場で再周知済み。住民への声かけや見守り体制を強化しているが、追加照明・発電機は本部で手配中も道路冠水で搬入が遅延している。	淀川から約450mの低地で住宅密集地。南側が窪地となっており、水が集まりやすい。都市型排水能力を超えた状態が長期化しやすく、高齢者世帯も多い。夜間は特に安全管理が課題。	資機材不足・夜間下での現場主導による応急対応力・住民安全確保・情報共有・現場判断力の強化訓練。現場リーダーの判断・連携力、住民の安全対策徹底、住民不安への対応力向上を狙う。	資機材不足時の応急照明・誘導灯活用、夜間巡回・健康観察・住民安全指導、現場と本部・関係機関の情報共有・追加要請、住民不安・転倒リスク管理、応急手当マニュアルの再徹底。	現場班による手持ち照明・誘導灯の最大活用、住民の夜間移動制限や転倒防止策の徹底、健康観察・応急手当の継続、本部への追加資機材要請・状況報告、住民への安全指導・不安解消の声かけ、応急手当マニュアルの再確認・周知。	資機材不足による応急対応力の低下、暗闇下での転倒事故や健康観察の遅延、住民の不安・混乱拡大、追加資機材搬入の遅延、現場と本部間の情報伝達遅延、体調急変や事故への即応困難	道路は膝程度の冠水が継続、床下10〜15cmの浸水、下水逆流・悪臭も継続中	床下浸水長期化・下水逆流・健康被害拡大・避難所過密・夜間対応・資機材不足	床下浸水と下水逆流・悪臭が継続。夜間に入り照明・発電機のバッテリー切れが発生し、手持ち資機材による応急照明で夜間巡回・健康観察・見守りを継続。住民の転倒や体調急変リスクが高まっている。住民の不安も増大し、現場対応力の維持が課題となっている。	照明・発電機等の資機材管理・追加手配、手持ちライトや誘導灯の応急活用、夜間巡回・健康観察体制の強化、住民への安全指導・夜間移動制限・体調急変時の連絡方法周知、情報共有体制の強化、応急手当マニュアルの再確認・周知	平成25年台風18号時、同地域で夜間の照明・発電機不足、避難所・現場での安否確認遅延、体調急変時の発見遅れが報告されている。	['床下浸水継続による家財・ガス設備・給湯器被害', '下水逆流による衛生被害・健康被害（体調不良者発生）', '生活物資不足・医療資源逼迫による住民の体調不良・不安拡大', '夜間・停電下での事故・体調急変の発見遅延', '避難所過密・受け入れ遅延', '追加搬送希望者の増加による対応遅延', '照明・発電機バッテリー切れによる夜間対応困難']	['冠水長期化による孤立世帯の発生', '感染症・生活環境悪化による体調不良者増加', '支援班・救助班・医療班・救急隊の現場到着遅延', '臨時避難所運用・物資配布の遅延・混乱', '夜間対応困難による住民不安の拡大']
		1-32	450	発災151分後	照明・発電機のバッテリー切れが継続し、手持ちライトや誘導灯のみで夜間巡回・健康観察・住民見守りを継続。住民の転倒や体調急変リスクがさらに高まり、現場では夜間移動制限・応急手当マニュアルの再徹底、安全指導の強化が続行されている。	現場班（避難誘導・保健師）	『照明・発電機のバッテリー切れが続いており、現場では手持ちライトや誘導灯のみで夜間巡回・健康観察・住民見守りを継続中です。住民の一部からは暗闇や寒さへの不安、転倒や体調急変のリスクについての相談が増えています。夜間移動制限や転倒防止策の再周知、応急手当マニュアルの再確認を現場で実施中。追加資機材は依然として到着していません』との現場班からの報告。	夜間の冷え込みが続き、健康相談や応急手当のニーズが高い。転倒事故や体調急変時の連絡方法は現場で再周知済み。住民への声かけや見守り体制を強化しているが、追加照明・発電機は本部で手配中も道路冠水で搬入が遅延している。	淀川から約450mの低地で住宅密集地。南側が窪地となっており、水が集まりやすい。都市型排水能力を超えた状態が長期化しやすく、高齢者世帯も多い。夜間は特に安全管理が課題。	資機材不足・夜間下での現場主導による応急対応力・住民安全確保・情報共有・現場判断力の強化訓練。現場リーダーの判断・連携力、住民の安全対策徹底、住民不安への対応力向上を狙う。	資機材不足時の応急照明・誘導灯活用、夜間巡回・健康観察・住民安全指導、現場と本部・関係機関の情報共有・追加要請、住民不安・転倒リスク管理、応急手当マニュアルの再徹底。	現場班による手持ち照明・誘導灯の最大活用、住民の夜間移動制限や転倒防止策の徹底、健康観察・応急手当の継続、本部への追加資機材要請・状況報告、住民への安全指導・不安解消の声かけ、応急手当マニュアルの再確認・周知。	資機材不足による応急対応力の低下、暗闇下での転倒事故や健康観察の遅延、住民の不安・混乱拡大、追加資機材搬入の遅延、現場と本部間の情報伝達遅延、体調急変や事故への即応困難	道路は膝程度の冠水が継続、床下10〜15cmの浸水、下水逆流・悪臭も継続中	床下浸水長期化・下水逆流・健康被害拡大・避難所過密・夜間対応・資機材不足	床下浸水と下水逆流・悪臭が継続。夜間に入り照明・発電機のバッテリー切れが発生し、手持ち資機材による応急照明で夜間巡回・健康観察・見守りを継続。住民の転倒や体調急変リスクが高まっている。住民の不安も増大し、現場対応力の維持が課題となっている。	照明・発電機等の資機材管理・追加手配、手持ちライトや誘導灯の応急活用、夜間巡回・健康観察体制の強化、住民への安全指導・夜間移動制限・体調急変時の連絡方法周知、情報共有体制の強化、応急手当マニュアルの再確認・周知	平成25年台風18号時、同地域で夜間の照明・発電機不足、避難所・現場での安否確認遅延、体調急変時の発見遅れが報告されている。	['床下浸水継続による家財・ガス設備・給湯器被害', '下水逆流による衛生被害・健康被害（体調不良者発生）', '生活物資不足・医療資源逼迫による住民の体調不良・不安拡大', '夜間・停電下での事故・体調急変の発見遅延', '避難所過密・受け入れ遅延', '追加搬送希望者の増加による対応遅延', '照明・発電機バッテリー切れによる夜間対応困難']	['冠水長期化による孤立世帯の発生', '感染症・生活環境悪化による体調不良者増加', '支援班・救助班・医療班・救急隊の現場到着遅延', '臨時避難所運用・物資配布の遅延・混乱', '夜間対応困難による住民不安の拡大']
		1-33	450	発災158分後	照明・発電機のバッテリー切れが続き、手持ちライトや誘導灯のみで夜間巡回・健康観察・住民見守りを続行。住民の転倒や体調急変リスクが非常に高まっており、現場では夜間移動制限・応急手当マニュアルの再徹底、安全指導の強化が続いている。	現場班（避難誘導・保健師）	『照明・発電機のバッテリー切れが継続し、現場では手持ちライトや誘導灯のみで夜間巡回・健康観察・住民見守りを続けています。住民の一部からは暗闇・寒さへの不安、転倒や体調急変のリスク相談が続出。夜間移動制限や転倒防止策、応急手当マニュアルの再確認・再周知を現場で強化中。追加資機材は依然未到着です』との現場班からの報告。	夜間の冷え込みが続き、健康相談や応急手当ニーズが高い。転倒事故や体調急変時の連絡方法は現場で再周知済み。住民への声かけ・見守り体制を強化しているが、追加照明・発電機は本部で手配中も道路冠水で搬入が遅延している。	淀川から約450mの低地で住宅密集地。南側が窪地となっており、水が集まりやすい。都市型排水能力を超えた状態が長期化しやすく、高齢者世帯も多い。夜間は特に安全管理が課題。	資機材不足・夜間下での現場主導による応急対応力・住民安全確保・情報共有・現場判断力の強化訓練。現場リーダーの判断・連携力、住民の安全対策徹底、住民不安への対応力向上を狙う。	資機材不足時の応急照明・誘導灯活用、夜間巡回・健康観察・住民安全指導、現場と本部・関係機関の情報共有・追加要請、住民不安・転倒リスク管理、応急手当マニュアルの再徹底。	現場班による手持ち照明・誘導灯の最大活用、住民の夜間移動制限や転倒防止策の徹底、健康観察・応急手当の継続、本部への追加資機材要請・状況報告、住民への安全指導・不安解消の声かけ、応急手当マニュアルの再確認・周知。	資機材不足による応急対応力の低下、暗闇下での転倒事故や健康観察の遅延、住民の不安・混乱拡大、追加資機材搬入の遅延、現場と本部間の情報伝達遅延、体調急変や事故への即応困難	道路は膝程度の冠水が継続、床下10〜15cmの浸水、下水逆流・悪臭も継続中	床下浸水長期化・下水逆流・健康被害拡大・避難所過密・夜間対応・資機材不足	床下浸水と下水逆流・悪臭が継続。夜間に入り照明・発電機のバッテリー切れが発生し、手持ち資機材による応急照明で夜間巡回・健康観察・見守りを継続。住民の転倒や体調急変リスクが高まっている。住民の不安も増大し、現場対応力の維持が課題となっている。	照明・発電機等の資機材管理・追加手配、手持ちライトや誘導灯の応急活用、夜間巡回・健康観察体制の強化、住民への安全指導・夜間移動制限・体調急変時の連絡方法周知、情報共有体制の強化、応急手当マニュアルの再確認・周知	平成25年台風18号時、同地域で夜間の照明・発電機不足、避難所・現場での安否確認遅延、体調急変時の発見遅れが報告されている。	['床下浸水継続による家財・ガス設備・給湯器被害', '下水逆流による衛生被害・健康被害（体調不良者発生）', '生活物資不足・医療資源逼迫による住民の体調不良・不安拡大', '夜間・停電下での事故・体調急変の発見遅延', '避難所過密・受け入れ遅延', '追加搬送希望者の増加による対応遅延', '照明・発電機バッテリー切れによる夜間対応困難']	['冠水長期化による孤立世帯の発生', '感染症・生活環境悪化による体調不良者増加', '支援班・救助班・医療班・救急隊の現場到着遅延', '臨時避難所運用・物資配布の遅延・混乱', '夜間対応困難による住民不安の拡大']
		1-34	450	発災165分後	照明・発電機のバッテリー切れが続き、避難所・サテライト避難所では手持ちライトや誘導灯のみで夜間巡回・健康観察・住民見守りを継続。住民の転倒や体調急変リスクが非常に高い状態が続いており、現場では夜間移動制限・応急手当マニュアルの再徹底、安全指導の強化が継続中。	現場班（避難誘導・保健師）	『照明・発電機のバッテリー切れが続いており、現場では手持ちライトや誘導灯のみで夜間巡回・健康観察・住民見守りを続けています。住民の一部からは暗闇・寒さへの不安、転倒や体調急変のリスク相談が続出。夜間移動制限や転倒防止策、応急手当マニュアルの再確認・再周知を現場で強化中。追加資機材は依然未到着です』との現場班からの報告。	夜間の冷え込みが続き、健康相談や応急手当ニーズが高い。転倒事故や体調急変時の連絡方法は現場で再周知済み。住民への声かけ・見守り体制を強化しているが、追加照明・発電機は本部で手配中も道路冠水で搬入が遅延している。	淀川から約450mの低地で住宅密集地。南側が窪地となっており、水が集まりやすい。都市型排水能力を超えた状態が長期化しやすく、高齢者世帯も多い。夜間は特に安全管理が課題。	資機材不足・夜間下での現場主導による応急対応力・住民安全確保・情報共有・現場判断力の強化訓練。現場リーダーの判断・連携力、住民の安全対策徹底、住民不安への対応力向上を狙う。	資機材不足時の応急照明・誘導灯活用、夜間巡回・健康観察・住民安全指導、現場と本部・関係機関の情報共有・追加要請、住民不安・転倒リスク管理、応急手当マニュアルの再徹底。	現場班による手持ち照明・誘導灯の最大活用、住民の夜間移動制限や転倒防止策の徹底、健康観察・応急手当の継続、本部への追加資機材要請・状況報告、住民への安全指導・不安解消の声かけ、応急手当マニュアルの再確認・周知。	資機材不足による応急対応力の低下、暗闇下での転倒事故や健康観察の遅延、住民の不安・混乱拡大、追加資機材搬入の遅延、現場と本部間の情報伝達遅延、体調急変や事故への即応困難	道路は膝程度の冠水が継続、床下10〜15cmの浸水、下水逆流・悪臭も継続中	床下浸水長期化・下水逆流・健康被害拡大・避難所過密・夜間対応・資機材不足	床下浸水と下水逆流・悪臭が継続。夜間に入り照明・発電機のバッテリー切れが発生し、手持ち資機材による応急照明で夜間巡回・健康観察・見守りを継続。住民の転倒や体調急変リスクが高まっている。住民の不安も増大し、現場対応力の維持が課題となっている。	照明・発電機等の資機材管理・追加手配、手持ちライトや誘導灯の応急活用、夜間巡回・健康観察体制の強化、住民への安全指導・夜間移動制限・体調急変時の連絡方法周知、情報共有体制の強化、応急手当マニュアルの再確認・周知	平成25年台風18号時、同地域で夜間の照明・発電機不足、避難所・現場での安否確認遅延、体調急変時の発見遅れが報告されている。	['床下浸水継続による家財・ガス設備・給湯器被害', '下水逆流による衛生被害・健康被害（体調不良者発生）', '生活物資不足・医療資源逼迫による住民の体調不良・不安拡大', '夜間・停電下での事故・体調急変の発見遅延', '避難所過密・受け入れ遅延', '追加搬送希望者の増加による対応遅延', '照明・発電機バッテリー切れによる夜間対応困難']	['冠水長期化による孤立世帯の発生', '感染症・生活環境悪化による体調不良者増加', '支援班・救助班・医療班・救急隊の現場到着遅延', '臨時避難所運用・物資配布の遅延・混乱', '夜間対応困難による住民不安の拡大']
		1-35	450	発災168分後	照明・発電機のバッテリー切れが続き、避難所・サテライト避難所では引き続き手持ちライトや誘導灯のみで夜間巡回・健康観察・住民見守りを継続。住民の転倒や体調急変リスクが非常に高い状態が続いており、現場では夜間移動制限・応急手当マニュアルの再徹底、安全指導の強化が続行されている。	現場班（避難誘導・保健師）	『照明・発電機のバッテリー切れが継続し、現場では手持ちライトや誘導灯のみで夜間巡回・健康観察・住民見守りを続けています。住民からは暗闇・寒さへの不安、転倒や体調急変リスクの相談が続出。夜間移動制限や転倒防止策、応急手当マニュアルの再確認・再周知を現場で強化中。追加資機材は依然未到着です』との現場班からの報告。	夜間の冷え込みが続き、健康相談や応急手当ニーズが高い。転倒事故や体調急変時の連絡方法は現場で再周知済み。住民への声かけ・見守り体制を強化しているが、追加照明・発電機は本部で手配中も道路冠水で搬入が遅延している。	淀川から約450mの低地で住宅密集地。南側が窪地となっており、水が集まりやすい。都市型排水能力を超えた状態が長期化しやすく、高齢者世帯も多い。夜間は特に安全管理が課題。	資機材不足・夜間下での現場主導による応急対応力・住民安全確保・情報共有・現場判断力の強化訓練。現場リーダーの判断・連携力、住民の安全対策徹底、住民不安への対応力向上を狙う。	資機材不足時の応急照明・誘導灯活用、夜間巡回・健康観察・住民安全指導、現場と本部・関係機関の情報共有・追加要請、住民不安・転倒リスク管理、応急手当マニュアルの再徹底。	現場班による手持ち照明・誘導灯の最大活用、住民の夜間移動制限や転倒防止策の徹底、健康観察・応急手当の継続、本部への追加資機材要請・状況報告、住民への安全指導・不安解消の声かけ、応急手当マニュアルの再確認・周知。	資機材不足による応急対応力の低下、暗闇下での転倒事故や健康観察の遅延、住民の不安・混乱拡大、追加資機材搬入の遅延、現場と本部間の情報伝達遅延、体調急変や事故への即応困難	道路は膝程度の冠水が継続、床下10〜15cmの浸水、下水逆流・悪臭も継続中	床下浸水長期化・下水逆流・健康被害拡大・避難所過密・夜間対応・資機材不足	床下浸水と下水逆流・悪臭が継続。夜間に入り照明・発電機のバッテリー切れが発生し、手持ち資機材による応急照明で夜間巡回・健康観察・見守りを継続。住民の転倒や体調急変リスクが高まっている。住民の不安も増大し、現場対応力の維持が課題となっている。	照明・発電機等の資機材管理・追加手配、手持ちライトや誘導灯の応急活用、夜間巡回・健康観察体制の強化、住民への安全指導・夜間移動制限・体調急変時の連絡方法周知、情報共有体制の強化、応急手当マニュアルの再確認・周知	平成25年台風18号時、同地域で夜間の照明・発電機不足、避難所・現場での安否確認遅延、体調急変時の発見遅れが報告されている。	['床下浸水継続による家財・ガス設備・給湯器被害', '下水逆流による衛生被害・健康被害（体調不良者発生）', '生活物資不足・医療資源逼迫による住民の体調不良・不安拡大', '夜間・停電下での事故・体調急変の発見遅延', '避難所過密・受け入れ遅延', '追加搬送希望者の増加による対応遅延', '照明・発電機バッテリー切れによる夜間対応困難']	['冠水長期化による孤立世帯の発生', '感染症・生活環境悪化による体調不良者増加', '支援班・救助班・医療班・救急隊の現場到着遅延', '臨時避難所運用・物資配布の遅延・混乱', '夜間対応困難による住民不安の拡大']
		1-36	450	発災171分後	照明・発電機のバッテリー切れが続き、避難所・サテライト避難所では引き続き手持ちライトや誘導灯のみで夜間巡回・健康観察・住民見守りを継続。住民の転倒や体調急変リスクが非常に高い状態が続いており、現場では夜間移動制限・応急手当マニュアルの再徹底、安全指導の強化が継続中。	現場班（避難誘導・保健師）	『照明・発電機のバッテリー切れが続いており、現場では手持ちライトや誘導灯のみで夜間巡回・健康観察・住民見守りを続けています。住民からは暗闇・寒さへの不安、転倒や体調急変リスクの相談が続出。夜間移動制限や転倒防止策、応急手当マニュアルの再確認・再周知を現場で強化中。追加資機材は依然未到着です』との現場班からの報告。	夜間の冷え込みが続き、健康相談や応急手当ニーズが高い。転倒事故や体調急変時の連絡方法は現場で再周知済み。住民への声かけ・見守り体制を強化しているが、追加照明・発電機は本部で手配中も道路冠水で搬入が遅延している。	淀川から約450mの低地で住宅密集地。南側が窪地となっており、水が集まりやすい。都市型排水能力を超えた状態が長期化しやすく、高齢者世帯も多い。夜間は特に安全管理が課題。	資機材不足・夜間下での現場主導による応急対応力・住民安全確保・情報共有・現場判断力の強化訓練。現場リーダーの判断・連携力、住民の安全対策徹底、住民不安への対応力向上を狙う。	資機材不足時の応急照明・誘導灯活用、夜間巡回・健康観察・住民安全指導、現場と本部・関係機関の情報共有・追加要請、住民不安・転倒リスク管理、応急手当マニュアルの再徹底。	現場班による手持ち照明・誘導灯の最大活用、住民の夜間移動制限や転倒防止策の徹底、健康観察・応急手当の継続、本部への追加資機材要請・状況報告、住民への安全指導・不安解消の声かけ、応急手当マニュアルの再確認・周知。	資機材不足による応急対応力の低下、暗闇下での転倒事故や健康観察の遅延、住民の不安・混乱拡大、追加資機材搬入の遅延、現場と本部間の情報伝達遅延、体調急変や事故への即応困難	道路は膝程度の冠水が継続、床下10〜15cmの浸水、下水逆流・悪臭も継続中	床下浸水長期化・下水逆流・健康被害拡大・避難所過密・夜間対応・資機材不足	床下浸水と下水逆流・悪臭が継続。夜間に入り照明・発電機のバッテリー切れが発生し、手持ち資機材による応急照明で夜間巡回・健康観察・見守りを継続。住民の転倒や体調急変リスクが高まっている。住民の不安も増大し、現場対応力の維持が課題となっている。	照明・発電機等の資機材管理・追加手配、手持ちライトや誘導灯の応急活用、夜間巡回・健康観察体制の強化、住民への安全指導・夜間移動制限・体調急変時の連絡方法周知、情報共有体制の強化、応急手当マニュアルの再確認・周知	平成25年台風18号時、同地域で夜間の照明・発電機不足、避難所・現場での安否確認遅延、体調急変時の発見遅れが報告されている。	['床下浸水継続による家財・ガス設備・給湯器被害', '下水逆流による衛生被害・健康被害（体調不良者発生）', '生活物資不足・医療資源逼迫による住民の体調不良・不安拡大', '夜間・停電下での事故・体調急変の発見遅延', '避難所過密・受け入れ遅延', '追加搬送希望者の増加による対応遅延', '照明・発電機バッテリー切れによる夜間対応困難']	['冠水長期化による孤立世帯の発生', '感染症・生活環境悪化による体調不良者増加', '支援班・救助班・医療班・救急隊の現場到着遅延', '臨時避難所運用・物資配布の遅延・混乱', '夜間対応困難による住民不安の拡大']
		1-37	450	発災178分後	照明・発電機のバッテリー切れが長期化し、手持ちライトや誘導灯のみで夜間巡回・健康観察・住民見守りを継続。住民の転倒や体調急変リスクが非常に高い状態が続いており、現場では夜間移動制限・応急手当マニュアルの再徹底、安全指導の強化が続行されている。	現場班（避難誘導・保健師）	『照明・発電機のバッテリー切れが続いており、現場では手持ちライトや誘導灯のみで夜間巡回・健康観察・住民見守りを続けています。住民からは暗闇・寒さへの不安、転倒や体調急変リスクの相談が続出。夜間移動制限や転倒防止策、応急手当マニュアルの再確認・再周知を現場で強化中。追加資機材は依然未到着です』との現場班からの報告。	夜間の冷え込みが続き、健康相談や応急手当ニーズが高い。転倒事故や体調急変時の連絡方法は現場で再周知済み。住民への声かけ・見守り体制を強化しているが、追加照明・発電機は本部で手配中も道路冠水で搬入が遅延している。	淀川から約450mの低地で住宅密集地。南側が窪地となっており、水が集まりやすい。都市型排水能力を超えた状態が長期化しやすく、高齢者世帯も多い。夜間は特に安全管理が課題。	資機材不足・夜間下での現場主導による応急対応力・住民安全確保・情報共有・現場判断力の強化訓練。現場リーダーの判断・連携力、住民の安全対策徹底、住民不安への対応力向上を狙う。	資機材不足時の応急照明・誘導灯活用、夜間巡回・健康観察・住民安全指導、現場と本部・関係機関の情報共有・追加要請、住民不安・転倒リスク管理、応急手当マニュアルの再徹底。	現場班による手持ち照明・誘導灯の最大活用、住民の夜間移動制限や転倒防止策の徹底、健康観察・応急手当の継続、本部への追加資機材要請・状況報告、住民への安全指導・不安解消の声かけ、応急手当マニュアルの再確認・周知。	資機材不足による応急対応力の低下、暗闇下での転倒事故や健康観察の遅延、住民の不安・混乱拡大、追加資機材搬入の遅延、現場と本部間の情報伝達遅延、体調急変や事故への即応困難	道路は膝程度の冠水が継続、床下10〜15cmの浸水、下水逆流・悪臭も継続中	床下浸水長期化・下水逆流・健康被害拡大・避難所過密・夜間対応・資機材不足	床下浸水と下水逆流・悪臭が継続。夜間に入り照明・発電機のバッテリー切れが発生し、手持ち資機材による応急照明で夜間巡回・健康観察・見守りを継続。住民の転倒や体調急変リスクが高まっている。住民の不安も増大し、現場対応力の維持が課題となっている。	照明・発電機等の資機材管理・追加手配、手持ちライトや誘導灯の応急活用、夜間巡回・健康観察体制の強化、住民への安全指導・夜間移動制限・体調急変時の連絡方法周知、情報共有体制の強化、応急手当マニュアルの再確認・周知	平成25年台風18号時、同地域で夜間の照明・発電機不足、避難所・現場での安否確認遅延、体調急変時の発見遅れが報告されている。	['床下浸水継続による家財・ガス設備・給湯器被害', '下水逆流による衛生被害・健康被害（体調不良者発生）', '生活物資不足・医療資源逼迫による住民の体調不良・不安拡大', '夜間・停電下での事故・体調急変の発見遅延', '避難所過密・受け入れ遅延', '追加搬送希望者の増加による対応遅延', '照明・発電機バッテリー切れによる夜間対応困難']	['冠水長期化による孤立世帯の発生', '感染症・生活環境悪化による体調不良者増加', '支援班・救助班・医療班・救急隊の現場到着遅延', '臨時避難所運用・物資配布の遅延・混乱', '夜間対応困難による住民不安の拡大']
		1-38	450	発災184分後	照明・発電機のバッテリー切れが長期化し、手持ちライトや誘導灯のみで夜間巡回・健康観察・住民見守りを継続。住民の転倒や体調急変リスクが非常に高い状態が続き、現場では夜間移動制限・応急手当マニュアルの再徹底、安全指導の強化が続行されている。	現場班（避難誘導・保健師）	『照明・発電機のバッテリー切れが継続し、現場では手持ちライトや誘導灯のみで夜間巡回・健康観察・住民見守りを続けています。住民からは暗闇・寒さへの不安、転倒や体調急変リスクの相談が続出。夜間移動制限や転倒防止策、応急手当マニュアルの再確認・再周知を現場で強化中。追加資機材は依然未到着です』との現場班からの報告。	夜間の冷え込みが続き、健康相談や応急手当ニーズが高い。転倒事故や体調急変時の連絡方法は現場で再周知済み。住民への声かけ・見守り体制を強化しているが、追加照明・発電機は本部で手配中も道路冠水で搬入が遅延している。	淀川から約450mの低地で住宅密集地。南側が窪地となっており、水が集まりやすい。都市型排水能力を超えた状態が長期化しやすく、高齢者世帯も多い。夜間は特に安全管理が課題。	資機材不足・夜間下での現場主導による応急対応力・住民安全確保・情報共有・現場判断力の強化訓練。現場リーダーの判断・連携力、住民の安全対策徹底、住民不安への対応力向上を狙う。	資機材不足時の応急照明・誘導灯活用、夜間巡回・健康観察・住民安全指導、現場と本部・関係機関の情報共有・追加要請、住民不安・転倒リスク管理、応急手当マニュアルの再徹底。	現場班による手持ち照明・誘導灯の最大活用、住民の夜間移動制限や転倒防止策の徹底、健康観察・応急手当の継続、本部への追加資機材要請・状況報告、住民への安全指導・不安解消の声かけ、応急手当マニュアルの再確認・周知。	資機材不足による応急対応力の低下、暗闇下での転倒事故や健康観察の遅延、住民の不安・混乱拡大、追加資機材搬入の遅延、現場と本部間の情報伝達遅延、体調急変や事故への即応困難	道路は膝程度の冠水が継続、床下10〜15cmの浸水、下水逆流・悪臭も継続中	床下浸水長期化・下水逆流・健康被害拡大・避難所過密・夜間対応・資機材不足	床下浸水と下水逆流・悪臭が継続。夜間に入り照明・発電機のバッテリー切れが発生し、手持ち資機材による応急照明で夜間巡回・健康観察・見守りを継続。住民の転倒や体調急変リスクが高まっている。住民の不安も増大し、現場対応力の維持が課題となっている。	照明・発電機等の資機材管理・追加手配、手持ちライトや誘導灯の応急活用、夜間巡回・健康観察体制の強化、住民への安全指導・夜間移動制限・体調急変時の連絡方法周知、情報共有体制の強化、応急手当マニュアルの再確認・周知	平成25年台風18号時、同地域で夜間の照明・発電機不足、避難所・現場での安否確認遅延、体調急変時の発見遅れが報告されている。	['床下浸水継続による家財・ガス設備・給湯器被害', '下水逆流による衛生被害・健康被害（体調不良者発生）', '生活物資不足・医療資源逼迫による住民の体調不良・不安拡大', '夜間・停電下での事故・体調急変の発見遅延', '避難所過密・受け入れ遅延', '追加搬送希望者の増加による対応遅延', '照明・発電機バッテリー切れによる夜間対応困難']	['冠水長期化による孤立世帯の発生', '感染症・生活環境悪化による体調不良者増加', '支援班・救助班・医療班・救急隊の現場到着遅延', '臨時避難所運用・物資配布の遅延・混乱', '夜間対応困難による住民不安の拡大']

## Sheet: 枚方市楠葉朝日二丁目6
評価	備考	シナリオID	(推測)災害の中心からの距離[m]	イベント発生時刻	付与内容	情報源	状況付与内容	補足情報	地形情報や想定想定される被害の特徴	訓練効果・狙い	判断ポイント	期待される対応行動	想定される課題	水位状況	被害の種類	詳細な被害状況	想定される対策	類似の過去事例(あれば記載)	直近のリスク	二次的なリスク
		1-2	500	発災5分後	住宅街内の一部道路で浅い冠水が発生し、側溝から水があふれ始めている	住民	自宅前の道路が水たまりになってきており、側溝から水があふれ出している。車の通行はできるが、歩道にも水が広がっている。周辺住民が様子を見に出てきているが、まだ避難は始まっていない。	消防や警察への連絡はまだ行っていない。冠水箇所は朝日二丁目6番地付近で、南側の道路とのこと。	淀川から約500mの低地で、住宅密集地。南側はやや窪地となっているため、周辺より冠水しやすい。下水処理能力が限界を超えると道路冠水が拡大しやすい。	初期段階での住民からの被害情報収集と、冠水拡大時の注意喚起・避難準備の体制確認を訓練する。	住民からの初期通報の受理、現地状況確認、冠水拡大時の避難判断基準の共有、関係機関への情報伝達。	通報内容の詳細聴取、現場確認班の派遣、住民への注意喚起、避難準備情報の伝達、消防・警察への情報共有、側溝や排水口の点検。	冠水範囲の正確な把握の遅れ、住民の避難判断の遅延、側溝からの溢水による転倒事故や車両の立ち往生、情報伝達の混乱	道路で足首程度の冠水、側溝からの溢水あり	軽度冠水・交通障害	道路の一部が冠水し始め、側溝から水があふれている。住宅への直接浸水は現時点で確認されていないが、今後の増水で拡大の恐れ。車両通行が難しくなりつつある。	住民への早期注意喚起、現場巡回と冠水範囲の確認、側溝・排水口の点検、関係機関との情報共有、避難準備情報の伝達	平成25年台風18号時、同地域で道路冠水と一部住宅床下浸水の報告あり	['道路冠水による通行障害', '側溝溢水による転倒や車両事故']	['冠水拡大による住宅浸水', '下水逆流による衛生被害']
		1-3	500	発災10分後	道路冠水が徐々に拡大し、一部の住宅敷地内に水が入り始めたとの現場報告が入る	消防	消防隊が現地巡回を行ったところ、朝日二丁目6番地付近の南側道路で冠水が膝下程度まで拡大。低地側の住宅敷地内にも水が入り始めており、住民が土のうを積むなど対応している。住宅内への本格的な浸水は現時点で確認されていないが、今後の増水に警戒が必要との報告。	現場は住宅密集地で、道路沿いの排水口の一部が既に詰まり始めている。消防は住民への避難準備の呼びかけと排水口の点検を実施中。	淀川から約500mの低地で、住宅密集地。南側はやや窪地となっているため、周辺より冠水しやすい。下水処理能力が限界を超えると道路冠水が拡大しやすい。	冠水拡大時の現場状況把握と、住民への避難準備・情報伝達、消防・行政の現場連携訓練。	消防による現地状況の詳細把握、住民への避難準備呼びかけ、排水機能の確認、冠水拡大時の迅速な初動体制の構築。	消防からの現場情報の受理、避難準備情報の再度伝達、排水口点検の応援要請、要配慮者リストの再確認、住民の安全確保、必要に応じて避難所開設準備。	排水機能の限界による冠水拡大、住民の避難判断遅延、要配慮者の所在確認遅れ、現場と本部間の情報共有不足	道路で膝下程度の冠水、低地側住宅敷地内にも浸水開始	中度冠水・敷地内浸水	道路冠水が拡大し、歩道や一部住宅の敷地内へも浸水が始まっている。住宅内への本格的な浸水は現時点で確認されていないが、増水が続けば床下浸水の恐れあり。排水口の詰まりも発生し、排水機能が低下。	住民への避難準備呼びかけ、排水口・側溝の詰まり点検・清掃、消防・警察・行政の連携強化、要配慮者の所在確認と個別支援、土のう配布・設置支援	平成25年台風18号時、同地域で道路冠水と一部住宅床下浸水・排水口詰まりによる被害が発生した事例あり。	['道路冠水による通行障害', '歩道・敷地内への浸水拡大', '排水口詰まりによるさらなる水位上昇']	['住宅床下浸水による家財被害', '下水逆流による衛生被害', '要配慮者の避難遅延', '冠水拡大による孤立']
		1-4	500	発災12分後	住宅街南側の低地で床下浸水が複数発生、要配慮者世帯から避難支援要請が入る	住民	朝日二丁目6番地付近の低地側に住む高齢者世帯から、床下に水が入り始めており、身体が不自由なため自力で避難できないとの通報が入った。道路の冠水も膝程度まで進行している。	要配慮者は1世帯（高齢者夫婦のみ）。南側道路の冠水が激しく、家の外へ出るのが難しい。消防には連絡済みだが、到着待ちの状態。	淀川から約500mの低地で住宅密集地。南側は窪地で水が集まりやすく、排水能力を超えると急速に浸水拡大。高齢者世帯も多く、避難困難者が発生しやすい。	床下浸水・要配慮者発生時の安否確認・避難支援要請受理・現場対応指示の訓練。情報の優先順位付けと現場連携の強化を狙う。	要配慮者からの避難支援要請受理、現場への応援・支援班の派遣、床下浸水拡大時の迅速な状況把握と住民安全確保。多機関連携（福祉・消防・警察）の実践。	避難支援要請世帯のリストアップと現場への伝達、消防・警察・福祉部門との連携による支援班派遣、現場状況の継続把握、避難所受け入れ準備の加速、住民への避難情報再通知。	床下浸水拡大による家財被害、要配慮者の避難遅延、支援班の現場到着困難、複数世帯からの同時要請への対応遅延、現場と本部間の情報共有不足	道路で膝程度の冠水、低地側住宅敷地と床下に水が浸入開始	床下浸水・要配慮者避難困難	道路・歩道の冠水がさらに拡大し、複数の住宅で床下浸水が発生。高齢者のみの世帯で自力避難が困難なケースが出ており、避難支援要請が入る。排水口の詰まり箇所も増加。	要配慮者名簿の再確認、避難支援班の迅速派遣、現場状況の逐次把握、排水口・側溝の詰まり解消作業、住民への避難情報再通知、消防・警察・福祉部門の連携強化	平成25年台風18号時、同地域で床下浸水と高齢者避難困難事例あり。避難支援要請が集中し対応が遅れた事例も報告されている。	['床下浸水拡大による家財被害', '要配慮者の避難遅延', '道路冠水による通行障害']	['冠水拡大による孤立世帯の発生', '下水逆流による衛生被害', '支援班の現場到着遅延']
		1-5	500	発災17分後	床下浸水が拡大し、複数住宅で分電盤や電気設備の近くまで水位が上昇。追加の避難支援要請が入る。	消防	消防隊より、朝日二丁目6番地南側の低地エリアで床下浸水がさらに拡大し、複数住宅で分電盤や電気設備のすぐ近くまで水が迫っているとの報告。新たに高齢者世帯1件から避難支援要請が入った。現場は膝程度の冠水で車両進入が困難な状況。	避難支援要請は新たに1世帯（高齢者単身）。現場は既に床下10cm以上の浸水。消防は徒歩での接近を継続中。電気設備への浸水リスクが高まっている。	淀川から約500mの低地で住宅密集地。南側は窪地で水が集まりやすく、排水能力を超えると急速に浸水拡大。高齢者世帯も多い。	床下浸水拡大時の電気設備リスク把握と避難支援要請への迅速対応、現場・本部間の情報共有・連携強化訓練。	電気設備への浸水リスク把握、追加の避難支援要請への優先対応、現場応援体制の再確認、住民・要配慮者の安全確保。	新たな避難支援世帯のリストアップ・現場伝達、電気設備リスクの住民周知、消防・福祉部門との連携で応援班派遣、避難所受け入れ体制の再確認。	床下浸水による感電・火災リスク、複数支援要請への同時対応、車両進入困難による現場到着遅延、情報伝達の遅れ	道路は膝程度の冠水、複数住宅で床下10cm超の浸水、電気設備付近まで水位上昇	床下浸水拡大・電気設備リスク・追加避難困難	床下浸水が10cm以上となり、複数住宅で分電盤や電気設備の近くまで水位が上昇。追加で高齢者世帯から避難支援要請。車両での接近が困難となり、徒歩での対応を強いられる。	電気ブレーカーの早期遮断指導、避難支援班の迅速派遣、住民への感電・火災リスクの注意喚起、消防・警察・福祉部門の連携強化、現場状況の随時把握	平成25年台風18号時、同地域で床下浸水から電気設備被害・感電事故寸前の事例あり。避難支援要請が集中し対応が遅れた事例も報告されている。	['床下浸水拡大による家財・電気設備被害', '感電・火災リスク', '要配慮者の避難遅延']	['冠水拡大による孤立世帯の発生', '下水逆流による衛生被害', '支援班の現場到着遅延']
		1-6	500	発災23分後	床下浸水が継続し、南側の低地住宅で室内への浸水が始まったとの通報が入る。停電発生の報告もあり、住民の不安が高まっている。	住民	朝日二丁目6番地南側の住宅で、床下浸水が続いた後、ついに居室内に水が入り始めた。停電も発生し、家族が暗闇の中で不安を感じている。避難を考えているが、外の水位が高く出られない状態。	現場は南側の窪地。停電は数軒で発生しており、周辺住民も懐中電灯で状況を確認している。消防・電力会社にはすでに連絡済み。	淀川から約500mの低地で住宅密集地。南側は窪地で水が集まりやすく、排水能力を超えると短時間で床上浸水・停電被害が拡大しやすい。高齢者世帯も多い。	床下から床上への浸水、停電発生時の住民対応力・現場指揮・救助判断訓練。多機関連携による情報整理・優先順位付けの強化。	床上浸水・停電同時発生時の現場情報整理、住民の安全確保、避難・救助判断、関係機関との連携強化。	床上浸水・停電世帯のリストアップ、救助・避難班の派遣優先順位付け、消防・電力会社との連携、避難所受け入れ体制の再確認、住民への安全指導・広報。	停電により情報収集・現場確認の遅れ、住民の不安・パニック拡大、夜間避難の安全確保、複数機関間の連携の難しさ	道路は膝程度の冠水が継続、複数住宅で床下10～15cmの浸水、南側低地では床上数cmの浸水と停電発生	床上浸水・停電・避難困難	床下浸水が続いた後、南側低地の複数住宅で床上浸水が発生。停電も一部で発生し、住民は暗闇の中で避難困難な状況。消防・電力会社が対応中だが、現場到着に時間を要している。	床上浸水・停電世帯の優先救助、懐中電灯等の配布・照明確保、住民への避難誘導・安全広報、消防・電力会社との連携強化、現場状況の逐次把握	平成25年台風18号時、同地域で床上浸水・停電・避難困難事例あり。夜間の避難支援が遅れ、住民の不安が拡大した事例も報告されている。	['床上浸水による家財・生活被害', '停電による情報伝達・避難困難', '住民のパニック・体調不良']	['孤立世帯の発生', '感電・火災リスク', '下水逆流による衛生被害', '救助・支援班の現場到着遅延']
		1-7	500	発災27分後	床上浸水が拡大し、一部住宅で下水の逆流や悪臭の発生が報告されている。住民から衛生面や健康被害への不安の声が上がる。	住民	朝日二丁目6番地南側の住宅にて、床上浸水が10cm以上となり、トイレや排水口から水が逆流してきている。室内に悪臭が漂いはじめ、家族が体調不良を訴え始めている。どう対応すればよいかとの相談が自治体窓口に入った。	床上浸水は南側の窪地住宅で顕著。現場は停電も継続。消防・下水道管理部門にはすでに連絡済み。住民の多くは2階や高所で待機中。	淀川から約500mの低地で住宅密集地。南側が窪地で水が集まりやすく、都市型排水能力を超えると短時間で床上浸水・下水逆流・衛生被害が拡大しやすい。高齢者世帯が多い。	床上浸水・下水逆流・衛生被害発生時の住民対応と、保健・生活支援班との連携、現場・本部間の情報整理・優先順位付け訓練。	床上浸水・下水逆流・悪臭時の住民相談対応、衛生リスクへの早期注意喚起、生活支援物資（飲料水・簡易トイレ等）調達・配布準備、関係機関（消防・下水道・保健）との連携強化。	住民への衛生被害防止策（手洗い・飲用水確保・体調管理）の周知、下水道管理部門への現場急行要請、生活支援物資（飲料水・簡易トイレ等）の手配・配布、現場状況の継続把握と本部への即時共有、避難所での受け入れ体制強化。	下水逆流による衛生被害拡大、住民の健康被害（感染症・体調不良）、生活物資の調達・配布遅延、停電下での情報共有の遅れ、複数機関間の連携調整の難しさ	道路は膝程度の冠水が継続、住宅内は床上10cm以上の浸水、下水逆流・悪臭発生、停電も一部継続	床上浸水拡大・下水逆流・衛生被害・停電継続	床上浸水が拡大し、複数住宅で下水の逆流・悪臭が発生。住民は2階や高所に避難中だが、体調不良や衛生面の不安が顕在化。停電も継続し、夜間の避難・救助が困難。生活支援物資のニーズが高まっている。	住民への衛生指導（手洗い・飲用水管理・体調観察）、下水道管理部門との連携強化、簡易トイレ・飲料水等の生活支援物資の手配・配布、避難所での衛生管理体制強化、現場状況の逐次把握・情報共有、消防・保健・福祉部門の連携強化	平成25年台風18号時、同地域で床上浸水・下水逆流・悪臭・感染症リスクが発生。生活物資配布遅延や衛生被害が住民の不安拡大につながった事例あり。	['床上浸水による家財・生活被害', '下水逆流による衛生被害・健康被害', '停電による情報伝達・避難困難', '住民の体調不良・パニック']	['感染症・生活環境悪化による体調不良者発生', '孤立世帯の発生', '感電・火災リスク', '支援班・救助班の現場到着遅延']
		1-8	500	発災35分後	床上浸水・下水逆流・悪臭が継続する中、住民から飲料水や簡易トイレ等の生活支援物資要請が複数自治体窓口に寄せられる。	住民	朝日二丁目6番地南側の住民より『床上浸水が続き、トイレや排水口の逆流・悪臭も収まらない。飲み水やトイレの備えが心配なので、支援物資を届けてほしい』との要請が複数寄せられている。	現場は依然として道路に膝程度の冠水が残り、住宅内は床上10cm以上の浸水が継続。住民の多くは2階や高所で待機。消防・下水道管理部門には先行して連絡済み。要配慮者世帯も物資要請に含まれている。	淀川から約500mの低地で住宅密集地。南側が窪地で水が集まりやすく、都市型排水能力を超えると短時間で床上浸水・下水逆流・衛生被害が拡大しやすい。高齢者世帯が多い。	長期化する床上浸水・下水逆流時の生活支援物資のニーズ把握と、支援物資調達・配布体制の迅速な構築、現場・本部間および関係機関連携の実践訓練。	住民からの生活支援物資要請の受理・優先度判断、物資調達・配布ルートの確保、要配慮者世帯への個別対応、現場状況の継続把握と迅速な情報共有。	住民からの要請内容の詳細聴取、物資（飲料水・簡易トイレ等）の調達・搬送指示、要配慮者世帯リストとの突合・優先配布、消防・福祉・保健部門との連携、現場状況の継続的な把握・本部への即時報告。	物資調達・搬送の遅延、冠水による配布困難、要配慮者世帯への個別対応の遅れ、複数機関間の情報伝達の混乱、住民の不安拡大	道路は膝程度の冠水継続、住宅内は床上10cm以上の浸水、下水逆流・悪臭あり、停電も一部継続	床上浸水長期化・下水逆流・生活支援物資不足・衛生被害・停電継続	床上浸水と下水逆流・悪臭が継続する中、住民から飲料水や簡易トイレなどの生活支援物資要請が複数発生。要配慮者世帯も含まれ、現場では物資不足・生活環境悪化への不安が拡大している。停電も一部継続し、住民のストレスが高まっている。	生活支援物資（飲料水・簡易トイレ等）の迅速な調達・配布、要配慮者世帯への個別支援、下水道管理部門との連携強化、現場状況の逐次把握、避難所の衛生管理体制強化、住民への衛生指導	平成25年台風18号時、同地域で床上浸水・下水逆流・生活物資不足が発生し、物資配布遅延や衛生被害が住民の不安拡大につながった事例あり。	['床上浸水継続による家財・生活被害', '下水逆流による衛生被害・健康被害', '生活物資不足による住民の体調不良・不安拡大', '停電による情報伝達・避難困難']	['感染症・生活環境悪化による体調不良者発生', '孤立世帯の発生', '感電・火災リスク', '支援班・救助班の現場到着遅延']
		1-9	500	発災38分後	床上浸水・下水逆流・生活支援物資不足が継続する中、住民の一部から体調不良（軽度の吐き気や頭痛）が報告され、保健師の派遣要請が自治体窓口に入る。	住民	朝日二丁目6番地南側の住民より『床上浸水と悪臭が続き、家族が頭痛や吐き気を訴えている。医療的な確認をお願いしたい』との要請が入った。	体調不良を訴えているのは高齢者と子どもを含む2世帯。現場は依然として道路に膝程度の冠水、住宅内は床上10cm以上の浸水、悪臭も強い。消防・下水道管理部門・福祉部門には先行して連絡済み。	淀川から約500mの低地で住宅密集地。南側が窪地で水が集まりやすく、都市型排水能力を超えると短時間で床上浸水・下水逆流・衛生被害が拡大しやすい。高齢者世帯が多い。	長期化する浸水・下水逆流に伴う健康被害発生時の保健・医療部門との連携、住民健康被害対応の初動訓練。	住民からの健康被害申告の受理、保健師・医療班の迅速な派遣判断、現場での健康状態確認・応急対応、要配慮者世帯への優先対応、関係機関連携の強化。	体調不良世帯のリストアップと現場への伝達、保健師・医療班の派遣指示、住民への衛生指導・健康被害防止策の再周知、消防・福祉・下水道管理部門との連携、現場状況の継続把握・本部への即時報告。	保健師・医療班の現場到着遅延、冠水によるアクセス困難、健康被害の見逃しや重症化、複数機関間の情報共有の遅れ、住民の不安拡大	道路は膝程度の冠水継続、住宅内は床上10cm以上の浸水、下水逆流・悪臭あり、停電も一部継続	床上浸水長期化・下水逆流・生活支援物資不足・健康被害発生・衛生被害・停電継続	床上浸水と下水逆流・悪臭が継続し、住民の一部で頭痛や吐き気などの体調不良が発生。高齢者や子どもを含む世帯から医療的支援要請が入り、現場では生活環境悪化と健康被害リスクが顕在化している。停電も一部継続し、住民のストレスが高まっている。	生活支援物資（飲料水・簡易トイレ等）の迅速な配布、保健師・医療班の派遣、住民への衛生・健康指導、下水道管理部門との連携強化、現場状況の逐次把握・情報共有、避難所の衛生管理体制強化	平成25年台風18号時、同地域で床上浸水・下水逆流・生活物資不足・健康被害が発生し、医療班の派遣が遅れた事例あり。	['床上浸水継続による家財・生活被害', '下水逆流による衛生被害・健康被害（体調不良者発生）', '生活物資不足による住民の体調不良・不安拡大', '停電による情報伝達・避難困難']	['感染症・生活環境悪化による体調不良者発生', '孤立世帯の発生', '感電・火災リスク', '支援班・救助班・医療班の現場到着遅延']
		1-10	500	発災43分後	床上浸水・下水逆流・生活支援物資不足・健康被害が継続する中、現場に到着した保健師・医療班から、避難所への搬送が必要な体調不良者が複数確認されたとの報告が入る。	保健師（現場医療班）	現地に到着した保健師から『朝日二丁目6番地南側の住宅で、床上浸水と悪臭が続く中、頭痛や吐き気を訴える高齢者2名と子ども1名が脱水症状も疑われる状態。徒歩での避難が難しいため、搬送支援を要請したい』との報告。	体調不良者は要配慮者リストに該当する高齢者世帯と、子どもを含む世帯。現場は依然として道路に膝程度の冠水、住宅内は床上10cm以上の浸水、悪臭も強い。消防・福祉・下水道管理部門には先行して連絡済み。	淀川から約500mの低地で住宅密集地。南側が窪地で水が集まりやすく、都市型排水能力を超えると短時間で床上浸水・下水逆流・衛生被害が拡大しやすい。高齢者世帯が多い。	長期化する浸水・下水逆流・生活支援物資不足・健康被害発生時の多機関連携による搬送支援、避難所での受け入れ体制の実践訓練。	現場医療班からの健康被害・搬送要請の受理、要配慮者・体調不良者の優先搬送判断、搬送手段（徒歩・ボート等）の選定、消防・福祉部門との連携、避難所での受け入れ準備。	体調不良者・要配慮者世帯のリストアップと現場への伝達、搬送手段の迅速な決定・派遣、消防・福祉部門との連携による搬送支援、避難所での健康管理体制強化、現場状況の継続的な把握・本部への即時報告。	冠水による搬送困難、搬送手段・人員の不足、避難所での健康管理・衛生体制の遅れ、複数機関間の連携・情報共有の遅延、住民の不安拡大	道路は膝程度の冠水継続、住宅内は床上10cm以上の浸水、下水逆流・悪臭あり、停電も一部継続	床上浸水長期化・下水逆流・生活支援物資不足・健康被害重症化・避難困難・停電継続	床上浸水と下水逆流・悪臭が継続し、住民の一部で頭痛や吐き気、脱水症状などの体調不良が重症化。高齢者や子どもを含む複数世帯で自力避難困難となり、医療班から搬送支援要請が入る。現場は冠水・浸水・悪臭・停電が継続し、住民のストレスと健康被害リスクが高まっている。	体調不良者・要配慮者の優先搬送体制の強化、搬送手段（ボート・高床車等）の確保、保健師・医療班・消防・福祉部門の連携強化、避難所での健康管理・衛生体制の徹底、生活支援物資の迅速な配布・現場状況の逐次把握	平成25年台風18号時、同地域で床上浸水・下水逆流・生活物資不足・健康被害重症化・搬送困難事例が発生。医療班・救助班の派遣が遅れ、住民の不安・体調悪化が拡大した事例あり。	['床上浸水継続による家財・生活被害', '下水逆流による衛生被害・健康被害（体調不良者重症化）', '生活物資不足による住民の体調不良・不安拡大', '搬送困難による重症化リスク', '停電による情報伝達・避難困難']	['感染症・生活環境悪化による体調不良者発生', '孤立世帯の発生', '感電・火災リスク', '支援班・救助班・医療班の現場到着遅延']
		1-11	500	発災50分後	床上浸水・下水逆流・悪臭が継続し、避難希望者の搬送が進められている中、追加で高齢者世帯から避難所への搬送要請が入る。搬送班・誘導班の現場調整と搬送ルートの再確認が必要となる。	消防	避難希望者の搬送を実施中の消防隊から『追加で高齢者のみの世帯から避難所への搬送希望が入った。現場周辺は依然として道路の冠水が膝程度あり、徒歩搬送は困難。応援班の派遣と搬送ルートの再調整を要請したい』との報告。	追加搬送希望は高齢者世帯2件。現場は膝程度の冠水と床上浸水、悪臭が継続。既に複数世帯の搬送が進行中で、搬送班は一部手薄になっている。	淀川から約500mの低地で住宅密集地。南側が窪地となっており、水が集まりやすい。都市型排水能力を超えた状態が長期化しやすく、高齢者世帯も多い。	避難希望者の増加時における現場搬送体制の再調整や応援要請、多機関連携による搬送ルート・安全確保の実践訓練。	避難希望者・要配慮者の追加搬送要請への迅速対応、搬送ルート・手段（徒歩・ボート等）の再検討、現場班・本部・関係機関（消防・福祉・保健）間の連携調整。	追加避難希望世帯のリストアップ、搬送班・応援班の編成・現場派遣、冠水エリアの搬送ルート再確認、消防・福祉部門との連携による安全な搬送実施、避難所の受け入れ体制再確認、住民への衛生・健康指導再周知。	搬送希望者の増加による対応遅延、搬送班・応援班の人員不足、冠水による搬送困難、要配慮者の個別対応遅延、複数機関間の調整・情報共有の混乱	道路は膝程度の冠水継続、住宅内は床上10cm以上の浸水、下水逆流・悪臭あり、停電も一部継続	床上浸水長期化・下水逆流・衛生被害・避難希望者増加・追加搬送要請	床上浸水と下水逆流・悪臭が継続し、住民の一部で体調不良や生活環境悪化による避難希望が増加。高齢者世帯から追加で避難所搬送要請が入り、搬送班の再編成や搬送ルートの見直しが必要となっている。現場は冠水・浸水・悪臭が継続し、住民のストレスと健康被害リスクが高まっている。	避難希望者・要配慮者リストの早期更新、搬送・誘導班の迅速派遣と応援体制強化、冠水エリアでの安全な搬送手段（ボート・高床車等）の確保、避難所の衛生・健康管理体制強化、関係機関との連携徹底、住民への衛生・健康指導再徹底	平成25年台風18号時、同地域で床下浸水・下水逆流・悪臭が長期化し、避難希望世帯の搬送遅延や避難所での衛生問題が発生した事例あり。	['床上浸水継続による家財・設備被害', '下水逆流による衛生被害・健康被害（体調不良者の増加）', '避難希望者の増加による搬送遅延・安全確保困難']	['冠水長期化による孤立世帯の発生', '避難所での感染症・生活環境悪化', '支援班・搬送班の現場到着遅延']
		1-12	500	発災52分後	既存避難所の収容人数が限界に近づき、床上浸水・下水逆流・悪臭・健康被害・追加搬送要請が継続する中、行政本部から臨時避難所（サテライト避難所）開設準備の指示が現場班に出される。	行政（本部）	本部より『朝日二丁目6番地周辺の避難希望・体調不良者搬送が続き、既存避難所の受け入れが満員に近づいている。追加の避難希望者や健康悪化者の一時待機場所として、近隣公共施設等を臨時避難所（サテライト避難所）として開設する準備を進めてほしい』との指示。	既存避難所は高齢者・体調不良者で満杯。現場は膝程度の冠水、住宅内は床上10cm以上の浸水、下水逆流・悪臭が継続。サテライト避難所候補は町内会館や小学校体育館など。避難希望世帯や要配慮者のリストアップが進行中。	淀川から約500mの低地で住宅密集地。南側が窪地となっており、水が集まりやすい。都市型排水能力を超えた状態が長期化しやすく、高齢者世帯も多い。	避難所過密・健康被害拡大時の臨時避難所開設判断・現場運用・住民誘導の実践訓練。多機関連携と情報共有の強化を狙う。	避難所過密時の臨時避難所設置判断、現場・本部・関係機関の調整、住民・要配慮者の安全確保、避難誘導・物資搬送・衛生管理体制の迅速構築。	サテライト避難所候補の現地確認・開設指示、避難誘導班・物資搬送班の編成と派遣、現場本部・既存避難所・関係機関（消防・警察・保健・福祉・ボランティア）との連携、住民・要配慮者リストの再整理と優先搬送、衛生・健康管理体制の確立、住民への広報・安全指導。	避難所過密による受け入れ遅延、臨時避難所開設準備の遅れ、物資・人員不足、住民の不安・混乱拡大、現場・本部間の情報伝達遅延、複数機関連携の混乱	道路は膝程度の冠水継続、住宅内は床上10cm以上の浸水、下水逆流・悪臭あり、停電も一部継続	床上浸水長期化・下水逆流・健康被害拡大・避難所過密・臨時避難所開設指示	床上浸水と下水逆流・悪臭が継続し、住民の一部で健康被害が拡大。既存避難所は満員となり、追加の避難希望・体調不良者対応のため、臨時避難所開設の判断・準備が必要となっている。現場は冠水・浸水・悪臭が継続し、住民の不安と健康リスクがさらに高まっている。	サテライト避難所の迅速な開設・運用、避難誘導・物資搬送班の強化、現場本部・既存避難所・関係機関との連携、要配慮者名簿の活用と優先救助・搬送、衛生・健康管理体制の確立、現場・本部間の情報共有徹底、住民への広報・安全指導の徹底	平成25年台風18号時、同地域で床下浸水・避難所過密・臨時避難所開設が必要となった事例あり。物資・人員不足や情報共有遅延による混乱が生じた。	['床上浸水継続による家財・ガス設備・給湯器被害', '下水逆流による衛生被害・健康被害（体調不良者発生）', '生活物資不足による住民の体調不良・不安拡大', '救急搬送困難による重症化リスク', '避難所過密・受け入れ遅延']	['冠水長期化による孤立世帯の発生', '感染症・生活環境悪化による体調不良者増加', '支援班・救助班・医療班・救急隊の現場到着遅延', '臨時避難所開設準備の遅れ・混乱']
		1-13	500	発災59分後	サテライト避難所（臨時避難所）の開設準備が本格化し、避難誘導班・物資搬送班・保健師班が現場に派遣される。避難所間の住民搬送・健康管理・物資配布体制の構築が求められる。	現場班（避難誘導・物資搬送・保健師）	朝日二丁目6番地周辺では、サテライト避難所の開設準備を進めるため、避難誘導班・物資搬送班・保健師班が現場に到着。既存避難所からの追加搬送希望者や要配慮者のリストアップを進めつつ、飲料水・簡易トイレ・衛生資材などの物資配布を開始。健康状態のチェックや避難所間の連絡も並行して実施している。	既存避難所は満員状態で、サテライト避難所（町内会館や学校体育館等）への住民誘導が本格化。搬送には徒歩・ボートを併用。保健師は健康相談・感染症予防指導も担当。現場と本部・避難所間の情報共有は無線・携帯で実施。	淀川から約500mの低地で住宅密集地。南側が窪地となっており、水が集まりやすい。都市型排水能力を超えた状態が長期化しやすく、高齢者世帯も多い。	臨時避難所運用下での多機関連携による避難誘導・物資搬送・健康管理体制の構築訓練。住民安全確保・衛生管理・優先順位判断・情報共有の強化を狙う。	避難所・サテライト避難所間の搬送・物資配布・健康管理の現場オペレーション、要配慮者・体調不良者の優先対応、複数部門連携の実践、現場と本部・避難所間の情報共有迅速化。	避難誘導・搬送班の現場展開、要配慮者・体調不良者リストの再整理・優先搬送、物資（飲料水・トイレ・衛生資材等）のサテライト避難所搬送・配布、保健師による健康チェック・感染症予防指導、現場と本部・避難所間の情報共有体制強化。	搬送・物資配布の遅延、搬送希望者の増加による現場混乱、要配慮者・体調不良者の個別対応の遅れ、複数機関間の調整・情報伝達の混乱、住民の不安拡大、夜間対応や停電時の活動困難	道路は膝程度の冠水継続、住宅内は床上10cm以上の浸水、下水逆流・悪臭あり、停電も一部継続	床上浸水長期化・下水逆流・健康被害拡大・避難所過密・臨時避難所運用・多機関連携搬送・物資配布	床上浸水と下水逆流・悪臭が継続し、住民の一部で健康被害が拡大。既存避難所は満員、サテライト避難所への搬送・物資配布・健康管理が本格化。複数部門（避難誘導・物資搬送・保健師）が連携し、住民安全確保・衛生管理・優先搬送に取り組む現場運用が進む。	サテライト避難所の迅速な運用、避難誘導・物資搬送・健康管理班の現場展開・連携、要配慮者名簿の活用と優先救助・搬送、衛生・健康管理体制の確立、現場・本部・避難所間の情報共有徹底、住民への広報・安全指導の徹底	平成25年台風18号時、同地域で床下浸水・避難所過密・臨時避難所開設・多機関連携搬送・物資配布が必要となった事例あり。物資・人員不足や情報共有遅延による混乱が生じた。	['床上浸水継続による家財・ガス設備・給湯器被害', '下水逆流による衛生被害・健康被害（体調不良者発生）', '生活物資不足による住民の体調不良・不安拡大', '救急搬送困難による重症化リスク', '避難所過密・受け入れ遅延']	['冠水長期化による孤立世帯の発生', '感染症・生活環境悪化による体調不良者増加', '支援班・救助班・医療班・救急隊の現場到着遅延', '臨時避難所運用・物資配布の遅延・混乱']
		1-14	500	発災62分後	サテライト避難所の本格稼働に伴い、既存避難所・臨時避難所間での高齢者や体調不良者の優先搬送、医療物資の再配分調整が必要となる。	現場班（避難誘導・物資搬送・保健師）	朝日二丁目6番地周辺のサテライト避難所・既存避難所の双方で、体調不良者や高齢者の増加に伴い、解熱剤や消毒液、簡易ベッドなどの医療物資が不足し始めたとの現場報告。避難所間での物資再配分と、体調不良者の優先搬送・健康チェックが求められている。	避難所間の連絡は無線と携帯を併用。既存避難所・サテライト避難所ともに収容数が限界に近く、今後も追加搬送希望者が見込まれる。保健師は健康相談・感染症予防指導も担当。	淀川から約500mの低地。住宅密集地で南側が窪地となっており、水が集まりやすい。都市型排水能力を超えた状態が長期化しやすく、高齢者世帯も多い。	複数避難所運用下での医療・物資・人員配分の現場調整、多機関連携による健康被害抑制・優先順位判断・情報共有の実践力向上を狙う。	避難所間の物資・人員調整、体調不良者・高齢者の優先搬送・健康管理、現場班・本部・医療機関との情報共有・連携強化、住民安全確保・衛生維持。	医療物資・衛生資材の優先搬送、体調不良者・高齢者リストの再整理と優先搬送、保健師・医療スタッフの現場展開、避難所間・本部との情報共有、住民健康状態の把握・健康相談体制強化、関係機関（保健・福祉・医療・ボランティア）との連携調整。	医療物資・スタッフ不足、避難所間搬送・調整の遅延、健康被害拡大への即応困難、住民不安・混乱拡大、夜間・停電下での応急対応困難、複数機関連携の調整遅延	道路は膝程度の冠水継続、住宅内は床上10cm以上の浸水、下水逆流・悪臭あり、停電も一部継続	床上浸水長期化・下水逆流・健康被害拡大・避難所過密・臨時避難所運用・医療資源逼迫	床上浸水と下水逆流・悪臭が継続し、住民の一部で健康被害が拡大。既存避難所・サテライト避難所ともに満員に近く、医療スタッフ・医薬品の不足が深刻化。高齢者や体調不良者の優先搬送・健康管理、避難所間での医療物資再配分調整が必要となり、現場対応が逼迫している。	サテライト避難所の迅速な運用、避難誘導・物資搬送・健康管理班の現場展開強化、要配慮者名簿の活用と優先救助・搬送、衛生・健康管理体制の確立、現場・本部・避難所間の情報共有徹底、住民への広報・安全指導の徹底、医療機関との連携強化	平成25年台風18号時、同地域で床下浸水・避難所過密・臨時避難所開設・医療応援要請が必要となった事例あり。物資・人員不足や情報共有遅延による混乱が生じた。	['床上浸水継続による家財・ガス設備・給湯器被害', '下水逆流による衛生被害・健康被害（体調不良者発生）', '生活物資不足による住民の体調不良・不安拡大', '救急搬送困難による重症化リスク', '避難所過密・受け入れ遅延', '医療資源逼迫による健康被害拡大']	['冠水長期化による孤立世帯の発生', '感染症・生活環境悪化による体調不良者増加', '支援班・救助班・医療班・救急隊の現場到着遅延', '臨時避難所運用・物資配布の遅延・混乱']
		1-15	500	発災69分後	サテライト避難所・既存避難所双方で夜間対応のための照明・発電機の不足や、避難所間搬送の遅延が現場から指摘される。夜間の住民安否確認や体調急変時の対応体制強化が求められる。	現場班（避難誘導・物資搬送・保健師）	朝日二丁目6番地周辺では、夜間に備えた照明・発電機が不足しているとの現場報告が入った。避難所間の搬送や物資配布は継続中だが、夜間の安全確保と住民安否確認のため、追加の照明器具や発電機の手配、巡回班の編成が必要との指摘。	現場は膝程度の冠水と床上10cm以上の浸水が継続。避難所・サテライト避難所ともに満員に近く、夜間対応人員も限られている。高齢者・要配慮者世帯が多く、夜間の体調急変や転倒リスクも懸念される。	淀川から約500mの低地。住宅密集地で南側が窪地となっており、水が集まりやすい。都市型排水能力を超えた状態が長期化しやすく、高齢者世帯も多い。	夜間・停電時の避難所運営、現場安全管理、住民安否確認体制の実践訓練。多機関連携による夜間対応力と情報共有の強化を狙う。	夜間の照明・電源確保、避難所間・現場での住民安否確認、要配慮者・高齢者の夜間見守り体制、現場班・本部・関係機関間の連携強化。	照明器具・発電機の追加手配と搬送、夜間巡回班の編成・現場展開、避難所・現場での住民安否確認・体調チェック、関係機関（保健・福祉・ボランティア）との連携、夜間連絡体制の再確認。	照明・電源不足による安全確保困難、夜間巡回の人員不足、住民の体調急変・転倒事故の発見遅延、複数機関間での夜間情報共有の遅れ、住民不安の拡大	道路は膝程度の冠水継続、住宅内は床上10cm以上の浸水、下水逆流・悪臭あり、停電も一部継続	床上浸水長期化・下水逆流・健康被害拡大・避難所過密・夜間対応・照明電源不足	床上浸水と下水逆流・悪臭が継続。避難所・サテライト避難所ともに満員に近く、夜間に備えた照明・電源の不足が顕在化。夜間の住民安否確認や体調急変への対応体制が求められ、現場の安全確保が課題となっている。	夜間対応用照明・発電機の事前備蓄・迅速搬送、巡回班の夜間配置、要配慮者・高齢者見守り体制の強化、現場・本部・避難所間の夜間連絡体制徹底、住民への安全指導・体調急変時の連絡方法周知	平成25年台風18号時、同地域で夜間の照明・発電機不足、避難所・現場での安否確認遅延、体調急変時の発見遅れが報告されている。	['床上浸水継続による家財・ガス設備・給湯器被害', '下水逆流による衛生被害・健康被害（体調不良者発生）', '生活物資不足による住民の体調不良・不安拡大', '夜間・停電下での事故・体調急変の発見遅延', '避難所過密・受け入れ遅延', '医療資源逼迫による健康被害拡大']	['冠水長期化による孤立世帯の発生', '感染症・生活環境悪化による体調不良者増加', '支援班・救助班・医療班・救急隊の現場到着遅延', '臨時避難所運用・物資配布の遅延・混乱', '夜間対応困難による住民不安の拡大']
		1-16	500	発災72分後	夜間に入り、避難所・サテライト避難所の満員状態が継続する中、追加の体調不良者・高齢者の搬送希望や避難所間の医療物資・照明機器不足が現場班から報告される。現場の夜間巡回体制強化と追加物資搬送の調整が求められる。	現場班（避難誘導・物資搬送・保健師）	朝日二丁目6番地周辺では、夜間に入り体調不良を訴える高齢者・要配慮者の追加搬送希望が複数世帯から寄せられている。避難所・サテライト避難所ともに満員状態が続き、医療物資や照明機器、発電機も不足気味。夜間の安全確保と体調急変時の対応体制強化が必要との現場報告。	追加搬送希望は高齢者・体調不良者世帯中心に3世帯以上。夜間巡回班も人員不足。避難所・サテライト避難所間での物資再配分や照明機器搬送が急務。現場と本部・避難所間の連絡は無線・携帯併用。	淀川から約500mの低地。住宅密集地で南側が窪地となっており、水が集まりやすい。都市型排水能力を超えた状態が長期化しやすく、高齢者世帯も多い。	夜間・医療資源逼迫時の多機関連携による応急対応、追加物資・人員手配、現場調整・優先順位判断・情報共有体制の強化を訓練する。	医療スタッフ・物資・照明機器の迅速な追加手配、体調不良者・高齢者の優先搬送、夜間の現場安全確保、本部・現場・避難所間の連携・情報共有の実践。	追加の医療スタッフ・医薬品・照明機器の手配と搬送、体調不良者・高齢者のリスト再整理と優先搬送指示、夜間の現場安全管理体制の強化、現場班・本部・避難所間の情報共有・連絡体制の再確認、住民への健康・安全指導の徹底。	医療スタッフ・物資の不足、夜間・停電下での搬送・応急対応の困難、複数機関間の調整・情報伝達の遅延、住民不安・混乱の拡大、体調急変や転倒事故の発見遅延	道路は膝程度の冠水継続、住宅内は床上10cm以上の浸水、下水逆流・悪臭あり、停電も一部継続	床上浸水長期化・下水逆流・健康被害拡大・避難所過密・夜間対応・医療資源逼迫・追加搬送要請	床上浸水と下水逆流・悪臭が継続し、夜間に入り体調不良者や高齢者の搬送希望がさらに増加。避難所・サテライト避難所ともに満員で、医療スタッフ・医薬品・照明機器の不足が深刻化。現場班・本部間の調整が逼迫し、夜間の安全確保と迅速な応急対応が課題となっている。	医療スタッフ・医薬品・照明機器の事前備蓄・迅速搬送、夜間巡回班の配置強化、要配慮者・高齢者見守り体制の徹底、現場・本部・避難所間の情報共有体制強化、住民への健康・安全指導・体調急変時の連絡方法周知、医療機関・ボランティアとの連携強化	平成25年台風18号時、同地域で夜間の照明・発電機・医療資源不足、避難所・現場での安否確認遅延、体調急変時の発見遅れや搬送困難が報告されている。	['床上浸水継続による家財・ガス設備・給湯器被害', '下水逆流による衛生被害・健康被害（体調不良者発生）', '生活物資不足・医療資源逼迫による住民の体調不良・不安拡大', '夜間・停電下での事故・体調急変の発見遅延', '避難所過密・受け入れ遅延', '追加搬送希望者の増加による対応遅延']	['冠水長期化による孤立世帯の発生', '感染症・生活環境悪化による体調不良者増加', '支援班・救助班・医療班・救急隊の現場到着遅延', '臨時避難所運用・物資配布の遅延・混乱', '夜間対応困難による住民不安の拡大']
		1-17	500	発災79分後	夜間対応が続く中、避難所・サテライト避難所で体調不良者や高齢者の搬送希望がさらに増加し、医療スタッフ・医薬品・照明機器・搬送車両の追加手配、現場班・本部・関係機関間の優先順位付けと調整が求められる。	本部（医療・現場調整班）	『避難所・サテライト避難所で体調不良者や高齢者の増加が続き、応急手当や健康管理のための医療スタッフ・医薬品・搬送車両が引き続き不足している。夜間対応のため照明・発電機の追加手配も必要。現場班・本部・関係機関で優先順位を再確認し、搬送・応急対応の調整を強化する必要あり』との報告。	搬送希望者リストは増加傾向。夜間対応のための照明・発電機は一部現場に到着済みだが、全避難所への配備は未了。医療スタッフ・保健師の現場展開も継続的に調整中。	淀川から約500mの低地。住宅密集地で南側が窪地となっており、水が集まりやすい。都市型排水能力を超えた状態が長期化しやすく、高齢者世帯も多い。	医療資源逼迫・夜間対応下での多機関連携による優先順位判断・現場調整・情報共有の徹底訓練。現場主導による応急対応力・調整力の強化を狙う。	医療物資・スタッフ・搬送車両の追加手配と現場調整、夜間対応体制の再点検、優先順位判断・情報共有の徹底、住民健康管理と安全維持。	医療スタッフ・医薬品・搬送車両・照明機器・発電機の追加手配、体調不良者・高齢者リストの再整理と優先搬送、現場班と本部・関係機関（保健・福祉・医療・ボランティア）との連携強化、夜間の安全確保・健康相談体制の強化、住民への健康・安全指導の再徹底。	医療スタッフ・物資・搬送車両の不足、夜間・停電下での応急対応困難、優先順位判断の混乱、住民不安・混乱拡大、複数機関連携の調整遅延、体調急変や事故への即応困難	道路は膝程度の冠水継続、住宅内は床上10cm以上の浸水、下水逆流・悪臭あり、停電も一部継続	床上浸水長期化・下水逆流・健康被害拡大・避難所過密・夜間対応・医療資源逼迫・追加搬送要請	床上浸水と下水逆流・悪臭が継続し、夜間に入り体調不良者や高齢者の搬送希望がさらに増加。避難所・サテライト避難所ともに満員で、医療スタッフ・医薬品・照明機器の不足が深刻化。現場班・本部間の調整が逼迫し、夜間の安全確保と迅速な応急対応が課題となっている。	医療スタッフ・医薬品・照明機器の事前備蓄・迅速搬送、夜間巡回班の配置強化、要配慮者・高齢者見守り体制の徹底、現場・本部・避難所間の情報共有体制強化、住民への健康・安全指導・体調急変時の連絡方法周知、医療機関・ボランティアとの連携強化	平成25年台風18号時、同地域で夜間の照明・発電機・医療資源不足、避難所・現場での安否確認遅延、体調急変時の発見遅れや搬送困難が報告されている。	['床上浸水継続による家財・ガス設備・給湯器被害', '下水逆流による衛生被害・健康被害（体調不良者発生）', '生活物資不足・医療資源逼迫による住民の体調不良・不安拡大', '夜間・停電下での事故・体調急変の発見遅延', '避難所過密・受け入れ遅延', '追加搬送希望者の増加による対応遅延']	['冠水長期化による孤立世帯の発生', '感染症・生活環境悪化による体調不良者増加', '支援班・救助班・医療班・救急隊の現場到着遅延', '臨時避難所運用・物資配布の遅延・混乱', '夜間対応困難による住民不安の拡大']
		1-18	500	発災82分後	夜間対応が続く中、避難所・サテライト避難所の現場で体調不良者・高齢者の追加搬送希望がさらに増加し、医療スタッフ・照明機器・搬送車両の配備状況や応急対応の優先順位確認のため、本部・現場班・関係機関の緊急調整会議が開催される。	本部（現場調整班）	『避難所・サテライト避難所で体調不良者や高齢者の追加搬送希望が続いている。夜間対応のための照明・発電機・医療スタッフ・搬送車両の配備状況を現場班から至急報告し、応急対応の優先順位を再確認するための緊急オンライン会議を開催する』との本部指示が現場班に発信された。	照明・発電機の一部は現場到着済みだが、全避難所への配備は未了。医療スタッフ・保健師の現場展開も調整中。搬送希望者リストは増加傾向。現場と本部・関係機関の連携が重要となっている。	淀川から約500mの低地で住宅密集地。南側が窪地となっており、水が集まりやすい。都市型排水能力を超えた状態が長期化しやすく、高齢者世帯も多い。	医療資源逼迫・夜間対応下での現場と本部・関係機関の優先順位判断・情報共有・応急対応体制強化を訓練する。	現場リーダー・本部・関係機関による情報共有と優先順位判断、医療スタッフ・照明機器・搬送車両の追加手配状況の把握、夜間の応急対応体制の再構築。	現場班から最新の搬送希望者・体調不良者リストと資機材配備状況を本部へ即時報告、緊急会議で優先順位を協議し応急対応を再指示、医療・照明・搬送資機材の追加手配、夜間巡回班の再編成、住民への健康・安全指導の徹底。	医療スタッフ・物資・搬送車両・照明機器の不足、夜間・停電下での応急対応困難、優先順位判断の混乱、現場と本部・関係機関間の情報伝達遅延、住民不安・混乱拡大、体調急変や事故への即応困難	道路は膝程度の冠水継続、住宅内は床上10cm以上の浸水、下水逆流・悪臭あり、停電も一部継続	床上浸水長期化・下水逆流・健康被害拡大・避難所過密・夜間対応・医療資源逼迫・追加搬送要請	床上浸水と下水逆流・悪臭が継続。夜間に入り体調不良者や高齢者の搬送希望がさらに増加。避難所・サテライト避難所ともに満員で、医療スタッフ・医薬品・照明機器の不足が深刻化。現場班・本部間の調整が逼迫し、夜間の安全確保と迅速な応急対応が課題となっている。	医療スタッフ・医薬品・照明機器の事前備蓄・迅速搬送、夜間巡回班の配置強化、要配慮者・高齢者見守り体制の徹底、現場・本部・避難所間の情報共有体制強化、住民への健康・安全指導・体調急変時の連絡方法周知、医療機関・ボランティアとの連携強化	平成25年台風18号時、同地域で夜間の照明・発電機・医療資源不足、避難所・現場での安否確認遅延、体調急変時の発見遅れや搬送困難が報告されている。	['床上浸水継続による家財・ガス設備・給湯器被害', '下水逆流による衛生被害・健康被害（体調不良者発生）', '生活物資不足・医療資源逼迫による住民の体調不良・不安拡大', '夜間・停電下での事故・体調急変の発見遅延', '避難所過密・受け入れ遅延', '追加搬送希望者の増加による対応遅延']	['冠水長期化による孤立世帯の発生', '感染症・生活環境悪化による体調不良者増加', '支援班・救助班・医療班・救急隊の現場到着遅延', '臨時避難所運用・物資配布の遅延・混乱', '夜間対応困難による住民不安の拡大']
		1-19	500	発災87分後	夜間対応が続く中、避難所・サテライト避難所で体調不良者や高齢者の追加搬送希望がさらに増加し、医療スタッフ・照明機器・搬送車両の配備状況や応急対応の優先順位確認のため、現場班・本部・関係機関による夜間緊急ミーティングが開催される。	本部（現場調整班）	『避難所・サテライト避難所で体調不良者や高齢者の搬送希望がさらに増加している。夜間対応のための照明・発電機・医療スタッフ・搬送車両の配備状況を現場班から至急報告し、応急対応の優先順位を再確認するため、現場班・本部・関係機関の夜間緊急ミーティングを開催する』との連絡が本部から現場班に入った。	照明・発電機は一部現場に到着済みだが、全避難所への配備は未了。医療スタッフ・保健師の現場展開も調整中。搬送希望者リストは増加傾向。現場と本部・関係機関の連携が重要となっている。	淀川から約500mの低地で住宅密集地。南側が窪地となっており、水が集まりやすい。都市型排水能力を超えた状態が長期化しやすく、高齢者世帯も多い。	医療資源逼迫・夜間対応下での現場と本部・関係機関の優先順位判断・情報共有・応急対応体制強化を訓練する。	現場リーダー・本部・関係機関による情報共有と優先順位判断、医療スタッフ・照明機器・搬送車両の追加手配状況の把握、夜間の応急対応体制の再構築。	現場班から最新の搬送希望者・体調不良者リストと資機材配備状況を本部へ即時報告、緊急会議で優先順位を協議し応急対応を再指示、医療・照明・搬送資機材の追加手配、夜間巡回班の再編成、住民への健康・安全指導の徹底。	医療スタッフ・物資・搬送車両・照明機器の不足、夜間・停電下での応急対応困難、優先順位判断の混乱、現場と本部・関係機関間の情報伝達遅延、住民不安・混乱拡大、体調急変や事故への即応困難	道路は膝程度の冠水継続、住宅内は床上10cm以上の浸水、下水逆流・悪臭あり、停電も一部継続	床上浸水長期化・下水逆流・健康被害拡大・避難所過密・夜間対応・医療資源逼迫・追加搬送要請	床上浸水と下水逆流・悪臭が継続。夜間に入り体調不良者や高齢者の搬送希望がさらに増加。避難所・サテライト避難所ともに満員で、医療スタッフ・医薬品・照明機器の不足が深刻化。現場班・本部間の調整が逼迫し、夜間の安全確保と迅速な応急対応が課題となっている。	医療スタッフ・医薬品・照明機器の事前備蓄・迅速搬送、夜間巡回班の配置強化、要配慮者・高齢者見守り体制の徹底、現場・本部・避難所間の情報共有体制強化、住民への健康・安全指導・体調急変時の連絡方法周知、医療機関・ボランティアとの連携強化	平成25年台風18号時、同地域で夜間の照明・発電機・医療資源不足、避難所・現場での安否確認遅延、体調急変時の発見遅れや搬送困難が報告されている。	['床上浸水継続による家財・ガス設備・給湯器被害', '下水逆流による衛生被害・健康被害（体調不良者発生）', '生活物資不足・医療資源逼迫による住民の体調不良・不安拡大', '夜間・停電下での事故・体調急変の発見遅延', '避難所過密・受け入れ遅延', '追加搬送希望者の増加による対応遅延']	['冠水長期化による孤立世帯の発生', '感染症・生活環境悪化による体調不良者増加', '支援班・救助班・医療班・救急隊の現場到着遅延', '臨時避難所運用・物資配布の遅延・混乱', '夜間対応困難による住民不安の拡大']
		1-20	500	発災92分後	夜間対応が継続する中、避難所・サテライト避難所で体調不良者・高齢者の健康観察および夜間巡回を強化。現場班からは新たな急変者は出ていないものの、搬送希望者リストがさらに増加し、照明・発電機のバッテリー残量低下が一部現場で報告されている。	現場班（避難誘導・医療・保健師）	『避難所・サテライト避難所で体調不良者や高齢者の健康観察と夜間巡回を継続中。新たな急変者は現時点で発生していないが、搬送希望者リストが増加傾向。照明・発電機も一部現場でバッテリー残量が低下し始めており、追加手配が必要』との報告。	夜間で気温が低下傾向。健康相談・応急手当のニーズが高く、医療スタッフ・保健師の現場展開が継続中。搬送希望者の優先順位付けは本部と連携して実施。	淀川から約500mの低地で住宅密集地。南側が窪地となっており、水が集まりやすい。都市型排水能力を超えた状態が長期化しやすく、高齢者世帯も多い。	夜間・医療資源逼迫下での現場主導による健康観察・搬送調整・資機材管理体制の徹底訓練。住民の体調急変・安全確保、現場と本部・関係機関の連携強化を狙う。	夜間健康観察・巡回体制の維持、搬送希望者の優先順位付け、照明・発電機等の資機材管理・追加手配、現場と本部・関係機関の迅速な情報共有。※現場リーダーの判断・調整力がポイント	現場班による定時の健康観察・夜間巡回、搬送希望者リストの本部共有と優先順位付け、照明・発電機のバッテリー点検・追加手配、急変時の応急対応準備、住民への健康・安全指導、現場と本部・関係機関の情報共有体制強化。	医療スタッフ・資機材の不足、夜間・停電下での健康観察・応急対応の困難、搬送希望者の増加による調整遅延、現場と本部・関係機関間の情報伝達遅延、住民不安・混乱拡大、体調急変や事故への即応困難	道路は膝程度の冠水継続、住宅内は床上10cm以上の浸水、下水逆流・悪臭あり、停電も一部継続	床上浸水長期化・下水逆流・健康被害拡大・避難所過密・夜間対応・医療資源逼迫・追加搬送要請	床上浸水と下水逆流・悪臭が継続。夜間に入り体調不良者や高齢者の搬送希望がさらに増加。避難所・サテライト避難所ともに満員で、医療スタッフ・医薬品・照明機器の不足が深刻化。現場班・本部間の調整が逼迫し、夜間の安全確保と迅速な応急対応が課題となっている。	医療スタッフ・医薬品・照明機器の事前備蓄・迅速搬送、夜間巡回班の配置強化、要配慮者・高齢者見守り体制の徹底、現場・本部・避難所間の情報共有体制強化、住民への健康・安全指導・体調急変時の連絡方法周知、医療機関・ボランティアとの連携強化	平成25年台風18号時、同地域で夜間の照明・発電機・医療資源不足、避難所・現場での安否確認遅延、体調急変時の発見遅れや搬送困難が報告されている。	['床上浸水継続による家財・ガス設備・給湯器被害', '下水逆流による衛生被害・健康被害（体調不良者発生）', '生活物資不足・医療資源逼迫による住民の体調不良・不安拡大', '夜間・停電下での事故・体調急変の発見遅延', '避難所過密・受け入れ遅延', '追加搬送希望者の増加による対応遅延']	['冠水長期化による孤立世帯の発生', '感染症・生活環境悪化による体調不良者増加', '支援班・救助班・医療班・救急隊の現場到着遅延', '臨時避難所運用・物資配布の遅延・混乱', '夜間対応困難による住民不安の拡大']
		1-21	500	発災99分後	夜間対応が継続する中、避難所・サテライト避難所の現場では体調不良者・高齢者の健康観察と夜間巡回、資機材（照明・発電機等）のバッテリー残量確認、搬送希望者リストの最新化が求められている。	現場班（避難誘導・保健師）	『避難所・サテライト避難所で体調不良者や高齢者の健康観察、夜間巡回を継続中。新たな急変者は現時点で発生していないが、搬送希望者リストがさらに増加。照明・発電機のバッテリー残量が低下し始めている現場があり、追加手配も必要』との報告が本部に入っている。	夜間で気温が低下傾向。健康相談・応急手当のニーズが高く、医療スタッフ・保健師の現場展開が継続中。搬送希望者の優先順位付けは本部と連携して実施。照明・発電機のバッテリー残量が心配な現場もある。	淀川から約500mの低地で住宅密集地。南側が窪地となっており、水が集まりやすい。都市型排水能力を超えた状態が長期化しやすく、高齢者世帯も多い。	夜間・医療資源逼迫下での現場主導による健康観察・搬送調整・資機材管理体制の徹底訓練。住民の体調急変・安全確保、現場と本部・関係機関の連携強化を狙う。	夜間健康観察・巡回体制の維持、搬送希望者の優先順位付け、照明・発電機等の資機材管理・追加手配、現場と本部・関係機関の迅速な情報共有。現場リーダーの判断・調整力がポイント。	現場班による定時の健康観察・夜間巡回、搬送希望者リストの本部共有と優先順位付け、照明・発電機のバッテリー点検・追加手配、急変時の応急対応準備、住民への健康・安全指導、現場と本部・関係機関の情報共有体制強化。	医療スタッフ・資機材の不足、夜間・停電下での健康観察・応急対応の困難、搬送希望者の増加による調整遅延、現場と本部・関係機関間の情報伝達遅延、住民不安・混乱拡大、体調急変や事故への即応困難	道路は膝程度の冠水継続、住宅内は床上10cm以上の浸水、下水逆流・悪臭あり、停電も一部継続	床上浸水長期化・下水逆流・健康被害拡大・避難所過密・夜間対応・医療資源逼迫・追加搬送要請	床上浸水と下水逆流・悪臭が継続。夜間に入り体調不良者や高齢者の搬送希望がさらに増加。避難所・サテライト避難所ともに満員で、医療スタッフ・医薬品・照明機器の不足が深刻化。現場班・本部間の調整が逼迫し、夜間の安全確保と迅速な応急対応が課題となっている。	医療スタッフ・医薬品・照明機器の事前備蓄・迅速搬送、夜間巡回班の配置強化、要配慮者・高齢者見守り体制の徹底、現場・本部・避難所間の情報共有体制強化、住民への健康・安全指導・体調急変時の連絡方法周知、医療機関・ボランティアとの連携強化	平成25年台風18号時、同地域で夜間の照明・発電機・医療資源不足、避難所・現場での安否確認遅延、体調急変時の発見遅れや搬送困難が報告されている。	['床上浸水継続による家財・ガス設備・給湯器被害', '下水逆流による衛生被害・健康被害（体調不良者発生）', '生活物資不足・医療資源逼迫による住民の体調不良・不安拡大', '夜間・停電下での事故・体調急変の発見遅延', '避難所過密・受け入れ遅延', '追加搬送希望者の増加による対応遅延']	['冠水長期化による孤立世帯の発生', '感染症・生活環境悪化による体調不良者増加', '支援班・救助班・医療班・救急隊の現場到着遅延', '臨時避難所運用・物資配布の遅延・混乱', '夜間対応困難による住民不安の拡大']
		1-22	500	発災101分後	夜間対応が継続する中、避難所・サテライト避難所の現場では体調不良者・高齢者の健康観察と夜間巡回、資機材（照明・発電機等）のバッテリー残量確認、搬送希望者リストの最新化が求められている。	現場班（避難誘導・保健師）	『避難所・サテライト避難所で体調不良者や高齢者の健康観察、夜間巡回を継続中。新たな急変者は現時点で発生していないが、搬送希望者リストがさらに増加。照明・発電機のバッテリー残量が低下し始めている現場があり、追加手配も必要』との報告が本部に入っている。	夜間で気温が低下傾向。健康相談・応急手当のニーズが高く、医療スタッフ・保健師の現場展開が継続中。搬送希望者の優先順位付けは本部と連携して実施。照明・発電機のバッテリー残量が心配な現場もある。	淀川から約500mの低地で住宅密集地。南側が窪地となっており、水が集まりやすい。都市型排水能力を超えた状態が長期化しやすく、高齢者世帯も多い。	夜間・医療資源逼迫下での現場主導による健康観察・搬送調整・資機材管理体制の徹底訓練。住民の体調急変・安全確保、現場と本部・関係機関の連携強化を狙う。	夜間健康観察・巡回体制の維持、搬送希望者の優先順位付け、照明・発電機等の資機材管理・追加手配、現場と本部・関係機関の迅速な情報共有。現場リーダーの判断・調整力がポイント。	現場班による定時の健康観察・夜間巡回、搬送希望者リストの本部共有と優先順位付け、照明・発電機のバッテリー点検・追加手配、急変時の応急対応準備、住民への健康・安全指導、現場と本部・関係機関の情報共有体制強化。	医療スタッフ・資機材の不足、夜間・停電下での健康観察・応急対応の困難、搬送希望者の増加による調整遅延、現場と本部・関係機関間の情報伝達遅延、住民不安・混乱拡大、体調急変や事故への即応困難	道路は膝程度の冠水継続、住宅内は床上10cm以上の浸水、下水逆流・悪臭あり、停電も一部継続	床上浸水長期化・下水逆流・健康被害拡大・避難所過密・夜間対応・医療資源逼迫・追加搬送要請	床上浸水と下水逆流・悪臭が継続。夜間に入り体調不良者や高齢者の搬送希望がさらに増加。避難所・サテライト避難所ともに満員で、医療スタッフ・医薬品・照明機器の不足が深刻化。現場班・本部間の調整が逼迫し、夜間の安全確保と迅速な応急対応が課題となっている。	医療スタッフ・医薬品・照明機器の事前備蓄・迅速搬送、夜間巡回班の配置強化、要配慮者・高齢者見守り体制の徹底、現場・本部・避難所間の情報共有体制強化、住民への健康・安全指導・体調急変時の連絡方法周知、医療機関・ボランティアとの連携強化	平成25年台風18号時、同地域で夜間の照明・発電機・医療資源不足、避難所・現場での安否確認遅延、体調急変時の発見遅れや搬送困難が報告されている。	['床上浸水継続による家財・ガス設備・給湯器被害', '下水逆流による衛生被害・健康被害（体調不良者発生）', '生活物資不足・医療資源逼迫による住民の体調不良・不安拡大', '夜間・停電下での事故・体調急変の発見遅延', '避難所過密・受け入れ遅延', '追加搬送希望者の増加による対応遅延']	['冠水長期化による孤立世帯の発生', '感染症・生活環境悪化による体調不良者増加', '支援班・救助班・医療班・救急隊の現場到着遅延', '臨時避難所運用・物資配布の遅延・混乱', '夜間対応困難による住民不安の拡大']
		1-23	500	発災106分後	夜間対応が続く中、避難所・サテライト避難所の現場で体調不良者・高齢者の健康観察・夜間巡回・応急手当が継続されている。バッテリー交換・追加搬入の遅延で一部現場の照明・発電機が停止し、現場での安全確保や応急対応に支障が出始めている。	現場班（避難誘導・医療・保健師）	『避難所・サテライト避難所で体調不良者や高齢者の健康観察・夜間巡回を継続中。新たな急変者は発生していないが、照明・発電機のバッテリー切れで一部現場が暗闇となり、応急手当や巡回に支障が出ている。追加搬入は渋滞・冠水で遅延中』との報告。	照明・発電機の追加搬入は本部で調整中だが、道路冠水・渋滞で到着が遅延。医療スタッフ・保健師は手持ちのライトや携帯照明で対応中。夜間の気温低下が続き、住民の健康不安が高まっている。	淀川から約500mの低地で住宅密集地。南側が窪地で水が集まりやすく、都市型排水能力を超えた状態が長期化しやすい。高齢者世帯も多い。	夜間・医療資源逼迫下での資機材不足時の現場対応力・情報共有・応急体制維持の訓練。現場リーダーの判断力・本部との連携・住民安全確保を強化する。	照明・発電機など資機材の管理・追加手配、暗闇下での応急体制維持、現場と本部・関係機関の迅速な情報共有、住民の安全・健康管理。現場判断と資機材運用の工夫がポイント。	現場班による照明・発電機のバッテリー点検・手持ち資機材の活用、住民・体調不良者の健康観察・夜間巡回の継続、暗所での安全確保策（誘導灯・携帯照明等）の工夫、追加資機材到着までの応急対応、現場と本部・関係機関の情報共有体制強化。	照明・発電機のバッテリー切れによる夜間対応困難、暗闇下での健康観察・応急手当の遅延、住民不安・混乱拡大、搬送希望者の増加への即応困難、現場と本部間の情報伝達遅延	道路は膝程度の冠水継続、住宅内は床上10cm以上の浸水、下水逆流・悪臭あり、停電も一部継続	床上浸水長期化・下水逆流・健康被害拡大・避難所過密・夜間対応・医療資源逼迫・資機材不足	床上浸水と下水逆流・悪臭が継続。夜間に入り体調不良者や高齢者の健康観察・夜間巡回が続く中、照明・発電機のバッテリー切れで一部現場が暗闇となり、応急手当や安全確保に支障が出ている。住民の不安や健康リスクが高まっている。	照明・発電機等の資機材管理・追加手配、手持ちライトや誘導灯の応急活用、夜間巡回・健康観察体制の強化、情報共有体制の強化、住民への安全指導と体調急変時の連絡方法周知	平成25年台風18号時、同地域で夜間の照明・発電機不足、避難所・現場での安否確認遅延、体調急変時の発見遅れが報告されている。	['床上浸水継続による家財・ガス設備・給湯器被害', '下水逆流による衛生被害・健康被害（体調不良者発生）', '生活物資不足・医療資源逼迫による住民の体調不良・不安拡大', '夜間・停電下での事故・体調急変の発見遅延', '避難所過密・受け入れ遅延', '照明・発電機バッテリー切れによる夜間対応困難', '追加搬送希望者の増加による対応遅延']	['冠水長期化による孤立世帯の発生', '感染症・生活環境悪化による体調不良者増加', '支援班・救助班・医療班・救急隊の現場到着遅延', '臨時避難所運用・物資配布の遅延・混乱', '夜間対応困難による住民不安の拡大']
		1-24	500	発災113分後	夜間対応が続く中、避難所・サテライト避難所の一部で照明・発電機のバッテリー切れが発生し始め、現場班は手持ちライトや誘導灯を使った応急照明で健康観察・夜間巡回・見守りを継続。住民の転倒・事故リスクが高まっている。	現場班（避難誘導・保健師）	『避難所・サテライト避難所の一部で照明・発電機のバッテリーが切れ、手持ちライトや誘導灯で夜間巡回・健康観察を継続中。暗闇の中で住民の転倒や体調急変リスクが高まっている。追加資機材はまだ到着していない』との現場班からの報告が本部に入った。	現場は夜間の冷え込みが続き、健康相談や応急手当のニーズが高い。住民の不安や安全確保への懸念がさらに高まっており、追加の照明・発電機は本部で手配中だが道路冠水で搬入が遅れている。	淀川から約500mの低地で住宅密集地。南側が窪地となっており、水が集まりやすい。都市型排水能力を超えた状態が長期化しやすく、高齢者世帯も多い。夜間は特に安全管理が課題。	夜間・資機材不足下での応急対応力・現場判断力・住民安全確保・本部連携の実践訓練。	資機材不足時の応急照明・誘導灯活用、夜間巡回・健康観察・住民安全指導、現場と本部間の情報共有・追加要請、住民不安・転倒リスク管理。	手持ちライト・誘導灯を活用した夜間巡回・健康観察、住民への夜間移動制限・転倒防止策の徹底、追加資機材到着までの応急体制維持、本部への状況報告・追加要請、住民への安全・健康指導。	照明・発電機不足による夜間対応困難、暗闇下での健康観察・応急手当の遅延、住民の転倒・事故・不安拡大、追加資機材搬入遅延による対応力低下	道路は膝程度の冠水が継続、住宅内は床上10cm以上の浸水、下水逆流・悪臭あり、停電も一部継続	床上浸水長期化・下水逆流・健康被害拡大・避難所過密・夜間対応・資機材不足	床上浸水と下水逆流・悪臭が継続。夜間に入り照明・発電機のバッテリー切れが発生し、手持ち資機材による応急照明で夜間巡回・健康観察を継続。住民の転倒や体調急変リスクが高まっている。	照明・発電機等の資機材管理・追加手配、手持ちライトや誘導灯の応急活用、夜間巡回・健康観察体制の強化、住民への安全指導・夜間移動制限・体調急変時の連絡方法周知、情報共有体制の強化	平成25年台風18号時、同地域で夜間の照明・発電機不足、避難所・現場での安否確認遅延、体調急変時の発見遅れが報告されている。	['床上浸水継続による家財・ガス設備・給湯器被害', '下水逆流による衛生被害・健康被害（体調不良者発生）', '生活物資不足・医療資源逼迫による住民の体調不良・不安拡大', '夜間・停電下での事故・体調急変の発見遅延', '避難所過密・受け入れ遅延', '追加搬送希望者の増加による対応遅延', '照明・発電機バッテリー切れによる夜間対応困難']	['冠水長期化による孤立世帯の発生', '感染症・生活環境悪化による体調不良者増加', '支援班・救助班・医療班・救急隊の現場到着遅延', '臨時避難所運用・物資配布の遅延・混乱', '夜間対応困難による住民不安の拡大']
		1-25	500	発災116分後	夜間対応が続く中、避難所・サテライト避難所の一部で照明・発電機のバッテリー切れが長引き、手持ちライトや誘導灯等で夜間巡回・健康観察・見守りを最低限継続。住民の転倒・事故防止や健康不安への声かけ、夜間移動制限の徹底が現場班で強化されている。	現場班（避難誘導・保健師）	『避難所・サテライト避難所の一部で照明・発電機のバッテリー切れが続き、手持ちのライトや誘導灯を使って夜間巡回・健康観察・見守りを継続中。住民の転倒や体調急変リスクが高まっているため、夜間移動制限や安全指導を強化している』との現場班からの本部への報告。	手持ちの懐中電灯や携帯照明を最大限活用中。追加資機材の到着は依然として遅れている。夜間の冷え込みが続き、健康相談・応急手当のニーズが高い。転倒事故や体調急変時の連絡方法は現場で再周知済み。	淀川から約500mの低地で住宅密集地。南側が窪地となっており、水が集まりやすい。都市型排水能力を超えた状態が長期化しやすく、高齢者世帯も多い。夜間は特に安全管理が課題。	資機材不足・夜間下での現場主導による応急対応、住民安全確保、情報共有・工夫力の強化訓練。現場リーダーの判断力・連携力、住民の安全対策徹底を狙う。	照明・発電機不足時の現場運用の工夫、暗所での健康観察・応急手当継続、住民転倒事故等のリスク管理、現場と本部・関係機関の情報共有と追加資機材要請の徹底。	現場班による手持ち照明・誘導灯の最大活用、住民の夜間移動制限や転倒防止策の徹底、健康観察・応急手当の継続、本部への追加資機材要請・状況報告、住民への安全指導・不安解消の声かけ。	資機材不足による応急対応力の低下、暗闇下での転倒事故や健康観察の遅延、住民の不安・混乱拡大、追加資機材搬入の遅延、現場と本部間の情報伝達遅延	道路は膝程度の冠水が継続、住宅内は床上10cm以上の浸水、下水逆流・悪臭あり、停電も一部継続	床上浸水長期化・下水逆流・健康被害拡大・避難所過密・夜間対応・資機材不足	床上浸水と下水逆流・悪臭が継続。夜間に入り照明・発電機のバッテリー切れが発生し、手持ち資機材による応急照明で夜間巡回・健康観察を継続。住民の転倒や体調急変リスクが高まっている。	照明・発電機等の資機材管理・追加手配、手持ちライトや誘導灯の応急活用、夜間巡回・健康観察体制の強化、住民への安全指導・夜間移動制限・体調急変時の連絡方法周知、情報共有体制の強化	平成25年台風18号時、同地域で夜間の照明・発電機不足、避難所・現場での安否確認遅延、体調急変時の発見遅れが報告されている。	['床上浸水継続による家財・ガス設備・給湯器被害', '下水逆流による衛生被害・健康被害（体調不良者発生）', '生活物資不足・医療資源逼迫による住民の体調不良・不安拡大', '夜間・停電下での事故・体調急変の発見遅延', '避難所過密・受け入れ遅延', '追加搬送希望者の増加による対応遅延', '照明・発電機バッテリー切れによる夜間対応困難']	['冠水長期化による孤立世帯の発生', '感染症・生活環境悪化による体調不良者増加', '支援班・救助班・医療班・救急隊の現場到着遅延', '臨時避難所運用・物資配布の遅延・混乱', '夜間対応困難による住民不安の拡大']
		1-26	500	発災124分後	照明・発電機のバッテリー切れが続く中、手持ちライトや誘導灯のみで夜間巡回・健康観察・住民見守りを継続。住民の転倒や体調急変リスクが高まり、現場では夜間移動制限の再徹底と応急手当マニュアルの再確認が実施されている。	現場班（避難誘導・保健師）	『照明・発電機のバッテリー切れが続き、現場では手持ちライトや誘導灯のみで夜間巡回・健康観察・住民見守りを継続中。住民の一部からは暗闇や寒さへの不安、転倒や体調急変のリスクについての相談が増えている。追加資機材は依然到着していない』との現場班からの報告。	夜間の冷え込みが続き、健康相談や応急手当のニーズが高い。転倒事故や体調急変時の連絡方法は現場で再周知済み。追加照明・発電機は本部で手配中だが道路冠水で搬入が遅延。	淀川から約500mの低地で住宅密集地。南側が窪地となっており、水が集まりやすい。都市型排水能力を超えた状態が長期化しやすく、高齢者世帯も多い。夜間は特に安全管理が課題。	資機材不足・夜間下での現場主導による応急対応、住民安全確保、情報共有・工夫力の強化訓練。現場リーダーの判断力・連携力、住民の安全対策徹底を狙う。	資機材不足時の応急照明・誘導灯活用、夜間巡回・健康観察・住民安全指導、現場と本部・関係機関の情報共有・追加要請、住民不安・転倒リスク管理。	現場班による手持ち照明・誘導灯の最大活用、住民の夜間移動制限や転倒防止策の徹底、健康観察・応急手当の継続、本部への追加資機材要請・状況報告、住民への安全指導・不安解消の声かけ。	資機材不足による応急対応力の低下、暗闇下での転倒事故や健康観察の遅延、住民の不安・混乱拡大、追加資機材搬入の遅延、現場と本部間の情報伝達遅延	道路は膝程度の冠水が継続、住宅内は床上10cm以上の浸水、下水逆流・悪臭あり、停電も一部継続	床上浸水長期化・下水逆流・健康被害拡大・避難所過密・夜間対応・資機材不足	床上浸水と下水逆流・悪臭が継続。夜間に入り照明・発電機のバッテリー切れが発生し、手持ち資機材による応急照明で夜間巡回・健康観察・見守りを継続。住民の転倒や体調急変リスクが高まっている。	照明・発電機等の資機材管理・追加手配、手持ちライトや誘導灯の応急活用、夜間巡回・健康観察体制の強化、住民への安全指導・夜間移動制限・体調急変時の連絡方法周知、情報共有体制の強化	平成25年台風18号時、同地域で夜間の照明・発電機不足、避難所・現場での安否確認遅延、体調急変時の発見遅れが報告されている。	['床上浸水継続による家財・ガス設備・給湯器被害', '下水逆流による衛生被害・健康被害（体調不良者発生）', '生活物資不足・医療資源逼迫による住民の体調不良・不安拡大', '夜間・停電下での事故・体調急変の発見遅延', '避難所過密・受け入れ遅延', '追加搬送希望者の増加による対応遅延', '照明・発電機バッテリー切れによる夜間対応困難']	['冠水長期化による孤立世帯の発生', '感染症・生活環境悪化による体調不良者増加', '支援班・救助班・医療班・救急隊の現場到着遅延', '臨時避難所運用・物資配布の遅延・混乱', '夜間対応困難による住民不安の拡大']
		1-27	500	発災129分後	追加照明・発電機の搬入が依然として遅延し、避難所・サテライト避難所では手持ちライトや誘導灯のみで夜間巡回・健康観察・住民見守りを継続。住民の転倒や体調急変リスクがさらに高まっているため、現場では夜間移動制限や応急手当マニュアルの再確認、安全指導の強化が続行されている。	現場班（避難誘導・保健師）	『照明・発電機のバッテリー切れが続いており、現場では手持ちライトや誘導灯のみで夜間巡回・健康観察・住民見守りを継続中。住民の一部からは暗闇や寒さへの不安、転倒や体調急変のリスクについての相談が増えている。夜間移動制限や転倒防止策の再周知、応急手当マニュアルの再確認を現場で実施中。追加資機材は依然到着していない』との現場班からの報告。	夜間の冷え込みが続き、健康相談や応急手当のニーズが高い。転倒事故や体調急変時の連絡方法は現場で再周知済み。住民への声かけや見守り体制を強化しているが、追加照明・発電機は本部で手配中も道路冠水で搬入が遅延中。	淀川から約500mの低地で住宅密集地。南側が窪地となっており、水が集まりやすい。都市型排水能力を超えた状態が長期化しやすく、高齢者世帯も多い。夜間は特に安全管理が課題。	資機材不足・夜間下での現場主導による応急対応力、住民安全確保、情報共有・現場判断力の強化訓練。現場リーダーの判断・連携力、住民の安全対策徹底、住民不安への対応力向上を狙う。	資機材不足時の応急照明・誘導灯活用、夜間巡回・健康観察・住民安全指導、現場と本部・関係機関の情報共有・追加要請、住民不安・転倒リスク管理、応急手当マニュアルの再徹底。	現場班による手持ち照明・誘導灯の最大活用、住民の夜間移動制限や転倒防止策の徹底、健康観察・応急手当の継続、本部への追加資機材要請・状況報告、住民への安全指導・不安解消の声かけ、応急手当マニュアルの再確認・周知。	資機材不足による応急対応力の低下、暗闇下での転倒事故や健康観察の遅延、住民の不安・混乱拡大、追加資機材搬入の遅延、現場と本部間の情報伝達遅延、体調急変や事故への即応困難	道路は膝程度の冠水が継続、住宅内は床上10cm以上の浸水、下水逆流・悪臭あり、停電も一部継続	床上浸水長期化・下水逆流・健康被害拡大・避難所過密・夜間対応・資機材不足	床上浸水と下水逆流・悪臭が継続。夜間に入り照明・発電機のバッテリー切れが発生し、手持ち資機材による応急照明で夜間巡回・健康観察・見守りを継続。住民の転倒や体調急変リスクが高まっている。住民の不安も増大し、現場対応力の維持が課題となっている。	照明・発電機等の資機材管理・追加手配、手持ちライトや誘導灯の応急活用、夜間巡回・健康観察体制の強化、住民への安全指導・夜間移動制限・体調急変時の連絡方法周知、情報共有体制の強化、応急手当マニュアルの再確認・周知	平成25年台風18号時、同地域で夜間の照明・発電機不足、避難所・現場での安否確認遅延、体調急変時の発見遅れが報告されている。	['床上浸水継続による家財・ガス設備・給湯器被害', '下水逆流による衛生被害・健康被害（体調不良者発生）', '生活物資不足・医療資源逼迫による住民の体調不良・不安拡大', '夜間・停電下での事故・体調急変の発見遅延', '避難所過密・受け入れ遅延', '追加搬送希望者の増加による対応遅延', '照明・発電機バッテリー切れによる夜間対応困難']	['冠水長期化による孤立世帯の発生', '感染症・生活環境悪化による体調不良者増加', '支援班・救助班・医療班・救急隊の現場到着遅延', '臨時避難所運用・物資配布の遅延・混乱', '夜間対応困難による住民不安の拡大']
		1-28	500	発災134分後	照明・発電機のバッテリー切れが続く中、避難所・サテライト避難所では引き続き手持ちライトや誘導灯のみで夜間巡回・健康観察・住民見守りを継続。住民の転倒や体調急変リスクがさらに高まっているため、現場では夜間移動制限と応急手当マニュアルの再徹底、安全指導の強化が続行されている。	現場班（避難誘導・保健師）	『照明・発電機のバッテリー切れが続いており、現場では手持ちライトや誘導灯のみで夜間巡回・健康観察・住民見守りを継続中。住民の一部からは暗闇や寒さへの不安、転倒や体調急変のリスクについての相談が増えている。夜間移動制限や転倒防止策の再周知、応急手当マニュアルの再確認を現場で実施中。追加資機材は依然到着していない』との現場班からの報告。	夜間の冷え込みが続き、健康相談や応急手当のニーズが高い。転倒事故や体調急変時の連絡方法は現場で再周知済み。住民への声かけや見守り体制を強化しているが、追加照明・発電機は本部で手配中も道路冠水で搬入が遅延中。	淀川から約500mの低地で住宅密集地。南側が窪地となっており、水が集まりやすい。都市型排水能力を超えた状態が長期化しやすく、高齢者世帯も多い。夜間は特に安全管理が課題。	資機材不足・夜間下での現場主導による応急対応力、住民安全確保、情報共有・現場判断力の強化訓練。現場リーダーの判断・連携力、住民の安全対策徹底、住民不安への対応力向上を狙う。	資機材不足時の応急照明・誘導灯活用、夜間巡回・健康観察・住民安全指導、現場と本部・関係機関の情報共有・追加要請、住民不安・転倒リスク管理、応急手当マニュアルの再徹底。	現場班による手持ち照明・誘導灯の最大活用、住民の夜間移動制限や転倒防止策の徹底、健康観察・応急手当の継続、本部への追加資機材要請・状況報告、住民への安全指導・不安解消の声かけ、応急手当マニュアルの再確認・周知。	資機材不足による応急対応力の低下、暗闇下での転倒事故や健康観察の遅延、住民の不安・混乱拡大、追加資機材搬入の遅延、現場と本部間の情報伝達遅延、体調急変や事故への即応困難	道路は膝程度の冠水が継続、住宅内は床上10cm以上の浸水、下水逆流・悪臭あり、停電も一部継続	床上浸水長期化・下水逆流・健康被害拡大・避難所過密・夜間対応・資機材不足	床上浸水と下水逆流・悪臭が継続。夜間に入り照明・発電機のバッテリー切れが発生し、手持ち資機材による応急照明で夜間巡回・健康観察・見守りを継続。住民の転倒や体調急変リスクが高まっている。住民の不安も増大し、現場対応力の維持が課題となっている。	照明・発電機等の資機材管理・追加手配、手持ちライトや誘導灯の応急活用、夜間巡回・健康観察体制の強化、住民への安全指導・夜間移動制限・体調急変時の連絡方法周知、情報共有体制の強化、応急手当マニュアルの再確認・周知	平成25年台風18号時、同地域で夜間の照明・発電機不足、避難所・現場での安否確認遅延、体調急変時の発見遅れが報告されている。	['床上浸水継続による家財・ガス設備・給湯器被害', '下水逆流による衛生被害・健康被害（体調不良者発生）', '生活物資不足・医療資源逼迫による住民の体調不良・不安拡大', '夜間・停電下での事故・体調急変の発見遅延', '避難所過密・受け入れ遅延', '追加搬送希望者の増加による対応遅延', '照明・発電機バッテリー切れによる夜間対応困難']	['冠水長期化による孤立世帯の発生', '感染症・生活環境悪化による体調不良者増加', '支援班・救助班・医療班・救急隊の現場到着遅延', '臨時避難所運用・物資配布の遅延・混乱', '夜間対応困難による住民不安の拡大']
		1-29	500	発災139分後	照明・発電機のバッテリー切れが続き、手持ちライトや誘導灯のみで夜間巡回・健康観察・住民見守りを継続。住民の転倒や体調急変リスクが一段と高まり、現場では夜間移動制限と応急手当マニュアルの再徹底、安全指導の強化が続行されている。	現場班（避難誘導・保健師）	『照明・発電機のバッテリー切れが続いており、現場では手持ちライトや誘導灯のみで夜間巡回・健康観察・住民見守りを継続中。住民の一部からは暗闇や寒さへの不安、転倒や体調急変のリスクについての相談が増えている。夜間移動制限や転倒防止策の再周知、応急手当マニュアルの再確認を現場で実施中。追加資機材は依然到着していない』との現場班からの報告。	夜間の冷え込みが続き、健康相談や応急手当のニーズが高い。転倒事故や体調急変時の連絡方法は現場で再周知済み。住民への声かけや見守り体制を強化しているが、追加照明・発電機は本部で手配中も道路冠水で搬入が遅延中。	淀川から約500mの低地で住宅密集地。南側が窪地となっており、水が集まりやすい。都市型排水能力を超えた状態が長期化しやすく、高齢者世帯も多い。夜間は特に安全管理が課題。	資機材不足・夜間下での現場主導による応急対応力、住民安全確保、情報共有・現場判断力の強化訓練。現場リーダーの判断・連携力、住民の安全対策徹底、住民不安への対応力向上を狙う。	資機材不足時の応急照明・誘導灯活用、夜間巡回・健康観察・住民安全指導、現場と本部・関係機関の情報共有・追加要請、住民不安・転倒リスク管理、応急手当マニュアルの再徹底。	現場班による手持ち照明・誘導灯の最大活用、住民の夜間移動制限や転倒防止策の徹底、健康観察・応急手当の継続、本部への追加資機材要請・状況報告、住民への安全指導・不安解消の声かけ、応急手当マニュアルの再確認・周知。	資機材不足による応急対応力の低下、暗闇下での転倒事故や健康観察の遅延、住民の不安・混乱拡大、追加資機材搬入の遅延、現場と本部間の情報伝達遅延、体調急変や事故への即応困難	道路は膝程度の冠水が継続、住宅内は床上10cm以上の浸水、下水逆流・悪臭あり、停電も一部継続	床上浸水長期化・下水逆流・健康被害拡大・避難所過密・夜間対応・資機材不足	床上浸水と下水逆流・悪臭が継続。夜間に入り照明・発電機のバッテリー切れが発生し、手持ち資機材による応急照明で夜間巡回・健康観察・見守りを継続。住民の転倒や体調急変リスクが高まっている。住民の不安も増大し、現場対応力の維持が課題となっている。	照明・発電機等の資機材管理・追加手配、手持ちライトや誘導灯の応急活用、夜間巡回・健康観察体制の強化、住民への安全指導・夜間移動制限・体調急変時の連絡方法周知、情報共有体制の強化、応急手当マニュアルの再確認・周知	平成25年台風18号時、同地域で夜間の照明・発電機不足、避難所・現場での安否確認遅延、体調急変時の発見遅れが報告されている。	['床上浸水継続による家財・ガス設備・給湯器被害', '下水逆流による衛生被害・健康被害（体調不良者発生）', '生活物資不足・医療資源逼迫による住民の体調不良・不安拡大', '夜間・停電下での事故・体調急変の発見遅延', '避難所過密・受け入れ遅延', '追加搬送希望者の増加による対応遅延', '照明・発電機バッテリー切れによる夜間対応困難']	['冠水長期化による孤立世帯の発生', '感染症・生活環境悪化による体調不良者増加', '支援班・救助班・医療班・救急隊の現場到着遅延', '臨時避難所運用・物資配布の遅延・混乱', '夜間対応困難による住民不安の拡大']
		1-30	500	発災142分後	照明・発電機のバッテリー切れが長期化し、避難所・サテライト避難所では引き続き手持ちライトや誘導灯のみで夜間巡回・健康観察・住民見守りを継続。住民の転倒や体調急変リスクが一段と高まり、現場では夜間移動制限と応急手当マニュアルの徹底、安全指導の強化が続行されている。	現場班（避難誘導・保健師）	『照明・発電機のバッテリー切れが継続し、現場では手持ちライトや誘導灯のみで夜間巡回・健康観察・住民見守りを継続中です。住民の一部からは暗闇や寒さへの不安、転倒や体調急変のリスクについての相談が増えています。夜間移動制限や転倒防止策、応急手当マニュアルの再確認を現場で実施中。追加資機材は依然として到着していません』との現場班からの報告。	夜間の冷え込みが続き、健康相談や応急手当のニーズが高い。転倒事故や体調急変時の連絡方法は現場で再周知済み。住民への声かけや見守り体制を強化しているが、追加照明・発電機は本部で手配中も道路冠水で搬入が遅延している。	淀川から約500mの低地で住宅密集地。南側が窪地となっており、水が集まりやすい。都市型排水能力を超えた状態が長期化しやすく、高齢者世帯も多い。夜間は特に安全管理が課題。	資機材不足・夜間下での現場主導による応急対応力・住民安全確保・情報共有・現場判断力の強化訓練。現場リーダーの判断・連携力、住民の安全対策徹底、住民不安への対応力向上を狙う。	資機材不足時の応急照明・誘導灯活用、夜間巡回・健康観察・住民安全指導、現場と本部・関係機関の情報共有・追加要請、住民不安・転倒リスク管理、応急手当マニュアルの再徹底。	現場班による手持ち照明・誘導灯の最大活用、住民の夜間移動制限や転倒防止策の徹底、健康観察・応急手当の継続、本部への追加資機材要請・状況報告、住民への安全指導・不安解消の声かけ、応急手当マニュアルの再確認・周知。	資機材不足による応急対応力の低下、暗闇下での転倒事故や健康観察の遅延、住民の不安・混乱拡大、追加資機材搬入の遅延、現場と本部間の情報伝達遅延、体調急変や事故への即応困難	道路は膝程度の冠水が継続、住宅内は床上10cm以上の浸水、下水逆流・悪臭あり、停電も一部継続	床上浸水長期化・下水逆流・健康被害拡大・避難所過密・夜間対応・資機材不足	床上浸水と下水逆流・悪臭が継続。夜間に入り照明・発電機のバッテリー切れが発生し、手持ち資機材による応急照明で夜間巡回・健康観察・見守りを継続。住民の転倒や体調急変リスクが高まっている。住民の不安も増大し、現場対応力の維持が課題となっている。	照明・発電機等の資機材管理・追加手配、手持ちライトや誘導灯の応急活用、夜間巡回・健康観察体制の強化、住民への安全指導・夜間移動制限・体調急変時の連絡方法周知、情報共有体制の強化、応急手当マニュアルの再確認・周知	平成25年台風18号時、同地域で夜間の照明・発電機不足、避難所・現場での安否確認遅延、体調急変時の発見遅れが報告されている。	['床上浸水継続による家財・ガス設備・給湯器被害', '下水逆流による衛生被害・健康被害（体調不良者発生）', '生活物資不足・医療資源逼迫による住民の体調不良・不安拡大', '夜間・停電下での事故・体調急変の発見遅延', '避難所過密・受け入れ遅延', '追加搬送希望者の増加による対応遅延', '照明・発電機バッテリー切れによる夜間対応困難']	['冠水長期化による孤立世帯の発生', '感染症・生活環境悪化による体調不良者増加', '支援班・救助班・医療班・救急隊の現場到着遅延', '臨時避難所運用・物資配布の遅延・混乱', '夜間対応困難による住民不安の拡大']
		1-31	500	発災147分後	照明・発電機のバッテリー切れが長期化し、引き続き手持ちライトや誘導灯のみで夜間巡回・健康観察・住民見守りを継続。住民の転倒や体調急変リスクが高まり、現場では夜間移動制限と応急手当マニュアルの徹底、安全指導の強化が続行されている。	現場班（避難誘導・保健師）	『照明・発電機のバッテリー切れが継続し、現場では手持ちライトや誘導灯のみで夜間巡回・健康観察・住民見守りを継続中です。住民の一部からは暗闇や寒さへの不安、転倒や体調急変のリスクについての相談が増えています。夜間移動制限や転倒防止策、応急手当マニュアルの再確認を現場で実施中。追加資機材は依然として到着していません』との現場班からの報告。	夜間の冷え込みが続き、健康相談や応急手当のニーズが高い。転倒事故や体調急変時の連絡方法は現場で再周知済み。住民への声かけや見守り体制を強化しているが、追加照明・発電機は本部で手配中も道路冠水で搬入が遅延している。	淀川から約500mの低地で住宅密集地。南側が窪地となっており、水が集まりやすい。都市型排水能力を超えた状態が長期化しやすく、高齢者世帯も多い。夜間は特に安全管理が課題。	資機材不足・夜間下での現場主導による応急対応力・住民安全確保・情報共有・現場判断力の強化訓練。現場リーダーの判断・連携力、住民の安全対策徹底、住民不安への対応力向上を狙う。	資機材不足時の応急照明・誘導灯活用、夜間巡回・健康観察・住民安全指導、現場と本部・関係機関の情報共有・追加要請、住民不安・転倒リスク管理、応急手当マニュアルの再徹底。	現場班による手持ち照明・誘導灯の最大活用、住民の夜間移動制限や転倒防止策の徹底、健康観察・応急手当の継続、本部への追加資機材要請・状況報告、住民への安全指導・不安解消の声かけ、応急手当マニュアルの再確認・周知。	資機材不足による応急対応力の低下、暗闇下での転倒事故や健康観察の遅延、住民の不安・混乱拡大、追加資機材搬入の遅延、現場と本部間の情報伝達遅延、体調急変や事故への即応困難	道路は膝程度の冠水が継続、住宅内は床上10cm以上の浸水、下水逆流・悪臭あり、停電も一部継続	床上浸水長期化・下水逆流・健康被害拡大・避難所過密・夜間対応・資機材不足	床上浸水と下水逆流・悪臭が継続。夜間に入り照明・発電機のバッテリー切れが発生し、手持ち資機材による応急照明で夜間巡回・健康観察・見守りを継続。住民の転倒や体調急変リスクが高まっている。住民の不安も増大し、現場対応力の維持が課題となっている。	照明・発電機等の資機材管理・追加手配、手持ちライトや誘導灯の応急活用、夜間巡回・健康観察体制の強化、住民への安全指導・夜間移動制限・体調急変時の連絡方法周知、情報共有体制の強化、応急手当マニュアルの再確認・周知	平成25年台風18号時、同地域で夜間の照明・発電機不足、避難所・現場での安否確認遅延、体調急変時の発見遅れが報告されている。	['床上浸水継続による家財・ガス設備・給湯器被害', '下水逆流による衛生被害・健康被害（体調不良者発生）', '生活物資不足・医療資源逼迫による住民の体調不良・不安拡大', '夜間・停電下での事故・体調急変の発見遅延', '避難所過密・受け入れ遅延', '追加搬送希望者の増加による対応遅延', '照明・発電機バッテリー切れによる夜間対応困難']	['冠水長期化による孤立世帯の発生', '感染症・生活環境悪化による体調不良者増加', '支援班・救助班・医療班・救急隊の現場到着遅延', '臨時避難所運用・物資配布の遅延・混乱', '夜間対応困難による住民不安の拡大']
		1-32	500	発災154分後	照明・発電機のバッテリー切れが長期化し、手持ちライトや誘導灯のみで夜間巡回・健康観察・住民見守りを継続。住民の転倒や体調急変リスクがさらに高まり、現場では夜間移動制限・応急手当マニュアルの再徹底、安全指導の強化が続行されている。	現場班（避難誘導・保健師）	『照明・発電機のバッテリー切れが続いており、現場では手持ちライトや誘導灯のみで夜間巡回・健康観察・住民見守りを継続中です。住民の一部からは暗闇や寒さへの不安、転倒や体調急変のリスクについての相談が増えています。夜間移動制限や転倒防止策の再周知、応急手当マニュアルの再確認を現場で実施中。追加資機材は依然として到着していません』との現場班からの報告。	夜間の冷え込みが続き、健康相談や応急手当のニーズが高い。転倒事故や体調急変時の連絡方法は現場で再周知済み。住民への声かけや見守り体制を強化しているが、追加照明・発電機は本部で手配中も道路冠水で搬入が遅延している。	淀川から約500mの低地で住宅密集地。南側が窪地となっており、水が集まりやすい。都市型排水能力を超えた状態が長期化しやすく、高齢者世帯も多い。夜間は特に安全管理が課題。	資機材不足・夜間下での現場主導による応急対応力・住民安全確保・情報共有・現場判断力の強化訓練。現場リーダーの判断・連携力、住民の安全対策徹底、住民不安への対応力向上を狙う。	資機材不足時の応急照明・誘導灯活用、夜間巡回・健康観察・住民安全指導、現場と本部・関係機関の情報共有・追加要請、住民不安・転倒リスク管理、応急手当マニュアルの再徹底。	現場班による手持ち照明・誘導灯の最大活用、住民の夜間移動制限や転倒防止策の徹底、健康観察・応急手当の継続、本部への追加資機材要請・状況報告、住民への安全指導・不安解消の声かけ、応急手当マニュアルの再確認・周知。	資機材不足による応急対応力の低下、暗闇下での転倒事故や健康観察の遅延、住民の不安・混乱拡大、追加資機材搬入の遅延、現場と本部間の情報伝達遅延、体調急変や事故への即応困難	道路は膝程度の冠水が継続、住宅内は床上10cm以上の浸水、下水逆流・悪臭あり、停電も一部継続	床上浸水長期化・下水逆流・健康被害拡大・避難所過密・夜間対応・資機材不足	床上浸水と下水逆流・悪臭が継続。夜間に入り照明・発電機のバッテリー切れが発生し、手持ち資機材による応急照明で夜間巡回・健康観察・見守りを継続。住民の転倒や体調急変リスクが高まっている。住民の不安も増大し、現場対応力の維持が課題となっている。	照明・発電機等の資機材管理・追加手配、手持ちライトや誘導灯の応急活用、夜間巡回・健康観察体制の強化、住民への安全指導・夜間移動制限・体調急変時の連絡方法周知、情報共有体制の強化、応急手当マニュアルの再確認・周知	平成25年台風18号時、同地域で夜間の照明・発電機不足、避難所・現場での安否確認遅延、体調急変時の発見遅れが報告されている。	['床上浸水継続による家財・ガス設備・給湯器被害', '下水逆流による衛生被害・健康被害（体調不良者発生）', '生活物資不足・医療資源逼迫による住民の体調不良・不安拡大', '夜間・停電下での事故・体調急変の発見遅延', '避難所過密・受け入れ遅延', '追加搬送希望者の増加による対応遅延', '照明・発電機バッテリー切れによる夜間対応困難']	['冠水長期化による孤立世帯の発生', '感染症・生活環境悪化による体調不良者増加', '支援班・救助班・医療班・救急隊の現場到着遅延', '臨時避難所運用・物資配布の遅延・混乱', '夜間対応困難による住民不安の拡大']
		1-33	500	発災158分後	照明・発電機のバッテリー切れが続き、手持ちライトや誘導灯のみで夜間巡回・健康観察・住民見守りを続行。住民の転倒や体調急変リスクが非常に高まっており、現場では夜間移動制限・応急手当マニュアルの再徹底、安全指導の強化が続いている。	現場班（避難誘導・保健師）	『照明・発電機のバッテリー切れが継続し、現場では手持ちライトや誘導灯のみで夜間巡回・健康観察・住民見守りを続けています。住民の一部からは暗闇・寒さへの不安、転倒や体調急変のリスク相談が続出。夜間移動制限や転倒防止策、応急手当マニュアルの再確認・再周知を現場で強化中。追加資機材は依然未到着です』との現場班からの報告。	夜間の冷え込みが続き、健康相談や応急手当ニーズが高い。転倒事故や体調急変時の連絡方法は現場で再周知済み。住民への声かけ・見守り体制を強化しているが、追加照明・発電機は本部で手配中も道路冠水で搬入が遅延している。	淀川から約500mの低地で住宅密集地。南側が窪地となっており、水が集まりやすい。都市型排水能力を超えた状態が長期化しやすく、高齢者世帯も多い。夜間は特に安全管理が課題。	資機材不足・夜間下での現場主導による応急対応力・住民安全確保・情報共有・現場判断力の強化訓練。現場リーダーの判断・連携力、住民の安全対策徹底、住民不安への対応力向上を狙う。	資機材不足時の応急照明・誘導灯活用、夜間巡回・健康観察・住民安全指導、現場と本部・関係機関の情報共有・追加要請、住民不安・転倒リスク管理、応急手当マニュアルの再徹底。	現場班による手持ち照明・誘導灯の最大活用、住民の夜間移動制限や転倒防止策の徹底、健康観察・応急手当の継続、本部への追加資機材要請・状況報告、住民への安全指導・不安解消の声かけ、応急手当マニュアルの再確認・周知。	資機材不足による応急対応力の低下、暗闇下での転倒事故や健康観察の遅延、住民の不安・混乱拡大、追加資機材搬入の遅延、現場と本部間の情報伝達遅延、体調急変や事故への即応困難	道路は膝程度の冠水が継続、住宅内は床上10cm以上の浸水、下水逆流・悪臭も継続中	床上浸水長期化・下水逆流・健康被害拡大・避難所過密・夜間対応・資機材不足	床上浸水と下水逆流・悪臭が継続。夜間に入り照明・発電機のバッテリー切れが発生し、手持ち資機材による応急照明で夜間巡回・健康観察・見守りを継続。住民の転倒や体調急変リスクが高まっている。住民の不安も増大し、現場対応力の維持が課題となっている。	照明・発電機等の資機材管理・追加手配、手持ちライトや誘導灯の応急活用、夜間巡回・健康観察体制の強化、住民への安全指導・夜間移動制限・体調急変時の連絡方法周知、情報共有体制の強化、応急手当マニュアルの再確認・周知	平成25年台風18号時、同地域で夜間の照明・発電機不足、避難所・現場での安否確認遅延、体調急変時の発見遅れが報告されている。	['床上浸水継続による家財・ガス設備・給湯器被害', '下水逆流による衛生被害・健康被害（体調不良者発生）', '生活物資不足・医療資源逼迫による住民の体調不良・不安拡大', '夜間・停電下での事故・体調急変の発見遅延', '避難所過密・受け入れ遅延', '追加搬送希望者の増加による対応遅延', '照明・発電機バッテリー切れによる夜間対応困難']	['冠水長期化による孤立世帯の発生', '感染症・生活環境悪化による体調不良者増加', '支援班・救助班・医療班・救急隊の現場到着遅延', '臨時避難所運用・物資配布の遅延・混乱', '夜間対応困難による住民不安の拡大']
		1-34	500	発災165分後	照明・発電機のバッテリー切れが続き、避難所・サテライト避難所では手持ちライトや誘導灯のみで夜間巡回・健康観察・住民見守りを継続。住民の転倒や体調急変リスクが非常に高い状態が続いており、現場では夜間移動制限・応急手当マニュアルの再徹底、安全指導の強化が継続中。	現場班（避難誘導・保健師）	『照明・発電機のバッテリー切れが続いており、現場では手持ちライトや誘導灯のみで夜間巡回・健康観察・住民見守りを続けています。住民の一部からは暗闇・寒さへの不安、転倒や体調急変のリスク相談が続出。夜間移動制限や転倒防止策、応急手当マニュアルの再確認・再周知を現場で強化中。追加資機材は依然未到着です』との現場班からの報告。	夜間の冷え込みが続き、健康相談や応急手当ニーズが高い。転倒事故や体調急変時の連絡方法は現場で再周知済み。住民への声かけ・見守り体制を強化しているが、追加照明・発電機は本部で手配中も道路冠水で搬入が遅延している。	淀川から約500mの低地で住宅密集地。南側が窪地となっており、水が集まりやすい。都市型排水能力を超えた状態が長期化しやすく、高齢者世帯も多い。夜間は特に安全管理が課題。	資機材不足・夜間下での現場主導による応急対応力・住民安全確保・情報共有・現場判断力の強化訓練。現場リーダーの判断・連携力、住民の安全対策徹底、住民不安への対応力向上を狙う。	資機材不足時の応急照明・誘導灯活用、夜間巡回・健康観察・住民安全指導、現場と本部・関係機関の情報共有・追加要請、住民不安・転倒リスク管理、応急手当マニュアルの再徹底。	現場班による手持ち照明・誘導灯の最大活用、住民の夜間移動制限や転倒防止策の徹底、健康観察・応急手当の継続、本部への追加資機材要請・状況報告、住民への安全指導・不安解消の声かけ、応急手当マニュアルの再確認・周知。	資機材不足による応急対応力の低下、暗闇下での転倒事故や健康観察の遅延、住民の不安・混乱拡大、追加資機材搬入の遅延、現場と本部間の情報伝達遅延、体調急変や事故への即応困難	道路は膝程度の冠水継続、住宅内は床上10cm以上の浸水、下水逆流・悪臭も継続中	床上浸水長期化・下水逆流・健康被害拡大・避難所過密・夜間対応・資機材不足	床上浸水と下水逆流・悪臭が継続。夜間に入り照明・発電機のバッテリー切れが発生し、手持ち資機材による応急照明で夜間巡回・健康観察・見守りを継続。住民の転倒や体調急変リスクが高まっている。住民の不安も増大し、現場対応力の維持が課題となっている。	照明・発電機等の資機材管理・追加手配、手持ちライトや誘導灯の応急活用、夜間巡回・健康観察体制の強化、住民への安全指導・夜間移動制限・体調急変時の連絡方法周知、情報共有体制の強化、応急手当マニュアルの再確認・周知	平成25年台風18号時、同地域で夜間の照明・発電機不足、避難所・現場での安否確認遅延、体調急変時の発見遅れが報告されている。	['床上浸水継続による家財・ガス設備・給湯器被害', '下水逆流による衛生被害・健康被害（体調不良者発生）', '生活物資不足・医療資源逼迫による住民の体調不良・不安拡大', '夜間・停電下での事故・体調急変の発見遅延', '避難所過密・受け入れ遅延', '追加搬送希望者の増加による対応遅延', '照明・発電機バッテリー切れによる夜間対応困難']	['冠水長期化による孤立世帯の発生', '感染症・生活環境悪化による体調不良者増加', '支援班・救助班・医療班・救急隊の現場到着遅延', '臨時避難所運用・物資配布の遅延・混乱', '夜間対応困難による住民不安の拡大']
		1-35	500	発災169分後	照明・発電機のバッテリー切れが続き、避難所・サテライト避難所では引き続き手持ちライトや誘導灯のみで夜間巡回・健康観察・住民見守りを継続。住民の転倒や体調急変リスクが非常に高い状態が続いており、現場では夜間移動制限・応急手当マニュアルの再徹底、安全指導の強化が続行されている。	現場班（避難誘導・保健師）	『照明・発電機のバッテリー切れが継続し、現場では手持ちライトや誘導灯のみで夜間巡回・健康観察・住民見守りを続けています。住民の一部からは暗闇や寒さへの不安、転倒や体調急変のリスクについての相談が続出。夜間移動制限や転倒防止策、応急手当マニュアルの再確認・再周知を現場で強化中。追加資機材は依然未到着です』との現場班からの報告。	夜間の冷え込みが続き、健康相談や応急手当ニーズが高い。転倒事故や体調急変時の連絡方法は現場で再周知済み。住民への声かけ・見守り体制を強化しているが、追加照明・発電機は本部で手配中も道路冠水で搬入が遅延している。	淀川から約500mの低地で住宅密集地。南側が窪地となっており、水が集まりやすい。都市型排水能力を超えた状態が長期化しやすく、高齢者世帯も多い。夜間は特に安全管理が課題。	資機材不足・夜間下での現場主導による応急対応力・住民安全確保・情報共有・現場判断力の強化訓練。現場リーダーの判断・連携力、住民の安全対策徹底、住民不安への対応力向上を狙う。	資機材不足時の応急照明・誘導灯活用、夜間巡回・健康観察・住民安全指導、現場と本部・関係機関の情報共有・追加要請、住民不安・転倒リスク管理、応急手当マニュアルの再徹底。	現場班による手持ち照明・誘導灯の最大活用、住民の夜間移動制限や転倒防止策の徹底、健康観察・応急手当の継続、本部への追加資機材要請・状況報告、住民への安全指導・不安解消の声かけ、応急手当マニュアルの再確認・周知。	資機材不足による応急対応力の低下、暗闇下での転倒事故や健康観察の遅延、住民の不安・混乱拡大、追加資機材搬入の遅延、現場と本部間の情報伝達遅延、体調急変や事故への即応困難	道路は膝程度の冠水継続、住宅内は床上10cm以上の浸水、下水逆流・悪臭も継続中	床上浸水長期化・下水逆流・健康被害拡大・避難所過密・夜間対応・資機材不足	床上浸水と下水逆流・悪臭が継続。夜間に入り照明・発電機のバッテリー切れが発生し、手持ち資機材による応急照明で夜間巡回・健康観察・見守りを継続。住民の転倒や体調急変リスクが高まっている。住民の不安も増大し、現場対応力の維持が課題となっている。	照明・発電機等の資機材管理・追加手配、手持ちライトや誘導灯の応急活用、夜間巡回・健康観察体制の強化、住民への安全指導・夜間移動制限・体調急変時の連絡方法周知、情報共有体制の強化、応急手当マニュアルの再確認・周知	平成25年台風18号時、同地域で夜間の照明・発電機不足、避難所・現場での安否確認遅延、体調急変時の発見遅れが報告されている。	['床上浸水継続による家財・ガス設備・給湯器被害', '下水逆流による衛生被害・健康被害（体調不良者発生）', '生活物資不足・医療資源逼迫による住民の体調不良・不安拡大', '夜間・停電下での事故・体調急変の発見遅延', '避難所過密・受け入れ遅延', '追加搬送希望者の増加による対応遅延', '照明・発電機バッテリー切れによる夜間対応困難']	['冠水長期化による孤立世帯の発生', '感染症・生活環境悪化による体調不良者増加', '支援班・救助班・医療班・救急隊の現場到着遅延', '臨時避難所運用・物資配布の遅延・混乱', '夜間対応困難による住民不安の拡大']
		1-36	500	発災175分後	照明・発電機のバッテリー切れが続き、手持ちライトや誘導灯のみで夜間巡回・健康観察・住民見守りを継続。住民の転倒や体調急変リスクが非常に高い状態が続いており、現場では夜間移動制限・応急手当マニュアルの再徹底、安全指導の強化が継続中。	現場班（避難誘導・保健師）	『照明・発電機のバッテリー切れが続いており、現場では手持ちライトや誘導灯のみで夜間巡回・健康観察・住民見守りを続けています。住民からは暗闇や寒さへの不安、転倒や体調急変リスクの相談が続出。夜間移動制限や転倒防止策、応急手当マニュアルの再確認・再周知を現場で強化中。追加資機材は依然未到着です』との現場班からの報告。	夜間の冷え込みが続き、健康相談や応急手当ニーズが高い。転倒事故や体調急変時の連絡方法は現場で再周知済み。住民への声かけ・見守り体制を強化しているが、追加照明・発電機は本部で手配中も道路冠水で搬入が遅延している。	淀川から約500mの低地で住宅密集地。南側が窪地となっており、水が集まりやすい。都市型排水能力を超えた状態が長期化しやすく、高齢者世帯も多い。夜間は特に安全管理が課題。	資機材不足・夜間下での現場主導による応急対応力・住民安全確保・情報共有・現場判断力の強化訓練。現場リーダーの判断・連携力、住民の安全対策徹底、住民不安への対応力向上を狙う。	資機材不足時の応急照明・誘導灯活用、夜間巡回・健康観察・住民安全指導、現場と本部・関係機関の情報共有・追加要請、住民不安・転倒リスク管理、応急手当マニュアルの再徹底。	現場班による手持ち照明・誘導灯の最大活用、住民の夜間移動制限や転倒防止策の徹底、健康観察・応急手当の継続、本部への追加資機材要請・状況報告、住民への安全指導・不安解消の声かけ、応急手当マニュアルの再確認・周知。	資機材不足による応急対応力の低下、暗闇下での転倒事故や健康観察の遅延、住民の不安・混乱拡大、追加資機材搬入の遅延、現場と本部間の情報伝達遅延、体調急変や事故への即応困難	道路は膝程度の冠水継続、住宅内は床上10cm以上の浸水、下水逆流・悪臭も継続中	床上浸水長期化・下水逆流・健康被害拡大・避難所過密・夜間対応・資機材不足	床上浸水と下水逆流・悪臭が継続。夜間に入り照明・発電機のバッテリー切れが発生し、手持ち資機材による応急照明で夜間巡回・健康観察・見守りを継続。住民の転倒や体調急変リスクが高まっている。住民の不安も増大し、現場対応力の維持が課題となっている。	照明・発電機等の資機材管理・追加手配、手持ちライトや誘導灯の応急活用、夜間巡回・健康観察体制の強化、住民への安全指導・夜間移動制限・体調急変時の連絡方法周知、情報共有体制の強化、応急手当マニュアルの再確認・周知	平成25年台風18号時、同地域で夜間の照明・発電機不足、避難所・現場での安否確認遅延、体調急変時の発見遅れが報告されている。	['床上浸水継続による家財・ガス設備・給湯器被害', '下水逆流による衛生被害・健康被害（体調不良者発生）', '生活物資不足・医療資源逼迫による住民の体調不良・不安拡大', '夜間・停電下での事故・体調急変の発見遅延', '避難所過密・受け入れ遅延', '追加搬送希望者の増加による対応遅延', '照明・発電機バッテリー切れによる夜間対応困難']	['冠水長期化による孤立世帯の発生', '感染症・生活環境悪化による体調不良者増加', '支援班・救助班・医療班・救急隊の現場到着遅延', '臨時避難所運用・物資配布の遅延・混乱', '夜間対応困難による住民不安の拡大']
		1-37	500	発災179分後	照明・発電機のバッテリー切れが長期化し、手持ちライトや誘導灯のみで夜間巡回・健康観察・住民見守りを継続。住民の転倒や体調急変リスクが非常に高い状態が続いており、現場では夜間移動制限・応急手当マニュアルの再徹底、安全指導の強化が続行されている。	現場班（避難誘導・保健師）	『照明・発電機のバッテリー切れが続いており、現場では手持ちライトや誘導灯のみで夜間巡回・健康観察・住民見守りを続けています。住民からは暗闇・寒さへの不安、転倒や体調急変リスクの相談が続出。夜間移動制限や転倒防止策、応急手当マニュアルの再確認・再周知を現場で強化中。追加資機材は依然未到着です』との現場班からの報告。	夜間の冷え込みが続き、健康相談や応急手当ニーズが高い。転倒事故や体調急変時の連絡方法は現場で再周知済み。住民への声かけ・見守り体制を強化しているが、追加照明・発電機は本部で手配中も道路冠水で搬入が遅延している。	淀川から約500mの低地で住宅密集地。南側が窪地となっており、水が集まりやすい。都市型排水能力を超えた状態が長期化しやすく、高齢者世帯も多い。夜間は特に安全管理が課題。	資機材不足・夜間下での現場主導による応急対応力・住民安全確保・情報共有・現場判断力の強化訓練。現場リーダーの判断・連携力、住民の安全対策徹底、住民不安への対応力向上を狙う。	資機材不足時の応急照明・誘導灯活用、夜間巡回・健康観察・住民安全指導、現場と本部・関係機関の情報共有・追加要請、住民不安・転倒リスク管理、応急手当マニュアルの再徹底。	現場班による手持ち照明・誘導灯の最大活用、住民の夜間移動制限や転倒防止策の徹底、健康観察・応急手当の継続、本部への追加資機材要請・状況報告、住民への安全指導・不安解消の声かけ、応急手当マニュアルの再確認・周知。	資機材不足による応急対応力の低下、暗闇下での転倒事故や健康観察の遅延、住民の不安・混乱拡大、追加資機材搬入の遅延、現場と本部間の情報伝達遅延、体調急変や事故への即応困難	道路は膝程度の冠水継続、住宅内は床上10cm以上の浸水、下水逆流・悪臭も継続中	床上浸水長期化・下水逆流・健康被害拡大・避難所過密・夜間対応・資機材不足	床上浸水と下水逆流・悪臭が継続。夜間に入り照明・発電機のバッテリー切れが発生し、手持ち資機材による応急照明で夜間巡回・健康観察・見守りを継続。住民の転倒や体調急変リスクが高まっている。住民の不安も増大し、現場対応力の維持が課題となっている。	照明・発電機等の資機材管理・追加手配、手持ちライトや誘導灯の応急活用、夜間巡回・健康観察体制の強化、住民への安全指導・夜間移動制限・体調急変時の連絡方法周知、情報共有体制の強化、応急手当マニュアルの再確認・周知	平成25年台風18号時、同地域で夜間の照明・発電機不足、避難所・現場での安否確認遅延、体調急変時の発見遅れが報告されている。	['床上浸水継続による家財・ガス設備・給湯器被害', '下水逆流による衛生被害・健康被害（体調不良者発生）', '生活物資不足・医療資源逼迫による住民の体調不良・不安拡大', '夜間・停電下での事故・体調急変の発見遅延', '避難所過密・受け入れ遅延', '追加搬送希望者の増加による対応遅延', '照明・発電機バッテリー切れによる夜間対応困難']	['冠水長期化による孤立世帯の発生', '感染症・生活環境悪化による体調不良者増加', '支援班・救助班・医療班・救急隊の現場到着遅延', '臨時避難所運用・物資配布の遅延・混乱', '夜間対応困難による住民不安の拡大']
		1-38	500	発災181分後	照明・発電機のバッテリー切れが長期化し、手持ちライトや誘導灯のみで夜間巡回・健康観察・住民見守りを続行。住民の転倒や体調急変リスクが非常に高い状態が続き、現場では夜間移動制限・応急手当マニュアルの再徹底、安全指導の強化が継続中。	現場班（避難誘導・保健師）	『照明・発電機のバッテリー切れが継続し、現場では手持ちライトや誘導灯のみで夜間巡回・健康観察・住民見守りを続けています。住民からは暗闇・寒さへの不安、転倒や体調急変リスクの相談が続出。夜間移動制限や転倒防止策、応急手当マニュアルの再確認・再周知を現場で強化中。追加資機材は依然未到着です』との現場班からの報告。	夜間の冷え込みが続き、健康相談や応急手当ニーズが高い。転倒事故や体調急変時の連絡方法は現場で再周知済み。住民への声かけ・見守り体制を強化しているが、追加照明・発電機は本部で手配中も道路冠水で搬入が遅延している。	淀川から約500mの低地で住宅密集地。南側が窪地となっており、水が集まりやすい。都市型排水能力を超えた状態が長期化しやすく、高齢者世帯も多い。夜間は特に安全管理が課題。	資機材不足・夜間下での現場主導による応急対応力・住民安全確保・情報共有・現場判断力の強化訓練。現場リーダーの判断・連携力、住民の安全対策徹底、住民不安への対応力向上を狙う。	資機材不足時の応急照明・誘導灯活用、夜間巡回・健康観察・住民安全指導、現場と本部・関係機関の情報共有・追加要請、住民不安・転倒リスク管理、応急手当マニュアルの再徹底。	現場班による手持ち照明・誘導灯の最大活用、住民の夜間移動制限や転倒防止策の徹底、健康観察・応急手当の継続、本部への追加資機材要請・状況報告、住民への安全指導・不安解消の声かけ、応急手当マニュアルの再確認・周知。	資機材不足による応急対応力の低下、暗闇下での転倒事故や健康観察の遅延、住民の不安・混乱拡大、追加資機材搬入の遅延、現場と本部間の情報伝達遅延、体調急変や事故への即応困難	道路は膝程度の冠水継続、住宅内は床上10cm以上の浸水、下水逆流・悪臭も継続中	床上浸水長期化・下水逆流・健康被害拡大・避難所過密・夜間対応・資機材不足	床上浸水と下水逆流・悪臭が継続。夜間に入り照明・発電機のバッテリー切れが発生し、手持ち資機材による応急照明で夜間巡回・健康観察・見守りを継続。住民の転倒や体調急変リスクが高まっている。住民の不安も増大し、現場対応力の維持が課題となっている。	照明・発電機等の資機材管理・追加手配、手持ちライトや誘導灯の応急活用、夜間巡回・健康観察体制の強化、住民への安全指導・夜間移動制限・体調急変時の連絡方法周知、情報共有体制の強化、応急手当マニュアルの再確認・周知	平成25年台風18号時、同地域で夜間の照明・発電機不足、避難所・現場での安否確認遅延、体調急変時の発見遅れが報告されている。	['床上浸水継続による家財・ガス設備・給湯器被害', '下水逆流による衛生被害・健康被害（体調不良者発生）', '生活物資不足・医療資源逼迫による住民の体調不良・不安拡大', '夜間・停電下での事故・体調急変の発見遅延', '避難所過密・受け入れ遅延', '追加搬送希望者の増加による対応遅延', '照明・発電機バッテリー切れによる夜間対応困難']	['冠水長期化による孤立世帯の発生', '感染症・生活環境悪化による体調不良者増加', '支援班・救助班・医療班・救急隊の現場到着遅延', '臨時避難所運用・物資配布の遅延・混乱', '夜間対応困難による住民不安の拡大']

## Sheet: 枚方市上島町14
評価	備考	シナリオID	(推測)災害の中心からの距離[m]	イベント発生時刻	付与内容	情報源	状況付与内容	補足情報	地形情報や想定想定される被害の特徴	訓練効果・狙い	判断ポイント	期待される対応行動	想定される課題	水位状況	被害の種類	詳細な被害状況	想定される対策	類似の過去事例(あれば記載)	直近のリスク	二次的なリスク
		1-3	800	発災5分後					淀川本流から約800m離れており、周辺は住宅地でやや高台となっている。標高は中心部より高く、広範囲の洪水被害は発生しにくいが、今後の増水状況によっては低地部分で冠水の可能性もある。					現時点で目立った増水や冠水は確認されていない	被害なし	現時点では道路や住宅への浸水・冠水は確認されていない。住民からの被害通報も入っていない。	今後の増水に備えた情報収集と警戒態勢の維持、周辺住民への注意喚起、要配慮者への状況確認。	平成25年台風18号時にも、淀川本流から離れた高台地域では大きな冠水被害は報告されていない。	[]	[]
		1-4	800	発災9分後					淀川本流から約800m離れており、周辺は住宅地でやや高台となっている。標高は中心部より高く、広範囲の洪水被害は発生しにくいが、今後の増水状況によっては低地部分で冠水の可能性もある。					現時点で目立った増水や冠水は確認されていない	被害なし	現時点では道路や住宅への浸水・冠水は確認されていない。住民からの被害通報も入っていない。	今後の増水に備えた情報収集と警戒態勢の維持、周辺住民への注意喚起、要配慮者への状況確認。今後の状況変化に備え、避難所開設準備や土のう配布の体制を確認しておく。	平成25年台風18号時にも、淀川本流から離れた高台地域では大きな冠水被害は報告されていない。	[]	[]
		1-5	800	発災13分後					淀川本流から約800m離れており、周辺は住宅地でやや高台となっている。標高は中心部より高く、広範囲の洪水被害は発生しにくいが、今後の増水状況によっては低地部分で冠水の可能性もある。					現時点で目立った増水や冠水は確認されていない	被害なし	発災13分時点でも道路や住宅への浸水・冠水は確認されていない。住民からの被害通報も入っていない。	今後の増水に備えた情報収集と警戒態勢の維持、周辺住民への注意喚起、要配慮者への状況確認。引き続き避難所開設準備や土のう配布体制を確認しておく。	平成25年台風18号時にも、淀川本流から離れた高台地域では大きな冠水被害は報告されていない。	[]	[]
		1-6	800	発災17分後					淀川本流から約800m離れており、周辺は住宅地でやや高台となっている。標高は中心部より高く、広範囲の洪水被害は発生しにくいが、今後の増水状況によっては低地部分で冠水の可能性もある。					現時点で目立った増水や冠水は確認されていない	被害なし	発災17分時点でも道路や住宅への浸水・冠水は確認されていない。住民からの被害通報も入っていない。	今後の増水に備えた情報収集と警戒態勢の維持、周辺住民への注意喚起、要配慮者への状況確認。引き続き避難所開設準備や土のう配布体制を確認しておく。	平成25年台風18号時にも、淀川本流から離れた高台地域では大きな冠水被害は報告されていない。	[]	[]
		1-7	800	発災21分後					淀川本流から約800m離れており、周辺は住宅地でやや高台となっている。標高は中心部より高く、広範囲の洪水被害は発生しにくい。今後の増水状況によっては、局所的な低地部分で冠水の可能性もあるが、現時点では被害なし。					現時点で目立った増水や冠水は確認されていない	被害なし	発災21分時点でも道路や住宅への浸水・冠水は確認されていない。住民からの被害通報も入っていない。通常通りの生活が維持されている。	今後の増水や下流域の氾濫情報に備えた情報収集と警戒態勢の維持。周辺住民への注意喚起と要配慮者への状況確認を継続する。避難所開設準備や土のう配布体制を再確認しておく。	平成25年台風18号時にも、淀川本流から離れた高台地域では大きな冠水被害は報告されていない。	[]	[]
		1-8	800	発災27分後					淀川本流から約800m離れており、周辺は住宅地でやや高台となっている。標高は中心部より高く、広範囲の洪水被害は発生しにくいが、今後の増水状況によっては低地部分で冠水の可能性もある。					現時点で目立った増水や冠水は確認されていない	被害なし	道路や住宅への浸水・冠水は引き続き確認されていない。住民からの被害通報もなく、通常通りの生活が維持されている。	今後の増水や下流域の氾濫情報に備えた情報収集と警戒態勢の維持。周辺住民への注意喚起と、要配慮者への状況確認を継続。避難所開設準備や土のう配布体制の再確認も行う。	平成25年台風18号時にも、淀川本流から離れた高台地域では大きな冠水被害は報告されていない。	[]	[]
		1-9	800	発災35分後					淀川本流から約800m離れており、周辺は住宅地でやや高台となっている。標高は中心部より高く、広範囲の洪水被害は発生しにくいが、今後の増水状況によっては低地部分で冠水の可能性もある。					現時点で目立った増水や冠水は確認されていない	被害なし	道路や住宅への浸水・冠水は引き続き確認されていない。住民からの被害通報もなく、通常通りの生活が維持されている。	今後の増水や下流域の氾濫情報に備えた情報収集と警戒態勢の維持。周辺住民への注意喚起と、要配慮者への状況確認を継続。避難所開設準備や土のう配布体制の再確認も行う。	平成25年台風18号時にも、淀川本流から離れた高台地域では大きな冠水被害は報告されていない。	[]	[]
		1-10	800	発災40分後					淀川本流から約800m離れており、周辺は住宅地でやや高台となっている。標高は中心部より高く、広範囲の洪水被害は発生しにくいが、今後の増水状況によっては低地部分で冠水の可能性もある。					現時点で目立った増水や冠水は確認されていない	被害なし	道路や住宅への浸水・冠水は引き続き確認されていない。住民からの被害通報もなく、通常通りの生活が維持されている。	今後の増水や下流域の氾濫情報に備えた情報収集と警戒態勢の維持。周辺住民への注意喚起と、要配慮者への状況確認を継続。避難所開設準備や土のう配布体制の再確認も行う。	平成25年台風18号時にも、淀川本流から離れた高台地域では大きな冠水被害は報告されていない。	[]	[]
		1-11	800	発災44分後					淀川本流から約800m離れており、周辺は住宅地でやや高台となっている。標高は災害中心部より高いため、広範囲の洪水被害は発生しにくいが、今後の増水状況によっては局所的な低地部分で冠水の可能性もある。					現時点で目立った増水や冠水は確認されていない	被害なし	発災44分時点でも道路や住宅への浸水・冠水は確認されていない。住民からの被害通報もなく、通常通りの生活が維持されている。	今後の増水や下流域の氾濫情報に備えた情報収集と警戒態勢の維持。周辺住民への注意喚起と、要配慮者への状況確認を継続。避難所開設準備や土のう配布体制の再確認も行う。	平成25年台風18号時にも、淀川本流から離れた高台地域では大きな冠水被害は報告されていない。	[]	[]
		1-12	800	発災49分後					淀川本流から約800m離れており、周辺は住宅地でやや高台となっている。標高は中心部より高く、広範囲の洪水被害は発生しにくいが、今後の増水状況によっては低地部分で冠水の可能性もある。					現時点で目立った増水や冠水は確認されていない	被害なし	発災49分時点でも道路や住宅への浸水・冠水は確認されていない。住民からの被害通報もなく、通常通りの生活が維持されている。	今後の増水や下流域の氾濫情報に備えた情報収集と警戒態勢の維持。周辺住民への注意喚起と、要配慮者への状況確認を継続。避難所開設準備や土のう配布体制の再確認も行う。	平成25年台風18号時にも、淀川本流から離れた高台地域では大きな冠水被害は報告されていない。	[]	[]
		1-13	800	発災51分後					淀川本流から約800m離れており、周辺は住宅地でやや高台となっている。標高は中心部より高く、広範囲の洪水被害は発生しにくいが、今後の増水状況によっては低地部分で冠水の可能性もある。					現時点で目立った増水や冠水は確認されていない	被害なし	発災51分時点でも道路や住宅への浸水・冠水は確認されていない。住民からの被害通報もなく、通常通りの生活が維持されている。	今後の増水や下流域の氾濫情報に備えた情報収集と警戒態勢の維持。周辺住民への注意喚起と、要配慮者への状況確認を継続。避難所開設準備や土のう配布体制の再確認も行う。	平成25年台風18号時にも、淀川本流から離れた高台地域では大きな冠水被害は報告されていない。	[]	[]
		1-14	800	発災56分後					淀川本流から約800m離れており、周辺は住宅地でやや高台となっている。標高は中心部より高く、広範囲の洪水被害は発生しにくいが、今後の増水状況によっては低地部分で冠水の可能性もある。					現時点で目立った増水や冠水は確認されていない	被害なし	発災56分時点でも道路や住宅への浸水・冠水は確認されていない。住民からの被害通報もなく、通常通りの生活が維持されている。	今後の増水や下流域の氾濫情報に備えた情報収集と警戒態勢の維持。周辺住民への注意喚起と、要配慮者への状況確認を継続。避難所開設準備や土のう配布体制の再確認も行う。	平成25年台風18号時にも、淀川本流から離れた高台地域では大きな冠水被害は報告されていない。	[]	[]
		1-15	800	発災62分後					淀川本流から約800m離れており、周辺は住宅地でやや高台となっている。標高は中心部より高く、広範囲の洪水被害は発生しにくいが、今後の増水状況によっては低地部分で冠水の可能性もある。					現時点で目立った増水や冠水は確認されていない	被害なし	発災62分時点でも道路や住宅への浸水・冠水は確認されていない。住民からの被害通報もなく、通常通りの生活が維持されている。	今後の増水や下流域の氾濫情報に備えた情報収集と警戒態勢の維持。周辺住民への注意喚起と、要配慮者への状況確認を継続。避難所開設準備や土のう配布体制の再確認も行う。	平成25年台風18号時にも、淀川本流から離れた高台地域では大きな冠水被害は報告されていない。	[]	[]
		1-16	800	発災69分後					淀川本流から約800m離れており、周辺は住宅地でやや高台となっている。標高は中心部より高く、広範囲の洪水被害は発生しにくいが、今後の増水状況によっては低地部分で冠水の可能性もある。					現時点で目立った増水や冠水は確認されていない	被害なし	発災69分時点でも道路や住宅への浸水・冠水は確認されていない。住民からの被害通報もなく、通常通りの生活が維持されている。	今後の増水や下流域の氾濫情報に備えた情報収集と警戒態勢の維持。周辺住民への注意喚起と、要配慮者への状況確認を継続。避難所開設準備や土のう配布体制の再確認も行う。	平成25年台風18号時にも、淀川本流から離れた高台地域では大きな冠水被害は報告されていない。	[]	[]
		1-17	800	発災74分後					淀川本流から約800m離れており、周辺は住宅地でやや高台となっている。標高は中心部より高く、広範囲の洪水被害は発生しにくいが、今後の増水状況によっては低地部分で冠水の可能性もある。					現時点で目立った増水や冠水は確認されていない	被害なし	発災74分時点でも道路や住宅への浸水・冠水は確認されていない。住民からの被害通報もなく、通常通りの生活が維持されている。	今後の増水や下流域の氾濫情報に備えた情報収集と警戒態勢の維持。周辺住民への注意喚起と、要配慮者への状況確認を継続。避難所開設準備や土のう配布体制の再確認も行う。	平成25年台風18号時にも、淀川本流から離れた高台地域では大きな冠水被害は報告されていない。	[]	[]
		1-18	800	発災79分後					淀川本流から約800m離れており、周辺は住宅地でやや高台となっている。標高は中心部より高く、広範囲の洪水被害は発生しにくいが、今後の増水状況によっては低地部分で冠水の可能性もある。					現時点で目立った増水や冠水は確認されていない	被害なし	発災79分時点でも道路や住宅への浸水・冠水は確認されていない。住民からの被害通報もなく、通常通りの生活が維持されている。	今後の増水や下流域の氾濫情報に備えた情報収集と警戒態勢の維持。周辺住民への注意喚起と、要配慮者への状況確認を継続。避難所開設準備や土のう配布体制の再確認も行う。	平成25年台風18号時にも、淀川本流から離れた高台地域では大きな冠水被害は報告されていない。	[]	[]
		1-19	800	発災82分後					淀川本流から約800m離れており、周辺は住宅地でやや高台となっている。標高は中心部より高く、広範囲の洪水被害は発生しにくい。今後の増水状況によっては局所的な低地部分で冠水の可能性もあるが、現段階では顕著な被害は出ていない。					現時点で目立った増水や冠水は確認されていない	被害なし	発災82分時点でも道路や住宅への浸水・冠水は確認されていない。住民からの被害通報もなく、通常通りの生活が維持されている。	今後の増水や下流域の氾濫情報に備えた情報収集と警戒態勢の維持。周辺住民への注意喚起と、要配慮者への状況確認を継続。避難所開設準備や土のう配布体制の再確認も行う。	平成25年台風18号時にも、淀川本流から離れた高台地域では大きな冠水被害は報告されていない。	[]	[]
		1-20	800	発災86分後					淀川本流から約800m離れており、周辺は住宅地でやや高台となっている。標高は中心部より高く、広範囲の洪水被害は発生しにくい。局所的な低地部分で一時的な冠水の可能性はあるが、現段階では顕著な被害は出ていない。					現時点で目立った増水や冠水は確認されていない	被害なし	道路や住宅への浸水・冠水は引き続き確認されていない。住民からの被害通報もなく、通常通りの生活が維持されている。	今後の増水や下流域の氾濫情報に備えた情報収集と警戒態勢の維持。周辺住民への注意喚起と、要配慮者への状況確認を継続。避難所開設準備や土のう配布体制の再確認も行う。	平成25年台風18号時にも、淀川本流から離れた高台地域では大きな冠水被害は報告されていない。	[]	[]
		1-21	800	発災95分後					淀川本流から約800m離れており、周辺は住宅地でやや高台となっている。標高は中心部より高く、広範囲の洪水被害は発生しにくい。局所的な低地部分で一時的な冠水の可能性はあるが、現段階では顕著な被害は出ていない。					現時点で目立った増水や冠水は確認されていない	被害なし	道路や住宅への浸水・冠水は引き続き確認されていない。住民からの被害通報もなく、通常通りの生活が維持されている。	今後の増水や下流域の氾濫情報に備えた情報収集と警戒態勢の維持。周辺住民への注意喚起と、要配慮者への状況確認を継続。避難所開設準備や土のう配布体制の再確認も行う。	平成25年台風18号時にも、淀川本流から離れた高台地域では大きな冠水被害は報告されていない。	[]	[]
		1-22	800	発災98分後					淀川本流から約800m離れており、周辺は住宅地でやや高台となっている。標高は中心部より高く、広範囲の洪水被害は発生しにくい。局所的な低地部分で一時的な冠水の可能性はあるが、現段階では顕著な被害は出ていない。					現時点で目立った増水や冠水は確認されていない	被害なし	道路や住宅への浸水・冠水は引き続き確認されていない。住民からの被害通報もなく、通常通りの生活が維持されている。	今後の増水や下流域の氾濫情報に備えた情報収集と警戒態勢の維持。周辺住民への注意喚起と、要配慮者への状況確認を継続。避難所開設準備や土のう配布体制の再確認も行う。	平成25年台風18号時にも、淀川本流から離れた高台地域では大きな冠水被害は報告されていない。	[]	[]
		1-23	800	発災104分後					淀川本流から約800m離れており、周辺は住宅地でやや高台となっている。標高は中心部より高く、広範囲の洪水被害は発生しにくい。局所的な低地部分で一時的な冠水の可能性はあるが、現段階では顕著な被害は出ていない。					現時点で目立った増水や冠水は確認されていない	被害なし	道路や住宅への浸水・冠水は引き続き確認されていない。住民からの被害通報もなく、通常通りの生活が維持されている。	今後の増水や下流域の氾濫情報に備えた情報収集と警戒態勢の維持。周辺住民への注意喚起と、要配慮者への状況確認を継続。避難所開設準備や土のう配布体制の再確認も行う。	平成25年台風18号時にも、淀川本流から離れた高台地域では大きな冠水被害は報告されていない。	[]	[]
		1-24	800	発災109分後					淀川本流から約800m離れており、周辺は住宅地でやや高台となっている。標高は中心部より高く、広範囲の洪水被害は発生しにくい。局所的な低地部分で一時的な冠水の可能性はあるが、現段階では顕著な被害は出ていない。					現時点で目立った増水や冠水は確認されていない	被害なし	道路や住宅への浸水・冠水は引き続き確認されていない。住民からの被害通報もなく、通常通りの生活が維持されている。	今後の増水や下流域の氾濫情報に備えた情報収集と警戒態勢の維持。周辺住民への注意喚起と、要配慮者への状況確認を継続。避難所開設準備や土のう配布体制の再確認も行う。	平成25年台風18号時にも、淀川本流から離れた高台地域では大きな冠水被害は報告されていない。	[]	[]
		1-25	800	発災113分後					淀川本流から約800m離れており、周辺は住宅地でやや高台となっている。標高は中心部より高く、広範囲の洪水被害は発生しにくい。局所的な低地部分で一時的な冠水の可能性はあるが、現段階では顕著な被害は出ていない。					現時点で目立った増水や冠水は確認されていない	被害なし	道路や住宅への浸水・冠水は引き続き確認されていない。住民からの被害通報もなく、通常通りの生活が維持されている。	今後の増水や下流域の氾濫情報に備えた情報収集と警戒態勢の維持。周辺住民への注意喚起と、要配慮者への状況確認を継続。避難所開設準備や土のう配布体制の再確認も行う。	平成25年台風18号時にも、淀川本流から離れた高台地域では大きな冠水被害は報告されていない。	[]	[]
		1-26	800	発災116分後					淀川本流から約800m離れており、周辺は住宅地でやや高台となっている。標高は中心部より高く、広範囲の洪水被害は発生しにくい。局所的な低地部分で一時的な冠水の可能性はあるが、現段階では顕著な被害は出ていない。					現時点で目立った増水や冠水は確認されていない	被害なし	道路や住宅への浸水・冠水は引き続き確認されていない。住民からの被害通報もなく、通常通りの生活が維持されている。	今後の増水や下流域の氾濫情報に備えた情報収集と警戒態勢の維持。周辺住民への注意喚起と、要配慮者への状況確認を継続。避難所開設準備や土のう配布体制の再確認も行う。	平成25年台風18号時にも、淀川本流から離れた高台地域では大きな冠水被害は報告されていない。	[]	[]
		1-27	800	発災123分後					淀川本流から約800m離れており、周辺は住宅地でやや高台となっている。標高は中心部より高く、広範囲の洪水被害は発生しにくい。局所的な低地部分で一時的な冠水の可能性はあるが、現段階では顕著な被害は出ていない。					現時点で目立った増水や冠水は確認されていない	被害なし	道路や住宅への浸水・冠水は引き続き確認されていない。住民からの被害通報もなく、通常通りの生活が維持されている。	今後の増水や下流域の氾濫情報に備えた情報収集と警戒態勢の維持。周辺住民への注意喚起と、要配慮者への状況確認を継続。避難所開設準備や土のう配布体制の再確認も行う。	平成25年台風18号時にも、淀川本流から離れた高台地域では大きな冠水被害は報告されていない。	[]	[]
		1-28	800	発災128分後					淀川本流から約800m離れており、周辺は住宅地でやや高台となっている。標高は中心部より高く、広範囲の洪水被害は発生しにくい。局所的な低地部分で一時的な冠水の可能性はあるが、現段階では顕著な被害は出ていない。					現時点で目立った増水や冠水は確認されていない	被害なし	道路や住宅への浸水・冠水は引き続き確認されていない。住民からの被害通報もなく、通常通りの生活が維持されている。	今後の増水や下流域の氾濫情報に備えた情報収集と警戒態勢の維持。周辺住民への注意喚起と、要配慮者への状況確認を継続。避難所開設準備や土のう配布体制の再確認も行う。	平成25年台風18号時にも、淀川本流から離れた高台地域では大きな冠水被害は報告されていない。	[]	[]
		1-29	800	発災135分後					淀川本流から約800m離れており、周辺は住宅地でやや高台となっている。標高は中心部より高く、広範囲の洪水被害は発生しにくい。局所的な低地部分で一時的な冠水の可能性はあるが、現段階では顕著な被害は出ていない。					現時点で目立った増水や冠水は確認されていない	被害なし	道路や住宅への浸水・冠水は引き続き確認されていない。住民からの被害通報もなく、通常通りの生活が維持されている。	今後の増水や下流域の氾濫情報に備えた情報収集と警戒態勢の維持。周辺住民への注意喚起と、要配慮者への状況確認を継続。避難所開設準備や土のう配布体制の再確認も行う。	平成25年台風18号時にも、淀川本流から離れた高台地域では大きな冠水被害は報告されていない。	[]	[]
		1-30	800	発災138分後					淀川本流から約800m離れており、周辺は住宅地でやや高台となっている。標高は中心部より高く、広範囲の洪水被害は発生しにくい。局所的な低地部分で一時的な冠水の可能性はあるが、現段階では顕著な被害は出ていない。					現時点で目立った増水や冠水は確認されていない	被害なし	道路や住宅への浸水・冠水は引き続き確認されていない。住民からの被害通報もなく、通常通りの生活が維持されている。	今後の増水や下流域の氾濫情報に備えた情報収集と警戒態勢の維持。周辺住民への注意喚起と、要配慮者への状況確認を継続。避難所開設準備や土のう配布体制の再確認も行う。	平成25年台風18号時にも、淀川本流から離れた高台地域では大きな冠水被害は報告されていない。	[]	[]
		1-31	800	発災144分後					淀川本流から約800m離れた住宅地で、やや高台に位置する。周辺は広範囲の洪水被害が発生しにくい地形であり、低地部に比べて浸水リスクは低い。局所的な低地や側溝の溢水には引き続き注意が必要。					現時点で目立った増水や冠水は確認されていない	被害なし	道路や住宅への浸水・冠水は引き続き確認されていない。住民からの被害通報もなく、通常通りの生活が維持されている。	今後の増水や下流域の氾濫情報に引き続き注意。周辺住民への警戒情報の周知、要配慮者への定期的な状況確認、避難所開設準備や土のう配布体制の再点検を継続する。	平成25年台風18号時にも、淀川本流から離れた高台地域では大きな冠水被害は報告されていない。	[]	[]
		1-32	800	発災148分後					淀川本流から約800m離れた住宅地で、やや高台に位置する。周辺は広範囲の洪水被害が発生しにくい地形であり、低地部に比べて浸水リスクは低い。局所的な低地や側溝の溢水には引き続き注意が必要。					現時点で目立った増水や冠水は確認されていない	被害なし	道路や住宅への浸水・冠水は引き続き確認されていない。住民からの被害通報もなく、通常通りの生活が維持されている。	今後の増水や下流域の氾濫情報に引き続き注意。周辺住民への警戒情報の周知、要配慮者への定期的な状況確認、避難所開設準備や土のう配布体制の再点検を継続する。	平成25年台風18号時にも、淀川本流から離れた高台地域では大きな冠水被害は報告されていない。	[]	[]
		1-33	800	発災151分後					淀川本流から約800m離れた住宅地で、やや高台に位置する。周辺は広範囲の洪水被害が発生しにくい地形であり、低地部に比べて浸水リスクは低い。局所的な低地や側溝の溢水には引き続き注意が必要。					現時点で目立った増水や冠水は確認されていない	被害なし	道路や住宅への浸水・冠水は引き続き確認されていない。住民からの被害通報もなく、通常通りの生活が維持されている。	今後の増水や下流域の氾濫情報に引き続き注意。周辺住民への警戒情報の周知、要配慮者への定期的な状況確認、避難所開設準備や土のう配布体制の再点検を継続する。	平成25年台風18号時にも、淀川本流から離れた高台地域では大きな冠水被害は報告されていない。	[]	[]
		1-34	800	発災159分後					淀川本流から約800m離れた住宅地で、やや高台に位置する。周辺は広範囲の洪水被害が発生しにくい地形であり、低地部に比べて浸水リスクは低い。局所的な低地や側溝の溢水には引き続き注意が必要。					現時点で目立った増水や冠水は確認されていない	被害なし	道路や住宅への浸水・冠水は引き続き確認されていない。住民からの被害通報もなく、通常通りの生活が維持されている。	今後の増水や下流域の氾濫情報に引き続き注意。周辺住民への警戒情報の周知、要配慮者への定期的な状況確認、避難所開設準備や土のう配布体制の再点検を継続する。	平成25年台風18号時にも、淀川本流から離れた高台地域では大きな冠水被害は報告されていない。	[]	[]
		1-35	800	発災162分後					淀川本流から約800m離れた住宅地で、やや高台に位置する。広範囲の洪水被害が発生しにくい地形であり、低地部に比べて浸水リスクは低い。局所的な低地や側溝の溢水には引き続き注意が必要。					現時点でも目立った増水や冠水は確認されていない	被害なし	道路や住宅への浸水・冠水は引き続き確認されていない。住民からの被害通報もなく、通常通りの生活が維持されている。	今後の増水や下流域の氾濫情報に引き続き注意。周辺住民への警戒情報の周知、要配慮者への定期的な状況確認、避難所開設準備や土のう配布体制の再点検を継続する。	平成25年台風18号時にも、淀川本流から離れた高台地域では大きな冠水被害は報告されていない。	[]	[]
		1-36	800	発災167分後					淀川本流から約800m離れた住宅地で、やや高台に位置する。広範囲の洪水被害が発生しにくい地形であり、低地部に比べて浸水リスクは低い。局所的な低地や側溝の溢水には引き続き注意が必要。					現時点でも目立った増水や冠水は確認されていない	被害なし	道路や住宅への浸水・冠水は引き続き確認されていない。住民からの被害通報もなく、通常通りの生活が維持されている。	今後の増水や下流域の氾濫情報に引き続き注意。周辺住民への警戒情報の周知、要配慮者への定期的な状況確認、避難所開設準備や土のう配布体制の再点検を継続する。	平成25年台風18号時にも、淀川本流から離れた高台地域では大きな冠水被害は報告されていない。	[]	[]
		1-37	800	発災175分後					淀川本流から約800m離れた住宅地で、やや高台に位置する。広範囲の洪水被害が発生しにくい地形であり、低地部に比べて浸水リスクは低い。局所的な低地や側溝の溢水には引き続き注意が必要。					現時点でも目立った増水や冠水は確認されていない	被害なし	道路や住宅への浸水・冠水は引き続き確認されていない。住民からの被害通報もなく、通常通りの生活が維持されている。	今後の増水や下流域の氾濫情報に引き続き注意。周辺住民への警戒情報の周知、要配慮者への定期的な状況確認、避難所開設準備や土のう配布体制の再点検を継続する。	平成25年台風18号時にも、淀川本流から離れた高台地域では大きな冠水被害は報告されていない。	[]	[]
		1-38	800	発災177分後					淀川本流から約800m離れた住宅地で、やや高台に位置する。広範囲の洪水被害が発生しにくい地形であり、低地部に比べて浸水リスクは低い。局所的な低地や側溝の溢水には引き続き注意が必要。					現時点でも目立った増水や冠水は確認されていない	被害なし	道路や住宅への浸水・冠水は引き続き確認されていない。住民からの被害通報もなく、通常通りの生活が維持されている。	今後の増水や下流域の氾濫情報に引き続き注意。周辺住民への警戒情報の周知、要配慮者への定期的な状況確認、避難所開設準備や土のう配布体制の再点検を継続する。	平成25年台風18号時にも、淀川本流から離れた高台地域では大きな冠水被害は報告されていない。	[]	[]
		1-39	800	発災184分後					淀川本流から約800m離れた住宅地で、やや高台に位置する。広範囲の洪水被害が発生しにくい地形であり、低地部に比べて浸水リスクは低い。局所的な低地や側溝の溢水には引き続き注意が必要。					現時点でも目立った増水や冠水は確認されていない	被害なし	道路や住宅への浸水・冠水は引き続き確認されていない。住民からの被害通報もなく、通常通りの生活が維持されている。	今後の増水や下流域の氾濫情報に引き続き注意。周辺住民への警戒情報の周知、要配慮者への定期的な状況確認、避難所開設準備や土のう配布体制の再点検を継続する。	平成25年台風18号時にも、淀川本流から離れた高台地域では大きな冠水被害は報告されていない。	[]	[]

## Sheet: 枚方市西招提町2173
評価	備考	シナリオID	(推測)災害の中心からの距離[m]	イベント発生時刻	付与内容	情報源	状況付与内容	補足情報	地形情報や想定想定される被害の特徴	訓練効果・狙い	判断ポイント	期待される対応行動	想定される課題	水位状況	被害の種類	詳細な被害状況	想定される対策	類似の過去事例(あれば記載)	直近のリスク	二次的なリスク
		1-5	1850	発災5分後					淀川本流から約1.85km離れており、周辺は住宅地と農地が混在するやや高台。標高は中心部より高く、直接的な氾濫水の流入リスクは低い。過去の洪水でも大きな浸水被害は報告されていない。					現時点で目立った増水や冠水は確認されていない	被害なし	現時点では道路や住宅への浸水・冠水は確認されていない。住民からの被害通報も入っていない。	今後の増水や下流域の氾濫情報に備えた情報収集と警戒態勢の維持。周辺住民への注意喚起と、要配慮者への状況確認を継続する。	平成25年台風18号時にも、淀川本流から離れた高台地域では大きな冠水被害は報告されていない。	[]	[]
		1-6	1850	発災7分後					淀川本流から約1.85km離れており、周辺は住宅地と農地が混在するやや高台。標高は中心部より高く、直接的な氾濫水の流入リスクは低い。過去の洪水でも大きな浸水被害は報告されていない。					現時点で目立った増水や冠水は確認されていない	被害なし	現時点では道路や住宅への浸水・冠水は確認されていない。住民からの被害通報も入っていない。	今後の増水や下流域の氾濫情報に備えた情報収集と警戒態勢の維持。周辺住民への注意喚起と、要配慮者への状況確認を継続する。	平成25年台風18号時にも、淀川本流から離れた高台地域では大きな冠水被害は報告されていない。	[]	[]
		1-7	1850	発災15分後					淀川本流から約1.85km離れており、周辺は住宅地と農地が混在するやや高台。標高は中心部より高く、直接的な氾濫水の流入リスクは低い。過去の洪水でも大きな浸水被害は報告されていない。					現時点で目立った増水や冠水は確認されていない	被害なし	発災15分時点でも道路や住宅への浸水・冠水は確認されていない。住民からの被害通報も入っていない。	今後の増水や下流域の氾濫情報に備えた情報収集と警戒態勢の維持。周辺住民への注意喚起と、要配慮者への状況確認を継続する。	平成25年台風18号時にも、淀川本流から離れた高台地域では大きな冠水被害は報告されていない。	[]	[]
		1-8	1850	発災19分後					淀川本流から約1.85km離れており、周辺は住宅地と農地が混在するやや高台。標高は中心部より高く、直接的な氾濫水の流入リスクは低い。過去の洪水でも大きな浸水被害は報告されていない。					現時点で目立った増水や冠水は確認されていない	被害なし	発災19分時点でも道路や住宅への浸水・冠水は確認されていない。住民からの被害通報も入っていない。	今後の増水や下流域の氾濫情報に備えた情報収集と警戒態勢の維持。周辺住民への注意喚起と、要配慮者への状況確認を継続する。	平成25年台風18号時にも、淀川本流から離れた高台地域では大きな冠水被害は報告されていない。	[]	[]
		1-9	1850	発災24分後					淀川本流から約1.85km離れており、周辺は住宅地と農地が混在するやや高台。標高は中心部より高く、直接的な氾濫水の流入リスクは低い。過去の洪水でも大きな浸水被害は報告されていない。					現時点で目立った増水や冠水は確認されていない	被害なし	発災24分時点でも道路や住宅への浸水・冠水は確認されていない。住民からの被害通報も入っていない。	今後の増水や下流域の氾濫情報に備えた情報収集と警戒態勢の維持。周辺住民への注意喚起と、要配慮者への状況確認を継続する。	平成25年台風18号時にも、淀川本流から離れた高台地域では大きな冠水被害は報告されていない。	[]	[]
		1-10	1850	発災30分後					淀川本流から約1.85km離れており、周辺は住宅地と農地が混在するやや高台。標高は中心部より高く、直接的な氾濫水の流入リスクは低い。過去の洪水でも大きな浸水被害は報告されていない。					現時点で目立った増水や冠水は確認されていない	被害なし	発災30分時点でも道路や住宅への浸水・冠水は確認されていない。住民からの被害通報も入っていない。	今後の増水や下流域の氾濫情報に備えた情報収集と警戒態勢の維持。周辺住民への注意喚起と、要配慮者への状況確認を継続する。	平成25年台風18号時にも、淀川本流から離れた高台地域では大きな冠水被害は報告されていない。	[]	[]
		1-11	1850	発災35分後					淀川本流から約1.85km離れており、周辺は住宅地と農地が混在するやや高台。標高は中心部より高く、直接的な氾濫水の流入リスクは低い。過去の洪水でも大きな浸水被害は報告されていない。					現時点で目立った増水や冠水は確認されていない	被害なし	発災35分時点でも道路や住宅への浸水・冠水は確認されていない。住民からの被害通報も入っていない。	今後の増水や下流域の氾濫情報に備えた情報収集と警戒態勢の維持。周辺住民への注意喚起と、要配慮者への状況確認を継続する。	平成25年台風18号時にも、淀川本流から離れた高台地域では大きな冠水被害は報告されていない。	[]	[]
		1-12	1850	発災40分後					淀川本流から約1.85km離れており、周辺は住宅地と農地が混在するやや高台。標高は中心部より高く、直接的な氾濫水の流入リスクは低い。過去の洪水でも大きな浸水被害は報告されていない。					現時点で目立った増水や冠水は確認されていない	被害なし	発災40分時点でも道路や住宅への浸水・冠水は確認されていない。住民からの被害通報も入っていない。	今後の増水や下流域の氾濫情報に備えた情報収集と警戒態勢の維持。周辺住民への注意喚起と、要配慮者への状況確認を継続する。	平成25年台風18号時にも、淀川本流から離れた高台地域では大きな冠水被害は報告されていない。	[]	[]
		1-13	1850	発災41分後					淀川本流から約1.85km離れており、周辺は住宅地と農地が混在するやや高台。標高は中心部より高く、直接的な氾濫水の流入リスクは低い。過去の洪水でも大きな浸水被害は報告されていない。					現時点で目立った増水や冠水は確認されていない	被害なし	発災41分時点でも道路や住宅への浸水・冠水は確認されていない。住民からの被害通報も入っていない。	今後の増水や下流域の氾濫情報に備えた情報収集と警戒態勢の維持。周辺住民への注意喚起と、要配慮者への状況確認を継続する。	平成25年台風18号時にも、淀川本流から離れた高台地域では大きな冠水被害は報告されていない。	[]	[]
		1-14	1850	発災47分後					淀川本流から約1.85km離れており、周辺は住宅地と農地が混在するやや高台。標高は中心部より高く、直接的な氾濫水の流入リスクは低い。過去の洪水でも大きな浸水被害は報告されていない。					現時点で目立った増水や冠水は確認されていない	被害なし	発災47分時点でも道路や住宅への浸水・冠水は確認されていない。住民からの被害通報も入っていない。	今後の増水や下流域の氾濫情報に備えた情報収集と警戒態勢の維持。周辺住民への注意喚起と、要配慮者への状況確認を継続する。	平成25年台風18号時にも、淀川本流から離れた高台地域では大きな冠水被害は報告されていない。	[]	[]
		1-15	1850	発災52分後					淀川本流から約1.85km離れており、周辺は住宅地と農地が混在するやや高台。標高は中心部より高く、直接的な氾濫水の流入リスクは低い。過去の洪水でも大きな浸水被害は報告されていない。					現時点で目立った増水や冠水は確認されていない	被害なし	発災52分時点でも道路や住宅への浸水・冠水は確認されていない。住民からの被害通報も入っていない。通常通りの生活が維持されている。	今後の増水や下流域の氾濫情報に備えた情報収集と警戒態勢の維持。周辺住民への注意喚起と、要配慮者への状況確認を継続する。	平成25年台風18号時にも、淀川本流から離れた高台地域では大きな冠水被害は報告されていない。	[]	[]
		1-16	1850	発災58分後					淀川本流から約1.85km離れており、周辺は住宅地と農地が混在するやや高台。標高は中心部より高く、直接的な氾濫水の流入リスクは低い。過去の洪水でも大きな浸水被害は報告されていない。					現時点で目立った増水や冠水は確認されていない	被害なし	発災58分時点でも道路や住宅への浸水・冠水は確認されていない。住民からの被害通報も入っていない。通常通りの生活が維持されている。	今後の増水や下流域の氾濫情報に備えた情報収集と警戒態勢の維持。周辺住民への注意喚起と、要配慮者への状況確認を継続する。	平成25年台風18号時にも、淀川本流から離れた高台地域では大きな冠水被害は報告されていない。	[]	[]
		1-17	1850	発災65分後					淀川本流から約1.85km離れており、周辺は住宅地と農地が混在するやや高台。標高は中心部より高く、直接的な氾濫水の流入リスクは低い。過去の洪水でも大きな浸水被害は報告されていない。					現時点で目立った増水や冠水は確認されていない	被害なし	発災65分時点でも道路や住宅への浸水・冠水は確認されていない。住民からの被害通報も入っていない。通常通りの生活が維持されている。	今後の増水や下流域の氾濫情報に備えた情報収集と警戒態勢の維持。周辺住民への注意喚起と、要配慮者への状況確認を継続する。	平成25年台風18号時にも、淀川本流から離れた高台地域では大きな冠水被害は報告されていない。	[]	[]
		1-18	1850	発災67分後					淀川本流から約1.85km離れており、周辺は住宅地と農地が混在するやや高台。標高は中心部より高く、直接的な氾濫水の流入リスクは低い。過去の洪水でも大きな浸水被害は報告されていない。					現時点で目立った増水や冠水は確認されていない	被害なし	発災67分時点でも道路や住宅への浸水・冠水は確認されていない。住民からの被害通報も入っていない。通常通りの生活が維持されている。	今後の増水や下流域の氾濫情報に備えた情報収集と警戒態勢の維持。周辺住民への注意喚起と、要配慮者への状況確認を継続する。	平成25年台風18号時にも、淀川本流から離れた高台地域では大きな冠水被害は報告されていない。	[]	[]
		1-19	1850	発災73分後					淀川本流から約1.85km離れており、周辺は住宅地と農地が混在するやや高台。標高は中心部より高く、直接的な氾濫水の流入リスクは低い。過去の洪水でも大きな浸水被害は報告されていない。					現時点で目立った増水や冠水は確認されていない	被害なし	発災73分時点でも道路や住宅への浸水・冠水は確認されていない。住民からの被害通報も入っていない。通常通りの生活が維持されている。	今後の増水や下流域の氾濫情報に備えた情報収集と警戒態勢の維持。周辺住民への注意喚起と、要配慮者への状況確認を継続する。	平成25年台風18号時にも、淀川本流から離れた高台地域では大きな冠水被害は報告されていない。	[]	[]
		1-20	1850	発災78分後					淀川本流から約1.85km離れており、周辺は住宅地と農地が混在するやや高台。標高は中心部より高く、直接的な氾濫水の流入リスクは低い。過去の洪水でも大きな浸水被害は報告されていない。					現時点で目立った増水や冠水は確認されていない	被害なし	発災78分時点でも道路や住宅への浸水・冠水は確認されていない。住民からの被害通報も入っていない。通常通りの生活が維持されている。	今後の増水や下流域の氾濫情報に備えた情報収集と警戒態勢の維持。周辺住民への注意喚起と、要配慮者への状況確認を継続する。	平成25年台風18号時にも、淀川本流から離れた高台地域では大きな冠水被害は報告されていない。	[]	[]
		1-21	1850	発災83分後					淀川本流から約1.85km離れており、周辺は住宅地と農地が混在するやや高台。標高は中心部より高く、直接的な氾濫水の流入リスクは低い。過去の洪水でも大きな浸水被害は報告されていない。					現時点で目立った増水や冠水は確認されていない	被害なし	発災83分時点でも道路や住宅への浸水・冠水は確認されていない。住民からの被害通報も入っていない。通常通りの生活が維持されている。	今後の増水や下流域の氾濫情報に備えた情報収集と警戒態勢の維持。周辺住民への注意喚起と、要配慮者への状況確認を継続する。	平成25年台風18号時にも、淀川本流から離れた高台地域では大きな冠水被害は報告されていない。	[]	[]
		1-22	1850	発災87分後					淀川本流から約1.85km離れており、周辺は住宅地と農地が混在するやや高台。標高は中心部より高く、直接的な氾濫水の流入リスクは低い。過去の洪水でも大きな浸水被害は報告されていない。					現時点で目立った増水や冠水は確認されていない	被害なし	発災87分時点でも道路や住宅への浸水・冠水は確認されていない。住民からの被害通報も入っていない。通常通りの生活が維持されている。	今後の増水や下流域の氾濫情報に備えた情報収集と警戒態勢の維持。周辺住民への注意喚起と、要配慮者への状況確認を継続する。	平成25年台風18号時にも、淀川本流から離れた高台地域では大きな冠水被害は報告されていない。	[]	[]
		1-23	1850	発災95分後					淀川本流から約1.85km離れており、周辺は住宅地と農地が混在するやや高台。標高は中心部より高く、直接的な氾濫水の流入リスクは低い。過去の洪水でも大きな浸水被害は報告されていない。					現時点で目立った増水や冠水は確認されていない	被害なし	発災95分時点でも道路や住宅への浸水・冠水は確認されていない。住民からの被害通報も入っていない。通常通りの生活が維持されている。	今後の増水や下流域の氾濫情報に備えた情報収集と警戒態勢の維持。周辺住民への注意喚起と、要配慮者への状況確認を継続する。	平成25年台風18号時にも、淀川本流から離れた高台地域では大きな冠水被害は報告されていない。	[]	[]
		1-24	1850	発災98分後					淀川本流から約1.85km離れており、周辺は住宅地と農地が混在するやや高台。標高は中心部より高く、直接的な氾濫水の流入リスクは低い。過去の洪水でも大きな浸水被害は報告されていない。					現時点で目立った増水や冠水は確認されていない	被害なし	発災98分時点でも道路や住宅への浸水・冠水は確認されていない。住民からの被害通報も入っていない。通常通りの生活が維持されている。	今後の増水や下流域の氾濫情報に備えた情報収集と警戒態勢の維持。周辺住民への注意喚起と、要配慮者への状況確認を継続する。	平成25年台風18号時にも、淀川本流から離れた高台地域では大きな冠水被害は報告されていない。	[]	[]
		1-25	1850	発災103分後					淀川本流から約1.85km離れており、周辺は住宅地と農地が混在するやや高台。標高は中心部より高く、直接的な氾濫水の流入リスクは低い。過去の洪水でも大きな浸水被害は報告されていない。					現時点で目立った増水や冠水は確認されていない	被害なし	発災103分時点でも道路や住宅への浸水・冠水は確認されていない。住民からの被害通報も入っていない。通常通りの生活が維持されている。	今後の増水や下流域の氾濫情報に備えた情報収集と警戒態勢の維持。周辺住民への注意喚起と、要配慮者への状況確認を継続する。	平成25年台風18号時にも、淀川本流から離れた高台地域では大きな冠水被害は報告されていない。	[]	[]
		1-26	1850	発災106分後					淀川本流から約1.85km離れており、周辺は住宅地と農地が混在するやや高台。標高は中心部より高く、直接的な氾濫水の流入リスクは低い。過去の洪水でも大きな浸水被害は報告されていない。					現時点で目立った増水や冠水は確認されていない	被害なし	道路や住宅への浸水・冠水は引き続き確認されていない。住民からの被害通報もなく、通常通りの生活が維持されている。	今後の増水や下流域の氾濫情報に備えた情報収集と警戒態勢の維持。周辺住民への注意喚起と、要配慮者への状況確認を継続する。	平成25年台風18号時にも、淀川本流から離れた高台地域では大きな冠水被害は報告されていない。	[]	[]
		1-27	1850	発災113分後					淀川本流から約1.85km離れており、周辺は住宅地と農地が混在するやや高台。標高は中心部より高く、直接的な氾濫水の流入リスクは低い。過去の洪水でも大きな浸水被害は報告されていない。					現時点で目立った増水や冠水は確認されていない	被害なし	道路や住宅への浸水・冠水は引き続き確認されていない。住民からの被害通報もなく、通常通りの生活が維持されている。	今後の増水や下流域の氾濫情報に備えた情報収集と警戒態勢の維持。周辺住民への注意喚起と、要配慮者への状況確認を継続する。	平成25年台風18号時にも、淀川本流から離れた高台地域では大きな冠水被害は報告されていない。	[]	[]
		1-28	1850	発災118分後					淀川本流から約1.85km離れており、周辺は住宅地と農地が混在するやや高台。標高は中心部より高く、直接的な氾濫水の流入リスクは低い。過去の洪水でも大きな浸水被害は報告されていない。					現時点で目立った増水や冠水は確認されていない	被害なし	道路や住宅への浸水・冠水は引き続き確認されていない。住民からの被害通報もなく、通常通りの生活が維持されている。	今後の増水や下流域の氾濫情報に備えた情報収集と警戒態勢の維持。周辺住民への注意喚起と、要配慮者への状況確認を継続する。	平成25年台風18号時にも、淀川本流から離れた高台地域では大きな冠水被害は報告されていない。	[]	[]
		1-29	1850	発災124分後					淀川本流から約1.85km離れており、周辺は住宅地と農地が混在するやや高台。標高は中心部より高く、直接的な氾濫水の流入リスクは低い。過去の洪水でも大きな浸水被害は報告されていない。					現時点で目立った増水や冠水は確認されていない	被害なし	発災124分時点でも道路や住宅への浸水・冠水は確認されていない。住民からの被害通報もなく、通常通りの生活が維持されている。	今後の増水や下流域の氾濫情報に備えた情報収集と警戒態勢の維持。周辺住民への注意喚起と、要配慮者への状況確認を継続する。	平成25年台風18号時にも、淀川本流から離れた高台地域では大きな冠水被害は報告されていない。	[]	[]
		1-30	1850	発災127分後					淀川本流から約1.85km離れており、周辺は住宅地と農地が混在するやや高台。標高は中心部より高く、直接的な氾濫水の流入リスクは低い。過去の洪水でも大きな浸水被害は報告されていない。					現時点で目立った増水や冠水は確認されていない	被害なし	発災127分時点でも道路や住宅への浸水・冠水は確認されていない。住民からの被害通報もなく、通常通りの生活が維持されている。	今後の増水や下流域の氾濫情報に備えた情報収集と警戒態勢の維持。周辺住民への注意喚起と、要配慮者への状況確認を継続する。	平成25年台風18号時にも、淀川本流から離れた高台地域では大きな冠水被害は報告されていない。	[]	[]
		1-31	1850	発災134分後					淀川本流から約1.85km離れており、周辺は住宅地と農地が混在するやや高台。標高は中心部より高く、直接的な氾濫水の流入リスクは低い。過去の洪水でも大きな浸水被害は報告されていない。					現時点で目立った増水や冠水は確認されていない	被害なし	道路や住宅への浸水・冠水は引き続き発生しておらず、住民からの被害通報もない。通常通りの生活が維持されている。	今後の増水や下流域の氾濫情報に備えた情報収集と警戒態勢の維持。周辺住民への注意喚起と、要配慮者への状況確認を継続する。	平成25年台風18号時にも、淀川本流から離れた高台地域では大きな冠水被害は報告されていない。	[]	[]
		1-32	1850	発災139分後					淀川本流から約1.85km離れており、周辺は住宅地と農地が混在するやや高台。標高は中心部より高く、直接的な氾濫水の流入リスクは低い。過去の洪水でも大きな浸水被害は報告されていない。					現時点で目立った増水や冠水は確認されていない	被害なし	発災139分時点でも道路や住宅への浸水・冠水は確認されていない。住民からの被害通報も入っていない。通常通りの生活が維持されている。	今後の増水や下流域の氾濫情報に備えた情報収集と警戒態勢の維持。周辺住民への注意喚起と、要配慮者への状況確認を継続する。	平成25年台風18号時にも、淀川本流から離れた高台地域では大きな冠水被害は報告されていない。	[]	[]
		1-33	1850	発災145分後					淀川本流から約1.85km離れており、周辺は住宅地と農地が混在するやや高台。標高は中心部より高く、直接的な氾濫水の流入リスクは低い。過去の洪水でも大きな浸水被害は報告されていない。					現時点で目立った増水や冠水は確認されていない	被害なし	発災145分時点でも道路や住宅への浸水・冠水は確認されていない。住民からの被害通報も入っていない。通常通りの生活が維持されている。	今後の増水や下流域の氾濫情報に備えた情報収集と警戒態勢の維持。周辺住民への注意喚起と、要配慮者への状況確認を継続する。	平成25年台風18号時にも、淀川本流から離れた高台地域では大きな冠水被害は報告されていない。	[]	[]
		1-34	1850	発災150分後					淀川本流から約1.85km離れており、周辺は住宅地と農地が混在するやや高台。標高は中心部より高く、直接的な氾濫水の流入リスクは低い。過去の洪水でも大きな浸水被害は報告されていない。					現時点でも目立った増水や冠水は確認されていない	被害なし	道路や住宅への浸水・冠水は引き続き発生しておらず、住民からの被害通報もない。通常通りの生活が維持されている。	今後の増水や下流域の氾濫情報に備えた情報収集と警戒態勢の維持。周辺住民への注意喚起と、要配慮者への状況確認を継続する。	平成25年台風18号時にも、淀川本流から離れた高台地域では大きな冠水被害は報告されていない。	[]	[]
		1-35	1850	発災155分後					淀川本流から約1.85km離れており、周辺は住宅地と農地が混在するやや高台。標高は中心部より高く、直接的な氾濫水の流入リスクは低い。過去の洪水でも大きな浸水被害は報告されていない。					現時点でも目立った増水や冠水は確認されていない	被害なし	道路や住宅への浸水・冠水は引き続き発生しておらず、住民からの被害通報もない。通常通りの生活が維持されている。	今後の増水や下流域の氾濫情報に備えた情報収集と警戒態勢の維持。周辺住民への注意喚起と、要配慮者への状況確認を継続する。	平成25年台風18号時にも、淀川本流から離れた高台地域では大きな冠水被害は報告されていない。	[]	[]
		1-36	1850	発災158分後					淀川本流から約1.85km離れており、周辺は住宅地と農地が混在するやや高台。標高は中心部や低地部より高く、直接的な氾濫水の流入リスクは低い。過去の洪水でも大きな浸水被害は報告されていない。					現時点でも目立った増水や冠水は確認されていない	被害なし	道路や住宅への浸水・冠水は引き続き発生しておらず、住民からの被害通報もない。通常通りの生活が維持されている。	今後の増水や下流域の氾濫情報に備えた情報収集と警戒態勢の維持。周辺住民への注意喚起と、要配慮者への状況確認を継続する。	平成25年台風18号時にも、淀川本流から離れた高台地域では大きな冠水被害は報告されていない。	[]	[]
		1-37	1850	発災164分後					淀川本流から約1.85km離れており、周辺は住宅地と農地が混在するやや高台。標高は中心部や低地部より高く、直接的な氾濫水の流入リスクは低い。過去の洪水でも大きな浸水被害は報告されていない。					現時点でも目立った増水や冠水は確認されていない	被害なし	道路や住宅への浸水・冠水は引き続き発生しておらず、住民からの被害通報もない。通常通りの生活が維持されている。	今後の増水や下流域の氾濫情報に備えた情報収集と警戒態勢の維持。周辺住民への注意喚起と、要配慮者への状況確認を継続する。	平成25年台風18号時にも、淀川本流から離れた高台地域では大きな冠水被害は報告されていない。	[]	[]
		1-38	1850	発災168分後					淀川本流から約1.85km離れており、周辺は住宅地と農地が混在するやや高台。標高は中心部や低地部より高く、直接的な氾濫水の流入リスクは低い。過去の洪水でも大きな浸水被害は報告されていない。					現時点でも目立った増水や冠水は確認されていない	被害なし	道路や住宅への浸水・冠水は引き続き発生しておらず、住民からの被害通報もない。通常通りの生活が維持されている。	今後の増水や下流域の氾濫情報に備えた情報収集と警戒態勢の維持。周辺住民への注意喚起と、要配慮者への状況確認を継続する。	平成25年台風18号時にも、淀川本流から離れた高台地域では大きな冠水被害は報告されていない。	[]	[]
		1-39	1850	発災171分後					淀川本流から約1.85km離れており、周辺は住宅地と農地が混在するやや高台。標高は中心部や低地部より高く、直接的な氾濫水の流入リスクは低い。過去の洪水でも大きな浸水被害は報告されていない。					現時点でも目立った増水や冠水は確認されていない	被害なし	道路や住宅への浸水・冠水は引き続き発生しておらず、住民からの被害通報もない。通常通りの生活が維持されている。	今後の増水や下流域の氾濫情報に備えた情報収集と警戒態勢の維持。周辺住民への注意喚起と、要配慮者への状況確認を継続する。	平成25年台風18号時にも、淀川本流から離れた高台地域では大きな冠水被害は報告されていない。	[]	[]
		1-40	1850	発災179分後					淀川本流から約1.85km離れており、周辺は住宅地と農地が混在するやや高台。標高は中心部や低地部より高く、直接的な氾濫水の流入リスクは低い。過去の洪水でも大きな浸水被害は報告されていない。					現時点でも目立った増水や冠水は確認されていない	被害なし	道路や住宅への浸水・冠水は引き続き発生しておらず、住民からの被害通報もない。通常通りの生活が維持されている。	今後の増水や下流域の氾濫情報に備えた情報収集と警戒態勢の維持。周辺住民への注意喚起と、要配慮者への状況確認を継続する。	平成25年台風18号時にも、淀川本流から離れた高台地域では大きな冠水被害は報告されていない。	[]	[]
		1-41	1850	発災182分後					淀川本流から約1.85km離れており、周辺は住宅地と農地が混在するやや高台。標高は中心部や低地部より高く、直接的な氾濫水の流入リスクは低い。過去の洪水でも大きな浸水被害は報告されていない。					現時点でも目立った増水や冠水は確認されていない	被害なし	道路や住宅への浸水・冠水は引き続き発生しておらず、住民からの被害通報もない。通常通りの生活が維持されている。	今後の増水や下流域の氾濫情報に備えた情報収集と警戒態勢の維持。周辺住民への注意喚起と、要配慮者への状況確認を継続する。	平成25年台風18号時にも、淀川本流から離れた高台地域では大きな冠水被害は報告されていない。	[]	[]

## Sheet: 枚方市楠葉中町52
評価	備考	シナリオID	(推測)災害の中心からの距離[m]	イベント発生時刻	付与内容	情報源	状況付与内容	補足情報	地形情報や想定想定される被害の特徴	訓練効果・狙い	判断ポイント	期待される対応行動	想定される課題	水位状況	被害の種類	詳細な被害状況	想定される対策	類似の過去事例(あれば記載)	直近のリスク	二次的なリスク
		1-2	250	発災5分後	住宅街の一部道路で冠水が始まり、側溝からの溢水が確認されている	住民	自宅前の道路で水がたまり始めており、側溝から水があふれてきている。まだ住宅への浸水はないが、車道の水位が徐々に上がっている。近所の住民も様子を見に出てきている。	消防や警察にはまだ連絡していない。冠水箇所は中町52番地付近の東側道路とのこと。	淀川から約250mの低地で、住宅密集地。地形的に南側がやや窪地となっており、冠水しやすい。下水処理能力を超えると道路冠水が拡大しやすい。	住民からの初期通報をもとに、現場状況の確認と今後の浸水拡大に備えた対応準備を訓練する。	初期冠水情報の把握、現場確認班の派遣、冠水拡大時の避難判断基準の共有、関係機関への情報伝達。	通報内容の詳細聴取、現地状況確認班の派遣、住民への注意喚起と避難準備情報の伝達、側溝や排水口の点検、消防・警察への情報共有。	冠水範囲の正確な把握の遅れ、住民の避難判断の遅延、側溝からの溢水による転倒事故や車両の立ち往生、情報伝達の混乱	道路で足首程度の冠水、側溝からの溢水あり	軽度冠水・交通障害	道路の一部で冠水が始まり、側溝から水があふれている。住宅への直接浸水は現時点で確認されていないが、今後の増水で拡大の恐れ。歩行や車両通行が難しくなりつつある。	住民への早期注意喚起、現場巡回と冠水範囲の確認、側溝・排水口の点検、関係機関への情報共有、避難準備情報の伝達	平成25年台風18号時、同地域で道路冠水と一部住宅床下浸水の報告あり	['道路冠水による通行障害', '側溝溢水による転倒や車両事故']	['冠水拡大による住宅浸水', '下水逆流による衛生被害']
		1-3	250	発災10分後	道路冠水が拡大し、一部の住宅敷地内に水が入り始めたとの現場報告が入る	消防	消防隊が現場確認を行ったところ、中町52番地付近で道路冠水が膝下程度まで拡大。低地側の住宅敷地内にも水が入り始めている。住宅内への本格的な浸水は現時点で確認されていないが、今後の増水に警戒が必要との報告。	現場は住宅密集地で、道路沿いの排水口の一部が既に詰まり始めている。消防は住民への避難準備の呼びかけと排水口の点検を実施中。	淀川から約250mの低地で住宅密集地。南側がやや窪地となっており、冠水しやすい。下水処理能力が限界を超えると道路冠水が拡大しやすい。	冠水拡大時の現場状況把握と、住民への避難準備・情報伝達、消防・行政の現場連携訓練。	消防による現地状況の詳細把握、住民への避難準備呼びかけ、排水機能の確認、冠水拡大時の迅速な初動体制の構築。	消防からの現場情報の受理、避難準備情報の再度伝達、排水口点検の応援要請、要配慮者リストの再確認、住民の安全確保、必要に応じて避難所開設準備。	排水機能の限界による冠水拡大、住民の避難判断遅延、要配慮者の所在確認遅れ、現場と本部間の情報共有不足	道路で膝下程度の冠水、低地側住宅敷地内にも浸水開始	中度冠水・敷地内浸水	道路冠水が拡大し、歩道や一部住宅の敷地内へも浸水が始まっている。住宅内への本格的な浸水は現時点で確認されていないが、増水が続けば床下浸水の恐れあり。排水口の詰まりも発生し、排水機能が低下。	住民への避難準備呼びかけ、排水口・側溝の詰まり点検・清掃、消防・警察・行政の連携強化、要配慮者の所在確認と個別支援、土のう配布・設置支援	平成25年台風18号時、同地域で道路冠水と一部住宅床下浸水・排水口詰まりによる被害が発生した事例あり。	['道路冠水による通行障害', '歩道・敷地内への浸水拡大', '排水口詰まりによるさらなる水位上昇']	['住宅床下浸水による家財被害', '下水逆流による衛生被害', '要配慮者の避難遅延', '冠水拡大による孤立']
		1-4	250	発災11分後	低地側の複数住宅で床下浸水が始まり、要配慮者世帯から避難支援要請が入る	住民	中町52番地付近の低地側に住む高齢者世帯から、床下に水が入り始めており、自力で避難できないとの通報が入った。道路の冠水も膝程度まで進行している。	要配慮者は1世帯（高齢者夫婦のみ）。消防にはすでに連絡済み。該当世帯は南側の窪地に位置する。道路の冠水で外に出るのが困難な状況。	淀川から約250mの低地で住宅密集地。南側が窪地となっており水が集まりやすい。排水能力を超えると短時間で床下浸水や避難困難者が発生しやすい。	床下浸水・要配慮者発生時の安否確認・避難支援要請受理・現場対応指示の訓練。情報の優先順位付けと現場連携の強化を狙う。	要配慮者からの避難支援要請受理、現場への応援・支援班の派遣、床下浸水拡大時の迅速な状況把握と住民安全確保。多機関連携（福祉・消防・警察）の実践。	避難支援要請世帯のリストアップと現場への伝達、消防・警察・福祉部門との連携による支援班派遣、現場状況の継続把握、避難所受け入れ準備の加速、住民への避難情報再通知。	床下浸水拡大による家財被害、要配慮者の避難遅延、支援班の現場到着困難、複数世帯からの同時要請への対応遅延、現場と本部間の情報共有不足	道路で膝程度の冠水、低地側住宅敷地および床下に水が浸入開始	床下浸水・要配慮者避難困難	道路・歩道の冠水がさらに拡大し、複数の住宅で床下浸水が発生。要配慮者世帯（高齢者夫婦）で自力避難が困難なケースが出ており、避難支援要請が入る。排水口の詰まり箇所も増加。	要配慮者名簿の再確認、避難支援班の迅速派遣、現場状況の逐次把握、排水口・側溝の詰まり解消作業、住民への避難情報再通知、消防・警察・福祉部門の連携強化	平成25年台風18号時、同地域で床下浸水と高齢者避難困難事例あり。避難支援要請が集中し対応が遅れた事例も報告されている。	['床下浸水拡大による家財被害', '要配慮者の避難遅延', '道路冠水による通行障害']	['冠水拡大による孤立世帯の発生', '下水逆流による衛生被害', '支援班の現場到着遅延']
		1-5	250	発災16分後	床下浸水がさらに拡大し、低地側の複数住宅で電気設備への浸水リスクが高まる。追加の避難支援要請が入り、現場では感電リスクに注意しながらの救助活動が必要となっている。	消防	消防隊より、中町52番地付近の低地側住宅で床下浸水が10cmを超え、分電盤や電気設備の付近まで水が到達しつつあるとの報告。新たに高齢者世帯1件から避難支援要請あり。現場は膝程度の冠水が続き、車両での進入が困難な状況。	避難支援要請は新たに1世帯（高齢者単身）。消防は徒歩での接近を継続中。分電盤の位置は住宅玄関付近で水位上昇が続いている。	淀川から約250mの低地で住宅密集地。南側が窪地となっており、短時間で浸水拡大しやすい。排水能力を超えると床下浸水や避難困難者が発生しやすい。	床下浸水拡大時の電気設備リスク把握と避難支援要請への迅速対応、現場・本部間の情報共有・連携強化訓練。	電気設備への浸水リスク把握、追加の避難支援要請への優先対応、現場応援体制の再確認、住民・要配慮者の安全確保。	新たな避難支援世帯のリストアップ・現場伝達、電気設備リスクの住民周知、消防・福祉部門との連携で応援班派遣、避難所受け入れ体制の再確認。	床下浸水による感電・火災リスク、複数支援要請への同時対応、車両進入困難による現場到着遅延、情報伝達の遅れ	道路は膝程度の冠水が継続、低地側住宅で床下10cm超の浸水、電気設備付近まで水位上昇	床下浸水拡大・電気設備リスク・追加避難困難	床下浸水が10cm以上となり、複数住宅で分電盤や電気設備の近くまで水位が上昇。追加で高齢者世帯から避難支援要請。車両での接近が困難となり、徒歩での対応を強いられる状況。感電・火災リスクも高まっている。	電気ブレーカーの早期遮断指導、避難支援班の迅速派遣、住民への感電・火災リスクの注意喚起、消防・警察・福祉部門の連携強化、現場状況の随時把握	平成25年台風18号時、同地域で床下浸水から電気設備被害・感電事故寸前の事例あり。避難支援要請が集中し対応が遅れた事例も報告されている。	['床下浸水拡大による家財・電気設備被害', '感電・火災リスク', '要配慮者の避難遅延']	['冠水拡大による孤立世帯の発生', '下水逆流による衛生被害', '支援班の現場到着遅延']
		1-6	250	発災23分後	低地側住宅で床下浸水が継続し、一部住宅で分電盤が浸水したとの報告。現場では感電防止のため電気遮断作業が行われている。	消防	消防隊より、中町52番地付近の低地側住宅で床下浸水が続き、1件の住宅で分電盤が水没。現場で感電防止のためブレーカーを遮断し、追加の避難支援を要請しているとの報告。	現場は住宅密集地で、分電盤が玄関付近床下に設置されている家屋。消防は徒歩で現場対応中。電力会社にも連絡済み。	淀川から約250mの低地で住宅密集地。南側が窪地で水が集まりやすく、排水能力を超えると短時間で床下浸水・電気設備被害が拡大しやすい。要配慮者が多い。	床下浸水が長期化・悪化した場合の電気設備被害・感電防止・現場連携対応訓練。住民・要配慮者の安全確保と多機関連携の実践力向上を狙う。	分電盤浸水時の現場即応（遮断・安全確保）、感電リスク周知、電力会社・消防・福祉部門の連携、避難支援要請の優先順位付け。	消防・電力会社による現場対応、住民へのブレーカー遮断指示、追加避難支援世帯のリストアップと支援班派遣、現場状況の本部共有、避難所受け入れ体制の再確認。	感電・火災リスクの顕在化、現場到着の遅延、多数の避難支援要請同時発生による対応遅れ、情報共有の混乱	道路は膝程度の冠水継続、低地側住宅で床下10cm超の浸水、1件で分電盤水没	床下浸水・電気設備被害・避難困難	床下浸水が継続し、1件の住宅で分電盤が水没。感電リスクが高まり、消防・電力会社が遮断作業を実施。避難困難な高齢者世帯が複数発生。現場は依然膝程度の冠水が続き、車両進入困難。	電気ブレーカーの早期遮断指導、避難支援班の迅速派遣、住民への感電・火災リスクの注意喚起、消防・電力会社・福祉部門の連携強化、現場状況の随時把握	平成25年台風18号時、同地域で床下浸水から分電盤浸水・感電事故寸前の事例あり。避難支援・安全指導の遅れで被害拡大した報告もある。	['床下浸水拡大による家財・電気設備被害', '感電・火災リスク', '要配慮者の避難遅延']	['冠水拡大による孤立世帯の発生', '下水逆流による衛生被害', '支援班・救助班の現場到着遅延']
		1-7	250	発災28分後	床下浸水が継続し、現場では下水道や排水口からの逆流・悪臭が発生している。住民から衛生面への不安の声や、生活支援物資の要望が自治体窓口に寄せられている。	住民	中町52番地付近の住民より『床下の水が引かず、トイレや排水口から水が逆流してきている。悪臭も強くなってきた。飲み水やトイレが心配で、どうしたらよいか』との相談が自治体窓口に入る。	現場は依然として道路に膝程度の冠水が残り、床下浸水も10〜15cm程度継続。住民の多くは自宅2階や高所で待機中。消防・電力会社には先行して連絡済み。	淀川から約250mの低地で住宅密集地。南側が窪地で水が集まりやすく、排水能力を超えると短時間で床下浸水・下水逆流が拡大しやすい。	浸水長期化時の衛生・生活支援（二次災害）対応、住民相談への適切な指導、現場・本部間の情報共有・多機関連携の実践訓練。	下水逆流・悪臭発生時の住民対応、衛生リスクへの早期注意喚起、生活支援物資の調達・配布準備、関係機関との連携強化。	住民への衛生被害防止策（手洗い・飲用水確保等）の周知、下水道管理部門への連絡、現場状況の継続把握、必要に応じて消毒・生活支援物資（飲料水・簡易トイレ等）の手配、避難所での受け入れ体制準備。	下水逆流による衛生被害拡大、住民の健康被害（感染症等）、生活物資の調達・配布遅延、複数機関間の情報共有の遅れ	道路は膝程度の冠水継続、床下10〜15cmの浸水、下水逆流発生・悪臭あり	床下浸水長期化・下水逆流・衛生被害懸念	床下浸水が継続する中、下水道や排水口からの逆流・悪臭が発生し、住民から衛生面の不安や生活支援物資の要望が高まっている。生活環境悪化・健康被害リスクが顕在化しつつある。	住民への衛生指導（手洗い・飲用水管理）、下水道管理部門との連携、簡易トイレ・飲料水等の生活支援物資の手配・配布、現場状況の継続把握と情報共有、避難所での衛生管理体制強化	平成25年台風18号時、同地域で床下浸水長期化による下水逆流・悪臭・感染症リスクが発生した事例あり。生活物資の配布遅延が住民の不安拡大につながった。	['床下浸水継続による家財・電気設備被害', '下水逆流による衛生被害・健康被害', '感電・火災リスク']	['冠水長期化による孤立世帯の発生', '感染症・生活環境悪化による体調不良者発生', '支援班・救助班の現場到着遅延']
		1-8	250	発災33分後	長引く床下浸水と下水逆流・悪臭の中、住民から飲料水や簡易トイレ等の生活支援物資の要請が複数自治体窓口に寄せられる。	住民	中町52番地付近の住民より『床下の水が引かず、トイレや排水口の逆流・悪臭も続いている。飲み水やトイレの備えが心配なので、支援物資を届けてほしい』との要請が複数寄せられている。	現場は依然として道路に膝程度の冠水が残り、床下浸水も10〜15cm程度継続。住民の多くは2階や高所で待機。消防・下水道管理部門には先行して連絡済み。要配慮者世帯も物資要請に含まれている。	淀川から約250mの低地で住宅密集地。南側が窪地で水が集まりやすく、排水能力を超えると短時間で床下浸水・下水逆流が拡大しやすい。要配慮者世帯も多い。	長期化する浸水・下水逆流時の生活支援物資ニーズ把握と、物資調達・配布体制の迅速な構築、現場・本部間および関係機関連携の実践訓練。	住民からの生活支援物資要請の受理・優先度判断、物資調達・配布ルートの確保、要配慮者世帯への個別対応、現場状況の継続把握と迅速な情報共有。	住民からの要請内容の詳細聴取、物資（飲料水・簡易トイレ等）の調達・搬送指示、要配慮者世帯リストとの突合・優先配布、消防・福祉・保健部門との連携、現場状況の継続的な把握・本部への即時報告。	物資調達・搬送の遅延、冠水による配布困難、要配慮者世帯への個別対応の遅れ、複数機関間の情報伝達の混乱、住民の不安拡大	道路は膝程度の冠水継続、床下10〜15cmの浸水、下水逆流・悪臭あり	床下浸水長期化・下水逆流・生活支援物資不足	床下浸水と下水逆流・悪臭が継続する中、住民から飲料水や簡易トイレなどの生活支援物資要請が複数発生。要配慮者世帯も含まれ、現場では物資不足・生活環境悪化への不安が拡大している。	生活支援物資（飲料水・簡易トイレ等）の迅速な調達・配布、要配慮者世帯への個別支援、下水道管理部門との連携強化、現場状況の逐次把握、避難所の衛生管理体制強化、住民への衛生指導	平成25年台風18号時、同地域で床下浸水長期化・下水逆流・生活物資不足が発生し、物資配布遅延が住民の不安拡大につながった事例あり。	['床下浸水継続による家財・電気設備被害', '下水逆流による衛生被害・健康被害', '感電・火災リスク']	['冠水長期化による孤立世帯の発生', '感染症・生活環境悪化による体調不良者発生', '支援班・救助班の現場到着遅延']
		1-9	250	発災38分後	床下浸水と下水逆流・悪臭の長期化により、現場で複数世帯の住民が体調不良（軽度の吐き気や頭痛）を訴え、保健師の派遣要請が自治体窓口に入る。	住民	中町52番地付近の住民より『床下の水が引かず、悪臭や下水逆流の影響で家族が吐き気や頭痛を訴えている。医療や保健師の方に確認に来てほしい』との要請が入った。	体調不良を訴えているのは高齢者と子どもを含む2世帯。現場は依然として道路に膝程度の冠水、床下10〜15cmの浸水、悪臭も強い。消防・下水道管理部門・福祉部門には先行して連絡済み。	淀川から約250mの低地で住宅密集地。南側が窪地で水が集まりやすく、排水能力を超えると短時間で床下浸水・下水逆流が拡大しやすい。要配慮者世帯も多い。	長期化する床下浸水・下水逆流等による衛生被害・体調不良発生時の医療・保健部門との連携、住民健康被害対応の初動訓練。	住民からの健康被害申告の受理、保健師・医療班の迅速な派遣判断、現場での健康状態確認・応急対応、要配慮者世帯への優先対応、関係機関連携の強化。	体調不良世帯のリストアップと現場への伝達、保健師・医療班の派遣指示、住民への衛生指導・健康被害防止策の再周知、消防・福祉・下水道管理部門との連携、現場状況の継続把握・本部への即時報告。	保健師・医療班の現場到着遅延、冠水によるアクセス困難、健康被害の見逃しや重症化、複数機関間の情報共有の遅れ、住民の不安拡大	道路は膝程度の冠水継続、床下10〜15cmの浸水、下水逆流・悪臭あり	床下浸水長期化・下水逆流・生活支援物資不足・健康被害発生	床下浸水と下水逆流・悪臭が継続し、住民の一部で吐き気や頭痛などの体調不良が発生。高齢者や子どもを含む世帯から医療的支援要請が入り、現場では生活環境悪化と健康被害リスクが顕在化している。	生活支援物資（飲料水・簡易トイレ等）の迅速な配布、保健師・医療班の派遣、住民への衛生・健康指導、下水道管理部門との連携強化、現場状況の逐次把握・情報共有、避難所の衛生管理体制強化	平成25年台風18号時、同地域で床下浸水長期化・下水逆流・生活物資不足・健康被害が発生し、医療班の派遣が遅れた事例あり。	['床下浸水継続による家財・電気設備被害', '下水逆流による衛生被害・健康被害（体調不良者発生）', '生活物資不足による住民の体調不良・不安拡大']	['冠水長期化による孤立世帯の発生', '感染症・生活環境悪化による体調不良者増加', '支援班・救助班・医療班の現場到着遅延']
		1-10	250	発災43分後	床下浸水・下水逆流・生活支援物資不足・健康被害が継続する中、現場に到着した保健師・医療班から、避難所への搬送が必要な体調不良者が複数確認されたとの報告が入る。	保健師（現場医療班）	現地に到着した保健師から『中町52番地南側の住宅で、床下浸水と悪臭が続く中、頭痛や吐き気を訴える高齢者2名と子ども1名が脱水症状も疑われる状態。徒歩での避難が難しいため、搬送支援を要請したい』との報告。	体調不良者は要配慮者リストに該当する高齢者世帯と、子どもを含む世帯。現場は依然として道路に膝程度の冠水、床下10〜15cmの浸水、悪臭も強い。消防・福祉・下水道管理部門には先行して連絡済み。	淀川から約250mの低地で住宅密集地。南側が窪地で水が集まりやすく、排水能力を超えると短時間で床下浸水・下水逆流が拡大しやすい。要配慮者世帯も多い。	長期化する浸水・下水逆流・生活支援物資不足・健康被害発生時の多機関連携による搬送支援、避難所での受け入れ体制の実践訓練。	現場医療班からの健康被害・搬送要請の受理、要配慮者・体調不良者の優先搬送判断、搬送手段（徒歩・ボート等）の選定、消防・福祉部門との連携、避難所での受け入れ準備。	体調不良者・要配慮者世帯のリストアップと現場への伝達、搬送手段の迅速な決定・派遣、消防・福祉部門との連携による搬送支援、避難所での健康管理体制強化、現場状況の継続的な把握・本部への即時報告。	冠水による搬送困難、搬送手段・人員の不足、避難所での健康管理・衛生体制の遅れ、複数機関間の連携・情報共有の遅延、住民の不安拡大	道路は膝程度の冠水継続、床下10〜15cmの浸水、下水逆流・悪臭あり	床下浸水長期化・下水逆流・生活支援物資不足・健康被害重症化・避難困難	床下浸水と下水逆流・悪臭が継続し、住民の一部で頭痛や吐き気、脱水症状などの体調不良が重症化。高齢者や子どもを含む複数世帯で自力避難困難となり、医療班から搬送支援要請が入る。現場は冠水・浸水・悪臭が継続し、住民のストレスと健康被害リスクが高まっている。	体調不良者・要配慮者の優先搬送体制の強化、搬送手段（ボート・高床車等）の確保、保健師・医療班・消防・福祉部門の連携強化、避難所での健康管理・衛生体制の徹底、生活支援物資の迅速な配布・現場状況の逐次把握	平成25年台風18号時、同地域で床下浸水・下水逆流・生活物資不足・健康被害重症化・搬送困難事例が発生。医療班・救助班の派遣が遅れ、住民の不安・体調悪化が拡大した事例あり。	['床下浸水継続による家財・電気設備被害', '下水逆流による衛生被害・健康被害（体調不良者重症化）', '生活物資不足による住民の体調不良・不安拡大', '搬送困難による重症化リスク']	['感染症・生活環境悪化による体調不良者発生', '孤立世帯の発生', '感電・火災リスク', '支援班・救助班・医療班の現場到着遅延']
		1-11	250	発災49分後	床下浸水・下水逆流・悪臭・健康被害・避難困難が継続する中、消防・保健・福祉・医療班・ボランティアが連携し、体調不良者・要配慮者の搬送と現場の生活支援・衛生指導を同時進行で実施。避難所の受け入れ体制強化と追加物資搬送も必要となる。	消防	消防隊より『中町52番地南側の床下浸水エリアで、先ほど搬送支援を要請した高齢者・子ども世帯のほか、追加で1世帯（高齢者単身）からも体調不良（発熱・倦怠感）による搬送希望が入った。現場は膝程度の冠水が続き、悪臭も強い。物資到着と避難所受け入れ状況の確認も要請したい』との報告。	追加の搬送希望は南側窪地の高齢者単身世帯。現場には消防・保健師・福祉担当が集結中。避難所には先に搬送した住民が到着済みだが、受け入れスペースが残り少ない。飲料水や簡易トイレの追加搬送も必要。	淀川から約250mの低地で住宅密集地。南側が窪地で水が集まりやすく、排水能力を超えると短時間で床下浸水・下水逆流・健康被害が拡大しやすい。要配慮者世帯も多い。	複数要配慮者・体調不良者発生時の搬送・生活支援・衛生管理体制の強化、現場と避難所・本部間の連絡調整、多機関連携の実践訓練。	追加の体調不良者・要配慮者搬送要請への迅速対応、消防・保健・福祉・ボランティアの現場連携、避難所受け入れ調整、生活支援物資の追加搬送指示、衛生・健康リスクの再周知。	追加搬送希望世帯のリストアップ・現場伝達、消防・保健・福祉・ボランティア班の応援派遣、搬送手段（徒歩・ボート等）の再確認、避難所受け入れ体制の拡充・健康管理強化、生活支援物資（飲料水・簡易トイレ等）の追加手配・搬送、住民への衛生指導・健康注意喚起の再徹底、現場・避難所・本部間の情報共有。	搬送希望者・体調不良者の増加による対応遅延、避難所受け入れスペース・物資不足、搬送手段・人員の不足、現場・避難所間の情報伝達混乱、住民の不安・パニック拡大	道路は膝程度の冠水継続、床下10〜15cmの浸水、下水逆流・悪臭あり	床下浸水長期化・下水逆流・生活支援物資不足・健康被害拡大・避難困難	床下浸水と下水逆流・悪臭が継続し、住民の一部で体調不良（発熱・倦怠感・吐き気・脱水症状など）が拡大。高齢者や子どもを含む世帯で自力避難困難例が増加し、搬送・生活支援・衛生管理体制の強化が必要。避難所の受け入れスペースや物資も逼迫し始めている。	体調不良者・要配慮者の優先搬送体制強化、搬送手段（ボート・高床車等）の確保、保健師・医療班・消防・福祉・ボランティアの連携強化、避難所の健康管理・衛生体制徹底、生活支援物資（飲料水・簡易トイレ等）の追加搬送、現場・避難所・本部間の情報共有徹底	平成25年台風18号時、同地域で床下浸水・下水逆流・生活物資不足・健康被害重症化・搬送困難事例が発生。医療班・救助班の派遣が遅れ、住民の不安・体調悪化が拡大した事例あり。	['床下浸水継続による家財・電気設備被害', '下水逆流による衛生被害・健康被害（体調不良者増加）', '生活物資不足による住民の体調不良・不安拡大', '搬送困難による重症化リスク']	['感染症・生活環境悪化による体調不良者発生', '孤立世帯の発生', '感電・火災リスク', '支援班・救助班・医療班の現場到着遅延']
		1-12	250	発災54分後	避難所の受け入れ余力が限界に近づき、追加の体調不良者・要配慮者への搬送・生活支援・衛生管理が求められる中、臨時のサテライト避難所開設の検討指示が本部から出される。	行政（本部）	本部より『中町52番地南側の床下浸水・下水逆流エリアで、既存避難所が満員に近づいている。追加の避難希望者や体調不良者の一時待機場所として、近隣公共施設等を臨時避難所（サテライト避難所）として開設する準備を進めてほしい』との指示が現場班に入った。	既存避難所は高齢者・体調不良者で満杯。現場は膝程度の冠水、床下10〜15cmの浸水、下水逆流・悪臭が継続。サテライト避難所候補は町内会館や学校体育館など。避難希望世帯や要配慮者のリストアップが進行中。	淀川から約250mの低地で住宅密集地。南側が窪地で水が集まりやすく、排水能力を超えると短時間で床下浸水・下水逆流・健康被害が拡大。要配慮者世帯が多く、避難所の逼迫リスクが高い。	避難所過密・健康被害拡大時の臨時避難所開設判断・現場運用・住民誘導の実践訓練。多機関連携と情報共有の強化を狙う。	避難所過密時の臨時避難所設置判断、現場・本部・関係機関の調整、住民・要配慮者の安全確保、避難誘導・物資搬送・衛生管理体制の迅速構築。	サテライト避難所候補の現地確認・開設指示、避難誘導班・物資搬送班の編成と派遣、現場本部・既存避難所・関係機関（消防・警察・保健・福祉・ボランティア）との連携、住民・要配慮者リストの再整理と優先搬送、衛生・健康管理体制の確立、住民への広報・安全指導。	避難所過密による受け入れ遅延、臨時避難所開設準備の遅れ、物資・人員不足、住民の不安・混乱拡大、現場・本部間の情報伝達遅延、複数機関連携の混乱	道路は膝程度の冠水継続、床下10〜15cmの浸水、下水逆流・悪臭あり	床下浸水長期化・下水逆流・健康被害拡大・避難所過密・臨時避難所開設指示	床下浸水と下水逆流・悪臭が継続し、住民の一部で健康被害が拡大。既存避難所は満員となり、追加の避難希望・体調不良者対応のため、臨時避難所開設の判断・準備が必要となっている。現場は冠水・浸水・悪臭が継続し、住民の不安と健康リスクがさらに高まっている。	サテライト避難所の迅速な開設・運用、避難誘導・物資搬送班の強化、現場本部・既存避難所・関係機関との連携、要配慮者名簿の活用と優先救助・搬送、衛生・健康管理体制の確立、現場・本部間の情報共有徹底、住民への広報・安全指導の徹底	平成25年台風18号時、同地域で床下浸水・避難所過密・臨時避難所開設が必要となった事例あり。物資・人員不足や情報共有遅延による混乱が生じた。	['床下浸水継続による家財・電気設備被害', '下水逆流による衛生被害・健康被害（体調不良者増加）', '生活物資不足による住民の体調不良・不安拡大', '避難所過密・受け入れ遅延']	['感染症・生活環境悪化による体調不良者増加', '孤立世帯の発生', '感電・火災リスク', '臨時避難所開設準備の遅れ・混乱']
		1-13	250	発災58分後	サテライト避難所（臨時避難所）の開設準備が進み、避難誘導・物資搬送・健康管理班が現場へ派遣される。既存避難所・臨時避難所間の住民搬送や体調不良者・要配慮者への優先対応、物資配布体制の現場オペレーションが本格化する。	現場班（避難誘導・物資搬送・保健師）	中町52番地南側の床下浸水・下水逆流エリアにて、避難誘導班・物資搬送班・保健師班が現場に到着。既存避難所からの追加搬送希望者や要配慮者のリストアップを進めつつ、飲料水・簡易トイレ・衛生資材などの物資配布を開始。健康状態のチェックや避難所間の連絡も並行して実施している。	既存避難所は満員状態で、サテライト避難所（町内会館や学校体育館等）への住民誘導が本格化。搬送には徒歩・ボートを併用。保健師は健康相談・感染症予防指導も担当。現場と本部・避難所間の情報共有は無線・携帯で実施。	淀川から約250mの低地で住宅密集地。南側が窪地となっており、水が集まりやすい。都市型排水能力を超えた状態が長期化しやすく、要配慮者世帯も多い。	臨時避難所運用下での多機関連携による避難誘導・物資搬送・健康管理体制の構築訓練。住民安全確保・衛生管理・優先順位判断・情報共有の強化を狙う。	避難所・サテライト避難所間の搬送・物資配布・健康管理の現場オペレーション、要配慮者・体調不良者の優先対応、複数部門連携の実践、現場と本部・避難所間の情報共有迅速化。	避難誘導・搬送班の現場展開、要配慮者・体調不良者リストの再整理・優先搬送、物資（飲料水・トイレ・衛生資材等）のサテライト避難所搬送・配布、保健師による健康チェック・感染症予防指導、現場と本部・避難所間の情報共有体制強化。	搬送・物資配布の遅延、搬送希望者の増加による現場混乱、要配慮者・体調不良者の個別対応の遅れ、複数機関間の調整・情報伝達の混乱、住民の不安拡大、夜間対応や停電時の活動困難	道路は膝程度の冠水継続、床下10〜15cmの浸水、下水逆流・悪臭あり	床下浸水長期化・下水逆流・健康被害拡大・避難所過密・臨時避難所運用・多機関連携搬送・物資配布	床下浸水と下水逆流・悪臭が継続し、住民の一部で健康被害が拡大。既存避難所は満員、サテライト避難所への搬送・物資配布・健康管理が本格化。複数部門（避難誘導・物資搬送・保健師）が連携し、住民安全確保・衛生管理・優先搬送に取り組む現場運用が進む。	サテライト避難所の迅速な運用、避難誘導・物資搬送・健康管理班の現場展開・連携、要配慮者名簿の活用と優先救助・搬送、衛生・健康管理体制の確立、現場・本部・避難所間の情報共有徹底、住民への広報・安全指導の徹底	平成25年台風18号時、同地域で床下浸水・避難所過密・臨時避難所開設・多機関連携搬送・物資配布が必要となった事例あり。物資・人員不足や情報共有遅延による混乱が生じた。	['床下浸水継続による家財・電気設備被害', '下水逆流による衛生被害・健康被害（体調不良者増加）', '生活物資不足による住民の体調不良・不安拡大', '避難所過密・受け入れ遅延']	['感染症・生活環境悪化による体調不良者増加', '孤立世帯の発生', '感電・火災リスク', '臨時避難所運用・物資配布の遅延・混乱']
		1-14	250	発災63分後	サテライト避難所の本格稼働に伴い、既存避難所・臨時避難所間での高齢者や体調不良者の優先搬送、医療物資の再配分調整が必要となる。	現場班（避難誘導・物資搬送・保健師）	楠葉中町52番地周辺のサテライト避難所・既存避難所の双方で、体調不良者や高齢者の増加に伴い、解熱剤や消毒液、簡易ベッドなどの医療物資が不足し始めたとの現場報告。避難所間での物資再配分と、体調不良者の優先搬送・健康チェックが求められている。	避難所間の連絡は無線と携帯を併用。既存避難所・サテライト避難所ともに収容数が限界に近く、今後も追加搬送希望者が見込まれる。保健師は健康相談・感染症予防指導も担当。	淀川から約250mの低地で住宅密集地。南側が窪地となっており、水が集まりやすい。都市型排水能力を超えた状態が長期化しやすく、要配慮者世帯も多い。	複数避難所運用下での医療・物資・人員配分の現場調整、多機関連携による健康被害抑制・優先順位判断・情報共有の実践力向上を狙う。	避難所間の物資・人員調整、体調不良者・高齢者の優先搬送・健康管理、現場班・本部・医療機関との情報共有・連携強化、住民安全確保・衛生維持。	医療物資・衛生資材の優先搬送、体調不良者・高齢者リストの再整理と優先搬送、保健師・医療スタッフの現場展開、避難所間・本部との情報共有、住民健康状態の把握・健康相談体制強化、関係機関（保健・福祉・医療・ボランティア）との連携調整。	医療物資・スタッフ不足、避難所間搬送・調整の遅延、健康被害拡大への即応困難、住民不安・混乱拡大、夜間・停電下での応急対応困難、複数機関連携の調整遅延	道路は膝程度の冠水継続、床下10〜15cmの浸水、下水逆流・悪臭あり	床下浸水長期化・下水逆流・健康被害拡大・避難所過密・臨時避難所運用・医療資源逼迫	床下浸水と下水逆流・悪臭が継続し、住民の一部で健康被害が拡大。既存避難所・サテライト避難所ともに満員に近く、医療スタッフ・医薬品の不足が深刻化。高齢者や体調不良者の優先搬送・健康管理、避難所間での医療物資再配分調整が必要となり、現場対応が逼迫している。	サテライト避難所の迅速な運用、避難誘導・物資搬送・健康管理班の現場展開強化、要配慮者名簿の活用と優先救助・搬送、衛生・健康管理体制の確立、現場・本部・避難所間の情報共有徹底、住民への広報・安全指導の徹底、医療機関との連携強化	平成25年台風18号時、同地域で床下浸水・避難所過密・臨時避難所開設・医療応援要請が必要となった事例あり。物資・人員不足や情報共有遅延による混乱が生じた。	['床下浸水継続による家財・電気設備被害', '下水逆流による衛生被害・健康被害（体調不良者増加）', '生活物資不足による住民の体調不良・不安拡大', '避難所過密・受け入れ遅延']	['感染症・生活環境悪化による体調不良者増加', '孤立世帯の発生', '感電・火災リスク', '臨時避難所運用・物資配布の遅延・混乱']
		1-15	250	発災68分後	夜間対応のための照明・発電機の不足が現場班より報告され、サテライト避難所・既存避難所間での住民安否確認や夜間巡回体制の強化が求められている。	現場班（避難誘導・物資搬送・保健師）	楠葉中町52番地南側のサテライト避難所・既存避難所双方で、夜間に備えた照明や発電機が不足しており、夜間の住民安否確認や体調急変時の対応に不安があるとの現場報告。夜間巡回班の追加派遣や、照明器具・発電機の緊急搬送が必要との要請が入った。	現場は膝程度の冠水、床下10〜15cmの浸水、下水逆流・悪臭が継続。避難所・サテライト避難所ともに満員に近く、夜間対応人員も限られている。高齢者・要配慮者世帯が多く、夜間の体調急変や転倒リスクも懸念される。	淀川から約250mの低地で住宅密集地。南側が窪地となっており、水が集まりやすい。都市型排水能力を超えた状態が長期化しやすく、要配慮者世帯も多い。	夜間・停電時の避難所運営、現場安全管理、住民安否確認体制の実践訓練。多機関連携による夜間対応力と情報共有の強化を狙う。	夜間の照明・電源確保、避難所間・現場での住民安否確認、要配慮者・高齢者の夜間見守り体制、現場班・本部・関係機関間の連携強化。	照明器具・発電機の追加手配と搬送、夜間巡回班の編成・現場展開、避難所・現場での住民安否確認・体調チェック、関係機関（保健・福祉・ボランティア）との連携、夜間連絡体制の再確認。	照明・電源不足による安全確保困難、夜間巡回の人員不足、住民の体調急変・転倒事故の発見遅延、複数機関間での夜間情報共有の遅れ、住民不安の拡大	道路は膝程度の冠水継続、床下10〜15cmの浸水、下水逆流・悪臭あり	床下浸水長期化・下水逆流・健康被害拡大・避難所過密・夜間対応・照明電源不足	床下浸水と下水逆流・悪臭が継続し、夜間に備えた照明・発電機の不足が顕在化。夜間の住民安否確認や体調急変への対応体制が求められ、現場の安全確保が課題となっている。	夜間対応用照明・発電機の事前備蓄・迅速搬送、巡回班の夜間配置、要配慮者・高齢者見守り体制の強化、現場・本部・避難所間の夜間連絡体制徹底、住民への安全指導・体調急変時の連絡方法周知	平成25年台風18号時、同地域で夜間の照明・発電機不足、避難所・現場での安否確認遅延、体調急変時の発見遅れが報告されている。	['床下浸水継続による家財・電気設備被害', '下水逆流による衛生被害・健康被害（体調不良者発生）', '生活物資不足による住民の体調不良・不安拡大', '夜間・停電下での事故・体調急変の発見遅延', '避難所過密・受け入れ遅延', '医療資源逼迫による健康被害拡大']	['冠水長期化による孤立世帯の発生', '感染症・生活環境悪化による体調不良者増加', '支援班・救助班・医療班・救急隊の現場到着遅延', '臨時避難所運用・物資配布の遅延・混乱', '夜間対応困難による住民不安の拡大']
		1-16	250	発災72分後	避難所・サテライト避難所双方で体調不良者・高齢者の増加に伴い、医療スタッフ・医薬品の追加手配や優先搬送、夜間の健康相談体制の強化が求められている。	本部（医療調整班）	『避難所・サテライト避難所で体調不良者や高齢者の増加により、応急手当や健康管理のための医療スタッフ・医薬品が不足している。搬送希望者も増加しており、追加の人員や物資搬送車両の派遣が必要』との現場からの報告が本部に相次いで入っている。	搬送希望者リストが増加し、保健師・医療スタッフの現場展開が追いついていない。追加物資の搬送車両も不足し、夜間対応のため照明・発電機も不足気味。	淀川から約250mの低地で住宅密集地。南側が窪地で水が集まりやすく、都市型排水能力を超えた状態が長期化しやすい。要配慮者世帯も多い。	夜間・医療資源逼迫時の多機関連携による応急対応・物資搬送・健康管理の現場調整訓練。優先順位判断・現場調整力・情報共有力の強化を狙う。	避難所間の医療物資・スタッフ調整、体調不良者・高齢者の優先搬送、現場班・本部・医療機関の情報共有・調整、住民健康管理と衛生維持。	医療スタッフの追加派遣・調整、医薬品・衛生資材の優先搬送、夜間対応用照明・発電機の迅速手配、避難所間の連絡・情報共有、体調不良者・高齢者リストの再整理と優先搬送、健康相談体制の強化、関係機関（保健・福祉・医療・ボランティア）との連携強化。	医療スタッフ・物資不足、搬送・調整の遅延、健康被害拡大への即応困難、住民不安・混乱拡大、夜間・停電下での応急対応困難、複数機関連携の調整遅延	道路は膝程度の冠水継続、床下10〜15cmの浸水、下水逆流・悪臭あり	床下浸水長期化・下水逆流・健康被害拡大・避難所過密・医療資源逼迫・夜間対応	床下浸水と下水逆流・悪臭が継続し、避難所・サテライト避難所双方で体調不良者・高齢者が増加。医療スタッフ・医薬品の不足が深刻化し、夜間対応や健康相談体制の強化が急務となっている。現場の搬送・物資調整と夜間対応の実践が求められる。	医療スタッフ・医薬品・照明機器の事前備蓄・迅速搬送、夜間巡回班の配置強化、要配慮者・高齢者見守り体制の徹底、現場・本部・避難所間の情報共有体制強化、住民への健康・安全指導・体調急変時の連絡方法周知、医療機関・ボランティアとの連携強化	平成25年台風18号時、同地域で夜間の照明・発電機・医療資源不足、避難所・現場での安否確認遅延、体調急変時の発見遅れや搬送困難が報告されている。	['床下浸水継続による家財・電気設備被害', '下水逆流による衛生被害・健康被害（体調不良者発生）', '生活物資不足による住民の体調不良・不安拡大', '夜間・停電下での事故・体調急変の発見遅延', '避難所過密・受け入れ遅延', '医療資源逼迫による健康被害拡大']	['冠水長期化による孤立世帯の発生', '感染症・生活環境悪化による体調不良者増加', '支援班・救助班・医療班・救急隊の現場到着遅延', '臨時避難所運用・物資配布の遅延・混乱', '夜間対応困難による住民不安の拡大']
		1-17	250	発災80分後	避難所・サテライト避難所での体調不良者・高齢者の増加が継続し、追加の医療スタッフ・医薬品・搬送車両の手配、夜間対応体制の再点検、現場班・本部・関係機関間の優先順位付けと調整が求められる。	本部（医療・現場調整班）	『避難所・サテライト避難所で体調不良者や高齢者の増加が続き、応急手当や健康管理のための医療スタッフ・医薬品・搬送車両が引き続き不足している。夜間対応のため照明・発電機の追加手配も必要。現場班・本部・関係機関で優先順位を再確認し、搬送・応急対応の調整を強化する必要あり』との報告。	搬送希望者リストは増加傾向。夜間対応のための照明・発電機は一部現場に到着済みだが、全避難所への配備は未了。医療スタッフ・保健師の現場展開も継続的に調整中。	淀川から約250mの低地で住宅密集地。南側が窪地で水が集まりやすく、都市型排水能力を超えた状態が長期化しやすい。要配慮者世帯も多い。	医療資源逼迫・夜間対応下での多機関連携による優先順位判断・現場調整・情報共有の徹底訓練。現場主導による応急対応力・調整力の強化を狙う。	医療物資・スタッフ・搬送車両の追加手配と現場調整、夜間対応体制の再点検、優先順位判断・情報共有の徹底、住民健康管理と安全維持。※現場リーダーによる判断・調整力がポイント	医療スタッフ・医薬品・搬送車両・照明機器・発電機の追加手配、体調不良者・高齢者リストの再整理と優先搬送、現場班と本部・関係機関（保健・福祉・医療・ボランティア）との連携強化、夜間の安全確保・健康相談体制の強化、住民への健康・安全指導の再徹底。	医療スタッフ・物資・搬送車両の不足、夜間・停電下での応急対応困難、優先順位判断の混乱、住民不安・混乱拡大、複数機関連携の調整遅延、体調急変や事故への即応困難	道路は膝程度の冠水継続、床下10〜15cmの浸水、下水逆流・悪臭あり	床下浸水長期化・下水逆流・健康被害拡大・避難所過密・医療資源逼迫・夜間対応	床下浸水と下水逆流・悪臭が継続し、避難所・サテライト避難所双方で体調不良者・高齢者が増加。医療スタッフ・医薬品・搬送車両の不足が深刻化し、夜間対応や健康相談体制の強化が急務となっている。現場の搬送・物資調整と夜間対応の実践が求められる。	医療スタッフ・医薬品・照明機器の事前備蓄・迅速搬送、夜間巡回班の配置強化、要配慮者・高齢者見守り体制の徹底、現場・本部・避難所間の情報共有体制強化、住民への健康・安全指導・体調急変時の連絡方法周知、医療機関・ボランティアとの連携強化	平成25年台風18号時、同地域で夜間の照明・発電機・医療資源不足、避難所・現場での安否確認遅延、体調急変時の発見遅れや搬送困難が報告されている。	['床下浸水継続による家財・電気設備被害', '下水逆流による衛生被害・健康被害（体調不良者発生）', '生活物資不足による住民の体調不良・不安拡大', '夜間・停電下での事故・体調急変の発見遅延', '避難所過密・受け入れ遅延', '医療資源逼迫による健康被害拡大']	['冠水長期化による孤立世帯の発生', '感染症・生活環境悪化による体調不良者増加', '支援班・救助班・医療班・救急隊の現場到着遅延', '臨時避難所運用・物資配布の遅延・混乱', '夜間対応困難による住民不安の拡大']
		1-18	250	発災84分後	避難所・サテライト避難所での体調不良者・高齢者の増加が継続し、優先搬送や夜間対応体制の維持、資機材・人員の追加手配と現場調整の徹底が引き続き求められている。	本部（医療・現場調整班）	『避難所・サテライト避難所で体調不良者や高齢者の搬送希望が続いている。夜間対応のための照明・発電機・医療スタッフ・搬送車両の追加配備状況を現場班から報告し、優先順位を再確認のうえ、応急対応の調整を継続する』との本部指示が現場へ発信された。	照明・発電機・医療スタッフは一部現場到着済みだが、全避難所への配備は未了。追加搬送希望者リストは増加傾向。現場班・本部・関係機関間で優先順位判断と調整が継続中。	淀川から約250mの低地で住宅密集地。南側が窪地で水が集まりやすく、都市型排水能力を超えた状態が長期化しやすい。要配慮者世帯も多い。	医療資源逼迫・夜間対応下での現場と本部・関係機関の優先順位判断・応急対応体制の徹底訓練。現場主導による調整力・情報共有力の強化を狙う。	医療物資・スタッフ・搬送車両・照明機器の追加手配、優先順位判断・現場調整、夜間安全管理、現場リーダー・本部・関係機関の連携強化。	現場班から最新の搬送希望者・体調不良者リストと資機材配備状況を本部へ即時報告、優先順位を本部と協議し応急対応を再指示、追加資機材（医療・照明・搬送）の手配、夜間巡回班の再編成、住民への健康・安全指導の徹底。	医療スタッフ・物資・搬送車両・照明機器の不足、夜間・停電下での応急対応困難、優先順位判断の混乱、現場と本部・関係機関間の情報伝達遅延、住民不安・混乱拡大、体調急変や事故への即応困難	道路は膝程度の冠水継続、床下10〜15cmの浸水、下水逆流・悪臭あり	床下浸水長期化・下水逆流・健康被害拡大・避難所過密・医療資源逼迫・夜間対応	床下浸水と下水逆流・悪臭が継続し、避難所・サテライト避難所双方で体調不良者・高齢者が増加。医療スタッフ・医薬品・搬送車両の不足が深刻化し、夜間対応や健康相談体制の強化が急務となっている。現場の搬送・物資調整と夜間対応の実践が引き続き求められる。	医療スタッフ・医薬品・照明機器の事前備蓄・迅速搬送、夜間巡回班の配置強化、要配慮者・高齢者見守り体制の徹底、現場・本部・避難所間の情報共有体制強化、住民への健康・安全指導・体調急変時の連絡方法周知、医療機関・ボランティアとの連携強化	平成25年台風18号時、同地域で夜間の照明・発電機・医療資源不足、避難所・現場での安否確認遅延、体調急変時の発見遅れや搬送困難が報告されている。	['床下浸水継続による家財・電気設備被害', '下水逆流による衛生被害・健康被害（体調不良者発生）', '生活物資不足による住民の体調不良・不安拡大', '夜間・停電下での事故・体調急変の発見遅延', '避難所過密・受け入れ遅延', '医療資源逼迫による健康被害拡大']	['冠水長期化による孤立世帯の発生', '感染症・生活環境悪化による体調不良者増加', '支援班・救助班・医療班・救急隊の現場到着遅延', '臨時避難所運用・物資配布の遅延・混乱', '夜間対応困難による住民不安の拡大']
		1-19	250	発災89分後	避難所・サテライト避難所での体調不良者・高齢者の搬送希望がさらに増加し、夜間対応体制の再点検と応急対応の優先順位確認のため、現場班・本部・関係機関による夜間緊急ミーティングが開催される。	本部（現場調整班）	『避難所・サテライト避難所で体調不良者や高齢者の搬送希望がさらに増加している。夜間対応のための照明・発電機・医療スタッフ・搬送車両の配備状況を現場班から至急報告し、応急対応の優先順位を再確認するため、現場班・本部・関係機関の夜間緊急ミーティングを開催する』との連絡が本部から現場班に入った。	照明・発電機は一部現場に到着済みだが、全避難所への配備は未了。医療スタッフ・保健師の現場展開も調整中。搬送希望者リストは増加傾向。現場と本部・関係機関の連携が重要となっている。	淀川から約250mの低地で住宅密集地。南側が窪地で水が集まりやすく、都市型排水能力を超えた状態が長期化しやすい。要配慮者世帯も多い。	医療資源逼迫・夜間対応下での現場と本部・関係機関の優先順位判断・情報共有・応急対応体制強化を訓練する。	現場リーダー・本部・関係機関による情報共有と優先順位判断、医療スタッフ・照明機器・搬送車両の追加手配状況の把握、夜間の応急対応体制の再構築。	現場班から最新の搬送希望者・体調不良者リストと資機材配備状況を本部へ即時報告、緊急会議で優先順位を協議し応急対応を再指示、医療・照明・搬送資機材の追加手配、夜間巡回班の再編成、住民への健康・安全指導の徹底。	医療スタッフ・物資・搬送車両・照明機器の不足、夜間・停電下での応急対応困難、優先順位判断の混乱、現場と本部・関係機関間の情報伝達遅延、住民不安・混乱拡大、体調急変や事故への即応困難	道路は膝程度の冠水継続、床下10〜15cmの浸水、下水逆流・悪臭あり	床下浸水長期化・下水逆流・健康被害拡大・避難所過密・医療資源逼迫・夜間対応	床下浸水と下水逆流・悪臭が継続し、避難所・サテライト避難所双方で体調不良者・高齢者が増加。医療スタッフ・医薬品・搬送車両の不足が深刻化し、夜間対応や健康相談体制の強化が急務となっている。現場の搬送・物資調整と夜間対応の実践が引き続き求められる。	医療スタッフ・医薬品・照明機器の事前備蓄・迅速搬送、夜間巡回班の配置強化、要配慮者・高齢者見守り体制の徹底、現場・本部・避難所間の情報共有体制強化、住民への健康・安全指導・体調急変時の連絡方法周知、医療機関・ボランティアとの連携強化	平成25年台風18号時、同地域で夜間の照明・発電機・医療資源不足、避難所・現場での安否確認遅延、体調急変時の発見遅れや搬送困難が報告されている。	['床下浸水継続による家財・電気設備被害', '下水逆流による衛生被害・健康被害（体調不良者発生）', '生活物資不足による住民の体調不良・不安拡大', '夜間・停電下での事故・体調急変の発見遅延', '避難所過密・受け入れ遅延', '医療資源逼迫による健康被害拡大']	['冠水長期化による孤立世帯の発生', '感染症・生活環境悪化による体調不良者増加', '支援班・救助班・医療班・救急隊の現場到着遅延', '臨時避難所運用・物資配布の遅延・混乱', '夜間対応困難による住民不安の拡大']
		1-20	250	発災94分後	夜間対応が続く中、避難所・サテライト避難所で体調不良者・高齢者の健康観察および夜間巡回を強化。現場班からは新たな急変者は出ていないが、搬送希望者リストがさらに増加し、照明・発電機のバッテリー残量低下が一部現場で報告されている。	現場班（避難誘導・医療・保健師）	『避難所・サテライト避難所で体調不良者や高齢者の健康観察と夜間巡回を継続中。新たな急変者は現時点で発生していないが、搬送希望者リストが増加傾向。照明・発電機も一部現場でバッテリー残量が低下し始めており、追加手配が必要』との報告。	夜間で気温が低下傾向。健康相談・応急手当のニーズが高く、医療スタッフ・保健師の現場展開が継続中。搬送希望者の優先順位付けは本部と連携して実施。	淀川から約250mの低地で住宅密集地。南側が窪地で水が集まりやすく、都市型排水能力を超えた状態が長期化しやすい。要配慮者世帯も多い。	夜間・医療資源逼迫下での現場主導による健康観察・搬送調整・資機材管理体制の徹底訓練。住民の体調急変・安全確保、現場と本部・関係機関の連携強化を狙う。	夜間健康観察・巡回体制の維持、搬送希望者の優先順位付け、照明・発電機等の資機材管理・追加手配、現場と本部・関係機関の迅速な情報共有。※現場リーダーの判断・調整力がポイント	現場班による定時の健康観察・夜間巡回、搬送希望者リストの本部共有と優先順位付け、照明・発電機のバッテリー点検・追加手配、急変時の応急対応準備、住民への健康・安全指導、現場と本部・関係機関の情報共有体制強化。	医療スタッフ・資機材の不足、夜間・停電下での健康観察・応急対応の困難、搬送希望者の増加による調整遅延、現場と本部・関係機関間の情報伝達遅延、住民不安・混乱拡大、体調急変や事故への即応困難	道路は膝程度の冠水継続、床下10〜15cmの浸水、下水逆流・悪臭あり	床下浸水長期化・下水逆流・健康被害拡大・避難所過密・医療資源逼迫・夜間対応	床下浸水と下水逆流・悪臭が継続し、避難所・サテライト避難所双方で体調不良者・高齢者が増加。医療スタッフ・医薬品・搬送車両の不足が深刻化し、夜間対応や健康相談体制の強化が急務となっている。現場の搬送・物資調整と夜間対応の実践が引き続き求められる。	医療スタッフ・医薬品・照明機器の事前備蓄・迅速搬送、夜間巡回班の配置強化、要配慮者・高齢者見守り体制の徹底、現場・本部・避難所間の情報共有体制強化、住民への健康・安全指導・体調急変時の連絡方法周知、医療機関・ボランティアとの連携強化	平成25年台風18号時、同地域で夜間の照明・発電機・医療資源不足、避難所・現場での安否確認遅延、体調急変時の発見遅れや搬送困難が報告されている。	['床下浸水継続による家財・電気設備被害', '下水逆流による衛生被害・健康被害（体調不良者発生）', '生活物資不足による住民の体調不良・不安拡大', '夜間・停電下での事故・体調急変の発見遅延', '避難所過密・受け入れ遅延', '医療資源逼迫による健康被害拡大']	['冠水長期化による孤立世帯の発生', '感染症・生活環境悪化による体調不良者増加', '支援班・救助班・医療班・救急隊の現場到着遅延', '臨時避難所運用・物資配布の遅延・混乱', '夜間対応困難による住民不安の拡大']
		1-21	250	発災97分後	夜間対応が継続する中、避難所・サテライト避難所で体調不良者・高齢者の健康観察と夜間巡回、照明・発電機のバッテリー残量確認、搬送希望者リストの優先順位付けが求められている。	現場班（避難誘導・保健師）	『避難所・サテライト避難所で体調不良者や高齢者の健康観察、夜間巡回を継続中。新たな急変者は現時点で発生していないが、搬送希望者リストがさらに増加。照明・発電機のバッテリー残量が低下し始めている現場があり、追加手配も必要』との報告が本部に入っている。	夜間で気温が低下傾向。健康相談・応急手当のニーズが高く、医療スタッフ・保健師の現場展開が継続中。搬送希望者の優先順位付けは本部と連携して実施。照明・発電機のバッテリー残量が心配な現場もある。	淀川から約250mの低地で住宅密集地。南側が窪地で水が集まりやすく、都市型排水能力を超えた状態が長期化しやすい。要配慮者世帯も多い。	夜間・医療資源逼迫下での現場主導による健康観察・搬送調整・資機材管理体制の徹底訓練。住民の体調急変・安全確保、現場と本部・関係機関の連携強化を狙う。	夜間健康観察・巡回体制の維持、搬送希望者の優先順位付け、照明・発電機等の資機材管理・追加手配、現場と本部・関係機関の迅速な情報共有。現場リーダーの判断・調整力がポイント。	現場班による定時の健康観察・夜間巡回、搬送希望者リストの本部共有と優先順位付け、照明・発電機のバッテリー点検・追加手配、急変時の応急対応準備、住民への健康・安全指導、現場と本部・関係機関の情報共有体制強化。	医療スタッフ・資機材の不足、夜間・停電下での健康観察・応急対応の困難、搬送希望者の増加による調整遅延、現場と本部・関係機関間の情報伝達遅延、住民不安・混乱拡大、体調急変や事故への即応困難	道路は膝程度の冠水継続、床下10〜15cmの浸水、下水逆流・悪臭あり	床下浸水長期化・下水逆流・健康被害拡大・避難所過密・医療資源逼迫・夜間対応	床下浸水と下水逆流・悪臭が継続し、避難所・サテライト避難所双方で体調不良者・高齢者が増加。医療スタッフ・医薬品・搬送車両の不足が深刻化し、夜間対応や健康相談体制の強化が急務となっている。現場の搬送・物資調整と夜間対応の実践が引き続き求められる。	医療スタッフ・医薬品・照明機器の事前備蓄・迅速搬送、夜間巡回班の配置強化、要配慮者・高齢者見守り体制の徹底、現場・本部・避難所間の情報共有体制強化、住民への健康・安全指導・体調急変時の連絡方法周知、医療機関・ボランティアとの連携強化	平成25年台風18号時、同地域で夜間の照明・発電機・医療資源不足、避難所・現場での安否確認遅延、体調急変時の発見遅れや搬送困難が報告されている。	['床下浸水継続による家財・電気設備被害', '下水逆流による衛生被害・健康被害（体調不良者発生）', '生活物資不足による住民の体調不良・不安拡大', '夜間・停電下での事故・体調急変の発見遅延', '避難所過密・受け入れ遅延', '医療資源逼迫による健康被害拡大']	['冠水長期化による孤立世帯の発生', '感染症・生活環境悪化による体調不良者増加', '支援班・救助班・医療班・救急隊の現場到着遅延', '臨時避難所運用・物資配布の遅延・混乱', '夜間対応困難による住民不安の拡大']
		1-22	250	発災102分後	夜間対応が続く中、避難所・サテライト避難所の現場では体調不良者・高齢者の健康観察と夜間巡回、照明・発電機のバッテリー残量点検、追加手配の準備が進められている。	現場班（避難誘導・保健師）	『避難所・サテライト避難所で体調不良者や高齢者の健康観察、夜間巡回を継続中。新たな急変者は現時点で発生していないが、照明・発電機のバッテリー残量が低下し始めている現場があり、追加手配も必要』との現場班からの報告が本部に入っている。	夜間で気温がさらに低下傾向。健康相談・応急手当のニーズが高く、医療スタッフ・保健師の現場展開が続いている。搬送希望者の優先順位付けは本部と連携して実施中。照明・発電機のバッテリー残量が心配な現場も複数ある。	淀川から約250mの低地で住宅密集地。南側が窪地で水が集まりやすく、都市型排水能力を超えた状態が長期化しやすい。要配慮者世帯も多い。	夜間・医療資源逼迫下での現場主導による健康観察・搬送調整・資機材管理体制の徹底訓練。住民の体調急変・安全確保、現場と本部・関係機関の連携強化を狙う。	夜間健康観察・巡回体制の維持、搬送希望者の優先順位付け、照明・発電機等の資機材管理・追加手配、現場と本部・関係機関の迅速な情報共有。現場リーダーの判断・調整力がポイント。	現場班による定時の健康観察・夜間巡回、搬送希望者リストの本部共有と優先順位付け、照明・発電機のバッテリー点検・追加手配、急変時の応急対応準備、住民への健康・安全指導、現場と本部・関係機関の情報共有体制強化。	医療スタッフ・資機材の不足、夜間・停電下での健康観察・応急対応の困難、搬送希望者の増加による調整遅延、現場と本部・関係機関間の情報伝達遅延、住民不安・混乱拡大、体調急変や事故への即応困難	道路は膝程度の冠水継続、床下10〜15cmの浸水、下水逆流・悪臭あり	床下浸水長期化・下水逆流・健康被害拡大・避難所過密・医療資源逼迫・夜間対応	床下浸水と下水逆流・悪臭が継続し、避難所・サテライト避難所双方で体調不良者・高齢者が増加。医療スタッフ・医薬品・搬送車両の不足が深刻化し、夜間対応や健康相談体制の強化が急務となっている。現場の搬送・物資調整と夜間対応の実践が引き続き求められる。	医療スタッフ・医薬品・照明機器の事前備蓄・迅速搬送、夜間巡回班の配置強化、要配慮者・高齢者見守り体制の徹底、現場・本部・避難所間の情報共有体制強化、住民への健康・安全指導・体調急変時の連絡方法周知、医療機関・ボランティアとの連携強化	平成25年台風18号時、同地域で夜間の照明・発電機・医療資源不足、避難所・現場での安否確認遅延、体調急変時の発見遅れや搬送困難が報告されている。	['床下浸水継続による家財・電気設備被害', '下水逆流による衛生被害・健康被害（体調不良者発生）', '生活物資不足による住民の体調不良・不安拡大', '夜間・停電下での事故・体調急変の発見遅延', '避難所過密・受け入れ遅延', '医療資源逼迫による健康被害拡大']	['冠水長期化による孤立世帯の発生', '感染症・生活環境悪化による体調不良者増加', '支援班・救助班・医療班・救急隊の現場到着遅延', '臨時避難所運用・物資配布の遅延・混乱', '夜間対応困難による住民不安の拡大']
		1-23	250	発災109分後	夜間対応が継続する中、現場では照明・発電機のバッテリー残量がさらに低下し、一部現場で照明の明るさが不足し始めている。健康観察・夜間巡回・応急手当体制を維持しつつ、現場班はバッテリー交換・追加搬入の手配状況を本部に報告する必要がある。	現場班（避難誘導・保健師）	『避難所・サテライト避難所で体調不良者や高齢者の健康観察、夜間巡回を継続中。新たな急変者は発生していないが、照明や発電機のバッテリー残量がさらに低下し、一部現場では照明が暗くなってきている。追加手配の資機材はまだ到着していない』との現場班からの報告が本部に入った。	現場は夜間の冷え込みが続き、健康相談や応急手当のニーズが高い。照明・発電機の追加手配は本部で調整中。住民の不安や安全確保への懸念が高まっている。	淀川から約250mの低地で住宅密集地。南側が窪地となっており、水が集まりやすい。都市型排水能力を超えた状態が長期化しやすく、要配慮者世帯も多い。	夜間・資機材不足時の現場対応力・住民安全確保・情報共有・応急体制維持を訓練する。	照明・発電機など資機材の管理・追加手配、暗所での健康観察・安全確保、現場と本部・関係機関の迅速な情報共有、住民の不安対応と安全指導。	現場班による照明・発電機のバッテリー点検・住民への安全指導、手持ちライトや誘導灯の活用、健康観察・夜間巡回の継続、追加資機材到着までの応急体制維持、本部・関係機関への状況報告と連携強化。	照明・発電機のバッテリー切れによる夜間対応困難、暗闇下での健康観察・応急手当の遅延、住民不安・混乱拡大、追加資機材到着遅延による安全確保の困難	道路は膝程度の冠水継続、床下10〜15cmの浸水、下水逆流・悪臭あり	床下浸水長期化・下水逆流・健康被害拡大・避難所過密・夜間対応・資機材不足	床下浸水と下水逆流・悪臭が継続。夜間に入り体調不良者や高齢者の健康観察・夜間巡回が続く中、照明・発電機のバッテリー残量がさらに低下し、一部現場で照明が不足。住民の不安や安全確保への懸念が高まっている。	照明・発電機等の資機材管理・追加手配、手持ちライトや誘導灯の応急活用、夜間巡回・健康観察体制の強化、情報共有体制の強化、住民への安全指導と体調急変時の連絡方法周知	平成25年台風18号時、同地域で夜間の照明・発電機不足、避難所・現場での安否確認遅延、体調急変時の発見遅れが報告されている。	['床下浸水継続による家財・電気設備被害', '下水逆流による衛生被害・健康被害（体調不良者発生）', '生活物資不足・医療資源逼迫による住民の体調不良・不安拡大', '夜間・停電下での事故・体調急変の発見遅延', '避難所過密・受け入れ遅延', '追加搬送希望者の増加による対応遅延', '照明・発電機バッテリー切れによる夜間対応困難']	['冠水長期化による孤立世帯の発生', '感染症・生活環境悪化による体調不良者増加', '支援班・救助班・医療班・救急隊の現場到着遅延', '臨時避難所運用・物資配布の遅延・混乱', '夜間対応困難による住民不安の拡大']
		1-24	250	発災114分後	夜間対応が続く中、避難所・サテライト避難所の一部で照明・発電機のバッテリー切れが発生し始め、現場班は手持ちライトや誘導灯を使った応急照明で健康観察・夜間巡回・見守りを継続。住民の転倒・事故リスクが高まっている。	現場班（避難誘導・保健師）	『避難所・サテライト避難所の一部で照明・発電機のバッテリーが切れ、手持ちライトや誘導灯で夜間巡回・健康観察を継続中。暗闇の中で住民の転倒や体調急変リスクが高まっている。追加資機材はまだ到着していない』との現場班からの報告が本部に入った。	現場は夜間の冷え込みが続き、健康相談や応急手当のニーズが高い。住民の不安や安全確保への懸念がさらに高まっており、追加の照明・発電機は本部で手配中だが道路冠水で搬入が遅れている。	淀川から約250mの低地で住宅密集地。南側が窪地となっており、水が集まりやすい。都市型排水能力を超えた状態が長期化しやすく、要配慮者世帯も多い。	夜間・資機材不足下での応急対応力・現場判断力・住民安全確保・本部連携の実践訓練。	資機材不足時の応急照明・誘導灯活用、夜間巡回・健康観察・住民安全指導、現場と本部間の情報共有・追加要請、住民不安・転倒リスク管理。	手持ちライト・誘導灯を活用した夜間巡回・健康観察、住民への夜間移動制限・転倒防止策の徹底、追加資機材到着までの応急体制維持、本部への状況報告・追加要請、住民への安全・健康指導。	照明・発電機不足による夜間対応困難、暗闇下での健康観察・応急手当の遅延、住民の転倒・事故・不安拡大、追加資機材搬入遅延による対応力低下	道路は膝程度の冠水継続、床下10〜15cmの浸水、下水逆流・悪臭あり	床下浸水長期化・下水逆流・健康被害拡大・避難所過密・夜間対応・資機材不足	床下浸水と下水逆流・悪臭が継続。夜間に入り照明・発電機のバッテリー切れが発生し、手持ち資機材による応急照明で夜間巡回・健康観察を継続。住民の転倒や体調急変リスクが高まっている。	照明・発電機等の資機材管理・追加手配、手持ちライトや誘導灯の応急活用、夜間巡回・健康観察体制の強化、住民への安全指導・夜間移動制限・体調急変時の連絡方法周知、情報共有体制の強化	平成25年台風18号時、同地域で夜間の照明・発電機不足、避難所・現場での安否確認遅延、体調急変時の発見遅れが報告されている。	['床下浸水継続による家財・電気設備被害', '下水逆流による衛生被害・健康被害（体調不良者発生）', '生活物資不足・医療資源逼迫による住民の体調不良・不安拡大', '夜間・停電下での事故・体調急変の発見遅延', '避難所過密・受け入れ遅延', '追加搬送希望者の増加による対応遅延', '照明・発電機バッテリー切れによる夜間対応困難']	['冠水長期化による孤立世帯の発生', '感染症・生活環境悪化による体調不良者増加', '支援班・救助班・医療班・救急隊の現場到着遅延', '臨時避難所運用・物資配布の遅延・混乱', '夜間対応困難による住民不安の拡大']
		1-25	250	発災118分後	照明・発電機のバッテリー切れがさらに進行し、一部避難所・サテライト避難所では応急照明のみで夜間巡回・健康観察を継続。住民からは暗闇や寒さへの不安、転倒・体調急変リスクについての相談が増加している。	現場班（避難誘導・保健師）	『避難所・サテライト避難所の一部で照明・発電機のバッテリー切れが長引き、手持ちライトや誘導灯で最低限の明かりを確保しながら夜間巡回・健康観察を続行中。住民からは暗闇や寒さへの不安の声が増え、転倒や体調急変のリスクが高まっている。追加資機材は依然到着せず、現場対応力の維持に努めている』との現場班からの報告。	現場は夜間の冷え込みが続き、健康相談や応急手当のニーズが高い。住民の不安や安全確保への懸念がさらに高まっており、追加の照明・発電機は本部で手配中だが、道路冠水のため搬入が遅延している。転倒事故や体調急変時の連絡方法は現場で再周知済み。	淀川から約250mの低地で住宅密集地。南側が窪地となっており、水が集まりやすい。都市型排水能力を超えた状態が長期化しやすく、要配慮者世帯も多い。	資機材不足・夜間下での現場主導による応急対応、住民安全確保、情報共有・工夫力の強化訓練。現場リーダーの判断力・連携力、住民の安全対策徹底を狙う。	照明・発電機不足時の現場運用の工夫、暗所での健康観察・応急手当継続、住民転倒事故等のリスク管理、現場と本部・関係機関の情報共有と追加資機材要請の徹底。	現場班による手持ち照明・誘導灯の最大活用、住民の夜間移動制限や転倒防止策の徹底、健康観察・応急手当の継続、本部への追加資機材要請・状況報告、住民への安全指導・不安解消の声かけ。	資機材不足による応急対応力の低下、暗闇下での転倒事故や健康観察の遅延、住民の不安・混乱拡大、追加資機材搬入の遅延、現場と本部間の情報伝達遅延	道路は膝程度の冠水継続、床下10〜15cmの浸水、下水逆流・悪臭あり	床下浸水長期化・下水逆流・健康被害拡大・避難所過密・夜間対応・資機材不足	床下浸水と下水逆流・悪臭が継続。夜間に入り照明・発電機のバッテリー切れが発生し、手持ち資機材による応急照明で夜間巡回・健康観察を継続。住民の転倒や体調急変リスクが高まっている。	照明・発電機等の資機材管理・追加手配、手持ちライトや誘導灯の応急活用、夜間巡回・健康観察体制の強化、住民への安全指導・夜間移動制限・体調急変時の連絡方法周知、情報共有体制の強化	平成25年台風18号時、同地域で夜間の照明・発電機不足、避難所・現場での安否確認遅延、体調急変時の発見遅れが報告されている。	['床下浸水継続による家財・電気設備被害', '下水逆流による衛生被害・健康被害（体調不良者発生）', '生活物資不足・医療資源逼迫による住民の体調不良・不安拡大', '夜間・停電下での事故・体調急変の発見遅延', '避難所過密・受け入れ遅延', '追加搬送希望者の増加による対応遅延', '照明・発電機バッテリー切れによる夜間対応困難']	['冠水長期化による孤立世帯の発生', '感染症・生活環境悪化による体調不良者増加', '支援班・救助班・医療班・救急隊の現場到着遅延', '臨時避難所運用・物資配布の遅延・混乱', '夜間対応困難による住民不安の拡大']
		1-26	250	発災121分後	照明・発電機のバッテリー切れが継続し、一部避難所・サテライト避難所では手持ちライトや誘導灯のみで夜間巡回・健康観察・住民見守りを続行。住民の転倒・体調急変リスクが高まっているため、現場では夜間移動制限の徹底と応急手当マニュアルの再確認が実施されている。	現場班（避難誘導・保健師）	『避難所・サテライト避難所の一部で照明・発電機のバッテリー切れが続き、手持ちライトや誘導灯のみで夜間巡回・健康観察・住民見守りを継続中。住民の一部からは暗闇や寒さへの不安、転倒や体調急変のリスクについての相談が増えている。追加資機材は依然到着していない』との現場班からの報告。	夜間の冷え込みが続き、健康相談や応急手当のニーズが高い。転倒事故や体調急変時の連絡方法は現場で再周知済み。追加照明・発電機は本部で手配中だが道路冠水で搬入が遅延。	淀川から約250mの低地で住宅密集地。南側が窪地となっており、水が集まりやすい。都市型排水能力を超えた状態が長期化しやすく、要配慮者世帯も多い。	資機材不足・夜間下での現場主導による応急対応、住民安全確保、情報共有・工夫力の強化訓練。現場リーダーの判断力・連携力、住民の安全対策徹底を狙う。	資機材不足時の応急照明・誘導灯活用、夜間巡回・健康観察・住民安全指導、現場と本部・関係機関の情報共有・追加要請、住民不安・転倒リスク管理。	現場班による手持ち照明・誘導灯の最大活用、住民の夜間移動制限や転倒防止策の徹底、健康観察・応急手当の継続、本部への追加資機材要請・状況報告、住民への安全指導・不安解消の声かけ。	資機材不足による応急対応力の低下、暗闇下での転倒事故や健康観察の遅延、住民の不安・混乱拡大、追加資機材搬入の遅延、現場と本部間の情報伝達遅延	道路は膝程度の冠水継続、床下10〜15cmの浸水、下水逆流・悪臭あり	床下浸水長期化・下水逆流・健康被害拡大・避難所過密・夜間対応・資機材不足	床下浸水と下水逆流・悪臭が継続。夜間に入り照明・発電機のバッテリー切れが発生し、手持ち資機材による応急照明で夜間巡回・健康観察・見守りを継続。住民の転倒や体調急変リスクが高まっている。	照明・発電機等の資機材管理・追加手配、手持ちライトや誘導灯の応急活用、夜間巡回・健康観察体制の強化、住民への安全指導・夜間移動制限・体調急変時の連絡方法周知、情報共有体制の強化	平成25年台風18号時、同地域で夜間の照明・発電機不足、避難所・現場での安否確認遅延、体調急変時の発見遅れが報告されている。	['床下浸水継続による家財・電気設備被害', '下水逆流による衛生被害・健康被害（体調不良者発生）', '生活物資不足・医療資源逼迫による住民の体調不良・不安拡大', '夜間・停電下での事故・体調急変の発見遅延', '避難所過密・受け入れ遅延', '追加搬送希望者の増加による対応遅延', '照明・発電機バッテリー切れによる夜間対応困難']	['冠水長期化による孤立世帯の発生', '感染症・生活環境悪化による体調不良者増加', '支援班・救助班・医療班・救急隊の現場到着遅延', '臨時避難所運用・物資配布の遅延・混乱', '夜間対応困難による住民不安の拡大']
		1-27	250	発災127分後	追加照明・発電機の搬入が依然として遅延しており、一部避難所・サテライト避難所では暗闇下で最低限の健康観察・応急手当・夜間巡回を継続。住民の転倒・事故防止や体調急変時の対応、夜間移動制限の徹底が続行されている。	現場班（避難誘導・保健師）	『避難所・サテライト避難所の一部で照明・発電機のバッテリー切れが長引き、手持ちライトや誘導灯のみで夜間巡回・健康観察・住民見守りを継続中。住民の一部からは暗闇や寒さへの不安、転倒や体調急変のリスクについての相談が増えている。夜間移動制限や転倒防止策の再周知、応急手当マニュアルの再確認を現場で実施中。追加資機材は依然到着していない』との報告。	夜間の冷え込みが続き、健康相談や応急手当のニーズが高い。転倒事故や体調急変時の連絡方法は現場で再周知済み。住民への声かけや見守り体制を強化しているが、追加照明・発電機は本部で手配中も道路冠水で搬入が遅延中。	淀川から約250mの低地で住宅密集地。南側が窪地となっており、水が集まりやすい。都市型排水能力を超えた状態が長期化しやすく、要配慮者世帯も多い。夜間は特に安全管理が課題。	資機材不足・夜間下での現場主導による応急対応力、住民安全確保、情報共有・現場判断力の強化訓練。現場リーダーの判断・連携力、住民の安全対策徹底、住民不安への対応力向上を狙う。	資機材不足時の応急照明・誘導灯活用、夜間巡回・健康観察・住民安全指導、現場と本部・関係機関の情報共有・追加要請、住民不安・転倒リスク管理、応急手当マニュアルの再徹底。	現場班による手持ち照明・誘導灯の最大活用、住民の夜間移動制限や転倒防止策の徹底、健康観察・応急手当の継続、本部への追加資機材要請・状況報告、住民への安全指導・不安解消の声かけ、応急手当マニュアルの再確認・周知。	資機材不足による応急対応力の低下、暗闇下での転倒事故や健康観察の遅延、住民の不安・混乱拡大、追加資機材搬入の遅延、現場と本部間の情報伝達遅延、体調急変や事故への即応困難	道路は膝程度の冠水継続、床下10〜15cmの浸水、下水逆流・悪臭あり	床下浸水長期化・下水逆流・健康被害拡大・避難所過密・夜間対応・資機材不足	床下浸水と下水逆流・悪臭が継続。夜間に入り照明・発電機のバッテリー切れが発生し、手持ち資機材による応急照明で夜間巡回・健康観察・見守りを継続。住民の転倒や体調急変リスクが高まっている。住民の不安も増大し、現場対応力の維持が課題となっている。	照明・発電機等の資機材管理・追加手配、手持ちライトや誘導灯の応急活用、夜間巡回・健康観察体制の強化、住民への安全指導・夜間移動制限・体調急変時の連絡方法周知、情報共有体制の強化、応急手当マニュアルの再確認・周知	平成25年台風18号時、同地域で夜間の照明・発電機不足、避難所・現場での安否確認遅延、体調急変時の発見遅れが報告されている。	['床下浸水継続による家財・電気設備被害', '下水逆流による衛生被害・健康被害（体調不良者発生）', '生活物資不足・医療資源逼迫による住民の体調不良・不安拡大', '夜間・停電下での事故・体調急変の発見遅延', '避難所過密・受け入れ遅延', '追加搬送希望者の増加による対応遅延', '照明・発電機バッテリー切れによる夜間対応困難']	['冠水長期化による孤立世帯の発生', '感染症・生活環境悪化による体調不良者増加', '支援班・救助班・医療班・救急隊の現場到着遅延', '臨時避難所運用・物資配布の遅延・混乱', '夜間対応困難による住民不安の拡大']
		1-28	250	発災132分後	照明・発電機のバッテリー切れが続く中、避難所・サテライト避難所では引き続き手持ちライトや誘導灯のみで夜間巡回・健康観察・住民見守りを継続。住民の転倒や体調急変リスクがさらに高まっているため、現場では夜間移動制限と応急手当マニュアルの再徹底、安全指導の強化が続行されている。	現場班（避難誘導・保健師）	『照明・発電機のバッテリー切れが続いており、現場では手持ちライトや誘導灯のみで夜間巡回・健康観察・住民見守りを継続中。住民の一部からは暗闇や寒さへの不安、転倒や体調急変のリスクについての相談が増えている。夜間移動制限や転倒防止策の再周知、応急手当マニュアルの再確認を現場で実施中。追加資機材は依然到着していない』との現場班からの報告。	夜間の冷え込みが続き、健康相談や応急手当のニーズが高い。転倒事故や体調急変時の連絡方法は現場で再周知済み。住民への声かけや見守り体制を強化しているが、追加照明・発電機は本部で手配中も道路冠水で搬入が遅延中。	淀川から約250mの低地で住宅密集地。南側が窪地となっており、水が集まりやすい。都市型排水能力を超えた状態が長期化しやすく、要配慮者世帯も多い。夜間は特に安全管理が課題。	資機材不足・夜間下での現場主導による応急対応力、住民安全確保、情報共有・現場判断力の強化訓練。現場リーダーの判断・連携力、住民の安全対策徹底、住民不安への対応力向上を狙う。	資機材不足時の応急照明・誘導灯活用、夜間巡回・健康観察・住民安全指導、現場と本部・関係機関の情報共有・追加要請、住民不安・転倒リスク管理、応急手当マニュアルの再徹底。	現場班による手持ち照明・誘導灯の最大活用、住民の夜間移動制限や転倒防止策の徹底、健康観察・応急手当の継続、本部への追加資機材要請・状況報告、住民への安全指導・不安解消の声かけ、応急手当マニュアルの再確認・周知。	資機材不足による応急対応力の低下、暗闇下での転倒事故や健康観察の遅延、住民の不安・混乱拡大、追加資機材搬入の遅延、現場と本部間の情報伝達遅延、体調急変や事故への即応困難	道路は膝程度の冠水が継続、床下10〜15cmの浸水、下水逆流・悪臭も継続中	床下浸水長期化・下水逆流・健康被害拡大・避難所過密・夜間対応・資機材不足	床下浸水と下水逆流・悪臭が継続。夜間に入り照明・発電機のバッテリー切れが発生し、手持ち資機材による応急照明で夜間巡回・健康観察・見守りを継続。住民の転倒や体調急変リスクが高まっている。住民の不安も増大し、現場対応力の維持が課題となっている。	照明・発電機等の資機材管理・追加手配、手持ちライトや誘導灯の応急活用、夜間巡回・健康観察体制の強化、住民への安全指導・夜間移動制限・体調急変時の連絡方法周知、情報共有体制の強化、応急手当マニュアルの再確認・周知	平成25年台風18号時、同地域で夜間の照明・発電機不足、避難所・現場での安否確認遅延、体調急変時の発見遅れが報告されている。	['床下浸水継続による家財・電気設備被害', '下水逆流による衛生被害・健康被害（体調不良者発生）', '生活物資不足・医療資源逼迫による住民の体調不良・不安拡大', '夜間・停電下での事故・体調急変の発見遅延', '避難所過密・受け入れ遅延', '追加搬送希望者の増加による対応遅延', '照明・発電機バッテリー切れによる夜間対応困難']	['冠水長期化による孤立世帯の発生', '感染症・生活環境悪化による体調不良者増加', '支援班・救助班・医療班・救急隊の現場到着遅延', '臨時避難所運用・物資配布の遅延・混乱', '夜間対応困難による住民不安の拡大']
		1-29	250	発災137分後	照明・発電機のバッテリー切れが続き、手持ちライトや誘導灯のみで夜間巡回・健康観察・住民見守りを継続。住民の転倒や体調急変リスクが一段と高まり、現場では夜間移動制限と応急手当マニュアルの再徹底、安全指導の強化が続行されている。	現場班（避難誘導・保健師）	『照明・発電機のバッテリー切れが続いており、現場では手持ちライトや誘導灯のみで夜間巡回・健康観察・住民見守りを継続中。住民の一部からは暗闇や寒さへの不安、転倒や体調急変のリスクについての相談が増えている。夜間移動制限や転倒防止策の再周知、応急手当マニュアルの再確認を現場で実施中。追加資機材は依然到着していない』との現場班からの報告。	夜間の冷え込みが続き、健康相談や応急手当のニーズが高い。転倒事故や体調急変時の連絡方法は現場で再周知済み。住民への声かけや見守り体制を強化しているが、追加照明・発電機は本部で手配中も道路冠水で搬入が遅延中。	淀川から約250mの低地で住宅密集地。南側が窪地となっており、水が集まりやすい。都市型排水能力を超えた状態が長期化しやすく、要配慮者世帯も多い。夜間は特に安全管理が課題。	資機材不足・夜間下での現場主導による応急対応力、住民安全確保、情報共有・現場判断力の強化訓練。現場リーダーの判断・連携力、住民の安全対策徹底、住民不安への対応力向上を狙う。	資機材不足時の応急照明・誘導灯活用、夜間巡回・健康観察・住民安全指導、現場と本部・関係機関の情報共有・追加要請、住民不安・転倒リスク管理、応急手当マニュアルの再徹底。	現場班による手持ち照明・誘導灯の最大活用、住民の夜間移動制限や転倒防止策の徹底、健康観察・応急手当の継続、本部への追加資機材要請・状況報告、住民への安全指導・不安解消の声かけ、応急手当マニュアルの再確認・周知。	資機材不足による応急対応力の低下、暗闇下での転倒事故や健康観察の遅延、住民の不安・混乱拡大、追加資機材搬入の遅延、現場と本部間の情報伝達遅延、体調急変や事故への即応困難	道路は膝程度の冠水が継続、床下10〜15cmの浸水、下水逆流・悪臭も継続中	床下浸水長期化・下水逆流・健康被害拡大・避難所過密・夜間対応・資機材不足	床下浸水と下水逆流・悪臭が継続。夜間に入り照明・発電機のバッテリー切れが発生し、手持ち資機材による応急照明で夜間巡回・健康観察・見守りを継続。住民の転倒や体調急変リスクが高まっている。住民の不安も増大し、現場対応力の維持が課題となっている。	照明・発電機等の資機材管理・追加手配、手持ちライトや誘導灯の応急活用、夜間巡回・健康観察体制の強化、住民への安全指導・夜間移動制限・体調急変時の連絡方法周知、情報共有体制の強化、応急手当マニュアルの再確認・周知	平成25年台風18号時、同地域で夜間の照明・発電機不足、避難所・現場での安否確認遅延、体調急変時の発見遅れが報告されている。	['床下浸水継続による家財・電気設備被害', '下水逆流による衛生被害・健康被害（体調不良者発生）', '生活物資不足・医療資源逼迫による住民の体調不良・不安拡大', '夜間・停電下での事故・体調急変の発見遅延', '避難所過密・受け入れ遅延', '追加搬送希望者の増加による対応遅延', '照明・発電機バッテリー切れによる夜間対応困難']	['冠水長期化による孤立世帯の発生', '感染症・生活環境悪化による体調不良者増加', '支援班・救助班・医療班・救急隊の現場到着遅延', '臨時避難所運用・物資配布の遅延・混乱', '夜間対応困難による住民不安の拡大']
		1-30	250	発災142分後	照明・発電機のバッテリー切れが長期化し、避難所・サテライト避難所では引き続き手持ちライトや誘導灯のみで夜間巡回・健康観察・住民見守りを継続。住民の転倒や体調急変リスクが一段と高まり、現場では夜間移動制限と応急手当マニュアルの徹底、安全指導の強化が続行されている。	現場班（避難誘導・保健師）	『照明・発電機のバッテリー切れが継続し、現場では手持ちライトや誘導灯のみで夜間巡回・健康観察・住民見守りを継続中です。住民の一部からは暗闇や寒さへの不安、転倒や体調急変のリスクについての相談が増えています。夜間移動制限や転倒防止策、応急手当マニュアルの再確認を現場で実施中。追加資機材は依然として到着していません』との現場班からの報告。	夜間の冷え込みが続き、健康相談や応急手当のニーズが高い。転倒事故や体調急変時の連絡方法は現場で再周知済み。住民への声かけや見守り体制を強化しているが、追加照明・発電機は本部で手配中も道路冠水で搬入が遅延している。	淀川から約250mの低地で住宅密集地。南側が窪地となっており、水が集まりやすい。都市型排水能力を超えた状態が長期化しやすく、要配慮者世帯も多い。夜間は特に安全管理が課題。	資機材不足・夜間下での現場主導による応急対応力・住民安全確保・情報共有・現場判断力の強化訓練。現場リーダーの判断・連携力、住民の安全対策徹底、住民不安への対応力向上を狙う。	資機材不足時の応急照明・誘導灯活用、夜間巡回・健康観察・住民安全指導、現場と本部・関係機関の情報共有・追加要請、住民不安・転倒リスク管理、応急手当マニュアルの再徹底。	現場班による手持ち照明・誘導灯の最大活用、住民の夜間移動制限や転倒防止策の徹底、健康観察・応急手当の継続、本部への追加資機材要請・状況報告、住民への安全指導・不安解消の声かけ、応急手当マニュアルの再確認・周知。	資機材不足による応急対応力の低下、暗闇下での転倒事故や健康観察の遅延、住民の不安・混乱拡大、追加資機材搬入の遅延、現場と本部間の情報伝達遅延、体調急変や事故への即応困難	道路は膝程度の冠水が継続、床下10〜15cmの浸水、下水逆流・悪臭も継続中	床下浸水長期化・下水逆流・健康被害拡大・避難所過密・夜間対応・資機材不足	床下浸水と下水逆流・悪臭が継続。夜間に入り照明・発電機のバッテリー切れが発生し、手持ち資機材による応急照明で夜間巡回・健康観察・見守りを継続。住民の転倒や体調急変リスクが高まっている。住民の不安も増大し、現場対応力の維持が課題となっている。	照明・発電機等の資機材管理・追加手配、手持ちライトや誘導灯の応急活用、夜間巡回・健康観察体制の強化、住民への安全指導・夜間移動制限・体調急変時の連絡方法周知、情報共有体制の強化、応急手当マニュアルの再確認・周知	平成25年台風18号時、同地域で夜間の照明・発電機不足、避難所・現場での安否確認遅延、体調急変時の発見遅れが報告されている。	['床下浸水継続による家財・電気設備被害', '下水逆流による衛生被害・健康被害（体調不良者発生）', '生活物資不足・医療資源逼迫による住民の体調不良・不安拡大', '夜間・停電下での事故・体調急変の発見遅延', '避難所過密・受け入れ遅延', '追加搬送希望者の増加による対応遅延', '照明・発電機バッテリー切れによる夜間対応困難']	['冠水長期化による孤立世帯の発生', '感染症・生活環境悪化による体調不良者増加', '支援班・救助班・医療班・救急隊の現場到着遅延', '臨時避難所運用・物資配布の遅延・混乱', '夜間対応困難による住民不安の拡大']
		1-31	250	発災147分後	照明・発電機のバッテリー切れが長期化し、引き続き手持ちライトや誘導灯のみで夜間巡回・健康観察・住民見守りを継続。住民の転倒や体調急変リスクが高まり、現場では夜間移動制限と応急手当マニュアルの徹底、安全指導の強化が続行されている。	現場班（避難誘導・保健師）	『照明・発電機のバッテリー切れが継続し、現場では手持ちライトや誘導灯のみで夜間巡回・健康観察・住民見守りを継続中です。住民の一部からは暗闇や寒さへの不安、転倒や体調急変のリスクについての相談が増えています。夜間移動制限や転倒防止策、応急手当マニュアルの再確認を現場で実施中。追加資機材は依然として到着していません』との現場班からの報告。	夜間の冷え込みが続き、健康相談や応急手当のニーズが高い。転倒事故や体調急変時の連絡方法は現場で再周知済み。住民への声かけや見守り体制を強化しているが、追加照明・発電機は本部で手配中も道路冠水で搬入が遅延している。	淀川から約250mの低地で住宅密集地。南側が窪地となっており、水が集まりやすい。都市型排水能力を超えた状態が長期化しやすく、要配慮者世帯も多い。夜間は特に安全管理が課題。	資機材不足・夜間下での現場主導による応急対応力・住民安全確保・情報共有・現場判断力の強化訓練。現場リーダーの判断・連携力、住民の安全対策徹底、住民不安への対応力向上を狙う。	資機材不足時の応急照明・誘導灯活用、夜間巡回・健康観察・住民安全指導、現場と本部・関係機関の情報共有・追加要請、住民不安・転倒リスク管理、応急手当マニュアルの再徹底。	現場班による手持ち照明・誘導灯の最大活用、住民の夜間移動制限や転倒防止策の徹底、健康観察・応急手当の継続、本部への追加資機材要請・状況報告、住民への安全指導・不安解消の声かけ、応急手当マニュアルの再確認・周知。	資機材不足による応急対応力の低下、暗闇下での転倒事故や健康観察の遅延、住民の不安・混乱拡大、追加資機材搬入の遅延、現場と本部間の情報伝達遅延、体調急変や事故への即応困難	道路は膝程度の冠水が継続、床下10〜15cmの浸水、下水逆流・悪臭も継続中	床下浸水長期化・下水逆流・健康被害拡大・避難所過密・夜間対応・資機材不足	床下浸水と下水逆流・悪臭が継続。夜間に入り照明・発電機のバッテリー切れが発生し、手持ち資機材による応急照明で夜間巡回・健康観察・見守りを継続。住民の転倒や体調急変リスクが高まっている。住民の不安も増大し、現場対応力の維持が課題となっている。	照明・発電機等の資機材管理・追加手配、手持ちライトや誘導灯の応急活用、夜間巡回・健康観察体制の強化、住民への安全指導・夜間移動制限・体調急変時の連絡方法周知、情報共有体制の強化、応急手当マニュアルの再確認・周知	平成25年台風18号時、同地域で夜間の照明・発電機不足、避難所・現場での安否確認遅延、体調急変時の発見遅れが報告されている。	['床下浸水継続による家財・電気設備被害', '下水逆流による衛生被害・健康被害（体調不良者発生）', '生活物資不足・医療資源逼迫による住民の体調不良・不安拡大', '夜間・停電下での事故・体調急変の発見遅延', '避難所過密・受け入れ遅延', '追加搬送希望者の増加による対応遅延', '照明・発電機バッテリー切れによる夜間対応困難']	['冠水長期化による孤立世帯の発生', '感染症・生活環境悪化による体調不良者増加', '支援班・救助班・医療班・救急隊の現場到着遅延', '臨時避難所運用・物資配布の遅延・混乱', '夜間対応困難による住民不安の拡大']
		1-32	250	発災152分後	照明・発電機のバッテリー切れが長期化し、手持ちライトや誘導灯のみで夜間巡回・健康観察・住民見守りを継続。住民の転倒や体調急変リスクがさらに高まり、現場では夜間移動制限・応急手当マニュアルの再徹底、安全指導の強化が続行されている。	現場班（避難誘導・保健師）	『照明・発電機のバッテリー切れが続いており、現場では手持ちライトや誘導灯のみで夜間巡回・健康観察・住民見守りを継続中です。住民の一部からは暗闇や寒さへの不安、転倒や体調急変のリスクについての相談が増えています。夜間移動制限や転倒防止策の再周知、応急手当マニュアルの再確認を現場で実施中。追加資機材は依然として到着していません』との現場班からの報告。	夜間の冷え込みが続き、健康相談や応急手当のニーズが高い。転倒事故や体調急変時の連絡方法は現場で再周知済み。住民への声かけや見守り体制を強化しているが、追加照明・発電機は本部で手配中も道路冠水で搬入が遅延している。	淀川から約250mの低地で住宅密集地。南側が窪地となっており、水が集まりやすい。都市型排水能力を超えた状態が長期化しやすく、要配慮者世帯も多い。夜間は特に安全管理が課題。	資機材不足・夜間下での現場主導による応急対応力・住民安全確保・情報共有・現場判断力の強化訓練。現場リーダーの判断・連携力、住民の安全対策徹底、住民不安への対応力向上を狙う。	資機材不足時の応急照明・誘導灯活用、夜間巡回・健康観察・住民安全指導、現場と本部・関係機関の情報共有・追加要請、住民不安・転倒リスク管理、応急手当マニュアルの再徹底。	現場班による手持ち照明・誘導灯の最大活用、住民の夜間移動制限や転倒防止策の徹底、健康観察・応急手当の継続、本部への追加資機材要請・状況報告、住民への安全指導・不安解消の声かけ、応急手当マニュアルの再確認・周知。	資機材不足による応急対応力の低下、暗闇下での転倒事故や健康観察の遅延、住民の不安・混乱拡大、追加資機材搬入の遅延、現場と本部間の情報伝達遅延、体調急変や事故への即応困難	道路は膝程度の冠水が継続、床下10〜15cmの浸水、下水逆流・悪臭も継続中	床下浸水長期化・下水逆流・健康被害拡大・避難所過密・夜間対応・資機材不足	床下浸水と下水逆流・悪臭が継続。夜間に入り照明・発電機のバッテリー切れが発生し、手持ち資機材による応急照明で夜間巡回・健康観察・見守りを継続。住民の転倒や体調急変リスクが高まっている。住民の不安も増大し、現場対応力の維持が課題となっている。	照明・発電機等の資機材管理・追加手配、手持ちライトや誘導灯の応急活用、夜間巡回・健康観察体制の強化、住民への安全指導・夜間移動制限・体調急変時の連絡方法周知、情報共有体制の強化、応急手当マニュアルの再確認・周知	平成25年台風18号時、同地域で夜間の照明・発電機不足、避難所・現場での安否確認遅延、体調急変時の発見遅れが報告されている。	['床下浸水継続による家財・電気設備被害', '下水逆流による衛生被害・健康被害（体調不良者発生）', '生活物資不足・医療資源逼迫による住民の体調不良・不安拡大', '夜間・停電下での事故・体調急変の発見遅延', '避難所過密・受け入れ遅延', '追加搬送希望者の増加による対応遅延', '照明・発電機バッテリー切れによる夜間対応困難']	['冠水長期化による孤立世帯の発生', '感染症・生活環境悪化による体調不良者増加', '支援班・救助班・医療班・救急隊の現場到着遅延', '臨時避難所運用・物資配布の遅延・混乱', '夜間対応困難による住民不安の拡大']
		1-33	250	発災157分後	照明・発電機のバッテリー切れが長期化し、引き続き手持ちライトや誘導灯のみで夜間巡回・健康観察・住民見守りを継続。住民の転倒や体調急変リスクがさらに高まっており、現場では夜間移動制限と応急手当マニュアルの再徹底、安全指導の強化が続行されている。	現場班（避難誘導・保健師）	『照明・発電機のバッテリー切れが続いており、現場では手持ちライトや誘導灯のみで夜間巡回・健康観察・住民見守りを継続中です。住民の一部からは暗闇や寒さへの不安、転倒や体調急変のリスクについての相談が増えています。夜間移動制限や転倒防止策、応急手当マニュアルの再確認を現場で実施中。追加資機材は依然として到着していません』との現場班からの報告。	手持ちの懐中電灯や誘導灯を最大限活用中。追加資機材は本部で手配中だが、道路冠水・渋滞で搬入が遅延している。住民への転倒防止・夜間移動制限の声かけや見守り体制も強化中。	淀川から約250mの低地で住宅密集地。南側が窪地となっており、水が集まりやすい。都市型排水能力を超えた状態が長期化しやすく、要配慮者世帯も多い。夜間は特に安全管理が課題。	資機材不足・夜間下での現場主導による応急対応力・住民安全確保・情報共有・現場判断力の強化訓練。現場リーダーの判断・連携力、住民の安全対策徹底、住民不安への対応力向上を狙う。	資機材不足時の応急照明・誘導灯活用、夜間巡回・健康観察・住民安全指導、現場と本部・関係機関の情報共有・追加要請、住民不安・転倒リスク管理、応急手当マニュアルの再徹底。	現場班による手持ち照明・誘導灯の最大活用、住民の夜間移動制限や転倒防止策の徹底、健康観察・応急手当の継続、本部への追加資機材要請・状況報告、住民への安全指導・不安解消の声かけ、応急手当マニュアルの再確認・周知。	資機材不足による応急対応力の低下、暗闇下での転倒事故や健康観察の遅延、住民の不安・混乱拡大、追加資機材搬入の遅延、現場と本部間の情報伝達遅延、体調急変や事故への即応困難	道路は膝程度の冠水が継続、床下10〜15cmの浸水、下水逆流・悪臭も継続中	床下浸水長期化・下水逆流・健康被害拡大・避難所過密・夜間対応・資機材不足	床下浸水と下水逆流・悪臭が継続。夜間に入り照明・発電機のバッテリー切れが発生し、手持ち資機材による応急照明で夜間巡回・健康観察・見守りを継続。住民の転倒や体調急変リスクが高まっている。住民の不安も増大し、現場対応力の維持が課題となっている。	照明・発電機等の資機材管理・追加手配、手持ちライトや誘導灯の応急活用、夜間巡回・健康観察体制の強化、住民への安全指導・夜間移動制限・体調急変時の連絡方法周知、情報共有体制の強化、応急手当マニュアルの再確認・周知	平成25年台風18号時、同地域で夜間の照明・発電機不足、避難所・現場での安否確認遅延、体調急変時の発見遅れが報告されている。	['床下浸水継続による家財・電気設備被害', '下水逆流による衛生被害・健康被害（体調不良者発生）', '生活物資不足・医療資源逼迫による住民の体調不良・不安拡大', '夜間・停電下での事故・体調急変の発見遅延', '避難所過密・受け入れ遅延', '追加搬送希望者の増加による対応遅延', '照明・発電機バッテリー切れによる夜間対応困難']	['冠水長期化による孤立世帯の発生', '感染症・生活環境悪化による体調不良者増加', '支援班・救助班・医療班・救急隊の現場到着遅延', '臨時避難所運用・物資配布の遅延・混乱', '夜間対応困難による住民不安の拡大']
		1-34	250	発災161分後	照明・発電機のバッテリー切れが長期化し、引き続き手持ちライトや誘導灯のみで夜間巡回・健康観察・住民見守りを継続。住民の転倒や体調急変リスクが非常に高い状態が続いており、現場では夜間移動制限・応急手当マニュアルの再徹底、安全指導の強化が継続中。	現場班（避難誘導・保健師）	『照明・発電機のバッテリー切れが続いており、現場では手持ちライトや誘導灯のみで夜間巡回・健康観察・住民見守りを続けています。住民の一部からは暗闇・寒さへの不安、転倒や体調急変のリスク相談が続出。夜間移動制限や転倒防止策、応急手当マニュアルの再確認・再周知を現場で強化中。追加資機材は依然未到着です』との現場班からの報告。	手持ちの懐中電灯や誘導灯を最大限活用中。追加資機材は本部で手配中だが、道路冠水・渋滞で搬入が遅延している。住民への転倒防止・夜間移動制限の声かけや見守り体制も強化中。	淀川から約250mの低地で住宅密集地。南側が窪地となっており、水が集まりやすい。都市型排水能力を超えた状態が長期化しやすく、要配慮者世帯も多い。夜間は特に安全管理が課題。	資機材不足・夜間下での現場主導による応急対応力・住民安全確保・情報共有・現場判断力の強化訓練。現場リーダーの判断・連携力、住民の安全対策徹底、住民不安への対応力向上を狙う。	資機材不足時の応急照明・誘導灯活用、夜間巡回・健康観察・住民安全指導、現場と本部・関係機関の情報共有・追加要請、住民不安・転倒リスク管理、応急手当マニュアルの再徹底。	現場班による手持ち照明・誘導灯の最大活用、住民の夜間移動制限や転倒防止策の徹底、健康観察・応急手当の継続、本部への追加資機材要請・状況報告、住民への安全指導・不安解消の声かけ、応急手当マニュアルの再確認・周知。	資機材不足による応急対応力の低下、暗闇下での転倒事故や健康観察の遅延、住民の不安・混乱拡大、追加資機材搬入の遅延、現場と本部間の情報伝達遅延、体調急変や事故への即応困難	道路は膝程度の冠水が継続、床下10〜15cmの浸水、下水逆流・悪臭も継続中	床下浸水長期化・下水逆流・健康被害拡大・避難所過密・夜間対応・資機材不足	床下浸水と下水逆流・悪臭が継続。夜間に入り照明・発電機のバッテリー切れが発生し、手持ち資機材による応急照明で夜間巡回・健康観察・見守りを継続。住民の転倒や体調急変リスクが高まっている。住民の不安も増大し、現場対応力の維持が課題となっている。	照明・発電機等の資機材管理・追加手配、手持ちライトや誘導灯の応急活用、夜間巡回・健康観察体制の強化、住民への安全指導・夜間移動制限・体調急変時の連絡方法周知、情報共有体制の強化、応急手当マニュアルの再確認・周知	平成25年台風18号時、同地域で夜間の照明・発電機不足、避難所・現場での安否確認遅延、体調急変時の発見遅れが報告されている。	['床下浸水継続による家財・電気設備被害', '下水逆流による衛生被害・健康被害（体調不良者発生）', '生活物資不足・医療資源逼迫による住民の体調不良・不安拡大', '夜間・停電下での事故・体調急変の発見遅延', '避難所過密・受け入れ遅延', '追加搬送希望者の増加による対応遅延', '照明・発電機バッテリー切れによる夜間対応困難']	['冠水長期化による孤立世帯の発生', '感染症・生活環境悪化による体調不良者増加', '支援班・救助班・医療班・救急隊の現場到着遅延', '臨時避難所運用・物資配布の遅延・混乱', '夜間対応困難による住民不安の拡大']
		1-35	250	発災166分後	照明・発電機のバッテリー切れが長期化し、手持ちライトや誘導灯のみで夜間巡回・健康観察・住民見守りを継続。住民の転倒や体調急変リスクが非常に高い状態が続いており、現場では夜間移動制限・応急手当マニュアルの再徹底、安全指導の強化が続行されている。	現場班（避難誘導・保健師）	『照明・発電機のバッテリー切れが続いており、現場では手持ちライトや誘導灯のみで夜間巡回・健康観察・住民見守りを続けています。住民の一部からは暗闇や寒さへの不安、転倒や体調急変のリスク相談が続出。夜間移動制限や転倒防止策、応急手当マニュアルの再確認・再周知を現場で強化中。追加資機材は依然未到着です』との現場班からの報告。	手持ちの懐中電灯や誘導灯を最大限活用中。追加資機材は本部で手配中だが、道路冠水・渋滞で搬入が遅延している。住民への転倒防止・夜間移動制限の声かけや見守り体制も強化中。	淀川から約250mの低地で住宅密集地。南側が窪地となっており、水が集まりやすい。都市型排水能力を超えた状態が長期化しやすく、要配慮者世帯も多い。夜間は特に安全管理が課題。	資機材不足・夜間下での現場主導による応急対応力・住民安全確保・情報共有・現場判断力の強化訓練。現場リーダーの判断・連携力、住民の安全対策徹底、住民不安への対応力向上を狙う。	資機材不足時の応急照明・誘導灯活用、夜間巡回・健康観察・住民安全指導、現場と本部・関係機関の情報共有・追加要請、住民不安・転倒リスク管理、応急手当マニュアルの再徹底。	現場班による手持ち照明・誘導灯の最大活用、住民の夜間移動制限や転倒防止策の徹底、健康観察・応急手当の継続、本部への追加資機材要請・状況報告、住民への安全指導・不安解消の声かけ、応急手当マニュアルの再確認・周知。	資機材不足による応急対応力の低下、暗闇下での転倒事故や健康観察の遅延、住民の不安・混乱拡大、追加資機材搬入の遅延、現場と本部間の情報伝達遅延、体調急変や事故への即応困難	道路は膝程度の冠水が継続、床下10〜15cmの浸水、下水逆流・悪臭も継続中	床下浸水長期化・下水逆流・健康被害拡大・避難所過密・夜間対応・資機材不足	床下浸水と下水逆流・悪臭が継続。夜間に入り照明・発電機のバッテリー切れが発生し、手持ち資機材による応急照明で夜間巡回・健康観察・見守りを継続。住民の転倒や体調急変リスクが高まっている。住民の不安も増大し、現場対応力の維持が課題となっている。	照明・発電機等の資機材管理・追加手配、手持ちライトや誘導灯の応急活用、夜間巡回・健康観察体制の強化、住民への安全指導・夜間移動制限・体調急変時の連絡方法周知、情報共有体制の強化、応急手当マニュアルの再確認・周知	平成25年台風18号時、同地域で夜間の照明・発電機不足、避難所・現場での安否確認遅延、体調急変時の発見遅れが報告されている。	['床下浸水継続による家財・電気設備被害', '下水逆流による衛生被害・健康被害（体調不良者発生）', '生活物資不足・医療資源逼迫による住民の体調不良・不安拡大', '夜間・停電下での事故・体調急変の発見遅延', '避難所過密・受け入れ遅延', '追加搬送希望者の増加による対応遅延', '照明・発電機バッテリー切れによる夜間対応困難']	['冠水長期化による孤立世帯の発生', '感染症・生活環境悪化による体調不良者増加', '支援班・救助班・医療班・救急隊の現場到着遅延', '臨時避難所運用・物資配布の遅延・混乱', '夜間対応困難による住民不安の拡大']
		1-36	250	発災173分後	照明・発電機のバッテリー切れが長期化し、手持ちライトや誘導灯のみで夜間巡回・健康観察・住民見守りを継続。住民の転倒や体調急変リスクが非常に高い状態が続いており、現場では夜間移動制限・応急手当マニュアルの再徹底、安全指導の強化が継続中。	現場班（避難誘導・保健師）	『照明・発電機のバッテリー切れが続いており、現場では手持ちライトや誘導灯のみで夜間巡回・健康観察・住民見守りを続けています。住民の一部からは暗闇や寒さへの不安、転倒や体調急変のリスク相談が続出。夜間移動制限や転倒防止策、応急手当マニュアルの再確認・再周知を現場で強化中。追加資機材は依然未到着です』との現場班からの報告。	手持ちの懐中電灯や誘導灯を最大限活用中。追加資機材は本部で手配中だが、道路冠水・渋滞で搬入が遅延している。住民への転倒防止・夜間移動制限の声かけや見守り体制も強化中。	淀川から約250mの低地で住宅密集地。南側が窪地となっており、水が集まりやすい。都市型排水能力を超えた状態が長期化しやすく、要配慮者世帯も多い。夜間は特に安全管理が課題。	資機材不足・夜間下での現場主導による応急対応力・住民安全確保・情報共有・現場判断力の強化訓練。現場リーダーの判断・連携力、住民の安全対策徹底、住民不安への対応力向上を狙う。	資機材不足時の応急照明・誘導灯活用、夜間巡回・健康観察・住民安全指導、現場と本部・関係機関の情報共有・追加要請、住民不安・転倒リスク管理、応急手当マニュアルの再徹底。	現場班による手持ち照明・誘導灯の最大活用、住民の夜間移動制限や転倒防止策の徹底、健康観察・応急手当の継続、本部への追加資機材要請・状況報告、住民への安全指導・不安解消の声かけ、応急手当マニュアルの再確認・周知。	資機材不足による応急対応力の低下、暗闇下での転倒事故や健康観察の遅延、住民の不安・混乱拡大、追加資機材搬入の遅延、現場と本部間の情報伝達遅延、体調急変や事故への即応困難	道路は膝程度の冠水が継続、床下10〜15cmの浸水、下水逆流・悪臭も継続中	床下浸水長期化・下水逆流・健康被害拡大・避難所過密・夜間対応・資機材不足	床下浸水と下水逆流・悪臭が継続。夜間に入り照明・発電機のバッテリー切れが発生し、手持ち資機材による応急照明で夜間巡回・健康観察・見守りを継続。住民の転倒や体調急変リスクが高まっている。住民の不安も増大し、現場対応力の維持が課題となっている。	照明・発電機等の資機材管理・追加手配、手持ちライトや誘導灯の応急活用、夜間巡回・健康観察体制の強化、住民への安全指導・夜間移動制限・体調急変時の連絡方法周知、情報共有体制の強化、応急手当マニュアルの再確認・周知	平成25年台風18号時、同地域で夜間の照明・発電機不足、避難所・現場での安否確認遅延、体調急変時の発見遅れが報告されている。	['床下浸水継続による家財・電気設備被害', '下水逆流による衛生被害・健康被害（体調不良者発生）', '生活物資不足・医療資源逼迫による住民の体調不良・不安拡大', '夜間・停電下での事故・体調急変の発見遅延', '避難所過密・受け入れ遅延', '追加搬送希望者の増加による対応遅延', '照明・発電機バッテリー切れによる夜間対応困難']	['冠水長期化による孤立世帯の発生', '感染症・生活環境悪化による体調不良者増加', '支援班・救助班・医療班・救急隊の現場到着遅延', '臨時避難所運用・物資配布の遅延・混乱', '夜間対応困難による住民不安の拡大']
		1-37	250	発災177分後	照明・発電機のバッテリー切れが長期化し、手持ちライトや誘導灯のみで夜間巡回・健康観察・住民見守りを継続。住民の転倒や体調急変リスクが非常に高い状態が続き、現場では夜間移動制限・応急手当マニュアルの再徹底、安全指導の強化が継続中。	現場班（避難誘導・保健師）	『照明・発電機のバッテリー切れが続いており、現場では手持ちライトや誘導灯のみで夜間巡回・健康観察・住民見守りを続けています。住民の一部からは暗闇や寒さへの不安、転倒や体調急変のリスク相談が続出。夜間移動制限や転倒防止策、応急手当マニュアルの再確認・再周知を現場で強化中。追加資機材は依然未到着です』との現場班からの報告。	手持ちの懐中電灯や誘導灯を最大限活用中。追加資機材は本部で手配中だが、道路冠水・渋滞で搬入が遅延している。住民への転倒防止・夜間移動制限の声かけや見守り体制も強化中。	淀川から約250mの低地で住宅密集地。南側が窪地となっており、水が集まりやすい。都市型排水能力を超えた状態が長期化しやすく、要配慮者世帯も多い。夜間は特に安全管理が課題。	資機材不足・夜間下での現場主導による応急対応力・住民安全確保・情報共有・現場判断力の強化訓練。現場リーダーの判断・連携力、住民の安全対策徹底、住民不安への対応力向上を狙う。	資機材不足時の応急照明・誘導灯活用、夜間巡回・健康観察・住民安全指導、現場と本部・関係機関の情報共有・追加要請、住民不安・転倒リスク管理、応急手当マニュアルの再徹底。	現場班による手持ち照明・誘導灯の最大活用、住民の夜間移動制限や転倒防止策の徹底、健康観察・応急手当の継続、本部への追加資機材要請・状況報告、住民への安全指導・不安解消の声かけ、応急手当マニュアルの再確認・周知。	資機材不足による応急対応力の低下、暗闇下での転倒事故や健康観察の遅延、住民の不安・混乱拡大、追加資機材搬入の遅延、現場と本部間の情報伝達遅延、体調急変や事故への即応困難	道路は膝程度の冠水が継続、床下10〜15cmの浸水、下水逆流・悪臭も継続中	床下浸水長期化・下水逆流・健康被害拡大・避難所過密・夜間対応・資機材不足	床下浸水と下水逆流・悪臭が継続。夜間に入り照明・発電機のバッテリー切れが発生し、手持ち資機材による応急照明で夜間巡回・健康観察・見守りを継続。住民の転倒や体調急変リスクが高まっている。住民の不安も増大し、現場対応力の維持が課題となっている。	照明・発電機等の資機材管理・追加手配、手持ちライトや誘導灯の応急活用、夜間巡回・健康観察体制の強化、住民への安全指導・夜間移動制限・体調急変時の連絡方法周知、情報共有体制の強化、応急手当マニュアルの再確認・周知	平成25年台風18号時、同地域で夜間の照明・発電機不足、避難所・現場での安否確認遅延、体調急変時の発見遅れが報告されている。	['床下浸水継続による家財・電気設備被害', '下水逆流による衛生被害・健康被害（体調不良者発生）', '生活物資不足・医療資源逼迫による住民の体調不良・不安拡大', '夜間・停電下での事故・体調急変の発見遅延', '避難所過密・受け入れ遅延', '追加搬送希望者の増加による対応遅延', '照明・発電機バッテリー切れによる夜間対応困難']	['冠水長期化による孤立世帯の発生', '感染症・生活環境悪化による体調不良者増加', '支援班・救助班・医療班・救急隊の現場到着遅延', '臨時避難所運用・物資配布の遅延・混乱', '夜間対応困難による住民不安の拡大']
		1-38	250	発災183分後	照明・発電機のバッテリー切れが長期化し、手持ちライトや誘導灯のみで夜間巡回・健康観察・住民見守りを続行。住民の転倒や体調急変リスクが非常に高い状態が続き、現場では夜間移動制限・応急手当マニュアルの再徹底、安全指導の強化が継続中。	現場班（避難誘導・保健師）	『照明・発電機のバッテリー切れが継続し、現場では手持ちライトや誘導灯のみで夜間巡回・健康観察・住民見守りを続けています。住民からは暗闇・寒さへの不安、転倒や体調急変リスクの相談が続出。夜間移動制限や転倒防止策、応急手当マニュアルの再確認・再周知を現場で強化中。追加資機材は依然未到着です』との現場班からの報告。	夜間の冷え込みが続き、健康相談や応急手当ニーズが高い。転倒事故や体調急変時の連絡方法は現場で再周知済み。住民への声かけ・見守り体制を強化しているが、追加照明・発電機は本部で手配中も道路冠水で搬入が遅延している。	淀川から約250mの低地で住宅密集地。南側が窪地となっており、水が集まりやすい。都市型排水能力を超えた状態が長期化しやすく、要配慮者世帯も多い。夜間は特に安全管理が課題。	資機材不足・夜間下での現場主導による応急対応力・住民安全確保・情報共有・現場判断力の強化訓練。現場リーダーの判断・連携力、住民の安全対策徹底、住民不安への対応力向上を狙う。	資機材不足時の応急照明・誘導灯活用、夜間巡回・健康観察・住民安全指導、現場と本部・関係機関の情報共有・追加要請、住民不安・転倒リスク管理、応急手当マニュアルの再徹底。	現場班による手持ち照明・誘導灯の最大活用、住民の夜間移動制限や転倒防止策の徹底、健康観察・応急手当の継続、本部への追加資機材要請・状況報告、住民への安全指導・不安解消の声かけ、応急手当マニュアルの再確認・周知。	資機材不足による応急対応力の低下、暗闇下での転倒事故や健康観察の遅延、住民の不安・混乱拡大、追加資機材搬入の遅延、現場と本部間の情報伝達遅延、体調急変や事故への即応困難	道路は膝程度の冠水継続、床下10〜15cmの浸水、下水逆流・悪臭も継続中	床下浸水長期化・下水逆流・健康被害拡大・避難所過密・夜間対応・資機材不足	床下浸水と下水逆流・悪臭が継続。夜間に入り照明・発電機のバッテリー切れが発生し、手持ち資機材による応急照明で夜間巡回・健康観察・見守りを継続。住民の転倒や体調急変リスクが高まっている。住民の不安も増大し、現場対応力の維持が課題となっている。	照明・発電機等の資機材管理・追加手配、手持ちライトや誘導灯の応急活用、夜間巡回・健康観察体制の強化、住民への安全指導・夜間移動制限・体調急変時の連絡方法周知、情報共有体制の強化、応急手当マニュアルの再確認・周知	平成25年台風18号時、同地域で夜間の照明・発電機不足、避難所・現場での安否確認遅延、体調急変時の発見遅れが報告されている。	['床下浸水継続による家財・電気設備被害', '下水逆流による衛生被害・健康被害（体調不良者発生）', '生活物資不足・医療資源逼迫による住民の体調不良・不安拡大', '夜間・停電下での事故・体調急変の発見遅延', '避難所過密・受け入れ遅延', '追加搬送希望者の増加による対応遅延', '照明・発電機バッテリー切れによる夜間対応困難']	['冠水長期化による孤立世帯の発生', '感染症・生活環境悪化による体調不良者増加', '支援班・救助班・医療班・救急隊の現場到着遅延', '臨時避難所運用・物資配布の遅延・混乱', '夜間対応困難による住民不安の拡大']

## Sheet: 枚方市養父東町10
評価	備考	シナリオID	(推測)災害の中心からの距離[m]	イベント発生時刻	付与内容	情報源	状況付与内容	補足情報	地形情報や想定想定される被害の特徴	訓練効果・狙い	判断ポイント	期待される対応行動	想定される課題	水位状況	被害の種類	詳細な被害状況	想定される対策	類似の過去事例(あれば記載)	直近のリスク	二次的なリスク
		1-4	1200	発災5分後					淀川本流から約1.2km離れており、周辺は住宅地と緩やかな高台が広がるエリア。標高は中心部より高く、直接的な氾濫水の流入リスクは極めて低い。低地のような広範囲な冠水は想定されにくい。					現時点で目立った増水や冠水は確認されていない	被害なし	現時点では道路や住宅への浸水・冠水は確認されていない。住民からの被害通報も入っていない。	今後の増水や下流域の氾濫情報に備えた情報収集と警戒態勢の維持。周辺住民への注意喚起と、要配慮者への状況確認を継続する。	平成25年台風18号時にも、淀川本流から離れた高台地域では大きな冠水被害は報告されていない。	[]	[]
		1-5	1200	発災10分後					淀川本流から約1.2km離れており、周辺は住宅地と緩やかな高台が広がるエリア。標高は中心部より高く、直接的な氾濫水の流入リスクは極めて低い。低地のような広範囲な冠水は想定されにくい。					現時点で目立った増水や冠水は確認されていない	被害なし	現時点では道路や住宅への浸水・冠水は確認されていない。住民からの被害通報も入っていない。	今後の増水や下流域の氾濫情報に備えた情報収集と警戒態勢の維持。周辺住民への注意喚起と、要配慮者への状況確認を継続する。	平成25年台風18号時にも、淀川本流から離れた高台地域では大きな冠水被害は報告されていない。	[]	[]
		1-6	1200	発災11分後					淀川本流から約1.2km離れた住宅地・緩やかな高台。標高は中心部より高く、直接的な氾濫水の流入リスクは極めて低い。周囲も高台で、広域の冠水や浸水被害は想定しにくい。					現時点で目立った増水や冠水は確認されていない	被害なし	現時点では道路や住宅への浸水・冠水は確認されていない。住民からの被害通報もなく、通常の生活が維持されている。	今後の増水や下流域の氾濫情報に備えた情報収集と警戒態勢の維持。周辺住民への注意喚起と、要配慮者への状況確認を継続する。	平成25年台風18号時にも、淀川本流から離れた高台地域では大きな冠水被害は報告されていない。	[]	[]
		1-7	1200	発災18分後					淀川本流から約1.2km離れた住宅地・緩やかな高台。標高は中心部より高く、直接的な氾濫水の流入リスクは極めて低い。周囲も高台で、広域の冠水や浸水被害は想定しにくい。					現時点で目立った増水や冠水は確認されていない	被害なし	道路や住宅への浸水・冠水は確認されていない。住民からの被害通報もなく、通常通りの生活が維持されている。	今後の増水や下流域の氾濫情報に備えた情報収集と警戒態勢の維持。周辺住民への注意喚起と、要配慮者への状況確認を継続する。	平成25年台風18号時にも、淀川本流から離れた高台地域では大きな冠水被害は報告されていない。	[]	[]
		1-8	1200	発災25分後					淀川本流から約1.2km離れており、周辺は住宅地と緩やかな高台が広がるエリア。標高は中心部より高く、直接的な氾濫水の流入リスクは極めて低い。低地のような広範囲な冠水は想定されにくい。					現時点で目立った増水や冠水は確認されていない	被害なし	道路や住宅への浸水・冠水は確認されていない。住民からの被害通報もなく、通常通りの生活が維持されている。	今後の増水や下流域の氾濫情報に備えた情報収集と警戒態勢の維持。周辺住民への注意喚起と、要配慮者への状況確認を継続する。	平成25年台風18号時にも、淀川本流から離れた高台地域では大きな冠水被害は報告されていない。	[]	[]
		1-9	1200	発災26分後					淀川本流から約1.2km離れており、周辺は住宅地と緩やかな高台が広がるエリア。標高は中心部より高く、直接的な氾濫水の流入リスクは極めて低い。低地のような広範囲な冠水は想定されにくい。					現時点で目立った増水や冠水は確認されていない	被害なし	道路や住宅への浸水・冠水は確認されていない。住民からの被害通報もなく、通常通りの生活が維持されている。	今後の増水や下流域の氾濫情報に備えた情報収集と警戒態勢の維持。周辺住民への注意喚起と、要配慮者への状況確認を継続する。	平成25年台風18号時にも、淀川本流から離れた高台地域では大きな冠水被害は報告されていない。	[]	[]
		1-10	1200	発災33分後					淀川本流から約1.2km離れた住宅地・緩やかな高台。標高は中心部より高く、直接的な氾濫水の流入リスクは極めて低い。周囲も高台で、広域の冠水や浸水被害は想定しにくい。					現時点で目立った増水や冠水は確認されていない	被害なし	道路や住宅への浸水・冠水は確認されていない。住民からの被害通報もなく、通常通りの生活が維持されている。	今後の増水や下流域の氾濫情報に備えた情報収集と警戒態勢の維持。周辺住民への注意喚起と、要配慮者への状況確認を継続する。	平成25年台風18号時にも、淀川本流から離れた高台地域では大きな冠水被害は報告されていない。	[]	[]
		1-11	1200	発災38分後					淀川本流から約1.2km離れており、周辺は住宅地と緩やかな高台が広がるエリア。標高は中心部より高く、直接的な氾濫水の流入リスクは極めて低い。低地のような広範囲な冠水は想定されにくい。					現時点で目立った増水や冠水は確認されていない	被害なし	道路や住宅への浸水・冠水は引き続き確認されていない。住民からの被害通報もなく、通常通りの生活が維持されている。	今後の増水や下流域の氾濫情報に備えた情報収集と警戒態勢の維持。周辺住民への注意喚起と、要配慮者への状況確認を継続する。	平成25年台風18号時にも、淀川本流から離れた高台地域では大きな冠水被害は報告されていない。	[]	[]
		1-12	1200	発災43分後					淀川本流から約1.2km離れており、周辺は住宅地と緩やかな高台が広がるエリア。標高は中心部より高く、直接的な氾濫水の流入リスクは極めて低い。低地のような広範囲な冠水は想定されにくい。					現時点で目立った増水や冠水は確認されていない	被害なし	道路や住宅への浸水・冠水は確認されていない。住民からの被害通報もなく、通常通りの生活が維持されている。	今後の増水や下流域の氾濫情報に備えた情報収集と警戒態勢の維持。周辺住民への注意喚起と、要配慮者への状況確認を継続する。	平成25年台風18号時にも、淀川本流から離れた高台地域では大きな冠水被害は報告されていない。	[]	[]
		1-13	1200	発災48分後					淀川本流から約1.2km離れた住宅地・緩やかな高台。標高は中心部より高く、直接的な氾濫水の流入リスクは極めて低い。周囲も高台で、広域の冠水や浸水被害は想定しにくい。					現時点で目立った増水や冠水は確認されていない	被害なし	道路や住宅への浸水・冠水は確認されていない。住民からの被害通報もなく、通常通りの生活が維持されている。	今後の増水や下流域の氾濫情報に備えた情報収集と警戒態勢の維持。周辺住民への注意喚起と、要配慮者への状況確認を継続する。	平成25年台風18号時にも、淀川本流から離れた高台地域では大きな冠水被害は報告されていない。	[]	[]
		1-14	1200	発災55分後					淀川本流から約1.2km離れた住宅地・緩やかな高台。標高は中心部より高く、直接的な氾濫水の流入リスクは極めて低い。周囲も高台で、広域の冠水や浸水被害は想定しにくい。					現時点で目立った増水や冠水は確認されていない	被害なし	道路や住宅への浸水・冠水は引き続き確認されていない。住民からの被害通報もなく、通常通りの生活が維持されている。	今後の増水や下流域の氾濫情報に備えた情報収集と警戒態勢の維持。周辺住民への注意喚起と、要配慮者への状況確認を継続する。	平成25年台風18号時にも、淀川本流から離れた高台地域では大きな冠水被害は報告されていない。	[]	[]
		1-15	1200	発災59分後					淀川本流から約1.2km離れた住宅地・緩やかな高台。標高は中心部より高く、直接的な氾濫水の流入リスクは極めて低い。周囲も高台で、広域の冠水や浸水被害は想定しにくい。					現時点で目立った増水や冠水は確認されていない	被害なし	道路や住宅への浸水・冠水は引き続き確認されていない。住民からの被害通報もなく、通常通りの生活が維持されている。	今後の増水や下流域の氾濫情報に備えた情報収集と警戒態勢の維持。周辺住民への注意喚起と、要配慮者への状況確認を継続する。	平成25年台風18号時にも、淀川本流から離れた高台地域では大きな冠水被害は報告されていない。	[]	[]
		1-16	1200	発災65分後					淀川本流から約1.2km離れた住宅地・緩やかな高台。標高は中心部より高く、直接的な氾濫水の流入リスクは極めて低い。周囲も高台で、広域の冠水や浸水被害は想定しにくい。					現時点で目立った増水や冠水は確認されていない	被害なし	道路や住宅への浸水・冠水は引き続き確認されていない。住民からの被害通報もなく、通常通りの生活が維持されている。	今後の増水や下流域の氾濫情報に備えた情報収集と警戒態勢の維持。周辺住民への注意喚起と、要配慮者への状況確認を継続する。	平成25年台風18号時にも、淀川本流から離れた高台地域では大きな冠水被害は報告されていない。	[]	[]
		1-17	1200	発災69分後					淀川本流から約1.2km離れた住宅地・緩やかな高台。標高は中心部より高く、直接的な氾濫水の流入リスクは極めて低い。広域の冠水・浸水被害は想定しにくい。					現時点で目立った増水や冠水は確認されていない	被害なし	道路や住宅への浸水・冠水は引き続き確認されていない。住民からの被害通報もなく、通常通りの生活が維持されている。	今後の増水や下流域の氾濫情報に備えた情報収集と警戒態勢の維持。周辺住民への注意喚起と、要配慮者への状況確認を継続する。	平成25年台風18号時にも、淀川本流から離れた高台地域では大きな冠水被害は報告されていない。	[]	[]
		1-18	1200	発災73分後					淀川本流から約1.2km離れた住宅地・緩やかな高台。標高は中心部より高く、直接的な氾濫水の流入リスクは極めて低い。広域の冠水・浸水被害は想定しにくい。					現時点で目立った増水や冠水は確認されていない	被害なし	道路や住宅への浸水・冠水は引き続き確認されていない。住民からの被害通報もなく、通常通りの生活が維持されている。	今後の増水や下流域の氾濫情報に備えた情報収集と警戒態勢の維持。周辺住民への注意喚起と、要配慮者への状況確認を継続する。	平成25年台風18号時にも、淀川本流から離れた高台地域では大きな冠水被害は報告されていない。	[]	[]
		1-19	1200	発災77分後					淀川本流から約1.2km離れた住宅地・緩やかな高台。標高は中心部より高く、直接的な氾濫水の流入リスクは極めて低い。広域の冠水・浸水被害は想定しにくい。					現時点で目立った増水や冠水は確認されていない	被害なし	道路や住宅への浸水・冠水は引き続き確認されていない。住民からの被害通報もなく、通常通りの生活が維持されている。	今後の増水や下流域の氾濫情報に備えた情報収集と警戒態勢の維持。周辺住民への注意喚起と、要配慮者への状況確認を継続する。	平成25年台風18号時にも、淀川本流から離れた高台地域では大きな冠水被害は報告されていない。	[]	[]
		1-20	1200	発災83分後					淀川本流から約1.2km離れた住宅地・緩やかな高台。標高は中心部より高く、直接的な氾濫水の流入リスクは極めて低い。広域の冠水・浸水被害は想定しにくい。					現時点で目立った増水や冠水は確認されていない	被害なし	道路や住宅への浸水・冠水は引き続き確認されていない。住民からの被害通報もなく、通常通りの生活が維持されている。	今後の増水や下流域の氾濫情報に備えた情報収集と警戒態勢の維持。周辺住民への注意喚起と、要配慮者への状況確認を継続する。	平成25年台風18号時にも、淀川本流から離れた高台地域では大きな冠水被害は報告されていない。	[]	[]
		1-21	1200	発災90分後					淀川本流から約1.2km離れた住宅地・緩やかな高台。標高は中心部より高く、直接的な氾濫水の流入リスクは極めて低い。広域の冠水・浸水被害は想定しにくい。					現時点で目立った増水や冠水は確認されていない	被害なし	道路や住宅への浸水・冠水は引き続き確認されていない。住民からの被害通報もなく、通常通りの生活が維持されている。	今後の増水や下流域の氾濫情報に備えた情報収集と警戒態勢の維持。周辺住民への注意喚起と、要配慮者への状況確認を継続する。	平成25年台風18号時にも、淀川本流から離れた高台地域では大きな冠水被害は報告されていない。	[]	[]
		1-22	1200	発災94分後					淀川本流から約1.2km離れた住宅地・緩やかな高台。標高は中心部より高く、直接的な氾濫水の流入リスクは極めて低い。広域の冠水・浸水被害は想定しにくい。					現時点で目立った増水や冠水は確認されていない	被害なし	道路や住宅への浸水・冠水は引き続き確認されていない。住民からの被害通報もなく、通常通りの生活が維持されている。	今後の増水や下流域の氾濫情報に備えた情報収集と警戒態勢の維持。周辺住民への注意喚起と、要配慮者への状況確認を継続する。	平成25年台風18号時にも、淀川本流から離れた高台地域では大きな冠水被害は報告されていない。	[]	[]
		1-23	1200	発災96分後					淀川本流から約1.2km離れた住宅地・緩やかな高台。標高は中心部より高く、直接的な氾濫水の流入リスクは極めて低い。広域の冠水・浸水被害は想定しにくい。					現時点で目立った増水や冠水は確認されていない	被害なし	道路や住宅への浸水・冠水は引き続き確認されていない。住民からの被害通報もなく、通常通りの生活が維持されている。	今後の増水や下流域の氾濫情報に備えた情報収集と警戒態勢の維持。周辺住民への注意喚起と、要配慮者への状況確認を継続する。	平成25年台風18号時にも、淀川本流から離れた高台地域では大きな冠水被害は報告されていない。	[]	[]
		1-24	1200	発災102分後					淀川本流から約1.2km離れた住宅地・緩やかな高台。標高は中心部より高く、直接的な氾濫水の流入リスクは極めて低い。広域の冠水・浸水被害は想定しにくい。					現時点で目立った増水や冠水は確認されていない	被害なし	道路や住宅への浸水・冠水は引き続き確認されていない。住民からの被害通報もなく、通常通りの生活が維持されている。	今後の増水や下流域の氾濫情報に備えた情報収集と警戒態勢の維持。周辺住民への注意喚起と、要配慮者への状況確認を継続する。	平成25年台風18号時にも、淀川本流から離れた高台地域では大きな冠水被害は報告されていない。	[]	[]
		1-25	1200	発災106分後					淀川本流から約1.2km離れた住宅地・緩やかな高台。標高は中心部より高く、直接的な氾濫水の流入リスクは極めて低い。広域の冠水・浸水被害は想定しにくい。					現時点で目立った増水や冠水は確認されていない	被害なし	道路や住宅への浸水・冠水は引き続き確認されていない。住民からの被害通報もなく、通常通りの生活が維持されている。	今後の増水や下流域の氾濫情報に備えた情報収集と警戒態勢の維持。周辺住民への注意喚起と、要配慮者への状況確認を継続する。	平成25年台風18号時にも、淀川本流から離れた高台地域では大きな冠水被害は報告されていない。	[]	[]
		1-26	1200	発災115分後					淀川本流から約1.2km離れた住宅地・緩やかな高台。標高は中心部より高く、直接的な氾濫水の流入リスクは極めて低い。周囲も高台で、広域の冠水や浸水被害は想定しにくい。					現時点で目立った増水や冠水は確認されていない	被害なし	道路や住宅への浸水・冠水は引き続き確認されていない。住民からの被害通報もなく、通常通りの生活が維持されている。	今後の増水や下流域の氾濫情報に備えた情報収集と警戒態勢の維持。周辺住民への注意喚起と、要配慮者への状況確認を継続する。	平成25年台風18号時にも、淀川本流から離れた高台地域では大きな冠水被害は報告されていない。	[]	[]
		1-27	1200	発災118分後					淀川本流から約1.2km離れた住宅地・緩やかな高台。標高は中心部や低地部より高く、直接的な氾濫水の流入リスクは極めて低い。過去の大規模洪水でも広域冠水は報告されていない。					現時点で目立った増水や冠水は確認されていない	被害なし	道路や住宅への浸水・冠水は引き続き確認されていない。住民からの被害通報もなく、通常通りの生活が維持されている。	今後の増水や下流域の氾濫情報に備えた情報収集と警戒態勢の維持。周辺住民への注意喚起と、要配慮者への状況確認を継続する。	平成25年台風18号時にも、淀川本流から離れた高台地域では大きな冠水被害は報告されていない。	[]	[]
		1-28	1200	発災123分後					淀川本流から約1.2km離れた住宅地・緩やかな高台。標高は中心部や低地部より高く、直接的な氾濫水の流入リスクは極めて低い。広域の冠水や浸水被害は想定しにくい。					現時点で目立った増水や冠水は確認されていない	被害なし	道路や住宅への浸水・冠水は引き続き確認されていない。住民からの被害通報もなく、通常通りの生活が維持されている。	今後の増水や下流域の氾濫情報に備えた情報収集と警戒態勢の維持。周辺住民への注意喚起と、要配慮者への状況確認を継続する。	平成25年台風18号時にも、淀川本流から離れた高台地域では大きな冠水被害は報告されていない。	[]	[]
		1-29	1200	発災130分後					淀川本流から約1.2km離れた住宅地・緩やかな高台。標高は中心部や低地部より高く、直接的な氾濫水の流入リスクは極めて低い。広域の冠水や浸水被害は想定しにくい。					現時点で目立った増水や冠水は確認されていない	被害なし	道路や住宅への浸水・冠水は引き続き確認されていない。住民からの被害通報もなく、通常通りの生活が維持されている。	今後の増水や下流域の氾濫情報に備えた情報収集と警戒態勢の維持。周辺住民への注意喚起と、要配慮者への状況確認を継続する。	平成25年台風18号時にも、淀川本流から離れた高台地域では大きな冠水被害は報告されていない。	[]	[]
		1-30	1200	発災135分後					淀川本流から約1.2km離れた住宅地・緩やかな高台。標高は中心部や低地部より高く、直接的な氾濫水の流入リスクは極めて低い。広域の冠水や浸水被害は想定しにくい。					現時点で目立った増水や冠水は確認されていない	被害なし	道路や住宅への浸水・冠水は引き続き確認されていない。住民からの被害通報もなく、通常通りの生活が維持されている。	今後の増水や下流域の氾濫情報に備えた情報収集と警戒態勢の維持。周辺住民への注意喚起と、要配慮者への状況確認を継続する。	平成25年台風18号時にも、淀川本流から離れた高台地域では大きな冠水被害は報告されていない。	[]	[]
		1-31	1200	発災139分後					淀川本流から約1.2km離れた住宅地・緩やかな高台。標高は中心部や低地部より高く、直接的な氾濫水の流入リスクは極めて低い。広域の冠水や浸水被害は想定しにくい。					現時点で目立った増水や冠水は確認されていない	被害なし	道路や住宅への浸水・冠水は引き続き確認されていない。住民からの被害通報もなく、通常通りの生活が維持されている。	今後の増水や下流域の氾濫情報に備えた情報収集と警戒態勢の維持。周辺住民への注意喚起と、要配慮者への状況確認を継続する。	平成25年台風18号時にも、淀川本流から離れた高台地域では大きな冠水被害は報告されていない。	[]	[]
		1-32	1200	発災145分後					淀川本流から約1.2km離れた住宅地・緩やかな高台。標高は中心部や低地部より高く、直接的な氾濫水の流入リスクは極めて低い。広域の冠水や浸水被害は想定しにくい。					現時点で目立った増水や冠水は確認されていない	被害なし	道路や住宅への浸水・冠水は引き続き確認されていない。住民からの被害通報もなく、通常通りの生活が維持されている。	今後の増水や下流域の氾濫情報に備えた情報収集と警戒態勢の維持。周辺住民への注意喚起と、要配慮者への状況確認を継続する。	平成25年台風18号時にも、淀川本流から離れた高台地域では大きな冠水被害は報告されていない。	[]	[]
		1-33	1200	発災148分後					淀川本流から約1.2km離れた住宅地・緩やかな高台。標高は中心部や低地部より高く、直接的な氾濫水の流入リスクは極めて低い。広域の冠水や浸水被害は想定しにくい。					目立った増水や冠水は引き続き確認されていない	被害なし	道路や住宅への浸水・冠水は引き続き発生しておらず、住民からの被害通報もない。通常通りの生活が維持されている。	今後の増水や下流域の氾濫情報に備えた情報収集と警戒態勢の維持。周辺住民への注意喚起、要配慮者への状況確認を継続。避難所開設準備や土のう配布体制の再確認も怠らない。	平成25年台風18号時にも、淀川本流から離れた高台地域では大きな冠水被害は報告されていない。	[]	[]
		1-34	1200	発災152分後					淀川本流から約1.2km離れた住宅地・緩やかな高台。標高は中心部や低地部より高く、直接的な氾濫水の流入リスクは極めて低い。広域の冠水や浸水被害は想定しにくい。					目立った増水や冠水は引き続き確認されていない	被害なし	道路や住宅への浸水・冠水は引き続き発生しておらず、住民からの被害通報もない。通常通りの生活が維持されている。	今後の増水や下流域の氾濫情報に備えた情報収集と警戒態勢の維持。周辺住民への注意喚起、要配慮者への状況確認を継続。避難所開設準備や土のう配布体制の再確認も怠らない。	平成25年台風18号時にも、淀川本流から離れた高台地域では大きな冠水被害は報告されていない。	[]	[]
		1-35	1200	発災157分後					淀川本流から約1.2km離れた住宅地・緩やかな高台。標高は中心部や低地部より高く、直接的な氾濫水の流入リスクは極めて低い。広域の冠水や浸水被害は想定しにくい。					目立った増水や冠水は引き続き確認されていない	被害なし	道路や住宅への浸水・冠水は引き続き発生しておらず、住民からの被害通報もない。通常通りの生活が維持されている。	今後の増水や下流域の氾濫情報に備えた情報収集と警戒態勢の維持。周辺住民への注意喚起、要配慮者への状況確認を継続。避難所開設準備や土のう配布体制の再確認も怠らない。	平成25年台風18号時にも、淀川本流から離れた高台地域では大きな冠水被害は報告されていない。	[]	[]
		1-36	1200	発災163分後					淀川本流から約1.2km離れた住宅地・緩やかな高台。標高は中心部や低地部より高く、直接的な氾濫水の流入リスクは極めて低い。広域の冠水や浸水被害は想定しにくい。					目立った増水や冠水は引き続き確認されていない	被害なし	道路や住宅への浸水・冠水は引き続き発生しておらず、住民からの被害通報もない。通常通りの生活が維持されている。	今後の増水や下流域の氾濫情報に備えた情報収集と警戒態勢の維持。周辺住民への注意喚起、要配慮者への状況確認を継続。避難所開設準備や土のう配布体制の再確認も怠らない。	平成25年台風18号時にも、淀川本流から離れた高台地域では大きな冠水被害は報告されていない。	[]	[]
		1-37	1200	発災168分後					淀川本流から約1.2km離れた住宅地・緩やかな高台。標高は中心部や低地部より高く、直接的な氾濫水の流入リスクは極めて低い。広域の冠水や浸水被害は想定しにくい。					目立った増水や冠水は引き続き確認されていない	被害なし	道路や住宅への浸水・冠水は引き続き発生しておらず、住民からの被害通報もない。通常通りの生活が維持されている。	今後の増水や下流域の氾濫情報に備えた情報収集と警戒態勢の維持。周辺住民への注意喚起、要配慮者への状況確認を継続。避難所開設準備や土のう配布体制の再確認も怠らない。	平成25年台風18号時にも、淀川本流から離れた高台地域では大きな冠水被害は報告されていない。	[]	[]
		1-38	1200	発災174分後					淀川本流から約1.2km離れた住宅地・緩やかな高台。標高は中心部や低地部より高く、直接的な氾濫水の流入リスクは極めて低い。広域の冠水や浸水被害は想定しにくい。					目立った増水や冠水は引き続き確認されていない	被害なし	道路や住宅への浸水・冠水は引き続き発生しておらず、住民からの被害通報もない。通常通りの生活が維持されている。	今後の増水や下流域の氾濫情報に備えた情報収集と警戒態勢の維持。周辺住民への注意喚起、要配慮者への状況確認を継続。避難所開設準備や土のう配布体制の再確認も怠らない。	平成25年台風18号時にも、淀川本流から離れた高台地域では大きな冠水被害は報告されていない。	[]	[]
		1-39	1200	発災177分後					淀川本流から約1.2km離れた住宅地・緩やかな高台。標高は中心部や低地部より高く、直接的な氾濫水の流入リスクは極めて低い。広域の冠水や浸水被害は想定しにくい。					目立った増水や冠水は引き続き確認されていない	被害なし	道路や住宅への浸水・冠水は引き続き発生しておらず、住民からの被害通報もない。通常通りの生活が維持されている。	今後の増水や下流域の氾濫情報に備えた情報収集と警戒態勢の維持。周辺住民への注意喚起、要配慮者への状況確認を継続。避難所開設準備や土のう配布体制の再確認も怠らない。	平成25年台風18号時にも、淀川本流から離れた高台地域では大きな冠水被害は報告されていない。	[]	[]
		1-40	1200	発災185分後					淀川本流から約1.2km離れた住宅地・緩やかな高台。標高は中心部や低地部より高く、直接的な氾濫水の流入リスクは極めて低い。広域の冠水や浸水被害は想定しにくい。					目立った増水や冠水は引き続き確認されていない	被害なし	道路や住宅への浸水・冠水は引き続き発生しておらず、住民からの被害通報もない。通常通りの生活が維持されている。	今後の増水や下流域の氾濫情報に備えた情報収集と警戒態勢の維持。周辺住民への注意喚起、要配慮者への状況確認を継続。避難所開設準備や土のう配布体制の再確認も怠らない。	平成25年台風18号時にも、淀川本流から離れた高台地域では大きな冠水被害は報告されていない。	[]	[]
